# Supplementary material for: Identification of Potential New Protein Vaccine Candidates through Pan-Surfomic Analysis of Pneumococcal Clinical Isolates from Adults
Source: PLoS One. 2013 Jul 23;8(7):e70365. doi: 10.1371/journal.pone.0070365 (PMC3720901; doi:10.1371/journal.pone.0070365)
Supplement: Dataset S2 — Sequest raw data of protein and peptide identifications for S. pneumoniae clinical isolates 5074-5, 5104-8, 5231-9V, 5278-14, 5284-9V, 5330-7F, 5333-19A and 5334-8. Each isolate’s data are given separately in one or more datasheets. (XLS) [file pone.0070365.s003.xls]

## Sheet: 5074-5 (1)
Accession #	Coverage	# Peptides	#AAs	Score	Description
gi307067664	6.23	9	289	10.3016	hypothetical protein SPAP_1039 [Streptococcus pneumoniae AP200]
	Sequence	# Proteins	# Protein Groups	Activation Type	Modifications	Probability	XCorr	Δ Score	Rank	Charge	MH+ [Da]	ΔM [ppm]	First Scan	Last Scan	RT [min]	MSOrder	Ions Matched	Annotation
	NELSASELAAAqAYWNGK	1	1	CID	Q12(Deamidated)	45.6874	4.75838	0	1	2	1923.91	1.33827	2314	2314	52.2468	MS2	21/34
	nELSASELAAAQAYWNGK	1	1	CID	N1(Deamidated)	17.6335	3.69058	0.224404	3	2	1923.91	1.33827	2314	2314	52.2468	MS2	17/34
	NELSASELAAAQAYWnGK	1	1	CID	N16(Deamidated)	35.4144	3.61458	0.240375	4	2	1923.91	1.33827	2314	2314	52.2468	MS2	20/34
	NELSASELAAAqAYWNGK	1	1	CID	Q12(Deamidated)	42.8956	2.8991	0	2	2	1923.91	2.4369	2498	2498	55.276	MS2	18/34
	NELSASELAAAQAYWnGK	1	1	CID	N16(Deamidated)	20.429	2.64416	0	1	3	1923.91	3.27795	2366	2366	53.0922	MS2	20/68
	NELSASELAAAQAYWnGK	1	1	CID	N16(Deamidated)	23.9767	2.43984	0.158417	3	2	1923.91	2.4369	2498	2498	55.276	MS2	16/34
	NELSASELAAAqAYWNGK	1	1	CID	Q12(Deamidated)	39.3626	2.36179	0.106789	2	3	1923.91	3.27795	2366	2366	53.0922	MS2	21/68
	nELSASELAAAQAYWNGK	1	1	CID	N1(Deamidated)	23.9767	1.96661	0.321649	4	2	1923.91	2.4369	2498	2498	55.276	MS2	14/34
	nELSASELAAAQAYWNGK	1	1	CID	N1(Deamidated)	29.4239	1.86878	0.293245	4	3	1923.91	3.27795	2366	2366	53.0922	MS2	21/68
gi15901039	5.25	5	819	10.0193	hypothetical protein SP_1174 [Streptococcus pneumoniae TIGR4]
	Sequence	# Proteins	# Protein Groups	Activation Type	Modifications	Probability	XCorr	Δ Score	Rank	Charge	MH+ [Da]	ΔM [ppm]	First Scan	Last Scan	RT [min]	MSOrder	Ions Matched	Annotation
	NELSASELAAAEAYWNGK	7	1	CID		45.6874	4.75838	0	2	2	1923.91	1.33427	2314	2314	52.2468	MS2	21/34
	NELSASELAAAEAYWNGK	7	1	CID		42.8956	2.8991	0	1	2	1923.91	2.4329	2498	2498	55.276	MS2	18/34
	NELSASELAAAEAYWNGK	7	1	CID		39.3626	2.36179	0.106789	3	3	1923.91	3.27395	2366	2366	53.0922	MS2	21/68
	GYTLEDLLATVK	13	2	CID		19.5481	1.3205	0	1	2	1322.72	0.733564	2667	2667	58.3321	MS2	12/22
	FEWFDEGLYEAPK	14	2	CID		18.7062	1.16371	0	1	2	1630.75	2.57142	2409	2409	53.7724	MS2	10/24
gi307127232	5.12	6	840	8.83827	pneumococcal histidine triad protein B [Streptococcus pneumoniae 670-6B]
	Sequence	# Proteins	# Protein Groups	Activation Type	Modifications	Probability	XCorr	Δ Score	Rank	Charge	MH+ [Da]	ΔM [ppm]	First Scan	Last Scan	RT [min]	MSOrder	Ions Matched	Annotation
	NELSASELAAAEAFLSGR	14	1	CID		42.9365	3.75661	0	1	2	1835.91	-0.591904	2938	2938	63.1469	MS2	20/34
	NELSASELAAAEAFLSGR	14	1	CID		15.929	3.09247	0	1	3	1835.91	0.249141	2881	2881	62.2426	MS2	26/68
	NELSASELAAAEAFLSGR	14	1	CID		18.4419	1.98919	0	1	2	1835.92	2.09364	3119	3119	66.5094	MS2	11/34
	GYTLEDLLATVK	13	2	CID		19.5481	1.3205	0	1	2	1322.72	0.733564	2667	2667	58.3321	MS2	12/22
	FEWFDEGLYEAPK	14	2	CID		18.7062	1.16371	0	1	2	1630.75	2.57142	2409	2409	53.7724	MS2	10/24
	NELSASELAAAEAFLSGR	14	1	CID		11.7429	0.85786	0	1	2	1835.91	0.0184472	2770	2770	60.1333	MS2	8/34
gi307126614	11.48	4	427	6.49097	trigger factor [Streptococcus pneumoniae 670-6B]
	Sequence	# Proteins	# Protein Groups	Activation Type	Modifications	Probability	XCorr	Δ Score	Rank	Charge	MH+ [Da]	ΔM [ppm]	First Scan	Last Scan	RT [min]	MSOrder	Ions Matched	Annotation
	DAVEGAAIDTAVENAEIVELPEEmIHEEVHR	9	1	CID	M24(Oxidation)	34.9431	2.72449	0	1	4	3431.62	-2.40766	2545	2545	56.1837	MS2	27/180
	EEAYKDAVEGAAIDTAVENAEIVELPEEmIHEEVHR	8	1	CID	M29(Oxidation)	13.8531	2.46169	0	1	5	4051.91	-0.438337	2648	2648	58.0178	MS2	39/280
	DAVEGAAIDTAVENAEIVELPEEmIHEEVHR	9	1	CID	M24(Oxidation)	36.9217	2.1473	0	1	3	3431.62	-2.69939	2547	2547	56.2132	MS2	17/120
	DIDEEVETLADLK	9	1	CID		43.9068	1.61918	0	1	2	1489.73	-0.403272	2096	2096	48.62	MS2	13/24
gi307128212	19.4	4	335	5.47316	glyceraldehyde-3-phosphate dehydrogenase, type I [Streptococcus pneumoniae 670-6B]
	Sequence	# Proteins	# Protein Groups	Activation Type	Modifications	Probability	XCorr	Δ Score	Rank	Charge	MH+ [Da]	ΔM [ppm]	First Scan	Last Scan	RT [min]	MSOrder	Ions Matched	Annotation
	VPTPTGSVTELVAVLEK	6	1	CID		6.30798	2.54489	0	1	3	1739.98	1.53264	2784	2784	60.4256	MS2	14/64
	VVSWYDnEmSYTAQLVR	6	1	CID	N7(Deamidated) M9(Oxidation)	14.9536	1.19679	0	1	2	2077.96	8.35936	2122	2122	49.1039	MS2	11/32
	VVSWYDNEmSYTAqLVR	6	1	CID	M9(Oxidation) Q14(Deamidated)	23.9	1.08489	0.0934985	2	2	2077.96	8.35936	2122	2122	49.1039	MS2	12/32
	ALQDNFGVVEGLmTTIHAYTGDQmILDGPHR	6	1	CID	M13(Oxidation) M24(Oxidation)	44.0794	0.990871	0.124773	2	4	3431.62	-11.8451	2895	2895	62.4271	MS2	28/180
gi307127077	22.95	3	122	5.15801	50S ribosomal protein L7/L12 [Streptococcus pneumoniae 670-6B]
	Sequence	# Proteins	# Protein Groups	Activation Type	Modifications	Probability	XCorr	Δ Score	Rank	Charge	MH+ [Da]	ΔM [ppm]	First Scan	Last Scan	RT [min]	MSOrder	Ions Matched	Annotation
	AIEEEFGVTAAAPVAVAAADAADAGAAK	2	1	CID		34.5624	3.08588	0	1	3	2557.28	0.753516	2299	2299	51.9812	MS2	28/108
	AIEEEFGVTAAAPVAVAAADAADAGAAK	2	1	CID		30.5509	2.07213	0	1	3	2557.28	4.04941	2485	2485	55.0725	MS2	29/108
	AIEEEFGVTAAAPVAVAAADAADAGAAK	2	1	CID		29.1339	1.20395	0	1	2	2557.28	2.35388	2330	2330	52.462	MS2	12/54
gi307127876	4.53	4	419	4.44037	cell division protein FtsZ [Streptococcus pneumoniae 670-6B]
	Sequence	# Proteins	# Protein Groups	Activation Type	Modifications	Probability	XCorr	Δ Score	Rank	Charge	MH+ [Da]	ΔM [ppm]	First Scan	Last Scan	RT [min]	MSOrder	Ions Matched	Annotation
	FEAPISQDEDELDTPPFFK	4	1	CID		82.5937	2.34089	0	1	2	2225.03	1.98388	2554	2554	56.3319	MS2	16/36
	FEAPISQDEDELDTPPFFK	4	1	CID		27.0004	2.09948	0	1	3	2225.03	-2.36307	2489	2489	55.1297	MS2	16/72
	FEAPISQDEDELDTPPFFK	4	1	CID		43.1009	1.40558	0	1	2	2225.03	4.66942	2380	2380	53.3113	MS2	12/36
	FEAPISQDEDELDTPPFFK	4	1	CID		6.03847	1.0596	0	1	2	2225.03	0.763174	2736	2736	59.5462	MS2	8/36
gi225858795	5.9	3	305	4.36099	zinc-binding lipoprotein AdcA [Streptococcus pneumoniae 70585]
	Sequence	# Proteins	# Protein Groups	Activation Type	Modifications	Probability	XCorr	Δ Score	Rank	Charge	MH+ [Da]	ΔM [ppm]	First Scan	Last Scan	RT [min]	MSOrder	Ions Matched	Annotation
	TYLENLEENmSVLAEELK	3	1	CID	M10(Oxidation)	11.8953	2.44076	0	1	3	2141.03	-0.957323	2391	2391	53.4577	MS2	20/68
	TYLENLEENmSVLAEELK	3	1	CID	M10(Oxidation)	16.3478	1.92023	0	1	2	2141.03	-2.34769	2543	2543	56.1545	MS2	17/34
	TYLENLEENmSVLAEELK	3	1	CID	M10(Oxidation)	74.2701	0.69753	0	1	2	2141.03	-6.0098	2364	2364	53.0652	MS2	9/34
gi307126714	10.55	3	398	2.95458	phosphoglycerate kinase [Streptococcus pneumoniae 670-6B]
	Sequence	# Proteins	# Protein Groups	Activation Type	Modifications	Probability	XCorr	Δ Score	Rank	Charge	MH+ [Da]	ΔM [ppm]	First Scan	Last Scan	RT [min]	MSOrder	Ions Matched	Annotation
	GAELEAAINALEDGQVLLVENTR	4	1	CID		65.9874	2.95458	0	1	3	2425.26	1.04949	3370	3370	71.0644	MS2	28/88
	DTEGEAVSEGFLGLDIGPK	4	1	CID		3.81265	1.21644	0	1	2	1933.94	5.83052	2270	2270	51.485	MS2	11/36
	DTEGEAVSEGFLGLDIGPK	4	1	CID		6.45425	1.08151	0	1	2	1933.94	-2.7144	2455	2455	54.5553	MS2	8/36
gi307126444	16.29	1	178	2.12541	50S ribosomal protein L6 [Streptococcus pneumoniae 670-6B]
	Sequence	# Proteins	# Protein Groups	Activation Type	Modifications	Probability	XCorr	Δ Score	Rank	Charge	MH+ [Da]	ΔM [ppm]	First Scan	Last Scan	RT [min]	MSOrder	Ions Matched	Annotation
	SHPDEVEAPEGITFELPNPTTIVVSGISK	6	1	CID		30.8659	2.12541	0	1	3	3063.56	2.9176	2893	2893	62.3989	MS2	24/112
gi307127551	4.79	2	501	2.06029	pyruvate kinase [Streptococcus pneumoniae 670-6B]
	Sequence	# Proteins	# Protein Groups	Activation Type	Modifications	Probability	XCorr	Δ Score	Rank	Charge	MH+ [Da]	ΔM [ppm]	First Scan	Last Scan	RT [min]	MSOrder	Ions Matched	Annotation
	IENQQGIDNLDEIIEAADGImIAR	6	1	CID	M21(Oxidation)	15.6352	2.06029	0	1	3	2657.31	2.47715	2986	2986	64.108	MS2	19/92
	IENQQGIDNLDEIIEAADGImIAR	6	1	CID	M21(Oxidation)	31.2505	0.692171	0.214337	2	2	2657.3	-7.51917	3033	3033	64.962	MS2	7/46
gi307126945	4.77	2	398	2.02121	translation elongation factor Tu [Streptococcus pneumoniae 670-6B]
	Sequence	# Proteins	# Protein Groups	Activation Type	Modifications	Probability	XCorr	Δ Score	Rank	Charge	MH+ [Da]	ΔM [ppm]	First Scan	Last Scan	RT [min]	MSOrder	Ions Matched	Annotation
	DTDKPLLLPVEDVFSITGR	2	1	CID		45.2207	2.02121	0.0965764	2	3	2115.13	-0.962929	2936	2936	63.1196	MS2	21/72
	DTDKPLLLPVEDVFSITGR	2	1	CID		30.5025	0.863359	0	1	2	2115.14	2.95677	2963	2963	63.6386	MS2	8/36
gi307128357	9.48	2	232	2.01629	tetrahydrodipicolinate N-succinyltransferase [Streptococcus pneumoniae 670-6B]
	Sequence	# Proteins	# Protein Groups	Activation Type	Modifications	Probability	XCorr	Δ Score	Rank	Charge	MH+ [Da]	ΔM [ppm]	First Scan	Last Scan	RT [min]	MSOrder	Ions Matched	Annotation
	DVAPLLEGLVENQDYVVEQDAR	5	1	CID		24.0021	2.01629	0	1	3	2472.22	-2.39572	2755	2755	59.9028	MS2	20/84
	DVAPLLEGLVENQDYVVEQDAR	5	1	CID		11.5911	0.823849	0	1	2	2472.22	-4.15229	2757	2757	59.9319	MS2	8/42
gi307126310	8.87	1	203	1.70733	30S ribosomal protein S4 [Streptococcus pneumoniae 670-6B]
	Sequence	# Proteins	# Protein Groups	Activation Type	Modifications	Probability	XCorr	Δ Score	Rank	Charge	MH+ [Da]	ΔM [ppm]	First Scan	Last Scan	RT [min]	MSOrder	Ions Matched	Annotation
	DEINPEINEALVVEFYNK	1	1	CID		14.5987	1.70733	0	1	2	2136.05	1.19755	2573	2573	56.6082	MS2	10/34
gi307126489	3.75	2	693	0	translation elongation factor G [Streptococcus pneumoniae 670-6B]
	Sequence	# Proteins	# Protein Groups	Activation Type	Modifications	Probability	XCorr	Δ Score	Rank	Charge	MH+ [Da]	ΔM [ppm]	First Scan	Last Scan	RT [min]	MSOrder	Ions Matched	Annotation
	GINPDTDAEETRPASDEEPFAALAFK	3	1	CID		8.07328	1.80281	0	1	3	2791.32	13.7529	2262	2262	51.3604	MS2	19/100
	GINPDTDAEETRPASDEEPFAALAFK	3	1	CID		12.0731	1.27795	0	1	3	2791.31	6.24561	2076	2076	48.3233	MS2	15/100
gi307126587	4.43	1	474	0	6-phosphogluconate dehydrogenase, decarboxylating [Streptococcus pneumoniae 670-6B]
	Sequence	# Proteins	# Protein Groups	Activation Type	Modifications	Probability	XCorr	Δ Score	Rank	Charge	MH+ [Da]	ΔM [ppm]	First Scan	Last Scan	RT [min]	MSOrder	Ions Matched	Annotation
	KDDEDQDGPIVDYILDAAGNK	2	1	CID		34.3433	1.96109	0	1	3	2291.07	4.13709	2483	2483	55.0435	MS2	15/80
gi307127015	5.26	1	342	0	S-adenosylmethionine:tRNA ribosyltransferase-isomerase [Streptococcus pneumoniae 670-6B]
	Sequence	# Proteins	# Protein Groups	Activation Type	Modifications	Probability	XCorr	Δ Score	Rank	Charge	MH+ [Da]	ΔM [ppm]	First Scan	Last Scan	RT [min]	MSOrder	Ions Matched	Annotation
	DASKLLIVnRETGEmqDK	10	1	CID	N9(Deamidated) M15(Oxidation) Q16(Deamidated)	16.1386	1.56926	0	1	3	2065	-11.2438	2886	2886	62.3464	MS2	8/68
gi307127048	1.83	1	872	0	alanyl-tRNA synthetase [Streptococcus pneumoniae 670-6B]
	Sequence	# Proteins	# Protein Groups	Activation Type	Modifications	Probability	XCorr	Δ Score	Rank	Charge	MH+ [Da]	ΔM [ppm]	First Scan	Last Scan	RT [min]	MSOrder	Ions Matched	Annotation
	LSGKVYDqDGDnMSFK	4	1	CID	Q8(Deamidated) N12(Deamidated)	5.1299	0.454748	0	1	3	1805.79	4.44238	2164	2164	49.8291	MS2	8/60
gi307128055	2.61	1	268	0	nicotinamide mononucleotide transporter PnuC [Streptococcus pneumoniae 670-6B]
	Sequence	# Proteins	# Protein Groups	Activation Type	Modifications	Probability	XCorr	Δ Score	Rank	Charge	MH+ [Da]	ΔM [ppm]	First Scan	Last Scan	RT [min]	MSOrder	Ions Matched	Annotation
	MHTYLqK	2	1	CID	Q6(Deamidated)	1.56749	0.509682	0	1	1	921.458	7.81535	2636	2636	57.772	MS2	4/12
gi225857997	7.05	6	638	0	surface protein PspA [Streptococcus pneumoniae 70585]
	Sequence	# Proteins	# Protein Groups	Activation Type	Modifications	Probability	XCorr	Δ Score	Rank	Charge	MH+ [Da]	ΔM [ppm]	First Scan	Last Scan	RT [min]	MSOrder	Ions Matched	Annotation
	DVEDFKNSDGEYSALYLEAAEK	1	1	CID		19.7839	1.7043	0	1	3	2493.13	1.70397	1843	1843	43.8084	MS2	15/84
	LSKLEELSDKIDELDAEIAKLEK	1	1	CID		11.3189	1.51672	0	1	4	2629.42	4.63304	3102	3102	66.1437	MS2	24/132
	LSKLEELSDKIDELDAEIAK	1	1	CID		9.4519	1.25622	0.360515	7	4	2259.2	1.17538	2582	2582	56.7771	MS2	17/114
	LEELSDKIDELDAEIAK	1	1	CID		27.3516	1.04038	0.44025	9	3	1930.99	4.86137	2004	2004	47.0532	MS2	18/64
	DVEDFKNSDGEYSALYLEAAEK	1	1	CID		11.9475	0.984839	0.376522	5	3	2493.13	2.25328	1996	1996	46.9056	MS2	17/84
	LEELSDKIDELDAEIAK	1	1	CID		4.42728	0.661798	0.457203	2	2	1930.98	-1.10663	2031	2031	47.4994	MS2	5/32
gi225859021	4.38	1	365	0	NisK [Streptococcus pneumoniae 70585]
	Sequence	# Proteins	# Protein Groups	Activation Type	Modifications	Probability	XCorr	Δ Score	Rank	Charge	MH+ [Da]	ΔM [ppm]	First Scan	Last Scan	RT [min]	MSOrder	Ions Matched	Annotation
	VSAmAHDLKTPLTVIK	1	1	CID	M4(Oxidation)	6.91778	1.79703	0.293866	2	3	1739.98	8.05764	2784	2784	60.4256	MS2	12/60
gi225859572	20.95	1	105	0	lichenan-specific phosphotransferase enzyme iia component (pts system lichenan-specific eiia component) (eiia-lic) (eiii-lic) [Streptococcus pneumoniae 70585]
	Sequence	# Proteins	# Protein Groups	Activation Type	Modifications	Probability	XCorr	Δ Score	Rank	Charge	MH+ [Da]	ΔM [ppm]	First Scan	Last Scan	RT [min]	MSOrder	Ions Matched	Annotation
	RLADAnAALLqAHKAqTEMLTR	4	1	CID	N6(Deamidated) Q11(Deamidated) Q16(Deamidated)	4.92647	1.79009	0.394131	3	3	2425.26	7.58149	3370	3370	71.0644	MS2	17/84
gi307066694	1.78	1	3035	0	PblB, putative [Streptococcus pneumoniae AP200]
	Sequence	# Proteins	# Protein Groups	Activation Type	Modifications	Probability	XCorr	Δ Score	Rank	Charge	MH+ [Da]	ΔM [ppm]	First Scan	Last Scan	RT [min]	MSOrder	Ions Matched	Annotation
	SqTTSAQTALSGDLDVLK	1	1	CID	Q2(Deamidated)	3.67715	0.864855	0.720336	3	3	1835.91	-9.62686	2881	2881	62.2426	MS2	11/68
gi307066819	10.99	2	191	0	hypothetical protein SPAP_0190 [Streptococcus pneumoniae AP200]
	Sequence	# Proteins	# Protein Groups	Activation Type	Modifications	Probability	XCorr	Δ Score	Rank	Charge	MH+ [Da]	ΔM [ppm]	First Scan	Last Scan	RT [min]	MSOrder	Ions Matched	Annotation
	KEFCIPnNKKSFVmLEGWIqK	1	1	CID	N7(Deamidated) M14(Oxidation) Q20(Deamidated)	17.1272	0.833485	0.307707	2	2	2557.28	-2.49312	2330	2330	52.462	MS2	5/40
	KEFCIPNnKKSFVmLEGWIqK	1	1	CID	N8(Deamidated) M14(Oxidation) Q20(Deamidated)	8.31599	0.799101	0.336266	3	2	2557.28	-2.49312	2330	2330	52.462	MS2	6/40
gi307067830	5.05	2	574	0	PTS system phosphoenolpyruvate-protein kinase [Streptococcus pneumoniae AP200]
	Sequence	# Proteins	# Protein Groups	Activation Type	Modifications	Probability	XCorr	Δ Score	Rank	Charge	MH+ [Da]	ΔM [ppm]	First Scan	Last Scan	RT [min]	MSOrder	Ions Matched	Annotation
	KLPNPASINEEVIVIAHDLTPSDTAQLDK	6	1	CID		7.57315	1.86078	0	1	4	3128.65	-1.39243	3084	3084	65.8419	MS2	22/168
	KLPNPASINEEVIVIAHDLTPSDTAQLDK	6	1	CID		21.73	1.46209	0	1	3	3128.65	5.27385	3092	3092	65.9767	MS2	14/112
gi307068470	10.72	1	345	0	threonine dehydrogenase-like Zn-dependent dehydrogenase [Streptococcus pneumoniae AP200]
	Sequence	# Proteins	# Protein Groups	Activation Type	Modifications	Probability	XCorr	Δ Score	Rank	Charge	MH+ [Da]	ΔM [ppm]	First Scan	Last Scan	RT [min]	MSOrder	Ions Matched	Annotation
	IPGQPSDYTEGmLQSLLTLADVmPTCYHAARVAnVqK	1	1	CID	M12(Oxidation) M23(Oxidation) N34(Deamidated) Q36(Deamidated)	7.45192	1.36311	0.358521	5	4	4051.91	-36.7974	2707	2707	59.1009	MS2	23/216
gi182683062	6.21	1	354	0	hypothetical protein SPCG_0092 [Streptococcus pneumoniae CGSP14]
	Sequence	# Proteins	# Protein Groups	Activation Type	Modifications	Probability	XCorr	Δ Score	Rank	Charge	MH+ [Da]	ΔM [ppm]	First Scan	Last Scan	RT [min]	MSOrder	Ions Matched	Annotation
	NTQLEEEVSQAEVELESQQEEK	3	1	CID		55.6264	1.69318	0	1	3	2576.19	3.19906	2228	2228	50.7857	MS2	19/84
gi225854284	7.63	1	262	0	hydrolase, alpha/beta fold family, putative [Streptococcus pneumoniae JJA]
	Sequence	# Proteins	# Protein Groups	Activation Type	Modifications	Probability	XCorr	Δ Score	Rank	Charge	MH+ [Da]	ΔM [ppm]	First Scan	Last Scan	RT [min]	MSOrder	Ions Matched	Annotation
	KVmFADFSENPYPKMEEQMR	1	1	CID	M3(Oxidation)	3.32581	1.67925	0.0146968	2	3	2493.13	7.32897	1843	1843	43.8084	MS2	12/76
gi298502340	38.96	1	77	0	hypothetical protein HMPREF0837_10838 [Streptococcus pneumoniae TCH8431/19A]
	Sequence	# Proteins	# Protein Groups	Activation Type	Modifications	Probability	XCorr	Δ Score	Rank	Charge	MH+ [Da]	ΔM [ppm]	First Scan	Last Scan	RT [min]	MSOrder	Ions Matched	Annotation
	MDTKMMSQFAVmDNEmLARIEGGDVSDIYR	1	1	CID	M12(Oxidation) M16(Oxidation)	8.04028	1.592	0.0758219	2	5	3485.55	-5.81767	2570	2570	56.5734	MS2	26/232
gi15900275	4.37	1	481	0	capsular polysaccharide biosynthesis protein Cps4A [Streptococcus pneumoniae TIGR4]
	Sequence	# Proteins	# Protein Groups	Activation Type	Modifications	Probability	XCorr	Δ Score	Rank	Charge	MH+ [Da]	ΔM [ppm]	First Scan	Last Scan	RT [min]	MSOrder	Ions Matched	Annotation
	YYPAGNVHLDSEQALGFVRER	1	1	CID		2.6748	1.82672	0	1	3	2421.2	1.40777	2355	2355	52.8905	MS2	8/80

## Sheet: 5074-5 (2)
Accession #	Coverage	# Peptides	#AAs	Score	Description
gi225857997	28.68	54	638	91.7577	surface protein PspA [Streptococcus pneumoniae 70585]
	Sequence	# Proteins	# Protein Groups	Activation Type	Modifications	Probability	XCorr	Δ Score	Rank	Charge	MH+ [Da]	ΔM [ppm]	First Scan	Last Scan	RT [min]	MSOrder	Ions Matched	Annotation
	LSKLEELSDKIDELDAEIAK	3	2	CID		100.97	5.4939	0	1	3	2259.2	0.273302	4450	4450	74.9143	MS2	34/76
	LEKDVEDFKNSDGEYSALYLEAAEK	1	1	CID		73.7128	4.10301	0	1	3	2863.35	-0.0874016	3081	3081	57.1103	MS2	32/96
	LEELSDKIDELDAEIAKLEK	1	1	CID		103.998	3.93133	0	1	3	2301.21	0.140313	4584	4584	77.0973	MS2	30/76
	LEELSDKIDELDAEIAK	3	2	CID		99.2049	3.87287	0	1	2	1930.98	-0.86249	3841	3841	66.3064	MS2	23/32
	NSDGEYSALYLEAAEK	1	1	CID		64.5127	3.60489	0	1	2	1759.8	1.10896	5627	5627	97.835	MS2	18/30
	NSDGEYSALYLEAAEK	1	1	CID		97.5756	3.58062	0	1	2	1759.8	0.620674	5488	5488	94.7853	MS2	15/30
	NSDGEYSALYLEAAEK	1	1	CID		140.515	3.5444	0	1	2	1759.8	-0.111748	2735	2735	52.9014	MS2	20/30
	LKEIDESDSEDYVK	1	1	CID		126.11	3.40126	0	1	2	1669.78	0.0718066	1520	1520	38.6776	MS2	20/26
	EKVIPSAEELTETR	1	1	CID		42.9164	3.26097	0	1	3	1601.84	0.669005	2264	2264	47.2221	MS2	25/52
	AEKPAPAPQPEQPAPAPK	1	1	CID		47.3772	3.26095	0	1	3	1823.97	0.0517781	526	526	26.6134	MS2	30/68
	LKEIDESDSEDYVK	1	1	CID		33.2862	3.23969	0	1	3	1669.78	0.851817	1583	1583	39.4163	MS2	27/52
	LEELSDKIDELDAEIAK	3	2	CID		43.2524	3.06512	0	1	3	1930.99	0.466837	4338	4338	73.2396	MS2	25/64
	LEELSDKIDELDAEIAK	3	2	CID		52.9	3.02522	0	1	2	1930.98	-2.32733	4092	4092	69.5827	MS2	9/32
	IAELENEVHR	1	1	CID		41.8051	2.98673	0	1	2	1209.62	-0.0413184	1222	1222	35.2255	MS2	16/18
	NSDGEYSALYLEAAEK	1	1	CID		109.423	2.82047	0	1	2	1759.8	-0.233818	2984	2984	55.9097	MS2	15/30
	LTQQQPPKAEKPAPAPQPEQPAPAPK	1	1	CID		17.5161	2.67902	0	1	3	2744.47	-0.685038	1059	1059	33.3687	MS2	23/100
	LEELSDKIDELDAEIAK	3	2	CID		21.8173	2.6753	0	1	3	1930.99	0.649942	4136	4136	70.2281	MS2	24/64
	IAELENEVHR	1	1	CID		63.6913	2.61615	0	2	3	1209.62	0.158858	1178	1178	34.7502	MS2	25/36
	DVEDFKNSDGEYSALYLEAAEK	1	1	CID		14.7216	2.49561	0	1	3	2493.13	-3.23988	5628	5628	97.8409	MS2	20/84
	DVEDFKNSDGEYSALYLEAAEKDLAAK	1	1	CID		28.5909	2.45514	0	1	3	2991.41	-0.755038	3980	3980	67.8901	MS2	20/104
	DVEDFKNSDGEYSALYLEAAEK	1	1	CID		97.3528	2.43383	0	1	2	2493.13	0.191533	3207	3207	58.5632	MS2	14/42
	AEKPAPAPQPEQPAPAPK	1	1	CID		48.1136	2.42347	0	1	2	1823.96	-3.90206	575	575	27.3049	MS2	15/34
	LEKDVEDFKNSDGEYSALYLEAAEKDLAAK	1	1	CID		15.6299	2.34963	0	1	4	3361.63	-1.33915	3835	3835	66.2082	MS2	28/174
	IDELDAEIAK	5	2	CID		24.8311	2.28779	0	1	2	1116.58	-1.4094	1958	1958	43.6648	MS2	15/18
	LEELSDKIDELDAEIAK	3	2	CID		20.2903	2.21479	0	1	3	1930.99	1.56547	4529	4529	76.2667	MS2	16/64
	NSDGEYSALYLEAAEK	1	1	CID		40.1947	2.17564	0	1	2	1759.8	0.498603	4541	4541	76.4447	MS2	12/30
	LEELSDKIDELDAEIAK	3	2	CID		37.7377	2.15939	0	1	3	1930.99	0.283731	3921	3921	67.1937	MS2	24/64
	TDDQQAEEDYAR	8	5	CID		94.2574	2.1205	0	1	2	1440.59	-1.91448	568	568	27.2247	MS2	14/22
	NSDGEYSALYLEAAEKDLAAK	1	1	CID		90.4507	2.06689	0	1	2	2258.08	0.664111	3744	3744	64.9162	MS2	15/40
	AEKPAPAPQPEQPAPAPK	1	1	CID		18.9479	2.06087	0	1	3	1823.97	0.7842	755	755	29.6286	MS2	22/68
	NSDGEYSALYLEAAEK	1	1	CID		58.2284	2.00548	0	1	2	1759.8	-1.57659	4332	4332	73.1227	MS2	10/30
	LKEIDESDSEDYVKEGLRAPLQSELDAK	1	1	CID		22.4076	1.99769	0	1	4	3177.58	0.797883	3227	3227	58.7801	MS2	25/162
	IAELENEVHRLETK	1	1	CID		29.0026	1.92134	0	1	2	1680.89	1.14649	2542	2542	50.4139	MS2	12/26
	LKEIDESDSEDYVK	1	1	CID		71.4711	1.77503	0	1	2	1669.79	4.83255	1786	1786	41.7026	MS2	13/26
	LKEIDESDSEDYVKEGLR	1	1	CID		5.70238	1.61157	0.217121	4	4	2125.03	2.00562	2239	2239	46.9213	MS2	27/102
	LTQQQPPKAEKPAPAPQPEQPAPAPK	1	1	CID		23.5333	1.59405	0	1	4	2744.47	0.400148	1034	1034	33.1211	MS2	37/150
	KASQEqqKANLDYqqK	1	1	CID	Q6(Deamidated) Q7(Deamidated) Q14(Deamidated) Q15(Deamidated)	8.79976	1.55882	0	1	2	1910.88	-16.9483	1458	1458	37.9612	MS2	8/30
	KASQEqQKAnLDYqqK	1	1	CID	Q6(Deamidated) N10(Deamidated) Q14(Deamidated) Q15(Deamidated)	8.79976	1.52614	0.0209665	2	2	1910.88	-16.9483	1458	1458	37.9612	MS2	9/30
	KASQEqqKAnLDYQqK	1	1	CID	Q6(Deamidated) Q7(Deamidated) N10(Deamidated) Q15(Deamidated)	8.79976	1.5002	0.0376091	3	2	1910.88	-16.9483	1458	1458	37.9612	MS2	7/30
	KASQEQqKAnLDYqqK	1	1	CID	Q7(Deamidated) N10(Deamidated) Q14(Deamidated) Q15(Deamidated)	8.79976	1.48754	0.045731	4	2	1910.88	-16.9483	1458	1458	37.9612	MS2	9/30
	NSDGEYSALYLEAAEK	1	1	CID		20.0552	1.48527	0	1	2	1759.8	2.08552	4099	4099	69.6757	MS2	8/30
	KASQEqqKAnLDYqQK	1	1	CID	Q6(Deamidated) Q7(Deamidated) N10(Deamidated) Q14(Deamidated)	3.55358	1.37275	0.119368	5	2	1910.88	-16.9483	1458	1458	37.9612	MS2	6/30
	NSDGEYSALYLEAAEK	1	1	CID		15.2643	1.36953	0	1	2	1759.79	-8.65667	5314	5314	91.2338	MS2	10/30
	IAELENEVHR	1	1	CID		11.0087	1.29428	0	1	3	1209.62	-0.665116	1713	1713	40.8633	MS2	14/36
	NSDGEYSALYLEAAEK	1	1	CID		29.665	1.2431	0	1	2	1759.8	1.47517	5715	5715	100.879	MS2	10/30
	EIDESDSEDYVK	1	1	CID		11.4017	1.11225	0	1	2	1428.6	-0.697764	1124	1124	34.106	MS2	5/22
	AKEVALQAKIAELENEVHRLETK	1	1	CID		16.4072	1.08791	0	1	5	2619.45	0.579514	4356	4356	73.5462	MS2	26/176
	DVEDFKNSDGEYSALYLEAAEK	1	1	CID		3.70228	0.866511	0	1	3	2493.14	5.73229	3172	3172	58.1403	MS2	11/84
	NSDGEYSALYLEAAEK	1	1	CID		3.21274	0.851894	0	1	2	1759.8	-0.233818	3532	3532	62.3888	MS2	3/30
	KRSMLQKEmEEAER	1	1	CID	M9(Oxidation)	5.40423	0.813375	0.59258	2	2	1780.86	-7.493	3412	3412	60.9737	MS2	5/26
	NSDGEYSALYLEAAEK	1	1	CID		3.18399	0.593303	0	1	2	1759.8	-2.43108	5150	5150	88.1139	MS2	7/30
	IAELENEVHRLETK	1	1	CID		8.05284	0.584722	0.11735	3	3	1680.89	1.19408	2680	2680	52.2182	MS2	12/52
	VIPSAEELTETR	1	1	CID		7.51539	0.51773	0.21645	3	2	1344.7	0.374033	2225	2225	46.7777	MS2	6/22
	IAELENEVHR	1	1	CID		2.54836	0.481326	0.185586	4	3	1209.62	0.616622	2006	2006	44.1684	MS2	6/36
gi225858942	24.19	54	1943	39.1763	immunoglobulin A1 protease [Streptococcus pneumoniae 70585]
	Sequence	# Proteins	# Protein Groups	Activation Type	Modifications	Probability	XCorr	Δ Score	Rank	Charge	MH+ [Da]	ΔM [ppm]	First Scan	Last Scan	RT [min]	MSOrder	Ions Matched	Annotation
	TEEVPVKPTEETPVNPNEGTTEGTSIQEAENPVQPAEESTTNSEK	5	1	CID		60.2829	4.04646	0	1	4	4824.23	0.176476	2378	2378	48.5506	MS2	38/264
	GVPEVQPALPEAVVTDK	2	2	CID		39.2653	2.96899	0	1	2	1748.94	-0.682959	3057	3057	56.808	MS2	13/32
	DVQSGAIVEPALQPELPEAVVSDK	1	1	CID		8.29222	2.65534	0	2	2	2491.29	1.47575	3808	3808	65.7859	MS2	13/46
	GEPEQVAPLPEYK	7	3	CID		68.7712	2.64465	0	1	2	1456.73	0.690244	1923	1923	43.2914	MS2	15/24
	GVPEVQPALPEAVVTDK	2	2	CID		61.412	2.63787	0	1	2	1748.94	-0.0726075	2813	2813	53.7948	MS2	14/32
	YGTKTINNVDELQKLMDEAVLQDATGTR	2	1	CID		16.1252	2.3449	0	1	3	3123.57	6.25361	4482	4482	75.4565	MS2	24/108
	DVQSGAIVEPALQPELPEAVVSDK	1	1	CID		2.92205	2.25372	0	2	3	2491.29	-0.979101	3681	3681	64.1693	MS2	22/92
	AEINPLTLPTVEPLSTSGK	2	1	CID		36.1499	2.07468	0	1	2	1967.07	-0.990186	3800	3800	65.6793	MS2	11/36
	GEPAIQPELPEAVVTDK	1	1	CID		45.0303	2.07403	0	1	2	1792.93	-0.644795	3116	3116	57.5748	MS2	14/32
	VSPDTSSENTGEVSSNPSDSTTSVGESNQPEK	1	1	CID		33.9621	2.07054	0	1	3	3253.41	-0.462284	1349	1349	36.7415	MS2	28/124
	DVQSGAIVEPALQPELPEAVVSDK	1	1	CID		12.6492	2.06776	0	2	2	2491.3	5.62614	3558	3558	62.7477	MS2	12/46
	GEPEQVAPLPEYK	7	3	CID		38.9546	2.05821	0	1	2	1456.73	0.0798925	2222	2222	46.7342	MS2	13/24
	GVPEVQPALPEAVVTDK	2	2	CID		34.7057	2.04789	0	1	2	1748.94	-1.78159	3436	3436	61.2199	MS2	9/32
	DPADGNEVYATNVVK	2	1	CID		30.0275	2.02374	0	1	2	1591.76	1.00056	1624	1624	39.8449	MS2	16/28
	GNIEQVKPETPVEK	7	3	CID		28.8842	1.95424	0	1	3	1567.83	0.350665	1345	1345	36.7056	MS2	15/52
	SDQTVGGLAGLVDQDAHIQNSYAEGDINNVK	2	1	CID		16.6119	1.89189	0	1	3	3228.54	-0.723261	4162	4162	70.5891	MS2	26/120
	GVPEVQPALPEAVVTDK	2	2	CID		41.4439	1.82545	0	1	2	1748.94	0.537744	3691	3691	64.2578	MS2	12/32
	GVPEVQPALPEAVVTDKGEPAIQPELPEAVVTDK	1	1	CID		8.21365	1.81026	0	1	3	3522.86	-1.4308	3863	3863	66.5283	MS2	20/132
	IDFQEEIQENPDLAEGTVR	9	4	CID		11.974	1.76705	0	1	3	2203.05	-0.259687	3166	3166	58.0756	MS2	18/72
	IDFQEEIQENPDLAEGTVR	9	4	CID		45.0404	1.71078	0	1	2	2203.05	-0.12417	3164	3164	58.0635	MS2	14/36
	YVKDPADGNEVYATNVVK	2	1	CID		12.6902	1.67125	0	1	2	1982	12.938	1783	1783	41.6716	MS2	12/34
	GVPEVQPALPEAVVTDKGEPAIQPELPEAVVTDK	1	1	CID		18.4394	1.65702	0	1	3	3522.86	-0.332167	4089	4089	69.5484	MS2	22/132
	EIVSTSTTAPIPR	4	3	CID		6.87313	1.59703	0	1	2	1371.75	-0.641318	1698	1698	40.7362	MS2	12/24
	GEPAIQPELPEAVVTDKGEPAVQPELPEAVVSDKGEPEQVAPLPEYK	1	1	CID		27.2621	1.58788	0	1	4	4976.54	10.1088	4044	4044	68.7906	MS2	31/276
	GEPAIQPELPEAVVTDKGEPAVQPELPEAVVSDK	1	1	CID		9.81274	1.58379	0	1	3	3538.82	0.610489	3728	3728	64.6965	MS2	22/132
	GEPAIQPELPEAVVTDK	1	1	CID		32.24	1.53499	0	1	2	1792.93	-1.25515	3378	3378	60.5953	MS2	10/32
	GVPEVQPALPEAVVTDK	2	2	CID		25.6303	1.48406	0	1	2	1748.94	-2.39194	4031	4031	68.5942	MS2	8/32
	IDFQEEIQENPDLAEGTVR	9	4	CID		3.00954	1.48293	0	1	3	2203.05	0.838946	3423	3423	61.0833	MS2	17/72
	TINNVDELQKLMDEAVLQDATGTR	2	1	CID		15.0356	1.38555	0	1	3	2674.33	-0.742421	4630	4630	77.8941	MS2	16/92
	IDFQEEIQENPDLAEGTVR	9	4	CID		3.86454	1.36076	0	1	3	2203.05	-0.992109	3707	3707	64.4606	MS2	14/72
	WYNFnYGQVnVKDLVMYHPDFFGK	3	1	CID	N5(Deamidated) N10(Deamidated)	6.32338	1.30532	0.318472	7	4	2983.39	16.4035	1856	1856	42.4997	MS2	27/138
	WYNFNYGqVnVKDLVMYHPDFFGK	3	1	CID	Q8(Deamidated) N10(Deamidated)	12.2139	1.27547	0.334056	8	4	2983.39	16.4035	1856	1856	42.4997	MS2	27/138
	VSPDTSSENTGEVSSNPSDSTTSVGESNQPEK	1	1	CID		13.5765	1.27456	0	1	3	3253.41	-3.02576	998	998	32.6452	MS2	16/124
	GTmLDASQIVSK	3	1	CID	M3(Oxidation)	8.96983	1.23155	0	1	2	1265.64	1.12493	1558	1558	39.1336	MS2	8/22
	QENELDPDKMVEEPEKK	1	1	CID		6.07202	1.14351	0	1	2	2057.98	6.43052	1745	1745	41.2114	MS2	6/32
	GEPAVQPELPEAVVSDK	2	2	CID		10.7176	1.12836	0	1	2	1764.9	1.60247	2541	2541	50.4079	MS2	9/32
	GEPAIQPELPEAVVTDK	1	1	CID		24.8351	1.08514	0	1	2	1792.93	0.697978	3634	3634	63.6164	MS2	8/32
	SDQTVGGLAGLVDQDAHIQNSYAEGDINNVK	2	1	CID		12.1857	1.06393	0.296752	3	3	3228.54	0.741583	3940	3940	67.4119	MS2	18/120
	GEPAVQPELPEAVVSDK	2	2	CID		15.1785	0.994707	0	1	2	1764.9	-0.228584	3048	3048	56.6951	MS2	7/32
	TGVNTLNPQDEVLSGQLNKPELLYR	12	6	CID		10.4475	0.990833	0	1	3	2798.47	0.189747	3613	3613	63.3723	MS2	11/96
	GEPAIQPELPEAVVTDKGEPAVQPELPEAVVSDK	1	1	CID		15.508	0.985381	0	1	3	3538.82	1.34291	3968	3968	67.7735	MS2	17/132
	LMDEAVLQDATGTR	2	1	CID		7.76359	0.956751	0	1	2	1519.74	-0.180342	2629	2629	51.5447	MS2	8/26
	EVLPELQK	3	1	CID		11.133	0.879656	0	1	2	955.546	0.146807	1867	1867	42.6173	MS2	7/14
	VFNVTLEKDEVVSK	3	1	CID		17.4792	0.869229	0	1	3	1606.87	-0.35998	2394	2394	48.7053	MS2	12/52
	GEPEQVAPLPEYK	7	3	CID		11.4847	0.811433	0	1	2	1456.73	-5.2912	2850	2850	54.2991	MS2	5/24
	GEPAIQPELPEAVVTDK	1	1	CID		14.7923	0.800735	0	1	2	1792.93	0.209697	2868	2868	54.5507	MS2	6/32
	NDIGSLANEATNGTK	3	1	CID		10.6612	0.777315	0	1	2	1504.72	-0.79124	2213	2213	46.615	MS2	6/28
	IDFQEEIQENPDLAEGTVR	9	4	CID		2.88723	0.730299	0	1	2	2203.06	4.27036	4134	4134	70.2004	MS2	9/36
	GNIEQVKPETPVEK	7	3	CID		26.1356	0.671873	0	1	3	1567.83	-0.198652	1088	1088	33.6968	MS2	14/52
	FGDDTTSGKATAEAKFDSSnPAmK	3	1	CID	N20(Deamidated) M23(Oxidation)	9.7919	0.670045	0	1	3	2493.13	22.3543	5718	5718	100.985	MS2	15/92
	NDIGSLANEATNGTK	3	1	CID		32.9984	0.639371	0	1	2	1504.72	-2.13401	1896	1896	42.9758	MS2	9/28
	VSPDTSSENTGEVSSNPSDSTTSVGESNQPEK	1	1	CID		2.88491	0.631248	0	1	3	3253.42	5.7633	1842	1842	42.3536	MS2	13/124
	LDYqSDAIRK	3	1	CID	Q4(Deamidated)	2.54836	0.482212	0.184088	2	3	1209.62	11.8606	2006	2006	44.1684	MS2	5/36
	KPLFENLSGATVEK	5	1	CID		4.89986	0.402708	0.315529	2	2	1532.83	-0.981084	2521	2521	50.1929	MS2	7/26
gi225854647	21.93	23	862	30.1345	pneumococcal histidine triad protein B [Streptococcus pneumoniae JJA]
	Sequence	# Proteins	# Protein Groups	Activation Type	Modifications	Probability	XCorr	Δ Score	Rank	Charge	MH+ [Da]	ΔM [ppm]	First Scan	Last Scan	RT [min]	MSOrder	Ions Matched	Annotation
	NGQADTNQTEKPNEEKPQTEKPEEDKEHDEVSEPTHPESDEK	3	2	CID		51.4326	4.72282	0	1	4	4830.14	0.756789	735	735	29.3647	MS2	36/246
	YYVEHPNERPHSDNGFGNASDHVQR	18	10	CID		91.5028	3.61674	0	1	4	2925.31	2.43038	1216	1216	35.1632	MS2	41/144
	FEWFDEGLYEAPK	25	11	CID		92.5042	3.56448	0	1	2	1630.74	0.13001	4157	4157	70.5067	MS2	21/24
	NGQADTNQTEKPNEEKPQTEKPEEDKEHDEVSEPTHPESDEK	3	2	CID		53.5258	3.44297	0	1	5	4830.14	-1.14875	982	982	32.423	MS2	52/328
	DLSAETAAGIDSK	21	9	CID		83.67	3.34527	0	1	2	1277.62	-0.147529	1579	1579	39.3661	MS2	19/24
	TNWVPSVSNPGTTNTNTSNNSNTNSQASQSNDIDSLLK	14	6	CID		41.0592	3.31508	0	1	3	4007.85	1.46943	3524	3524	62.3106	MS2	28/148
	NGQADTNQTEKPNEEKPQTEKPEEDKEHDEVSEPTHPESDEK	3	2	CID		31.1508	2.93838	0	1	5	4830.14	5.8703	738	738	29.3961	MS2	49/328
	NELSASELAAAEAFLSGR	14	6	CID		97.5789	2.82555	0	1	2	1835.91	0.140518	4642	4642	78.0521	MS2	17/34
	DLSAETAAGIDSK	21	9	CID		48.8255	2.36318	0	1	2	1277.62	0.218682	5692	5692	99.8728	MS2	16/24
	YYVEHPNERPHSDNGFGNASDHVQR	18	10	CID		48.3453	1.87333	0	1	3	2925.3	0.00242266	1192	1192	34.8892	MS2	22/96
	YYVEHPNERPHSDNGFGNASDHVQR	18	10	CID		40.1942	1.56481	0	1	6	2925.31	1.97624	1183	1183	34.7941	MS2	60/240
	VGDGYVFEENGVSR	17	8	CID		6.67014	1.51918	0	1	2	1527.71	-0.280381	2233	2233	46.8606	MS2	12/26
	VGDGYVFEENGVSR	17	8	CID		14.5188	1.50814	0	1	2	1527.71	3.38173	5671	5671	98.9607	MS2	11/26
	VGDGYVFEENGVSR	17	8	CID		7.57793	1.32934	0	1	2	1527.71	-1.0128	2495	2495	49.8883	MS2	9/26
	KVGDGYVFEENGVSR	17	8	CID		28.7462	1.15948	0	1	2	1655.8	-4.67421	1901	1901	43.0179	MS2	10/28
	VGDGYVFEENGVSR	17	8	CID		15.4249	0.995857	0	1	2	1527.71	-0.402451	2928	2928	55.2144	MS2	6/26
	DLSAETAAGIDSK	21	9	CID		17.0233	0.885607	0	1	2	1277.62	0.462822	5763	5763	102.891	MS2	8/24
	VGDGYVFEENGVSR	17	8	CID		7.05413	0.883211	0	1	2	1527.7	-6.87218	4108	4108	69.819	MS2	4/26
	NDGAVALARSqGR	12	5	CID	Q11(Deamidated)	3.62982	0.84222	0.0470723	2	2	1315.67	2.74256	1646	1646	40.0841	MS2	9/24
	DLSAETAAGIDSK	21	9	CID		10.7358	0.686844	0	1	2	1277.62	-0.39167	5583	5583	96.8355	MS2	6/24
	DLSAETAAGIDSK	21	9	CID		7.71471	0.668767	0	1	2	1277.62	-4.41999	4171	4171	70.7329	MS2	5/24
	MPYNLQYTVEVK	24	11	CID		2.58458	0.496205	0.000760808	2	2	1484.75	-0.134443	2956	2956	55.5675	MS2	4/22
	YYVEHPNERPHSDNGFGNASDHVQR	18	10	CID		13.8561	0.461398	0.37343	4	5	2925.3	0.158635	1180	1180	34.7621	MS2	32/192
gi225858961	26.55	29	840	30.1258	pneumococcal histidine triad protein B [Streptococcus pneumoniae 70585]
	Sequence	# Proteins	# Protein Groups	Activation Type	Modifications	Probability	XCorr	Δ Score	Rank	Charge	MH+ [Da]	ΔM [ppm]	First Scan	Last Scan	RT [min]	MSOrder	Ions Matched	Annotation
	YYVEHPNERPHSDNGFGNASDHVQR	18	10	CID		91.5028	3.61674	0	1	4	2925.31	2.43038	1216	1216	35.1632	MS2	41/144
	FEWFDEGLYEAPK	25	11	CID		92.5042	3.56448	0	1	2	1630.74	0.13001	4157	4157	70.5067	MS2	21/24
	DLSAETAAGIDSK	21	9	CID		83.67	3.34527	0	1	2	1277.62	-0.147529	1579	1579	39.3661	MS2	19/24
	TNWVPSVSNPGTTNTNTSNNSNTNSQASQSNDIDSLLK	14	6	CID		41.0592	3.31508	0	1	3	4007.85	1.46943	3524	3524	62.3106	MS2	28/148
	NKNGQADTNQTEKPSEEKPQTEKPEEETPR	5	4	CID		30.3212	3.11548	0	1	4	3439.62	-1.90204	523	523	26.5533	MS2	33/174
	NELSASELAAAEAFLSGR	14	6	CID		97.5789	2.82555	0	1	2	1835.91	0.140518	4642	4642	78.0521	MS2	17/34
	NGQADTNQTEKPSEEKPQTEKPEEETPR	5	4	CID		22.8653	2.41366	0	1	3	3197.48	-0.890448	582	582	27.3827	MS2	24/108
	EEKPQSEKPESPKPTEEPEEESPEESEEPQVETEKVEEK	5	3	CID		42.7868	2.40773	0	1	4	4537.07	3.76429	1390	1390	37.1824	MS2	32/228
	DLSAETAAGIDSK	21	9	CID		48.8255	2.36318	0	1	2	1277.62	0.218682	5692	5692	99.8728	MS2	16/24
	NGQADTNQTEKPSEEKPQTEKPEEETPR	5	4	CID		37.8751	2.34626	0	1	4	3197.48	-1.69735	580	580	27.3703	MS2	37/162
	YYVEHPNERPHSDNGFGNASDHVQR	18	10	CID		48.3453	1.87333	0	1	3	2925.3	0.00242266	1192	1192	34.8892	MS2	22/96
	EEKPQSEKPESPKPTEEPEEESPEESEEPQVETEK	5	3	CID		15.5532	1.86277	0	1	4	4051.82	3.57499	1196	1196	34.9267	MS2	29/204
	YYVEHPNERPHSDNGFGNASDHVQR	18	10	CID		40.1942	1.56481	0	1	6	2925.31	1.97624	1183	1183	34.7941	MS2	60/240
	VGDGYVFEENGVSR	17	8	CID		6.67014	1.51918	0	1	2	1527.71	-0.280381	2233	2233	46.8606	MS2	12/26
	VGDGYVFEENGVSR	17	8	CID		14.5188	1.50814	0	1	2	1527.71	3.38173	5671	5671	98.9607	MS2	11/26
	NGQADTNQTEKPSEEKPQTEKPEEETPR	5	4	CID		3.66281	1.4691	0	1	4	3197.49	7.82413	817	817	30.3902	MS2	30/162
	QVDFEALDNLLER	21	8	CID		53.0375	1.42484	0	1	2	1561.78	-0.781592	4655	4655	78.2595	MS2	14/24
	VGDGYVFEENGVSR	17	8	CID		7.57793	1.32934	0	1	2	1527.71	-1.0128	2495	2495	49.8883	MS2	9/26
	AYDLLAR	21	9	CID		26.4635	1.27348	0	1	2	821.455	3.33132	1931	1931	43.351	MS2	9/12
	KVGDGYVFEENGVSR	17	8	CID		28.7462	1.15948	0	1	2	1655.8	-4.67421	1901	1901	43.0179	MS2	10/28
	VGDGYVFEENGVSR	17	8	CID		15.4249	0.995857	0	1	2	1527.71	-0.402451	2928	2928	55.2144	MS2	6/26
	NGQADTNQTEKPSEEKPQTEKPEEETPR	5	4	CID		12.5317	0.896709	0.341624	10	5	3197.49	3.35512	584	584	27.4268	MS2	37/216
	DLSAETAAGIDSK	21	9	CID		17.0233	0.885607	0	1	2	1277.62	0.462822	5763	5763	102.891	MS2	8/24
	VGDGYVFEENGVSR	17	8	CID		7.05413	0.883211	0	1	2	1527.7	-6.87218	4108	4108	69.819	MS2	4/26
	DLSAETAAGIDSK	21	9	CID		10.7358	0.686844	0	1	2	1277.62	-0.39167	5583	5583	96.8355	MS2	6/24
	DLSAETAAGIDSK	21	9	CID		7.71471	0.668767	0	1	2	1277.62	-4.41999	4171	4171	70.7329	MS2	5/24
	EEKPQSEKPESPKPTEEPEEESPEESEEPQVETEKVEEK	5	3	CID		21.1551	0.538261	0	1	5	4537.06	1.18737	1427	1427	37.621	MS2	46/304
	MPYNLQYTVEVK	24	11	CID		2.58458	0.496205	0.000760808	2	2	1484.75	-0.134443	2956	2956	55.5675	MS2	4/22
	YYVEHPNERPHSDNGFGNASDHVQR	18	10	CID		13.8561	0.461398	0.37343	4	5	2925.3	0.158635	1180	1180	34.7621	MS2	32/192
gi225858796	20.52	25	853	29.4197	pneumococcal histidine triad protein B [Streptococcus pneumoniae 70585]
	Sequence	# Proteins	# Protein Groups	Activation Type	Modifications	Probability	XCorr	Δ Score	Rank	Charge	MH+ [Da]	ΔM [ppm]	First Scan	Last Scan	RT [min]	MSOrder	Ions Matched	Annotation
	NGQADTNQTEKPNEEKPQTEKPEEDKEHDEVSEPTHPESDEK	3	2	CID		51.4326	4.72282	0	1	4	4830.14	0.756789	735	735	29.3647	MS2	36/246
	YYVEHPNERPHSDNGFGNASDHVQR	18	10	CID		91.5028	3.61674	0	1	4	2925.31	2.43038	1216	1216	35.1632	MS2	41/144
	FEWFDEGLYEAPK	25	11	CID		92.5042	3.56448	0	1	2	1630.74	0.13001	4157	4157	70.5067	MS2	21/24
	NGQADTNQTEKPNEEKPQTEKPEEDKEHDEVSEPTHPESDEK	3	2	CID		53.5258	3.44297	0	1	5	4830.14	-1.14875	982	982	32.423	MS2	52/328
	DLSAETAAGIDSK	21	9	CID		83.67	3.34527	0	1	2	1277.62	-0.147529	1579	1579	39.3661	MS2	19/24
	IAEAEALLEK	5	2	CID		54.2055	3.20913	0	1	2	1086.6	0.480557	2219	2219	46.7048	MS2	16/18
	NGQADTNQTEKPNEEKPQTEKPEEDKEHDEVSEPTHPESDEK	3	2	CID		31.1508	2.93838	0	1	5	4830.14	5.8703	738	738	29.3961	MS2	49/328
	DLSAETAAGIDSK	21	9	CID		48.8255	2.36318	0	1	2	1277.62	0.218682	5692	5692	99.8728	MS2	16/24
	NELSASELAAAEAYWNGK	7	4	CID		49.4058	2.21673	0	2	2	1923.91	1.70048	3878	3878	66.694	MS2	15/34
	YYVEHPNERPHSDNGFGNASDHVQR	18	10	CID		48.3453	1.87333	0	1	3	2925.3	0.00242266	1192	1192	34.8892	MS2	22/96
	YYVEHPNERPHSDNGFGNASDHVQR	18	10	CID		40.1942	1.56481	0	1	6	2925.31	1.97624	1183	1183	34.7941	MS2	60/240
	VGDGYVFEENGVSR	17	8	CID		6.67014	1.51918	0	1	2	1527.71	-0.280381	2233	2233	46.8606	MS2	12/26
	VGDGYVFEENGVSR	17	8	CID		14.5188	1.50814	0	1	2	1527.71	3.38173	5671	5671	98.9607	MS2	11/26
	QVDFEALDNLLER	21	8	CID		53.0375	1.42484	0	1	2	1561.78	-0.781592	4655	4655	78.2595	MS2	14/24
	VGDGYVFEENGVSR	17	8	CID		7.57793	1.32934	0	1	2	1527.71	-1.0128	2495	2495	49.8883	MS2	9/26
	AYDLLAR	21	9	CID		26.4635	1.27348	0	1	2	821.455	3.33132	1931	1931	43.351	MS2	9/12
	IAEAEALLEKVTDSSIR	5	2	CID		4.21535	1.18944	0	1	3	1845	0.0128133	4188	4188	71.0023	MS2	14/64
	KVGDGYVFEENGVSR	17	8	CID		28.7462	1.15948	0	1	2	1655.8	-4.67421	1901	1901	43.0179	MS2	10/28
	VGDGYVFEENGVSR	17	8	CID		15.4249	0.995857	0	1	2	1527.71	-0.402451	2928	2928	55.2144	MS2	6/26
	DLSAETAAGIDSK	21	9	CID		17.0233	0.885607	0	1	2	1277.62	0.462822	5763	5763	102.891	MS2	8/24
	VGDGYVFEENGVSR	17	8	CID		7.05413	0.883211	0	1	2	1527.7	-6.87218	4108	4108	69.819	MS2	4/26
	DLSAETAAGIDSK	21	9	CID		10.7358	0.686844	0	1	2	1277.62	-0.39167	5583	5583	96.8355	MS2	6/24
	DLSAETAAGIDSK	21	9	CID		7.71471	0.668767	0	1	2	1277.62	-4.41999	4171	4171	70.7329	MS2	5/24
	MPYNLQYTVEVK	24	11	CID		2.58458	0.496205	0.000760808	2	2	1484.75	-0.134443	2956	2956	55.5675	MS2	4/22
	YYVEHPNERPHSDNGFGNASDHVQR	18	10	CID		13.8561	0.461398	0.37343	4	5	2925.3	0.158635	1180	1180	34.7621	MS2	32/192
gi307128455	3.33	9	932	24.7944	surface protein PspC [Streptococcus pneumoniae 670-6B]
	Sequence	# Proteins	# Protein Groups	Activation Type	Modifications	Probability	XCorr	Δ Score	Rank	Charge	MH+ [Da]	ΔM [ppm]	First Scan	Last Scan	RT [min]	MSOrder	Ions Matched	Annotation
	LSKLEELSDKIDELDAEIAK	3	2	CID		100.97	5.4939	0	1	3	2259.2	0.273302	4450	4450	74.9143	MS2	34/76
	LEELSDKIDELDAEIAK	3	2	CID		99.2049	3.87287	0	1	2	1930.98	-0.86249	3841	3841	66.3064	MS2	23/32
	LEELSDKIDELDAEIAK	3	2	CID		43.2524	3.06512	0	1	3	1930.99	0.466837	4338	4338	73.2396	MS2	25/64
	LEELSDKIDELDAEIAK	3	2	CID		52.9	3.02522	0	1	2	1930.98	-2.32733	4092	4092	69.5827	MS2	9/32
	LEELSDKIDELDAEIAK	3	2	CID		21.8173	2.6753	0	1	3	1930.99	0.649942	4136	4136	70.2281	MS2	24/64
	IDELDAEIAK	5	2	CID		24.8311	2.28779	0	1	2	1116.58	-1.4094	1958	1958	43.6648	MS2	15/18
	LEELSDKIDELDAEIAK	3	2	CID		20.2903	2.21479	0	1	3	1930.99	1.56547	4529	4529	76.2667	MS2	16/64
	LEELSDKIDELDAEIAK	3	2	CID		37.7377	2.15939	0	1	3	1930.99	0.283731	3921	3921	67.1937	MS2	24/64
	EGLEKTTAEKK	2	2	CID		5.68458	0.539843	0	1	2	1233.67	6.03685	3371	3371	60.5118	MS2	5/20
gi182683050	22.8	20	1136	24.4657	cell wall surface anchor family protein [Streptococcus pneumoniae CGSP14]
	Sequence	# Proteins	# Protein Groups	Activation Type	Modifications	Probability	XCorr	Δ Score	Rank	Charge	MH+ [Da]	ΔM [ppm]	First Scan	Last Scan	RT [min]	MSOrder	Ions Matched	Annotation
	TEVSEETSPSSLDTLFEK	3	1	CID		85.9715	3.03783	0	1	2	1998.94	-0.547139	3467	3467	61.5709	MS2	17/34
	TEVSEETSPSSLDTLFEKDEEAQKNPELTDVLK	3	1	CID		61.8908	2.88467	0	1	3	3708.79	2.44018	3930	3930	67.293	MS2	21/128
	TEVSEETSPSSLDTLFEK	3	1	CID		28.235	2.71631	0	1	2	1998.94	-1.27956	3973	3973	67.8176	MS2	12/34
	DEEAQKNPELTDVLK	9	1	CID		51.2428	2.62146	0	1	2	1728.86	-0.937959	2276	2276	47.3295	MS2	10/28
	EGDLSEKPGDTVLTQAKPEGVTGNTNSLPTPTER	11	1	CID		45.394	2.40935	0	1	3	3538.75	-0.449902	2443	2443	49.2416	MS2	27/132
	TEVSEETSPSSLDTLFEK	3	1	CID		78.0063	2.32831	0	1	2	1998.94	-1.15749	3717	3717	64.578	MS2	18/34
	EGDLSEKPGDTVLTQAKPEGVTGNTNSLPTPTER	11	1	CID		63.6029	2.22192	0	1	3	3538.75	1.01494	2683	2683	52.266	MS2	31/132
	EGDLSEKPGDTVLTQAKPEGVTGNTNSLPTPTER	11	1	CID		13.7721	2.15715	0	1	3	3538.76	5.77568	3099	3099	57.332	MS2	21/132
	ETVDTADVDGTQASPAETTPEQVK	11	1	CID		35.5731	2.14405	0	1	2	2489.15	-1.51065	1546	1546	38.9502	MS2	15/46
	TEVSEETSPSSLDTLFEK	3	1	CID		3.71239	1.94463	0	1	2	1998.94	-2.01198	4280	4280	72.3149	MS2	7/34
	GqYFYqLALDGNVAGK	6	1	CID	Q2(Deamidated) Q6(Deamidated)	3.94278	1.67219	0	1	4	1745.85	13.3078	1061	1061	33.3809	MS2	22/90
	EGDLSEKPGDTVLTQAKPEGVTGNTNSLPTPTER	11	1	CID		14.2894	1.58929	0.141141	4	4	3538.76	5.82327	4493	4493	75.6618	MS2	34/198
	EGDLSEKPGDTVLTQAKPEGVTGNTNSLPTPTER	11	1	CID		11.2491	1.48318	0	1	4	3538.76	9.97366	4295	4295	72.5849	MS2	32/198
	EGDLSEKPGDTVLTQAKPEGVTGNTNSLPTPTER	11	1	CID		26.83	1.26765	0.183907	3	4	3538.75	1.1846	2360	2360	48.3668	MS2	29/198
	DEEAQKNPELTDVLK	9	1	CID		10.7402	1.19739	0	1	3	1728.87	2.40553	2436	2436	49.1523	MS2	14/56
	TEVSEETSPSSLDTLFEK	3	1	CID		15.1637	1.13945	0	1	2	1998.94	-2.62233	4516	4516	76.0327	MS2	8/34
	NPELTDVLK	9	1	CID		2.76767	1.08004	0	1	2	1028.56	-0.974404	2357	2357	48.3377	MS2	10/16
	EGDLSEKPGDTVLTQAKPEGVTGNTNSLPTPTER	11	1	CID		26.727	0.947207	0.331746	7	4	3538.75	-4.18649	3639	3639	63.6762	MS2	26/198
	KVTININGLISK	9	1	CID		4.37058	0.694553	0	1	2	1299.79	-12.9747	3528	3528	62.3657	MS2	4/22
	DSIDVPAAYLEK	11	1	CID		6.25939	0.587204	0	1	2	1320.67	0.761611	2740	2740	52.945	MS2	7/22
gi221231885	23.21	18	840	24.4174	streptococcal histidine triad protein PhpA [Streptococcus pneumoniae ATCC 700669]
	Sequence	# Proteins	# Protein Groups	Activation Type	Modifications	Probability	XCorr	Δ Score	Rank	Charge	MH+ [Da]	ΔM [ppm]	First Scan	Last Scan	RT [min]	MSOrder	Ions Matched	Annotation
	YYVEHPNERPHSDNGFGNASDHVQR	18	10	CID		91.5028	3.61674	0	1	4	2925.31	2.43038	1216	1216	35.1632	MS2	41/144
	FEWFDEGLYEAPK	25	11	CID		92.5042	3.56448	0	1	2	1630.74	0.13001	4157	4157	70.5067	MS2	21/24
	TNWVPSVSNPGTTNTNTSNNSNTNSQASQSNDIDSLLK	14	6	CID		41.0592	3.31508	0	1	3	4007.85	1.46943	3524	3524	62.3106	MS2	28/148
	NKNGQADTNQTEKPSEEKPQTEKPEEETPR	5	4	CID		30.3212	3.11548	0	1	4	3439.62	-1.90204	523	523	26.5533	MS2	33/174
	NELSASELAAAEAFLSGR	14	6	CID		97.5789	2.82555	0	1	2	1835.91	0.140518	4642	4642	78.0521	MS2	17/34
	NGQADTNQTEKPSEEKPQTEKPEEETPR	5	4	CID		22.8653	2.41366	0	1	3	3197.48	-0.890448	582	582	27.3827	MS2	24/108
	EEKPQSEKPESPKPTEEPEEESPEESEEPQVETEKVEEK	5	3	CID		42.7868	2.40773	0	1	4	4537.07	3.76429	1390	1390	37.1824	MS2	32/228
	NGQADTNQTEKPSEEKPQTEKPEEETPR	5	4	CID		37.8751	2.34626	0	1	4	3197.48	-1.69735	580	580	27.3703	MS2	37/162
	YYVEHPNERPHSDNGFGNASDHVQR	18	10	CID		48.3453	1.87333	0	1	3	2925.3	0.00242266	1192	1192	34.8892	MS2	22/96
	EEKPQSEKPESPKPTEEPEEESPEESEEPQVETEK	5	3	CID		15.5532	1.86277	0	1	4	4051.82	3.57499	1196	1196	34.9267	MS2	29/204
	YYVEHPNERPHSDNGFGNASDHVQR	18	10	CID		40.1942	1.56481	0	1	6	2925.31	1.97624	1183	1183	34.7941	MS2	60/240
	NGQADTNQTEKPSEEKPQTEKPEEETPR	5	4	CID		3.66281	1.4691	0	1	4	3197.49	7.82413	817	817	30.3902	MS2	30/162
	AYDLLAR	21	9	CID		26.4635	1.27348	0	1	2	821.455	3.33132	1931	1931	43.351	MS2	9/12
	NGQADTNQTEKPSEEKPQTEKPEEETPR	5	4	CID		12.5317	0.896709	0.341624	10	5	3197.49	3.35512	584	584	27.4268	MS2	37/216
	NDGAVALARSqGR	12	5	CID	Q11(Deamidated)	3.62982	0.84222	0.0470723	2	2	1315.67	2.74256	1646	1646	40.0841	MS2	9/24
	EEKPQSEKPESPKPTEEPEEESPEESEEPQVETEKVEEK	5	3	CID		21.1551	0.538261	0	1	5	4537.06	1.18737	1427	1427	37.621	MS2	46/304
	MPYNLQYTVEVK	24	11	CID		2.58458	0.496205	0.000760808	2	2	1484.75	-0.134443	2956	2956	55.5675	MS2	4/22
	YYVEHPNERPHSDNGFGNASDHVQR	18	10	CID		13.8561	0.461398	0.37343	4	5	2925.3	0.158635	1180	1180	34.7621	MS2	32/192
gi15901039	17.83	25	819	23.7942	hypothetical protein SP_1174 [Streptococcus pneumoniae TIGR4]
	Sequence	# Proteins	# Protein Groups	Activation Type	Modifications	Probability	XCorr	Δ Score	Rank	Charge	MH+ [Da]	ΔM [ppm]	First Scan	Last Scan	RT [min]	MSOrder	Ions Matched	Annotation
	YYVEHPNERPHSDNGFGNASDHVQR	18	10	CID		91.5028	3.61674	0	1	4	2925.31	2.43038	1216	1216	35.1632	MS2	41/144
	FEWFDEGLYEAPK	25	11	CID		92.5042	3.56448	0	1	2	1630.74	0.13001	4157	4157	70.5067	MS2	21/24
	DLSAETAAGIDSK	21	9	CID		83.67	3.34527	0	1	2	1277.62	-0.147529	1579	1579	39.3661	MS2	19/24
	NKNGQADTNQTEKPSEEKPQTEKPEEETPR	5	4	CID		30.3212	3.11548	0	1	4	3439.62	-1.90204	523	523	26.5533	MS2	33/174
	NGQADTNQTEKPSEEKPQTEKPEEETPR	5	4	CID		22.8653	2.41366	0	1	3	3197.48	-0.890448	582	582	27.3827	MS2	24/108
	DLSAETAAGIDSK	21	9	CID		48.8255	2.36318	0	1	2	1277.62	0.218682	5692	5692	99.8728	MS2	16/24
	NGQADTNQTEKPSEEKPQTEKPEEETPR	5	4	CID		37.8751	2.34626	0	1	4	3197.48	-1.69735	580	580	27.3703	MS2	37/162
	NELSASELAAAEAYWNGK	7	4	CID		49.4058	2.21673	0	2	2	1923.91	1.70048	3878	3878	66.694	MS2	15/34
	YYVEHPNERPHSDNGFGNASDHVQR	18	10	CID		48.3453	1.87333	0	1	3	2925.3	0.00242266	1192	1192	34.8892	MS2	22/96
	YYVEHPNERPHSDNGFGNASDHVQR	18	10	CID		40.1942	1.56481	0	1	6	2925.31	1.97624	1183	1183	34.7941	MS2	60/240
	VGDGYVFEENGVSR	17	8	CID		6.67014	1.51918	0	1	2	1527.71	-0.280381	2233	2233	46.8606	MS2	12/26
	VGDGYVFEENGVSR	17	8	CID		14.5188	1.50814	0	1	2	1527.71	3.38173	5671	5671	98.9607	MS2	11/26
	NGQADTNQTEKPSEEKPQTEKPEEETPR	5	4	CID		3.66281	1.4691	0	1	4	3197.49	7.82413	817	817	30.3902	MS2	30/162
	QVDFEALDNLLER	21	8	CID		53.0375	1.42484	0	1	2	1561.78	-0.781592	4655	4655	78.2595	MS2	14/24
	VGDGYVFEENGVSR	17	8	CID		7.57793	1.32934	0	1	2	1527.71	-1.0128	2495	2495	49.8883	MS2	9/26
	AYDLLAR	21	9	CID		26.4635	1.27348	0	1	2	821.455	3.33132	1931	1931	43.351	MS2	9/12
	KVGDGYVFEENGVSR	17	8	CID		28.7462	1.15948	0	1	2	1655.8	-4.67421	1901	1901	43.0179	MS2	10/28
	VGDGYVFEENGVSR	17	8	CID		15.4249	0.995857	0	1	2	1527.71	-0.402451	2928	2928	55.2144	MS2	6/26
	NGQADTNQTEKPSEEKPQTEKPEEETPR	5	4	CID		12.5317	0.896709	0.341624	10	5	3197.49	3.35512	584	584	27.4268	MS2	37/216
	DLSAETAAGIDSK	21	9	CID		17.0233	0.885607	0	1	2	1277.62	0.462822	5763	5763	102.891	MS2	8/24
	VGDGYVFEENGVSR	17	8	CID		7.05413	0.883211	0	1	2	1527.7	-6.87218	4108	4108	69.819	MS2	4/26
	DLSAETAAGIDSK	21	9	CID		10.7358	0.686844	0	1	2	1277.62	-0.39167	5583	5583	96.8355	MS2	6/24
	DLSAETAAGIDSK	21	9	CID		7.71471	0.668767	0	1	2	1277.62	-4.41999	4171	4171	70.7329	MS2	5/24
	MPYNLQYTVEVK	24	11	CID		2.58458	0.496205	0.000760808	2	2	1484.75	-0.134443	2956	2956	55.5675	MS2	4/22
	YYVEHPNERPHSDNGFGNASDHVQR	18	10	CID		13.8561	0.461398	0.37343	4	5	2925.3	0.158635	1180	1180	34.7621	MS2	32/192
gi307067282	11.39	15	1887	21.3498	hypothetical protein SPAP_0653 [Streptococcus pneumoniae AP200]
	Sequence	# Proteins	# Protein Groups	Activation Type	Modifications	Probability	XCorr	Δ Score	Rank	Charge	MH+ [Da]	ΔM [ppm]	First Scan	Last Scan	RT [min]	MSOrder	Ions Matched	Annotation
	TLGLDTVLEETSAKPGEVTVVEVETPQSTTNQEQAR	8	6	CID		131.24	4.57728	0	1	3	3856.93	1.00209	3994	3994	68.0843	MS2	38/140
	LAITNIEEVTEEETSLFK	2	2	CID		69.4995	4.21073	0	1	2	2066.06	1.9045	4770	4770	80.2548	MS2	20/34
	VEEGKEDSAEPAPVEEVGGEVESKPEEK	10	9	CID		81.8654	3.51272	0	1	3	2983.39	1.35649	1816	1816	42.0263	MS2	26/108
	EVTVEENNLQATLDNLK	2	2	CID		36.2649	2.99347	0	1	2	1929.98	-0.949834	3606	3606	63.3013	MS2	13/32
	GTQEEDYVGEALVPEQLPEYK	2	2	CID		37.4548	1.98778	0	1	2	2394.13	-0.740498	3514	3514	62.1733	MS2	13/40
	VEEGKEDSAEPAPVEEVGGEVESKPEEK	10	9	CID		64.8693	1.91528	0	1	4	2983.39	2.07546	1856	1856	42.4997	MS2	51/162
	VTEGTLVEESTTELDYK	2	2	CID		4.62892	1.91161	0	1	2	1913.92	-0.514561	5501	5501	95.1132	MS2	12/32
	TETTEDPTKYTDEETVLR	3	3	CID		43.7011	1.44188	0	1	2	2128	2.76177	2075	2075	44.9181	MS2	11/34
	VTEGTLVEESTTELDYK	2	2	CID		59.5504	1.38988	0	1	2	1913.93	4.00204	2916	2916	55.0528	MS2	6/32
	TETTEDPTKYTDEETVLR	3	3	CID		12.2594	1.24627	0	1	3	2127.99	0.978302	2074	2074	44.9119	MS2	17/68
	QVTQEGVNDKKQITETYKTIR	2	2	CID		6.12	1.06046	0	1	2	2479.3	-12.3993	3855	3855	66.4343	MS2	7/40
	LVENEDHQLNTDEAAKR	2	2	CID		22.5561	0.948189	0	1	3	1981.95	-2.47109	858	858	30.8674	MS2	17/64
	LDDAGIMTNVAFIGKVQSVGDK	2	2	CID		3.08616	0.886215	0.537232	3	3	2278.17	-3.7756	4074	4074	69.3553	MS2	12/84
	VTEGTLVEESTTELDYK	2	2	CID		36.3744	0.878182	0	1	2	1913.93	4.00204	3282	3282	59.4913	MS2	7/32
	VTEGTLVEESTTELDYK	2	2	CID		3.6423	0.487489	0	1	2	1913.92	-0.0262794	5657	5657	98.4813	MS2	9/32
gi225858492	11.4	16	1895	21.2267	zinc metalloprotease ZmpB [Streptococcus pneumoniae 70585]
	Sequence	# Proteins	# Protein Groups	Activation Type	Modifications	Probability	XCorr	Δ Score	Rank	Charge	MH+ [Da]	ΔM [ppm]	First Scan	Last Scan	RT [min]	MSOrder	Ions Matched	Annotation
	LAITNIEEVTEEETSLFK	2	2	CID		69.4995	4.21073	0	1	2	2066.06	1.9045	4770	4770	80.2548	MS2	20/34
	VEEGKEDSAEPAPVEEVGGEVESKPEEK	10	9	CID		81.8654	3.51272	0	1	3	2983.39	1.35649	1816	1816	42.0263	MS2	26/108
	EVTVEENNLQATLDNLK	2	2	CID		36.2649	2.99347	0	1	2	1929.98	-0.949834	3606	3606	63.3013	MS2	13/32
	TIGGVETDQVLSTSTEVTK	1	1	CID		130.116	2.79305	0	1	2	1965	1.36841	2550	2550	50.5022	MS2	17/36
	GTQEEDYVGEALVPEQLPEYK	2	2	CID		37.4548	1.98778	0	1	2	2394.13	-0.740498	3514	3514	62.1733	MS2	13/40
	VEEGKEDSAEPAPVEEVGGEVESKPEEK	10	9	CID		64.8693	1.91528	0	1	4	2983.39	2.07546	1856	1856	42.4997	MS2	51/162
	VTEGTLVEESTTELDYK	2	2	CID		4.62892	1.91161	0	1	2	1913.92	-0.514561	5501	5501	95.1132	MS2	12/32
	VPEQPVQPTQAEQPSTPK	3	3	CID		21.8213	1.66114	0	1	2	1960.99	-3.95343	1302	1302	36.2674	MS2	9/34
	TETTEDPTKYTDEETVLR	3	3	CID		43.7011	1.44188	0	1	2	2128	2.76177	2075	2075	44.9181	MS2	11/34
	VTEGTLVEESTTELDYK	2	2	CID		59.5504	1.38988	0	1	2	1913.93	4.00204	2916	2916	55.0528	MS2	6/32
	TETTEDPTKYTDEETVLR	3	3	CID		12.2594	1.24627	0	1	3	2127.99	0.978302	2074	2074	44.9119	MS2	17/68
	QVTQEGVNDKKQITETYKTIR	2	2	CID		6.12	1.06046	0	1	2	2479.3	-12.3993	3855	3855	66.4343	MS2	7/40
	LVENEDHQLNTDEAAKR	2	2	CID		22.5561	0.948189	0	1	3	1981.95	-2.47109	858	858	30.8674	MS2	17/64
	LDDAGIMTNVAFIGKVQSVGDK	2	2	CID		3.08616	0.886215	0.537232	3	3	2278.17	-3.7756	4074	4074	69.3553	MS2	12/84
	VTEGTLVEESTTELDYK	2	2	CID		36.3744	0.878182	0	1	2	1913.93	4.00204	3282	3282	59.4913	MS2	7/32
	VTEGTLVEESTTELDYK	2	2	CID		3.6423	0.487489	0	1	2	1913.92	-0.0262794	5657	5657	98.4813	MS2	9/32
gi194397660	23.33	28	840	19.0303	histidine triad protein PhtA/B [Streptococcus pneumoniae G54]
	Sequence	# Proteins	# Protein Groups	Activation Type	Modifications	Probability	XCorr	Δ Score	Rank	Charge	MH+ [Da]	ΔM [ppm]	First Scan	Last Scan	RT [min]	MSOrder	Ions Matched	Annotation
	YYVEHPNERPHSDNGFGNASDHVQR	18	10	CID		91.5028	3.61674	0	1	4	2925.31	2.43038	1216	1216	35.1632	MS2	41/144
	FEWFDEGLYEAPK	25	11	CID		92.5042	3.56448	0	1	2	1630.74	0.13001	4157	4157	70.5067	MS2	21/24
	DLSAETAAGIDSK	21	9	CID		83.67	3.34527	0	1	2	1277.62	-0.147529	1579	1579	39.3661	MS2	19/24
	TNWVPSVSNPGTTNTNTSNNSNTNSQASQSNDIDSLLK	14	6	CID		41.0592	3.31508	0	1	3	4007.85	1.46943	3524	3524	62.3106	MS2	28/148
	NELSASELAAAEAFLSGR	14	6	CID		97.5789	2.82555	0	1	2	1835.91	0.140518	4642	4642	78.0521	MS2	17/34
	DLSAETAAGIDSK	21	9	CID		48.8255	2.36318	0	1	2	1277.62	0.218682	5692	5692	99.8728	MS2	16/24
	SnHWVPDSRPEQPSPQPTPEPSPSPQPVPNPQPAPSNPIDEK	1	1	CID	N2(Deamidated)	11.0166	2.12878	0	1	4	4560.14	-28.683	2212	2212	46.609	MS2	32/246
	YYVEHPNERPHSDNGFGNASDHVQR	18	10	CID		48.3453	1.87333	0	1	3	2925.3	0.00242266	1192	1192	34.8892	MS2	22/96
	YYVEHPNERPHSDNGFGNASDHVQR	18	10	CID		40.1942	1.56481	0	1	6	2925.31	1.97624	1183	1183	34.7941	MS2	60/240
	VGDGYVFEENGVSR	17	8	CID		6.67014	1.51918	0	1	2	1527.71	-0.280381	2233	2233	46.8606	MS2	12/26
	SNHWVPDSRPEqPSPQPTPEPSPSPQPVPNPQPAPSNPIDEK	1	1	CID	Q12(Deamidated)	5.77021	1.51247	0.289513	2	4	4560.14	-28.683	2212	2212	46.609	MS2	29/246
	VGDGYVFEENGVSR	17	8	CID		14.5188	1.50814	0	1	2	1527.71	3.38173	5671	5671	98.9607	MS2	11/26
	QVDFEALDNLLER	21	8	CID		53.0375	1.42484	0	1	2	1561.78	-0.781592	4655	4655	78.2595	MS2	14/24
	SNHWVPDSRPEQPSPQPTPEPSPSPQPVPNPQPAPSnPIDEK	1	1	CID	N37(Deamidated)	5.77021	1.3684	0.357188	3	4	4560.14	-28.683	2212	2212	46.609	MS2	28/246
	SNHWVPDSRPEQPSPqPTPEPSPSPQPVPNPQPAPSNPIDEK	1	1	CID	Q16(Deamidated)	5.77021	1.36571	0.358453	4	4	4560.14	-28.683	2212	2212	46.609	MS2	31/246
	VGDGYVFEENGVSR	17	8	CID		7.57793	1.32934	0	1	2	1527.71	-1.0128	2495	2495	49.8883	MS2	9/26
	AYDLLAR	21	9	CID		26.4635	1.27348	0	1	2	821.455	3.33132	1931	1931	43.351	MS2	9/12
	SNHWVPDSRPEQPSPQPTPEPSPSPQPVPnPQPAPSNPIDEK	1	1	CID	N30(Deamidated)	5.77021	1.25831	0.408903	5	4	4560.14	-28.683	2212	2212	46.609	MS2	29/246
	SNHWVPDSRPEQPSPQPTPEPSPSPqPVPNPQPAPSNPIDEK	1	1	CID	Q26(Deamidated)	5.77021	1.25198	0.411879	6	4	4560.14	-28.683	2212	2212	46.609	MS2	32/246
	SNHWVPDSRPEQPSPQPTPEPSPSPQPVPNPqPAPSNPIDEK	1	1	CID	Q32(Deamidated)	5.77021	1.24096	0.417055	7	4	4560.14	-28.683	2212	2212	46.609	MS2	29/246
	KVGDGYVFEENGVSR	17	8	CID		28.7462	1.15948	0	1	2	1655.8	-4.67421	1901	1901	43.0179	MS2	10/28
	VGDGYVFEENGVSR	17	8	CID		15.4249	0.995857	0	1	2	1527.71	-0.402451	2928	2928	55.2144	MS2	6/26
	DLSAETAAGIDSK	21	9	CID		17.0233	0.885607	0	1	2	1277.62	0.462822	5763	5763	102.891	MS2	8/24
	VGDGYVFEENGVSR	17	8	CID		7.05413	0.883211	0	1	2	1527.7	-6.87218	4108	4108	69.819	MS2	4/26
	DLSAETAAGIDSK	21	9	CID		10.7358	0.686844	0	1	2	1277.62	-0.39167	5583	5583	96.8355	MS2	6/24
	DLSAETAAGIDSK	21	9	CID		7.71471	0.668767	0	1	2	1277.62	-4.41999	4171	4171	70.7329	MS2	5/24
	MPYNLQYTVEVK	24	11	CID		2.58458	0.496205	0.000760808	2	2	1484.75	-0.134443	2956	2956	55.5675	MS2	4/22
	YYVEHPNERPHSDNGFGNASDHVQR	18	10	CID		13.8561	0.461398	0.37343	4	5	2925.3	0.158635	1180	1180	34.7621	MS2	32/192
gi307126713	9.56	10	1622	18.941	endo-beta-N-acetylglucosaminidase D [Streptococcus pneumoniae 670-6B]
	Sequence	# Proteins	# Protein Groups	Activation Type	Modifications	Probability	XCorr	Δ Score	Rank	Charge	MH+ [Da]	ΔM [ppm]	First Scan	Last Scan	RT [min]	MSOrder	Ions Matched	Annotation
	TGEDYHKNEDIFFTGYQGDPTGQKPGDKDWYGIANLVADR	13	2	CID		119.57	4.25432	0	1	5	4518.09	1.07905	4254	4254	71.9258	MS2	62/312
	ELTLSDNWTNEEFDLSSLAGK	12	2	CID		109.868	3.16219	0	1	2	2369.11	-0.125889	4467	4467	75.2097	MS2	19/40
	NEDIFFTGYQGDPTGQKPGDKDWYGIANLVADR	13	2	CID		22.1432	2.9964	0	1	4	3687.74	1.76788	4495	4495	75.674	MS2	37/192
	DTSLPKPLAENIVPGATVIDSTFPK	11	2	CID		70.9115	2.99497	0	1	3	2610.4	-2.58273	4179	4179	70.8331	MS2	28/96
	AEGVATASETAEAASAAKPEEK	4	1	CID		118.82	2.93634	0	1	2	2118.02	0.978252	1372	1372	36.9805	MS2	22/42
	TEGGEGIEGMLNGTITSLSDK	11	2	CID		47.7301	2.59678	0	1	2	2109	1.01185	4393	4393	74.0539	MS2	15/40
	TGEDYHKNEDIFFTGYQGDPTGQKPGDKDWYGIANLVADR	13	2	CID		13.6158	1.48273	0.0559136	2	6	4518.09	0.577318	4251	4251	71.8912	MS2	50/390
	VLPKPTYqPASDQQK	9	2	CID	Q8(Deamidated)	5.73185	0.734015	0.0982409	2	3	1700.87	-14.7366	3904	3904	67.002	MS2	10/56
	VERVQASAEEK	12	2	CID		4.48649	0.552782	0	1	2	1245.63	-10.0729	2583	2583	50.9341	MS2	5/20
	AEGVATASETAEAASAAKPEEK	4	1	CID		10.6187	0.492216	0.227516	2	3	2118.02	-0.805214	1602	1602	39.6081	MS2	15/84
gi194398492	7.04	17	1945	18.1678	immunoglobulin A1 protease [Streptococcus pneumoniae G54]
	Sequence	# Proteins	# Protein Groups	Activation Type	Modifications	Probability	XCorr	Δ Score	Rank	Charge	MH+ [Da]	ΔM [ppm]	First Scan	Last Scan	RT [min]	MSOrder	Ions Matched	Annotation
	GVPEVQPALPEAVVTDK	2	2	CID		39.2653	2.96899	0	1	2	1748.94	-0.682959	3057	3057	56.808	MS2	13/32
	DVQSGAIVEPAIQPELPEAVVSDK	8	4	CID		8.29222	2.65534	0	1	2	2491.29	1.47575	3808	3808	65.7859	MS2	13/46
	GVPEVQPALPEAVVTDK	2	2	CID		61.412	2.63787	0	1	2	1748.94	-0.0726075	2813	2813	53.7948	MS2	14/32
	DVQSGAIVEPAIQPELPEAVVSDK	8	4	CID		2.92205	2.25372	0	1	3	2491.29	-0.979101	3681	3681	64.1693	MS2	22/92
	DVQSGAIVEPAIQPELPEAVVSDK	8	4	CID		12.6492	2.06776	0	1	2	2491.3	5.62614	3558	3558	62.7477	MS2	12/46
	GVPEVQPALPEAVVTDK	2	2	CID		34.7057	2.04789	0	1	2	1748.94	-1.78159	3436	3436	61.2199	MS2	9/32
	GVPEVQPALPEAVVTDK	2	2	CID		41.4439	1.82545	0	1	2	1748.94	0.537744	3691	3691	64.2578	MS2	12/32
	IDFQEEIQENPDLAEGTVR	9	4	CID		11.974	1.76705	0	1	3	2203.05	-0.259687	3166	3166	58.0756	MS2	18/72
	IDFQEEIQENPDLAEGTVR	9	4	CID		45.0404	1.71078	0	1	2	2203.05	-0.12417	3164	3164	58.0635	MS2	14/36
	EIVSTSTTAPIPR	4	3	CID		6.87313	1.59703	0	1	2	1371.75	-0.641318	1698	1698	40.7362	MS2	12/24
	GVPEVQPALPEAVVTDK	2	2	CID		25.6303	1.48406	0	1	2	1748.94	-2.39194	4031	4031	68.5942	MS2	8/32
	IDFQEEIQENPDLAEGTVR	9	4	CID		3.00954	1.48293	0	1	3	2203.05	0.838946	3423	3423	61.0833	MS2	17/72
	IDFQEEIQENPDLAEGTVR	9	4	CID		3.86454	1.36076	0	1	3	2203.05	-0.992109	3707	3707	64.4606	MS2	14/72
	TGVNTLNPQDEVLSGQLNKPELLYR	12	6	CID		10.4475	0.990833	0	1	3	2798.47	0.189747	3613	3613	63.3723	MS2	11/96
	GIGGLVSKVDnSRISnSSFTGR	2	2	CID	N11(Deamidated) N16(Deamidated)	2.30053	0.805712	0	1	2	2253.14	-10.7952	2736	2736	52.9074	MS2	5/42
	IDFQEEIQENPDLAEGTVR	9	4	CID		2.88723	0.730299	0	1	2	2203.06	4.27036	4134	4134	70.2004	MS2	9/36
	GEPEVQPALPEAVVSDK	1	1	CID		2.73459	0.614069	0.382663	2	2	1764.9	-0.228584	3048	3048	56.6951	MS2	5/32
gi225861112	18.77	23	826	17.5141	pneumococcal histidine triad protein B [Streptococcus pneumoniae Taiwan19F-14]
	Sequence	# Proteins	# Protein Groups	Activation Type	Modifications	Probability	XCorr	Δ Score	Rank	Charge	MH+ [Da]	ΔM [ppm]	First Scan	Last Scan	RT [min]	MSOrder	Ions Matched	Annotation
	YYVEHPNERPHSDNGFGNASDHVQR	18	10	CID		91.5028	3.61674	0	1	4	2925.31	2.43038	1216	1216	35.1632	MS2	41/144
	FEWFDEGLYEAPK	25	11	CID		92.5042	3.56448	0	1	2	1630.74	0.13001	4157	4157	70.5067	MS2	21/24
	DLSAETAAGIDSK	21	9	CID		83.67	3.34527	0	1	2	1277.62	-0.147529	1579	1579	39.3661	MS2	19/24
	EEKPQSEKPESPKPTEEPEEESPEESEEPQVETEKVEEK	5	3	CID		42.7868	2.40773	0	1	4	4537.07	3.76429	1390	1390	37.1824	MS2	32/228
	DLSAETAAGIDSK	21	9	CID		48.8255	2.36318	0	1	2	1277.62	0.218682	5692	5692	99.8728	MS2	16/24
	NELSASELAAAEAYWNGK	7	4	CID		49.4058	2.21673	0	2	2	1923.91	1.70048	3878	3878	66.694	MS2	15/34
	YYVEHPNERPHSDNGFGNASDHVQR	18	10	CID		48.3453	1.87333	0	1	3	2925.3	0.00242266	1192	1192	34.8892	MS2	22/96
	EEKPQSEKPESPKPTEEPEEESPEESEEPQVETEK	5	3	CID		15.5532	1.86277	0	1	4	4051.82	3.57499	1196	1196	34.9267	MS2	29/204
	YYVEHPNERPHSDNGFGNASDHVQR	18	10	CID		40.1942	1.56481	0	1	6	2925.31	1.97624	1183	1183	34.7941	MS2	60/240
	VGDGYVFEENGVSR	17	8	CID		6.67014	1.51918	0	1	2	1527.71	-0.280381	2233	2233	46.8606	MS2	12/26
	VGDGYVFEENGVSR	17	8	CID		14.5188	1.50814	0	1	2	1527.71	3.38173	5671	5671	98.9607	MS2	11/26
	QVDFEALDNLLER	21	8	CID		53.0375	1.42484	0	1	2	1561.78	-0.781592	4655	4655	78.2595	MS2	14/24
	VGDGYVFEENGVSR	17	8	CID		7.57793	1.32934	0	1	2	1527.71	-1.0128	2495	2495	49.8883	MS2	9/26
	AYDLLAR	21	9	CID		26.4635	1.27348	0	1	2	821.455	3.33132	1931	1931	43.351	MS2	9/12
	KVGDGYVFEENGVSR	17	8	CID		28.7462	1.15948	0	1	2	1655.8	-4.67421	1901	1901	43.0179	MS2	10/28
	VGDGYVFEENGVSR	17	8	CID		15.4249	0.995857	0	1	2	1527.71	-0.402451	2928	2928	55.2144	MS2	6/26
	DLSAETAAGIDSK	21	9	CID		17.0233	0.885607	0	1	2	1277.62	0.462822	5763	5763	102.891	MS2	8/24
	VGDGYVFEENGVSR	17	8	CID		7.05413	0.883211	0	1	2	1527.7	-6.87218	4108	4108	69.819	MS2	4/26
	DLSAETAAGIDSK	21	9	CID		10.7358	0.686844	0	1	2	1277.62	-0.39167	5583	5583	96.8355	MS2	6/24
	DLSAETAAGIDSK	21	9	CID		7.71471	0.668767	0	1	2	1277.62	-4.41999	4171	4171	70.7329	MS2	5/24
	EEKPQSEKPESPKPTEEPEEESPEESEEPQVETEKVEEK	5	3	CID		21.1551	0.538261	0	1	5	4537.06	1.18737	1427	1427	37.621	MS2	46/304
	MPYNLQYTVEVK	24	11	CID		2.58458	0.496205	0.000760808	2	2	1484.75	-0.134443	2956	2956	55.5675	MS2	4/22
	YYVEHPNERPHSDNGFGNASDHVQR	18	10	CID		13.8561	0.461398	0.37343	4	5	2925.3	0.158635	1180	1180	34.7621	MS2	32/192
gi225858962	18.48	9	817	16.3286	pneumococcal histidine triad protein B [Streptococcus pneumoniae 70585]
	Sequence	# Proteins	# Protein Groups	Activation Type	Modifications	Probability	XCorr	Δ Score	Rank	Charge	MH+ [Da]	ΔM [ppm]	First Scan	Last Scan	RT [min]	MSOrder	Ions Matched	Annotation
	TNWVPSVSNPGTTNTNTSNNSNTNSQASQSNEDVDSLLK	2	1	CID		70.0033	3.23456	0	1	3	4122.87	1.74111	3284	3284	59.5185	MS2	34/152
	NELSASELAAAEAFLSGR	14	6	CID		97.5789	2.82555	0	1	2	1835.91	0.140518	4642	4642	78.0521	MS2	17/34
	SNHWVPDSRPEQPSPQQTPEPSPGPQPAPNLK	1	1	CID		37.7499	2.75312	0	1	4	3499.7	-0.930477	1922	1922	43.2852	MS2	40/186
	SNHWVPDSRPEQPSPQQTPEPSPGPQPAPNLK	1	1	CID		83.2437	2.6759	0	1	3	3499.69	-6.47123	1926	1926	43.3083	MS2	32/124
	ADEEPVEETPAEPEVPQVETEK	7	2	CID		57.6687	2.42365	0	1	2	2452.13	4.36083	2109	2109	45.389	MS2	15/42
	SNHWVPDSRPEQPSPQQTPEPSPGPQPAPNLK	1	1	CID		12.9387	2.41583	0	1	4	3499.7	3.7082	2522	2522	50.1986	MS2	32/186
	EKGILPPSPDADVK	7	2	CID		9.86541	0.989403	0	1	3	1465.79	-0.674648	1711	1711	40.8518	MS2	14/52
	NDGAVALARSqGR	12	5	CID	Q11(Deamidated)	3.62982	0.84222	0.0470723	2	2	1315.67	2.74256	1646	1646	40.0841	MS2	9/24
	DLPSETVKnLESK	7	2	CID	N9(Deamidated)	4.21817	0.709534	0	1	2	1460.75	0.513385	4532	4532	76.321	MS2	7/24
gi225856849	20.85	21	844	16.2047	pneumococcal histidine triad protein B [Streptococcus pneumoniae P1031]
	Sequence	# Proteins	# Protein Groups	Activation Type	Modifications	Probability	XCorr	Δ Score	Rank	Charge	MH+ [Da]	ΔM [ppm]	First Scan	Last Scan	RT [min]	MSOrder	Ions Matched	Annotation
	YYVEHPNERPHSDNGFGNASDHVQR	18	10	CID		91.5028	3.61674	0	1	4	2925.31	2.43038	1216	1216	35.1632	MS2	41/144
	FEWFDEGLYEAPK	25	11	CID		92.5042	3.56448	0	1	2	1630.74	0.13001	4157	4157	70.5067	MS2	21/24
	DLSAETAAGIDSK	21	9	CID		83.67	3.34527	0	1	2	1277.62	-0.147529	1579	1579	39.3661	MS2	19/24
	TNWVPSVSNPGTTNTNTSNNSNTNSQASQSNDIDSLLK	14	6	CID		41.0592	3.31508	0	1	3	4007.85	1.46943	3524	3524	62.3106	MS2	28/148
	DLSAETAAGIDSK	21	9	CID		48.8255	2.36318	0	1	2	1277.62	0.218682	5692	5692	99.8728	MS2	16/24
	SnHWVPDSRPEQPSPQPTPEPSPSPQPAPNPQPAPSNPIDEK	5	2	CID	N2(Deamidated)	12.6188	2.27404	0.0477364	3	4	4532.14	4.08188	2379	2379	48.5566	MS2	33/246
	SNHWVPDSRPEQPSPQPTPEPSPSPQPAPNPQPAPSNPIDEK	5	2	CID		29.837	2.15329	0	1	4	4531.14	-10.4373	2114	2114	45.4605	MS2	30/246
	SNHWVPDSRPEQPSPQPTPEPSPSPQPAPNPqPAPSNPIDEK	5	2	CID	Q32(Deamidated)	3.14143	2.12551	0.109933	5	4	4532.14	4.08188	2379	2379	48.5566	MS2	33/246
	SNHWVPDSRPEQPSPQPTPEPSPSPQPAPnPQPAPSNPIDEK	5	2	CID	N30(Deamidated)	3.14143	2.08972	0.124922	6	4	4532.14	4.08188	2379	2379	48.5566	MS2	34/246
	SNHWVPDSRPEqPSPQPTPEPSPSPQPAPNPQPAPSNPIDEK	5	2	CID	Q12(Deamidated)	12.6188	1.96656	0.176495	10	4	4532.14	4.08188	2379	2379	48.5566	MS2	33/246
	YYVEHPNERPHSDNGFGNASDHVQR	18	10	CID		48.3453	1.87333	0	1	3	2925.3	0.00242266	1192	1192	34.8892	MS2	22/96
	SnHWVPDSRPEQPSPQPTPEPSPSPQPAPNPQPAPSNPIDEK	5	2	CID	N2(Deamidated)	3.28494	1.64769	0.0850074	3	4	4532.14	0.175633	2631	2631	51.5702	MS2	30/246
	YYVEHPNERPHSDNGFGNASDHVQR	18	10	CID		40.1942	1.56481	0	1	6	2925.31	1.97624	1183	1183	34.7941	MS2	60/240
	QVDFEALDNLLER	21	8	CID		53.0375	1.42484	0	1	2	1561.78	-0.781592	4655	4655	78.2595	MS2	14/24
	AYDLLAR	21	9	CID		26.4635	1.27348	0	1	2	821.455	3.33132	1931	1931	43.351	MS2	9/12
	DLSAETAAGIDSK	21	9	CID		17.0233	0.885607	0	1	2	1277.62	0.462822	5763	5763	102.891	MS2	8/24
	NDGAVALARSqGR	12	5	CID	Q11(Deamidated)	3.62982	0.84222	0.0470723	2	2	1315.67	2.74256	1646	1646	40.0841	MS2	9/24
	DLSAETAAGIDSK	21	9	CID		10.7358	0.686844	0	1	2	1277.62	-0.39167	5583	5583	96.8355	MS2	6/24
	DLSAETAAGIDSK	21	9	CID		7.71471	0.668767	0	1	2	1277.62	-4.41999	4171	4171	70.7329	MS2	5/24
	MPYNLQYTVEVK	24	11	CID		2.58458	0.496205	0.000760808	2	2	1484.75	-0.134443	2956	2956	55.5675	MS2	4/22
	YYVEHPNERPHSDNGFGNASDHVQR	18	10	CID		13.8561	0.461398	0.37343	4	5	2925.3	0.158635	1180	1180	34.7621	MS2	32/192
gi169834040	21.67	30	849	16.0988	pneumococcal histidine triad protein B [Streptococcus pneumoniae Hungary19A-6]
	Sequence	# Proteins	# Protein Groups	Activation Type	Modifications	Probability	XCorr	Δ Score	Rank	Charge	MH+ [Da]	ΔM [ppm]	First Scan	Last Scan	RT [min]	MSOrder	Ions Matched	Annotation
	YYVEHPNERPHSDNGFGNASDHVQR	18	10	CID		91.5028	3.61674	0	1	4	2925.31	2.43038	1216	1216	35.1632	MS2	41/144
	FEWFDEGLYEAPK	25	11	CID		92.5042	3.56448	0	1	2	1630.74	0.13001	4157	4157	70.5067	MS2	21/24
	DLSAETAAGIDSK	21	9	CID		83.67	3.34527	0	1	2	1277.62	-0.147529	1579	1579	39.3661	MS2	19/24
	IAEAEALLEK	5	2	CID		54.2055	3.20913	0	1	2	1086.6	0.480557	2219	2219	46.7048	MS2	16/18
	DLSAETAAGIDSK	21	9	CID		48.8255	2.36318	0	1	2	1277.62	0.218682	5692	5692	99.8728	MS2	16/24
	SnHWVPDSRPEQPSPQPTPEPSPSPQPAPNPQPAPSNPIDEK	5	2	CID	N2(Deamidated)	12.6188	2.27404	0.0477364	3	4	4532.14	4.08188	2379	2379	48.5566	MS2	33/246
	SNHWVPDSRPEQPSPQPTPEPSPSPQPAPNPQPAPSNPIDEK	5	2	CID		29.837	2.15329	0	1	4	4531.14	-10.4373	2114	2114	45.4605	MS2	30/246
	SNHWVPDSRPEQPSPQPTPEPSPSPQPAPNPqPAPSNPIDEK	5	2	CID	Q32(Deamidated)	3.14143	2.12551	0.109933	5	4	4532.14	4.08188	2379	2379	48.5566	MS2	33/246
	SNHWVPDSRPEQPSPQPTPEPSPSPQPAPnPQPAPSNPIDEK	5	2	CID	N30(Deamidated)	3.14143	2.08972	0.124922	6	4	4532.14	4.08188	2379	2379	48.5566	MS2	34/246
	SNHWVPDSRPEqPSPQPTPEPSPSPQPAPNPQPAPSNPIDEK	5	2	CID	Q12(Deamidated)	12.6188	1.96656	0.176495	10	4	4532.14	4.08188	2379	2379	48.5566	MS2	33/246
	YYVEHPNERPHSDNGFGNASDHVQR	18	10	CID		48.3453	1.87333	0	1	3	2925.3	0.00242266	1192	1192	34.8892	MS2	22/96
	SnHWVPDSRPEQPSPQPTPEPSPSPQPAPNPQPAPSNPIDEK	5	2	CID	N2(Deamidated)	3.28494	1.64769	0.0850074	3	4	4532.14	0.175633	2631	2631	51.5702	MS2	30/246
	YYVEHPNERPHSDNGFGNASDHVQR	18	10	CID		40.1942	1.56481	0	1	6	2925.31	1.97624	1183	1183	34.7941	MS2	60/240
	VGDGYVFEENGVSR	17	8	CID		6.67014	1.51918	0	1	2	1527.71	-0.280381	2233	2233	46.8606	MS2	12/26
	VGDGYVFEENGVSR	17	8	CID		14.5188	1.50814	0	1	2	1527.71	3.38173	5671	5671	98.9607	MS2	11/26
	EEIKRqKqEHSHNHGGGSNDQAVVAAR	3	2	CID	Q6(Deamidated) Q8(Deamidated)	4.10322	1.42894	0.0752937	2	4	2984.43	-6.6817	4753	4753	80.056	MS2	24/156
	QVDFEALDNLLER	21	8	CID		53.0375	1.42484	0	1	2	1561.78	-0.781592	4655	4655	78.2595	MS2	14/24
	VGDGYVFEENGVSR	17	8	CID		7.57793	1.32934	0	1	2	1527.71	-1.0128	2495	2495	49.8883	MS2	9/26
	EEIKRqKQEHSHnHGGGSNDQAVVAAR	3	2	CID	Q6(Deamidated) N13(Deamidated)	4.10322	1.286	0.167795	5	4	2984.43	-6.6817	4753	4753	80.056	MS2	24/156
	AYDLLAR	21	9	CID		26.4635	1.27348	0	1	2	821.455	3.33132	1931	1931	43.351	MS2	9/12
	IAEAEALLEKVTDSSIR	5	2	CID		4.21535	1.18944	0	1	3	1845	0.0128133	4188	4188	71.0023	MS2	14/64
	KVGDGYVFEENGVSR	17	8	CID		28.7462	1.15948	0	1	2	1655.8	-4.67421	1901	1901	43.0179	MS2	10/28
	EEIKRqKQEHSHNHGGGSnDQAVVAAR	3	2	CID	Q6(Deamidated) N19(Deamidated)	4.10322	1.14025	0.262112	9	4	2984.43	-6.6817	4753	4753	80.056	MS2	22/156
	VGDGYVFEENGVSR	17	8	CID		15.4249	0.995857	0	1	2	1527.71	-0.402451	2928	2928	55.2144	MS2	6/26
	DLSAETAAGIDSK	21	9	CID		17.0233	0.885607	0	1	2	1277.62	0.462822	5763	5763	102.891	MS2	8/24
	VGDGYVFEENGVSR	17	8	CID		7.05413	0.883211	0	1	2	1527.7	-6.87218	4108	4108	69.819	MS2	4/26
	DLSAETAAGIDSK	21	9	CID		10.7358	0.686844	0	1	2	1277.62	-0.39167	5583	5583	96.8355	MS2	6/24
	DLSAETAAGIDSK	21	9	CID		7.71471	0.668767	0	1	2	1277.62	-4.41999	4171	4171	70.7329	MS2	5/24
	MPYNLQYTVEVK	24	11	CID		2.58458	0.496205	0.000760808	2	2	1484.75	-0.134443	2956	2956	55.5675	MS2	4/22
	YYVEHPNERPHSDNGFGNASDHVQR	18	10	CID		13.8561	0.461398	0.37343	4	5	2925.3	0.158635	1180	1180	34.7621	MS2	32/192
gi169832777	9.1	9	1637	16.0047	endo-beta-N-acetylglucosaminidase D [Streptococcus pneumoniae Hungary19A-6]
	Sequence	# Proteins	# Protein Groups	Activation Type	Modifications	Probability	XCorr	Δ Score	Rank	Charge	MH+ [Da]	ΔM [ppm]	First Scan	Last Scan	RT [min]	MSOrder	Ions Matched	Annotation
	TGEDYHKNEDIFFTGYQGDPTGQKPGDKDWYGIANLVADR	13	2	CID		119.57	4.25432	0	1	5	4518.09	1.07905	4254	4254	71.9258	MS2	62/312
	ELTLSDNWTNEEFDLSSLAGK	12	2	CID		109.868	3.16219	0	1	2	2369.11	-0.125889	4467	4467	75.2097	MS2	19/40
	NEDIFFTGYQGDPTGQKPGDKDWYGIANLVADR	13	2	CID		22.1432	2.9964	0	1	4	3687.74	1.76788	4495	4495	75.674	MS2	37/192
	DTSLPKPLAENIVPGATVIDSTFPK	11	2	CID		70.9115	2.99497	0	1	3	2610.4	-2.58273	4179	4179	70.8331	MS2	28/96
	TEGGEGIEGMLNGTITSLSDK	11	2	CID		47.7301	2.59678	0	1	2	2109	1.01185	4393	4393	74.0539	MS2	15/40
	TGEDYHKNEDIFFTGYQGDPTGQKPGDKDWYGIANLVADR	13	2	CID		13.6158	1.48273	0.0559136	2	6	4518.09	0.577318	4251	4251	71.8912	MS2	50/390
	VLPKPTYqPASDQQK	9	2	CID	Q8(Deamidated)	5.73185	0.734015	0.0982409	2	3	1700.87	-14.7366	3904	3904	67.002	MS2	10/56
	VERVQASAEEK	12	2	CID		4.48649	0.552782	0	1	2	1245.63	-10.0729	2583	2583	50.9341	MS2	5/20
	VPADNFFAnFnWDKTK	1	1	CID	N9(Deamidated) N11(Deamidated)	3.28185	0.429952	0.143315	3	2	1915.87	-18.3478	4370	4370	73.722	MS2	5/30
gi307067666	29.58	12	311	15.869	hypothetical protein SPAP_1041 [Streptococcus pneumoniae AP200]
	Sequence	# Proteins	# Protein Groups	Activation Type	Modifications	Probability	XCorr	Δ Score	Rank	Charge	MH+ [Da]	ΔM [ppm]	First Scan	Last Scan	RT [min]	MSOrder	Ions Matched	Annotation
	YYVEHPNERPHSDNGFGNASDHVQR	18	10	CID		91.5028	3.61674	0	1	4	2925.31	2.43038	1216	1216	35.1632	MS2	41/144
	FEWFDEGLYEAPK	25	11	CID		92.5042	3.56448	0	1	2	1630.74	0.13001	4157	4157	70.5067	MS2	21/24
	NKNGQADTNQTEKPSEEKPQTEKPEEETPR	5	4	CID		30.3212	3.11548	0	1	4	3439.62	-1.90204	523	523	26.5533	MS2	33/174
	NGQADTNQTEKPSEEKPQTEKPEEETPR	5	4	CID		22.8653	2.41366	0	1	3	3197.48	-0.890448	582	582	27.3827	MS2	24/108
	NGQADTNQTEKPSEEKPQTEKPEEETPR	5	4	CID		37.8751	2.34626	0	1	4	3197.48	-1.69735	580	580	27.3703	MS2	37/162
	YYVEHPNERPHSDNGFGNASDHVQR	18	10	CID		48.3453	1.87333	0	1	3	2925.3	0.00242266	1192	1192	34.8892	MS2	22/96
	YYVEHPNERPHSDNGFGNASDHVQR	18	10	CID		40.1942	1.56481	0	1	6	2925.31	1.97624	1183	1183	34.7941	MS2	60/240
	NGQADTNQTEKPSEEKPQTEKPEEETPR	5	4	CID		3.66281	1.4691	0	1	4	3197.49	7.82413	817	817	30.3902	MS2	30/162
	NGQADTNQTEKPSEEKPQTEKPEEETPR	5	4	CID		12.5317	0.896709	0.341624	10	5	3197.49	3.35512	584	584	27.4268	MS2	37/216
	LTYTDDEIQVAK	1	1	CID		5.91848	0.698042	0	1	2	1395.7	1.21231	1793	1793	41.7566	MS2	8/22
	MPYNLQYTVEVK	24	11	CID		2.58458	0.496205	0.000760808	2	2	1484.75	-0.134443	2956	2956	55.5675	MS2	4/22
	YYVEHPNERPHSDNGFGNASDHVQR	18	10	CID		13.8561	0.461398	0.37343	4	5	2925.3	0.158635	1180	1180	34.7621	MS2	32/192
gi307128002	8.91	7	202	14.1617	Gls24 protein [Streptococcus pneumoniae 670-6B]
	Sequence	# Proteins	# Protein Groups	Activation Type	Modifications	Probability	XCorr	Δ Score	Rank	Charge	MH+ [Da]	ΔM [ppm]	First Scan	Last Scan	RT [min]	MSOrder	Ions Matched	Annotation
	VSDVAESTGEFTSEQFEK	1	1	CID		300	3.84733	0	1	2	1989.89	-0.690068	2466	2466	49.5349	MS2	23/34
	VSDVAESTGEFTSEQFEK	1	1	CID		68.7176	2.85968	0	1	2	1989.89	-0.323858	2707	2707	52.5676	MS2	13/34
	VSDVAESTGEFTSEQFEK	1	1	CID		86.953	2.74021	0	1	2	1989.88	-8.50257	5372	5372	92.4729	MS2	11/34
	VSDVAESTGEFTSEQFEK	1	1	CID		26.7605	2.4468	0	1	2	1989.89	0.652705	2981	2981	55.861	MS2	10/34
	VSDVAESTGEFTSEQFEK	1	1	CID		34.9415	2.26768	0	1	2	1989.9	5.53552	5168	5168	88.4947	MS2	9/34
	VSDVAESTGEFTSEQFEK	1	1	CID		35.4022	0.94507	0	1	2	1989.89	0.286494	5653	5653	98.416	MS2	11/34
	VSDVAESTGEFTSEQFEK	1	1	CID		2.20558	0.458789	0	1	2	1989.89	-2.27698	5731	5731	101.463	MS2	5/34
gi225859960	16.47	9	692	13.697	choline binding protein A [Streptococcus pneumoniae 70585]
	Sequence	# Proteins	# Protein Groups	Activation Type	Modifications	Probability	XCorr	Δ Score	Rank	Charge	MH+ [Da]	ΔM [ppm]	First Scan	Last Scan	RT [min]	MSOrder	Ions Matched	Annotation
	EKPAEQPQPAPAPQPEKPAPKPEKPAEQPK	1	1	CID		44.2844	3.4747	0	1	4	3239.71	3.04585	663	663	28.384	MS2	33/174
	SSDSSVGEETLPSSSLK	2	2	CID		88.6208	3.31395	0	1	2	1709.81	-0.596865	1766	1766	41.4738	MS2	19/32
	EKPAEQPQPAPAPQPEKPAPKPEKPAEQPK	1	1	CID		18.1819	2.77153	0	1	4	3239.7	-1.59282	911	911	31.5023	MS2	30/174
	TDDQQAEEDYAR	8	5	CID		94.2574	2.1205	0	1	2	1440.59	-1.91448	568	568	27.2247	MS2	14/22
	TLDLEIAESDVK	2	2	CID		82.4684	2.01634	0	1	2	1332.69	-0.602998	2883	2883	54.7096	MS2	14/22
	ADAKLKEANVATSDqGNPK	1	1	CID	Q15(Deamidated)	4.18122	0.90822	0.0129477	2	3	1957.97	-8.59412	2872	2872	54.5879	MS2	10/72
	ADAKLKEANVATSDQGnPK	1	1	CID	N17(Deamidated)	4.18122	0.848703	0.0776314	6	3	1957.97	-8.59412	2872	2872	54.5879	MS2	10/72
	EKPAEQPQPAPAPQPEKPAPKPEKPAEQPK	1	1	CID		56.7817	0.725595	0.190498	6	6	3239.71	4.72794	777	777	29.9079	MS2	56/290
	EAELELVKEEAK	2	2	CID		16.0288	0.724777	0	1	3	1387.73	0.752657	1872	1872	42.6738	MS2	10/44
gi307067684	7.31	17	1875	13.3905	hypothetical protein SPAP_1059 [Streptococcus pneumoniae AP200]
	Sequence	# Proteins	# Protein Groups	Activation Type	Modifications	Probability	XCorr	Δ Score	Rank	Charge	MH+ [Da]	ΔM [ppm]	First Scan	Last Scan	RT [min]	MSOrder	Ions Matched	Annotation
	DVQSGAIVEPAIQPELPEAVVSDK	8	4	CID		8.29222	2.65534	0	1	2	2491.29	1.47575	3808	3808	65.7859	MS2	13/46
	GEPEQVAPLPEYK	7	3	CID		68.7712	2.64465	0	1	2	1456.73	0.690244	1923	1923	43.2914	MS2	15/24
	DVQSGAIVEPAIQPELPEAVVSDK	8	4	CID		2.92205	2.25372	0	1	3	2491.29	-0.979101	3681	3681	64.1693	MS2	22/92
	DVQSGAIVEPAIQPELPEAVVSDK	8	4	CID		12.6492	2.06776	0	1	2	2491.3	5.62614	3558	3558	62.7477	MS2	12/46
	GEPEQVAPLPEYK	7	3	CID		38.9546	2.05821	0	1	2	1456.73	0.0798925	2222	2222	46.7342	MS2	13/24
	GNIEQVKPETPVEK	7	3	CID		28.8842	1.95424	0	1	3	1567.83	0.350665	1345	1345	36.7056	MS2	15/52
	IDFQEEIQENPDLAEGTVR	9	4	CID		11.974	1.76705	0	1	3	2203.05	-0.259687	3166	3166	58.0756	MS2	18/72
	IDFQEEIQENPDLAEGTVR	9	4	CID		45.0404	1.71078	0	1	2	2203.05	-0.12417	3164	3164	58.0635	MS2	14/36
	IDFQEEIQENPDLAEGTVR	9	4	CID		3.00954	1.48293	0	1	3	2203.05	0.838946	3423	3423	61.0833	MS2	17/72
	IDFQEEIQENPDLAEGTVR	9	4	CID		3.86454	1.36076	0	1	3	2203.05	-0.992109	3707	3707	64.4606	MS2	14/72
	TGVNTLNPQDEVLSGQLNKPELLYR	12	6	CID		10.4475	0.990833	0	1	3	2798.47	0.189747	3613	3613	63.3723	MS2	11/96
	NmVLPLLTLPEK	2	2	CID	M2(Oxidation)	9.47921	0.839073	0	1	2	1383.8	13.0588	1969	1969	43.792	MS2	5/22
	GEPEQVAPLPEYK	7	3	CID		11.4847	0.811433	0	1	2	1456.73	-5.2912	2850	2850	54.2991	MS2	5/24
	IDFQEEIQENPDLAEGTVR	9	4	CID		2.88723	0.730299	0	1	2	2203.06	4.27036	4134	4134	70.2004	MS2	9/36
	GNIEQVKPETPVEK	7	3	CID		26.1356	0.671873	0	1	3	1567.83	-0.198652	1088	1088	33.6968	MS2	14/52
	DGMVPYISnqFEADARANnK	2	2	CID	N9(Deamidated) Q10(Deamidated) N19(Deamidated)	2.43544	0.568067	0.0729406	2	2	2243.01	20.5336	2846	2846	54.2463	MS2	6/38
	TKEHLTETLK	2	2	CID		4.78408	0.416321	0	1	2	1199.65	-8.48269	3907	3907	67.0349	MS2	6/18
gi225860984	15.78	11	1039	12.3452	pneumococcal histidine triad protein E [Streptococcus pneumoniae Taiwan19F-14]
	Sequence	# Proteins	# Protein Groups	Activation Type	Modifications	Probability	XCorr	Δ Score	Rank	Charge	MH+ [Da]	ΔM [ppm]	First Scan	Last Scan	RT [min]	MSOrder	Ions Matched	Annotation
	NmADFTGEAPQGNGENKPSENGK	9	1	CID	M2(Oxidation)	59.7957	3.3408	0	1	3	2408.04	2.67559	853	853	30.8205	MS2	28/88
	MVPISGTGSTVSTNAKPNEVVSSLGSLSSNPSSLTTSK	9	1	CID		26.4647	2.85172	0	1	3	3721.88	3.56088	3479	3479	61.7021	MS2	23/148
	TSHNGLDSLSSHEQDYPSNAK	6	1	CID		48.0066	2.52776	0	1	3	2287.02	0.0296492	1387	1387	37.1363	MS2	26/80
	YSESDGLVFDPAK	10	1	CID		58.7481	2.00414	0	1	2	1427.67	-0.212529	2558	2558	50.6039	MS2	12/24
	NmADFTGEAPQGNGENKPSENGK	9	1	CID	M2(Oxidation)	14.7946	1.67894	0	1	3	2408.04	-0.437206	1098	1098	33.8274	MS2	15/88
	NmADFTGEAPQGNGENKPSENGK	9	1	CID	M2(Oxidation)	46.6367	1.62077	0	1	2	2408.05	4.15388	859	859	30.8736	MS2	9/44
	LSETGNSTSNSTLEEVPTVDPVQEK	9	1	CID		20.0161	1.33717	0	1	2	2661.28	2.80763	2476	2476	49.6599	MS2	11/48
	SNQIGQPTLPNNSLATPSPSLPINPGTSHEK	9	1	CID		3.38437	1.09519	0.0835545	2	3	3196.63	2.52838	2958	2958	55.5939	MS2	13/120
	NMADFTGEAPQGNGENKPSENGK	9	1	CID		18.5149	1.07622	0	1	3	2392.05	-1.79906	1586	1586	39.4471	MS2	14/88
	InSnVAVARSQGR	1	1	CID	N2(Deamidated) N4(Deamidated)	8.3026	0.959517	0	1	2	1373.72	3.00082	4566	4566	76.8823	MS2	6/24
	InSNVAVARSqGR	1	1	CID	N2(Deamidated) Q11(Deamidated)	2.51399	0.598831	0.375903	3	2	1373.72	3.00082	4566	4566	76.8823	MS2	7/24
gi169833025	7.89	8	1900	11.8372	zinc metalloprotease ZmpB [Streptococcus pneumoniae Hungary19A-6]
	Sequence	# Proteins	# Protein Groups	Activation Type	Modifications	Probability	XCorr	Δ Score	Rank	Charge	MH+ [Da]	ΔM [ppm]	First Scan	Last Scan	RT [min]	MSOrder	Ions Matched	Annotation
	TLGLDTVLEETSAKPGEVTVVEVETPQSTTNQEQAR	8	6	CID		131.24	4.57728	0	1	3	3856.93	1.00209	3994	3994	68.0843	MS2	38/140
	VEEGKEDSAEPAPVEEVGGEVESKPEEK	10	9	CID		81.8654	3.51272	0	1	3	2983.39	1.35649	1816	1816	42.0263	MS2	26/108
	TENQVVETEEAPKEEAPR	1	1	CID		68.582	2.08602	0	1	2	2055.99	3.8427	1086	1086	33.6711	MS2	12/34
	VEEGKEDSAEPAPVEEVGGEVESKPEEK	10	9	CID		64.8693	1.91528	0	1	4	2983.39	2.07546	1856	1856	42.4997	MS2	51/162
	VPEQPVQPTQAEQPSTPK	3	3	CID		21.8213	1.66114	0	1	2	1960.99	-3.95343	1302	1302	36.2674	MS2	9/34
	GEKGFVAIEIDGKTITnYAELR	1	1	CID	N17(Deamidated)	2.65612	1.25311	0.554661	2	2	2425.25	-6.36103	5004	5004	85.1659	MS2	7/42
	IGNVYYNFNELITDmQK	1	1	CID	M15(Oxidation)	2.58975	0.436632	0	1	2	2077.98	-12.8879	3572	3572	62.9395	MS2	4/32
	qVAqEGVNGKK	4	4	CID	Q1(Deamidated) Q4(Deamidated)	2.02682	0.412772	0.643171	6	2	1159.61	10.9675	4093	4093	69.5887	MS2	4/20
gi169833458	6.92	13	1892	11.6797	immunoglobulin A1 protease [Streptococcus pneumoniae Hungary19A-6]
	Sequence	# Proteins	# Protein Groups	Activation Type	Modifications	Probability	XCorr	Δ Score	Rank	Charge	MH+ [Da]	ΔM [ppm]	First Scan	Last Scan	RT [min]	MSOrder	Ions Matched	Annotation
	DVQSGAIVEPAIQPELPEAVVSDK	8	4	CID		8.29222	2.65534	0	1	2	2491.29	1.47575	3808	3808	65.7859	MS2	13/46
	GEPEQVAPLPEYK	7	3	CID		68.7712	2.64465	0	1	2	1456.73	0.690244	1923	1923	43.2914	MS2	15/24
	DVQSGAIVEPAIQPELPEAVVSDK	8	4	CID		2.92205	2.25372	0	1	3	2491.29	-0.979101	3681	3681	64.1693	MS2	22/92
	DVQSGAIVEPAIQPELPEAVVSDK	8	4	CID		12.6492	2.06776	0	1	2	2491.3	5.62614	3558	3558	62.7477	MS2	12/46
	GEPEQVAPLPEYK	7	3	CID		38.9546	2.05821	0	1	2	1456.73	0.0798925	2222	2222	46.7342	MS2	13/24
	GNIEQVKPETPVEK	7	3	CID		28.8842	1.95424	0	1	3	1567.83	0.350665	1345	1345	36.7056	MS2	15/52
	EIVSTSTTAPIPR	4	3	CID		6.87313	1.59703	0	1	2	1371.75	-0.641318	1698	1698	40.7362	MS2	12/24
	TGVNTLNPQDEVLSGQLNKPELLYR	12	6	CID		10.4475	0.990833	0	1	3	2798.47	0.189747	3613	3613	63.3723	MS2	11/96
	NmVLPLLTLPEK	2	2	CID	M2(Oxidation)	9.47921	0.839073	0	1	2	1383.8	13.0588	1969	1969	43.792	MS2	5/22
	GEPEQVAPLPEYK	7	3	CID		11.4847	0.811433	0	1	2	1456.73	-5.2912	2850	2850	54.2991	MS2	5/24
	GNIEQVKPETPVEK	7	3	CID		26.1356	0.671873	0	1	3	1567.83	-0.198652	1088	1088	33.6968	MS2	14/52
	DGMVPYISnqFEADARANnK	2	2	CID	N9(Deamidated) Q10(Deamidated) N19(Deamidated)	2.43544	0.568067	0.0729406	2	2	2243.01	20.5336	2846	2846	54.2463	MS2	6/38
	TKEHLTETLK	2	2	CID		4.78408	0.416321	0	1	2	1199.65	-8.48269	3907	3907	67.0349	MS2	6/18
gi15900876	14.06	19	839	11.4897	hypothetical protein SP_1003 [Streptococcus pneumoniae TIGR4]
	Sequence	# Proteins	# Protein Groups	Activation Type	Modifications	Probability	XCorr	Δ Score	Rank	Charge	MH+ [Da]	ΔM [ppm]	First Scan	Last Scan	RT [min]	MSOrder	Ions Matched	Annotation
	FEWFDEGLYEAPK	25	11	CID		92.5042	3.56448	0	1	2	1630.74	0.13001	4157	4157	70.5067	MS2	21/24
	DLSAETAAGIDSK	21	9	CID		83.67	3.34527	0	1	2	1277.62	-0.147529	1579	1579	39.3661	MS2	19/24
	DLSAETAAGIDSK	21	9	CID		48.8255	2.36318	0	1	2	1277.62	0.218682	5692	5692	99.8728	MS2	16/24
	NELSASELAAAEAYWNGK	7	4	CID		49.4058	2.21673	0	2	2	1923.91	1.70048	3878	3878	66.694	MS2	15/34
	VGDGYVFEENGVSR	17	8	CID		6.67014	1.51918	0	1	2	1527.71	-0.280381	2233	2233	46.8606	MS2	12/26
	VGDGYVFEENGVSR	17	8	CID		14.5188	1.50814	0	1	2	1527.71	3.38173	5671	5671	98.9607	MS2	11/26
	EEIKRqKqEHSHNHGGGSNDQAVVAAR	3	2	CID	Q6(Deamidated) Q8(Deamidated)	4.10322	1.42894	0.0752937	2	4	2984.43	-6.6817	4753	4753	80.056	MS2	24/156
	QVDFEALDNLLER	21	8	CID		53.0375	1.42484	0	1	2	1561.78	-0.781592	4655	4655	78.2595	MS2	14/24
	VGDGYVFEENGVSR	17	8	CID		7.57793	1.32934	0	1	2	1527.71	-1.0128	2495	2495	49.8883	MS2	9/26
	EEIKRqKQEHSHnHGGGSNDQAVVAAR	3	2	CID	Q6(Deamidated) N13(Deamidated)	4.10322	1.286	0.167795	5	4	2984.43	-6.6817	4753	4753	80.056	MS2	24/156
	AYDLLAR	21	9	CID		26.4635	1.27348	0	1	2	821.455	3.33132	1931	1931	43.351	MS2	9/12
	KVGDGYVFEENGVSR	17	8	CID		28.7462	1.15948	0	1	2	1655.8	-4.67421	1901	1901	43.0179	MS2	10/28
	EEIKRqKQEHSHNHGGGSnDQAVVAAR	3	2	CID	Q6(Deamidated) N19(Deamidated)	4.10322	1.14025	0.262112	9	4	2984.43	-6.6817	4753	4753	80.056	MS2	22/156
	VGDGYVFEENGVSR	17	8	CID		15.4249	0.995857	0	1	2	1527.71	-0.402451	2928	2928	55.2144	MS2	6/26
	DLSAETAAGIDSK	21	9	CID		17.0233	0.885607	0	1	2	1277.62	0.462822	5763	5763	102.891	MS2	8/24
	VGDGYVFEENGVSR	17	8	CID		7.05413	0.883211	0	1	2	1527.7	-6.87218	4108	4108	69.819	MS2	4/26
	DLSAETAAGIDSK	21	9	CID		10.7358	0.686844	0	1	2	1277.62	-0.39167	5583	5583	96.8355	MS2	6/24
	DLSAETAAGIDSK	21	9	CID		7.71471	0.668767	0	1	2	1277.62	-4.41999	4171	4171	70.7329	MS2	5/24
	MPYNLQYTVEVK	24	11	CID		2.58458	0.496205	0.000760808	2	2	1484.75	-0.134443	2956	2956	55.5675	MS2	4/22
gi221231267	19.44	5	427	10.854	trigger factor (prolyl isomerase) [Streptococcus pneumoniae ATCC 700669]
	Sequence	# Proteins	# Protein Groups	Activation Type	Modifications	Probability	XCorr	Δ Score	Rank	Charge	MH+ [Da]	ΔM [ppm]	First Scan	Last Scan	RT [min]	MSOrder	Ions Matched	Annotation
	DIDEEVETLADLK	9	1	CID		79.6157	3.37551	0	1	2	1489.73	-0.281201	4071	4071	69.3206	MS2	21/24
	AEGFDASEEEIQK	9	1	CID		66.5878	2.93438	0	1	2	1452.65	0.734502	1469	1469	38.0627	MS2	19/24
	DAVEGAAIDTAVENAEIVELPEEmIHEEVHR	9	1	CID	M24(Oxidation)	85.301	2.29723	0	1	3	3431.62	-2.33318	4226	4226	71.5965	MS2	24/120
	DIDEEVETLADLK	9	1	CID		8.11748	2.24686	0	1	2	1489.73	0.32915	4313	4313	72.8368	MS2	12/24
	EVEQLAADYnMEVAqVqSLLSADMLK	1	1	CID	N10(Deamidated) Q15(Deamidated) Q17(Deamidated)	9.03987	0.419943	0	1	3	2898.34	-28.207	1594	1594	39.5339	MS2	10/100
gi307126286	17.3	13	1312	10.0252	beta-N-acetylhexosaminidase [Streptococcus pneumoniae 670-6B]
	Sequence	# Proteins	# Protein Groups	Activation Type	Modifications	Probability	XCorr	Δ Score	Rank	Charge	MH+ [Da]	ΔM [ppm]	First Scan	Last Scan	RT [min]	MSOrder	Ions Matched	Annotation
	GTNDYYNDPNGNHLTESQMTDLINYAK	13	1	CID		30.3528	3.06164	0	1	3	3088.36	0.0106062	3488	3488	61.8001	MS2	22/104
	AALQGLKPAATHSGSLDENEVAANVETRPELITR	13	1	CID		56.7285	2.57711	0	1	4	3558.86	4.85851	2871	2871	54.5817	MS2	39/198
	TEEKPQEEVSSTPSDKAEVVTPTSAEK	13	1	CID		26.7952	2.33191	0	1	3	2903.4	0.320723	1234	1234	35.402	MS2	20/104
	AYYDDPNGTALTQAEVTELIEYAK	14	1	CID		48.9489	2.0545	0	1	3	2675.28	3.969	4448	4448	74.8855	MS2	19/92
	GTNDYYNDPNGNHLTESQmTDLINYAK	13	1	CID	M19(Oxidation)	17.0361	1.86945	0	1	3	3104.35	-5.40244	2614	2614	51.3583	MS2	19/104
	WYqLYGKFAEYANTLAAMAKERGLQPmAFnDGFYYEDK	13	1	CID	Q3(Deamidated) M27(Oxidation) N30(Deamidated)	5.9058	1.54613	0.636573	8	5	4518.09	18.662	4254	4254	71.9258	MS2	31/296
	NADGQGWYnLDQGLnGIKnTPITSVPK	14	1	CID	N9(Deamidated) N15(Deamidated) N19(Deamidated)	5.79876	1.20398	0.483693	6	3	2903.4	-5.02728	1234	1234	35.402	MS2	13/104
	TEEIPFEVIK	14	1	CID		11.0084	1.02763	0	1	2	1204.65	0.734814	3249	3249	59.06	MS2	6/18
	AYYDDPNGTALTQAEVTELIEYAK	14	1	CID		67.2833	1.00844	0	1	2	2675.27	-1.08347	4451	4451	74.9205	MS2	10/46
	TEEIPFEVIKK	14	1	CID		14.7812	0.791152	0	1	2	1332.74	-0.851397	2641	2641	51.6835	MS2	7/20
	TTETVLDSQVTK	14	1	CID		2.06633	0.705992	0	1	2	1321.68	-0.105459	1366	1366	36.9207	MS2	7/22
	YYPnEGYPVKGYEK	14	1	CID	N4(Deamidated)	3.29195	0.55343	0	1	2	1707.77	-16.9884	3854	3854	66.4285	MS2	7/26
	TYASDDVKRAIEK	14	1	CID		8.90613	0.480104	0.282775	2	2	1495.79	14.1929	634	634	28.0685	MS2	5/24
gi225856358	6.38	7	1880	9.75114	zinc metalloprotease ZmpB [Streptococcus pneumoniae P1031]
	Sequence	# Proteins	# Protein Groups	Activation Type	Modifications	Probability	XCorr	Δ Score	Rank	Charge	MH+ [Da]	ΔM [ppm]	First Scan	Last Scan	RT [min]	MSOrder	Ions Matched	Annotation
	TLGLDTVLEETSAKPGEVTVVEVETPQSTTNQEQAR	8	6	CID		131.24	4.57728	0	1	3	3856.93	1.00209	3994	3994	68.0843	MS2	38/140
	VEEGKEDSAEPAPVEEVGGEVESKPEEK	10	9	CID		81.8654	3.51272	0	1	3	2983.39	1.35649	1816	1816	42.0263	MS2	26/108
	VEEGKEDSAEPAPVEEVGGEVESKPEEK	10	9	CID		64.8693	1.91528	0	1	4	2983.39	2.07546	1856	1856	42.4997	MS2	51/162
	VPEQPVQPTQAEQPSTPK	3	3	CID		21.8213	1.66114	0	1	2	1960.99	-3.95343	1302	1302	36.2674	MS2	9/34
	TETTEDPTKYTDEETVLR	3	3	CID		43.7011	1.44188	0	1	2	2128	2.76177	2075	2075	44.9181	MS2	11/34
	TETTEDPTKYTDEETVLR	3	3	CID		12.2594	1.24627	0	1	3	2127.99	0.978302	2074	2074	44.9119	MS2	17/68
	TVGSKDQYDKVRNmSSDDWK	1	1	CID	M14(Oxidation)	4.31296	0.539669	0.671933	3	2	2375.09	-0.251123	1907	1907	43.1076	MS2	7/38
gi116516874	18.64	9	354	8.83019	hypothetical protein SPD_0093 [Streptococcus pneumoniae D39]
	Sequence	# Proteins	# Protein Groups	Activation Type	Modifications	Probability	XCorr	Δ Score	Rank	Charge	MH+ [Da]	ΔM [ppm]	First Scan	Last Scan	RT [min]	MSOrder	Ions Matched	Annotation
	NTQLEEEVSQAEVELESQQEEK	3	1	CID		154.775	3.86641	0	1	3	2576.18	-1.92789	4113	4113	69.9	MS2	28/84
	NTQLEEEVSQAEVELESQQEEK	3	1	CID		124.552	2.55416	0	1	2	2576.19	0.404893	3919	3919	67.1659	MS2	21/42
	NTQLEEEVSQAEVELESQQEEK	3	1	CID		40.7648	2.40962	0	1	3	2576.18	-1.19547	4353	4353	73.5115	MS2	22/84
	AEETIADLDTPIEK	2	1	CID		20.7899	1.5344	0	1	2	1544.77	-0.244873	2530	2530	50.2865	MS2	11/26
	NTQLEEEVSQAEVELESQQEEK	3	1	CID		39.3406	1.534	0	1	2	2576.19	1.86974	4132	4132	70.1881	MS2	15/42
	SLESPYIPDQAPKSRDK	4	1	CID		3.62455	0.819458	0.262811	3	3	1931	10.3263	5589	5589	96.9477	MS2	12/64
	nKPEEQAqEVADK	4	1	CID	N1(Deamidated) Q8(Deamidated)	5.93133	0.603276	0.0687506	2	2	1487.7	12.2065	1936	1936	43.3909	MS2	3/24
	AEETIADLDTPIEK	2	1	CID		8.3979	0.576038	0	1	2	1544.77	-0.855225	3019	3019	56.3498	MS2	8/26
	AEETIADLDTPIEK	2	1	CID		6.67264	0.480767	0.00942169	2	2	1544.77	-0.977295	2775	2775	53.3038	MS2	3/26
gi15901040	14.71	6	802	8.56429	hypothetical protein SP_1175 [Streptococcus pneumoniae TIGR4]
	Sequence	# Proteins	# Protein Groups	Activation Type	Modifications	Probability	XCorr	Δ Score	Rank	Charge	MH+ [Da]	ΔM [ppm]	First Scan	Last Scan	RT [min]	MSOrder	Ions Matched	Annotation
	TNWVPSVSNPGTTNTNTSNNSNTNSQASQSNDIDSLLK	14	6	CID		41.0592	3.31508	0	1	3	4007.85	1.46943	3524	3524	62.3106	MS2	28/148
	NELSASELAAAEAFLSGR	14	6	CID		97.5789	2.82555	0	1	2	1835.91	0.140518	4642	4642	78.0521	MS2	17/34
	ADEEPVEETPAEPEVPQVETEK	7	2	CID		57.6687	2.42365	0	1	2	2452.13	4.36083	2109	2109	45.389	MS2	15/42
	EKGILPPSPDADVK	7	2	CID		9.86541	0.989403	0	1	3	1465.79	-0.674648	1711	1711	40.8518	MS2	14/52
	NDGAVALARSqGR	12	5	CID	Q11(Deamidated)	3.62982	0.84222	0.0470723	2	2	1315.67	2.74256	1646	1646	40.0841	MS2	9/24
	DLPSETVKnLESK	7	2	CID	N9(Deamidated)	4.21817	0.709534	0	1	2	1460.75	0.513385	4532	4532	76.321	MS2	7/24
gi307128479	18.88	15	392	8.51828	CHAP domain-containing protein [Streptococcus pneumoniae 670-6B]
	Sequence	# Proteins	# Protein Groups	Activation Type	Modifications	Probability	XCorr	Δ Score	Rank	Charge	MH+ [Da]	ΔM [ppm]	First Scan	Last Scan	RT [min]	MSOrder	Ions Matched	Annotation
	ASQQQSVLASANTNLTAQVQAVSESAAAPVR	3	1	CID		28.6578	3.34986	0	1	3	3097.59	1.21486	3861	3861	66.5003	MS2	31/120
	QVDQIQEQVSAIQAEQSNLQAENDR	3	1	CID		32.0655	2.97348	0	1	3	2841.36	0.921329	3350	3350	60.2898	MS2	25/96
	QVDQIQEQVSAIQAEQSNLQAENDR	3	1	CID		20.1568	2.19495	0	1	3	2841.36	-3.2901	5642	5642	98.1852	MS2	17/96
	QVDQIQEQVSAIQAEQSNLQAENDR	3	1	CID		19.3453	1.863	0	1	3	2841.37	4.94965	4035	4035	68.6707	MS2	21/96
	RASQQqSVLASAnTNLTAqVqAVSESAAAPVR	3	1	CID	Q6(Deamidated) N13(Deamidated) Q19(Deamidated) Q21(Deamidated)	5.17855	1.47595	0.0858592	5	6	3257.65	23.2557	722	722	29.1504	MS2	48/310
	RASQQqSVLASANTnLTAqVqAVSESAAAPVR	3	1	CID	Q6(Deamidated) N15(Deamidated) Q19(Deamidated) Q21(Deamidated)	5.17855	1.42931	0.114746	8	6	3257.65	23.2557	722	722	29.1504	MS2	47/310
	qVAnNDAINTVIAnqQK	3	1	CID	Q1(Deamidated) N4(Deamidated) N14(Deamidated) Q15(Deamidated)	13.1726	1.05751	0	1	2	1844.89	1.04796	2036	2036	44.4826	MS2	9/32
	qVANnDAINTVIAnqQK	3	1	CID	Q1(Deamidated) N5(Deamidated) N14(Deamidated) Q15(Deamidated)	13.1726	1.0125	0.0425616	3	2	1844.89	1.04796	2036	2036	44.4826	MS2	9/32
	QVAnnDAINTVIAnqQK	3	1	CID	N4(Deamidated) N5(Deamidated) N14(Deamidated) Q15(Deamidated)	13.1726	1.0125	0.0425616	2	2	1844.89	1.04796	2036	2036	44.4826	MS2	9/32
	qVAnNDAINTVIANqqK	3	1	CID	Q1(Deamidated) N4(Deamidated) Q15(Deamidated) Q16(Deamidated)	13.1726	1.00286	0.0516769	4	2	1844.89	1.04796	2036	2036	44.4826	MS2	9/32
	QVAnnDAINTVIANqqK	3	1	CID	N4(Deamidated) N5(Deamidated) Q15(Deamidated) Q16(Deamidated)	13.1726	0.96551	0.0869982	5	2	1844.89	1.04796	2036	2036	44.4826	MS2	9/32
	qVANnDAINTVIANqqK	3	1	CID	Q1(Deamidated) N5(Deamidated) Q15(Deamidated) Q16(Deamidated)	13.1726	0.96551	0.0869982	6	2	1844.89	1.04796	2036	2036	44.4826	MS2	9/32
	qVAnNDAINTVIAnQqK	3	1	CID	Q1(Deamidated) N4(Deamidated) N14(Deamidated) Q16(Deamidated)	13.1726	0.965003	0.0874775	7	2	1844.89	1.04796	2036	2036	44.4826	MS2	9/32
	QVAnNDAInTVIAnqQK	3	1	CID	N4(Deamidated) N9(Deamidated) N14(Deamidated) Q15(Deamidated)	2.02306	0.956681	0.0953465	9	2	1844.89	1.04796	2036	2036	44.4826	MS2	7/32
	qVANNDAInTVIAnqQK	3	1	CID	Q1(Deamidated) N9(Deamidated) N14(Deamidated) Q15(Deamidated)	2.02306	0.956681	0.0953465	8	2	1844.89	1.04796	2036	2036	44.4826	MS2	7/32
gi307126729	15.98	12	607	8.20778	chaperone protein DnaK [Streptococcus pneumoniae 670-6B]
	Sequence	# Proteins	# Protein Groups	Activation Type	Modifications	Probability	XCorr	Δ Score	Rank	Charge	MH+ [Da]	ΔM [ppm]	First Scan	Last Scan	RT [min]	MSOrder	Ions Matched	Annotation
	LYEQAAAAQQAQEGAEGAQATGNAGDDVVDGEFTEK	5	1	CID		13.3795	3.46204	0	1	3	3639.63	3.05158	2635	2635	51.6068	MS2	29/140
	LYEQAAAAQQAQEGAEGAQATGNAGDDVVDGEFTEK	5	1	CID		34.8045	2.72152	0	1	3	3639.64	4.51643	5662	5662	98.6408	MS2	25/140
	SQVFSTAADNQPAVDIHVLQGERPMAADNK	5	1	CID		21.6489	2.06604	0	1	4	3209.56	-0.697821	3156	3156	57.9873	MS2	35/174
	DAAQAALDDLK	5	1	CID		16.1271	2.02422	0	1	2	1130.57	0.400166	2345	2345	48.192	MS2	13/20
	DAAQAALDDLKK	5	1	CID		71.8895	1.7057	0	1	3	1258.66	0.845186	2106	2106	45.3436	MS2	21/44
	SQVFSTAADNQPAVDIHVLQGERPmAADNK	5	1	CID	M25(Oxidation)	3.12413	1.5399	0	1	4	3225.56	1.94577	2926	2926	55.202	MS2	27/174
	SQVFSTAADNQPAVDIHVLQGERPMAADNK	5	1	CID		70.3575	1.46133	0	1	3	3209.57	1.81807	3117	3117	57.5807	MS2	19/116
	SQVFSTAADNQPAVDIHVLQGERPmAADNK	5	1	CID	M25(Oxidation)	66.1955	1.43461	0	1	3	3225.56	2.99682	2969	2969	55.7008	MS2	23/116
	SqVFSTAADnQPAVDIHVLqGERPMAADnK	5	1	CID	Q2(Deamidated) N10(Deamidated) Q20(Deamidated) N29(Deamidated)	6.22411	1.04507	0.092122	5	4	3213.48	-24.4083	576	576	27.3108	MS2	27/174
	SqVFSTAADNqPAVDIHVLqGERPMAADnK	5	1	CID	Q2(Deamidated) Q11(Deamidated) Q20(Deamidated) N29(Deamidated)	6.22411	0.994964	0.135653	6	4	3213.48	-24.4083	576	576	27.3108	MS2	27/174
	EQTIVIQSNSGLTDEEIDR	5	1	CID		11.5056	0.961621	0	1	2	2147.05	-0.395264	5665	5665	98.7473	MS2	9/36
	EQTIVIQSNSGLTDEEIDR	5	1	CID		6.84728	0.928849	0.323548	4	2	2147.05	-1.12769	2512	2512	50.1	MS2	6/36
gi221231480	4.76	6	1889	8.09	zinc metalloproteinase ZmpB [Streptococcus pneumoniae ATCC 700669]
	Sequence	# Proteins	# Protein Groups	Activation Type	Modifications	Probability	XCorr	Δ Score	Rank	Charge	MH+ [Da]	ΔM [ppm]	First Scan	Last Scan	RT [min]	MSOrder	Ions Matched	Annotation
	TLGLDTVLEETSAKPGEVTVVEVETPQSTTNQEQAR	8	6	CID		131.24	4.57728	0	1	3	3856.93	1.00209	3994	3994	68.0843	MS2	38/140
	VEEGKEDSAEPAPVEEVGGEVESKPEEK	10	9	CID		81.8654	3.51272	0	1	3	2983.39	1.35649	1816	1816	42.0263	MS2	26/108
	VEEGKEDSAEPAPVEEVGGEVESKPEEK	10	9	CID		64.8693	1.91528	0	1	4	2983.39	2.07546	1856	1856	42.4997	MS2	51/162
	DLKKNQLDER	2	1	CID		8.41504	0.826681	0.101408	2	2	1258.67	-9.47636	2782	2782	53.4024	MS2	6/18
	KNQLDERETR	2	1	CID		3.11954	0.643923	0.659199	5	2	1288.66	3.03845	2689	2689	52.348	MS2	4/18
	VELENQLKIAQGK	2	1	CID		5.25153	0.603731	0	1	3	1469.83	0.781182	3783	3783	65.4413	MS2	9/48
gi116515780	5.86	6	1876	8.09	zinc metalloprotease ZmpB [Streptococcus pneumoniae D39]
	Sequence	# Proteins	# Protein Groups	Activation Type	Modifications	Probability	XCorr	Δ Score	Rank	Charge	MH+ [Da]	ΔM [ppm]	First Scan	Last Scan	RT [min]	MSOrder	Ions Matched	Annotation
	TLGLDTVLEETSAKPGEVTVVEVETPQSTTNQEQAR	8	6	CID		131.24	4.57728	0	1	3	3856.93	1.00209	3994	3994	68.0843	MS2	38/140
	VEEGKEDSAEPAPVEEVGGEVESKPEEK	10	9	CID		81.8654	3.51272	0	1	3	2983.39	1.35649	1816	1816	42.0263	MS2	26/108
	VEEGKEDSAEPAPVEEVGGEVESKPEEK	10	9	CID		64.8693	1.91528	0	1	4	2983.39	2.07546	1856	1856	42.4997	MS2	51/162
	IANMGITANTFAIQDPVVNKLNR	1	1	CID		11.1248	1.21788	0.302608	2	5	2500.36	22.3933	1706	1706	40.8093	MS2	32/176
	LDSREKIDSYMK	1	1	CID		9.81066	0.496583	0	1	2	1484.75	3.86556	2956	2956	55.5675	MS2	6/22
	qVAqEGVNGKK	4	4	CID	Q1(Deamidated) Q4(Deamidated)	2.02682	0.412772	0.643171	6	2	1159.61	10.9675	4093	4093	69.5887	MS2	4/20
gi225860655	6.73	9	1902	8.09	zinc metalloprotease ZmpB [Streptococcus pneumoniae Taiwan19F-14]
	Sequence	# Proteins	# Protein Groups	Activation Type	Modifications	Probability	XCorr	Δ Score	Rank	Charge	MH+ [Da]	ΔM [ppm]	First Scan	Last Scan	RT [min]	MSOrder	Ions Matched	Annotation
	TLGLDTVLEETSAKPGEVTVVEVETPQSTTNQEQAR	8	6	CID		131.24	4.57728	0	1	3	3856.93	1.00209	3994	3994	68.0843	MS2	38/140
	VEEGKEDSAEPAPVEEVGGEVESKPEEK	10	9	CID		81.8654	3.51272	0	1	3	2983.39	1.35649	1816	1816	42.0263	MS2	26/108
	VEEGKEDSAEPAPVEEVGGEVESKPEEK	10	9	CID		64.8693	1.91528	0	1	4	2983.39	2.07546	1856	1856	42.4997	MS2	51/162
	AnqDLnnAWFKK	1	1	CID	N2(Deamidated) Q3(Deamidated) N6(Deamidated) N7(Deamidated)	3.48559	0.836443	0.714951	2	2	1452.65	-14.5095	1469	1469	38.0627	MS2	5/22
	DGAIKKSVVK	2	2	CID		6.87389	0.759668	0	1	2	1044.65	9.93935	2402	2402	48.7755	MS2	9/18
	DTKKDAnANSVGR	1	1	CID	N7(Deamidated)	4.50745	0.640438	0	1	2	1376.66	-11.6748	1712	1712	40.8576	MS2	5/24
	TEnQVVEAEEAPKEEAPK	1	1	CID	N3(Deamidated)	3.71239	0.621986	0.680151	4	2	1998.94	-13.268	4280	4280	72.3149	MS2	8/34
	DTKKDANAnSVGR	1	1	CID	N9(Deamidated)	4.50745	0.44447	0.305991	2	2	1376.66	-11.6748	1712	1712	40.8576	MS2	5/24
	qVAqEGVNGKK	4	4	CID	Q1(Deamidated) Q4(Deamidated)	2.02682	0.412772	0.643171	6	2	1159.61	10.9675	4093	4093	69.5887	MS2	4/20
gi307128477	17.05	4	346	7.7646	translation elongation factor Ts [Streptococcus pneumoniae 670-6B]
	Sequence	# Proteins	# Protein Groups	Activation Type	Modifications	Probability	XCorr	Δ Score	Rank	Charge	MH+ [Da]	ΔM [ppm]	First Scan	Last Scan	RT [min]	MSOrder	Ions Matched	Annotation
	ELDEQFVKDELAQLNHVIDQDNESR	3	1	CID		80.5097	3.30057	0	1	3	2984.43	5.90207	4764	4764	80.1741	MS2	24/96
	DELAQLNHVIDQDNESR	3	1	CID		56.9883	2.45254	0	1	2	1995.94	2.53528	2906	2906	54.9674	MS2	14/32
	AQLTDDVIAQAEADIK	3	1	CID		13.4306	2.01149	0	1	2	1700.87	1.29626	3893	3893	66.8913	MS2	10/30
	VDQAYTLLAQVYIMDDSK	3	1	CID		5.4544	0.626742	0	1	2	2073.01	-14.0778	3065	3065	56.9166	MS2	4/34
gi116515359	12.41	6	701	7.45078	choline binding protein A [Streptococcus pneumoniae D39]
	Sequence	# Proteins	# Protein Groups	Activation Type	Modifications	Probability	XCorr	Δ Score	Rank	Charge	MH+ [Da]	ΔM [ppm]	First Scan	Last Scan	RT [min]	MSOrder	Ions Matched	Annotation
	SSDSSVGEETLPSSSLK	2	2	CID		88.6208	3.31395	0	1	2	1709.81	-0.596865	1766	1766	41.4738	MS2	19/32
	TDDQQAEEDYAR	8	5	CID		94.2574	2.1205	0	1	2	1440.59	-1.91448	568	568	27.2247	MS2	14/22
	TLDLEIAESDVK	2	2	CID		82.4684	2.01634	0	1	2	1332.69	-0.602998	2883	2883	54.7096	MS2	14/22
	EAELELVKEEAK	2	2	CID		16.0288	0.724777	0	1	3	1387.73	0.752657	1872	1872	42.6738	MS2	10/44
	DELPSEIKAK	1	1	CID		2.9065	0.629031	0	1	2	1129.61	-0.324561	2613	2613	51.3529	MS2	5/18
	EEAKESRnEGTIKQAK	1	1	CID	N8(Deamidated)	3.99042	0.461272	0	1	2	1818.91	-7.86275	4040	4040	68.7507	MS2	5/30
gi182684113	6.08	10	1908	6.97683	immunoglobulin A1 protease [Streptococcus pneumoniae CGSP14]
	Sequence	# Proteins	# Protein Groups	Activation Type	Modifications	Probability	XCorr	Δ Score	Rank	Charge	MH+ [Da]	ΔM [ppm]	First Scan	Last Scan	RT [min]	MSOrder	Ions Matched	Annotation
	DVQSGAIVEPAIQPELPEAVVSDK	8	4	CID		8.29222	2.65534	0	1	2	2491.29	1.47575	3808	3808	65.7859	MS2	13/46
	DVQSGAIVEPAIQPELPEAVVSDK	8	4	CID		2.92205	2.25372	0	1	3	2491.29	-0.979101	3681	3681	64.1693	MS2	22/92
	DVQSGAIVEPAIQPELPEAVVSDK	8	4	CID		12.6492	2.06776	0	1	2	2491.3	5.62614	3558	3558	62.7477	MS2	12/46
	GEPAVQPELPEAVVSDK	2	2	CID		10.7176	1.12836	0	1	2	1764.9	1.60247	2541	2541	50.4079	MS2	9/32
	GEPAVQPELPEAVVSDK	2	2	CID		15.1785	0.994707	0	1	2	1764.9	-0.228584	3048	3048	56.6951	MS2	7/32
	TGVNTLNPQDEVLSGQLNKPELLYR	12	6	CID		10.4475	0.990833	0	1	3	2798.47	0.189747	3613	3613	63.3723	MS2	11/96
	GIGGLVSKVDnSRISnSSFTGR	2	2	CID	N11(Deamidated) N16(Deamidated)	2.30053	0.805712	0	1	2	2253.14	-10.7952	2736	2736	52.9074	MS2	5/42
	YRSSEYPKGEKLnK	1	1	CID	N13(Deamidated)	4.7824	0.693583	0	1	2	1699.86	-2.18673	2262	2262	47.1981	MS2	4/26
	FVEDNAKEAAKRFR	1	1	CID		2.41366	0.662462	0	1	3	1680.89	11.0741	2680	2680	52.2182	MS2	9/52
	FVEDNAKEAAKRFR	1	1	CID		4.04433	0.575749	0.70034	2	2	1680.89	11.0265	2542	2542	50.4139	MS2	6/26
gi225861379	11.59	12	1873	6.25513	G5 domain family [Streptococcus pneumoniae Taiwan19F-14]
	Sequence	# Proteins	# Protein Groups	Activation Type	Modifications	Probability	XCorr	Δ Score	Rank	Charge	MH+ [Da]	ΔM [ppm]	First Scan	Last Scan	RT [min]	MSOrder	Ions Matched	Annotation
	DGVSPTVTVENNNDGTHVVTITNPDGSK	2	1	CID		5.78359	2.34034	0	1	3	2867.37	2.60484	2260	2260	47.1864	MS2	15/108
	AATATTTENPDGSHTVTITNPDGTK	5	3	CID		55.0171	2.23274	0	1	2	2500.18	0.34208	1279	1279	35.9777	MS2	17/48
	DNGDGTHTITVQNPDGSESTTVVK	4	2	CID		37.9172	1.68205	0	1	2	2472.15	3.56591	1576	1576	39.3348	MS2	11/46
	VSVEDnGDGSHTITIInSDGTVTKTVIKDGK	4	2	CID	N6(Deamidated) N17(Deamidated)	3.76287	0.976766	0	1	3	3202.61	18.6801	3485	3485	61.7679	MS2	14/120
	GEqGNPGTPGKDGKSLIAVK	3	2	CID	Q3(Deamidated)	2.76138	0.873128	0	1	3	1954.01	-9.72989	1847	1847	42.4088	MS2	12/76
	ImqIGVAKDLIDTVKPRVDqnK	2	2	CID	M2(Oxidation) Q3(Deamidated) Q20(Deamidated) N21(Deamidated)	20.6545	0.670963	0	1	6	2500.36	24.2562	898	898	31.317	MS2	39/210
	DGAKGEKGVqGERGLTGAQGQAGR	1	1	CID	Q10(Deamidated)	11.2225	0.542781	0	1	2	2328.17	4.01975	2044	2044	44.5554	MS2	5/46
	nNGNWDKEGnIKGPKGDK	5	3	CID	N1(Deamidated) N10(Deamidated)	3.64698	0.52326	0.167388	2	3	1972.92	-14.7145	5364	5364	92.3033	MS2	21/68
	NnGNWDKEGnIKGPKGDK	5	3	CID	N2(Deamidated) N10(Deamidated)	3.64698	0.52326	0.167388	3	3	1972.92	-14.7145	5364	5364	92.3033	MS2	21/68
	NNGnWDKEGnIKGPKGDK	5	3	CID	N4(Deamidated) N10(Deamidated)	3.64698	0.520765	0.171358	4	3	1972.92	-14.7145	5364	5364	92.3033	MS2	21/68
	ImqIGVAKDLIDTVKPRVDqnK	2	2	CID	M2(Oxidation) Q3(Deamidated) Q20(Deamidated) N21(Deamidated)	4.50139	0.518041	0.330768	4	5	2500.36	23.7203	929	929	31.7282	MS2	23/168
	DGAQGPKGEqGNPGTPGKDGK	1	1	CID	Q10(Deamidated)	5.31643	0.515236	0.789918	2	2	1995.94	2.49928	2906	2906	54.9674	MS2	6/40
gi116515899	10.47	16	2551	6.17838	G5 domain-containing protein [Streptococcus pneumoniae D39]
	Sequence	# Proteins	# Protein Groups	Activation Type	Modifications	Probability	XCorr	Δ Score	Rank	Charge	MH+ [Da]	ΔM [ppm]	First Scan	Last Scan	RT [min]	MSOrder	Ions Matched	Annotation
	DELVQTTVVK	3	2	CID		45.3089	2.26358	0	1	2	1131.63	0.0266503	1462	1462	37.9973	MS2	14/18
	AATATTTENPDGSHTVTITNPDGTK	5	3	CID		55.0171	2.23274	0	1	2	2500.18	0.34208	1279	1279	35.9777	MS2	17/48
	DNGDGTHTITVQNPDGSESTTVVK	4	2	CID		37.9172	1.68205	0	1	2	2472.15	3.56591	1576	1576	39.3348	MS2	11/46
	DGFTPEVTVTDNNNGTHTITITQPDNRPSLTTIVK	3	2	CID		12.5249	1.24041	0	1	3	3796.9	-2.37174	3780	3780	65.408	MS2	18/136
	VSVEDnGDGSHTITIInSDGTVTKTVIKDGK	4	2	CID	N6(Deamidated) N17(Deamidated)	3.76287	0.976766	0	1	3	3202.61	18.6801	3485	3485	61.7679	MS2	14/120
	GEqGNPGTPGKDGKSLIAVK	3	2	CID	Q3(Deamidated)	2.76138	0.873128	0	1	3	1954.01	-9.72989	1847	1847	42.4088	MS2	12/76
	GEqGLQGRDGEQGPKGEDGK	2	1	CID	Q3(Deamidated)	5.25445	0.76347	0	1	2	2042.95	11.9011	782	782	29.9686	MS2	4/38
	GEQGLQGRDGEqGPKGEDGK	2	1	CID	Q12(Deamidated)	11.9083	0.733858	0.0387865	2	2	2042.95	11.9011	782	782	29.9686	MS2	5/38
	GEQGLqGRDGEQGPKGEDGK	2	1	CID	Q6(Deamidated)	5.25445	0.69306	0.0922239	3	2	2042.95	11.9011	782	782	29.9686	MS2	4/38
	GEKGDqGERGLTGAqGEKGAQGQAGR	1	1	CID	Q6(Deamidated) Q15(Deamidated)	6.02422	0.676603	0	1	2	2544.18	-24.2165	3393	3393	60.7736	MS2	8/50
	ImqIGVAKDLIDTVKPRVDqnK	2	2	CID	M2(Oxidation) Q3(Deamidated) Q20(Deamidated) N21(Deamidated)	20.6545	0.670963	0	1	6	2500.36	24.2562	898	898	31.317	MS2	39/210
	nNGNWDKEGnIKGPKGDK	5	3	CID	N1(Deamidated) N10(Deamidated)	3.64698	0.52326	0.167388	2	3	1972.92	-14.7145	5364	5364	92.3033	MS2	21/68
	NnGNWDKEGnIKGPKGDK	5	3	CID	N2(Deamidated) N10(Deamidated)	3.64698	0.52326	0.167388	3	3	1972.92	-14.7145	5364	5364	92.3033	MS2	21/68
	NNGnWDKEGnIKGPKGDK	5	3	CID	N4(Deamidated) N10(Deamidated)	3.64698	0.520765	0.171358	4	3	1972.92	-14.7145	5364	5364	92.3033	MS2	21/68
	ImqIGVAKDLIDTVKPRVDqnK	2	2	CID	M2(Oxidation) Q3(Deamidated) Q20(Deamidated) N21(Deamidated)	4.50139	0.518041	0.330768	4	5	2500.36	23.7203	929	929	31.7282	MS2	23/168
	NNGNWDKEGNIKGSKGDK	2	1	CID		9.7906	0.50153	0.717858	5	2	1960.93	-19.2152	2014	2014	44.2528	MS2	4/34
gi225859446	12.57	10	947	6.09023	neuraminidase [Streptococcus pneumoniae 70585]
	Sequence	# Proteins	# Protein Groups	Activation Type	Modifications	Probability	XCorr	Δ Score	Rank	Charge	MH+ [Da]	ΔM [ppm]	First Scan	Last Scan	RT [min]	MSOrder	Ions Matched	Annotation
	DLENVETVIEKEDVETNASNGQR	12	4	CID		84.9045	2.56951	0	1	2	2589.22	-2.92433	3175	3175	58.1731	MS2	16/44
	DLENVETVIEK	13	5	CID		16.9931	1.88944	0	1	2	1288.66	0.348447	2689	2689	52.348	MS2	11/20
	TLLFAVDKEDIGQEIIGIAK	10	4	CID		3.45354	1.84477	0	1	3	2173.21	-1.46414	4534	4534	76.3326	MS2	16/76
	VDLSSELDK	13	5	CID		28.6985	1.63128	0	1	2	1005.51	-0.911533	1725	1725	41.0016	MS2	10/16
	TWSAPQDITPmVK	12	4	CID	M11(Oxidation)	6.90698	1.29134	0.617438	2	2	1489.73	-9.0062	4071	4071	69.3206	MS2	9/24
	VDLSSELDKLK	13	5	CID		4.27637	1.11698	0	1	3	1246.69	1.52306	3005	3005	56.1817	MS2	12/40
	DVYVQMSAIHTmHnGK	6	3	CID	M12(Oxidation) N14(Deamidated)	14.915	0.788002	0	1	2	1847.86	14.2082	1764	1764	41.4487	MS2	7/30
	RAqNTESTVVqLnnGDVK	12	4	CID	Q3(Deamidated) Q11(Deamidated) N13(Deamidated) N14(Deamidated)	3.17027	0.729521	0	1	2	1976.96	14.6866	2753	2753	53.0902	MS2	5/34
	RAQnTESTVVqLnnGDVK	12	4	CID	N4(Deamidated) Q11(Deamidated) N13(Deamidated) N14(Deamidated)	3.17027	0.728778	0.00101868	2	2	1976.96	14.6866	2753	2753	53.0902	MS2	5/34
	RYPqVKDVYVQmSAIHTmHNGKEYIILSnAGGPK	2	2	CID	Q4(Deamidated) M12(Oxidation) M18(Oxidation) N29(Deamidated)	30.8822	0.530608	0	1	3	3878.92	-2.24522	2186	2186	46.2848	MS2	14/132
gi182684635	6.22	6	980	6.09023	sialidase A precursor (neuraminidase A) [Streptococcus pneumoniae CGSP14]
	Sequence	# Proteins	# Protein Groups	Activation Type	Modifications	Probability	XCorr	Δ Score	Rank	Charge	MH+ [Da]	ΔM [ppm]	First Scan	Last Scan	RT [min]	MSOrder	Ions Matched	Annotation
	DLENVETVIEKEDVETNASNGQR	12	4	CID		84.9045	2.56951	0	1	2	2589.22	-2.92433	3175	3175	58.1731	MS2	16/44
	DLENVETVIEK	13	5	CID		16.9931	1.88944	0	1	2	1288.66	0.348447	2689	2689	52.348	MS2	11/20
	TLLFAVDKEDIGQEIIGIAK	10	4	CID		3.45354	1.84477	0	1	3	2173.21	-1.46414	4534	4534	76.3326	MS2	16/76
	VDLSSELDK	13	5	CID		28.6985	1.63128	0	1	2	1005.51	-0.911533	1725	1725	41.0016	MS2	10/16
	VDLSSELDKLK	13	5	CID		4.27637	1.11698	0	1	3	1246.69	1.52306	3005	3005	56.1817	MS2	12/40
	DKGNLYK	1	1	CID		14.405	0.678968	0	1	2	837.449	2.80608	3343	3343	60.2213	MS2	6/12
gi169833592	12.95	10	942	6.09023	neuraminidase [Streptococcus pneumoniae Hungary19A-6]
	Sequence	# Proteins	# Protein Groups	Activation Type	Modifications	Probability	XCorr	Δ Score	Rank	Charge	MH+ [Da]	ΔM [ppm]	First Scan	Last Scan	RT [min]	MSOrder	Ions Matched	Annotation
	DLENVETVIEKEDVETNASNGQR	12	4	CID		84.9045	2.56951	0	1	2	2589.22	-2.92433	3175	3175	58.1731	MS2	16/44
	DLENVETVIEK	13	5	CID		16.9931	1.88944	0	1	2	1288.66	0.348447	2689	2689	52.348	MS2	11/20
	TLLFAVDKEDIGQEIIGIAK	10	4	CID		3.45354	1.84477	0	1	3	2173.21	-1.46414	4534	4534	76.3326	MS2	16/76
	VDLSSELDK	13	5	CID		28.6985	1.63128	0	1	2	1005.51	-0.911533	1725	1725	41.0016	MS2	10/16
	TWSAPQDITPmVK	12	4	CID	M11(Oxidation)	6.90698	1.29134	0.617438	2	2	1489.73	-9.0062	4071	4071	69.3206	MS2	9/24
	RANNTVWGSNLQIRnLTVYnR	10	3	CID	N15(Deamidated) N20(Deamidated)	4.28177	1.27503	0.519825	5	2	2491.29	14.1038	3808	3808	65.7859	MS2	6/40
	VDLSSELDKLK	13	5	CID		4.27637	1.11698	0	1	3	1246.69	1.52306	3005	3005	56.1817	MS2	12/40
	DVYVQMSAIHTmHnGK	6	3	CID	M12(Oxidation) N14(Deamidated)	14.915	0.788002	0	1	2	1847.86	14.2082	1764	1764	41.4487	MS2	7/30
	RAqNTESTVVqLnnGDVK	12	4	CID	Q3(Deamidated) Q11(Deamidated) N13(Deamidated) N14(Deamidated)	3.17027	0.729521	0	1	2	1976.96	14.6866	2753	2753	53.0902	MS2	5/34
	RAQnTESTVVqLnnGDVK	12	4	CID	N4(Deamidated) Q11(Deamidated) N13(Deamidated) N14(Deamidated)	3.17027	0.728778	0.00101868	2	2	1976.96	14.6866	2753	2753	53.0902	MS2	5/34
gi15903579	9.37	9	1035	6.09023	sialidase A precursor (neuraminidase A) [Streptococcus pneumoniae R6]
	Sequence	# Proteins	# Protein Groups	Activation Type	Modifications	Probability	XCorr	Δ Score	Rank	Charge	MH+ [Da]	ΔM [ppm]	First Scan	Last Scan	RT [min]	MSOrder	Ions Matched	Annotation
	DLENVETVIEKEDVETNASNGQR	12	4	CID		84.9045	2.56951	0	1	2	2589.22	-2.92433	3175	3175	58.1731	MS2	16/44
	DLENVETVIEK	13	5	CID		16.9931	1.88944	0	1	2	1288.66	0.348447	2689	2689	52.348	MS2	11/20
	VDLSSELDK	13	5	CID		28.6985	1.63128	0	1	2	1005.51	-0.911533	1725	1725	41.0016	MS2	10/16
	TWSAPQDITPmVK	12	4	CID	M11(Oxidation)	6.90698	1.29134	0.617438	2	2	1489.73	-9.0062	4071	4071	69.3206	MS2	9/24
	RANNTVWGSNLQIRnLTVYnR	10	3	CID	N15(Deamidated) N20(Deamidated)	4.28177	1.27503	0.519825	5	2	2491.29	14.1038	3808	3808	65.7859	MS2	6/40
	VDLSSELDKLK	13	5	CID		4.27637	1.11698	0	1	3	1246.69	1.52306	3005	3005	56.1817	MS2	12/40
	DIDIERnSMnR	1	1	CID	N7(Deamidated) N10(Deamidated)	11.2591	1.11566	0	1	2	1364.6	-13.5615	3012	3012	56.2497	MS2	6/20
	RAqNTESTVVqLnnGDVK	12	4	CID	Q3(Deamidated) Q11(Deamidated) N13(Deamidated) N14(Deamidated)	3.17027	0.729521	0	1	2	1976.96	14.6866	2753	2753	53.0902	MS2	5/34
	RAQnTESTVVqLnnGDVK	12	4	CID	N4(Deamidated) Q11(Deamidated) N13(Deamidated) N14(Deamidated)	3.17027	0.728778	0.00101868	2	2	1976.96	14.6866	2753	2753	53.0902	MS2	5/34
gi307127722	19.38	2	160	6.00676	transcription elongation factor GreA [Streptococcus pneumoniae 670-6B]
	Sequence	# Proteins	# Protein Groups	Activation Type	Modifications	Probability	XCorr	Δ Score	Rank	Charge	MH+ [Da]	ΔM [ppm]	First Scan	Last Scan	RT [min]	MSOrder	Ions Matched	Annotation
	SYGDLSENSEYEAAKDEQAFVEGQISSLETK	4	1	CID		86.7164	4.01035	0	1	3	3424.56	0.44588	4410	4410	74.3274	MS2	32/120
	DEQAFVEGQISSLETK	4	1	CID		58.0922	1.99641	0	1	2	1780.86	0.612002	3412	3412	60.9737	MS2	13/30
gi182683090	7.06	10	609	5.60288	pneumococcal surface protein A [Streptococcus pneumoniae CGSP14]
	Sequence	# Proteins	# Protein Groups	Activation Type	Modifications	Probability	XCorr	Δ Score	Rank	Charge	MH+ [Da]	ΔM [ppm]	First Scan	Last Scan	RT [min]	MSOrder	Ions Matched	Annotation
	IAELENqVHR	2	1	CID	Q7(Deamidated)	41.8051	2.98673	0	2	2	1209.62	-0.0373184	1222	1222	35.2255	MS2	16/18
	IAELEnQVHR	2	1	CID	N6(Deamidated)	41.8051	2.87765	0.0365222	3	2	1209.62	-0.0373184	1222	1222	35.2255	MS2	16/18
	IAELENqVHR	2	1	CID	Q7(Deamidated)	63.6913	2.61615	0	1	3	1209.62	0.162858	1178	1178	34.7502	MS2	25/36
	IAELEnQVHR	2	1	CID	N6(Deamidated)	63.6913	2.4519	0.0627805	3	3	1209.62	0.162858	1178	1178	34.7502	MS2	25/36
	IAELENqVHR	2	1	CID	Q7(Deamidated)	11.0087	1.29428	0	2	3	1209.62	-0.661116	1713	1713	40.8633	MS2	14/36
	IAELEnQVHR	2	1	CID	N6(Deamidated)	11.0087	1.14573	0.114768	3	3	1209.62	-0.661116	1713	1713	40.8633	MS2	14/36
	QKVDAAKqK	1	1	CID	Q8(Deamidated)	15.248	0.563797	0	1	2	1016.58	3.35356	4010	4010	68.2711	MS2	5/16
	EGLEKTTAEKK	2	2	CID		5.68458	0.539843	0	1	2	1233.67	6.03685	3371	3371	60.5118	MS2	5/20
	IAELENqVHR	2	1	CID	Q7(Deamidated)	2.54836	0.481326	0.185586	3	3	1209.62	0.620622	2006	2006	44.1684	MS2	6/36
	AEAAQRKYDEDQK	1	1	CID		3.99226	0.451975	0.40012	2	2	1551.73	-7.86011	3729	3729	64.7025	MS2	6/24
gi307128212	20.9	4	335	5.27141	glyceraldehyde-3-phosphate dehydrogenase, type I [Streptococcus pneumoniae 670-6B]
	Sequence	# Proteins	# Protein Groups	Activation Type	Modifications	Probability	XCorr	Δ Score	Rank	Charge	MH+ [Da]	ΔM [ppm]	First Scan	Last Scan	RT [min]	MSOrder	Ions Matched	Annotation
	VPTPTGSVTELVAVLEK	6	1	CID		51.5855	2.9712	0	1	2	1739.98	2.21747	4710	4710	79.3004	MS2	17/32
	AASNESYGYTEDPIVSSDIVGmSYGSLFDATQTK	6	1	CID	M22(Oxidation)	54.3966	2.30021	0	1	3	3619.63	0.0720125	4329	4329	73.0875	MS2	25/132
	IqnVEGVEVTR	6	1	CID	Q2(Deamidated) N3(Deamidated)	4.07458	0.806468	0	1	2	1245.63	0.554728	2321	2321	47.9108	MS2	7/20
	IGRLAFRR	6	1	CID		12.3322	0.539767	0	1	2	988.623	6.56007	2704	2704	52.5366	MS2	6/14
gi307128357	16.81	2	232	5.02817	tetrahydrodipicolinate N-succinyltransferase [Streptococcus pneumoniae 670-6B]
	Sequence	# Proteins	# Protein Groups	Activation Type	Modifications	Probability	XCorr	Δ Score	Rank	Charge	MH+ [Da]	ΔM [ppm]	First Scan	Last Scan	RT [min]	MSOrder	Ions Matched	Annotation
	DVAPLLEGLVENQDYVVEQDAR	5	1	CID		71.9024	2.6997	0	1	2	2472.23	6.34575	4652	4652	78.2243	MS2	17/42
	EIDAqTQQKTALEDALR	5	1	CID	Q5(Deamidated)	4.57042	0.91027	0.589004	8	3	1930.99	15.4995	4529	4529	76.2667	MS2	13/64
gi307127341	10.6	3	434	4.53524	phosphopyruvate hydratase [Streptococcus pneumoniae 670-6B]
	Sequence	# Proteins	# Protein Groups	Activation Type	Modifications	Probability	XCorr	Δ Score	Rank	Charge	MH+ [Da]	ΔM [ppm]	First Scan	Last Scan	RT [min]	MSOrder	Ions Matched	Annotation
	FEGTEDGVETILAAIEAAGYVPGK	2	1	CID		67.3026	2.39626	0	1	2	2437.21	-5.87417	5043	5043	86.0793	MS2	14/46
	SGETEDSTIADIAVATNAGQIK	2	1	CID		22.0963	2.13898	0	1	2	2191.07	-0.990498	3184	3184	58.287	MS2	13/42
	SGETEDSTIADIAVATNAGQIK	2	1	CID		15.5755	1.6858	0	1	3	2191.08	2.59713	3189	3189	58.3304	MS2	18/84
gi221232258	6.26	8	1774	4.49633	collagen-like surface-anchored protein [Streptococcus pneumoniae ATCC 700669]
	Sequence	# Proteins	# Protein Groups	Activation Type	Modifications	Probability	XCorr	Δ Score	Rank	Charge	MH+ [Da]	ΔM [ppm]	First Scan	Last Scan	RT [min]	MSOrder	Ions Matched	Annotation
	DELVQTTVVK	3	2	CID		45.3089	2.26358	0	1	2	1131.63	0.0266503	1462	1462	37.9973	MS2	14/18
	AATATTTENPDGSHTVTITNPDGTK	5	3	CID		55.0171	2.23274	0	1	2	2500.18	0.34208	1279	1279	35.9777	MS2	17/48
	DGFTPEVTVTDNNNGTHTITITQPDNRPSLTTIVK	3	2	CID		12.5249	1.24041	0	1	3	3796.9	-2.37174	3780	3780	65.408	MS2	18/136
	GEKGEQGFQGRDGEqGPKGEDGK	1	1	CID	Q15(Deamidated)	3.81957	0.601331	0.598852	2	2	2391.1	18.2914	1343	1343	36.6809	MS2	7/44
	GEKGEqGFqGRDGEQGPKGEDGK	1	1	CID	Q6(Deamidated) Q9(Deamidated)	5.11147	0.554171	0.485074	2	3	2392.05	-19.5711	1586	1586	39.4471	MS2	12/88
	nNGNWDKEGnIKGPKGDK	5	3	CID	N1(Deamidated) N10(Deamidated)	3.64698	0.52326	0.167388	2	3	1972.92	-14.7145	5364	5364	92.3033	MS2	21/68
	NnGNWDKEGnIKGPKGDK	5	3	CID	N2(Deamidated) N10(Deamidated)	3.64698	0.52326	0.167388	3	3	1972.92	-14.7145	5364	5364	92.3033	MS2	21/68
	NNGnWDKEGnIKGPKGDK	5	3	CID	N4(Deamidated) N10(Deamidated)	3.64698	0.520765	0.171358	4	3	1972.92	-14.7145	5364	5364	92.3033	MS2	21/68
gi307126804	10.58	2	293	4.2391	fructose-1,6-bisphosphate aldolase, class II [Streptococcus pneumoniae 670-6B]
	Sequence	# Proteins	# Protein Groups	Activation Type	Modifications	Probability	XCorr	Δ Score	Rank	Charge	MH+ [Da]	ΔM [ppm]	First Scan	Last Scan	RT [min]	MSOrder	Ions Matched	Annotation
	GISVEAEVGTIGGEEDGIIGK	1	1	CID		82.776	2.53728	0	1	2	2030.03	-0.441318	3597	3597	63.2058	MS2	21/40
	GELAPIEDAK	1	1	CID		9.84859	1.70181	0	1	2	1042.54	0.946768	1365	1365	36.9152	MS2	10/18
gi307126444	16.29	1	178	4.10063	50S ribosomal protein L6 [Streptococcus pneumoniae 670-6B]
	Sequence	# Proteins	# Protein Groups	Activation Type	Modifications	Probability	XCorr	Δ Score	Rank	Charge	MH+ [Da]	ΔM [ppm]	First Scan	Last Scan	RT [min]	MSOrder	Ions Matched	Annotation
	SHPDEVEAPEGITFELPNPTTIVVSGISK	6	1	CID		40.5777	4.10063	0	1	3	3063.55	-1.66004	4779	4779	80.3937	MS2	33/112
gi307127077	44.26	3	122	4.07181	50S ribosomal protein L7/L12 [Streptococcus pneumoniae 670-6B]
	Sequence	# Proteins	# Protein Groups	Activation Type	Modifications	Probability	XCorr	Δ Score	Rank	Charge	MH+ [Da]	ΔM [ppm]	First Scan	Last Scan	RT [min]	MSOrder	Ions Matched	Annotation
	AIEEEFGVTAAAPVAVAAADAADAGAAK	2	1	CID		30.3146	1.90658	0	1	2	2557.28	-0.0875294	3976	3976	67.8508	MS2	15/54
	DSFDVELTSAGDKK	2	1	CID		4.80663	1.42197	0	1	3	1511.72	1.19566	2002	2002	44.1207	MS2	15/52
	EGVATAEAEEIK	2	1	CID		14.2689	0.626858	0	1	2	1246.62	0.413447	1243	1243	35.5212	MS2	7/22
gi307126945	18.34	4	398	3.921	translation elongation factor Tu [Streptococcus pneumoniae 670-6B]
	Sequence	# Proteins	# Protein Groups	Activation Type	Modifications	Probability	XCorr	Δ Score	Rank	Charge	MH+ [Da]	ΔM [ppm]	First Scan	Last Scan	RT [min]	MSOrder	Ions Matched	Annotation
	DYASIDAAPEER	2	1	CID		44.9962	2.2788	0	1	2	1336.6	-0.123272	1400	1400	37.2807	MS2	13/22
	YEDIVmELmNTVDEYIPEPER	2	1	CID	M6(Oxidation) M9(Oxidation)	67.5356	1.6422	0	1	2	2617.16	-6.61847	5047	5047	86.1588	MS2	14/40
	VNDEIEIVGIKEETQK	2	1	CID		23.7416	1.13022	0	1	2	1843.96	-0.560303	2472	2472	49.6244	MS2	10/30
	GVQRDEIERGQVIAKPGSINPHTK	2	1	CID		4.99816	0.742183	0	1	5	2629.41	-2.19912	4837	4837	81.4764	MS2	23/184
gi307128353	9.03	1	299	3.55226	UTP-glucose-1-phosphate uridylyltransferase [Streptococcus pneumoniae 670-6B]
	Sequence	# Proteins	# Protein Groups	Activation Type	Modifications	Probability	XCorr	Δ Score	Rank	Charge	MH+ [Da]	ΔM [ppm]	First Scan	Last Scan	RT [min]	MSOrder	Ions Matched	Annotation
	DGLYSVETFVEKPAPEDAPSDLAIIGR	5	1	CID		85.3782	3.55226	0	1	3	2889.45	-0.463202	4241	4241	71.7824	MS2	30/104
gi194397355	13.59	10	942	3.52072	neuraminidase A [Streptococcus pneumoniae G54]
	Sequence	# Proteins	# Protein Groups	Activation Type	Modifications	Probability	XCorr	Δ Score	Rank	Charge	MH+ [Da]	ΔM [ppm]	First Scan	Last Scan	RT [min]	MSOrder	Ions Matched	Annotation
	DLENVETVIEK	13	5	CID		16.9931	1.88944	0	1	2	1288.66	0.348447	2689	2689	52.348	MS2	11/20
	TLLFAVDKEDIGQEIIGIAK	10	4	CID		3.45354	1.84477	0	1	3	2173.21	-1.46414	4534	4534	76.3326	MS2	16/76
	VDLSSELDK	13	5	CID		28.6985	1.63128	0	1	2	1005.51	-0.911533	1725	1725	41.0016	MS2	10/16
	TWSAPQDITPmVK	12	4	CID	M11(Oxidation)	6.90698	1.29134	0.617438	2	2	1489.73	-9.0062	4071	4071	69.3206	MS2	9/24
	RANNTVWGSNLQIRnLTVYnR	10	3	CID	N15(Deamidated) N20(Deamidated)	4.28177	1.27503	0.519825	5	2	2491.29	14.1038	3808	3808	65.7859	MS2	6/40
	VDLSSELDKLK	13	5	CID		4.27637	1.11698	0	1	3	1246.69	1.52306	3005	3005	56.1817	MS2	12/40
	DVYVQMSAIHTmHnGK	6	3	CID	M12(Oxidation) N14(Deamidated)	14.915	0.788002	0	1	2	1847.86	14.2082	1764	1764	41.4487	MS2	7/30
	RAqNTESTVVqLnnGDVK	12	4	CID	Q3(Deamidated) Q11(Deamidated) N13(Deamidated) N14(Deamidated)	3.17027	0.729521	0	1	2	1976.96	14.6866	2753	2753	53.0902	MS2	5/34
	RAQnTESTVVqLnnGDVK	12	4	CID	N4(Deamidated) Q11(Deamidated) N13(Deamidated) N14(Deamidated)	3.17027	0.728778	0.00101868	2	2	1976.96	14.6866	2753	2753	53.0902	MS2	5/34
	RYPqVKDVYVQmSAIHTmHNGKEYIILSnAGGPK	2	2	CID	Q4(Deamidated) M12(Oxidation) M18(Oxidation) N29(Deamidated)	30.8822	0.530608	0	1	3	3878.92	-2.24522	2186	2186	46.2848	MS2	14/132
gi194397255	6.95	10	1870	3.51272	zinc metalloprotease ZmpB [Streptococcus pneumoniae G54]
	Sequence	# Proteins	# Protein Groups	Activation Type	Modifications	Probability	XCorr	Δ Score	Rank	Charge	MH+ [Da]	ΔM [ppm]	First Scan	Last Scan	RT [min]	MSOrder	Ions Matched	Annotation
	VEEGKEDSAEPAPVEEVGGEVESKPEEK	10	9	CID		81.8654	3.51272	0	1	3	2983.39	1.35649	1816	1816	42.0263	MS2	26/108
	VEEGKEDSAEPAPVEEVGGEVESKPEEK	10	9	CID		64.8693	1.91528	0	1	4	2983.39	2.07546	1856	1856	42.4997	MS2	51/162
	VATPIRELFGPTDRWHQINWNMGAMAK	1	1	CID		3.9272	1.40491	0	1	4	3139.56	-12.1282	3450	3450	61.3777	MS2	21/156
	AVEADxAGGGTAK	1	1	CID	X6(L)	5.60073	1.15678	0	1	2	1159.61	10.9495	4093	4093	69.5887	MS2	7/24
	nKRHRVFDGLNNNMHAR	1	1	CID	N1(Deamidated)	2.5506	0.79482	0	1	2	2080.03	-1.71759	1652	1652	40.1322	MS2	6/32
	DGAIKKSVVK	2	2	CID		6.87389	0.759668	0	1	2	1044.65	9.93935	2402	2402	48.7755	MS2	9/18
	SVSPKPTSNVEqVK	1	1	CID	Q12(Deamidated)	4.74918	0.551669	0.273945	4	2	1500.78	-6.61622	2268	2268	47.2582	MS2	4/26
	VLFDKAVEADxAGGGTAKTVELK	1	1	CID	X11(L)	3.5665	0.542908	0	1	4	2332.27	-10.7118	690	690	28.7118	MS2	18/132
	SVSPKPTSnVEQVK	1	1	CID	N9(Deamidated)	4.74918	0.446671	0.412134	5	2	1500.78	-6.61622	2268	2268	47.2582	MS2	3/26
	qVAqEGVNGKK	4	4	CID	Q1(Deamidated) Q4(Deamidated)	2.02682	0.412772	0.643171	6	2	1159.61	10.9675	4093	4093	69.5887	MS2	4/20
gi15900565	2.07	5	1881	3.51272	zinc metalloprotease ZmpB, [Streptococcus pneumoniae TIGR4]
	Sequence	# Proteins	# Protein Groups	Activation Type	Modifications	Probability	XCorr	Δ Score	Rank	Charge	MH+ [Da]	ΔM [ppm]	First Scan	Last Scan	RT [min]	MSOrder	Ions Matched	Annotation
	VEEGKEDSAEPAPVEEVGGEVESKPEEK	10	9	CID		81.8654	3.51272	0	1	3	2983.39	1.35649	1816	1816	42.0263	MS2	26/108
	VEEGKEDSAEPAPVEEVGGEVESKPEEK	10	9	CID		64.8693	1.91528	0	1	4	2983.39	2.07546	1856	1856	42.4997	MS2	51/162
	SWQnLQTEVTK	1	1	CID	N4(Deamidated)	3.18368	0.720946	0.201261	2	2	1334.66	0.021705	4411	4411	74.3335	MS2	4/20
	SWqNLQTEVTK	1	1	CID	Q3(Deamidated)	3.18368	0.593966	0.341943	3	2	1334.66	0.021705	4411	4411	74.3335	MS2	3/20
	SWQNLqTEVTK	1	1	CID	Q6(Deamidated)	3.18368	0.475313	0.473399	5	2	1334.66	0.021705	4411	4411	74.3335	MS2	4/20
gi307067830	12.02	2	574	3.45565	PTS system phosphoenolpyruvate-protein kinase [Streptococcus pneumoniae AP200]
	Sequence	# Proteins	# Protein Groups	Activation Type	Modifications	Probability	XCorr	Δ Score	Rank	Charge	MH+ [Da]	ΔM [ppm]	First Scan	Last Scan	RT [min]	MSOrder	Ions Matched	Annotation
	AYLLVQPDLSFETITVEDTNAEEAR	5	1	CID		76.7354	3.45565	0	1	3	2824.4	10.0676	4507	4507	75.8849	MS2	25/96
	DGDILAVnGITGEVIINPTDEqAAEFKAAGEAYAKqKAEWALLK	4	1	CID	N8(Deamidated) Q22(Deamidated) Q36(Deamidated)	5.3645	1.05271	0.313678	3	6	4661.35	-1.76025	4627	4627	77.8607	MS2	44/430
gi182684590	5.85	4	650	3.38902	endopeptidase O [Streptococcus pneumoniae CGSP14]
	Sequence	# Proteins	# Protein Groups	Activation Type	Modifications	Probability	XCorr	Δ Score	Rank	Charge	MH+ [Da]	ΔM [ppm]	First Scan	Last Scan	RT [min]	MSOrder	Ions Matched	Annotation
	AYDFSDEEIEDLLEK	9	1	CID		104.444	3.38902	0	1	2	1815.82	-0.829522	4296	4296	72.5911	MS2	16/28
	MHSLVIFVKInAnTNESENKMTR	1	1	CID	N11(Deamidated) N13(Deamidated)	3.26898	1.15737	0	1	2	2678.32	-6.1925	4552	4552	76.6029	MS2	6/44
	MHSLVIFVKInANTnESENKMTR	1	1	CID	N11(Deamidated) N15(Deamidated)	3.26898	1.00752	0.129477	3	2	2678.32	-6.1925	4552	4552	76.6029	MS2	6/44
	MHSLVIFVKINAnTnESENKMTR	1	1	CID	N13(Deamidated) N15(Deamidated)	3.26898	0.996473	0.139019	5	2	2678.32	-6.1925	4552	4552	76.6029	MS2	6/44
gi225859256	6.99	2	572	3.35604	phosphomannomutase [Streptococcus pneumoniae 70585]
	Sequence	# Proteins	# Protein Groups	Activation Type	Modifications	Probability	XCorr	Δ Score	Rank	Charge	MH+ [Da]	ΔM [ppm]	First Scan	Last Scan	RT [min]	MSOrder	Ions Matched	Annotation
	AIENPFAVEVADVEIEK	1	1	CID		122.362	3.35604	0	1	2	1872.96	-1.10796	4272	4272	72.2182	MS2	21/32
	HLNCFAGImVTASHNPAPFNGYK	1	1	CID	M9(Oxidation)	6.60224	0.412157	0	1	2	2505.2	19.4583	4715	4715	79.3771	MS2	5/44
gi307127193	14.17	6	247	3.24368	sortase [Streptococcus pneumoniae 670-6B]
	Sequence	# Proteins	# Protein Groups	Activation Type	Modifications	Probability	XCorr	Δ Score	Rank	Charge	MH+ [Da]	ΔM [ppm]	First Scan	Last Scan	RT [min]	MSOrder	Ions Matched	Annotation
	LEENQDTEGNFDFDSVK	3	1	CID		110.846	3.24368	0	1	2	1986.86	-0.650811	2502	2502	49.9844	MS2	22/32
	EKLEENQDTEGNFDFDSVK	3	1	CID		34.6369	1.52018	0	1	2	2243.99	-5.16417	2355	2355	48.3134	MS2	9/36
	EKLEENQDTEGNFDFDSVK	3	1	CID		3.99705	1.12376	0	1	3	2243.99	-2.98035	5656	5656	98.4751	MS2	12/72
	LEEnQDTEGNFDFDSVKAISSEAVLTSQWnAqK	1	1	CID	N4(Deamidated) N30(Deamidated) Q32(Deamidated)	4.79573	0.508716	0.802638	5	3	3703.68	4.85065	3564	3564	62.8313	MS2	14/128
	LEEnQDTEGNFDFDSVKAISSEAVLTSqWnAQK	1	1	CID	N4(Deamidated) Q28(Deamidated) N30(Deamidated)	4.79573	0.507249	0.803207	8	3	3703.68	4.85065	3564	3564	62.8313	MS2	14/128
	LEEnQDTEGNFDFDSVKAISSEAVLTSqWNAqK	1	1	CID	N4(Deamidated) Q28(Deamidated) Q32(Deamidated)	4.79573	0.507144	0.803248	9	3	3703.68	4.85065	3564	3564	62.8313	MS2	14/128
gi307068291	8.59	4	419	3.23219	cell division GTPase [Streptococcus pneumoniae AP200]
	Sequence	# Proteins	# Protein Groups	Activation Type	Modifications	Probability	XCorr	Δ Score	Rank	Charge	MH+ [Da]	ΔM [ppm]	First Scan	Last Scan	RT [min]	MSOrder	Ions Matched	Annotation
	FEAPISQDEDELDTPPFFK	4	1	CID		99.1557	3.23219	0	1	2	2225.03	-0.213389	4214	4214	71.4355	MS2	21/36
	FEAPISQDEDELDTPPFFK	4	1	CID		47.9291	1.78469	0	1	3	2225.03	0.200411	4121	4121	69.9945	MS2	22/72
	FEAPISQDEDELDTPPFFK	4	1	CID		51.9215	1.45041	0	1	2	2225.03	1.00731	4421	4421	74.5055	MS2	10/36
	HFDmAETAELPKQNPRR	2	1	CID	M4(Oxidation)	6.84147	0.979261	0.53056	2	2	2055.99	-16.1223	1086	1086	33.6711	MS2	7/32
gi307127349	7.59	3	474	3.10756	NADP-dependent glyceraldehyde-3-phosphate dehydrogenase [Streptococcus pneumoniae 670-6B]
	Sequence	# Proteins	# Protein Groups	Activation Type	Modifications	Probability	XCorr	Δ Score	Rank	Charge	MH+ [Da]	ΔM [ppm]	First Scan	Last Scan	RT [min]	MSOrder	Ions Matched	Annotation
	SSEQEITIYSPINQEELGTVPAMTQTEADEAMQAAR	8	1	CID		80.8184	3.10756	0	1	3	3938.82	-8.13639	4362	4362	73.6161	MS2	26/140
	SSEQEITIYSPINQEELGTVPAMTQTEADEAmQAAR	8	1	CID	M32(Oxidation)	14.7818	1.24529	0	1	3	3954.83	6.95838	4053	4053	68.9706	MS2	15/140
	SSEQEITIYSPINQEELGTVPAmTQTEADEAMQAAR	8	1	CID	M23(Oxidation)	40.313	1.16692	0.0629405	2	3	3954.83	6.95838	4053	4053	68.9706	MS2	14/140
gi307128210	2.46	1	731	3.10477	penicillin-binding protein 2A [Streptococcus pneumoniae 670-6B]
	Sequence	# Proteins	# Protein Groups	Activation Type	Modifications	Probability	XCorr	Δ Score	Rank	Charge	MH+ [Da]	ΔM [ppm]	First Scan	Last Scan	RT [min]	MSOrder	Ions Matched	Annotation
	QVQTNDNSQTDDNLSDIR	11	1	CID		67.8336	3.10477	0	1	2	2062.93	-0.95417	1416	1416	37.4876	MS2	13/34
gi307068146	12.92	3	209	2.9703	polar amino acid ABC transporter ATPase [Streptococcus pneumoniae AP200]
	Sequence	# Proteins	# Protein Groups	Activation Type	Modifications	Probability	XCorr	Δ Score	Rank	Charge	MH+ [Da]	ΔM [ppm]	First Scan	Last Scan	RT [min]	MSOrder	Ions Matched	Annotation
	MLELRNInK	3	1	CID	N8(Deamidated)	7.21265	0.769016	0.660266	2	2	1131.63	6.54065	1462	1462	37.9973	MS2	5/16
	MLELRnINK	3	1	CID	N6(Deamidated)	7.21265	0.622048	0.725193	4	2	1131.63	6.54065	1462	1462	37.9973	MS2	4/16
	VFGDKqILSnFSLSIPEK	2	1	CID	Q6(Deamidated) N10(Deamidated)	5.3131	0.49698	0	1	2	2024.06	5.75742	2353	2353	48.289	MS2	5/34
gi221230965	3.97	1	428	2.89059	adenylosuccinate synthetase [Streptococcus pneumoniae ATCC 700669]
	Sequence	# Proteins	# Protein Groups	Activation Type	Modifications	Probability	XCorr	Δ Score	Rank	Charge	MH+ [Da]	ΔM [ppm]	First Scan	Last Scan	RT [min]	MSOrder	Ions Matched	Annotation
	VGDGPFPTELFDEVGER	4	1	CID		58	2.89059	0	1	2	1863.88	-0.62749	4326	4326	73.0522	MS2	16/32
gi225859717	5.51	6	1198	2.86604	DNA-directed RNA polymerase subunit beta [Streptococcus pneumoniae 70585]
	Sequence	# Proteins	# Protein Groups	Activation Type	Modifications	Probability	XCorr	Δ Score	Rank	Charge	MH+ [Da]	ΔM [ppm]	First Scan	Last Scan	RT [min]	MSOrder	Ions Matched	Annotation
	DLDEGMDEDVIHVDDLEK	8	1	CID		107.421	2.86604	0	1	2	2086.91	0.159814	3216	3216	58.6583	MS2	16/34
	DLDEGmDEDVIHVDDLEK	8	1	CID	M6(Oxidation)	2.67581	0.999538	0	1	3	2102.91	-0.383866	2670	2670	52.0546	MS2	13/68
	NTVEKDIHKnPMDSR	7	1	CID	N10(Deamidated)	2.28132	0.818196	0	1	3	1784.87	8.66299	2157	2157	45.9374	MS2	13/56
	NTVEKDIHK	7	1	CID		3.30776	0.79563	0	1	2	1083.57	-7.39429	3486	3486	61.774	MS2	7/16
	DTKLGPEEITR	8	1	CID		15.8363	0.702025	0.236907	3	2	1258.67	1.75364	2782	2782	53.4024	MS2	6/20
	AVGELLAnqVRLGLSRmERnVR	7	1	CID	N8(Deamidated) Q9(Deamidated) M17(Oxidation) N20(Deamidated)	5.19616	0.681749	0	1	6	2500.35	23.8234	653	653	28.279	MS2	23/210
gi307126450	9.91	1	212	2.8313	adenylate kinase [Streptococcus pneumoniae 670-6B]
	Sequence	# Proteins	# Protein Groups	Activation Type	Modifications	Probability	XCorr	Δ Score	Rank	Charge	MH+ [Da]	ΔM [ppm]	First Scan	Last Scan	RT [min]	MSOrder	Ions Matched	Annotation
	GLVHDIEGNQDINDVFSDIEK	4	1	CID		28.7413	2.8313	0	1	3	2357.12	-2.40717	4133	4133	70.1942	MS2	26/80
gi225858495	10.84	3	332	2.83046	hypothetical protein SP70585_0726 [Streptococcus pneumoniae 70585]
	Sequence	# Proteins	# Protein Groups	Activation Type	Modifications	Probability	XCorr	Δ Score	Rank	Charge	MH+ [Da]	ΔM [ppm]	First Scan	Last Scan	RT [min]	MSOrder	Ions Matched	Annotation
	EGQASTVSSSNDSNSEYSAALGK	3	1	CID		98.8734	2.83046	0	1	2	2289	-6.95917	1334	1334	36.5894	MS2	17/44
	LDRDHDGVACELK	2	1	CID		8.72762	1.01391	0	1	3	1470.69	-14.2873	1487	1487	38.2459	MS2	10/48
	LDRDHDGVACELK	2	1	CID		5.09561	0.422605	0	1	2	1470.69	-13.6941	1522	1522	38.6896	MS2	6/24
gi307126714	10.55	2	398	2.81383	phosphoglycerate kinase [Streptococcus pneumoniae 670-6B]
	Sequence	# Proteins	# Protein Groups	Activation Type	Modifications	Probability	XCorr	Δ Score	Rank	Charge	MH+ [Da]	ΔM [ppm]	First Scan	Last Scan	RT [min]	MSOrder	Ions Matched	Annotation
	GAELEAAINALEDGQVLLVENTR	4	1	CID		48.0312	2.81383	0	1	2	2425.25	-2.35503	5004	5004	85.1659	MS2	17/44
	DTEGEAVSEGFLGLDIGPK	5	1	CID		13.3977	1.50243	0	1	2	1933.95	6.19673	4403	4403	74.2061	MS2	9/36
gi307126587	7.38	3	474	2.79998	6-phosphogluconate dehydrogenase, decarboxylating [Streptococcus pneumoniae 670-6B]
	Sequence	# Proteins	# Protein Groups	Activation Type	Modifications	Probability	XCorr	Δ Score	Rank	Charge	MH+ [Da]	ΔM [ppm]	First Scan	Last Scan	RT [min]	MSOrder	Ions Matched	Annotation
	KDDEDQDGPIVDYILDAAGNK	2	1	CID		34.1464	2.79998	0	1	3	2291.06	-5.93371	4381	4381	73.8744	MS2	21/80
	KDDEDQDGPIVDYILDAAGNK	2	1	CID		6.08226	1.44881	0	1	2	2291.07	-0.0608887	4432	4432	74.6875	MS2	12/40
	GALEGPSImPGGQK	2	1	CID	M9(Oxidation)	19.7612	1.29237	0	1	2	1357.68	1.37466	1322	1322	36.4699	MS2	9/26
gi307128061	7.63	1	354	2.64758	glutamyl aminopeptidase [Streptococcus pneumoniae 670-6B]
	Sequence	# Proteins	# Protein Groups	Activation Type	Modifications	Probability	XCorr	Δ Score	Rank	Charge	MH+ [Da]	ΔM [ppm]	First Scan	Last Scan	RT [min]	MSOrder	Ions Matched	Annotation
	AEAESFGIRPGDTIVPDSSAILTANEK	5	1	CID		23.5604	2.64758	0	1	3	2788.4	1.73729	3664	3664	63.9608	MS2	30/104
gi307128433	6.79	3	501	2.60815	zinc-binding lipoprotein AdcA [Streptococcus pneumoniae 670-6B]
	Sequence	# Proteins	# Protein Groups	Activation Type	Modifications	Probability	XCorr	Δ Score	Rank	Charge	MH+ [Da]	ΔM [ppm]	First Scan	Last Scan	RT [min]	MSOrder	Ions Matched	Annotation
	TDVLNPLESLTEEDTK	12	1	CID		76.6217	2.60815	0	1	2	1803.89	1.22126	3958	3958	67.6567	MS2	15/30
	InITDNTMEFVqGGqSKK	12	1	CID	N2(Deamidated) Q12(Deamidated) Q15(Deamidated)	9.54825	0.531457	0	1	2	2012.94	-6.38924	1521	1521	38.6835	MS2	6/34
	INITDnTMEFVqGGqSKK	12	1	CID	N6(Deamidated) Q12(Deamidated) Q15(Deamidated)	2.84142	0.504699	0.0503482	2	2	2012.94	-6.38924	1521	1521	38.6835	MS2	6/34
gi307126817	8.66	2	277	2.60191	Ser/Thr protein phosphatase family protein [Streptococcus pneumoniae 670-6B]
	Sequence	# Proteins	# Protein Groups	Activation Type	Modifications	Probability	XCorr	Δ Score	Rank	Charge	MH+ [Da]	ΔM [ppm]	First Scan	Last Scan	RT [min]	MSOrder	Ions Matched	Annotation
	MDPATIVWLR	3	1	CID		5.44376	0.655371	0	1	2	1201.63	-9.93089	2885	2885	54.7205	MS2	5/18
	EIQSmRmTQFLmER	1	1	CID	M5(Oxidation) M7(Oxidation) M12(Oxidation)	16.5801	0.432014	0.451759	4	2	1847.86	10.8042	1764	1764	41.4487	MS2	5/26
gi307127871	14.12	3	262	2.59495	cell-division initiation protein [Streptococcus pneumoniae 670-6B]
	Sequence	# Proteins	# Protein Groups	Activation Type	Modifications	Probability	XCorr	Δ Score	Rank	Charge	MH+ [Da]	ΔM [ppm]	First Scan	Last Scan	RT [min]	MSOrder	Ions Matched	Annotation
	EVVSEVLGEPIPAPIEEEPIDMTR	5	1	CID		22.9775	2.59495	0	1	3	2649.33	-1.17107	4218	4218	71.4766	MS2	18/92
	EVVSEVLGEPIPAPIEEEPIDMTR	5	1	CID		10.0074	1.20118	0	1	2	2649.33	-5.9794	4229	4229	71.6148	MS2	8/46
	qFSqAEmEELQAR	3	1	CID	Q1(Deamidated) Q4(Deamidated) M7(Oxidation)	11.2069	0.563839	0	1	2	1584.7	15.4125	1050	1050	33.2866	MS2	4/24
gi307126728	18.39	1	174	2.57758	co-chaperone GrpE [Streptococcus pneumoniae 670-6B]
	Sequence	# Proteins	# Protein Groups	Activation Type	Modifications	Probability	XCorr	Δ Score	Rank	Charge	MH+ [Da]	ΔM [ppm]	First Scan	Last Scan	RT [min]	MSOrder	Ions Matched	Annotation
	NEEVEEVQEEEVVETAEETTPEKSELDLANER	4	1	CID		79.6906	2.57758	0	1	3	3703.68	-1.04135	3564	3564	62.8313	MS2	28/124
gi221232934	5.22	1	441	2.52184	sensor histidine kinase [Streptococcus pneumoniae ATCC 700669]
	Sequence	# Proteins	# Protein Groups	Activation Type	Modifications	Probability	XCorr	Δ Score	Rank	Charge	MH+ [Da]	ΔM [ppm]	First Scan	Last Scan	RT [min]	MSOrder	Ions Matched	Annotation
	KQMEVAVIKMETETVmVIqnSCK	1	1	CID	M16(Oxidation) Q19(Deamidated) N20(Deamidated)	5.76039	0.403556	0	1	2	2657.29	1.67563	1939	1939	43.4212	MS2	6/44
gi116516829	4.57	2	372	2.52046	chaperone protein DnaJ [Streptococcus pneumoniae D39]
	Sequence	# Proteins	# Protein Groups	Activation Type	Modifications	Probability	XCorr	Δ Score	Rank	Charge	MH+ [Da]	ΔM [ppm]	First Scan	Last Scan	RT [min]	MSOrder	Ions Matched	Annotation
	EVQEAYETLSDDQKR	6	1	CID		88.4078	2.52046	0	1	2	1810.85	1.41806	1516	1516	38.6273	MS2	13/28
	YKEVqEAYETLSDDqK	6	1	CID	Q5(Deamidated) Q15(Deamidated)	3.71879	0.412581	0	1	2	1947.88	10.5178	3193	3193	58.3822	MS2	5/30
gi307127742	14.79	2	311	2.47798	manganese-dependent inorganic pyrophosphatase [Streptococcus pneumoniae 670-6B]
	Sequence	# Proteins	# Protein Groups	Activation Type	Modifications	Probability	XCorr	Δ Score	Rank	Charge	MH+ [Da]	ΔM [ppm]	First Scan	Last Scan	RT [min]	MSOrder	Ions Matched	Annotation
	AEGAEQVILTDHNEFQQSVSDIAEVEVYGVVDHHR	1	1	CID		45.7064	2.47798	0	1	4	3920.86	-5.05313	4777	4777	80.3655	MS2	27/204
	SAEELIDIDAK	1	1	CID		3.14744	0.559809	0.208027	2	2	1203.61	-3.41011	2478	2478	49.6837	MS2	4/20
gi307067490	5.06	1	257	2.46212	hypothetical protein SPAP_0865 [Streptococcus pneumoniae AP200]
	Sequence	# Proteins	# Protein Groups	Activation Type	Modifications	Probability	XCorr	Δ Score	Rank	Charge	MH+ [Da]	ΔM [ppm]	First Scan	Last Scan	RT [min]	MSOrder	Ions Matched	Annotation
	RqGLGKPNRIYVK	1	1	CID	Q2(Deamidated)	4.45581	0.74892	0	1	2	1529.89	-2.29576	3911	3911	67.0732	MS2	4/24
gi307128502	6.62	1	393	2.41762	trypsin domain-containing protein [Streptococcus pneumoniae 670-6B]
	Sequence	# Proteins	# Protein Groups	Activation Type	Modifications	Probability	XCorr	Δ Score	Rank	Charge	MH+ [Da]	ΔM [ppm]	First Scan	Last Scan	RT [min]	MSOrder	Ions Matched	Annotation
	VDDKEIASSTDLQSALYNHSIGDTIK	8	1	CID		26.9288	2.41762	0	1	3	2820.39	-0.992167	3300	3300	59.7346	MS2	25/100
gi225856027	3.9	3	1256	2.37257	pullulanase, extracellular [Streptococcus pneumoniae P1031]
	Sequence	# Proteins	# Protein Groups	Activation Type	Modifications	Probability	XCorr	Δ Score	Rank	Charge	MH+ [Da]	ΔM [ppm]	First Scan	Last Scan	RT [min]	MSOrder	Ions Matched	Annotation
	TEEKPATEPTTSTSPVTTETK	7	1	CID		19.6745	2.37257	0	1	2	2235.09	2.60419	873	873	31.0398	MS2	12/40
	NTTTLAQPLTDTAAGSGK	6	1	CID		17.8599	1.1289	0	1	2	1746.89	-1.60979	1726	1726	41.0069	MS2	8/34
	FDWTKATDGK	7	1	CID		5.48523	0.669648	0	1	2	1168.55	-11.1997	1763	1763	41.4433	MS2	8/18
gi221231466	5.78	10	2233	2.33234	surface anchored beta-galactosidase [Streptococcus pneumoniae ATCC 700669]
	Sequence	# Proteins	# Protein Groups	Activation Type	Modifications	Probability	XCorr	Δ Score	Rank	Charge	MH+ [Da]	ΔM [ppm]	First Scan	Last Scan	RT [min]	MSOrder	Ions Matched	Annotation
	TEQSEPSSTEAIASEK	12	3	CID		30.2985	2.33234	0	1	2	1693.78	0.307627	920	920	31.6307	MS2	13/30
	NNPAIFMWSIGnEIGEAnGDAHSLATVKR	11	3	CID	N12(Deamidated) N18(Deamidated)	4.71376	1.03829	0	1	3	3114.51	16.1203	3818	3818	65.9549	MS2	13/112
	AYSNASSVELFLnGKSLGLKTFNK	12	3	CID	N13(Deamidated)	8.36065	1.0126	0.0340559	2	5	2589.37	12.7233	591	591	27.5251	MS2	38/184
	VEQEGKVGKER	3	2	CID		15.8363	0.919973	0	1	2	1258.67	-9.48636	2782	2782	53.4024	MS2	7/20
	LDSYqTFEVLGK	11	3	CID	Q5(Deamidated)	5.43459	0.740807	0	1	2	1400.7	8.12495	1217	1217	35.1695	MS2	4/22
	KTFKLDEK	11	3	CID		6.70981	0.703695	0	1	2	1008.57	0.26917	2745	2745	53.0015	MS2	3/14
	qVAAAKQGqTR	12	3	CID	Q1(Deamidated) Q9(Deamidated)	7.31168	0.453453	0.608004	3	2	1159.61	-0.262459	4093	4093	69.5887	MS2	6/20
	IRMVRADnK	3	1	CID	N8(Deamidated)	2.01456	0.45334	0	1	2	1103.6	-0.376889	3183	3183	58.2816	MS2	5/16
	qVAAAKqGQTR	12	3	CID	Q1(Deamidated) Q7(Deamidated)	7.31168	0.430904	0.627497	4	2	1159.61	-0.262459	4093	4093	69.5887	MS2	5/20
	DLAYKTVEK	12	3	CID		3.825	0.42783	0.509945	3	2	1066.58	0.231299	2941	2941	55.36	MS2	4/16
gi194397629	5.64	9	2233	2.33234	beta-galactosidase [Streptococcus pneumoniae G54]
	Sequence	# Proteins	# Protein Groups	Activation Type	Modifications	Probability	XCorr	Δ Score	Rank	Charge	MH+ [Da]	ΔM [ppm]	First Scan	Last Scan	RT [min]	MSOrder	Ions Matched	Annotation
	TEQSEPSSTEAIASEK	12	3	CID		30.2985	2.33234	0	1	2	1693.78	0.307627	920	920	31.6307	MS2	13/30
	NNPAIFMWSIGnEIGEAnGDAHSLATVKR	11	3	CID	N12(Deamidated) N18(Deamidated)	4.71376	1.03829	0	1	3	3114.51	16.1203	3818	3818	65.9549	MS2	13/112
	AYSNASSVELFLnGKSLGLKTFNK	12	3	CID	N13(Deamidated)	8.36065	1.0126	0.0340559	2	5	2589.37	12.7233	591	591	27.5251	MS2	38/184
	LDSYqTFEVLGK	11	3	CID	Q5(Deamidated)	5.43459	0.740807	0	1	2	1400.7	8.12495	1217	1217	35.1695	MS2	4/22
	KTFKLDEK	11	3	CID		6.70981	0.703695	0	1	2	1008.57	0.26917	2745	2745	53.0015	MS2	3/14
	EPKMPKTVGFVYSDGSR	1	1	CID		6.00903	0.520246	0.00963353	2	2	1897.96	16.2856	1306	1306	36.3033	MS2	6/32
	qVAAAKQGqTR	12	3	CID	Q1(Deamidated) Q9(Deamidated)	7.31168	0.453453	0.608004	3	2	1159.61	-0.262459	4093	4093	69.5887	MS2	6/20
	qVAAAKqGQTR	12	3	CID	Q1(Deamidated) Q7(Deamidated)	7.31168	0.430904	0.627497	4	2	1159.61	-0.262459	4093	4093	69.5887	MS2	5/20
	DLAYKTVEK	12	3	CID		3.825	0.42783	0.509945	3	2	1066.58	0.231299	2941	2941	55.36	MS2	4/16
gi15900551	6.09	10	2233	2.33234	beta-galactosidase [Streptococcus pneumoniae TIGR4]
	Sequence	# Proteins	# Protein Groups	Activation Type	Modifications	Probability	XCorr	Δ Score	Rank	Charge	MH+ [Da]	ΔM [ppm]	First Scan	Last Scan	RT [min]	MSOrder	Ions Matched	Annotation
	TEQSEPSSTEAIASEK	12	3	CID		30.2985	2.33234	0	1	2	1693.78	0.307627	920	920	31.6307	MS2	13/30
	DLTVEWEEVPAENLTK	7	1	CID		17.2238	1.57649	0	1	2	1872.92	-1.32905	3704	3704	64.4282	MS2	10/30
	NNPAIFMWSIGnEIGEAnGDAHSLATVKR	11	3	CID	N12(Deamidated) N18(Deamidated)	4.71376	1.03829	0	1	3	3114.51	16.1203	3818	3818	65.9549	MS2	13/112
	AYSNASSVELFLnGKSLGLKTFNK	12	3	CID	N13(Deamidated)	8.36065	1.0126	0.0340559	2	5	2589.37	12.7233	591	591	27.5251	MS2	38/184
	VEQEGKVGKER	3	2	CID		15.8363	0.919973	0	1	2	1258.67	-9.48636	2782	2782	53.4024	MS2	7/20
	LDSYqTFEVLGK	11	3	CID	Q5(Deamidated)	5.43459	0.740807	0	1	2	1400.7	8.12495	1217	1217	35.1695	MS2	4/22
	KTFKLDEK	11	3	CID		6.70981	0.703695	0	1	2	1008.57	0.26917	2745	2745	53.0015	MS2	3/14
	qVAAAKQGqTR	12	3	CID	Q1(Deamidated) Q9(Deamidated)	7.31168	0.453453	0.608004	3	2	1159.61	-0.262459	4093	4093	69.5887	MS2	6/20
	qVAAAKqGQTR	12	3	CID	Q1(Deamidated) Q7(Deamidated)	7.31168	0.430904	0.627497	4	2	1159.61	-0.262459	4093	4093	69.5887	MS2	5/20
	DLAYKTVEK	12	3	CID		3.825	0.42783	0.509945	3	2	1066.58	0.231299	2941	2941	55.36	MS2	4/16
gi307126489	2.89	3	693	2.30539	translation elongation factor G [Streptococcus pneumoniae 670-6B]
	Sequence	# Proteins	# Protein Groups	Activation Type	Modifications	Probability	XCorr	Δ Score	Rank	Charge	MH+ [Da]	ΔM [ppm]	First Scan	Last Scan	RT [min]	MSOrder	Ions Matched	Annotation
	IGETHEGASQMDWmEQEQER	6	1	CID	M14(Oxidation)	20.2969	2.30539	0	1	3	2406.99	-0.597753	1644	1644	40.0585	MS2	18/76
	IGETHEGASQmDWMEQEQER	6	1	CID	M11(Oxidation)	4.70308	1.94845	0.154829	2	3	2406.99	-0.597753	1644	1644	40.0585	MS2	15/76
	IGETHEGASQmDWmEQEQER	6	1	CID	M11(Oxidation) M14(Oxidation)	39.9375	1.94044	0	1	3	2422.99	2.41205	1202	1202	35.004	MS2	16/76
gi307127431	10.03	3	359	2.30158	peptide chain release factor 1 [Streptococcus pneumoniae 670-6B]
	Sequence	# Proteins	# Protein Groups	Activation Type	Modifications	Probability	XCorr	Δ Score	Rank	Charge	MH+ [Da]	ΔM [ppm]	First Scan	Last Scan	RT [min]	MSOrder	Ions Matched	Annotation
	YEELGELLSDPDVVSDTK	4	1	CID		49.1442	2.30158	0	1	2	2008.96	0.929658	3871	3871	66.6224	MS2	14/34
	YEELGELLSDPDVVSDTKR	4	1	CID		21.0802	1.94821	0	1	3	2165.06	0.62629	3682	3682	64.1755	MS2	18/72
	VADHFAQIAQDEQDAER	4	1	CID		10.9661	0.405968	0	1	2	1942.88	-6.06913	588	588	27.4804	MS2	4/32
gi307126633	11.42	3	324	2.28791	putative enoyl-(acyl-carrier-protein) reductase II [Streptococcus pneumoniae 670-6B]
	Sequence	# Proteins	# Protein Groups	Activation Type	Modifications	Probability	XCorr	Δ Score	Rank	Charge	MH+ [Da]	ΔM [ppm]	First Scan	Last Scan	RT [min]	MSOrder	Ions Matched	Annotation
	DAFKQEDPDLEIFEQMGAGALAK	5	1	CID		8.8689	2.28791	0	1	3	2523.21	0.832735	4476	4476	75.3848	MS2	21/88
	QEDPDLEIFEQMGAGALAK	5	1	CID		3.81433	0.606811	0	1	2	2061.98	2.59817	4413	4413	74.363	MS2	7/36
	AGGLGIIGGGnAPK	5	1	CID	N11(Deamidated)	5.49891	0.409832	0	1	2	1182.64	-6.88056	3953	3953	67.5989	MS2	4/26
gi307126432	6.14	1	277	2.22666	50S ribosomal protein L2 [Streptococcus pneumoniae 670-6B]
	Sequence	# Proteins	# Protein Groups	Activation Type	Modifications	Probability	XCorr	Δ Score	Rank	Charge	MH+ [Da]	ΔM [ppm]	First Scan	Last Scan	RT [min]	MSOrder	Ions Matched	Annotation
	NmTSLDFAEITTSTPEK	1	1	CID	M2(Oxidation)	119.642	2.22666	0	1	2	1900.88	-4.72796	2963	2963	55.6374	MS2	12/32
gi307128199	5.95	1	336	2.20846	catabolite control protein A [Streptococcus pneumoniae 670-6B]
	Sequence	# Proteins	# Protein Groups	Activation Type	Modifications	Probability	XCorr	Δ Score	Rank	Charge	MH+ [Da]	ΔM [ppm]	First Scan	Last Scan	RT [min]	MSOrder	Ions Matched	Annotation
	GVSVPEDFEIITSDDSQISR	6	1	CID		52.7231	2.20846	0	1	2	2194.05	-1.24901	3856	3856	66.4403	MS2	10/38
gi307126636	9.98	2	411	2.18827	3-oxoacyl-[acyl-carrier-protein] synthase 2 [Streptococcus pneumoniae 670-6B]
	Sequence	# Proteins	# Protein Groups	Activation Type	Modifications	Probability	XCorr	Δ Score	Rank	Charge	MH+ [Da]	ΔM [ppm]	First Scan	Last Scan	RT [min]	MSOrder	Ions Matched	Annotation
	LALEEAEISPEQVAYVNAHGTSTPANEK	3	1	CID		34.9946	2.18827	0	1	3	2968.46	1.73408	3050	3050	56.721	MS2	23/108
	ALPNmASGNVAmR	3	1	CID	M5(Oxidation) M12(Oxidation)	7.38797	0.785035	0	1	2	1363.65	1.73724	1947	1947	43.5357	MS2	5/24
gi307126455	17.97	2	128	2.12477	50S ribosomal protein L17 [Streptococcus pneumoniae 670-6B]
	Sequence	# Proteins	# Protein Groups	Activation Type	Modifications	Probability	XCorr	Δ Score	Rank	Charge	MH+ [Da]	ΔM [ppm]	First Scan	Last Scan	RT [min]	MSOrder	Ions Matched	Annotation
	NEIASENYDEATDKYTSTTALQK	2	1	CID		25.9446	2.12477	0	1	2	2592.19	-0.457764	2028	2028	44.3976	MS2	14/44
	NEIASENYDEATDKYTSTTALQK	2	1	CID		2.85852	0.57995	0	1	3	2592.19	-0.59328	2018	2018	44.302	MS2	14/88
gi194396737	3.95	3	709	2.1205	surface protein A [Streptococcus pneumoniae G54]
	Sequence	# Proteins	# Protein Groups	Activation Type	Modifications	Probability	XCorr	Δ Score	Rank	Charge	MH+ [Da]	ΔM [ppm]	First Scan	Last Scan	RT [min]	MSOrder	Ions Matched	Annotation
	TDDQQAEEDYAR	8	5	CID		94.2574	2.1205	0	1	2	1440.59	-1.91448	568	568	27.2247	MS2	14/22
	NSNGEqAEQYLAAAEK	1	1	CID	Q6(Deamidated)	9.12316	0.707532	0	1	2	1723.78	4.2803	2151	2151	45.8625	MS2	7/30
	NSNGEQAEqYLAAAEK	1	1	CID	Q9(Deamidated)	9.12316	0.653446	0.0764433	4	2	1723.78	4.2803	2151	2151	45.8625	MS2	5/30
gi169833837	4.4	4	705	2.1205	hypothetical protein SPH_0232 [Streptococcus pneumoniae Hungary19A-6]
	Sequence	# Proteins	# Protein Groups	Activation Type	Modifications	Probability	XCorr	Δ Score	Rank	Charge	MH+ [Da]	ΔM [ppm]	First Scan	Last Scan	RT [min]	MSOrder	Ions Matched	Annotation
	TDDQQAEEDYAR	8	5	CID		94.2574	2.1205	0	1	2	1440.59	-1.91448	568	568	27.2247	MS2	14/22
	IDVLQnK	1	1	CID	N6(Deamidated)	8.07517	0.862332	0	1	2	830.461	-0.557025	2227	2227	46.7895	MS2	6/12
	IDVLqNK	1	1	CID	Q5(Deamidated)	2.20523	0.834901	0.031811	2	2	830.461	-0.557025	2227	2227	46.7895	MS2	6/12
	NKILEqDAEnEK	1	1	CID	Q6(Deamidated) N10(Deamidated)	4.36857	0.496001	0.220434	5	2	1432.68	-2.48133	1255	1255	35.6881	MS2	4/22
gi225858695	11.98	4	501	2.07988	pyruvate kinase [Streptococcus pneumoniae 70585]
	Sequence	# Proteins	# Protein Groups	Activation Type	Modifications	Probability	XCorr	Δ Score	Rank	Charge	MH+ [Da]	ΔM [ppm]	First Scan	Last Scan	RT [min]	MSOrder	Ions Matched	Annotation
	SEVSDVFNAVIDGTDATmLSGESANGK	7	1	CID	M18(Oxidation)	3.05829	2.07988	0	1	3	2730.25	4.12815	4520	4520	76.0937	MS2	15/104
	LDVEASAKNIAK	6	1	CID		6.57754	1.08425	0	1	3	1258.69	-10.1747	1419	1419	37.5054	MS2	16/44
	GDmGIEVPFEmVPVYQKmIIK	6	1	CID	M3(Oxidation) M11(Oxidation) M18(Oxidation)	19.8685	0.809159	0.700278	4	2	2472.23	9.29075	4652	4652	78.2243	MS2	6/40
	SEVSDVFNAVIDGTDATmLSGESANGK	7	1	CID	M18(Oxidation)	15.0645	0.780736	0	1	2	2730.24	2.73778	4533	4533	76.3267	MS2	12/52
gi307128231	4.86	2	658	2.07597	transketolase [Streptococcus pneumoniae 670-6B]
	Sequence	# Proteins	# Protein Groups	Activation Type	Modifications	Probability	XCorr	Δ Score	Rank	Charge	MH+ [Da]	ΔM [ppm]	First Scan	Last Scan	RT [min]	MSOrder	Ions Matched	Annotation
	DPVEVTPADFPALENGFSQATR	9	1	CID		36.4763	2.07597	0	1	2	2361.14	-0.0615138	4174	4174	70.7875	MS2	16/42
	EEILPnAVRR	9	1	CID	N6(Deamidated)	3.2695	0.829982	0	1	2	1197.65	-11.657	1599	1599	39.5776	MS2	4/18
gi307128472	11.54	2	182	2.07533	ribosome-associated factor Y [Streptococcus pneumoniae 670-6B]
	Sequence	# Proteins	# Protein Groups	Activation Type	Modifications	Probability	XCorr	Δ Score	Rank	Charge	MH+ [Da]	ΔM [ppm]	First Scan	Last Scan	RT [min]	MSOrder	Ions Matched	Annotation
	AEDVSQDmYGSIDLVTDK	4	1	CID	M8(Oxidation)	41.2891	2.07533	0	1	2	2001.89	-10.1686	2556	2556	50.5782	MS2	10/34
	AEDVSQDMYGSIDLVTDKIER	4	1	CID		14.9281	0.660688	0	1	3	2384.13	3.15879	3927	3927	67.2592	MS2	14/80
gi225858133	10.64	1	329	2.04937	mannose-specific phosphotransferase system component iiab [Streptococcus pneumoniae 70585]
	Sequence	# Proteins	# Protein Groups	Activation Type	Modifications	Probability	XCorr	Δ Score	Rank	Charge	MH+ [Da]	ΔM [ppm]	First Scan	Last Scan	RT [min]	MSOrder	Ions Matched	Annotation
	ALPEELNPVEEVASAAAAPVAQTAIPEGTVIGDGK	3	1	CID		11.7967	2.04937	0	1	3	3414.77	2.0151	4677	4677	78.689	MS2	20/136
gi169833024	15.41	10	305	2.04106	zinc-binding lipoprotein AdcA [Streptococcus pneumoniae Hungary19A-6]
	Sequence	# Proteins	# Protein Groups	Activation Type	Modifications	Probability	XCorr	Δ Score	Rank	Charge	MH+ [Da]	ΔM [ppm]	First Scan	Last Scan	RT [min]	MSOrder	Ions Matched	Annotation
	TLNPLEADPQnDKTYLENLEEnMSILAEELK	1	1	CID	N11(Deamidated) N22(Deamidated)	13.9478	2.04106	0.0875147	2	3	3576.73	12.541	4588	4588	77.1379	MS2	18/120
	TLNPLEADPQNDKTYLEnLEEnMSILAEELK	1	1	CID	N18(Deamidated) N22(Deamidated)	13.9478	2.00386	0.104144	3	3	3576.73	12.541	4588	4588	77.1379	MS2	19/120
	TLNPLEADPqNDKTYLENLEEnMSILAEELK	1	1	CID	Q10(Deamidated) N22(Deamidated)	13.9478	1.99766	0.106916	4	3	3576.73	12.541	4588	4588	77.1379	MS2	18/120
	TLnPLEADPQNDKTYLENLEEnMSILAEELK	1	1	CID	N3(Deamidated) N22(Deamidated)	2.88737	1.93419	0.13529	5	3	3576.73	12.541	4588	4588	77.1379	MS2	17/120
	TLNPLEADPQnDKTYLEnLEENMSILAEELK	1	1	CID	N11(Deamidated) N18(Deamidated)	21.0332	1.72748	0.227701	6	3	3576.73	12.541	4588	4588	77.1379	MS2	15/120
	TLNPLEADPqNDKTYLEnLEENMSILAEELK	1	1	CID	Q10(Deamidated) N18(Deamidated)	21.0332	1.68702	0.24579	7	3	3576.73	12.541	4588	4588	77.1379	MS2	15/120
	TLNPLEADPqnDKTYLENLEENMSILAEELK	1	1	CID	Q10(Deamidated) N11(Deamidated)	37.0864	1.64484	0.26465	8	3	3576.73	12.541	4588	4588	77.1379	MS2	14/120
	TLnPLEADPQNDKTYLEnLEENMSILAEELK	1	1	CID	N3(Deamidated) N18(Deamidated)	2.88737	1.57648	0.29521	9	3	3576.73	12.541	4588	4588	77.1379	MS2	14/120
	TLnPLEADPqNDKTYLENLEENMSILAEELK	1	1	CID	N3(Deamidated) Q10(Deamidated)	13.9478	1.56861	0.29873	10	3	3576.73	12.541	4588	4588	77.1379	MS2	13/120
	VPGLEDVEAGDGVDEK	3	1	CID		14.4826	0.797745	0	1	2	1628.76	-0.273193	2220	2220	46.7102	MS2	9/30
gi225860713	20.41	1	98	2.00262	6-phospho-beta-glucosidase AscB [Streptococcus pneumoniae Taiwan19F-14]
	Sequence	# Proteins	# Protein Groups	Activation Type	Modifications	Probability	XCorr	Δ Score	Rank	Charge	MH+ [Da]	ΔM [ppm]	First Scan	Last Scan	RT [min]	MSOrder	Ions Matched	Annotation
	YGFIYVDRDNVGnGVLKRSK	1	1	CID	N13(Deamidated)	4.03213	0.63549	0	1	4	2301.21	8.47673	4576	4576	76.9849	MS2	17/114
gi307127191	6.4	2	328	2.00248	L-lactate dehydrogenase [Streptococcus pneumoniae 670-6B]
	Sequence	# Proteins	# Protein Groups	Activation Type	Modifications	Probability	XCorr	Δ Score	Rank	Charge	MH+ [Da]	ΔM [ppm]	First Scan	Last Scan	RT [min]	MSOrder	Ions Matched	Annotation
	ELQAIIDEAWKNPEFQEASKN	3	1	CID		3.37157	2.00248	0	1	3	2460.2	-1.22422	3970	3970	67.7858	MS2	17/80
	ELQAIIDEAWKNPEFQEASKN	3	1	CID		21.101	0.988503	0	1	2	2460.2	0.376142	4000	4000	68.15	MS2	11/40
gi307128324	18.95	4	306	1.97504	LysM domain-containing protein [Streptococcus pneumoniae 670-6B]
	Sequence	# Proteins	# Protein Groups	Activation Type	Modifications	Probability	XCorr	Δ Score	Rank	Charge	MH+ [Da]	ΔM [ppm]	First Scan	Last Scan	RT [min]	MSOrder	Ions Matched	Annotation
	QETQASPQAASAVEVTTTSSEAK	4	1	CID		48.7794	1.97504	0	1	2	2321.11	1.70685	1430	1430	37.6525	MS2	13/44
	QETQASPQAASAVEVTTTSSEAK	4	1	CID		18.2373	1.93396	0	1	3	2321.11	0.594766	1449	1449	37.8552	MS2	22/88
	EVASSNGATAAVSTYQPEETK	4	1	CID		6.53013	0.758398	0	1	2	2140.01	3.7288	1532	1532	38.7865	MS2	7/40
	SENQVFNHKqLPLK	1	1	CID	Q10(Deamidated)	3.77156	0.625206	0	1	2	1682.9	10.1805	3281	3281	59.4855	MS2	5/26
gi307127971	10.58	1	104	1.96562	thioredoxin [Streptococcus pneumoniae 670-6B]
	Sequence	# Proteins	# Protein Groups	Activation Type	Modifications	Probability	XCorr	Δ Score	Rank	Charge	MH+ [Da]	ΔM [ppm]	First Scan	Last Scan	RT [min]	MSOrder	Ions Matched	Annotation
	LSEELSEDVLK	2	1	CID		28.6339	1.96562	0	1	2	1261.65	-0.226162	2535	2535	50.3289	MS2	11/20
gi307126430	5.31	1	207	1.95724	50S ribosomal protein L4/L1 family [Streptococcus pneumoniae 670-6B]
	Sequence	# Proteins	# Protein Groups	Activation Type	Modifications	Probability	XCorr	Δ Score	Rank	Charge	MH+ [Da]	ΔM [ppm]	First Scan	Last Scan	RT [min]	MSOrder	Ions Matched	Annotation
	GGGVVFGPTPR	2	1	CID		17.6779	1.95724	0	1	2	1043.56	0.0807909	1631	1631	39.9286	MS2	11/20
gi116516732	10.78	3	167	1.89552	LysM domain-containing protein [Streptococcus pneumoniae D39]
	Sequence	# Proteins	# Protein Groups	Activation Type	Modifications	Probability	XCorr	Δ Score	Rank	Charge	MH+ [Da]	ΔM [ppm]	First Scan	Last Scan	RT [min]	MSOrder	Ions Matched	Annotation
	EGDTLSEIAETHNTTVEK	4	1	CID		5.08197	1.89552	0	1	2	1973.93	0.688291	2193	2193	46.364	MS2	7/34
	EGDTLSEIAETHNTTVEK	4	1	CID		20.6063	1.6475	0	1	3	1973.94	9.0977	1946	1946	43.5301	MS2	19/68
	EGDTLSEIAETHNTTVEK	4	1	CID		3.59043	0.662835	0.137544	2	3	1973.93	-2.80416	5643	5643	98.1914	MS2	11/68
gi307127692	5.19	1	308	1.87431	cell division ABC transporter permeae FtsX [Streptococcus pneumoniae 670-6B]
	Sequence	# Proteins	# Protein Groups	Activation Type	Modifications	Probability	XCorr	Δ Score	Rank	Charge	MH+ [Da]	ΔM [ppm]	First Scan	Last Scan	RT [min]	MSOrder	Ions Matched	Annotation
	IEGVSEVQDGGANTER	8	1	CID		50.2219	1.87431	0	1	2	1660.78	-0.956514	1174	1174	34.6997	MS2	11/30
gi307128478	4.63	1	259	1.80121	30S ribosomal protein S2 [Streptococcus pneumoniae 670-6B]
	Sequence	# Proteins	# Protein Groups	Activation Type	Modifications	Probability	XCorr	Δ Score	Rank	Charge	MH+ [Da]	ΔM [ppm]	First Scan	Last Scan	RT [min]	MSOrder	Ions Matched	Annotation
	MEEDGTFEVLPK	6	1	CID		50.2252	1.80121	0	1	2	1394.65	0.401416	2599	2599	51.1567	MS2	13/22
gi307128170	8.18	2	330	1.77758	aspartate--ammonia ligase [Streptococcus pneumoniae 670-6B]
	Sequence	# Proteins	# Protein Groups	Activation Type	Modifications	Probability	XCorr	Δ Score	Rank	Charge	MH+ [Da]	ΔM [ppm]	First Scan	Last Scan	RT [min]	MSOrder	Ions Matched	Annotation
	VGDGmQDNLSGVENPVSVK	3	1	CID	M5(Oxidation)	61.9788	1.77758	0	1	2	1960.93	-0.130186	2014	2014	44.2528	MS2	11/36
	ETVEKIYK	3	1	CID		13.2581	1.02171	0	1	2	1009.56	-0.942744	2992	2992	56.0166	MS2	6/14
gi307127749	16.67	1	96	1.77124	30S ribosomal protein S6 [Streptococcus pneumoniae 670-6B]
	Sequence	# Proteins	# Protein Groups	Activation Type	Modifications	Probability	XCorr	Δ Score	Rank	Charge	MH+ [Da]	ΔM [ppm]	First Scan	Last Scan	RT [min]	MSOrder	Ions Matched	Annotation
	FDSILTDNGATVVESK	2	1	CID		39.4488	1.77124	0	1	2	1695.84	0.268369	2766	2766	53.2075	MS2	14/30
gi182683022	6.13	3	522	1.75689	bifunctional phosphoribosylaminoimidazolecarboxamide formyltransferase/IMP cyclohydrolase [Streptococcus pneumoniae CGSP14]
	Sequence	# Proteins	# Protein Groups	Activation Type	Modifications	Probability	XCorr	Δ Score	Rank	Charge	MH+ [Da]	ΔM [ppm]	First Scan	Last Scan	RT [min]	MSOrder	Ions Matched	Annotation
	YGENPQQDADFYQK	11	1	CID		52.5655	1.75689	0	1	2	1702.73	-2.0539	1636	1636	39.9708	MS2	14/26
	ESPADWqVVTK	11	1	CID	Q7(Deamidated)	2.96636	0.657642	0	1	2	1260.61	-0.562279	3036	3036	56.5371	MS2	5/20
	KEnImTK	2	1	CID	N3(Deamidated) M5(Oxidation)	9.90485	0.410023	0	1	2	880.453	8.37512	693	693	28.7411	MS2	2/12
gi307126956	2.65	1	678	1.74858	glycyl-tRNA synthetase subunit beta [Streptococcus pneumoniae 670-6B]
	Sequence	# Proteins	# Protein Groups	Activation Type	Modifications	Probability	XCorr	Δ Score	Rank	Charge	MH+ [Da]	ΔM [ppm]	First Scan	Last Scan	RT [min]	MSOrder	Ions Matched	Annotation
	AEGVATVDSALFENDQEK	10	1	CID		35.8938	1.74858	0	1	2	1922.9	-2.82417	2881	2881	54.6837	MS2	9/34
gi307128147	4.38	1	388	1.73627	protein RecA [Streptococcus pneumoniae 670-6B]
	Sequence	# Proteins	# Protein Groups	Activation Type	Modifications	Probability	XCorr	Δ Score	Rank	Charge	MH+ [Da]	ΔM [ppm]	First Scan	Last Scan	RT [min]	MSOrder	Ions Matched	Annotation
	FGLIDGEEVSEQDTENK	2	1	CID		28.4243	1.73627	0	1	2	1909.87	3.05899	2527	2527	50.2553	MS2	11/32
gi221231867	6.3	8	2159	1.71078	IgA-protease [Streptococcus pneumoniae ATCC 700669]
	Sequence	# Proteins	# Protein Groups	Activation Type	Modifications	Probability	XCorr	Δ Score	Rank	Charge	MH+ [Da]	ΔM [ppm]	First Scan	Last Scan	RT [min]	MSOrder	Ions Matched	Annotation
	IDFQEEIQENPDLAEGTVR	9	4	CID		11.974	1.76705	0	1	3	2203.05	-0.259687	3166	3166	58.0756	MS2	18/72
	IDFQEEIQENPDLAEGTVR	9	4	CID		45.0404	1.71078	0	1	2	2203.05	-0.12417	3164	3164	58.0635	MS2	14/36
	IDFQEEIQENPDLAEGTVR	9	4	CID		3.00954	1.48293	0	1	3	2203.05	0.838946	3423	3423	61.0833	MS2	17/72
	IDFQEEIQENPDLAEGTVR	9	4	CID		3.86454	1.36076	0	1	3	2203.05	-0.992109	3707	3707	64.4606	MS2	14/72
	TGVNTLNPQDEVLSGQLNKPELLYR	12	6	CID		10.4475	0.990833	0	1	3	2798.47	0.189747	3613	3613	63.3723	MS2	11/96
	EYTGVqAGAIVEPEK	3	1	CID	Q6(Deamidated)	6.26414	0.920597	0	1	2	1591.78	-0.107592	2972	2972	55.7494	MS2	7/28
	IDFQEEIQENPDLAEGTVR	9	4	CID		2.88723	0.730299	0	1	2	2203.06	4.27036	4134	4134	70.2004	MS2	9/36
	AFVPDKTnnEWFKEqTK	3	1	CID	N8(Deamidated) N9(Deamidated) Q15(Deamidated)	5.74079	0.655746	0	1	2	2084.96	-18.7694	1142	1142	34.3095	MS2	4/32
gi307128177	5.82	1	275	1.68915	pur operon repressor [Streptococcus pneumoniae 670-6B]
	Sequence	# Proteins	# Protein Groups	Activation Type	Modifications	Probability	XCorr	Δ Score	Rank	Charge	MH+ [Da]	ΔM [ppm]	First Scan	Last Scan	RT [min]	MSOrder	Ions Matched	Annotation
	NQAIDVEVGNIFDEDK	1	1	CID		74.4905	1.68915	0	1	2	1805.85	-0.873584	3724	3724	64.6462	MS2	9/30
gi307067514	5.1	7	2098	1.64835	DNA methylase [Streptococcus pneumoniae AP200]
	Sequence	# Proteins	# Protein Groups	Activation Type	Modifications	Probability	XCorr	Δ Score	Rank	Charge	MH+ [Da]	ΔM [ppm]	First Scan	Last Scan	RT [min]	MSOrder	Ions Matched	Annotation
	FYNLPELMSmFKEVADIK	1	1	CID	M10(Oxidation)	3.60453	1.64835	0.229375	2	2	2191.07	-9.9055	3184	3184	58.287	MS2	8/34
	DIEDFTFnLLK	1	1	CID	N8(Deamidated)	9.24459	0.833275	0	1	3	1355.66	-13.4072	1193	1193	34.8954	MS2	12/40
	FGNTITCDEKEDEnLKDLMDLASK	1	1	CID	N14(Deamidated)	4.00856	0.685224	0.670546	4	3	2730.25	-3.26285	4520	4520	76.0937	MS2	14/92
	HGFInSLSnTRALK	1	1	CID	N5(Deamidated) N9(Deamidated)	6.05038	0.609248	0	1	2	1559.82	-2.09394	3731	3731	64.7278	MS2	4/26
	KRDSVIER	1	1	CID		2.0972	0.55273	0	1	2	1002.57	1.29983	2978	2978	55.8127	MS2	5/14
	EKIEPKFK	1	1	CID		2.2527	0.529574	0	1	2	1018.6	8.88708	3333	3333	60.1197	MS2	4/14
	DYWIVEFnEnHELVPDYSGqIVTK	1	1	CID	N8(Deamidated) N10(Deamidated) Q20(Deamidated)	5.72906	0.431817	0	1	2	2898.34	0.0316581	1407	1407	37.3647	MS2	7/46
gi298502143	9.7	9	701	1.645	ATP-dependent Clp protease, ATP-binding subunit [Streptococcus pneumoniae TCH8431/19A]
	Sequence	# Proteins	# Protein Groups	Activation Type	Modifications	Probability	XCorr	Δ Score	Rank	Charge	MH+ [Da]	ΔM [ppm]	First Scan	Last Scan	RT [min]	MSOrder	Ions Matched	Annotation
	ATGQLPGNAETDVQMPQQASGmK	8	1	CID	M22(Oxidation)	42.8438	1.645	0	1	2	2375.09	-3.65112	1907	1907	43.1076	MS2	12/44
	ATGQLPGNAETDVQmPQQASGmK	8	1	CID	M15(Oxidation) M22(Oxidation)	18.2262	1.49903	0	1	2	2391.1	7.53739	1343	1343	36.6809	MS2	13/44
	ATGQLPGNAETDVQMPQQASGMK	8	1	CID		39.5582	1.34025	0	1	2	2359.1	-2.87675	2181	2181	46.217	MS2	12/44
	ATGQLPGNAETDVQMPQQASGmK	8	1	CID	M22(Oxidation)	7.16867	1.28982	0	1	3	2375.1	5.85691	1893	1893	42.9447	MS2	17/88
	ATGQLPGNAETDVQmPQQASGMK	8	1	CID	M15(Oxidation)	23.7449	1.15868	0.295635	2	2	2375.09	-3.65112	1907	1907	43.1076	MS2	9/44
	VNAPSAEnTFKILqGIR	8	1	CID	N8(Deamidated) Q14(Deamidated)	3.46766	0.826637	0	1	2	1859.98	-9.99941	3149	3149	57.8999	MS2	6/32
	VnAPSAENTFKILqGIR	8	1	CID	N2(Deamidated) Q14(Deamidated)	3.46766	0.744742	0.0990707	2	2	1859.98	-9.99941	3149	3149	57.8999	MS2	6/32
	AVEAEDFEAALnYKTR	9	1	CID	N12(Deamidated)	3.12531	0.677603	0.102753	2	2	1827.87	-6.70701	1770	1770	41.5107	MS2	4/30
	LKPFFRPELLNR	1	1	CID		10.9493	0.643814	0	1	2	1529.89	-6.32976	3529	3529	62.3713	MS2	4/22
gi307126178	7.01	1	371	0	GTP-binding protein YchF [Streptococcus pneumoniae 670-6B]
	Sequence	# Proteins	# Protein Groups	Activation Type	Modifications	Probability	XCorr	Δ Score	Rank	Charge	MH+ [Da]	ΔM [ppm]	First Scan	Last Scan	RT [min]	MSOrder	Ions Matched	Annotation
	AGAEAANYPFATIDPNVGMVEVPDER	5	1	CID		14.6204	1.69501	0	1	3	2733.28	-1.9475	4007	4007	68.2381	MS2	20/100
gi307126226	4.75	2	463	0	gp35 [Streptococcus pneumoniae 670-6B]
	Sequence	# Proteins	# Protein Groups	Activation Type	Modifications	Probability	XCorr	Δ Score	Rank	Charge	MH+ [Da]	ΔM [ppm]	First Scan	Last Scan	RT [min]	MSOrder	Ions Matched	Annotation
	MYYNIAqR	2	1	CID	Q7(Deamidated)	6.97697	0.785432	0	1	2	1059.49	0.272291	1384	1384	37.1058	MS2	5/14
	KnDnLVEYLELqSK	2	1	CID	N2(Deamidated) N4(Deamidated) Q12(Deamidated)	4.01634	0.573202	0.676384	2	2	1695.84	11.5204	2766	2766	53.2075	MS2	4/26
gi307126240	3.05	2	821	0	PblA [Streptococcus pneumoniae 670-6B]
	Sequence	# Proteins	# Protein Groups	Activation Type	Modifications	Probability	XCorr	Δ Score	Rank	Charge	MH+ [Da]	ΔM [ppm]	First Scan	Last Scan	RT [min]	MSOrder	Ions Matched	Annotation
	NAWESmKQGVRDLVSnVTSIFDGIR	2	1	CID	M6(Oxidation) N16(Deamidated)	3.46953	0.738403	0.146312	3	2	2839.41	8.18296	2416	2416	48.9148	MS2	7/48
	DLVSnVTSIFDGIR	2	1	CID	N5(Deamidated)	2.51403	0.506254	0	1	2	1536.78	-15.2932	4303	4303	72.6901	MS2	4/26
gi307126259	3.65	3	877	0	DNA polymerase I [Streptococcus pneumoniae 670-6B]
	Sequence	# Proteins	# Protein Groups	Activation Type	Modifications	Probability	XCorr	Δ Score	Rank	Charge	MH+ [Da]	ΔM [ppm]	First Scan	Last Scan	RT [min]	MSOrder	Ions Matched	Annotation
	FPGIKNYmDEVVREAR	5	1	CID	M8(Oxidation)	11.7778	0.628058	0	1	3	1939.96	-6.87566	2165	2165	46.0226	MS2	8/60
	FPGIKNYmDEVVREAR	5	1	CID	M8(Oxidation)	2.45147	0.610708	0	1	2	1939.95	-15.2851	5423	5423	93.4266	MS2	3/30
	ETLLEMqAEnELVIEK	6	1	CID	Q7(Deamidated) N10(Deamidated)	5.69326	0.475958	0.701305	2	2	1890.93	8.16598	3998	3998	68.1227	MS2	3/30
gi307126369	2.6	1	538	0	ABC transporter ATP-binding protein [Streptococcus pneumoniae 670-6B]
	Sequence	# Proteins	# Protein Groups	Activation Type	Modifications	Probability	XCorr	Δ Score	Rank	Charge	MH+ [Da]	ΔM [ppm]	First Scan	Last Scan	RT [min]	MSOrder	Ions Matched	Annotation
	DYSGELRFCGDDIK	3	1	CID		4.28058	0.899104	0	1	2	1617.73	9.33919	2733	2733	52.8759	MS2	8/26
gi307126413	17.42	3	132	0	regulatory protein spx [Streptococcus pneumoniae 670-6B]
	Sequence	# Proteins	# Protein Groups	Activation Type	Modifications	Probability	XCorr	Δ Score	Rank	Charge	MH+ [Da]	ΔM [ppm]	First Scan	Last Scan	RT [min]	MSOrder	Ions Matched	Annotation
	EDDIRAFLPR	1	1	CID		3.03513	0.575388	0	1	2	1231.63	-11.3919	2401	2401	48.77	MS2	6/18
	NVEnAEARLRAAL	1	1	CID	N4(Deamidated)	5.12285	0.469898	0	1	3	1427.75	-12.2689	1750	1750	41.2672	MS2	10/48
	nVENAEARLRAAL	1	1	CID	N1(Deamidated)	5.12285	0.408355	0.130972	2	3	1427.75	-12.2689	1750	1750	41.2672	MS2	10/48
gi307126478	9.52	1	252	0	di-trans,poly-cis-decaprenylcistransferase [Streptococcus pneumoniae 670-6B]
	Sequence	# Proteins	# Protein Groups	Activation Type	Modifications	Probability	XCorr	Δ Score	Rank	Charge	MH+ [Da]	ΔM [ppm]	First Scan	Last Scan	RT [min]	MSOrder	Ions Matched	Annotation
	VFGHKAGMEALqTVTKAAnKLGVK	5	1	CID	Q12(Deamidated) N19(Deamidated)	7.36148	1.11343	0.0331806	2	5	2500.36	-1.24278	5203	5203	89.1433	MS2	27/184
gi307126481	5.51	3	617	0	prolyl-tRNA synthetase [Streptococcus pneumoniae 670-6B]
	Sequence	# Proteins	# Protein Groups	Activation Type	Modifications	Probability	XCorr	Δ Score	Rank	Charge	MH+ [Da]	ΔM [ppm]	First Scan	Last Scan	RT [min]	MSOrder	Ions Matched	Annotation
	SVASFDEIPAEVQEEIK	5	1	CID		5.09887	1.59346	0	1	2	1890.93	0.307978	3998	3998	68.1227	MS2	8/32
	DEKRPR	5	1	CID		6.86428	0.482036	0	1	2	800.436	-1.41062	1961	1961	43.6939	MS2	5/10
	LLSAVmEqHAR	5	1	CID	M6(Oxidation) Q8(Deamidated)	4.24584	0.437099	0	1	2	1271.64	1.06928	3079	3079	57.0849	MS2	4/20
gi307126559	14.24	3	316	0	transposase [Streptococcus pneumoniae 670-6B]
	Sequence	# Proteins	# Protein Groups	Activation Type	Modifications	Probability	XCorr	Δ Score	Rank	Charge	MH+ [Da]	ΔM [ppm]	First Scan	Last Scan	RT [min]	MSOrder	Ions Matched	Annotation
	YENYqETFqGPnSFSKTDPDATFMRMK	1	1	CID	Q5(Deamidated) Q9(Deamidated) N12(Deamidated)	5.38133	1.09268	0	1	3	3235.4	14.6293	1133	1133	34.1995	MS2	13/104
	YEnYQETFqGPnSFSKTDPDATFMRMK	1	1	CID	N3(Deamidated) Q9(Deamidated) N12(Deamidated)	5.38133	1.03722	0.0507525	2	3	3235.4	14.6293	1133	1133	34.1995	MS2	13/104
	RQVRIDMGLVLMAnnLLK	1	1	CID	N14(Deamidated) N15(Deamidated)	2.23995	0.859933	0	1	2	2086.16	4.80016	4682	4682	78.7927	MS2	4/34
gi307126719	8.02	2	324	0	type I restriction enzyme EcoKI specificity protein [Streptococcus pneumoniae 670-6B]
	Sequence	# Proteins	# Protein Groups	Activation Type	Modifications	Probability	XCorr	Δ Score	Rank	Charge	MH+ [Da]	ΔM [ppm]	First Scan	Last Scan	RT [min]	MSOrder	Ions Matched	Annotation
	MKYYLLSDNFINR	2	1	CID		5.60967	0.468225	0	1	2	1676.84	-4.45269	4438	4438	74.7555	MS2	4/24
	DIFSMnTGLSYKK	2	1	CID	N6(Deamidated)	12.3247	0.414672	0.466533	2	2	1504.72	-12.1972	2213	2213	46.615	MS2	5/24
gi307126733	16.91	6	136	0	protein hit [Streptococcus pneumoniae 670-6B]
	Sequence	# Proteins	# Protein Groups	Activation Type	Modifications	Probability	XCorr	Δ Score	Rank	Charge	MH+ [Da]	ΔM [ppm]	First Scan	Last Scan	RT [min]	MSOrder	Ions Matched	Annotation
	NLLEMNATSASqLFAqVPKVAqK	1	1	CID	Q12(Deamidated) Q16(Deamidated) Q22(Deamidated)	6.36648	1.56777	0.241803	3	2	2491.3	23.3981	3558	3558	62.7477	MS2	10/44
	nLLEMNATSASQLFAqVPKVAqK	1	1	CID	N1(Deamidated) Q16(Deamidated) Q22(Deamidated)	6.36648	1.4171	0.31467	4	2	2491.3	23.3981	3558	3558	62.7477	MS2	11/44
	NLLEMnATSASQLFAqVPKVAqK	1	1	CID	N6(Deamidated) Q16(Deamidated) Q22(Deamidated)	6.36648	1.39726	0.324263	5	2	2491.3	23.3981	3558	3558	62.7477	MS2	11/44
	NLLEMnATSASqLFAqVPK	1	1	CID	N6(Deamidated) Q12(Deamidated) Q16(Deamidated)	5.28265	1.20753	0	1	2	2065.02	0.994002	2763	2763	53.1747	MS2	10/36
	nLLEMNATSASqLFAqVPK	1	1	CID	N1(Deamidated) Q12(Deamidated) Q16(Deamidated)	5.28265	1.07754	0.107649	2	2	2065.02	0.994002	2763	2763	53.1747	MS2	9/36
	nLLEMnATSASQLFAqVPK	1	1	CID	N1(Deamidated) N6(Deamidated) Q16(Deamidated)	5.28265	0.923161	0.235496	3	2	2065.02	0.994002	2763	2763	53.1747	MS2	9/36
gi307126778	9.74	3	421	0	hypothetical protein SP670_0638 [Streptococcus pneumoniae 670-6B]
	Sequence	# Proteins	# Protein Groups	Activation Type	Modifications	Probability	XCorr	Δ Score	Rank	Charge	MH+ [Da]	ΔM [ppm]	First Scan	Last Scan	RT [min]	MSOrder	Ions Matched	Annotation
	MFPnqDVLPK	2	2	CID	N4(Deamidated) Q5(Deamidated)	2.10111	0.65036	0	1	2	1190.58	1.43102	4698	4698	79.0952	MS2	6/18
	EAGLTIRRIAR	2	2	CID		5.67065	0.483172	0	1	2	1255.76	-1.29706	3326	3326	60.0504	MS2	6/20
	SQFVMERSqFEEMFQLQSSR	1	1	CID	Q9(Deamidated)	14.6462	0.413887	0.172757	3	2	2495.12	-18.0495	541	541	26.8289	MS2	6/38
gi307126860	6.63	1	573	0	chorismate binding enzyme [Streptococcus pneumoniae 670-6B]
	Sequence	# Proteins	# Protein Groups	Activation Type	Modifications	Probability	XCorr	Δ Score	Rank	Charge	MH+ [Da]	ΔM [ppm]	First Scan	Last Scan	RT [min]	MSOrder	Ions Matched	Annotation
	NDmNRISEVGSEHVERLCQVEQYSTVWQmTSTIKSQLR	10	1	CID	M3(Oxidation) M29(Oxidation)	5.74517	1.55226	0	1	4	4514.13	-24.2602	2243	2243	46.9704	MS2	27/222
gi307127109	15.27	3	334	0	Tat-translocated enzyme [Streptococcus pneumoniae 670-6B]
	Sequence	# Proteins	# Protein Groups	Activation Type	Modifications	Probability	XCorr	Δ Score	Rank	Charge	MH+ [Da]	ΔM [ppm]	First Scan	Last Scan	RT [min]	MSOrder	Ions Matched	Annotation
	NEFDEVDLSLLPDDSHVCLAK	1	1	CID		4.65793	0.859331	0	1	3	2359.11	-7.13357	2184	2184	46.2609	MS2	13/80
	DGqnALFPPSDTGETVGLnPHR	2	1	CID	Q3(Deamidated) N4(Deamidated) N19(Deamidated)	3.69479	0.573049	0	1	2	2325.08	20.4744	1596	1596	39.5463	MS2	7/42
	LVEGELVK	2	1	CID		2.80602	0.564608	0	1	2	886.522	-2.50208	2295	2295	47.5737	MS2	7/14
gi307127134	1.89	2	1058	0	carbamoyl-phosphate synthase large subunit [Streptococcus pneumoniae 670-6B]
	Sequence	# Proteins	# Protein Groups	Activation Type	Modifications	Probability	XCorr	Δ Score	Rank	Charge	MH+ [Da]	ΔM [ppm]	First Scan	Last Scan	RT [min]	MSOrder	Ions Matched	Annotation
	ATGEVMAIGR	9	1	CID		5.03026	0.509098	0.152399	2	2	1004.53	6.57624	2485	2485	49.7635	MS2	6/18
	LFYVSEAIRR	9	1	CID		6.18947	0.49741	0	1	2	1253.69	-8.18917	2610	2610	51.3066	MS2	3/18
gi307127160	4.34	2	438	0	hypothetical protein SP670_1026 [Streptococcus pneumoniae 670-6B]
	Sequence	# Proteins	# Protein Groups	Activation Type	Modifications	Probability	XCorr	Δ Score	Rank	Charge	MH+ [Da]	ΔM [ppm]	First Scan	Last Scan	RT [min]	MSOrder	Ions Matched	Annotation
	MmEnSEEnFKAIIDEEVGR	4	1	CID	M2(Oxidation) N4(Deamidated) N8(Deamidated)	11.0002	0.40106	0	2	2	2259	18.3179	3428	3428	61.1285	MS2	6/36
	mMEnSEEnFKAIIDEEVGR	4	1	CID	M1(Oxidation) N4(Deamidated) N8(Deamidated)	11.0002	0.40106	0	1	2	2259	18.3179	3428	3428	61.1285	MS2	6/36
gi307127215	19.15	1	141	0	galactose-6-phosphate isomerase subunit LacA [Streptococcus pneumoniae 670-6B]
	Sequence	# Proteins	# Protein Groups	Activation Type	Modifications	Probability	XCorr	Δ Score	Rank	Charge	MH+ [Da]	ΔM [ppm]	First Scan	Last Scan	RT [min]	MSOrder	Ions Matched	Annotation
	SAYmTRGHNNSRmITMGAqLVGDELAK	4	1	CID	M4(Oxidation) M13(Oxidation) Q19(Deamidated)	4.10322	1.54529	0	1	4	2984.43	22.7543	4753	4753	80.056	MS2	21/156
gi307127306	2.85	3	527	0	ABC-type multidrug/protein/lipid transport system [Streptococcus pneumoniae 670-6B]
	Sequence	# Proteins	# Protein Groups	Activation Type	Modifications	Probability	XCorr	Δ Score	Rank	Charge	MH+ [Da]	ΔM [ppm]	First Scan	Last Scan	RT [min]	MSOrder	Ions Matched	Annotation
	STnNYSLqNNHYLSK	1	1	CID	N3(Deamidated) Q8(Deamidated)	2.32745	0.640174	0	1	2	1784.81	4.43258	635	635	28.0742	MS2	3/28
	STNnYSLqNNHYLSK	1	1	CID	N4(Deamidated) Q8(Deamidated)	2.32745	0.639599	0.000899506	2	2	1784.81	4.43258	635	635	28.0742	MS2	3/28
	STnnYSLQNNHYLSK	1	1	CID	N3(Deamidated) N4(Deamidated)	2.32745	0.517723	0.191278	6	2	1784.81	4.43258	635	635	28.0742	MS2	6/28
gi307127309	7.23	14	2074	0	SNF2 family protein [Streptococcus pneumoniae 670-6B]
	Sequence	# Proteins	# Protein Groups	Activation Type	Modifications	Probability	XCorr	Δ Score	Rank	Charge	MH+ [Da]	ΔM [ppm]	First Scan	Last Scan	RT [min]	MSOrder	Ions Matched	Annotation
	VAnNLSDRVSRDIEEFLLmVDSKELK	1	1	CID	N3(Deamidated) M19(Oxidation)	8.68659	1.27309	0.243698	4	4	3037.55	-5.89351	2135	2135	45.7046	MS2	18/150
	VANnLSDRVSRDIEEFLLmVDSKELK	1	1	CID	N4(Deamidated) M19(Oxidation)	8.68659	1.27207	0.244299	5	4	3037.55	-5.89351	2135	2135	45.7046	MS2	18/150
	YIKQIMTSKEPIRAAEDIDEqTMTASDFK	4	3	CID	Q21(Deamidated)	4.03731	1.02009	0	1	4	3360.64	9.01774	1040	1040	33.1992	MS2	21/168
	RKqFVSRIITGDYDAIVIGDSQFEK	4	3	CID	Q3(Deamidated)	4.4023	1.00131	0.346269	3	5	2886.51	11.0221	773	773	29.8538	MS2	30/192
	DYDRFVSQFGYLnASVnRnLFDSDDK	2	1	CID	N13(Deamidated) N17(Deamidated) N19(Deamidated)	4.38859	0.750624	0.754829	2	3	3088.36	-21.7974	3488	3488	61.8001	MS2	11/100
	ELKKEVLEIHFEEK	2	1	CID		22.5034	0.695745	0.336903	2	3	1770.97	10.566	5087	5087	86.9261	MS2	12/52
	NVDmEmKVRQIQEEHDFK	4	3	CID	M4(Oxidation) M6(Oxidation)	2.07478	0.543914	0	1	2	2308.09	15.2472	4406	4406	74.264	MS2	5/34
	IPVSKERQMNYIEDK	4	3	CID		8.07894	0.506551	0.192212	2	3	1849.96	9.07996	2045	2045	44.5614	MS2	10/56
	ELKKEVLEIHFEEK	2	1	CID		16.9774	0.500501	0	1	2	1770.97	9.96911	672	672	28.4638	MS2	5/26
	ELKKEVLEIHFEEK	2	1	CID		3.80577	0.495169	0.183768	2	3	1770.98	13.1295	5254	5254	89.9387	MS2	10/52
	ELKKEVLEIHFEEK	2	1	CID		3.33584	0.476752	0.468029	3	3	1770.97	8.91807	5397	5397	92.9576	MS2	10/52
	ELKKEVLEIHFEEK	2	1	CID		3.36431	0.475427	0.139233	2	3	1770.98	14.045	4948	4948	83.8619	MS2	10/52
	ELKKEVLEIHFEEK	2	1	CID		5.52377	0.47287	0.375109	2	3	1770.97	10.3829	4798	4798	80.7695	MS2	8/52
	ELKKEVLEIHFEEK	2	1	CID		7.01373	0.437503	0.148839	2	3	1770.98	14.4112	5540	5540	96.0448	MS2	9/52
gi307127315	4.93	3	771	0	hypothetical protein SP670_1183 [Streptococcus pneumoniae 670-6B]
	Sequence	# Proteins	# Protein Groups	Activation Type	Modifications	Probability	XCorr	Δ Score	Rank	Charge	MH+ [Da]	ΔM [ppm]	First Scan	Last Scan	RT [min]	MSOrder	Ions Matched	Annotation
	MMnQnLDSGEnnFSAVKLISFGR	4	1	CID	N3(Deamidated) N5(Deamidated) N11(Deamidated) N12(Deamidated)	2.33249	0.956072	0.500128	3	3	2576.18	10.9839	4548	4548	76.5409	MS2	16/88
	MMNqnLDSGEnnFSAVKLISFGR	4	1	CID	Q4(Deamidated) N5(Deamidated) N11(Deamidated) N12(Deamidated)	2.33249	0.951364	0.50259	4	3	2576.18	10.9839	4548	4548	76.5409	MS2	16/88
	TNIQTGSNFLIYNVK	5	2	CID		9.58549	0.78831	0.0795608	2	2	1711.9	-0.851006	3887	3887	66.8255	MS2	8/28
gi307127401	6.12	4	898	0	phosphoenolpyruvate carboxylase [Streptococcus pneumoniae 670-6B]
	Sequence	# Proteins	# Protein Groups	Activation Type	Modifications	Probability	XCorr	Δ Score	Rank	Charge	MH+ [Da]	ΔM [ppm]	First Scan	Last Scan	RT [min]	MSOrder	Ions Matched	Annotation
	YGNKDAAYYNLEmLVSAAInRMITqKK	9	1	CID	M13(Oxidation) N20(Deamidated) Q25(Deamidated)	4.3197	1.60813	0.314201	3	3	3123.57	20.0066	4482	4482	75.4565	MS2	18/104
	AIPWVFSWSQSR	10	2	CID		3.29038	0.665199	0	1	3	1463.75	5.95577	1446	1446	37.8249	MS2	5/44
	KIYQLYR	10	2	CID		2.72122	0.466196	0	1	2	983.561	-6.26958	3214	3214	58.6328	MS2	3/12
	ELAIFKTAR	10	2	CID		2.78583	0.455324	0	1	2	1048.62	4.54313	4158	4158	70.5125	MS2	4/16
gi307127427	9.33	2	418	0	serine hydroxymethyltransferase [Streptococcus pneumoniae 670-6B]
	Sequence	# Proteins	# Protein Groups	Activation Type	Modifications	Probability	XCorr	Δ Score	Rank	Charge	MH+ [Da]	ΔM [ppm]	First Scan	Last Scan	RT [min]	MSOrder	Ions Matched	Annotation
	VAQNLLDEVnITLnKnSIPYETLSPFK	6	1	CID	N10(Deamidated) N14(Deamidated) N16(Deamidated)	4.87544	1.57933	0.614858	9	3	3063.55	-26.788	4779	4779	80.3937	MS2	16/104
	NSENEAVLEEVR	6	1	CID		30.0644	1.47599	0	1	2	1388.67	1.27021	1823	1823	42.1229	MS2	11/22
gi307127428	18.18	2	143	0	GNAT family acetyltransferase protein [Streptococcus pneumoniae 670-6B]
	Sequence	# Proteins	# Protein Groups	Activation Type	Modifications	Probability	XCorr	Δ Score	Rank	Charge	MH+ [Da]	ΔM [ppm]	First Scan	Last Scan	RT [min]	MSOrder	Ions Matched	Annotation
	LNSAnHRLGAHAFYEKVGYTCDKMqK	4	1	CID	N5(Deamidated) Q25(Deamidated)	4.88842	1.32198	0.309771	6	4	2983.39	-26.5565	1856	1856	42.4997	MS2	29/150
	LnSANHRLGAHAFYEKVGYTCDKMqK	4	1	CID	N2(Deamidated) Q25(Deamidated)	4.88842	1.25307	0.345752	9	4	2983.39	-26.5565	1856	1856	42.4997	MS2	28/150
gi307127556	2.6	1	1116	0	type I restriction-modification system R subunit [Streptococcus pneumoniae 670-6B]
	Sequence	# Proteins	# Protein Groups	Activation Type	Modifications	Probability	XCorr	Δ Score	Rank	Charge	MH+ [Da]	ΔM [ppm]	First Scan	Last Scan	RT [min]	MSOrder	Ions Matched	Annotation
	EKYPQIAISVDMLDTGIDVPEVVNLVFFK	10	1	CID		2.78268	0.921876	0	1	3	3279.74	13.3996	4067	4067	69.2603	MS2	16/112
gi307127665	11.03	2	399	0	membrane-fusion protein [Streptococcus pneumoniae 670-6B]
	Sequence	# Proteins	# Protein Groups	Activation Type	Modifications	Probability	XCorr	Δ Score	Rank	Charge	MH+ [Da]	ΔM [ppm]	First Scan	Last Scan	RT [min]	MSOrder	Ions Matched	Annotation
	NEAASAPAPQLPAPVGGEDATVQSPTPVAGNSVASIDAQLGDAR	6	1	CID		37.0474	2.09144	0	1	4	4197.07	3.21538	3569	3569	62.9062	MS2	40/258
	NEAASAPAPQLPAPVGGEDATVQSPTPVAGNSVASIDAQLGDAR	6	1	CID		105.695	1.64782	0	1	3	4197.08	8.29475	3571	3571	62.9336	MS2	33/172
gi307127744	9.64	2	249	0	methyltransferase [Streptococcus pneumoniae 670-6B]
	Sequence	# Proteins	# Protein Groups	Activation Type	Modifications	Probability	XCorr	Δ Score	Rank	Charge	MH+ [Da]	ΔM [ppm]	First Scan	Last Scan	RT [min]	MSOrder	Ions Matched	Annotation
	TQAQILSVEIQER	4	1	CID		8.62634	0.769675	0.223403	3	3	1514.82	6.28125	1572	1572	39.2979	MS2	11/48
	SAQSILKSnGR	2	1	CID	N9(Deamidated)	7.19886	0.528974	0	1	2	1161.63	10.4607	4354	4354	73.5177	MS2	7/20
gi307127753	6.08	3	395	0	aspartate aminotransferase [Streptococcus pneumoniae 670-6B]
	Sequence	# Proteins	# Protein Groups	Activation Type	Modifications	Probability	XCorr	Δ Score	Rank	Charge	MH+ [Da]	ΔM [ppm]	First Scan	Last Scan	RT [min]	MSOrder	Ions Matched	Annotation
	VLEMEESVTLAAGARAKALKAEGR	6	1	CID		7.93394	1.10312	0	1	5	2500.36	3.97992	1972	1972	43.8357	MS2	34/184
	VLEMEESVTLAAGARAKALKAEGR	6	1	CID		3.77487	0.774082	0	1	5	2500.36	1.23334	929	929	31.7282	MS2	22/184
	VLEMEESVTLAAGARAKALKAEGR	6	1	CID		7.22324	0.405745	0.0908464	2	3	2500.35	-1.30324	658	658	28.3251	MS2	12/92
gi307127874	29.05	2	179	0	YlmF protein [Streptococcus pneumoniae 670-6B]
	Sequence	# Proteins	# Protein Groups	Activation Type	Modifications	Probability	XCorr	Δ Score	Rank	Charge	MH+ [Da]	ΔM [ppm]	First Scan	Last Scan	RT [min]	MSOrder	Ions Matched	Annotation
	ENNITRLHARQQELAnqSqRATDK	4	1	CID	N16(Deamidated) Q17(Deamidated) Q19(Deamidated)	4.47775	1.54541	0.552787	3	3	2824.4	5.5496	4507	4507	75.8849	MS2	13/92
	DEPVFTPVNSSQEPALPMNQPSQSAGTK	1	1	CID		8.57651	1.18576	0	1	3	2956.4	2.03108	2920	2920	55.1061	MS2	17/108
gi307127877	12.47	4	457	0	cell division protein FtsA [Streptococcus pneumoniae 670-6B]
	Sequence	# Proteins	# Protein Groups	Activation Type	Modifications	Probability	XCorr	Δ Score	Rank	Charge	MH+ [Da]	ΔM [ppm]	First Scan	Last Scan	RT [min]	MSOrder	Ions Matched	Annotation
	TAQFVQSTPVQPAPAPEVEPVAPTEPMADFQQASQNKPK	2	1	CID		23.9005	1.67162	0	1	3	4161.06	-0.2758	3266	3266	59.2793	MS2	26/152
	TAQFVQSTPVQPAPAPEVEPVAPTEPMADFQQASQNKPK	2	1	CID		7.14049	1.6643	0	1	4	4161.06	2.70148	3265	3265	59.2732	MS2	29/228
	TAQFVQSTPVQPAPAPEVEPVAPTEPmADFQQASQNKPK	2	1	CID	M27(Oxidation)	36.5716	0.945604	0	1	3	4177.06	5.29748	2794	2794	53.5413	MS2	22/152
	GENDLSHQPISFGGmLQK	1	1	CID	M15(Oxidation)	4.01386	0.43452	0	1	3	1973.93	-7.88705	5792	5792	104.211	MS2	10/68
gi307127912	4.66	1	343	0	phospho-2-dehydro-3-deoxyheptonate aldolase [Streptococcus pneumoniae 670-6B]
	Sequence	# Proteins	# Protein Groups	Activation Type	Modifications	Probability	XCorr	Δ Score	Rank	Charge	MH+ [Da]	ΔM [ppm]	First Scan	Last Scan	RT [min]	MSOrder	Ions Matched	Annotation
	qYMEQIRIVRqTLqnR	4	1	CID	Q1(Deamidated) Q11(Deamidated) Q14(Deamidated) N15(Deamidated)	3.01441	0.709171	0.10776	2	2	2080.03	-14.2856	1652	1652	40.1322	MS2	3/30
gi307128003	16.42	1	67	0	hypothetical protein SP670_1882 [Streptococcus pneumoniae 670-6B]
	Sequence	# Proteins	# Protein Groups	Activation Type	Modifications	Probability	XCorr	Δ Score	Rank	Charge	MH+ [Da]	ΔM [ppm]	First Scan	Last Scan	RT [min]	MSOrder	Ions Matched	Annotation
	DAVEGAVEGVK	1	1	CID		11.737	1.53165	0	1	2	1073.55	-0.722842	1199	1199	34.9734	MS2	12/20
gi307128029	9.75	6	708	0	cell wall surface anchor family protein [Streptococcus pneumoniae 670-6B]
	Sequence	# Proteins	# Protein Groups	Activation Type	Modifications	Probability	XCorr	Δ Score	Rank	Charge	MH+ [Da]	ΔM [ppm]	First Scan	Last Scan	RT [min]	MSOrder	Ions Matched	Annotation
	DYGAVGDGIHDDR	9	1	CID		54.0295	1.52464	0	1	3	1389.6	-0.346532	1048	1048	33.2745	MS2	14/48
	ESSNAITNDLDNSPTVNQNR	9	1	CID		43.6984	1.36075	0	1	2	2189.01	1.2688	1884	1884	42.8235	MS2	11/38
	DLLDLNK	9	1	CID		8.07517	0.745168	0.13587	4	2	830.461	-0.561025	2227	2227	46.7895	MS2	5/12
	IVTnnLSDK	9	1	CID	N4(Deamidated) N5(Deamidated)	9.04513	0.573279	0.648572	2	2	1005.51	-0.903533	1725	1725	41.0016	MS2	7/16
	NGEFnSSKDNRQmNDKIDnK	8	1	CID	N5(Deamidated) M13(Oxidation) N19(Deamidated)	3.33506	0.487025	0.278896	2	2	2372.04	-1.44336	1781	1781	41.6601	MS2	5/38
	nGEFNSSKDNRQmNDKIDnK	8	1	CID	N1(Deamidated) M13(Oxidation) N19(Deamidated)	3.33506	0.485796	0.280715	3	2	2372.04	-1.44336	1781	1781	41.6601	MS2	5/38
gi307128048	7.3	1	493	0	galactose-1-phosphate uridylyltransferase [Streptococcus pneumoniae 670-6B]
	Sequence	# Proteins	# Protein Groups	Activation Type	Modifications	Probability	XCorr	Δ Score	Rank	Charge	MH+ [Da]	ΔM [ppm]	First Scan	Last Scan	RT [min]	MSOrder	Ions Matched	Annotation
	FEmVGQEWGFQYSPYAYFnEHCIFLDGQHRPMAISR	10	1	CID	M3(Oxidation) N19(Deamidated)	7.69182	1.56632	0	1	6	4370.94	-15.1547	795	795	30.1098	MS2	37/350
gi307128175	6.44	1	264	0	pyruvate formate-lyase 1-activating enzyme [Streptococcus pneumoniae 670-6B]
	Sequence	# Proteins	# Protein Groups	Activation Type	Modifications	Probability	XCorr	Δ Score	Rank	Charge	MH+ [Da]	ΔM [ppm]	First Scan	Last Scan	RT [min]	MSOrder	Ions Matched	Annotation
	NAKKLmDTESYQDYMKR	2	1	CID	M6(Oxidation)	10.1699	0.431817	0	1	2	2136.99	-11.3922	2539	2539	50.3815	MS2	4/32
gi307128327	5.26	3	494	0	threonine synthase [Streptococcus pneumoniae 670-6B]
	Sequence	# Proteins	# Protein Groups	Activation Type	Modifications	Probability	XCorr	Δ Score	Rank	Charge	MH+ [Da]	ΔM [ppm]	First Scan	Last Scan	RT [min]	MSOrder	Ions Matched	Annotation
	HMFnDVALREK	8	1	CID	N4(Deamidated)	10.8695	0.866574	0	1	3	1360.67	4.86583	2496	2496	49.8941	MS2	10/40
	TTELMnALnTQGQYK	6	1	CID	N6(Deamidated) N9(Deamidated)	8.85365	0.543052	0	1	2	1713.81	6.02457	3165	3165	58.0696	MS2	4/28
	TTELMnALNTqGQYK	6	1	CID	N6(Deamidated) Q11(Deamidated)	8.85365	0.461051	0.151002	2	2	1713.81	6.02457	3165	3165	58.0696	MS2	4/28
gi307128452	8.1	2	469	0	M protein trans-acting positive regulator (MGA) [Streptococcus pneumoniae 670-6B]
	Sequence	# Proteins	# Protein Groups	Activation Type	Modifications	Probability	XCorr	Δ Score	Rank	Charge	MH+ [Da]	ΔM [ppm]	First Scan	Last Scan	RT [min]	MSOrder	Ions Matched	Annotation
	LDLVLWAHISqqRLRVNACqFQVIEEK	9	1	CID	Q11(Deamidated) Q12(Deamidated) Q20(Deamidated)	4.4114	0.646418	0.199029	2	6	3239.7	13.7309	4369	4369	73.7158	MS2	33/260
	FITIEAYDPSR	9	1	CID		6.72256	0.546112	0	1	3	1311.66	1.06995	2397	2397	48.7347	MS2	9/40
gi307128464	3.88	1	335	0	ABC transporter substrate-binding protein [Streptococcus pneumoniae 670-6B]
	Sequence	# Proteins	# Protein Groups	Activation Type	Modifications	Probability	XCorr	Δ Score	Rank	Charge	MH+ [Da]	ΔM [ppm]	First Scan	Last Scan	RT [min]	MSOrder	Ions Matched	Annotation
	APFAVYFqDYMAK	1	1	CID	Q8(Deamidated)	12.4833	0.753443	0	1	2	1551.73	13.0939	3729	3729	64.7025	MS2	5/24
gi307128490	2.19	2	365	0	DNA replication and repair protein RecF [Streptococcus pneumoniae 670-6B]
	Sequence	# Proteins	# Protein Groups	Activation Type	Modifications	Probability	XCorr	Δ Score	Rank	Charge	MH+ [Da]	ΔM [ppm]	First Scan	Last Scan	RT [min]	MSOrder	Ions Matched	Annotation
	VNHLKQAR	6	1	CID		10.2663	0.847922	0	1	2	965.566	2.49255	2315	2315	47.8234	MS2	8/14
	VNHLKQAR	6	1	CID		15.0294	0.583674	0	1	2	965.567	3.1029	2573	2573	50.8212	MS2	5/14
gi307128491	16.67	10	492	0	inosine-5'-monophosphate dehydrogenase [Streptococcus pneumoniae 670-6B]
	Sequence	# Proteins	# Protein Groups	Activation Type	Modifications	Probability	XCorr	Δ Score	Rank	Charge	MH+ [Da]	ΔM [ppm]	First Scan	Last Scan	RT [min]	MSOrder	Ions Matched	Annotation
	FISDYNQPISNHMTSENLVTAPVGTDLATAESILQEHR	2	1	CID		4.0807	1.89951	0	1	4	4199.04	7.97023	4689	4689	78.9508	MS2	31/222
	GSSDRYFqGSVNEANK	2	1	CID	Q8(Deamidated)	12.4549	1.26145	0.650073	2	2	1759.8	15.023	5627	5627	97.835	MS2	5/30
	GSSDRYFQGSVNEAnK	2	1	CID	N15(Deamidated)	12.4549	1.23184	0.658287	3	2	1759.8	15.023	5627	5627	97.835	MS2	5/30
	GSSDRYFQGSVnEANK	2	1	CID	N12(Deamidated)	12.4549	1.10993	0.692105	4	2	1759.8	15.023	5627	5627	97.835	MS2	5/30
	GSSDRYFQGSVnEANK	2	1	CID	N12(Deamidated)	3.87374	0.879435	0.407895	2	2	1759.8	15.9995	4099	4099	69.6757	MS2	6/30
	GSSDRYFqGSVNEANK	2	1	CID	Q8(Deamidated)	3.87374	0.746063	0.497691	3	2	1759.8	15.9995	4099	4099	69.6757	MS2	5/30
	RSEnGVIIDPFFLTPEHTIAEADELmGR	2	1	CID	N4(Deamidated) M26(Oxidation)	8.09322	0.718945	0.0884213	2	3	3174.55	10.8469	3483	3483	61.7413	MS2	11/108
	GSSDRYFqGSVNEANK	2	1	CID	Q8(Deamidated)	5.59496	0.61333	0.506612	2	2	1759.8	15.3892	5715	5715	100.879	MS2	7/30
	GSSDRYFQGSVnEANK	2	1	CID	N12(Deamidated)	5.59496	0.610834	0.50862	3	2	1759.8	15.3892	5715	5715	100.879	MS2	6/30
	GSSDRYFQGSVNEAnK	2	1	CID	N15(Deamidated)	10.9416	0.507056	0.65861	4	2	1759.8	15.9995	4099	4099	69.6757	MS2	5/30
gi225857876	4.04	11	2970	0	PblB [Streptococcus pneumoniae 70585]
	Sequence	# Proteins	# Protein Groups	Activation Type	Modifications	Probability	XCorr	Δ Score	Rank	Charge	MH+ [Da]	ΔM [ppm]	First Scan	Last Scan	RT [min]	MSOrder	Ions Matched	Annotation
	QGADNqISNLKTQVATNK	2	2	CID	Q6(Deamidated)	2.43727	1.12162	0.710392	2	2	1930.98	1.85151	3841	3841	66.3064	MS2	11/34
	QGADNQISNLKTqVATNK	2	2	CID	Q13(Deamidated)	2.43727	1.02269	0.735936	3	2	1930.98	1.85151	3841	3841	66.3064	MS2	9/34
	QGADnQISNLKTQVATNK	2	2	CID	N5(Deamidated)	2.43727	1.01038	0.739113	4	2	1930.98	1.85151	3841	3841	66.3064	MS2	10/34
	DKASKSELTqTAEELSSK	3	3	CID	Q10(Deamidated)	3.55428	1.0021	0	1	3	1952.97	3.4372	4307	4307	72.7489	MS2	13/68
	QGADNQISnLKTQVATNK	2	2	CID	N9(Deamidated)	2.43727	0.979753	0.747022	6	2	1930.98	1.85151	3841	3841	66.3064	MS2	10/34
	DKAnKSELTQTAEELASK	1	1	CID	N4(Deamidated)	7.1677	0.702304	0.162479	5	3	1963.96	-17.9849	983	983	32.4292	MS2	10/68
	AIQELNQK	3	3	CID		2.27396	0.663849	0	1	2	943.521	-0.144854	2432	2432	49.1059	MS2	4/14
	DIASQIASYR	3	3	CID		2.03725	0.566626	0	1	2	1123.56	-10.3609	2439	2439	49.1954	MS2	4/18
	qELSDTINQRFnSFDNGPLK	2	2	CID	Q1(Deamidated) N12(Deamidated)	4.50073	0.523428	0.086591	2	2	2325.08	-15.8996	1596	1596	39.5463	MS2	4/38
	qELSDTINqRFNSFDNGPLK	2	2	CID	Q1(Deamidated) Q9(Deamidated)	4.50073	0.516724	0.0982905	3	2	2325.08	-15.8996	1596	1596	39.5463	MS2	5/38
	SIGFGTFQSSLAnAIGGIVnDAVLNESR	1	1	CID	N13(Deamidated) N20(Deamidated)	2.83741	0.42018	0.514218	5	2	2839.41	1.66196	2416	2416	48.9148	MS2	6/54
gi225858148	5.07	1	296	0	hypothetical protein SP70585_0358 [Streptococcus pneumoniae 70585]
	Sequence	# Proteins	# Protein Groups	Activation Type	Modifications	Probability	XCorr	Δ Score	Rank	Charge	MH+ [Da]	ΔM [ppm]	First Scan	Last Scan	RT [min]	MSOrder	Ions Matched	Annotation
	DFHFYKEIEnmDKIK	1	1	CID	N10(Deamidated) M11(Oxidation)	6.32516	0.465421	0.754463	2	2	1973.93	-0.832709	2193	2193	46.364	MS2	4/28
gi225858346	6.2	5	516	0	type I restriction enzyme [Streptococcus pneumoniae 70585]
	Sequence	# Proteins	# Protein Groups	Activation Type	Modifications	Probability	XCorr	Δ Score	Rank	Charge	MH+ [Da]	ΔM [ppm]	First Scan	Last Scan	RT [min]	MSOrder	Ions Matched	Annotation
	nLQYLSPEqAPSRARK	7	1	CID	N1(Deamidated) Q9(Deamidated)	3.81729	0.667337	0.192708	3	2	1859.98	15.1706	3149	3149	57.8999	MS2	6/30
	LVPQNPnDEPASELLK	2	1	CID	N7(Deamidated)	2.57981	0.654618	0.144216	2	2	1764.9	-1.19115	2789	2789	53.4832	MS2	6/30
	NLqYLSPEqAPSRARK	7	1	CID	Q3(Deamidated) Q9(Deamidated)	3.81729	0.632289	0.235107	5	2	1859.98	15.1706	3149	3149	57.8999	MS2	6/30
	LVPQNPnDEPASELLK	2	1	CID	N7(Deamidated)	8.86486	0.445634	0.551995	3	2	1764.9	-0.214584	3048	3048	56.6951	MS2	5/30
	LVPQNPnDEPASELLK	2	1	CID	N7(Deamidated)	11.4254	0.403684	0.642239	2	2	1764.9	1.61647	2541	2541	50.4079	MS2	6/30
gi225858473	5.13	12	2144	0	serine protease [Streptococcus pneumoniae 70585]
	Sequence	# Proteins	# Protein Groups	Activation Type	Modifications	Probability	XCorr	Δ Score	Rank	Charge	MH+ [Da]	ΔM [ppm]	First Scan	Last Scan	RT [min]	MSOrder	Ions Matched	Annotation
	QIEGISSVERAqKVQPMMNHAR	4	2	CID	Q12(Deamidated)	4.27339	1.33429	0.241568	3	3	2510.28	16.1561	2548	2548	50.4766	MS2	12/84
	QIEGISSVERAQKVqPMMNHAR	4	2	CID	Q15(Deamidated)	4.27339	1.21924	0.306959	4	3	2510.28	16.1561	2548	2548	50.4766	MS2	9/84
	DTTGVEHHHQENEESIK	4	2	CID		2.7117	1.04559	0.634369	2	2	1989.89	2.38614	2707	2707	52.5676	MS2	7/32
	NLGnGKEGSLK	5	3	CID	N4(Deamidated)	2.81484	0.902511	0	1	2	1117.58	-3.61294	1110	1110	33.9556	MS2	7/20
	IFnGSAIETTPDnLDK	8	2	CID	N3(Deamidated) N13(Deamidated)	4.00934	0.863336	0.0965264	2	2	1736.83	10.1059	4056	4056	69.0251	MS2	4/30
	NEVVATFKnTDSK	10	3	CID	N9(Deamidated)	5.87907	0.773577	0	1	2	1453.7	-12.4619	3254	3254	59.1176	MS2	5/24
	LWNmInPnKKTEVK	5	3	CID	M4(Oxidation) N6(Deamidated) N8(Deamidated)	2.30055	0.752721	0	2	3	1732.89	-5.39538	1739	1739	41.1498	MS2	11/52
	LWnmINPnKKTEVK	5	3	CID	N3(Deamidated) M4(Oxidation) N8(Deamidated)	2.30055	0.738168	0.0193335	5	3	1732.89	-5.39538	1739	1739	41.1498	MS2	11/52
	LWnmInPNKKTEVK	5	3	CID	N3(Deamidated) M4(Oxidation) N6(Deamidated)	2.30055	0.645367	0.142621	6	3	1732.89	-5.39538	1739	1739	41.1498	MS2	9/52
	DnQDPATKIR	10	3	CID	N2(Deamidated)	18.0199	0.621822	0	1	2	1158.56	-11.3511	2769	2769	53.2393	MS2	5/18
	DNqDPATKIR	10	3	CID	Q3(Deamidated)	18.0199	0.525193	0.155396	2	2	1158.56	-11.3511	2769	2769	53.2393	MS2	5/18
	DASKYQK	1	1	CID		3.14132	0.463467	0.21479	2	2	839.428	2.61103	2917	2917	55.0589	MS2	5/12
gi225858759	7.44	6	551	0	fibronectin/fibrinogen binding protein [Streptococcus pneumoniae 70585]
	Sequence	# Proteins	# Protein Groups	Activation Type	Modifications	Probability	XCorr	Δ Score	Rank	Charge	MH+ [Da]	ΔM [ppm]	First Scan	Last Scan	RT [min]	MSOrder	Ions Matched	Annotation
	KQEKELLATDnAEEFRQK	9	1	CID	N11(Deamidated)	5.3173	0.863281	0	1	3	2178.1	-0.745804	4446	4446	74.8564	MS2	11/68
	RVEnELQKNRHK	11	1	CID	N4(Deamidated)	7.37563	0.717357	0	1	3	1551.85	14.5052	1607	1607	39.6658	MS2	10/44
	nLQSLFQGLGR	11	1	CID	N1(Deamidated)	5.77004	0.709614	0.022286	2	2	1233.65	-7.49665	4233	4233	71.6702	MS2	6/20
	NLQSLFqGLGR	11	1	CID	Q7(Deamidated)	14.578	0.641436	0.116223	3	2	1233.65	-7.49665	4233	4233	71.6702	MS2	6/20
	NLqSLFQGLGR	11	1	CID	Q3(Deamidated)	5.77004	0.629048	0.133291	4	2	1233.65	-7.49665	4233	4233	71.6702	MS2	5/20
	RVENELqKNRHK	11	1	CID	Q7(Deamidated)	7.37563	0.563174	0.214932	3	3	1551.85	14.5052	1607	1607	39.6658	MS2	9/44
gi225858833	2.68	1	933	0	CHAP domain protein [Streptococcus pneumoniae 70585]
	Sequence	# Proteins	# Protein Groups	Activation Type	Modifications	Probability	XCorr	Δ Score	Rank	Charge	MH+ [Da]	ΔM [ppm]	First Scan	Last Scan	RT [min]	MSOrder	Ions Matched	Annotation
	SEGATnqAIAAILGnWSVESSINPK	1	1	CID	N6(Deamidated) Q7(Deamidated) N15(Deamidated)	3.32366	1.07904	0.302556	4	4	2560.26	15.2953	2482	2482	49.7336	MS2	22/144
gi225858976	3.88	1	309	0	tagatose-6-phosphate kinase [Streptococcus pneumoniae 70585]
	Sequence	# Proteins	# Protein Groups	Activation Type	Modifications	Probability	XCorr	Δ Score	Rank	Charge	MH+ [Da]	ΔM [ppm]	First Scan	Last Scan	RT [min]	MSOrder	Ions Matched	Annotation
	AnVLGMLNAQEK	4	1	CID	N2(Deamidated)	2.19376	0.946784	0.498907	2	2	1288.66	6.86245	2689	2689	52.348	MS2	5/22
gi225859123	7.4	1	419	0	chlorohydrolase [Streptococcus pneumoniae 70585]
	Sequence	# Proteins	# Protein Groups	Activation Type	Modifications	Probability	XCorr	Δ Score	Rank	Charge	MH+ [Da]	ΔM [ppm]	First Scan	Last Scan	RT [min]	MSOrder	Ions Matched	Annotation
	CYFSPTLFSSETETTAETISRTRSIIDEILK	11	1	CID		7.12247	1.26855	0.18333	2	4	3538.75	-10.1954	2360	2360	48.3668	MS2	25/180
gi225859283	5.67	4	652	0	oligopeptide binding lipoprotein [Streptococcus pneumoniae 70585]
	Sequence	# Proteins	# Protein Groups	Activation Type	Modifications	Probability	XCorr	Δ Score	Rank	Charge	MH+ [Da]	ΔM [ppm]	First Scan	Last Scan	RT [min]	MSOrder	Ions Matched	Annotation
	AVGLDVYTQMLEEANKEQDPAKR	4	1	CID		7.51472	1.50806	0	1	3	2605.29	1.75748	3821	3821	66.0041	MS2	12/88
	NLVVPPNFVSIK	4	1	CID		11.9649	1.13734	0	1	2	1326.78	6.28806	3328	3328	60.0763	MS2	7/22
	AVGLDVYTQMLEEANKEQDPAK	4	1	CID		6.13328	0.800196	0.421497	9	3	2449.19	-2.95748	3947	3947	67.4851	MS2	11/84
	AKAVGLDVYTQmLEEANK	4	1	CID	M12(Oxidation)	4.07321	0.528591	0	1	2	1996	-6.10698	2473	2473	49.6304	MS2	6/34
gi225859514	1.71	1	526	0	accessory secretory protein Asp1 [Streptococcus pneumoniae 70585]
	Sequence	# Proteins	# Protein Groups	Activation Type	Modifications	Probability	XCorr	Δ Score	Rank	Charge	MH+ [Da]	ΔM [ppm]	First Scan	Last Scan	RT [min]	MSOrder	Ions Matched	Annotation
	WIEEVKnVK	5	1	CID	N7(Deamidated)	9.86878	0.684003	0	1	2	1145.61	-5.48568	1753	1753	41.2976	MS2	8/16
gi225859519	2.83	2	814	0	glycosyl transferase, family 8 [Streptococcus pneumoniae 70585]
	Sequence	# Proteins	# Protein Groups	Activation Type	Modifications	Probability	XCorr	Δ Score	Rank	Charge	MH+ [Da]	ΔM [ppm]	First Scan	Last Scan	RT [min]	MSOrder	Ions Matched	Annotation
	IARmLGSEIIDVK	2	1	CID	M4(Oxidation)	3.83364	1.35563	0	1	3	1460.8	-14.469	2119	2119	45.5335	MS2	12/48
	LIEQSIVTMK	2	1	CID		2.52274	0.682181	0	1	2	1161.65	-6.83448	3191	3191	58.3565	MS2	5/18
gi225859551	3.91	1	435	0	hypothetical protein SP70585_1842 [Streptococcus pneumoniae 70585]
	Sequence	# Proteins	# Protein Groups	Activation Type	Modifications	Probability	XCorr	Δ Score	Rank	Charge	MH+ [Da]	ΔM [ppm]	First Scan	Last Scan	RT [min]	MSOrder	Ions Matched	Annotation
	ESSqMMFGTTDVPKVKK	1	1	CID	Q4(Deamidated)	12.3229	0.673918	0.647461	2	2	1913.92	-12.6506	5501	5501	95.1132	MS2	5/32
gi225859570	7.13	4	491	0	arylsulfatase [Streptococcus pneumoniae 70585]
	Sequence	# Proteins	# Protein Groups	Activation Type	Modifications	Probability	XCorr	Δ Score	Rank	Charge	MH+ [Da]	ΔM [ppm]	First Scan	Last Scan	RT [min]	MSOrder	Ions Matched	Annotation
	VGYQDEVPWNFTnTLPK	4	1	CID	N13(Deamidated)	2.63303	0.86632	0	1	2	2008.97	5.59342	1559	1559	39.1391	MS2	6/32
	VGYQDEVPWnFTNTLPK	4	1	CID	N10(Deamidated)	8.74066	0.82769	0.0445904	4	2	2008.97	5.59342	1559	1559	39.1391	MS2	6/32
	VGYqDEVPWNFTNTLPK	4	1	CID	Q4(Deamidated)	2.63303	0.725182	0.162917	5	2	2008.97	5.59342	1559	1559	39.1391	MS2	5/32
	DMGYQTECIGKmHVFPSR	4	1	CID	M12(Oxidation)	24.8976	0.655138	0	1	2	2114.94	-3.78417	2302	2302	47.6522	MS2	5/34
gi225859603	2.58	1	581	0	ABC transporter, ATP-binding protein [Streptococcus pneumoniae 70585]
	Sequence	# Proteins	# Protein Groups	Activation Type	Modifications	Probability	XCorr	Δ Score	Rank	Charge	MH+ [Da]	ΔM [ppm]	First Scan	Last Scan	RT [min]	MSOrder	Ions Matched	Annotation
	MYILGTSYCLGQImR	10	1	CID	M14(Oxidation)	7.21166	0.528481	0	1	3	1764.84	-7.78908	1335	1335	36.5955	MS2	12/56
gi225859720	5.84	5	274	0	DNA-entry nuclease (Competence-specific nuclease) [Streptococcus pneumoniae 70585]
	Sequence	# Proteins	# Protein Groups	Activation Type	Modifications	Probability	XCorr	Δ Score	Rank	Charge	MH+ [Da]	ΔM [ppm]	First Scan	Last Scan	RT [min]	MSOrder	Ions Matched	Annotation
	QMPSAPnSPKTNLSQK	1	1	CID	N7(Deamidated)	9.34148	1.57884	0.397723	2	2	1728.86	5.59604	2276	2276	47.3295	MS2	5/30
	QMPSAPNSPKTnLSQK	1	1	CID	N12(Deamidated)	3.26602	1.26409	0.517789	3	2	1728.86	5.59604	2276	2276	47.3295	MS2	4/30
	qMPSAPNSPKTNLSQK	1	1	CID	Q1(Deamidated)	3.26602	1.23626	0.528407	4	2	1728.86	5.59604	2276	2276	47.3295	MS2	5/30
	QMPSAPNSPKTNLSqK	1	1	CID	Q15(Deamidated)	3.26602	1.02605	0.608597	5	2	1728.86	5.59604	2276	2276	47.3295	MS2	4/30
	qMPSAPNSPKTNLSQK	1	1	CID	Q1(Deamidated)	2.73877	0.85468	0.522304	2	3	1728.87	7.10847	2175	2175	46.1444	MS2	11/60
gi307066694	4.42	10	3035	0	PblB, putative [Streptococcus pneumoniae AP200]
	Sequence	# Proteins	# Protein Groups	Activation Type	Modifications	Probability	XCorr	Δ Score	Rank	Charge	MH+ [Da]	ΔM [ppm]	First Scan	Last Scan	RT [min]	MSOrder	Ions Matched	Annotation
	QGADNqISNLKTQVATNK	2	2	CID	Q6(Deamidated)	2.43727	1.12162	0.710392	2	2	1930.98	1.85151	3841	3841	66.3064	MS2	11/34
	QGADNQISNLKTqVATNK	2	2	CID	Q13(Deamidated)	2.43727	1.02269	0.735936	3	2	1930.98	1.85151	3841	3841	66.3064	MS2	9/34
	QGADnQISNLKTQVATNK	2	2	CID	N5(Deamidated)	2.43727	1.01038	0.739113	4	2	1930.98	1.85151	3841	3841	66.3064	MS2	10/34
	DKASKSELTqTAEELSSK	3	3	CID	Q10(Deamidated)	3.55428	1.0021	0	1	3	1952.97	3.4372	4307	4307	72.7489	MS2	13/68
	QGADNQISnLKTQVATNK	2	2	CID	N9(Deamidated)	2.43727	0.979753	0.747022	6	2	1930.98	1.85151	3841	3841	66.3064	MS2	10/34
	AIQELNQK	3	3	CID		2.27396	0.663849	0	1	2	943.521	-0.144854	2432	2432	49.1059	MS2	4/14
	DIASQIASYR	3	3	CID		2.03725	0.566626	0	1	2	1123.56	-10.3609	2439	2439	49.1954	MS2	4/18
	qELSDTINQRFnSFDNGPLK	2	2	CID	Q1(Deamidated) N12(Deamidated)	4.50073	0.523428	0.086591	2	2	2325.08	-15.8996	1596	1596	39.5463	MS2	4/38
	qELSDTINqRFNSFDNGPLK	2	2	CID	Q1(Deamidated) Q9(Deamidated)	4.50073	0.516724	0.0982905	3	2	2325.08	-15.8996	1596	1596	39.5463	MS2	5/38
	SITPVSVTSqSCGMALSRMVqnTK	1	1	CID	Q10(Deamidated) Q21(Deamidated) N22(Deamidated)	4.21984	0.498484	0	1	2	2528.18	-22.5211	3522	3522	62.2832	MS2	8/46
gi307066747	4.85	6	1856	0	hypothetical protein SPAP_0117 [Streptococcus pneumoniae AP200]
	Sequence	# Proteins	# Protein Groups	Activation Type	Modifications	Probability	XCorr	Δ Score	Rank	Charge	MH+ [Da]	ΔM [ppm]	First Scan	Last Scan	RT [min]	MSOrder	Ions Matched	Annotation
	GFLPYVSNQYGAEAFASGSKTFSSWHGR	1	1	CID		10.1837	1.20395	0	1	3	3051.42	-22.6957	805	805	30.2187	MS2	12/108
	EAFmLGLTYmnRWYDInYGKMNTK	1	1	CID	M4(Oxidation) M10(Oxidation) N11(Deamidated) N17(Deamidated)	3.43859	0.822248	0.0326287	2	4	2993.36	5.63135	1983	1983	43.9366	MS2	18/138
	DIDSVELYGKEnDRYR	1	1	CID	N12(Deamidated)	4.13545	0.760908	0.045871	2	3	1972.91	-14.2517	4197	4197	71.1308	MS2	13/60
	EAFmLGLTYmnRWYDINYGKMnTK	1	1	CID	M4(Oxidation) M10(Oxidation) N11(Deamidated) N22(Deamidated)	3.43859	0.63576	0.252031	3	4	2993.36	5.63135	1983	1983	43.9366	MS2	15/138
	LnKAEAERK	1	1	CID	N2(Deamidated)	2.35383	0.481834	0.279545	2	2	1059.59	6.6278	2805	2805	53.6903	MS2	5/16
	YSAqRDSQPNSTK	1	1	CID	Q4(Deamidated)	9.30969	0.453094	0	1	2	1482.69	3.5051	778	778	29.9142	MS2	4/24
gi307066819	4.19	1	191	0	hypothetical protein SPAP_0190 [Streptococcus pneumoniae AP200]
	Sequence	# Proteins	# Protein Groups	Activation Type	Modifications	Probability	XCorr	Δ Score	Rank	Charge	MH+ [Da]	ΔM [ppm]	First Scan	Last Scan	RT [min]	MSOrder	Ions Matched	Annotation
	EFCIPnNK	1	1	CID	N6(Deamidated)	3.62028	0.864956	0	1	2	965.433	-7.13355	1523	1523	38.6954	MS2	7/14
gi307067280	3.02	1	563	0	putative signal transduction protein [Streptococcus pneumoniae AP200]
	Sequence	# Proteins	# Protein Groups	Activation Type	Modifications	Probability	XCorr	Δ Score	Rank	Charge	MH+ [Da]	ΔM [ppm]	First Scan	Last Scan	RT [min]	MSOrder	Ions Matched	Annotation
	qFnAMLnqIDQLMVAIR	1	1	CID	Q1(Deamidated) N3(Deamidated) N7(Deamidated) Q8(Deamidated)	2.63303	0.843229	0.0266544	2	2	2008.97	-1.18458	1559	1559	39.1391	MS2	7/32
gi307067488	12.66	1	237	0	type I restriction-modification system methyltransferase subunit [Streptococcus pneumoniae AP200]
	Sequence	# Proteins	# Protein Groups	Activation Type	Modifications	Probability	XCorr	Δ Score	Rank	Charge	MH+ [Da]	ΔM [ppm]	First Scan	Last Scan	RT [min]	MSOrder	Ions Matched	Annotation
	IDQLWEILWTEGnAnPLTnIEqLTYLLFMK	5	1	CID	N13(Deamidated) N15(Deamidated) N19(Deamidated) Q22(Deamidated)	7.37024	0.883909	0	1	3	3610.78	-13.9243	2455	2455	49.3797	MS2	14/116
gi307067505	4.46	3	807	0	type IV secretory pathway, VirB4 component [Streptococcus pneumoniae AP200]
	Sequence	# Proteins	# Protein Groups	Activation Type	Modifications	Probability	XCorr	Δ Score	Rank	Charge	MH+ [Da]	ΔM [ppm]	First Scan	Last Scan	RT [min]	MSOrder	Ions Matched	Annotation
	KIGmLVIqDQVWnKVSLNR	1	1	CID	M4(Oxidation) Q8(Deamidated) N13(Deamidated)	2.93537	1.83492	0.666007	2	3	2259.2	-19.6837	4450	4450	74.9143	MS2	17/72
	KIGmLVIqDqVWNKVSLNR	1	1	CID	M4(Oxidation) Q8(Deamidated) Q10(Deamidated)	2.93537	1.54172	0.719377	6	3	2259.2	-19.6837	4450	4450	74.9143	MS2	18/72
	LVHDmLnPDKnFDFSYK	1	1	CID	M5(Oxidation) N7(Deamidated) N11(Deamidated)	11.1574	0.696439	0	1	2	2100.96	-1.28945	1038	1038	33.1738	MS2	4/32
gi307067513	13.71	2	321	0	site-specific DNA methylase [Streptococcus pneumoniae AP200]
	Sequence	# Proteins	# Protein Groups	Activation Type	Modifications	Probability	XCorr	Δ Score	Rank	Charge	MH+ [Da]	ΔM [ppm]	First Scan	Last Scan	RT [min]	MSOrder	Ions Matched	Annotation
	APnEKIDLImHGSPCqDFSRIGKK	1	1	CID	N3(Deamidated) M10(Oxidation) Q16(Deamidated)	17.9032	1.56711	0	1	3	2702.34	9.52613	3197	3197	58.4358	MS2	15/92
	EmKDKPKWIIWENVKGVLDR	1	1	CID	M2(Oxidation)	8.07662	0.669004	0.00423262	2	4	2500.36	18.8601	1350	1350	36.7476	MS2	16/114
gi307067515	2.15	1	511	0	retron-type reverse transcriptase [Streptococcus pneumoniae AP200]
	Sequence	# Proteins	# Protein Groups	Activation Type	Modifications	Probability	XCorr	Δ Score	Rank	Charge	MH+ [Da]	ΔM [ppm]	First Scan	Last Scan	RT [min]	MSOrder	Ions Matched	Annotation
	KTYFPKVnFAR	1	1	CID	N8(Deamidated)	2.75066	0.445601	0.720982	3	2	1371.75	5.24268	1698	1698	40.7362	MS2	4/20
gi307067679	2.43	1	329	0	lipoate-protein ligase A [Streptococcus pneumoniae AP200]
	Sequence	# Proteins	# Protein Groups	Activation Type	Modifications	Probability	XCorr	Δ Score	Rank	Charge	MH+ [Da]	ΔM [ppm]	First Scan	Last Scan	RT [min]	MSOrder	Ions Matched	Annotation
	SPEFNVRR	1	1	CID		14.1167	0.600634	0	1	2	1004.53	-1.26376	2485	2485	49.7635	MS2	4/14
gi307067997	4.21	5	832	0	serine/threonine protein kinase [Streptococcus pneumoniae AP200]
	Sequence	# Proteins	# Protein Groups	Activation Type	Modifications	Probability	XCorr	Δ Score	Rank	Charge	MH+ [Da]	ΔM [ppm]	First Scan	Last Scan	RT [min]	MSOrder	Ions Matched	Annotation
	GIVPPDFLnKWLDKK	5	1	CID	N9(Deamidated)	9.17189	0.896199	0	1	3	1770.97	-6.34793	5397	5397	92.9576	MS2	15/56
	WDEAPIYLR	5	1	CID		6.71627	0.580001	0	1	2	1162.59	3.02938	1116	1116	34.0326	MS2	6/16
	GIVPPDFLnKWLDKK	5	1	CID	N9(Deamidated)	17.6394	0.552329	0	1	3	1770.98	-1.22098	4948	4948	83.8619	MS2	11/56
	GIVPPDFLnKWLDKK	5	1	CID	N9(Deamidated)	6.5318	0.421057	0.180835	3	3	1770.98	-0.854769	5540	5540	96.0448	MS2	12/56
	FSnSGGIYnAR	5	1	CID	N3(Deamidated) N9(Deamidated)	2.65226	0.419761	0	1	2	1187.52	-10.3968	2419	2419	48.9435	MS2	5/20
gi307068414	27.16	1	81	0	hypothetical protein SPAP_1795 [Streptococcus pneumoniae AP200]
	Sequence	# Proteins	# Protein Groups	Activation Type	Modifications	Probability	XCorr	Δ Score	Rank	Charge	MH+ [Da]	ΔM [ppm]	First Scan	Last Scan	RT [min]	MSOrder	Ions Matched	Annotation
	DISNHHDSESFFANLGCSRQRR	1	1	CID		10.4777	1.91263	0	1	3	2576.18	-5.39211	4548	4548	76.5409	MS2	13/84
gi221231046	11.57	1	268	0	extracellular amino acid-binding protein [Streptococcus pneumoniae ATCC 700669]
	Sequence	# Proteins	# Protein Groups	Activation Type	Modifications	Probability	XCorr	Δ Score	Rank	Charge	MH+ [Da]	ΔM [ppm]	First Scan	Last Scan	RT [min]	MSOrder	Ions Matched	Annotation
	VLmTmFGLVmLPQLFACSNNqSAGIEAIKSK	1	1	CID	M3(Oxidation) M5(Oxidation) M10(Oxidation) Q21(Deamidated)	2.51319	0.755946	0.284597	2	3	3390.68	-2.13168	4594	4594	77.2281	MS2	13/120
gi221231220	8.7	4	494	0	hypothetical protein SPN23F_03140 [Streptococcus pneumoniae ATCC 700669]
	Sequence	# Proteins	# Protein Groups	Activation Type	Modifications	Probability	XCorr	Δ Score	Rank	Charge	MH+ [Da]	ΔM [ppm]	First Scan	Last Scan	RT [min]	MSOrder	Ions Matched	Annotation
	VSEAAVKKIELLmnDLGITPADR	2	1	CID	M13(Oxidation) N14(Deamidated)	11.1248	1.74634	0	1	5	2500.36	23.7123	1706	1706	40.8093	MS2	37/176
	MLEDFHAARVLPGYEPDnK	2	1	CID	N18(Deamidated)	3.86454	0.876605	0.355796	2	3	2203.05	1.51189	3707	3707	64.4606	MS2	16/72
	VSEAAVKKIELLmnDLGITPADRK	2	1	CID	M13(Oxidation) N14(Deamidated)	9.33157	0.555199	0.222914	2	5	2628.45	23.5299	556	556	27.0746	MS2	30/184
	VSEAAVKKIELLmnDLGITPADR	2	1	CID	M13(Oxidation) N14(Deamidated)	5.41129	0.538879	0.443273	3	5	2500.36	23.2546	5357	5357	92.1563	MS2	26/176
gi221231346	6.05	3	777	0	type I restriction-modification system R protein [Streptococcus pneumoniae ATCC 700669]
	Sequence	# Proteins	# Protein Groups	Activation Type	Modifications	Probability	XCorr	Δ Score	Rank	Charge	MH+ [Da]	ΔM [ppm]	First Scan	Last Scan	RT [min]	MSOrder	Ions Matched	Annotation
	IEVRGDK	1	1	CID		2.54649	1.11578	0	1	2	816.461	3.91001	3511	3511	62.1408	MS2	8/12
	LNSFEIYLGLYQqLTGEDGTETHYqKFDK	1	1	CID	Q13(Deamidated) Q25(Deamidated)	2.59867	1.07459	0.120737	2	3	3439.62	-1.26678	528	528	26.6257	MS2	12/112
	ENLDLVqEDYR	1	1	CID	Q7(Deamidated)	3.85064	0.744719	0.586545	2	2	1394.65	7.82542	2599	2599	51.1567	MS2	6/20
gi221232052	2.95	4	1083	0	lantibiotic synthetase [Streptococcus pneumoniae ATCC 700669]
	Sequence	# Proteins	# Protein Groups	Activation Type	Modifications	Probability	XCorr	Δ Score	Rank	Charge	MH+ [Da]	ΔM [ppm]	First Scan	Last Scan	RT [min]	MSOrder	Ions Matched	Annotation
	YQNFFnISGMELAIqqIK	1	1	CID	N6(Deamidated) Q15(Deamidated) Q16(Deamidated)	14.8514	1.37312	0	1	2	2147.05	8.59431	2512	2512	50.1	MS2	9/34
	YQnFFNISGMELAIqqIK	1	1	CID	N3(Deamidated) Q15(Deamidated) Q16(Deamidated)	14.8514	1.10771	0.193292	2	2	2147.05	8.59431	2512	2512	50.1	MS2	9/34
	YqNFFNISGMELAIqqIK	1	1	CID	Q2(Deamidated) Q15(Deamidated) Q16(Deamidated)	14.8514	1.10703	0.193785	3	2	2147.05	8.59431	2512	2512	50.1	MS2	9/34
	FQnLLSWYNLKFNK	1	1	CID	N3(Deamidated)	3.48279	0.593964	0.596031	4	3	1815.93	-8.34387	3824	3824	66.0536	MS2	11/52
gi221232100	3.31	2	574	0	ABC transporter ATP-binding protein [Streptococcus pneumoniae ATCC 700669]
	Sequence	# Proteins	# Protein Groups	Activation Type	Modifications	Probability	XCorr	Δ Score	Rank	Charge	MH+ [Da]	ΔM [ppm]	First Scan	Last Scan	RT [min]	MSOrder	Ions Matched	Annotation
	GRIDLYLDGLSPLnLEQWR	2	1	CID	N14(Deamidated)	2.93537	1.58423	0.711639	5	3	2259.2	20.0873	4450	4450	74.9143	MS2	13/72
	GRIDLYLDGLSPLNLEqWR	2	1	CID	Q17(Deamidated)	2.93537	1.49316	0.728215	7	3	2259.2	20.0873	4450	4450	74.9143	MS2	13/72
gi221232678	2.71	2	996	0	lantibiotic modifying enzyme [Streptococcus pneumoniae ATCC 700669]
	Sequence	# Proteins	# Protein Groups	Activation Type	Modifications	Probability	XCorr	Δ Score	Rank	Charge	MH+ [Da]	ΔM [ppm]	First Scan	Last Scan	RT [min]	MSOrder	Ions Matched	Annotation
	EENILNFYNKYPVLLR	3	1	CID		2.71426	0.992496	0	1	3	2025.06	-18.0392	2873	2873	54.5941	MS2	10/60
	EKALENLWSnK	3	1	CID	N10(Deamidated)	3.72428	0.549952	0.727252	2	2	1332.69	9.301	2883	2883	54.7096	MS2	5/20
gi182683078	4.64	1	302	0	amino acid ABC transporter periplasmic amino acid-binding protein, [Streptococcus pneumoniae CGSP14]
	Sequence	# Proteins	# Protein Groups	Activation Type	Modifications	Probability	XCorr	Δ Score	Rank	Charge	MH+ [Da]	ΔM [ppm]	First Scan	Last Scan	RT [min]	MSOrder	Ions Matched	Annotation
	DEYRSIIYTIKKNK	2	1	CID		9.71635	0.473029	0	1	3	1770.98	1.01397	880	880	31.131	MS2	11/52
gi182683421	10.9	1	156	0	degenerate transposase [Streptococcus pneumoniae CGSP14]
	Sequence	# Proteins	# Protein Groups	Activation Type	Modifications	Probability	XCorr	Δ Score	Rank	Charge	MH+ [Da]	ΔM [ppm]	First Scan	Last Scan	RT [min]	MSOrder	Ions Matched	Annotation
	HSEYTYQLLTCYPNPQK	1	1	CID		5.74079	0.614513	0.0628801	2	2	2084.96	-12.1814	1142	1142	34.3095	MS2	6/32
gi182683467	10.71	1	112	0	blpS protein [Streptococcus pneumoniae CGSP14]
	Sequence	# Proteins	# Protein Groups	Activation Type	Modifications	Probability	XCorr	Δ Score	Rank	Charge	MH+ [Da]	ΔM [ppm]	First Scan	Last Scan	RT [min]	MSOrder	Ions Matched	Annotation
	HmIIQTQKTVYK	1	1	CID	M2(Oxidation)	15.6116	1.05177	0	1	2	1505.83	14.0325	2532	2532	50.2987	MS2	7/22
gi182683508	9.95	5	382	0	hypothetical protein SPCG_0538 [Streptococcus pneumoniae CGSP14]
	Sequence	# Proteins	# Protein Groups	Activation Type	Modifications	Probability	XCorr	Δ Score	Rank	Charge	MH+ [Da]	ΔM [ppm]	First Scan	Last Scan	RT [min]	MSOrder	Ions Matched	Annotation
	MFPnqDVLPK	2	2	CID	N4(Deamidated) Q5(Deamidated)	2.10111	0.65036	0	1	2	1190.58	1.43102	4698	4698	79.0952	MS2	6/18
	FEEmFQLqSSHLTTqEK	1	1	CID	M4(Oxidation) Q8(Deamidated) Q15(Deamidated)	3.46417	0.570638	0.180634	2	2	2100.96	13.9705	1038	1038	33.1738	MS2	4/32
	FEEmFqLQSSHLTTqEK	1	1	CID	M4(Oxidation) Q6(Deamidated) Q15(Deamidated)	11.1574	0.521119	0.251737	3	2	2100.96	13.9705	1038	1038	33.1738	MS2	4/32
	EAGLTIRRIAR	2	2	CID		5.67065	0.483172	0	1	2	1255.76	-1.29706	3326	3326	60.0504	MS2	6/20
	FEEmFQLqSSHLTTqEK	1	1	CID	M4(Oxidation) Q8(Deamidated) Q15(Deamidated)	8.17769	0.427553	0	1	2	2100.95	10.7967	799	799	30.1499	MS2	5/32
gi182683741	1.89	1	424	0	phosphopentomutase [Streptococcus pneumoniae CGSP14]
	Sequence	# Proteins	# Protein Groups	Activation Type	Modifications	Probability	XCorr	Δ Score	Rank	Charge	MH+ [Da]	ΔM [ppm]	First Scan	Last Scan	RT [min]	MSOrder	Ions Matched	Annotation
	KEnRRGHK	2	1	CID	N3(Deamidated)	13.5908	0.498126	0	1	2	1025.56	5.04171	3231	3231	58.8186	MS2	3/14
gi182684275	5.83	6	2077	0	SNF2 family protein [Streptococcus pneumoniae CGSP14]
	Sequence	# Proteins	# Protein Groups	Activation Type	Modifications	Probability	XCorr	Δ Score	Rank	Charge	MH+ [Da]	ΔM [ppm]	First Scan	Last Scan	RT [min]	MSOrder	Ions Matched	Annotation
	MTLFLRYQAQHFDEK	1	1	CID		14.4078	1.20513	0	1	2	1926.97	15.6463	4445	4445	74.8503	MS2	9/28
	YIKQIMTSKEPIRAAEDIDEqTMTASDFK	4	3	CID	Q21(Deamidated)	4.03731	1.02009	0	1	4	3360.64	9.01774	1040	1040	33.1992	MS2	21/168
	RKqFVSRIITGDYDAIVIGDSQFEK	4	3	CID	Q3(Deamidated)	4.4023	1.00131	0.346269	3	5	2886.51	11.0221	773	773	29.8538	MS2	30/192
	EGMEnKATqMIFSDIGTPK	2	2	CID	N5(Deamidated) Q9(Deamidated)	5.21552	0.572294	0	1	2	2098.96	-10.4186	4491	4491	75.6315	MS2	4/36
	NVDmEmKVRQIQEEHDFK	4	3	CID	M4(Oxidation) M6(Oxidation)	2.07478	0.543914	0	1	2	2308.09	15.2472	4406	4406	74.264	MS2	5/34
	IPVSKERQMNYIEDK	4	3	CID		8.07894	0.506551	0.192212	2	3	1849.96	9.07996	2045	2045	44.5614	MS2	10/56
gi182684866	20.18	3	114	0	MarR family transcriptional regulator [Streptococcus pneumoniae CGSP14]
	Sequence	# Proteins	# Protein Groups	Activation Type	Modifications	Probability	XCorr	Δ Score	Rank	Charge	MH+ [Da]	ΔM [ppm]	First Scan	Last Scan	RT [min]	MSOrder	Ions Matched	Annotation
	IVQnGLVELEASPVDK	2	1	CID	N4(Deamidated)	3.67449	0.85645	0	1	2	1711.9	-10.787	3887	3887	66.8255	MS2	8/30
	IVqNGLVELEASPVDK	2	1	CID	Q3(Deamidated)	3.67449	0.77305	0.0973789	3	2	1711.9	-10.787	3887	3887	66.8255	MS2	8/30
	FLDnREK	2	1	CID	N4(Deamidated)	4.53507	0.719334	0.0506304	2	2	922.463	-0.162182	1789	1789	41.7339	MS2	8/12
gi116515501	19.05	1	168	0	hypothetical protein SPD_0282 [Streptococcus pneumoniae D39]
	Sequence	# Proteins	# Protein Groups	Activation Type	Modifications	Probability	XCorr	Δ Score	Rank	Charge	MH+ [Da]	ΔM [ppm]	First Scan	Last Scan	RT [min]	MSOrder	Ions Matched	Annotation
	IqMLISIGLLVLTWTSWFTNLFPIFENNQVAR	1	1	CID	Q2(Deamidated)	3.5525	1.70115	0	1	4	3765.99	-17.4801	3769	3769	65.2683	MS2	23/186
gi116516033	3.88	1	412	0	UDP-glucose 6-dehydrogenase, [Streptococcus pneumoniae D39]
	Sequence	# Proteins	# Protein Groups	Activation Type	Modifications	Probability	XCorr	Δ Score	Rank	Charge	MH+ [Da]	ΔM [ppm]	First Scan	Last Scan	RT [min]	MSOrder	Ions Matched	Annotation
	SnSDNFRQSSIQGImK	1	1	CID	N2(Deamidated) M15(Oxidation)	5.23441	0.498961	0	1	3	1828.85	0.222262	1776	1776	41.587	MS2	9/60
gi116515779	3.85	3	623	0	type II restriction endonuclease, [Streptococcus pneumoniae D39]
	Sequence	# Proteins	# Protein Groups	Activation Type	Modifications	Probability	XCorr	Δ Score	Rank	Charge	MH+ [Da]	ΔM [ppm]	First Scan	Last Scan	RT [min]	MSOrder	Ions Matched	Annotation
	AGQTPKNWMEKMLEDK	2	1	CID		2.45111	0.855601	0	1	2	1905.93	6.71997	1166	1166	34.5958	MS2	4/30
	SILITPAR	2	1	CID		5.41767	0.582647	0	1	2	870.54	-0.867744	1825	1825	42.1476	MS2	4/14
	SILITPAR	2	1	CID		3.49207	0.43018	0.244976	2	2	870.541	0.108818	1561	1561	39.1505	MS2	3/14
gi116516930	60	2	55	0	hypothetical protein SPD_1674 [Streptococcus pneumoniae D39]
	Sequence	# Proteins	# Protein Groups	Activation Type	Modifications	Probability	XCorr	Δ Score	Rank	Charge	MH+ [Da]	ΔM [ppm]	First Scan	Last Scan	RT [min]	MSOrder	Ions Matched	Annotation
	HCFEVVDETDEVSnHTYGKVKLTWFEEIFEEYK	1	1	CID	N14(Deamidated)	9.49632	1.83252	0.0162397	2	4	4051.82	-39.641	1196	1196	34.9267	MS2	27/192
	LTWFEEIFEEYK	1	1	CID		6.01368	0.572705	0	1	2	1633.78	6.0822	2738	2738	52.9195	MS2	4/22
gi194397931	2.01	3	1241	0	phosphoribosylformylglycinamide synthetase [Streptococcus pneumoniae G54]
	Sequence	# Proteins	# Protein Groups	Activation Type	Modifications	Probability	XCorr	Δ Score	Rank	Charge	MH+ [Da]	ΔM [ppm]	First Scan	Last Scan	RT [min]	MSOrder	Ions Matched	Annotation
	FLDTnGVR	1	1	CID	N5(Deamidated)	3.69123	0.757696	0	1	2	922.463	-0.162182	1789	1789	41.7339	MS2	8/14
	DIDATELEAVK	1	1	CID		3.14744	0.706854	0	1	2	1203.61	-3.41011	2478	2478	49.6837	MS2	5/20
	FLDTNGVRVVVDAK	1	1	CID		4.89986	0.588349	0	1	2	1532.83	-12.2211	2521	2521	50.1929	MS2	7/26
gi194397634	2.04	1	737	0	family 31 glycosyl hydrolase [Streptococcus pneumoniae G54]
	Sequence	# Proteins	# Protein Groups	Activation Type	Modifications	Probability	XCorr	Δ Score	Rank	Charge	MH+ [Da]	ΔM [ppm]	First Scan	Last Scan	RT [min]	MSOrder	Ions Matched	Annotation
	LRHqmIPYLYTmNVK	2	1	CID	Q4(Deamidated) M5(Oxidation) M12(Oxidation)	4.35673	0.669084	0	1	2	1939.96	-15.9322	2887	2887	54.7457	MS2	5/28
gi194398579	9.29	2	495	0	PTS system transporter subunit IIBCA [Streptococcus pneumoniae G54]
	Sequence	# Proteins	# Protein Groups	Activation Type	Modifications	Probability	XCorr	Δ Score	Rank	Charge	MH+ [Da]	ΔM [ppm]	First Scan	Last Scan	RT [min]	MSOrder	Ions Matched	Annotation
	SDIQDILDSGEIIPETLPSQMTEAQQNTVHFK	8	1	CID		32.4067	1.75265	0	1	3	3584.75	6.11111	4657	4657	78.2855	MS2	22/124
	VnIVDVDACmTRLR	7	1	CID	N2(Deamidated) M10(Oxidation)	3.04528	0.872017	0	1	4	1621.81	4.51594	985	985	32.4568	MS2	19/78
gi194396911	6.03	6	2074	0	Tn5253 SNF2-related: helicase [Streptococcus pneumoniae G54]
	Sequence	# Proteins	# Protein Groups	Activation Type	Modifications	Probability	XCorr	Δ Score	Rank	Charge	MH+ [Da]	ΔM [ppm]	First Scan	Last Scan	RT [min]	MSOrder	Ions Matched	Annotation
	YIKQIMTSKEPIRAAEDIDEqTMTASDFK	4	3	CID	Q21(Deamidated)	4.03731	1.02009	0	1	4	3360.64	9.01774	1040	1040	33.1992	MS2	21/168
	RKqFVSRIITGDYDAIVIGDSQFEK	4	3	CID	Q3(Deamidated)	4.4023	1.00131	0.346269	3	5	2886.51	11.0221	773	773	29.8538	MS2	30/192
	GIPSMEIAFVHDANSDEKK	1	1	CID		2.22334	0.62701	0	1	2	2088.01	4.78091	2390	2390	48.6706	MS2	7/36
	EGMEnKATqMIFSDIGTPK	2	2	CID	N5(Deamidated) Q9(Deamidated)	5.21552	0.572294	0	1	2	2098.96	-10.4186	4491	4491	75.6315	MS2	4/36
	NVDmEmKVRQIQEEHDFK	4	3	CID	M4(Oxidation) M6(Oxidation)	2.07478	0.543914	0	1	2	2308.09	15.2472	4406	4406	74.264	MS2	5/34
	IPVSKERQMNYIEDK	4	3	CID		8.07894	0.506551	0.192212	2	3	1849.96	9.07996	2045	2045	44.5614	MS2	10/56
gi194398299	3.14	1	574	0	ABC transporter ATP-binding protein [Streptococcus pneumoniae G54]
	Sequence	# Proteins	# Protein Groups	Activation Type	Modifications	Probability	XCorr	Δ Score	Rank	Charge	MH+ [Da]	ΔM [ppm]	First Scan	Last Scan	RT [min]	MSOrder	Ions Matched	Annotation
	SPLnLEqWRSWIAYVPQK	1	1	CID	N4(Deamidated) Q7(Deamidated)	10.8412	0.422844	0	1	2	2217.13	-3.30047	4436	4436	74.7269	MS2	4/34
gi194396895	11.27	1	142	0	ABC transporter permease [Streptococcus pneumoniae G54]
	Sequence	# Proteins	# Protein Groups	Activation Type	Modifications	Probability	XCorr	Δ Score	Rank	Charge	MH+ [Da]	ΔM [ppm]	First Scan	Last Scan	RT [min]	MSOrder	Ions Matched	Annotation
	SDIFnRVLDYSqTEIK	2	1	CID	N5(Deamidated) Q12(Deamidated)	8.08483	0.541068	0.0954034	2	2	1929.93	-17.8882	2142	2142	45.7708	MS2	3/30
gi194397459	6.06	1	264	0	pyruvate formate-lyase 1-activating enzyme [Streptococcus pneumoniae G54]
	Sequence	# Proteins	# Protein Groups	Activation Type	Modifications	Probability	XCorr	Δ Score	Rank	Charge	MH+ [Da]	ΔM [ppm]	First Scan	Last Scan	RT [min]	MSOrder	Ions Matched	Annotation
	nAKqLmDTESYQDYMK	1	1	CID	N1(Deamidated) Q4(Deamidated) M6(Oxidation)	7.37865	0.573491	0	1	2	1982.85	12.3338	2095	2095	45.1682	MS2	4/30
gi169834511	4.02	5	1743	0	endo-alpha-N-acetylgalactosaminidase [Streptococcus pneumoniae Hungary19A-6]
	Sequence	# Proteins	# Protein Groups	Activation Type	Modifications	Probability	XCorr	Δ Score	Rank	Charge	MH+ [Da]	ΔM [ppm]	First Scan	Last Scan	RT [min]	MSOrder	Ions Matched	Annotation
	VGEDQGSPEVTDGPKTEEELLALEK	9	2	CID		16.705	1.8008	0	1	3	2670.3	-1.48559	3129	3129	57.7104	MS2	16/96
	WEDLKK	10	2	CID		7.56066	0.781251	0	1	2	818.442	0.976689	1826	1826	42.1529	MS2	5/10
	INETTAEYLMKLR	6	2	CID		3.14433	0.7202	0.0544702	3	3	1581.82	-7.5391	2177	2177	46.1687	MS2	13/48
	DNQEEVASVQASMK	10	2	CID		11.7519	0.538589	0.341266	3	2	1535.71	10.66	3598	3598	63.2119	MS2	5/26
	TVTPEWQTVANK	1	1	CID		2.92366	0.47098	0.509148	4	2	1373.72	10.2228	4566	4566	76.8823	MS2	5/22
gi169832380	5.19	2	771	0	hypothetical protein SPH_1246 [Streptococcus pneumoniae Hungary19A-6]
	Sequence	# Proteins	# Protein Groups	Activation Type	Modifications	Probability	XCorr	Δ Score	Rank	Charge	MH+ [Da]	ΔM [ppm]	First Scan	Last Scan	RT [min]	MSOrder	Ions Matched	Annotation
	EEVLPSTAnTLYYqALYqnGLMQVK	1	1	CID	N9(Deamidated) Q14(Deamidated) Q18(Deamidated) N19(Deamidated)	3.39374	1.17351	0.218387	4	3	2877.35	-23.5897	820	820	30.4417	MS2	13/96
	TNIQTGSNFLIYNVK	5	2	CID		9.58549	0.78831	0.0795608	2	2	1711.9	-0.851006	3887	3887	66.8255	MS2	8/28
gi225853711	5.6	1	232	0	response regulator SaeR [Streptococcus pneumoniae JJA]
	Sequence	# Proteins	# Protein Groups	Activation Type	Modifications	Probability	XCorr	Δ Score	Rank	Charge	MH+ [Da]	ΔM [ppm]	First Scan	Last Scan	RT [min]	MSOrder	Ions Matched	Annotation
	GCETELISLGNLK	1	1	CID		4.11466	0.955168	0	1	3	1376.72	7.5561	2413	2413	48.8841	MS2	15/48
gi225853942	4.07	5	1767	0	endo-alpha-N-acetylgalactosaminidase [Streptococcus pneumoniae JJA]
	Sequence	# Proteins	# Protein Groups	Activation Type	Modifications	Probability	XCorr	Δ Score	Rank	Charge	MH+ [Da]	ΔM [ppm]	First Scan	Last Scan	RT [min]	MSOrder	Ions Matched	Annotation
	VGEDQGSPEVTDGPKTEEELLALEK	9	2	CID		16.705	1.8008	0	1	3	2670.3	-1.48559	3129	3129	57.7104	MS2	16/96
	WEDLKK	10	2	CID		7.56066	0.781251	0	1	2	818.442	0.976689	1826	1826	42.1529	MS2	5/10
	INETTAEYLMKLR	6	2	CID		3.14433	0.7202	0.0544702	3	3	1581.82	-7.5391	2177	2177	46.1687	MS2	13/48
	SnAKASVTVnTGEK	1	1	CID	N2(Deamidated) N10(Deamidated)	3.21896	0.706432	0	1	2	1407.69	-2.71426	4589	4589	77.144	MS2	6/26
	DNQEEVASVQASMK	10	2	CID		11.7519	0.538589	0.341266	3	2	1535.71	10.66	3598	3598	63.2119	MS2	5/26
gi225854171	3.93	13	2138	0	serine protease [Streptococcus pneumoniae JJA]
	Sequence	# Proteins	# Protein Groups	Activation Type	Modifications	Probability	XCorr	Δ Score	Rank	Charge	MH+ [Da]	ΔM [ppm]	First Scan	Last Scan	RT [min]	MSOrder	Ions Matched	Annotation
	IFNGGAIETTQDnLnK	1	1	CID	N13(Deamidated) N15(Deamidated)	4.00934	0.955575	0	1	2	1736.83	-1.1241	4056	4056	69.0251	MS2	5/30
	NLGnGKEGSLK	5	3	CID	N4(Deamidated)	2.81484	0.902511	0	1	2	1117.58	-3.61294	1110	1110	33.9556	MS2	7/20
	NEVVATFKnTDSK	10	3	CID	N9(Deamidated)	5.87907	0.773577	0	1	2	1453.7	-12.4619	3254	3254	59.1176	MS2	5/24
	LWNmInPnKKTEVK	5	3	CID	M4(Oxidation) N6(Deamidated) N8(Deamidated)	2.30055	0.752721	0	2	3	1732.89	-5.39538	1739	1739	41.1498	MS2	11/52
	LWnmINPnKKTEVK	5	3	CID	N3(Deamidated) M4(Oxidation) N8(Deamidated)	2.30055	0.738168	0.0193335	5	3	1732.89	-5.39538	1739	1739	41.1498	MS2	11/52
	IFnGGAIETTqDnLnK	1	1	CID	N3(Deamidated) Q11(Deamidated) N13(Deamidated) N15(Deamidated)	11.4574	0.733527	0	1	2	1738.79	-12.9793	822	822	30.4541	MS2	5/30
	IFNGGAIETTqDnLNK	1	1	CID	Q11(Deamidated) N13(Deamidated)	4.00934	0.668696	0.300216	4	2	1736.83	-1.1241	4056	4056	69.0251	MS2	6/30
	LWnmInPNKKTEVK	5	3	CID	N3(Deamidated) M4(Oxidation) N6(Deamidated)	2.30055	0.645367	0.142621	6	3	1732.89	-5.39538	1739	1739	41.1498	MS2	9/52
	DnQDPATKIR	10	3	CID	N2(Deamidated)	18.0199	0.621822	0	1	2	1158.56	-11.3511	2769	2769	53.2393	MS2	5/18
	IKEENSnK	1	1	CID	N7(Deamidated)	6.6116	0.551436	0.186713	5	2	962.481	2.1694	2086	2086	45.0656	MS2	6/14
	DNqDPATKIR	10	3	CID	Q3(Deamidated)	18.0199	0.525193	0.155396	2	2	1158.56	-11.3511	2769	2769	53.2393	MS2	5/18
	IFnGGAIETTQDnLNK	1	1	CID	N3(Deamidated) N13(Deamidated)	4.00934	0.491065	0.486105	6	2	1736.83	-1.1241	4056	4056	69.0251	MS2	6/30
	RTVELDYKYDDK	3	2	CID		2.59595	0.48534	0	1	2	1544.77	8.9527	2775	2775	53.3038	MS2	3/22
gi225855083	1.11	1	902	0	efflux ABC transporter, permease protein [Streptococcus pneumoniae JJA]
	Sequence	# Proteins	# Protein Groups	Activation Type	Modifications	Probability	XCorr	Δ Score	Rank	Charge	MH+ [Da]	ΔM [ppm]	First Scan	Last Scan	RT [min]	MSOrder	Ions Matched	Annotation
	DLIQSFTGSK	1	1	CID		9.15323	0.414186	0.249832	3	2	1095.56	-10.3244	4327	4327	73.0582	MS2	6/18
gi225855356	3.46	7	2108	0	PblB [Streptococcus pneumoniae JJA]
	Sequence	# Proteins	# Protein Groups	Activation Type	Modifications	Probability	XCorr	Δ Score	Rank	Charge	MH+ [Da]	ΔM [ppm]	First Scan	Last Scan	RT [min]	MSOrder	Ions Matched	Annotation
	DKASKSELTqTAEELSSK	3	3	CID	Q10(Deamidated)	3.55428	1.0021	0	1	3	1952.97	3.4372	4307	4307	72.7489	MS2	13/68
	qKQAQAEAEIAK	1	1	CID	Q1(Deamidated)	4.3046	0.883823	0	1	2	1315.67	-11.1674	1646	1646	40.0841	MS2	7/22
	QKqAQAEAEIAK	1	1	CID	Q3(Deamidated)	4.3046	0.836255	0.0538213	3	2	1315.67	-11.1674	1646	1646	40.0841	MS2	7/22
	AIQELNQK	3	3	CID		2.27396	0.663849	0	1	2	943.521	-0.144854	2432	2432	49.1059	MS2	4/14
	DIASQIASYR	3	3	CID		2.03725	0.566626	0	1	2	1123.56	-10.3609	2439	2439	49.1954	MS2	4/18
	AGNDTQYSYEGTITK	1	1	CID		6.8207	0.512871	0	1	3	1647.74	-9.80898	1294	1294	36.1734	MS2	11/56
	DFNDQVELAK	1	1	CID		2.43896	0.442084	0.493063	3	2	1178.58	9.68751	2474	2474	49.6366	MS2	4/18
gi225856031	3.21	2	1463	0	DNA polymerase III PolC [Streptococcus pneumoniae P1031]
	Sequence	# Proteins	# Protein Groups	Activation Type	Modifications	Probability	XCorr	Δ Score	Rank	Charge	MH+ [Da]	ΔM [ppm]	First Scan	Last Scan	RT [min]	MSOrder	Ions Matched	Annotation
	AMEQLEQmAPPPAEEKPAFDFQTKK	1	1	CID	M8(Oxidation)	3.39374	1.38231	0.0793154	2	3	2877.35	-28.3707	820	820	30.4417	MS2	11/96
	GDLYTPFIDKAEETVAELTYKK	1	1	CID		2.06005	0.869398	0	1	2	2531.27	-17.9321	3127	3127	57.684	MS2	7/42
gi225856339	5.37	12	2143	0	serine protease [Streptococcus pneumoniae P1031]
	Sequence	# Proteins	# Protein Groups	Activation Type	Modifications	Probability	XCorr	Δ Score	Rank	Charge	MH+ [Da]	ΔM [ppm]	First Scan	Last Scan	RT [min]	MSOrder	Ions Matched	Annotation
	QIEGISSVERAqKVQPMMNHAR	4	2	CID	Q12(Deamidated)	4.27339	1.33429	0.241568	3	3	2510.28	16.1561	2548	2548	50.4766	MS2	12/84
	QIEGISSVERAQKVqPMMNHAR	4	2	CID	Q15(Deamidated)	4.27339	1.21924	0.306959	4	3	2510.28	16.1561	2548	2548	50.4766	MS2	9/84
	DTTGVEHHHQENEESIK	4	2	CID		2.7117	1.04559	0.634369	2	2	1989.89	2.38614	2707	2707	52.5676	MS2	7/32
	NLGnGKEGSLK	5	3	CID	N4(Deamidated)	2.81484	0.902511	0	1	2	1117.58	-3.61294	1110	1110	33.9556	MS2	7/20
	IFnGSAIETTPDnLDK	8	2	CID	N3(Deamidated) N13(Deamidated)	4.00934	0.863336	0.0965264	2	2	1736.83	10.1059	4056	4056	69.0251	MS2	4/30
	NEVVATFKnTDSK	10	3	CID	N9(Deamidated)	5.87907	0.773577	0	1	2	1453.7	-12.4619	3254	3254	59.1176	MS2	5/24
	LWNmInPnKKTEVK	5	3	CID	M4(Oxidation) N6(Deamidated) N8(Deamidated)	2.30055	0.752721	0	2	3	1732.89	-5.39538	1739	1739	41.1498	MS2	11/52
	LWnmINPnKKTEVK	5	3	CID	N3(Deamidated) M4(Oxidation) N8(Deamidated)	2.30055	0.738168	0.0193335	5	3	1732.89	-5.39538	1739	1739	41.1498	MS2	11/52
	LWnmInPNKKTEVK	5	3	CID	N3(Deamidated) M4(Oxidation) N6(Deamidated)	2.30055	0.645367	0.142621	6	3	1732.89	-5.39538	1739	1739	41.1498	MS2	9/52
	DnQDPATKIR	10	3	CID	N2(Deamidated)	18.0199	0.621822	0	1	2	1158.56	-11.3511	2769	2769	53.2393	MS2	5/18
	DNqDPATKIR	10	3	CID	Q3(Deamidated)	18.0199	0.525193	0.155396	2	2	1158.56	-11.3511	2769	2769	53.2393	MS2	5/18
	RTVELDYKYDDK	3	2	CID		2.59595	0.48534	0	1	2	1544.77	8.9527	2775	2775	53.3038	MS2	3/22
gi225856560	3.58	3	1033	0	DNA polymerase III DnaE [Streptococcus pneumoniae P1031]
	Sequence	# Proteins	# Protein Groups	Activation Type	Modifications	Probability	XCorr	Δ Score	Rank	Charge	MH+ [Da]	ΔM [ppm]	First Scan	Last Scan	RT [min]	MSOrder	Ions Matched	Annotation
	IqSRDGRLQmIAQEIR	11	1	CID	Q2(Deamidated) M10(Oxidation)	4.16224	0.751471	0.323972	5	3	1931	-15.5347	5589	5589	96.9477	MS2	16/60
	FLSLSSVGYQqLMK	2	1	CID	Q11(Deamidated)	10.1272	0.683816	0	1	2	1601.83	8.2719	2041	2041	44.5253	MS2	3/26
	FGVPEYK	1	1	CID		3.14132	0.590247	0	1	2	839.428	-1.41897	2917	2917	55.0589	MS2	5/12
gi225856951	12.4	1	121	0	hypothetical protein SPP_1328 [Streptococcus pneumoniae P1031]
	Sequence	# Proteins	# Protein Groups	Activation Type	Modifications	Probability	XCorr	Δ Score	Rank	Charge	MH+ [Da]	ΔM [ppm]	First Scan	Last Scan	RT [min]	MSOrder	Ions Matched	Annotation
	GDYSYLLFYNEEKEK	6	1	CID		2.14089	0.933801	0	1	2	1897.89	4.21474	3442	3442	61.3004	MS2	5/28
gi225857338	9.97	3	321	0	sucrose operon repressor (Scr operon regulatory protein) [Streptococcus pneumoniae P1031]
	Sequence	# Proteins	# Protein Groups	Activation Type	Modifications	Probability	XCorr	Δ Score	Rank	Charge	MH+ [Da]	ΔM [ppm]	First Scan	Last Scan	RT [min]	MSOrder	Ions Matched	Annotation
	TIQKVNEAmRELSYKPNNLAR	1	1	CID	M9(Oxidation)	6.56983	1.89756	0	1	3	2491.29	-17.9927	3959	3959	67.6626	MS2	15/80
	TIQKVNEAmRELSYKPNNLAR	1	1	CID	M9(Oxidation)	4.72966	1.21473	0.461011	3	3	2491.29	-16.8941	3681	3681	64.1693	MS2	9/80
	LAGVSPTTVSR	1	1	CID		3.01877	0.969964	0	1	2	1087.6	-9.52948	2481	2481	49.7281	MS2	7/20
gi225860023	3.84	2	521	0	DNA primase [Streptococcus pneumoniae Taiwan19F-14]
	Sequence	# Proteins	# Protein Groups	Activation Type	Modifications	Probability	XCorr	Δ Score	Rank	Charge	MH+ [Da]	ΔM [ppm]	First Scan	Last Scan	RT [min]	MSOrder	Ions Matched	Annotation
	LLCIFSGnDLPR	1	1	CID	N8(Deamidated)	7.12428	0.879368	0	1	2	1348.69	-4.37107	4429	4429	74.6313	MS2	7/22
	SLQPVEAR	1	1	CID		2.75571	0.467709	0	1	2	899.492	-2.07206	1478	1478	38.1406	MS2	4/14
gi225860365	5.69	3	633	0	oligohyaluronate lyase [Streptococcus pneumoniae Taiwan19F-14]
	Sequence	# Proteins	# Protein Groups	Activation Type	Modifications	Probability	XCorr	Δ Score	Rank	Charge	MH+ [Da]	ΔM [ppm]	First Scan	Last Scan	RT [min]	MSOrder	Ions Matched	Annotation
	EDLLnGLDVK	12	1	CID	N5(Deamidated)	24.8311	1.54972	0.322611	2	2	1116.58	-1.4054	1958	1958	43.6648	MS2	13/18
	CQGQHEVLTQFILDK	2	1	CID		3.50599	0.69155	0	1	2	1758.89	2.85333	1013	1013	32.8423	MS2	6/28
	DYEKVKSSLER	12	1	CID		17.1294	0.571144	0	1	2	1353.69	-8.12468	3864	3864	66.5343	MS2	8/20
gi225861034	6.57	7	898	0	phosphoenolpyruvate carboxylase [Streptococcus pneumoniae Taiwan19F-14]
	Sequence	# Proteins	# Protein Groups	Activation Type	Modifications	Probability	XCorr	Δ Score	Rank	Charge	MH+ [Da]	ΔM [ppm]	First Scan	Last Scan	RT [min]	MSOrder	Ions Matched	Annotation
	DAAYYnLEMLVSAAINRMITHKKSDTNTPNR	1	1	CID	N6(Deamidated)	4.27042	1.64471	0.203118	2	4	3538.75	9.26204	3110	3110	57.4909	MS2	24/180
	DAAYYnLEMLVSAAINRMITHKKSDTNTPNR	1	1	CID	N6(Deamidated)	7.12247	1.55332	0	1	4	3538.75	10.2386	2360	2360	48.3668	MS2	26/180
	DAAYYNLEMLVSAAINRMITHKKSDTNTPnR	1	1	CID	N30(Deamidated)	7.81512	1.5062	0	1	4	3538.75	5.35579	5667	5667	98.8009	MS2	29/180
	DAAYYNLEMLVSAAINRMITHKKSDTnTPNR	1	1	CID	N27(Deamidated)	7.81512	1.42127	0.0563876	2	4	3538.75	5.35579	5667	5667	98.8009	MS2	28/180
	AIPWVFSWSQSR	10	2	CID		3.29038	0.665199	0	1	3	1463.75	5.95577	1446	1446	37.8249	MS2	5/44
	KIYQLYR	10	2	CID		2.72122	0.466196	0	1	2	983.561	-6.26958	3214	3214	58.6328	MS2	3/12
	ELAIFKTAR	10	2	CID		2.78583	0.455324	0	1	2	1048.62	4.54313	4158	4158	70.5125	MS2	4/16
gi298502391	6.46	1	387	0	ABC superfamily transporter membrane protein [Streptococcus pneumoniae TCH8431/19A]
	Sequence	# Proteins	# Protein Groups	Activation Type	Modifications	Probability	XCorr	Δ Score	Rank	Charge	MH+ [Da]	ΔM [ppm]	First Scan	Last Scan	RT [min]	MSOrder	Ions Matched	Annotation
	LSDLASVSKIKGLEnVSPELETVAK	2	1	CID	N15(Deamidated)	8.92356	0.714463	0	1	5	2628.45	17.0249	556	556	27.0746	MS2	22/192

## Sheet: 5074-5 (3)
Accession #	Coverage	# Peptides	#AAs	Score	Description
gi307067664	6.23	9	289	10.3016	hypothetical protein SPAP_1039 [Streptococcus pneumoniae AP200]
	Sequence	# Proteins	# Protein Groups	Activation Type	Modifications	Probability	XCorr	Δ Score	Rank	Charge	MH+ [Da]	ΔM [ppm]	First Scan	Last Scan	RT [min]	MSOrder	Ions Matched	Annotation
	NELSASELAAAqAYWNGK	1	1	CID	Q12(Deamidated)	45.6874	4.75838	0	1	2	1923.91	1.33827	2314	2314	52.2468	MS2	21/34
	nELSASELAAAQAYWNGK	1	1	CID	N1(Deamidated)	17.6335	3.69058	0.224404	3	2	1923.91	1.33827	2314	2314	52.2468	MS2	17/34
	NELSASELAAAQAYWnGK	1	1	CID	N16(Deamidated)	35.4144	3.61458	0.240375	4	2	1923.91	1.33827	2314	2314	52.2468	MS2	20/34
	NELSASELAAAqAYWNGK	1	1	CID	Q12(Deamidated)	42.8956	2.8991	0	2	2	1923.91	2.4369	2498	2498	55.276	MS2	18/34
	NELSASELAAAQAYWnGK	1	1	CID	N16(Deamidated)	20.429	2.64416	0	1	3	1923.91	3.27795	2366	2366	53.0922	MS2	20/68
	NELSASELAAAQAYWnGK	1	1	CID	N16(Deamidated)	23.9767	2.43984	0.158417	3	2	1923.91	2.4369	2498	2498	55.276	MS2	16/34
	NELSASELAAAqAYWNGK	1	1	CID	Q12(Deamidated)	39.3626	2.36179	0.106789	2	3	1923.91	3.27795	2366	2366	53.0922	MS2	21/68
	nELSASELAAAQAYWNGK	1	1	CID	N1(Deamidated)	23.9767	1.96661	0.321649	4	2	1923.91	2.4369	2498	2498	55.276	MS2	14/34
	nELSASELAAAQAYWNGK	1	1	CID	N1(Deamidated)	29.4239	1.86878	0.293245	4	3	1923.91	3.27795	2366	2366	53.0922	MS2	21/68
gi15901039	5.25	5	819	10.0193	hypothetical protein SP_1174 [Streptococcus pneumoniae TIGR4]
	Sequence	# Proteins	# Protein Groups	Activation Type	Modifications	Probability	XCorr	Δ Score	Rank	Charge	MH+ [Da]	ΔM [ppm]	First Scan	Last Scan	RT [min]	MSOrder	Ions Matched	Annotation
	NELSASELAAAEAYWNGK	7	1	CID		45.6874	4.75838	0	2	2	1923.91	1.33427	2314	2314	52.2468	MS2	21/34
	NELSASELAAAEAYWNGK	7	1	CID		42.8956	2.8991	0	1	2	1923.91	2.4329	2498	2498	55.276	MS2	18/34
	NELSASELAAAEAYWNGK	7	1	CID		39.3626	2.36179	0.106789	3	3	1923.91	3.27395	2366	2366	53.0922	MS2	21/68
	GYTLEDLLATVK	13	2	CID		19.5481	1.3205	0	1	2	1322.72	0.733564	2667	2667	58.3321	MS2	12/22
	FEWFDEGLYEAPK	14	2	CID		18.7062	1.16371	0	1	2	1630.75	2.57142	2409	2409	53.7724	MS2	10/24
gi307127232	5.12	6	840	8.83827	pneumococcal histidine triad protein B [Streptococcus pneumoniae 670-6B]
	Sequence	# Proteins	# Protein Groups	Activation Type	Modifications	Probability	XCorr	Δ Score	Rank	Charge	MH+ [Da]	ΔM [ppm]	First Scan	Last Scan	RT [min]	MSOrder	Ions Matched	Annotation
	NELSASELAAAEAFLSGR	14	1	CID		42.9365	3.75661	0	1	2	1835.91	-0.591904	2938	2938	63.1469	MS2	20/34
	NELSASELAAAEAFLSGR	14	1	CID		15.929	3.09247	0	1	3	1835.91	0.249141	2881	2881	62.2426	MS2	26/68
	NELSASELAAAEAFLSGR	14	1	CID		18.4419	1.98919	0	1	2	1835.92	2.09364	3119	3119	66.5094	MS2	11/34
	GYTLEDLLATVK	13	2	CID		19.5481	1.3205	0	1	2	1322.72	0.733564	2667	2667	58.3321	MS2	12/22
	FEWFDEGLYEAPK	14	2	CID		18.7062	1.16371	0	1	2	1630.75	2.57142	2409	2409	53.7724	MS2	10/24
	NELSASELAAAEAFLSGR	14	1	CID		11.7429	0.85786	0	1	2	1835.91	0.0184472	2770	2770	60.1333	MS2	8/34
gi307126614	11.48	4	427	6.49097	trigger factor [Streptococcus pneumoniae 670-6B]
	Sequence	# Proteins	# Protein Groups	Activation Type	Modifications	Probability	XCorr	Δ Score	Rank	Charge	MH+ [Da]	ΔM [ppm]	First Scan	Last Scan	RT [min]	MSOrder	Ions Matched	Annotation
	DAVEGAAIDTAVENAEIVELPEEmIHEEVHR	9	1	CID	M24(Oxidation)	34.9431	2.72449	0	1	4	3431.62	-2.40766	2545	2545	56.1837	MS2	27/180
	EEAYKDAVEGAAIDTAVENAEIVELPEEmIHEEVHR	8	1	CID	M29(Oxidation)	13.8531	2.46169	0	1	5	4051.91	-0.438337	2648	2648	58.0178	MS2	39/280
	DAVEGAAIDTAVENAEIVELPEEmIHEEVHR	9	1	CID	M24(Oxidation)	36.9217	2.1473	0	1	3	3431.62	-2.69939	2547	2547	56.2132	MS2	17/120
	DIDEEVETLADLK	9	1	CID		43.9068	1.61918	0	1	2	1489.73	-0.403272	2096	2096	48.62	MS2	13/24
gi307128212	19.4	4	335	5.47316	glyceraldehyde-3-phosphate dehydrogenase, type I [Streptococcus pneumoniae 670-6B]
	Sequence	# Proteins	# Protein Groups	Activation Type	Modifications	Probability	XCorr	Δ Score	Rank	Charge	MH+ [Da]	ΔM [ppm]	First Scan	Last Scan	RT [min]	MSOrder	Ions Matched	Annotation
	VPTPTGSVTELVAVLEK	6	1	CID		6.30798	2.54489	0	1	3	1739.98	1.53264	2784	2784	60.4256	MS2	14/64
	VVSWYDnEmSYTAQLVR	6	1	CID	N7(Deamidated) M9(Oxidation)	14.9536	1.19679	0	1	2	2077.96	8.35936	2122	2122	49.1039	MS2	11/32
	VVSWYDNEmSYTAqLVR	6	1	CID	M9(Oxidation) Q14(Deamidated)	23.9	1.08489	0.0934985	2	2	2077.96	8.35936	2122	2122	49.1039	MS2	12/32
	ALQDNFGVVEGLmTTIHAYTGDQmILDGPHR	6	1	CID	M13(Oxidation) M24(Oxidation)	44.0794	0.990871	0.124773	2	4	3431.62	-11.8451	2895	2895	62.4271	MS2	28/180
gi307127077	22.95	3	122	5.15801	50S ribosomal protein L7/L12 [Streptococcus pneumoniae 670-6B]
	Sequence	# Proteins	# Protein Groups	Activation Type	Modifications	Probability	XCorr	Δ Score	Rank	Charge	MH+ [Da]	ΔM [ppm]	First Scan	Last Scan	RT [min]	MSOrder	Ions Matched	Annotation
	AIEEEFGVTAAAPVAVAAADAADAGAAK	2	1	CID		34.5624	3.08588	0	1	3	2557.28	0.753516	2299	2299	51.9812	MS2	28/108
	AIEEEFGVTAAAPVAVAAADAADAGAAK	2	1	CID		30.5509	2.07213	0	1	3	2557.28	4.04941	2485	2485	55.0725	MS2	29/108
	AIEEEFGVTAAAPVAVAAADAADAGAAK	2	1	CID		29.1339	1.20395	0	1	2	2557.28	2.35388	2330	2330	52.462	MS2	12/54
gi307127876	4.53	4	419	4.44037	cell division protein FtsZ [Streptococcus pneumoniae 670-6B]
	Sequence	# Proteins	# Protein Groups	Activation Type	Modifications	Probability	XCorr	Δ Score	Rank	Charge	MH+ [Da]	ΔM [ppm]	First Scan	Last Scan	RT [min]	MSOrder	Ions Matched	Annotation
	FEAPISQDEDELDTPPFFK	4	1	CID		82.5937	2.34089	0	1	2	2225.03	1.98388	2554	2554	56.3319	MS2	16/36
	FEAPISQDEDELDTPPFFK	4	1	CID		27.0004	2.09948	0	1	3	2225.03	-2.36307	2489	2489	55.1297	MS2	16/72
	FEAPISQDEDELDTPPFFK	4	1	CID		43.1009	1.40558	0	1	2	2225.03	4.66942	2380	2380	53.3113	MS2	12/36
	FEAPISQDEDELDTPPFFK	4	1	CID		6.03847	1.0596	0	1	2	2225.03	0.763174	2736	2736	59.5462	MS2	8/36
gi225858795	5.9	3	305	4.36099	zinc-binding lipoprotein AdcA [Streptococcus pneumoniae 70585]
	Sequence	# Proteins	# Protein Groups	Activation Type	Modifications	Probability	XCorr	Δ Score	Rank	Charge	MH+ [Da]	ΔM [ppm]	First Scan	Last Scan	RT [min]	MSOrder	Ions Matched	Annotation
	TYLENLEENmSVLAEELK	3	1	CID	M10(Oxidation)	11.8953	2.44076	0	1	3	2141.03	-0.957323	2391	2391	53.4577	MS2	20/68
	TYLENLEENmSVLAEELK	3	1	CID	M10(Oxidation)	16.3478	1.92023	0	1	2	2141.03	-2.34769	2543	2543	56.1545	MS2	17/34
	TYLENLEENmSVLAEELK	3	1	CID	M10(Oxidation)	74.2701	0.69753	0	1	2	2141.03	-6.0098	2364	2364	53.0652	MS2	9/34
gi307126714	10.55	3	398	2.95458	phosphoglycerate kinase [Streptococcus pneumoniae 670-6B]
	Sequence	# Proteins	# Protein Groups	Activation Type	Modifications	Probability	XCorr	Δ Score	Rank	Charge	MH+ [Da]	ΔM [ppm]	First Scan	Last Scan	RT [min]	MSOrder	Ions Matched	Annotation
	GAELEAAINALEDGQVLLVENTR	4	1	CID		65.9874	2.95458	0	1	3	2425.26	1.04949	3370	3370	71.0644	MS2	28/88
	DTEGEAVSEGFLGLDIGPK	4	1	CID		3.81265	1.21644	0	1	2	1933.94	5.83052	2270	2270	51.485	MS2	11/36
	DTEGEAVSEGFLGLDIGPK	4	1	CID		6.45425	1.08151	0	1	2	1933.94	-2.7144	2455	2455	54.5553	MS2	8/36
gi307126444	16.29	1	178	2.12541	50S ribosomal protein L6 [Streptococcus pneumoniae 670-6B]
	Sequence	# Proteins	# Protein Groups	Activation Type	Modifications	Probability	XCorr	Δ Score	Rank	Charge	MH+ [Da]	ΔM [ppm]	First Scan	Last Scan	RT [min]	MSOrder	Ions Matched	Annotation
	SHPDEVEAPEGITFELPNPTTIVVSGISK	6	1	CID		30.8659	2.12541	0	1	3	3063.56	2.9176	2893	2893	62.3989	MS2	24/112
gi307127551	4.79	2	501	2.06029	pyruvate kinase [Streptococcus pneumoniae 670-6B]
	Sequence	# Proteins	# Protein Groups	Activation Type	Modifications	Probability	XCorr	Δ Score	Rank	Charge	MH+ [Da]	ΔM [ppm]	First Scan	Last Scan	RT [min]	MSOrder	Ions Matched	Annotation
	IENQQGIDNLDEIIEAADGImIAR	6	1	CID	M21(Oxidation)	15.6352	2.06029	0	1	3	2657.31	2.47715	2986	2986	64.108	MS2	19/92
	IENQQGIDNLDEIIEAADGImIAR	6	1	CID	M21(Oxidation)	31.2505	0.692171	0.214337	2	2	2657.3	-7.51917	3033	3033	64.962	MS2	7/46
gi307126945	4.77	2	398	2.02121	translation elongation factor Tu [Streptococcus pneumoniae 670-6B]
	Sequence	# Proteins	# Protein Groups	Activation Type	Modifications	Probability	XCorr	Δ Score	Rank	Charge	MH+ [Da]	ΔM [ppm]	First Scan	Last Scan	RT [min]	MSOrder	Ions Matched	Annotation
	DTDKPLLLPVEDVFSITGR	2	1	CID		45.2207	2.02121	0.0965764	2	3	2115.13	-0.962929	2936	2936	63.1196	MS2	21/72
	DTDKPLLLPVEDVFSITGR	2	1	CID		30.5025	0.863359	0	1	2	2115.14	2.95677	2963	2963	63.6386	MS2	8/36
gi307128357	9.48	2	232	2.01629	tetrahydrodipicolinate N-succinyltransferase [Streptococcus pneumoniae 670-6B]
	Sequence	# Proteins	# Protein Groups	Activation Type	Modifications	Probability	XCorr	Δ Score	Rank	Charge	MH+ [Da]	ΔM [ppm]	First Scan	Last Scan	RT [min]	MSOrder	Ions Matched	Annotation
	DVAPLLEGLVENQDYVVEQDAR	5	1	CID		24.0021	2.01629	0	1	3	2472.22	-2.39572	2755	2755	59.9028	MS2	20/84
	DVAPLLEGLVENQDYVVEQDAR	5	1	CID		11.5911	0.823849	0	1	2	2472.22	-4.15229	2757	2757	59.9319	MS2	8/42
gi307126310	8.87	1	203	1.70733	30S ribosomal protein S4 [Streptococcus pneumoniae 670-6B]
	Sequence	# Proteins	# Protein Groups	Activation Type	Modifications	Probability	XCorr	Δ Score	Rank	Charge	MH+ [Da]	ΔM [ppm]	First Scan	Last Scan	RT [min]	MSOrder	Ions Matched	Annotation
	DEINPEINEALVVEFYNK	1	1	CID		14.5987	1.70733	0	1	2	2136.05	1.19755	2573	2573	56.6082	MS2	10/34
gi307126489	3.75	2	693	0	translation elongation factor G [Streptococcus pneumoniae 670-6B]
	Sequence	# Proteins	# Protein Groups	Activation Type	Modifications	Probability	XCorr	Δ Score	Rank	Charge	MH+ [Da]	ΔM [ppm]	First Scan	Last Scan	RT [min]	MSOrder	Ions Matched	Annotation
	GINPDTDAEETRPASDEEPFAALAFK	3	1	CID		8.07328	1.80281	0	1	3	2791.32	13.7529	2262	2262	51.3604	MS2	19/100
	GINPDTDAEETRPASDEEPFAALAFK	3	1	CID		12.0731	1.27795	0	1	3	2791.31	6.24561	2076	2076	48.3233	MS2	15/100
gi307126587	4.43	1	474	0	6-phosphogluconate dehydrogenase, decarboxylating [Streptococcus pneumoniae 670-6B]
	Sequence	# Proteins	# Protein Groups	Activation Type	Modifications	Probability	XCorr	Δ Score	Rank	Charge	MH+ [Da]	ΔM [ppm]	First Scan	Last Scan	RT [min]	MSOrder	Ions Matched	Annotation
	KDDEDQDGPIVDYILDAAGNK	2	1	CID		34.3433	1.96109	0	1	3	2291.07	4.13709	2483	2483	55.0435	MS2	15/80
gi307127015	5.26	1	342	0	S-adenosylmethionine:tRNA ribosyltransferase-isomerase [Streptococcus pneumoniae 670-6B]
	Sequence	# Proteins	# Protein Groups	Activation Type	Modifications	Probability	XCorr	Δ Score	Rank	Charge	MH+ [Da]	ΔM [ppm]	First Scan	Last Scan	RT [min]	MSOrder	Ions Matched	Annotation
	DASKLLIVnRETGEmqDK	10	1	CID	N9(Deamidated) M15(Oxidation) Q16(Deamidated)	16.1386	1.56926	0	1	3	2065	-11.2438	2886	2886	62.3464	MS2	8/68
gi307127048	1.83	1	872	0	alanyl-tRNA synthetase [Streptococcus pneumoniae 670-6B]
	Sequence	# Proteins	# Protein Groups	Activation Type	Modifications	Probability	XCorr	Δ Score	Rank	Charge	MH+ [Da]	ΔM [ppm]	First Scan	Last Scan	RT [min]	MSOrder	Ions Matched	Annotation
	LSGKVYDqDGDnMSFK	4	1	CID	Q8(Deamidated) N12(Deamidated)	5.1299	0.454748	0	1	3	1805.79	4.44238	2164	2164	49.8291	MS2	8/60
gi307128055	2.61	1	268	0	nicotinamide mononucleotide transporter PnuC [Streptococcus pneumoniae 670-6B]
	Sequence	# Proteins	# Protein Groups	Activation Type	Modifications	Probability	XCorr	Δ Score	Rank	Charge	MH+ [Da]	ΔM [ppm]	First Scan	Last Scan	RT [min]	MSOrder	Ions Matched	Annotation
	MHTYLqK	2	1	CID	Q6(Deamidated)	1.56749	0.509682	0	1	1	921.458	7.81535	2636	2636	57.772	MS2	4/12
gi225857997	7.05	6	638	0	surface protein PspA [Streptococcus pneumoniae 70585]
	Sequence	# Proteins	# Protein Groups	Activation Type	Modifications	Probability	XCorr	Δ Score	Rank	Charge	MH+ [Da]	ΔM [ppm]	First Scan	Last Scan	RT [min]	MSOrder	Ions Matched	Annotation
	DVEDFKNSDGEYSALYLEAAEK	1	1	CID		19.7839	1.7043	0	1	3	2493.13	1.70397	1843	1843	43.8084	MS2	15/84
	LSKLEELSDKIDELDAEIAKLEK	1	1	CID		11.3189	1.51672	0	1	4	2629.42	4.63304	3102	3102	66.1437	MS2	24/132
	LSKLEELSDKIDELDAEIAK	1	1	CID		9.4519	1.25622	0.360515	7	4	2259.2	1.17538	2582	2582	56.7771	MS2	17/114
	LEELSDKIDELDAEIAK	1	1	CID		27.3516	1.04038	0.44025	9	3	1930.99	4.86137	2004	2004	47.0532	MS2	18/64
	DVEDFKNSDGEYSALYLEAAEK	1	1	CID		11.9475	0.984839	0.376522	5	3	2493.13	2.25328	1996	1996	46.9056	MS2	17/84
	LEELSDKIDELDAEIAK	1	1	CID		4.42728	0.661798	0.457203	2	2	1930.98	-1.10663	2031	2031	47.4994	MS2	5/32
gi225859021	4.38	1	365	0	NisK [Streptococcus pneumoniae 70585]
	Sequence	# Proteins	# Protein Groups	Activation Type	Modifications	Probability	XCorr	Δ Score	Rank	Charge	MH+ [Da]	ΔM [ppm]	First Scan	Last Scan	RT [min]	MSOrder	Ions Matched	Annotation
	VSAmAHDLKTPLTVIK	1	1	CID	M4(Oxidation)	6.91778	1.79703	0.293866	2	3	1739.98	8.05764	2784	2784	60.4256	MS2	12/60
gi225859572	20.95	1	105	0	lichenan-specific phosphotransferase enzyme iia component (pts system lichenan-specific eiia component) (eiia-lic) (eiii-lic) [Streptococcus pneumoniae 70585]
	Sequence	# Proteins	# Protein Groups	Activation Type	Modifications	Probability	XCorr	Δ Score	Rank	Charge	MH+ [Da]	ΔM [ppm]	First Scan	Last Scan	RT [min]	MSOrder	Ions Matched	Annotation
	RLADAnAALLqAHKAqTEMLTR	4	1	CID	N6(Deamidated) Q11(Deamidated) Q16(Deamidated)	4.92647	1.79009	0.394131	3	3	2425.26	7.58149	3370	3370	71.0644	MS2	17/84
gi307066694	1.78	1	3035	0	PblB, putative [Streptococcus pneumoniae AP200]
	Sequence	# Proteins	# Protein Groups	Activation Type	Modifications	Probability	XCorr	Δ Score	Rank	Charge	MH+ [Da]	ΔM [ppm]	First Scan	Last Scan	RT [min]	MSOrder	Ions Matched	Annotation
	SqTTSAQTALSGDLDVLK	1	1	CID	Q2(Deamidated)	3.67715	0.864855	0.720336	3	3	1835.91	-9.62686	2881	2881	62.2426	MS2	11/68
gi307066819	10.99	2	191	0	hypothetical protein SPAP_0190 [Streptococcus pneumoniae AP200]
	Sequence	# Proteins	# Protein Groups	Activation Type	Modifications	Probability	XCorr	Δ Score	Rank	Charge	MH+ [Da]	ΔM [ppm]	First Scan	Last Scan	RT [min]	MSOrder	Ions Matched	Annotation
	KEFCIPnNKKSFVmLEGWIqK	1	1	CID	N7(Deamidated) M14(Oxidation) Q20(Deamidated)	17.1272	0.833485	0.307707	2	2	2557.28	-2.49312	2330	2330	52.462	MS2	5/40
	KEFCIPNnKKSFVmLEGWIqK	1	1	CID	N8(Deamidated) M14(Oxidation) Q20(Deamidated)	8.31599	0.799101	0.336266	3	2	2557.28	-2.49312	2330	2330	52.462	MS2	6/40
gi307067830	5.05	2	574	0	PTS system phosphoenolpyruvate-protein kinase [Streptococcus pneumoniae AP200]
	Sequence	# Proteins	# Protein Groups	Activation Type	Modifications	Probability	XCorr	Δ Score	Rank	Charge	MH+ [Da]	ΔM [ppm]	First Scan	Last Scan	RT [min]	MSOrder	Ions Matched	Annotation
	KLPNPASINEEVIVIAHDLTPSDTAQLDK	6	1	CID		7.57315	1.86078	0	1	4	3128.65	-1.39243	3084	3084	65.8419	MS2	22/168
	KLPNPASINEEVIVIAHDLTPSDTAQLDK	6	1	CID		21.73	1.46209	0	1	3	3128.65	5.27385	3092	3092	65.9767	MS2	14/112
gi307068470	10.72	1	345	0	threonine dehydrogenase-like Zn-dependent dehydrogenase [Streptococcus pneumoniae AP200]
	Sequence	# Proteins	# Protein Groups	Activation Type	Modifications	Probability	XCorr	Δ Score	Rank	Charge	MH+ [Da]	ΔM [ppm]	First Scan	Last Scan	RT [min]	MSOrder	Ions Matched	Annotation
	IPGQPSDYTEGmLQSLLTLADVmPTCYHAARVAnVqK	1	1	CID	M12(Oxidation) M23(Oxidation) N34(Deamidated) Q36(Deamidated)	7.45192	1.36311	0.358521	5	4	4051.91	-36.7974	2707	2707	59.1009	MS2	23/216
gi182683062	6.21	1	354	0	hypothetical protein SPCG_0092 [Streptococcus pneumoniae CGSP14]
	Sequence	# Proteins	# Protein Groups	Activation Type	Modifications	Probability	XCorr	Δ Score	Rank	Charge	MH+ [Da]	ΔM [ppm]	First Scan	Last Scan	RT [min]	MSOrder	Ions Matched	Annotation
	NTQLEEEVSQAEVELESQQEEK	3	1	CID		55.6264	1.69318	0	1	3	2576.19	3.19906	2228	2228	50.7857	MS2	19/84
gi225854284	7.63	1	262	0	hydrolase, alpha/beta fold family, putative [Streptococcus pneumoniae JJA]
	Sequence	# Proteins	# Protein Groups	Activation Type	Modifications	Probability	XCorr	Δ Score	Rank	Charge	MH+ [Da]	ΔM [ppm]	First Scan	Last Scan	RT [min]	MSOrder	Ions Matched	Annotation
	KVmFADFSENPYPKMEEQMR	1	1	CID	M3(Oxidation)	3.32581	1.67925	0.0146968	2	3	2493.13	7.32897	1843	1843	43.8084	MS2	12/76
gi298502340	38.96	1	77	0	hypothetical protein HMPREF0837_10838 [Streptococcus pneumoniae TCH8431/19A]
	Sequence	# Proteins	# Protein Groups	Activation Type	Modifications	Probability	XCorr	Δ Score	Rank	Charge	MH+ [Da]	ΔM [ppm]	First Scan	Last Scan	RT [min]	MSOrder	Ions Matched	Annotation
	MDTKMMSQFAVmDNEmLARIEGGDVSDIYR	1	1	CID	M12(Oxidation) M16(Oxidation)	8.04028	1.592	0.0758219	2	5	3485.55	-5.81767	2570	2570	56.5734	MS2	26/232
gi15900275	4.37	1	481	0	capsular polysaccharide biosynthesis protein Cps4A [Streptococcus pneumoniae TIGR4]
	Sequence	# Proteins	# Protein Groups	Activation Type	Modifications	Probability	XCorr	Δ Score	Rank	Charge	MH+ [Da]	ΔM [ppm]	First Scan	Last Scan	RT [min]	MSOrder	Ions Matched	Annotation
	YYPAGNVHLDSEQALGFVRER	1	1	CID		2.6748	1.82672	0	1	3	2421.2	1.40777	2355	2355	52.8905	MS2	8/80

## Sheet: 5104-8 (1)
Accession #	Coverage	# Peptides	#AAs	Score	Description
gi307127341	46.31	36	434	49.8904	phosphopyruvate hydratase [Streptococcus pneumoniae 670-6B]
	Sequence	# Proteins	# Protein Groups	Activation Type	Modifications	Probability	XCorr	Δ Score	Rank	Charge	MH+ [Da]	ΔM [ppm]	First Scan	Last Scan	RT [min]	MSOrder	Ions Matched	Annotation
	VNQIGTLTETFEAIEmAK	2	1	CID	M16(Oxidation)	79.9276	4.39689	0	1	2	2011	-1.01624	3256	3256	62.7205	MS2	22/34
	GNPTLEVEVYTESGAFGR	2	1	CID		125.181	4.10005	0	1	2	1925.92	0.820986	2146	2146	48.6913	MS2	22/34
	SGETEDSTIADIAVATNAGQIK	2	1	CID		79.861	3.57687	0	1	2	2191.07	-2.2112	1751	1751	42.9484	MS2	25/42
	TSAEQIDYLEELVNK	2	1	CID		52.7839	3.36263	0	1	2	1751.87	0.557627	2402	2402	52.0955	MS2	17/28
	VNQIGTLTETFEAIEMAK	2	1	CID		79.0242	3.29498	0	1	2	1995.01	-0.486006	3418	3418	64.6624	MS2	21/34
	GNPTLEVEVYTESGAFGR	2	1	CID		96.0936	3.2223	0	1	2	1925.92	-4.91632	2385	2385	51.8827	MS2	19/34
	AVDNVNNIIAEAIIGYDVR	2	1	CID		75.5409	3.2159	0	1	2	2059.09	6.72935	3371	3371	64.0764	MS2	20/36
	GNPTLEVEVYTESGAFGR	2	1	CID		53.3664	2.90888	0	1	2	1925.92	-4.42804	1935	1935	45.6728	MS2	16/34
	VQLVGDDFFVTNTDYLAR	2	1	CID		42.1412	2.87064	0	1	2	2073.03	1.2456	2780	2780	56.7185	MS2	19/34
	AVDNVNNIIAEAIIGYDVR	2	1	CID		37.5477	2.75139	0	1	3	2059.08	-1.0966	3300	3300	63.2589	MS2	27/72
	SGETEDSTIADIAVATNAGQIK	2	1	CID		15.2595	2.65899	0	1	3	2191.07	0.399864	1757	1757	43.0602	MS2	25/84
	AAADYLEIPLYSYLGGFNTK	2	1	CID		24.5444	2.48493	0	1	2	2206.11	-1.21495	3734	3734	68.9561	MS2	16/38
	SGETEDSTIADIAVATNAGQIK	2	1	CID		42.3355	2.40207	0	1	2	2191.07	-0.502217	1545	1545	39.9239	MS2	18/42
	VNQIGTLTETFEAIEmAK	2	1	CID	M16(Oxidation)	56.7819	1.99346	0	1	3	2011.01	0.435157	3165	3165	61.5116	MS2	23/68
	FEGTEDGVETILAAIEAAGYVPGK	2	1	CID		66.7532	1.80452	0	1	2	2437.21	-0.503076	4063	4063	73.6503	MS2	19/46
	VNQIGTLTETFEAIEmAK	2	1	CID	M16(Oxidation)	6.482	1.78888	0	1	2	2011.01	1.66931	3513	3513	65.8689	MS2	11/34
	VQLVGDDFFVTNTDYLAR	2	1	CID		56.035	1.70413	0	1	2	2073.03	-0.219248	3030	3030	59.7571	MS2	14/34
	FEGTEDGVETILAAIEAAGYVPGK	2	1	CID		8.51702	1.63237	0	1	2	2437.21	-0.014795	4298	4298	76.7375	MS2	16/46
	SGETEDSTIADIAVATNAGQIK	2	1	CID		44.5134	1.62917	0	1	3	2191.07	0.399864	1553	1553	40.0412	MS2	20/84
	FEGTEDGVETILAAIEAAGYVPGK	2	1	CID		12.1102	1.55944	0	1	3	2437.21	-4.78898	5212	5212	87.9009	MS2	12/92
	FEGTEDGVETILAAIEAAGYVPGK	2	1	CID		20.3958	1.53291	0	1	3	2437.21	-3.14103	4058	4058	73.592	MS2	18/92
	AVDNVNNIIAEAIIGYDVR	2	1	CID		29.2071	1.42479	0	1	2	2059.09	9.90317	3615	3615	67.221	MS2	12/36
	AAADYLEIPLYSYLGGFNTK	2	1	CID		5.91044	1.38494	0.190852	4	3	2206.1	-1.89978	3795	3795	69.7562	MS2	15/76
	VNQIGTLTETFEAIEMAK	2	1	CID		79.5301	1.33969	0	1	2	1995.01	-1.09636	3175	3175	61.6479	MS2	13/34
	YPIITIEDGMDENDWDGWK	2	1	CID		20.5516	1.32721	0	1	2	2297.01	2.76778	3127	3127	61.0013	MS2	13/36
	KVQLVGDDFFVTNTDYLAR	2	1	CID		22.9459	1.30432	0	1	3	2201.13	2.02631	2504	2504	53.2893	MS2	16/72
	VNQIGTLTETFEAIEmAK	2	1	CID	M16(Oxidation)	4.0268	1.30185	0	1	2	2011.01	3.98864	3801	3801	69.8441	MS2	6/34
	VNQIGTLTETFEAIEMAK	2	1	CID		21.2893	1.23076	0	1	2	1995.01	-0.486006	3650	3650	67.6743	MS2	10/34
	VNQIGTLTETFEAIEmAK	2	1	CID	M16(Oxidation)	8.2294	1.21876	0	1	3	2011.01	0.984473	3428	3428	64.8221	MS2	15/68
	SGETEDSTIADIAVATNAGQIK	2	1	CID		76.5686	1.09352	0	1	2	2191.07	-1.23464	1968	1968	46.0807	MS2	17/42
	GNPTLEVEVYTESGAFGR	2	1	CID		18.5614	1.08842	0	1	2	1925.93	1.43134	2957	2957	58.8509	MS2	8/34
	IEDQLGEVAEYR	2	1	CID		42.9257	1.03811	0	1	2	1421.69	-0.284014	164	164	8.66716	MS2	7/22
	FEGTEDGVETILAAIEAAGYVPGK	2	1	CID		11.2957	1.02532	0	1	3	2437.22	2.35213	4288	4288	76.6074	MS2	16/92
	AVDNVNNIIAEAIIGYDVR	2	1	CID		3.6717	0.83712	0	1	2	2059.1	19.1805	4000	4000	72.8659	MS2	6/36
	GLETAVGDEGGFAPR	2	1	CID		22.9994	0.650365	0	1	2	1475.71	2.30005	157	157	8.49499	MS2	9/28
	TSAEQIDYLEELVNK	2	1	CID		16.6771	0.59271	0	1	2	1751.87	3.48731	2659	2659	55.2103	MS2	7/28
gi307126729	20.59	17	607	30.35	chaperone protein DnaK [Streptococcus pneumoniae 670-6B]
	Sequence	# Proteins	# Protein Groups	Activation Type	Modifications	Probability	XCorr	Δ Score	Rank	Charge	MH+ [Da]	ΔM [ppm]	First Scan	Last Scan	RT [min]	MSOrder	Ions Matched	Annotation
	LYEQAAAAQQAQEGAEGAQATGNAGDDVVDGEFTEK	5	1	CID		140.151	8.16546	0	1	3	3639.63	-1.34295	1521	1521	39.617	MS2	52/140
	LYEQAAAAQQAQEGAEGAQATGNAGDDVVDGEFTEK	5	1	CID		101.046	3.87212	0	1	3	3639.64	3.41779	1736	1736	42.7871	MS2	43/140
	LYEQAAAAQQAQEGAEGAQATGNAGDDVVDGEFTEK	5	1	CID		68.2983	3.8139	0	1	4	3639.63	-0.440867	1558	1558	40.1123	MS2	43/210
	SVNPDEVVAMGAAIQGGVITGDVK	5	1	CID		43.6124	3.08984	0	1	2	2327.19	2.61396	2652	2652	55.1274	MS2	19/46
	SQVFSTAADNQPAVDIHVLQGERPmAADNK	5	1	CID	M25(Oxidation)	46.8719	2.64027	0	1	4	3225.56	-1.4722	1746	1746	42.9006	MS2	31/174
	SQVFSTAADNQPAVDIHVLQGERPMAADNK	5	1	CID		65.4262	2.07117	0.0741916	2	3	3209.56	-5.13994	1747	1747	42.9068	MS2	20/116
	QALSDAGLSLSEIDEVILVGGSTR	5	1	CID		32.0931	2.03301	0	1	3	2430.27	0.26586	3464	3464	65.2765	MS2	19/92
	SQVFSTAADNQPAVDIHVLQGERPMAADNK	5	1	CID		10.0142	1.91019	0	1	4	3209.57	3.45257	1716	1716	42.5024	MS2	20/174
	SVNPDEVVAMGAAIQGGVITGDVK	5	1	CID		30.309	1.90663	0	1	3	2327.19	3.02775	2824	2824	57.2451	MS2	26/92
	QALSDAGLSLSEIDEVILVGGSTR	5	1	CID		14.7855	1.82356	0	1	3	2430.27	0.448966	3692	3692	68.3059	MS2	19/92
	SQVFSTAADNQPAVDIHVLQGERPmAADNK	5	1	CID	M25(Oxidation)	2.67254	1.65307	0.0474272	2	4	3225.56	4.38718	1542	1542	39.8648	MS2	25/174
	LYEQAAAAQQAQEGAEGAQATGNAGDDVVDGEFTEK	5	1	CID		3.75901	1.37774	0.20141	6	4	3639.63	0.779836	1761	1761	43.1216	MS2	24/210
	QALSDAGLSLSEIDEVILVGGSTR	5	1	CID		28.1659	1.34739	0	1	2	2430.27	1.37794	3449	3449	65.1031	MS2	15/46
	LYEQAAAAQQAQEGAEGAQATGNAGDDVVDGEFTEK	5	1	CID		29.8758	1.12871	0	1	3	3639.64	6.71369	1348	1348	36.5883	MS2	16/140
	LYEQAAAAQQAQEGAEGAQATGNAGDDVVDGEFTEK	5	1	CID		35.6977	1.08766	0	1	3	3639.63	-4.63885	1946	1946	45.807	MS2	23/140
	SVNPDEVVAmGAAIQGGVITGDVK	5	1	CID	M10(Oxidation)	68.517	1.06535	0	1	2	2343.19	-0.601826	1872	1872	44.7967	MS2	10/46
	NGEIIVGDAAK	5	1	CID		4.02397	0.788119	0	1	2	1086.58	-0.614561	101	101	7.39012	MS2	6/20
gi307126945	14.57	14	398	23.302	translation elongation factor Tu [Streptococcus pneumoniae 670-6B]
	Sequence	# Proteins	# Protein Groups	Activation Type	Modifications	Probability	XCorr	Δ Score	Rank	Charge	MH+ [Da]	ΔM [ppm]	First Scan	Last Scan	RT [min]	MSOrder	Ions Matched	Annotation
	DTDKPLLLPVEDVFSITGR	2	1	CID		80.824	4.50803	0	1	3	2115.13	0.501915	3577	3577	66.6916	MS2	34/72
	VDLVDDEELLELVEMEIR	2	1	CID		28.8452	3.05415	0	1	3	2159.08	1.12994	4124	4124	74.3615	MS2	26/68
	VDLVDDEELLELVEmEIR	2	1	CID	M15(Oxidation)	42.4334	2.93071	0	1	3	2175.07	-4.2831	4077	4077	73.8127	MS2	20/68
	DTDKPLLLPVEDVFSITGR	2	1	CID		36.8304	2.574	0	1	3	2115.13	-0.0474016	3991	3991	72.7496	MS2	20/72
	DTDKPLLLPVEDVFSITGR	2	1	CID		26.0699	2.40877	0	1	3	2115.13	0.868126	3793	3793	69.7275	MS2	21/72
	YEDIVMELmNTVDEYIPEPER	2	1	CID	M9(Oxidation)	46.8898	2.18804	0	1	2	2601.17	0.503564	4041	4041	73.4223	MS2	13/40
	VDLVDDEELLELVEmEIR	2	1	CID	M15(Oxidation)	36.3817	2.10071	0	1	2	2175.08	2.13903	4076	4076	73.8066	MS2	17/34
	DTDKPLLLPVEDVFSITGR	2	1	CID		50.2106	1.79067	0	1	2	2115.13	-0.949482	3399	3399	64.4389	MS2	14/36
	YEDIVmELmNTVDEYIPEPER	2	1	CID	M6(Oxidation) M9(Oxidation)	41.2277	1.74697	0	1	2	2617.17	0.705752	4031	4031	73.2893	MS2	13/40
	DTDKPLLLPVEDVFSITGR	2	1	CID		58.1465	1.7175	0	1	3	2115.13	-0.413612	3340	3340	63.6922	MS2	21/72
	YEDIVmELmNTVDEYIPEPER	2	1	CID	M6(Oxidation) M9(Oxidation)	9.68566	1.69546	0	1	3	2617.17	0.570235	4045	4045	73.4604	MS2	19/80
	YEDIVmELMNTVDEYIPEPER	2	1	CID	M6(Oxidation)	28.0854	1.53708	0.297508	2	2	2601.17	0.503564	4041	4041	73.4223	MS2	11/40
	DTDKPLLLPVEDVFSITGR	2	1	CID		5.04557	1.05391	0	1	3	2115.14	3.4316	5246	5246	88.4676	MS2	16/72
	DTDKPLLLPVEDVFSITGR	2	1	CID		51.764	0.942623	0	1	2	2115.15	15.8962	3816	3816	69.9947	MS2	8/36
gi307126614	14.05	12	427	15.6467	trigger factor [Streptococcus pneumoniae 670-6B]
	Sequence	# Proteins	# Protein Groups	Activation Type	Modifications	Probability	XCorr	Δ Score	Rank	Charge	MH+ [Da]	ΔM [ppm]	First Scan	Last Scan	RT [min]	MSOrder	Ions Matched	Annotation
	DAVEGAAIDTAVENAEIVELPEEmIHEEVHR	9	1	CID	M24(Oxidation)	115.665	3.6239	0	1	4	3431.63	-0.210399	2806	2806	57.0734	MS2	42/180
	DAVEGAAIDTAVENAEIVELPEEMIHEEVHR	9	1	CID		33.0288	3.3065	0	1	3	3415.64	7.10818	3717	3717	68.6984	MS2	24/120
	DAVEGAAIDTAVENAEIVELPEEMIHEEVHR	9	1	CID		83.2339	3.1874	0	1	4	3415.63	-0.656727	3775	3775	69.5192	MS2	36/180
	DAVEGAAIDTAVENAEIVELPEEmIHEEVHR	9	1	CID	M24(Oxidation)	77.5206	2.85516	0	1	3	3431.63	5.35725	2799	2799	56.9883	MS2	31/120
	EVPALDDELAKDIDEEVETLADLK	9	1	CID		13.6497	2.67376	0	1	3	2670.32	-2.10945	4143	4143	74.545	MS2	23/92
	EEAYKDAVEGAAIDTAVENAEIVELPEEMIHEEVHR	8	1	CID		10.9721	2.64319	0.148288	3	5	4035.92	6.31748	3707	3707	68.5267	MS2	48/280
	EEAYKDAVEGAAIDTAVENAEIVELPEEmIHEEVHR	8	1	CID	M29(Oxidation)	20.335	2.17843	0.198669	3	4	4051.91	7.0214	3058	3058	60.1433	MS2	27/210
	EEAYKDAVEGAAIDTAVENAEIVELPEEMIHEEVHR	8	1	CID		22.4956	2.0767	0	1	4	4035.91	0.715695	3708	3708	68.533	MS2	32/210
	EEAYKDAVEGAAIDTAVENAEIVELPEEmIHEEVHR	8	1	CID	M29(Oxidation)	15.7743	1.94733	0	1	5	4051.9	-10.8143	2937	2937	58.5876	MS2	38/280
	EVPALDDELAKDIDEEVETLADLK	9	1	CID		30.513	1.53986	0	1	2	2670.33	3.88544	4149	4149	74.6183	MS2	14/46
	EEAYKDAVEGAAIDTAVENAEIVELPEEMIHEEVHR	8	1	CID		40.0453	1.33719	0	1	3	4035.92	2.49916	3744	3744	69.0806	MS2	24/140
	DIDEEVETLADLK	9	1	CID		21.6317	1.27148	0	1	2	1489.72	-3.5771	2184	2184	49.181	MS2	11/24
gi307126444	16.29	5	178	15.5969	50S ribosomal protein L6 [Streptococcus pneumoniae 670-6B]
	Sequence	# Proteins	# Protein Groups	Activation Type	Modifications	Probability	XCorr	Δ Score	Rank	Charge	MH+ [Da]	ΔM [ppm]	First Scan	Last Scan	RT [min]	MSOrder	Ions Matched	Annotation
	SHPDEVEAPEGITFELPNPTTIVVSGISK	6	1	CID		120.136	4.45468	0	1	3	3063.55	1.26965	3528	3528	66.0309	MS2	36/112
	SHPDEVEAPEGITFELPNPTTIVVSGISK	6	1	CID		89.5578	3.70437	0	1	3	3063.55	-2.02625	3281	3281	63.0218	MS2	28/112
	SHPDEVEAPEGITFELPNPTTIVVSGISK	6	1	CID		23.7685	3.30435	0	1	3	3063.55	-0.561405	3743	3743	69.0745	MS2	29/112
	SHPDEVEAPEGITFELPNPTTIVVSGISK	6	1	CID		9.95579	2.11584	0	1	3	3063.56	5.29797	5277	5277	89.1358	MS2	21/112
	SHPDEVEAPEGITFELPNPTTIVVSGISK	6	1	CID		25.62	2.01769	0.238388	4	3	3063.56	9.5094	3943	3943	72.0951	MS2	26/112
gi307128212	28.96	12	335	13.6123	glyceraldehyde-3-phosphate dehydrogenase, type I [Streptococcus pneumoniae 670-6B]
	Sequence	# Proteins	# Protein Groups	Activation Type	Modifications	Probability	XCorr	Δ Score	Rank	Charge	MH+ [Da]	ΔM [ppm]	First Scan	Last Scan	RT [min]	MSOrder	Ions Matched	Annotation
	AASNESYGYTEDPIVSSDIVGmSYGSLFDATQTK	6	1	CID	M22(Oxidation)	72.86	3.94598	0	1	3	3619.63	4.46654	3007	3007	59.4883	MS2	35/132
	ALQDNFGVVEGLmTTIHAYTGDQMILDGPHR	6	1	CID	M13(Oxidation)	6.19878	2.89709	0	1	4	3415.64	-1.79337	4008	4008	72.9556	MS2	29/180
	ALQDNFGVVEGLMTTIHAYTGDQMILDGPHR	6	1	CID		36.2523	2.72318	0	1	3	3399.65	6.74592	4091	4091	73.9826	MS2	25/120
	AASNESYGYTEDPIVSSDIVGMSYGSLFDATQTK	6	1	CID		9.50835	2.19425	0	1	3	3603.62	-7.33232	3376	3376	64.1483	MS2	22/132
	ALQDNFGVVEGLMTTIHAYTGDQmILDGPHR	6	1	CID	M24(Oxidation)	6.19878	2.02991	0.299329	2	4	3415.64	-1.79337	4008	4008	72.9556	MS2	28/180
	ALQDNFGVVEGLmTTIHAYTGDQMILDGPHR	6	1	CID	M13(Oxidation)	20.2548	1.95503	0	1	4	3415.64	-2.28165	3561	3561	66.5078	MS2	34/180
	VPTPTGSVTELVAVLEK	6	1	CID		22.0873	1.85183	0	1	2	1739.98	3.3161	3248	3248	62.6452	MS2	15/32
	ALQDNFGVVEGLMTTIHAYTGDQmILDGPHR	6	1	CID	M24(Oxidation)	20.551	1.50912	0	1	3	3415.64	-4.89271	4013	4013	73.0143	MS2	23/120
	ALQDNFGVVEGLMTTIHAYTGDQmILDGPHR	6	1	CID	M24(Oxidation)	28.5887	1.45731	0.254582	2	4	3415.64	-2.28165	3561	3561	66.5078	MS2	31/180
	AASNESYGYTEDPIVSSDIVGmSYGSLFDATQTK	6	1	CID	M22(Oxidation)	13.044	1.39392	0.24703	4	3	3619.64	9.22729	3238	3238	62.516	MS2	23/132
	INDLTDPVMLAHLLK	6	1	CID		5.10986	1.31422	0	1	3	1692.94	1.5325	2690	2690	55.5573	MS2	14/56
	ALQDNFGVVEGLmTTIHAYTGDQMILDGPHR	6	1	CID	M13(Oxidation)	7.10539	1.11732	0.259623	2	3	3415.64	-4.89271	4013	4013	73.0143	MS2	19/120
gi307068289	25.14	6	179	13.4423	hypothetical protein SPAP_1669 [Streptococcus pneumoniae AP200]
	Sequence	# Proteins	# Protein Groups	Activation Type	Modifications	Probability	XCorr	Δ Score	Rank	Charge	MH+ [Da]	ΔM [ppm]	First Scan	Last Scan	RT [min]	MSOrder	Ions Matched	Annotation
	FIDYFTEDEDSSLPYEK	4	1	CID		64.129	3.92323	0	1	2	2097.92	-2.2605	2408	2408	52.1585	MS2	23/32
	FIDYFTEDEDSSLPYEK	4	1	CID		72.0573	3.4524	0	1	2	2097.92	-0.307373	2181	2181	49.1465	MS2	21/32
	DEPVFTSVNSSQEPALPMNQPSQSAGTK	1	1	CID		9.72861	2.44056	0	1	3	2946.38	-0.60539	1447	1447	38.2908	MS2	16/108
	FIDYFTEDEDSSLPYEK	4	1	CID		25.4094	1.89776	0	1	2	2097.91	-9.58472	2930	2930	58.5049	MS2	12/32
	FIDYFTEDEDSSLPYEK	4	1	CID		13.9075	1.72832	0	1	2	2097.91	-3.72534	2657	2657	55.1851	MS2	12/32
	DEPVFTSVNSSQEPALPMNQPSQSAGTK	1	1	CID		5.23875	0.624459	0.19916	2	3	2946.38	1.22566	1638	1638	41.3429	MS2	12/108
gi225858695	22.36	10	501	13.169	pyruvate kinase [Streptococcus pneumoniae 70585]
	Sequence	# Proteins	# Protein Groups	Activation Type	Modifications	Probability	XCorr	Δ Score	Rank	Charge	MH+ [Da]	ΔM [ppm]	First Scan	Last Scan	RT [min]	MSOrder	Ions Matched	Annotation
	IENQQGIDNLDEIIEAADGIMIAR	6	1	CID		26.2926	2.66222	0	1	2	2641.31	0.823564	4047	4047	73.4864	MS2	14/46
	AVEAGLVESGDDIVIVAGVPVGEAVR	6	1	CID		49.2503	2.3773	0	1	3	2521.36	6.17955	2785	2785	56.8068	MS2	19/100
	AVEAGLVESGDDIVIVAGVPVGEAVR	6	1	CID		66.1529	2.08877	0	1	2	2521.35	1.61536	2787	2787	56.8327	MS2	18/50
	IENQQGIDNLDEIIEAADGImIAR	6	1	CID	M21(Oxidation)	18.186	2.04267	0	1	3	2657.31	-2.10049	3453	3453	65.1417	MS2	19/92
	IENQQGIDNLDEIIEAADGImIAR	6	1	CID	M21(Oxidation)	31.5227	1.94622	0	1	2	2657.31	-3.61292	3467	3467	65.3094	MS2	14/46
	SEVSDVFNAVIDGTDATMLSGESANGK	7	1	CID		13.1915	1.7066	0	1	3	2714.24	-5.29035	3638	3638	67.5121	MS2	17/104
	GDMGIEVPFEMVPVYQK	6	1	CID		6.09271	1.08945	0	1	2	1938.94	6.63013	2914	2914	58.3017	MS2	11/32
	YRPNADILALTFDELTER	7	1	CID		11.7677	1.06409	0.0155302	2	3	2137.09	-4.14928	3489	3489	65.582	MS2	16/68
	SEVSDVFNAVIDGTDATMLSGESANGK	7	1	CID		14.3987	0.931459	0	1	2	2714.24	-4.0562	3634	3634	67.4748	MS2	9/52
	SEVSDVFNAVIDGTDATmLSGESANGK	7	1	CID	M18(Oxidation)	17.6764	0.656206	0	1	2	2730.24	-3.36573	3013	3013	59.5521	MS2	7/52
gi307068291	8.35	10	419	12.9296	cell division GTPase [Streptococcus pneumoniae AP200]
	Sequence	# Proteins	# Protein Groups	Activation Type	Modifications	Probability	XCorr	Δ Score	Rank	Charge	MH+ [Da]	ΔM [ppm]	First Scan	Last Scan	RT [min]	MSOrder	Ions Matched	Annotation
	FEAPISQDEDELDTPPFFK	4	1	CID		130.052	4.50941	0	1	2	2225.03	0.0307519	2762	2762	56.5009	MS2	23/36
	FEAPISQDEDELDTPPFFK	4	1	CID		97.389	3.02115	0	1	2	2225.03	-1.43409	3011	3011	59.5258	MS2	19/36
	FEAPISQDEDELDTPPFFK	4	1	CID		70.6921	2.00997	0	1	2	2225.03	0.763174	3240	3240	62.5418	MS2	18/36
	FEAPISQDEDELDTPPFFK	4	1	CID		37.2597	1.76861	0	1	2	2225.03	-3.14308	2519	2519	53.493	MS2	12/36
	FEAPISQDEDELDTPPFFK	4	1	CID		42.7133	1.62049	0	1	2	2225.03	-0.213389	3711	3711	68.5671	MS2	12/36
	FEAPISQDEDELDTPPFFK	4	1	CID		10.7813	1.54718	0	1	3	2225.03	-2.17996	2852	2852	57.5448	MS2	15/72
	FEAPISQDEDELDTPPFFK	4	1	CID		37.029	1.21818	0.201889	2	2	2225.03	2.22802	3961	3961	72.3595	MS2	8/36
	FEAPISQDEDELDTPPFFK	4	1	CID		35.528	1.12175	0	1	2	2225.03	-0.457529	3486	3486	65.5493	MS2	10/36
	FEAPISQDEDELDTPPFFK	4	1	CID		43.5586	0.832044	0	1	2	2225.03	-0.945811	5241	5241	88.3761	MS2	8/36
	HFDMAETAELPKQNPR	2	1	CID		5.35797	0.663265	0.492894	3	2	1883.9	-4.68202	1683	1683	41.9817	MS2	5/30
gi307068705	31.44	6	299	11.5136	UDP-glucose pyrophosphorylase [Streptococcus pneumoniae AP200]
	Sequence	# Proteins	# Protein Groups	Activation Type	Modifications	Probability	XCorr	Δ Score	Rank	Charge	MH+ [Da]	ΔM [ppm]	First Scan	Last Scan	RT [min]	MSOrder	Ions Matched	Annotation
	DGLYSVETFVEKPAPEETPSDLAIIGR	1	1	CID		131.927	5.84346	0	1	3	2933.48	0.670548	2865	2865	57.6599	MS2	34/104
	DGLYSVETFVEKPAPEETPSDLAIIGR	1	1	CID		34.7197	3.48536	0	1	3	2933.48	5.7975	3101	3101	60.6823	MS2	26/104
	SIEDHFDSNFELEYNLK	4	1	CID		19.8434	1.86935	0	1	3	2099.96	3.79551	2182	2182	49.1526	MS2	22/64
	THASTIAVMPVPHEDVSSYGVIAPQDEGK	1	1	CID		11.8456	1.28523	0	1	3	3035.47	-4.10019	1665	1665	41.6806	MS2	15/112
	THASTIAVmPVPHEDVSSYGVIAPQDEGK	1	1	CID	M9(Oxidation)	23.7669	1.18331	0.461946	5	3	3051.47	1.10688	1335	1335	36.3807	MS2	18/112
	GKTDLLKLVDEATGMRLHFIR	1	1	CID		5.70432	0.6788	0	1	3	2413.35	10.3698	3111	3111	60.7816	MS2	8/80
gi225858121	16.02	9	693	11.0763	elongation factor G [Streptococcus pneumoniae 70585]
	Sequence	# Proteins	# Protein Groups	Activation Type	Modifications	Probability	XCorr	Δ Score	Rank	Charge	MH+ [Da]	ΔM [ppm]	First Scan	Last Scan	RT [min]	MSOrder	Ions Matched	Annotation
	GINPDTDAEEIRPASDEEPFAALAFK	1	1	CID		23.0191	3.40797	0	1	3	2803.34	-3.411	2642	2642	54.9969	MS2	27/100
	GQFGDVWIEFTPNEEGK	6	1	CID		63.004	2.85354	0	1	2	1952.9	-0.189951	2613	2613	54.6469	MS2	16/32
	VLDGAVTVLDSQSGVEPQTETVWR	6	1	CID		11.8312	2.73898	0	1	3	2586.3	-0.233788	2249	2249	50.1761	MS2	23/92
	AEIYTNDLGTDILEEDIPAEYLDQAQEYR	6	1	CID		23.4045	2.0758	0	1	3	3387.58	1.93025	3709	3709	68.539	MS2	17/112
	AEIYTNDLGTDILEEDIPAEYLDQAQEYR	6	1	CID		30.6798	1.75043	0	1	3	3387.58	0.831622	3483	3483	65.518	MS2	18/112
	GINPDTDAEEIRPASDEEPFAALAFK	1	1	CID		2.68718	1.19198	0	1	3	2803.35	3.54701	2894	2894	58.0463	MS2	15/100
	LIEAVAETDEELMMK	3	1	CID		21.748	1.01517	0	1	2	1721.84	6.18005	2036	2036	47.1358	MS2	8/28
	LIEAVAETDEELmMK	3	1	CID	M13(Oxidation)	13.9491	0.824014	0	1	2	1737.83	-0.575772	1554	1554	40.0475	MS2	7/28
	LIEAVAETDEELMmK	3	1	CID	M14(Oxidation)	23.5085	0.812062	0.0145036	2	2	1737.83	-0.575772	1554	1554	40.0475	MS2	8/28
gi307126187	5.98	6	652	8.7743	ATP-dependent metallopeptidase HflB [Streptococcus pneumoniae 670-6B]
	Sequence	# Proteins	# Protein Groups	Activation Type	Modifications	Probability	XCorr	Δ Score	Rank	Charge	MH+ [Da]	ΔM [ppm]	First Scan	Last Scan	RT [min]	MSOrder	Ions Matched	Annotation
	FSDVAGAEEEKQELVEVVEFLK	6	1	CID		21.942	3.24393	0	1	3	2495.26	1.07051	3552	3552	66.4123	MS2	24/84
	FSDVAGAEEEKQELVEVVEFLK	6	1	CID		28.4487	2.49132	0	1	3	2495.25	-0.394335	3781	3781	69.5693	MS2	26/84
	FSDVAGAEEEKQELVEVVEFLKDPK	6	1	CID		7.19948	2.07857	0.0195792	3	4	2835.43	-1.63587	3846	3846	70.4854	MS2	20/144
	FSDVAGAEEEKQELVEVVEFLK	6	1	CID		3.88763	1.11831	0.28423	3	3	2495.25	-1.49297	4016	4016	73.0468	MS2	17/84
	YETLDSTQIK	6	1	CID		6.90411	0.468637	0.328354	2	1	1197.6	-1.15848	3933	3933	71.9612	MS2	5/18
	AANK	6	1	CID		4.72912	0.401176	0	1	1	403.231	1.06729	2924	2924	58.4426	MS2	2/6
gi307127782	34.3	6	172	8.73951	DNA protection during starvation protein [Streptococcus pneumoniae 670-6B]
	Sequence	# Proteins	# Protein Groups	Activation Type	Modifications	Probability	XCorr	Δ Score	Rank	Charge	MH+ [Da]	ΔM [ppm]	First Scan	Last Scan	RT [min]	MSOrder	Ions Matched	Annotation
	GLDVTDEEGDDVTNGIFAGAK	3	1	CID		101.216	4.16339	0	1	2	2122.98	-0.52292	1850	1850	44.4764	MS2	22/40
	MDEYMEALDGQLDEISER	6	1	CID		58.6645	2.33345	0	1	2	2143.91	-2.56362	2532	2532	53.6813	MS2	13/34
	GLDVTDEEGDDVTNGIFAGAK	3	1	CID		64.4349	2.24266	0	1	2	2122.98	-1.0112	1646	1646	41.4436	MS2	17/40
	MDEYmEALDGQLDEISER	6	1	CID	M5(Oxidation)	55.6542	1.25332	0	1	2	2159.91	1.78896	1912	1912	45.3532	MS2	11/34
	TETDKTIWmLAAELGQAPGL	5	1	CID	M9(Oxidation)	31.5878	1.12548	0	1	2	2161.08	-1.85503	3627	3627	67.3865	MS2	11/38
	mDEYMEALDGQLDEISER	6	1	CID	M1(Oxidation)	55.6542	1.04186	0.168722	2	2	2159.91	1.78896	1912	1912	45.3532	MS2	11/34
gi307126804	22.87	4	293	8.7016	fructose-1,6-bisphosphate aldolase, class II [Streptococcus pneumoniae 670-6B]
	Sequence	# Proteins	# Protein Groups	Activation Type	Modifications	Probability	XCorr	Δ Score	Rank	Charge	MH+ [Da]	ΔM [ppm]	First Scan	Last Scan	RT [min]	MSOrder	Ions Matched	Annotation
	GISVEAEVGTIGGEEDGIIGK	1	1	CID		84.2991	4.05813	0	1	2	2030.03	0.535244	2162	2162	48.8823	MS2	23/40
	GISVEAEVGTIGGEEDGIIGK	1	1	CID		38.1236	2.5012	0	1	2	2030.03	-2.63858	2387	2387	51.9098	MS2	14/40
	LTEALPGFPIVLHGGSGIPDEQIQAAIK	1	1	CID		22.442	2.14227	0	1	3	2871.56	1.03492	3162	3162	61.4806	MS2	20/108
	DYEANEAEYDKKKLFDPR	1	1	CID		2.37459	0.625727	0.326441	3	3	2231.05	-10.2876	3962	3962	72.3656	MS2	14/68
gi307126714	5.78	3	398	7.41708	phosphoglycerate kinase [Streptococcus pneumoniae 670-6B]
	Sequence	# Proteins	# Protein Groups	Activation Type	Modifications	Probability	XCorr	Δ Score	Rank	Charge	MH+ [Da]	ΔM [ppm]	First Scan	Last Scan	RT [min]	MSOrder	Ions Matched	Annotation
	GAELEAAINALEDGQVLLVENTR	4	1	CID		4.4437	2.6822	0	1	3	2425.26	-0.964667	3911	3911	71.602	MS2	22/88
	GAELEAAINALEDGQVLLVENTR	4	1	CID		21.0008	2.60122	0	1	2	2425.25	-2.59917	3915	3915	71.6617	MS2	17/44
	GAELEAAINALEDGQVLLVENTR	4	1	CID		9.77551	2.13366	0	1	3	2425.26	-1.88019	4151	4151	74.6416	MS2	24/88
gi307126552	6.42	2	701	7.26781	ATP-dependent protease ATP-binding subunit ClpL [Streptococcus pneumoniae 670-6B]
	Sequence	# Proteins	# Protein Groups	Activation Type	Modifications	Probability	XCorr	Δ Score	Rank	Charge	MH+ [Da]	ΔM [ppm]	First Scan	Last Scan	RT [min]	MSOrder	Ions Matched	Annotation
	EAGNIILFFDEIHQILGAGSTGGDSGSK	11	1	CID		52.0222	4.21686	0	1	3	2833.39	-9.57904	4174	4174	74.9722	MS2	26/108
	ADPQVITLLLQVLDDGR	11	1	CID		51.1819	3.05094	0	1	2	1866.03	-0.805068	4211	4211	75.4981	MS2	19/32
gi307067830	17.42	4	574	6.90898	PTS system phosphoenolpyruvate-protein kinase [Streptococcus pneumoniae AP200]
	Sequence	# Proteins	# Protein Groups	Activation Type	Modifications	Probability	XCorr	Δ Score	Rank	Charge	MH+ [Da]	ΔM [ppm]	First Scan	Last Scan	RT [min]	MSOrder	Ions Matched	Annotation
	KLPNPASINEEVIVIAHDLTPSDTAQLDK	6	1	CID		26.0022	2.68155	0	1	3	3128.64	-6.07869	3562	3562	66.5139	MS2	21/112
	AYLLVQPDLSFETITVEDTNAEEAR	5	1	CID		30.3402	2.5703	0	1	3	2824.39	1.09543	3141	3141	61.1875	MS2	23/96
	AVGTLGEEAAQVFDAHLMVLADPEmISQIK	5	1	CID	M25(Oxidation)	4.9344	1.65908	0.0340481	2	4	3199.6	-0.0851644	4055	4055	73.56	MS2	22/174
	LDAALQASQDELSVIR	5	1	CID		47.8137	1.65712	0	1	2	1728.91	-1.07261	1572	1572	40.4058	MS2	10/30
gi307127077	22.95	6	122	6.81875	50S ribosomal protein L7/L12 [Streptococcus pneumoniae 670-6B]
	Sequence	# Proteins	# Protein Groups	Activation Type	Modifications	Probability	XCorr	Δ Score	Rank	Charge	MH+ [Da]	ΔM [ppm]	First Scan	Last Scan	RT [min]	MSOrder	Ions Matched	Annotation
	AIEEEFGVTAAAPVAVAAADAADAGAAK	2	1	CID		115.841	3.7571	0	1	3	2557.28	0.753516	2655	2655	55.1592	MS2	38/108
	AIEEEFGVTAAAPVAVAAADAADAGAAK	2	1	CID		22.3841	3.06165	0	1	3	2557.28	0.2042	2905	2905	58.1947	MS2	29/108
	AIEEEFGVTAAAPVAVAAADAADAGAAK	2	1	CID		8.91315	1.51506	0	1	3	2557.28	0.387305	3145	3145	61.2617	MS2	20/108
	AIEEEFGVTAAAPVAVAAADAADAGAAK	2	1	CID		13.1801	1.3102	0.187902	8	3	2557.27	-4.00723	3476	3476	65.4349	MS2	17/108
	AIEEEFGVTAAAPVAVAAADAADAGAAK	2	1	CID		3.12894	1.2433	0	1	2	2557.28	5.03942	2969	2969	59.0051	MS2	14/54
	AIEEEFGVTAAAPVAVAAADAADAGAAK	2	1	CID		13.697	1.22059	0	1	2	2557.28	4.06286	2688	2688	55.545	MS2	15/54
gi225858230	8.86	3	474	6.70888	6-phosphogluconate dehydrogenase [Streptococcus pneumoniae 70585]
	Sequence	# Proteins	# Protein Groups	Activation Type	Modifications	Probability	XCorr	Δ Score	Rank	Charge	MH+ [Da]	ΔM [ppm]	First Scan	Last Scan	RT [min]	MSOrder	Ions Matched	Annotation
	KDDEGQDGPIVDYILDAAGNK	5	1	CID		27.5754	2.29691	0	1	3	2233.06	0.156641	2751	2751	56.3655	MS2	23/80
	NEELANSGINFIGTGVSGGEK	7	1	CID		31.2289	2.22112	0	1	2	2093.01	-1.67425	1589	1589	40.6275	MS2	15/40
	KDDEGQDGPIVDYILDAAGNK	5	1	CID		14.1545	2.19085	0	1	2	2233.06	1.51286	2672	2672	55.3545	MS2	16/40
gi307128455	3.97	8	932	5.80646	surface protein PspC [Streptococcus pneumoniae 670-6B]
	Sequence	# Proteins	# Protein Groups	Activation Type	Modifications	Probability	XCorr	Δ Score	Rank	Charge	MH+ [Da]	ΔM [ppm]	First Scan	Last Scan	RT [min]	MSOrder	Ions Matched	Annotation
	LEELSDKIDELDAEIAK	3	1	CID		39.0335	2.03307	0	1	3	1930.99	0.283731	2272	2272	50.4537	MS2	27/64
	LEELSDKIDELDAEIAK	3	1	CID		19.3369	1.96557	0	1	2	1930.99	1.70099	2073	2073	47.6799	MS2	13/32
	LEELSDKIDELDAEIAK	3	1	CID		8.70885	1.91482	0	1	3	1930.99	0.466837	2056	2056	47.4354	MS2	19/64
	LEELSDKIDELDAEIAK	3	1	CID		16.8557	1.80781	0	1	2	1930.99	4.14239	2291	2291	50.7032	MS2	14/32
	LEELSDKIDELDAEIAK	3	1	CID		6.46398	1.57411	0	1	3	1930.98	-3.19527	3282	3282	63.0279	MS2	12/64
	LEELSDKIDELDAEIAK	3	1	CID		35.3268	1.21117	0	1	3	1930.99	-0.0824797	3050	3050	60.0059	MS2	14/64
	MLSEIqEYIKKMLSEIQLDK	1	1	CID	Q6(Deamidated)	3.92951	0.998293	0	1	3	2440.28	7.67062	3071	3071	60.2892	MS2	8/76
	MLSEIQEYIKKMLSEIqLDK	1	1	CID	Q17(Deamidated)	3.92951	0.90926	0.0891853	2	3	2440.28	7.67062	3071	3071	60.2892	MS2	10/76
gi194396990	4.54	4	551	5.72565	hypothetical protein SPG_1442 [Streptococcus pneumoniae G54]
	Sequence	# Proteins	# Protein Groups	Activation Type	Modifications	Probability	XCorr	Δ Score	Rank	Charge	MH+ [Da]	ΔM [ppm]	First Scan	Last Scan	RT [min]	MSOrder	Ions Matched	Annotation
	KAEQAGPETPTPATETVDIISDTSR	2	1	CID		49.687	3.70453	0	1	3	2614.28	-2.11059	1621	1621	41.0868	MS2	30/96
	KAEQAGPETPTPATETVDIISDTSR	2	1	CID		10.5355	2.02112	0	1	3	2614.29	2.46705	1844	1844	44.3823	MS2	17/96
	KAEQAGPETPTPATETVDIISDTSR	2	1	CID		12.3763	1.25581	0.403506	3	3	2614.28	-0.645741	1435	1435	38.0777	MS2	16/96
	AEQAGPETPTPATETVDIISDTSR	2	1	CID		57.771	1.11297	0	1	2	2486.2	5.71466	1658	1658	41.5851	MS2	10/46
gi225859717	4.67	3	1198	5.42691	DNA-directed RNA polymerase subunit beta [Streptococcus pneumoniae 70585]
	Sequence	# Proteins	# Protein Groups	Activation Type	Modifications	Probability	XCorr	Δ Score	Rank	Charge	MH+ [Da]	ΔM [ppm]	First Scan	Last Scan	RT [min]	MSOrder	Ions Matched	Annotation
	LLNQTIAEPLVDPETGEILVEAGTIMTR	8	1	CID		34.1101	2.74158	0	1	3	3023.6	5.54295	3940	3940	72.0597	MS2	26/108
	IVPVEDMPYLPDGTPVDImLNPLGVPSR	8	1	CID	M19(Oxidation)	11.9844	2.68534	0	1	3	3050.56	-2.66637	3511	3511	65.8421	MS2	20/108
	IVPVEDmPYLPDGTPVDImLNPLGVPSR	8	1	CID	M7(Oxidation) M19(Oxidation)	5.23449	1.86749	0	1	3	3066.55	-0.388984	3045	3045	59.9477	MS2	18/108
gi307066747	9.64	8	1856	5.20649	hypothetical protein SPAP_0117 [Streptococcus pneumoniae AP200]
	Sequence	# Proteins	# Protein Groups	Activation Type	Modifications	Probability	XCorr	Δ Score	Rank	Charge	MH+ [Da]	ΔM [ppm]	First Scan	Last Scan	RT [min]	MSOrder	Ions Matched	Annotation
	GTQEPEHEGEAAVEEELPALEVTTR	2	1	CID		12.6141	2.6674	0	1	3	2721.3	10.394	2034	2034	47.1248	MS2	16/96
	VNNVVSNVDVGDGYVITGDQYAAADVK	2	1	CID		34.3688	2.53909	0	1	3	2782.35	-0.35498	1916	1916	45.3946	MS2	23/104
	GESVVRPTVPEQGNPVSATTVQSAEEEVLATTNDRPEYK	2	1	CID		49.4877	2.19657	0.0384029	2	4	4185.06	-2.10618	2490	2490	53.1083	MS2	42/228
	GTQEPEHEGEAAVEEELPALEVTTR	2	1	CID		15.2141	1.91973	0	1	3	2721.29	2.1543	1822	1822	44.0717	MS2	11/96
	LYTTELLDVVPmKDDEVVTDINNKK	2	1	CID	M12(Oxidation)	4.78851	1.73347	0	1	4	2908.49	1.5753	2266	2266	50.3868	MS2	24/144
	VRPLTDEEVANLTSLNSLIDNDIINR	2	1	CID		28.7498	1.40319	0.141013	2	3	2924.53	-1.08508	3550	3550	66.3849	MS2	21/100
	TEIQNIPYTTEEIQDPTLLK	2	1	CID		2.58316	1.35217	0	1	2	2346.2	-3.188	2105	2105	48.1161	MS2	9/38
	DHYDIWYnLLDSASKEK	2	1	CID	N8(Deamidated)	2.63201	0.572117	0.712253	2	2	2097.96	-13.4991	1635	1635	41.3064	MS2	5/32
gi194398492	9.61	8	1945	5.05498	immunoglobulin A1 protease [Streptococcus pneumoniae G54]
	Sequence	# Proteins	# Protein Groups	Activation Type	Modifications	Probability	XCorr	Δ Score	Rank	Charge	MH+ [Da]	ΔM [ppm]	First Scan	Last Scan	RT [min]	MSOrder	Ions Matched	Annotation
	GEPEQVAPLPEYTRPQAGAVVEPAIQPELPEAVVTDK	1	1	CID		8.30701	2.65223	0	1	4	3925.02	1.65968	2543	2543	53.8173	MS2	26/216
	IDFQEEIQENPDLAEGTVR	9	2	CID		26.9132	2.40275	0	1	2	2203.06	11.1063	1743	1743	42.8642	MS2	16/36
	GEPAVQPELPEAVVTDKGETEVQPESPDTVVSDK	3	3	CID		9.13793	1.86015	0	1	3	3576.75	7.69287	1738	1738	42.8175	MS2	20/132
	GVPEVQPALPEAVVTDKGEPAVQPELPEAVVTDK	1	1	CID		14.7128	1.64244	0	1	3	3508.84	-0.673378	2414	2414	52.2096	MS2	20/132
	GEPAVQPELPEAVVTDKGEPEVQPELPEAVVTDK	1	1	CID		47.0582	1.59347	0	1	3	3596.82	1.11193	2347	2347	51.4575	MS2	23/132
	IDFQEEIQENPDLAEGTVR	9	2	CID		2.55491	0.901169	0	1	2	2203.07	17.6981	1960	1960	45.959	MS2	11/36
	GVPEVQPALPEAVVTDK	2	1	CID		4.36677	0.622064	0	1	2	1748.94	0.781885	1349	1349	36.5944	MS2	6/32
	QVAPLPEYTGPQASAIVEPEQVAPLPEYTGVQAGSIVEPEKVEAPK	2	2	CID		23.975	0.468839	0	1	4	4813.49	4.50788	2906	2906	58.2009	MS2	28/270
gi221231702	4.88	1	369	4.74881	glutamate 5-kinase [Streptococcus pneumoniae ATCC 700669]
	Sequence	# Proteins	# Protein Groups	Activation Type	Modifications	Probability	XCorr	Δ Score	Rank	Charge	MH+ [Da]	ΔM [ppm]	First Scan	Last Scan	RT [min]	MSOrder	Ions Matched	Annotation
	GAIPIINENDSVVIDELK	7	1	CID		55.9628	1.72142	0	1	2	1939.04	-0.583975	2496	2496	53.1861	MS2	13/34
gi225858264	8.02	1	424	4.47212	seryl-tRNA synthetase [Streptococcus pneumoniae 70585]
	Sequence	# Proteins	# Protein Groups	Activation Type	Modifications	Probability	XCorr	Δ Score	Rank	Charge	MH+ [Da]	ΔM [ppm]	First Scan	Last Scan	RT [min]	MSOrder	Ions Matched	Annotation
	TVAAILENYQNEDGSVTIPEALRPYmGGAEVIKP	7	1	CID	M26(Oxidation)	3.94793	2.04095	0	1	3	3661.84	-2.52564	3098	3098	60.6501	MS2	24/132
gi298502350	7.78	6	925	4.21643	translation initiation factor IF-2 [Streptococcus pneumoniae TCH8431/19A]
	Sequence	# Proteins	# Protein Groups	Activation Type	Modifications	Probability	XCorr	Δ Score	Rank	Charge	MH+ [Da]	ΔM [ppm]	First Scan	Last Scan	RT [min]	MSOrder	Ions Matched	Annotation
	VAGPSTPVSITGLNEAPMAGDHFAVYEDEK	9	1	CID		35.8504	2.21211	0	1	3	3102.47	-2.05713	2389	2389	51.9402	MS2	19/116
	FHELPTEFEYTDGmTVAEIAK	9	1	CID	M14(Oxidation)	26.7822	2.00433	0	1	3	2444.13	1.52416	2011	2011	46.7395	MS2	20/80
	NRSSQNQVRNQK	9	1	CID		6.02581	0.842038	0.0777282	2	2	1458.74	-8.23929	2222	2222	49.7499	MS2	6/22
	nQKNSNWNNNKK	9	1	CID	N1(Deamidated)	3.36384	0.599853	0.528224	3	2	1489.72	9.0369	2184	2184	49.181	MS2	7/22
	NqKNSNWNNNKK	9	1	CID	Q2(Deamidated)	3.36384	0.561807	0.558147	4	2	1489.72	9.0369	2184	2184	49.181	MS2	7/22
	NQKnSNWNNNKK	9	1	CID	N4(Deamidated)	3.36384	0.436108	0.657008	5	2	1489.72	9.0369	2184	2184	49.181	MS2	6/22
gi307128231	5.93	2	658	4.03401	transketolase [Streptococcus pneumoniae 670-6B]
	Sequence	# Proteins	# Protein Groups	Activation Type	Modifications	Probability	XCorr	Δ Score	Rank	Charge	MH+ [Da]	ΔM [ppm]	First Scan	Last Scan	RT [min]	MSOrder	Ions Matched	Annotation
	EAHPELAAEVEAIIDGRDPVEVTPADFPALENGFSQATR	7	1	CID		29.2475	4.03401	0	1	4	4162.04	6.04195	4068	4068	73.7057	MS2	38/228
	EAHPELAAEVEAIIDGR	7	1	CID		40.0192	1.67093	0	1	3	1819.92	-2.03324	2885	2885	57.8954	MS2	15/64
gi307128084	6.2	1	355	4.005	oligopeptide transport ATP-binding protein OppD [Streptococcus pneumoniae 670-6B]
	Sequence	# Proteins	# Protein Groups	Activation Type	Modifications	Probability	XCorr	Δ Score	Rank	Charge	MH+ [Da]	ΔM [ppm]	First Scan	Last Scan	RT [min]	MSOrder	Ions Matched	Annotation
	GVSLELVEGEVLALVGESGSGK	7	1	CID		56.1326	4.005	0	1	2	2129.13	-0.38292	4130	4130	74.4199	MS2	20/42
gi307066642	7.19	8	1169	3.25624	transcription-repair coupling factor [Streptococcus pneumoniae AP200]
	Sequence	# Proteins	# Protein Groups	Activation Type	Modifications	Probability	XCorr	Δ Score	Rank	Charge	MH+ [Da]	ΔM [ppm]	First Scan	Last Scan	RT [min]	MSOrder	Ions Matched	Annotation
	RNGnANANTRTKGnAELILQIDAYLPDTYISDQR	9	1	CID	N4(Deamidated) N14(Deamidated)	4.85395	3.25624	0.0569023	2	5	3807.87	-22.5275	2665	2665	55.2873	MS2	37/264
	RNGNAnANTRTKGnAELILQIDAYLPDTYISDQR	9	1	CID	N6(Deamidated) N14(Deamidated)	4.85395	3.12758	0.0941665	3	5	3807.87	-22.5275	2665	2665	55.2873	MS2	37/264
	RNGNANAnTRTKGnAELILQIDAYLPDTYISDQR	9	1	CID	N8(Deamidated) N14(Deamidated)	4.85395	3.12269	0.0955805	4	5	3807.87	-22.5275	2665	2665	55.2873	MS2	37/264
	RNGNANANTRTKGnAELILqIDAYLPDTYISDQR	9	1	CID	N14(Deamidated) Q20(Deamidated)	24.0998	2.97305	0.13892	7	5	3807.87	-22.5275	2665	2665	55.2873	MS2	39/264
	RNGnANAnTRTKGNAELILQIDAYLPDTYISDQR	9	1	CID	N4(Deamidated) N8(Deamidated)	10.3414	2.90747	0.157916	8	5	3807.87	-22.5275	2665	2665	55.2873	MS2	36/264
	ERFQNFAVNVDVLSR	4	1	CID		2.66467	0.954066	0	1	2	1793.92	-10.2763	3987	3987	72.6918	MS2	6/28
	SnRIAYAYLmYRPEK	9	1	CID	N2(Deamidated) M10(Oxidation)	14.5799	0.795258	0	1	2	1891.95	10.283	2801	2801	57.0006	MS2	5/28
	IYqFNQYPmQEFFNQFSFLK	9	1	CID	Q3(Deamidated) M9(Oxidation)	4.7213	0.690682	0.460388	9	3	2636.19	-23.4919	3631	3631	67.4422	MS2	8/76
gi194397634	2.71	1	737	3.10339	family 31 glycosyl hydrolase [Streptococcus pneumoniae G54]
	Sequence	# Proteins	# Protein Groups	Activation Type	Modifications	Probability	XCorr	Δ Score	Rank	Charge	MH+ [Da]	ΔM [ppm]	First Scan	Last Scan	RT [min]	MSOrder	Ions Matched	Annotation
	YWPYTSDEYLDLIDRFETEK	1	1	CID		6.00267	0.746849	0	1	2	2583.22	24.4373	3849	3849	70.5199	MS2	13/38
gi307127111	20	3	80	2.88736	50S ribosomal protein L31 [Streptococcus pneumoniae 670-6B]
	Sequence	# Proteins	# Protein Groups	Activation Type	Modifications	Probability	XCorr	Δ Score	Rank	Charge	MH+ [Da]	ΔM [ppm]	First Scan	Last Scan	RT [min]	MSOrder	Ions Matched	Annotation
	SNETVEFEGETYPLIR	2	1	CID		33.7809	2.88736	0	1	2	1883.9	-0.684443	1888	1888	44.9997	MS2	15/30
	SNETVEFEGETYPLIR	2	1	CID		7.58579	1.41582	0	1	2	1883.91	2.8556	2098	2098	48.0219	MS2	10/30
	SNETVEFEGETYPLIR	2	1	CID		32.4925	1.30794	0	1	2	1883.9	0.0479784	1683	1683	41.9817	MS2	8/30
gi307127045	8.15	1	356	2.85212	spermidine/putrescine ABC transporter spermidine/putrescine-binding protein [Streptococcus pneumoniae 670-6B]
	Sequence	# Proteins	# Protein Groups	Activation Type	Modifications	Probability	XCorr	Δ Score	Rank	Charge	MH+ [Da]	ΔM [ppm]	First Scan	Last Scan	RT [min]	MSOrder	Ions Matched	Annotation
	GYmIQNNVAIGVTFSGEASQmLEKnEnLR	5	1	CID	M3(Oxidation) M21(Oxidation) N25(Deamidated) N27(Deamidated)	20.53	0.640091	0	1	3	3247.52	-1.67889	3210	3210	62.1566	MS2	12/112
gi307127076	22.29	2	166	2.83502	50S ribosomal protein L10 [Streptococcus pneumoniae 670-6B]
	Sequence	# Proteins	# Protein Groups	Activation Type	Modifications	Probability	XCorr	Δ Score	Rank	Charge	MH+ [Da]	ΔM [ppm]	First Scan	Last Scan	RT [min]	MSOrder	Ions Matched	Annotation
	AGLEDLASVFVGPSAVAFSNEDVIAPAK	4	1	CID		11.3242	2.83502	0	1	3	2774.43	2.54102	3935	3935	71.9901	MS2	20/108
	VIKnSILRR	4	1	CID	N4(Deamidated)	9.54191	0.4768	0	1	2	1099.69	-1.98275	1344	1344	36.5314	MS2	3/16
gi307127799	7.78	1	360	2.71528	Xaa-Pro dipeptidase [Streptococcus pneumoniae 670-6B]
	Sequence	# Proteins	# Protein Groups	Activation Type	Modifications	Probability	XCorr	Δ Score	Rank	Charge	MH+ [Da]	ΔM [ppm]	First Scan	Last Scan	RT [min]	MSOrder	Ions Matched	Annotation
	DIYNLTLEAQQAALDFIKPGVTAHEVDR	6	1	CID		14.1455	2.71528	0	1	4	3127.6	-1.1122	4022	4022	73.1739	MS2	32/162
gi225861211	2.13	1	1033	2.70249	DNA polymerase III DnaE [Streptococcus pneumoniae Taiwan19F-14]
	Sequence	# Proteins	# Protein Groups	Activation Type	Modifications	Probability	XCorr	Δ Score	Rank	Charge	MH+ [Da]	ΔM [ppm]	First Scan	Last Scan	RT [min]	MSOrder	Ions Matched	Annotation
	ERYTMPDIDIDIPDIYRPDFIR	2	1	CID		2.75117	0.534499	0	1	2	2753.35	-6.15565	3036	3036	59.8399	MS2	7/42
gi169834496	3.59	2	612	2.67959	AmiA protein [Streptococcus pneumoniae Hungary19A-6]
	Sequence	# Proteins	# Protein Groups	Activation Type	Modifications	Probability	XCorr	Δ Score	Rank	Charge	MH+ [Da]	ΔM [ppm]	First Scan	Last Scan	RT [min]	MSOrder	Ions Matched	Annotation
	ALEADGVQFPIHLDVPVDQASK	9	1	CID		40.0749	2.67959	0	1	3	2349.21	0.0920516	2764	2764	56.5129	MS2	21/84
	ALEADGVQFPIHLDVPVDQASK	9	1	CID		43.652	0.975648	0	1	3	2349.21	2.65553	2517	2517	53.4666	MS2	16/84
gi221232518	9.89	4	263	2.64923	hypothetical protein SPN23F_17910 [Streptococcus pneumoniae ATCC 700669]
	Sequence	# Proteins	# Protein Groups	Activation Type	Modifications	Probability	XCorr	Δ Score	Rank	Charge	MH+ [Da]	ΔM [ppm]	First Scan	Last Scan	RT [min]	MSOrder	Ions Matched	Annotation
	SFRALIYATLLSDDANQqSIFYqRLK	1	1	CID	Q18(Deamidated) Q23(Deamidated)	5.76833	1.76229	0.466675	3	3	3063.55	-27.0134	3743	3743	69.0745	MS2	11/100
	SFRALIYATLLSDDANqQSIFYqRLK	1	1	CID	Q17(Deamidated) Q23(Deamidated)	5.76833	1.53957	0.534078	4	3	3063.55	-27.0134	3743	3743	69.0745	MS2	11/100
	SFRALIYATLLSDDANqqSIFYQRLK	1	1	CID	Q17(Deamidated) Q18(Deamidated)	12.0841	1.50627	0.593379	10	3	3063.55	-28.4782	3281	3281	63.0218	MS2	18/100
	SFRALIYATLLSDDANqqSIFYQRLK	1	1	CID	Q17(Deamidated) Q18(Deamidated)	5.76833	1.45632	0.559272	8	3	3063.55	-27.0134	3743	3743	69.0745	MS2	12/100
gi307127651	3.3	1	848	2.64194	aminopeptidase N [Streptococcus pneumoniae 670-6B]
	Sequence	# Proteins	# Protein Groups	Activation Type	Modifications	Probability	XCorr	Δ Score	Rank	Charge	MH+ [Da]	ΔM [ppm]	First Scan	Last Scan	RT [min]	MSOrder	Ions Matched	Annotation
	GLPDTLETESIEIPGYAALLAENEGALR	7	1	CID		20.0146	2.64194	0	1	3	2942.51	10.1454	3782	3782	69.5755	MS2	22/108
gi307067550	14.63	5	335	2.59909	6-phosphofructokinase [Streptococcus pneumoniae AP200]
	Sequence	# Proteins	# Protein Groups	Activation Type	Modifications	Probability	XCorr	Δ Score	Rank	Charge	MH+ [Da]	ΔM [ppm]	First Scan	Last Scan	RT [min]	MSOrder	Ions Matched	Annotation
	MVENPILGTAEEGALFSLTAEGK	6	1	CID		48.2631	2.59909	0	1	2	2377.19	-1.5519	3618	3618	67.2707	MS2	14/44
	NAGDIALWAGIATGADEIIIPEADSK	1	1	CID		38.3353	1.40837	0	1	2	2611.32	-1.36323	3741	3741	69.0459	MS2	11/50
	MVENPILGTAEEGALFSLTAEGK	6	1	CID		19.485	1.26098	0.080582	2	3	2377.19	-4.61711	3388	3388	64.3192	MS2	20/88
	MVENPILGTAEEGALFSLTAEGK	6	1	CID		7.60609	1.12669	0	1	3	2377.19	-2.05363	3624	3624	67.3528	MS2	19/88
	MVENPILGTAEEGALFSLTAEGK	6	1	CID		13.4383	1.0561	0	1	2	2377.2	1.37778	3383	3383	64.2321	MS2	9/44
gi307127841	8.96	3	647	2.59624	threonyl-tRNA synthetase [Streptococcus pneumoniae 670-6B]
	Sequence	# Proteins	# Protein Groups	Activation Type	Modifications	Probability	XCorr	Δ Score	Rank	Charge	MH+ [Da]	ΔM [ppm]	First Scan	Last Scan	RT [min]	MSOrder	Ions Matched	Annotation
	AITEDGSIEIVTPDHEDALPILR	9	1	CID		29.1148	2.59624	0	1	3	2504.28	-3.97057	2629	2629	54.8368	MS2	21/88
	AITEDGSIEIVTPDHEDALPILR	9	1	CID		23.1923	1.97778	0	1	3	2504.29	-2.87193	2358	2358	51.5672	MS2	19/88
	LFPDIHLGVGPAIEDGFYYDTDNTAGQISNEDLPR	8	1	CID		60.9572	1.12489	0.388211	7	3	3849.82	-1.91842	3642	3642	67.5663	MS2	16/136
gi307127712	4.49	1	468	2.5794	ATP synthase F1 subunit beta [Streptococcus pneumoniae 670-6B]
	Sequence	# Proteins	# Protein Groups	Activation Type	Modifications	Probability	XCorr	Δ Score	Rank	Charge	MH+ [Da]	ΔM [ppm]	First Scan	Last Scan	RT [min]	MSOrder	Ions Matched	Annotation
	YHELQDIIAILGMDELSDEEK	4	1	CID		15.3061	2.5794	0	1	3	2461.17	-6.36592	3885	3885	71.1381	MS2	19/80
gi307127215	10.64	1	141	2.57268	galactose-6-phosphate isomerase subunit LacA [Streptococcus pneumoniae 670-6B]
	Sequence	# Proteins	# Protein Groups	Activation Type	Modifications	Probability	XCorr	Δ Score	Rank	Charge	MH+ [Da]	ΔM [ppm]	First Scan	Last Scan	RT [min]	MSOrder	Ions Matched	Annotation
	MITmGAqLVGDELAK	5	1	CID	M4(Oxidation) Q7(Deamidated)	2.99978	0.638346	0.406789	3	2	1593.78	-11.2903	1669	1669	41.741	MS2	7/28
gi307128491	7.72	2	492	2.56056	inosine-5'-monophosphate dehydrogenase [Streptococcus pneumoniae 670-6B]
	Sequence	# Proteins	# Protein Groups	Activation Type	Modifications	Probability	XCorr	Δ Score	Rank	Charge	MH+ [Da]	ΔM [ppm]	First Scan	Last Scan	RT [min]	MSOrder	Ions Matched	Annotation
	FISDYNQPISNHMTSENLVTAPVGTDLATAESILQEHR	2	1	CID		25.0401	2.56056	0	1	4	4199.04	7.48194	3452	3452	65.1356	MS2	33/222
	FISDYNQPISNHmTSENLVTAPVGTDLATAESILQEHR	2	1	CID	M13(Oxidation)	21.2152	1.7153	0	1	4	4215.03	-1.59321	3203	3203	62.0749	MS2	24/222
gi307126859	3.1	2	1969	2.55065	zinc metalloprotease ZmpB [Streptococcus pneumoniae 670-6B]
	Sequence	# Proteins	# Protein Groups	Activation Type	Modifications	Probability	XCorr	Δ Score	Rank	Charge	MH+ [Da]	ΔM [ppm]	First Scan	Last Scan	RT [min]	MSOrder	Ions Matched	Annotation
	TLGLDTVLEETSAKPGEVTVVEVETPQSTTNQEQAR	8	4	CID		62.5161	2.55065	0	1	3	3856.93	-4.85728	2545	2545	53.8435	MS2	29/140
	DSSqPEDPKEDRGAEDTPKqEDTPK	1	1	CID	Q4(Deamidated) Q20(Deamidated)	3.11604	1.09552	0	1	3	2801.23	7.80995	1846	1846	44.4125	MS2	10/96
gi307067282	4.88	6	1887	2.55065	hypothetical protein SPAP_0653 [Streptococcus pneumoniae AP200]
	Sequence	# Proteins	# Protein Groups	Activation Type	Modifications	Probability	XCorr	Δ Score	Rank	Charge	MH+ [Da]	ΔM [ppm]	First Scan	Last Scan	RT [min]	MSOrder	Ions Matched	Annotation
	TLGLDTVLEETSAKPGEVTVVEVETPQSTTNQEQAR	8	4	CID		62.5161	2.55065	0	1	3	3856.93	-4.85728	2545	2545	53.8435	MS2	29/140
	GTQEEDYVGEALVPEQLPEYK	2	1	CID		4.16267	1.63237	0.0164039	2	3	2394.14	2.29781	2021	2021	46.9177	MS2	10/80
	VTEGTLVEESTTELDYK	2	1	CID		7.37807	1.06913	0	1	2	1913.92	0.462002	1405	1405	37.5538	MS2	5/32
	GTQEEDYVGEALVPEQLPEYK	2	1	CID		11.3324	0.782931	0	1	2	2394.13	-3.1819	2253	2253	50.2149	MS2	4/40
	MWGYYGYEHGFIDYVSSK	2	1	CID		3.66171	0.765748	0	1	2	2201.98	11.8822	1339	1339	36.4384	MS2	4/34
	GTQEEDYVGEALVPEQLPEYK	2	1	CID		34.1325	0.708654	0	1	2	2394.13	-1.71706	2040	2040	47.1942	MS2	11/40
gi182683590	3.94	6	1980	2.55065	zinc metalloprotease ZmpB, [Streptococcus pneumoniae CGSP14]
	Sequence	# Proteins	# Protein Groups	Activation Type	Modifications	Probability	XCorr	Δ Score	Rank	Charge	MH+ [Da]	ΔM [ppm]	First Scan	Last Scan	RT [min]	MSOrder	Ions Matched	Annotation
	TLGLDTVLEETSAKPGEVTVVEVETPQSTTNQEQAR	8	4	CID		62.5161	2.55065	0	1	3	3856.93	-4.85728	2545	2545	53.8435	MS2	29/140
	GVYASEPVKqPEVNSETKAEK	1	1	CID	Q10(Deamidated)	13.4899	1.06373	0	1	3	2291.13	-9.84205	1578	1578	40.4944	MS2	14/80
	GVYASEPVKQPEVnSETKAEK	1	1	CID	N14(Deamidated)	6.73928	0.873777	0.17857	3	3	2291.13	-9.84205	1578	1578	40.4944	MS2	15/80
	AEKVAANTDAK	1	1	CID		3.83494	0.80949	0	1	2	1117.58	-8.7439	100	100	7.38468	MS2	7/20
	NVKPDGnGKSYIK	2	1	CID	N7(Deamidated)	14.3147	0.771893	0	1	2	1420.73	-11.6344	1809	1809	43.8579	MS2	9/24
	nVKPDGNGKSYIK	2	1	CID	N1(Deamidated)	7.63981	0.689009	0.107377	2	2	1420.73	-11.6344	1809	1809	43.8579	MS2	8/24
gi169833025	3.37	3	1900	2.55065	zinc metalloprotease ZmpB [Streptococcus pneumoniae Hungary19A-6]
	Sequence	# Proteins	# Protein Groups	Activation Type	Modifications	Probability	XCorr	Δ Score	Rank	Charge	MH+ [Da]	ΔM [ppm]	First Scan	Last Scan	RT [min]	MSOrder	Ions Matched	Annotation
	TLGLDTVLEETSAKPGEVTVVEVETPQSTTNQEQAR	8	4	CID		62.5161	2.55065	0	1	3	3856.93	-4.85728	2545	2545	53.8435	MS2	29/140
	AHEnTDERRnGYIR	1	1	CID	N4(Deamidated) N10(Deamidated)	4.45835	0.847743	0.101666	2	2	1732.81	12.3681	2427	2427	52.3445	MS2	4/26
	RGTRqVAQEGVnGK	3	1	CID	Q5(Deamidated) N12(Deamidated)	4.61075	0.431771	0.309088	2	2	1501.78	3.98113	1799	1799	43.7451	MS2	4/26
gi182684635	4.59	2	980	2.51723	sialidase A precursor (neuraminidase A) [Streptococcus pneumoniae CGSP14]
	Sequence	# Proteins	# Protein Groups	Activation Type	Modifications	Probability	XCorr	Δ Score	Rank	Charge	MH+ [Da]	ΔM [ppm]	First Scan	Last Scan	RT [min]	MSOrder	Ions Matched	Annotation
	GEFAYNSLQELGNGEYGILYEHTEK	13	2	CID		23.1309	2.51723	0	1	3	2861.33	3.82512	2653	2653	55.1335	MS2	25/96
	RIFSIYDMFPEGRAVFGmPK	1	1	CID	M18(Oxidation)	2.56088	0.658858	0.376138	2	2	2377.2	13.7828	3383	3383	64.2321	MS2	4/38
gi225855121	6.16	3	942	2.51723	neuraminidase [Streptococcus pneumoniae JJA]
	Sequence	# Proteins	# Protein Groups	Activation Type	Modifications	Probability	XCorr	Δ Score	Rank	Charge	MH+ [Da]	ΔM [ppm]	First Scan	Last Scan	RT [min]	MSOrder	Ions Matched	Annotation
	GEFAYNSLQELGNGEYGILYEHTEK	13	2	CID		23.1309	2.51723	0	1	3	2861.33	3.82512	2653	2653	55.1335	MS2	25/96
	ASDPSIGSPVNIDMVLVQDPETK	10	1	CID		25.2908	1.47059	0	1	2	2412.2	2.36677	2428	2428	52.3504	MS2	11/44
	NGnPnKDGIK	1	1	CID	N3(Deamidated) N5(Deamidated)	5.50076	0.493057	0	1	1	1058.51	3.07101	2908	2908	58.2266	MS2	8/18
gi221232293	4.7	1	383	2.47845	minor capsid protein [Streptococcus pneumoniae ATCC 700669]
	Sequence	# Proteins	# Protein Groups	Activation Type	Modifications	Probability	XCorr	Δ Score	Rank	Charge	MH+ [Da]	ΔM [ppm]	First Scan	Last Scan	RT [min]	MSOrder	Ions Matched	Annotation
	HWKADSYARAIIKSTTYK	2	1	CID		5.94695	0.545874	0.0705303	2	2	2139.12	-13.47	4191	4191	75.2169	MS2	7/34
gi307067684	3.68	4	1875	2.40275	hypothetical protein SPAP_1059 [Streptococcus pneumoniae AP200]
	Sequence	# Proteins	# Protein Groups	Activation Type	Modifications	Probability	XCorr	Δ Score	Rank	Charge	MH+ [Da]	ΔM [ppm]	First Scan	Last Scan	RT [min]	MSOrder	Ions Matched	Annotation
	IDFQEEIQENPDLAEGTVR	9	2	CID		26.9132	2.40275	0	1	2	2203.06	11.1063	1743	1743	42.8642	MS2	16/36
	GEPAVQPELPEAVVTDKGETEVQPESPDTVVSDK	3	3	CID		9.13793	1.86015	0	1	3	3576.75	7.69287	1738	1738	42.8175	MS2	20/132
	IDFQEEIQENPDLAEGTVR	9	2	CID		2.55491	0.901169	0	1	2	2203.07	17.6981	1960	1960	45.959	MS2	11/36
	EYASGKYERNGYFTIK	2	1	CID		5.29269	0.666944	0.837333	2	2	1925.92	-14.399	2146	2146	48.6913	MS2	6/30
gi307127048	2.87	1	872	2.38349	alanyl-tRNA synthetase [Streptococcus pneumoniae 670-6B]
	Sequence	# Proteins	# Protein Groups	Activation Type	Modifications	Probability	XCorr	Δ Score	Rank	Charge	MH+ [Da]	ΔM [ppm]	First Scan	Last Scan	RT [min]	MSOrder	Ions Matched	Annotation
	LYDTYGFPVELTEEIAEEAGmTVDR	12	1	CID	M21(Oxidation)	29.1284	2.38349	0	1	3	2864.31	-9.26012	4089	4089	73.9587	MS2	23/96
gi225859217	27.09	4	203	2.26776	peptide deformylase [Streptococcus pneumoniae 70585]
	Sequence	# Proteins	# Protein Groups	Activation Type	Modifications	Probability	XCorr	Δ Score	Rank	Charge	MH+ [Da]	ΔM [ppm]	First Scan	Last Scan	RT [min]	MSOrder	Ions Matched	Annotation
	HSqDPVMAEKMGLRGGVGLAAPqLDISKR	3	1	CID	Q3(Deamidated) Q23(Deamidated)	3.63171	1.95201	0.473053	2	3	3063.55	-21.3782	3281	3281	63.0218	MS2	19/112
	TVAEEVTFPLSDQEIILGEK	1	1	CID		31.6608	1.32666	0	1	2	2218.15	-0.790342	2664	2664	55.2812	MS2	13/38
	MMqFLKHSQDPVmAEKMGLR	3	1	CID	Q3(Deamidated) M13(Oxidation)	10.5904	1.22385	0.262562	5	3	2394.14	-6.70319	2021	2021	46.9177	MS2	11/76
	MMQFLKHSqDPVmAEKMGLR	3	1	CID	Q9(Deamidated) M13(Oxidation)	10.5904	1.17325	0.293046	6	3	2394.14	-6.70319	2021	2021	46.9177	MS2	12/76
gi307126916	10.15	3	591	2.2347	pyruvate oxidase [Streptococcus pneumoniae 670-6B]
	Sequence	# Proteins	# Protein Groups	Activation Type	Modifications	Probability	XCorr	Δ Score	Rank	Charge	MH+ [Da]	ΔM [ppm]	First Scan	Last Scan	RT [min]	MSOrder	Ions Matched	Annotation
	IEDIDAVVAEAVK	4	1	CID		36.8625	2.2347	0	1	2	1371.74	0.192705	1795	1795	43.6863	MS2	17/24
	KGPAVVEIPVNFGFQEIDENSYYGSGSYER	4	1	CID		19.959	1.91329	0	1	3	3351.58	0.598575	2997	2997	59.3543	MS2	23/116
	mTqGKITASAAMLnVLK	4	1	CID	M1(Oxidation) Q3(Deamidated) N14(Deamidated)	4.42761	0.69842	0.435809	2	3	1794.93	-5.58735	3878	3878	71.0393	MS2	8/64
gi221230965	3.97	2	428	2.21754	adenylosuccinate synthetase [Streptococcus pneumoniae ATCC 700669]
	Sequence	# Proteins	# Protein Groups	Activation Type	Modifications	Probability	XCorr	Δ Score	Rank	Charge	MH+ [Da]	ΔM [ppm]	First Scan	Last Scan	RT [min]	MSOrder	Ions Matched	Annotation
	VGDGPFPTELFDEVGER	4	1	CID		23.8865	2.21754	0	1	2	1863.88	-0.0171388	2695	2695	55.6287	MS2	13/32
	VGDGPFPTELFDEVGER	4	1	CID		9.24401	0.500294	0	1	2	1863.88	-0.38335	2956	2956	58.8449	MS2	4/32
gi307128260	1.07	2	2426	2.20128	PblB [Streptococcus pneumoniae 670-6B]
	Sequence	# Proteins	# Protein Groups	Activation Type	Modifications	Probability	XCorr	Δ Score	Rank	Charge	MH+ [Da]	ΔM [ppm]	First Scan	Last Scan	RT [min]	MSOrder	Ions Matched	Annotation
	RGQKVKLQTYWqVnDnSGISPIFTLK	2	1	CID	Q12(Deamidated) N14(Deamidated) N16(Deamidated)	10.4895	0.817956	0.701647	2	3	3023.6	18.855	3940	3940	72.0597	MS2	14/100
	RGQKVKLqTYWQVnDnSGISPIFTLK	2	1	CID	Q8(Deamidated) N14(Deamidated) N16(Deamidated)	4.18322	0.550067	0.799361	3	3	3023.6	18.855	3940	3940	72.0597	MS2	12/100
gi307066694	1.45	8	3035	2.20128	PblB, putative [Streptococcus pneumoniae AP200]
	Sequence	# Proteins	# Protein Groups	Activation Type	Modifications	Probability	XCorr	Δ Score	Rank	Charge	MH+ [Da]	ΔM [ppm]	First Scan	Last Scan	RT [min]	MSOrder	Ions Matched	Annotation
	QGADNqISNLKTQVATNK	2	1	CID	Q6(Deamidated)	2.66856	1.37359	0.24019	3	2	1930.99	6.85639	2291	2291	50.7032	MS2	8/34
	EYEnnnAKSVEELqKWAQAK	1	1	CID	N4(Deamidated) N5(Deamidated) N6(Deamidated) Q14(Deamidated)	3.00881	1.26851	0	1	3	2383.12	21.4001	2755	2755	56.4186	MS2	14/76
	QGADNqISNLKTQVATNK	2	1	CID	Q6(Deamidated)	2.51931	1.09843	0.426355	6	3	1930.99	3.18084	2056	2056	47.4354	MS2	12/68
	EYEnnnAKSVEELQKWAqAK	1	1	CID	N4(Deamidated) N5(Deamidated) N6(Deamidated) Q18(Deamidated)	3.00881	1.086	0.143876	3	3	2383.12	21.4001	2755	2755	56.4186	MS2	12/76
	QGADNQISNLKTqVATNK	2	1	CID	Q13(Deamidated)	6.16654	1.0808	0.46839	5	3	1930.99	2.99773	2272	2272	50.4537	MS2	16/68
	QGADNQISnLKTQVATNK	2	1	CID	N9(Deamidated)	6.16654	1.01772	0.49942	6	3	1930.99	2.99773	2272	2272	50.4537	MS2	15/68
	QGADNQISNLKTQVATnK	2	1	CID	N17(Deamidated)	6.16654	0.983791	0.516107	7	3	1930.99	2.99773	2272	2272	50.4537	MS2	16/68
	ISDAIK	1	1	CID		6.8109	0.490084	0.234813	2	1	646.379	2.28221	4267	4267	76.334	MS2	4/10
gi225860790	4.41	1	454	2.18173	cobalt ABC transporter, ATPase component, CbiO [Streptococcus pneumoniae Taiwan19F-14]
	Sequence	# Proteins	# Protein Groups	Activation Type	Modifications	Probability	XCorr	Δ Score	Rank	Charge	MH+ [Da]	ΔM [ppm]	First Scan	Last Scan	RT [min]	MSOrder	Ions Matched	Annotation
	GISIIVAEHRIYYLMDIVDR	1	1	CID		4.30863	0.584436	0	1	2	2376.27	-8.10628	1985	1985	46.3338	MS2	7/38
gi307126536	15.34	1	163	2.17675	N-acetylgalactosamine-specific phosphotransferase EIIB [Streptococcus pneumoniae 670-6B]
	Sequence	# Proteins	# Protein Groups	Activation Type	Modifications	Probability	XCorr	Δ Score	Rank	Charge	MH+ [Da]	ΔM [ppm]	First Scan	Last Scan	RT [min]	MSOrder	Ions Matched	Annotation
	YLGCnTVIVAnDEVSTDKMQQTLMK	7	1	CID	N5(Deamidated) N11(Deamidated)	2.45562	1.45745	0.57234	5	3	2803.34	18.867	2642	2642	54.9969	MS2	11/96
gi307127349	11.81	4	474	2.17653	NADP-dependent glyceraldehyde-3-phosphate dehydrogenase [Streptococcus pneumoniae 670-6B]
	Sequence	# Proteins	# Protein Groups	Activation Type	Modifications	Probability	XCorr	Δ Score	Rank	Charge	MH+ [Da]	ΔM [ppm]	First Scan	Last Scan	RT [min]	MSOrder	Ions Matched	Annotation
	SSEQEITIYSPINQEELGTVPAmTQTEADEAMQAAR	8	1	CID	M23(Oxidation)	20.6095	2.17653	0	1	3	3954.83	12.0853	2754	2754	56.4126	MS2	18/140
	SSEQEITIYSPINQEELGTVPAmTQTEADEAmQAAR	8	1	CID	M23(Oxidation) M32(Oxidation)	25.658	1.89466	0	1	3	3970.81	-11.272	2333	2333	51.2895	MS2	14/140
	SSEQEITIYSPINQEELGTVPAMTQTEADEAmQAAR	8	1	CID	M32(Oxidation)	6.60925	1.41649	0.349196	2	3	3954.83	12.0853	2754	2754	56.4126	MS2	19/140
	GSGAGVqGIKYSIEAMTnVK	8	1	CID	Q7(Deamidated) N18(Deamidated)	5.86969	0.929374	0.00438408	2	2	2012.02	17.6528	2024	2024	46.9541	MS2	9/38
gi221231462	2.66	4	2144	2.14467	surface-anchored serine protease [Streptococcus pneumoniae ATCC 700669]
	Sequence	# Proteins	# Protein Groups	Activation Type	Modifications	Probability	XCorr	Δ Score	Rank	Charge	MH+ [Da]	ΔM [ppm]	First Scan	Last Scan	RT [min]	MSOrder	Ions Matched	Annotation
	ETENKEKHEDIHNAIETSK	1	1	CID		4.98453	0.717319	0	1	2	2252.07	-7.69464	3263	3263	62.7889	MS2	5/36
	LWNmInPnKK	5	1	CID	M4(Oxidation) N6(Deamidated) N8(Deamidated)	3.42438	0.686655	0	2	2	1275.65	9.4575	1630	1630	41.2152	MS2	4/18
	DGHFEILGK	11	2	CID		8.78018	0.587352	0	1	1	1015.52	0.591015	1953	1953	45.8833	MS2	3/16
	GmISYYLVDPDQDSSKYQK	8	2	CID	M2(Oxidation)	4.08877	0.507342	0	1	2	2253.02	-13.5946	2900	2900	58.1378	MS2	4/36
gi15900547	3.88	8	2140	2.14467	serine protease [Streptococcus pneumoniae TIGR4]
	Sequence	# Proteins	# Protein Groups	Activation Type	Modifications	Probability	XCorr	Δ Score	Rank	Charge	MH+ [Da]	ΔM [ppm]	First Scan	Last Scan	RT [min]	MSOrder	Ions Matched	Annotation
	QIEGISSVERAQKVQPmmNHAR	5	1	CID	M17(Oxidation) M18(Oxidation)	3.961	1.11903	0.0757845	2	3	2541.28	13.0277	4128	4128	74.3959	MS2	9/84
	LWNmInPDKK	6	1	CID	M4(Oxidation) N6(Deamidated)	3.42438	0.686655	0	1	2	1275.65	9.4535	1630	1630	41.2152	MS2	4/18
	QIEGISSVER	5	1	CID		4.67924	0.676887	0.163811	5	2	1117.58	-8.7339	100	100	7.38468	MS2	5/18
	QIEGISSVERAQKVqPmmNHARK	5	1	CID	Q15(Deamidated) M17(Oxidation) M18(Oxidation)	3.213	0.640949	0.583761	2	2	2670.33	-16.7506	4149	4149	74.6183	MS2	5/44
	QIEGISSVERAQKVQPmmnHARK	5	1	CID	M17(Oxidation) M18(Oxidation) N19(Deamidated)	8.32299	0.603329	0.608191	3	2	2670.33	-16.7506	4149	4149	74.6183	MS2	6/44
	DGHFEILGK	11	2	CID		8.78018	0.587352	0	1	1	1015.52	0.591015	1953	1953	45.8833	MS2	3/16
	GmISYYLVDPDQDSSKYQK	8	2	CID	M2(Oxidation)	4.08877	0.507342	0	1	2	2253.02	-13.5946	2900	2900	58.1378	MS2	4/36
	NPVIDNNTSNEEAKIKEEnSnK	1	1	CID	N19(Deamidated) N21(Deamidated)	3.0263	0.47835	0	1	3	2489.14	-23.061	4081	4081	73.8785	MS2	9/84
gi307066755	13.97	3	136	2.13913	glycosyltransferase [Streptococcus pneumoniae AP200]
	Sequence	# Proteins	# Protein Groups	Activation Type	Modifications	Probability	XCorr	Δ Score	Rank	Charge	MH+ [Da]	ΔM [ppm]	First Scan	Last Scan	RT [min]	MSOrder	Ions Matched	Annotation
	EGqSVNEQVMIKCIDQQLK	1	1	CID	Q3(Deamidated)	3.35913	2.13913	0.195509	2	3	2191.07	-0.466136	1757	1757	43.0602	MS2	19/72
	EGQSVnEQVMIKCIDQQLK	1	1	CID	N6(Deamidated)	3.35913	1.97756	0.256273	3	3	2191.07	-0.466136	1757	1757	43.0602	MS2	18/72
	EGQSVNEqVMIKCIDQQLK	1	1	CID	Q8(Deamidated)	3.35913	1.90046	0.285268	4	3	2191.07	-0.466136	1757	1757	43.0602	MS2	17/72
gi307128357	9.91	1	232	2.1086	tetrahydrodipicolinate N-succinyltransferase [Streptococcus pneumoniae 670-6B]
	Sequence	# Proteins	# Protein Groups	Activation Type	Modifications	Probability	XCorr	Δ Score	Rank	Charge	MH+ [Da]	ΔM [ppm]	First Scan	Last Scan	RT [min]	MSOrder	Ions Matched	Annotation
	NSHVGAGAVLAGVIEPASAEPVR	4	1	CID		17.2602	2.1086	0	1	3	2201.17	0.144356	1613	1613	41.0046	MS2	19/88
gi307128478	11.97	1	259	2.08233	30S ribosomal protein S2 [Streptococcus pneumoniae 670-6B]
	Sequence	# Proteins	# Protein Groups	Activation Type	Modifications	Probability	XCorr	Δ Score	Rank	Charge	MH+ [Da]	ΔM [ppm]	First Scan	Last Scan	RT [min]	MSOrder	Ions Matched	Annotation
	KLGIPVVAmVDTNTDPDDIDVIIPANDDAIR	6	1	CID	M9(Oxidation)	3.24902	2.08233	0	1	3	3321.69	-1.83767	2862	2862	57.6293	MS2	21/120
gi169833022	3.71	2	700	2.04164	surface protein PspC [Streptococcus pneumoniae Hungary19A-6]
	Sequence	# Proteins	# Protein Groups	Activation Type	Modifications	Probability	XCorr	Δ Score	Rank	Charge	MH+ [Da]	ΔM [ppm]	First Scan	Last Scan	RT [min]	MSOrder	Ions Matched	Annotation
	TLELEIAESDVEVK	6	2	CID		42.4641	2.04164	0	1	2	1574.81	-2.02886	1653	1653	41.5384	MS2	14/26
	ILSEIqTQLDRK	1	1	CID	Q6(Deamidated)	6.61214	0.560661	0.314296	4	2	1444.79	-12.5138	1893	1893	45.0653	MS2	4/22
gi225857758	5.18	2	579	2.04164	SigA binding protein [Streptococcus pneumoniae P1031]
	Sequence	# Proteins	# Protein Groups	Activation Type	Modifications	Probability	XCorr	Δ Score	Rank	Charge	MH+ [Da]	ΔM [ppm]	First Scan	Last Scan	RT [min]	MSOrder	Ions Matched	Annotation
	TLELEIAESDVEVK	6	2	CID		42.4641	2.04164	0	1	2	1574.81	-2.02886	1653	1653	41.5384	MS2	14/26
	SqTEqGEInIERDKAK	1	1	CID	Q2(Deamidated) Q5(Deamidated) N9(Deamidated)	2.16244	0.625232	0	1	2	1848.9	17.8427	2944	2944	58.7028	MS2	6/30
gi307128472	29.12	6	182	2.03677	ribosome-associated factor Y [Streptococcus pneumoniae 670-6B]
	Sequence	# Proteins	# Protein Groups	Activation Type	Modifications	Probability	XCorr	Δ Score	Rank	Charge	MH+ [Da]	ΔM [ppm]	First Scan	Last Scan	RT [min]	MSOrder	Ions Matched	Annotation
	VATGQLFTDALVEDSNVVQSK	2	1	CID		45.0875	2.03677	0	1	2	2221.14	1.26263	2310	2310	51.0017	MS2	15/40
	VATGQLFTDALVEDSNVVQSK	2	1	CID		32.1516	1.80017	0	1	3	2221.14	0.455723	2342	2342	51.3996	MS2	29/80
	VATGQLFTDALVEDSNVVQSK	2	1	CID		26.451	1.67325	0	1	3	2221.14	1.00504	2592	2592	54.415	MS2	21/80
	AEDVSQDmYGSIDLVTDKIER	2	1	CID	M8(Oxidation)	8.26835	1.39539	0	1	3	2400.13	1.40785	1580	1580	40.5243	MS2	10/80
	GENLEVTEAIR	2	1	CID		17.2731	1.15333	0	1	2	1230.63	-0.759834	143	143	8.18129	MS2	5/20
	AEDVSQDMYGSIDLVTDK	2	1	CID		12.4091	0.493967	0	1	2	1985.9	-1.09343	1952	1952	45.8771	MS2	9/34
gi307128262	3.62	2	1217	2.0221	TMP repeat family [Streptococcus pneumoniae 670-6B]
	Sequence	# Proteins	# Protein Groups	Activation Type	Modifications	Probability	XCorr	Δ Score	Rank	Charge	MH+ [Da]	ΔM [ppm]	First Scan	Last Scan	RT [min]	MSOrder	Ions Matched	Annotation
	SGLLGnTEAIEDLGINVNVAMIESTEAFKK	1	1	CID	N6(Deamidated)	8.01858	2.0221	0.0731696	4	3	3164.58	-25.9416	4120	4120	74.3105	MS2	23/116
	EVEnQVKGTSDQVK	1	1	CID	N4(Deamidated)	2.42616	0.658833	0	1	2	1561.77	2.88573	1641	1641	41.3794	MS2	4/26
gi307126494	12.11	2	413	2.00327	aminopeptidase PepS [Streptococcus pneumoniae 670-6B]
	Sequence	# Proteins	# Protein Groups	Activation Type	Modifications	Probability	XCorr	Δ Score	Rank	Charge	MH+ [Da]	ΔM [ppm]	First Scan	Last Scan	RT [min]	MSOrder	Ions Matched	Annotation
	NHVWESAGAVNAQGEEFLPNmPTEEVFTAPDFR	5	1	CID	M21(Oxidation)	72.2282	2.00327	0	1	3	3705.69	-6.11631	2745	2745	56.2888	MS2	22/128
	DGqIVDITAEKGDqVMK	5	1	CID	Q3(Deamidated) Q14(Deamidated)	6.82249	0.463012	0.259457	3	2	1848.9	10.4287	2944	2944	58.7028	MS2	8/32
gi225859110	4.11	1	535	2.00266	drug efflux ABC transporter, ATP-binding/permease protein [Streptococcus pneumoniae 70585]
	Sequence	# Proteins	# Protein Groups	Activation Type	Modifications	Probability	XCorr	Δ Score	Rank	Charge	MH+ [Da]	ΔM [ppm]	First Scan	Last Scan	RT [min]	MSOrder	Ions Matched	Annotation
	KMLSNSANEYSnSnAEYTHIIK	1	1	CID	N12(Deamidated) N14(Deamidated)	5.84575	0.85508	0.145376	3	2	2516.16	-5.71226	3837	3837	70.3393	MS2	6/42
gi307127069	11.92	3	428	1.98827	homoserine dehydrogenase [Streptococcus pneumoniae 670-6B]
	Sequence	# Proteins	# Protein Groups	Activation Type	Modifications	Probability	XCorr	Δ Score	Rank	Charge	MH+ [Da]	ΔM [ppm]	First Scan	Last Scan	RT [min]	MSOrder	Ions Matched	Annotation
	LGFAESDPTNDVDGIDAAYK	7	1	CID		28.5241	1.98827	0	1	2	2097.96	1.71692	1635	1635	41.3064	MS2	11/38
	GQVLKLAEIFNAqDISFK	7	1	CID	Q13(Deamidated)	2.81229	0.63216	0.581912	3	3	2022.09	2.63961	3245	3245	62.599	MS2	7/68
	AnYYFSILAPDSK	2	1	CID	N2(Deamidated)	2.77046	0.419527	0.670049	6	2	1489.72	2.3369	2184	2184	49.181	MS2	6/24
gi307126409	9.69	1	227	1.95446	hypothetical protein SP670_0261 [Streptococcus pneumoniae 670-6B]
	Sequence	# Proteins	# Protein Groups	Activation Type	Modifications	Probability	XCorr	Δ Score	Rank	Charge	MH+ [Da]	ΔM [ppm]	First Scan	Last Scan	RT [min]	MSOrder	Ions Matched	Annotation
	TDAEIQTIFEEVIPQILEEQSK	8	1	CID		44.9035	1.95446	0	1	2	2560.3	-3.11901	4155	4155	74.6748	MS2	9/42
gi307126801	4.14	1	459	1.91891	Pep export ABC ABC transporter membrane-spanning permeaseer membrane-spanning permease [Streptococcus pneumoniae 670-6B]
	Sequence	# Proteins	# Protein Groups	Activation Type	Modifications	Probability	XCorr	Δ Score	Rank	Charge	MH+ [Da]	ΔM [ppm]	First Scan	Last Scan	RT [min]	MSOrder	Ions Matched	Annotation
	INAIGDLTGYDLIETPETK	3	1	CID		10.5659	1.91891	0	1	2	2063.05	-2.82003	2398	2398	52.0371	MS2	11/36
gi307126435	7.37	1	217	1.90911	30S ribosomal protein S3 [Streptococcus pneumoniae 670-6B]
	Sequence	# Proteins	# Protein Groups	Activation Type	Modifications	Probability	XCorr	Δ Score	Rank	Charge	MH+ [Da]	ΔM [ppm]	First Scan	Last Scan	RT [min]	MSOrder	Ions Matched	Annotation
	ADIDYAWEEADTTYGK	1	1	CID		47.9503	1.90911	0	1	2	1847.8	-1.86769	1770	1770	43.2692	MS2	11/30
gi307126632	18.92	1	74	1.75476	hypothetical protein SP670_0492 [Streptococcus pneumoniae 670-6B]
	Sequence	# Proteins	# Protein Groups	Activation Type	Modifications	Probability	XCorr	Δ Score	Rank	Charge	MH+ [Da]	ΔM [ppm]	First Scan	Last Scan	RT [min]	MSOrder	Ions Matched	Annotation
	TVGDLVAYVEEQAK	1	1	CID		6.11105	1.75476	0	1	2	1521.78	-1.45753	2410	2410	52.1706	MS2	12/26
gi307126633	5.86	1	324	1.65966	putative enoyl-(acyl-carrier-protein) reductase II [Streptococcus pneumoniae 670-6B]
	Sequence	# Proteins	# Protein Groups	Activation Type	Modifications	Probability	XCorr	Δ Score	Rank	Charge	MH+ [Da]	ΔM [ppm]	First Scan	Last Scan	RT [min]	MSOrder	Ions Matched	Annotation
	QEDPDLEIFEQMGAGALAK	5	1	CID		52.167	1.65966	0	1	2	2061.98	-1.30808	2929	2929	58.4989	MS2	11/36
gi225858000	2.2	1	637	1.63242	tRNA uridine 5-carboxymethylaminomethyl modification enzyme GidA [Streptococcus pneumoniae 70585]
	Sequence	# Proteins	# Protein Groups	Activation Type	Modifications	Probability	XCorr	Δ Score	Rank	Charge	MH+ [Da]	ΔM [ppm]	First Scan	Last Scan	RT [min]	MSOrder	Ions Matched	Annotation
	NQFENEMKRLDSIK	1	1	CID		5.12203	1.63242	0.51454	2	2	1751.87	-4.17237	2402	2402	52.0955	MS2	8/26
gi221232394	45.22	6	230	1.62138	2,3-bisphosphoglycerate-dependent phosphoglycerate mutase [Streptococcus pneumoniae ATCC 700669]
	Sequence	# Proteins	# Protein Groups	Activation Type	Modifications	Probability	XCorr	Δ Score	Rank	Charge	MH+ [Da]	ΔM [ppm]	First Scan	Last Scan	RT [min]	MSOrder	Ions Matched	Annotation
	YASLDDSVIPDAENLK	2	1	CID		8.68744	1.62138	0	1	2	1749.85	-5.53089	1524	1524	39.6528	MS2	7/30
	LIKEAGIKFDQAYTSVLK	1	1	CID		3.54865	1.12678	0	1	2	2024.13	-13.7875	3345	3345	63.7497	MS2	8/34
	AEAAEQFGDEQVHIWR	2	1	CID		4.04892	1.11533	0	1	3	1885.89	3.30125	1311	1311	35.916	MS2	7/60
	TTNLALEASDQLWVPVEK	2	1	CID		22.3795	1.04213	0	1	2	2014.04	-6.71323	2422	2422	52.2865	MS2	7/34
	GLSDDEIMDVEIPNFPPLVFEFDEKLNVVSEYYLGK	2	1	CID		2.50534	0.848478	0.537677	3	3	4161.06	26.1183	2094	2094	47.965	MS2	14/140
	YASLDDSVIPDAENLK	2	1	CID		14.6005	0.523356	0	1	2	1749.85	0.0843456	1732	1732	42.7281	MS2	6/30
gi307126184	1.66	1	422	0	beta-lactamase [Streptococcus pneumoniae 670-6B]
	Sequence	# Proteins	# Protein Groups	Activation Type	Modifications	Probability	XCorr	Δ Score	Rank	Charge	MH+ [Da]	ΔM [ppm]	First Scan	Last Scan	RT [min]	MSOrder	Ions Matched	Annotation
	TmFVEGR	4	1	CID	M2(Oxidation)	8.64248	0.484851	0	1	1	855.403	-0.439435	1802	1802	43.7809	MS2	6/12
gi307126196	8.9	3	382	0	integrase [Streptococcus pneumoniae 670-6B]
	Sequence	# Proteins	# Protein Groups	Activation Type	Modifications	Probability	XCorr	Δ Score	Rank	Charge	MH+ [Da]	ΔM [ppm]	First Scan	Last Scan	RT [min]	MSOrder	Ions Matched	Annotation
	AILHLRDSRSNqTLK	2	1	CID	Q12(Deamidated)	8.37711	0.722558	0	1	3	1752.97	-6.45526	1778	1778	43.37	MS2	10/56
	AILHLRDSRSnQTLK	2	1	CID	N11(Deamidated)	8.37711	0.619017	0.143298	2	3	1752.97	-6.45526	1778	1778	43.37	MS2	10/56
	DYITINEKGGLInPnqLNR	2	1	CID	N13(Deamidated) N15(Deamidated) Q16(Deamidated)	2.12492	0.405043	0.807187	2	2	2175.08	-16.914	4076	4076	73.8066	MS2	5/36
gi307126272	9.8	5	449	0	transport protein ComB [Streptococcus pneumoniae 670-6B]
	Sequence	# Proteins	# Protein Groups	Activation Type	Modifications	Probability	XCorr	Δ Score	Rank	Charge	MH+ [Da]	ΔM [ppm]	First Scan	Last Scan	RT [min]	MSOrder	Ions Matched	Annotation
	SqHLAKVGQELTLLAqK	4	1	CID	Q2(Deamidated) Q16(Deamidated)	10.3689	1.15502	0.621422	2	2	1866.03	-0.787068	4211	4211	75.4981	MS2	10/32
	SQHLAKVGqELTLLAqK	4	1	CID	Q9(Deamidated) Q16(Deamidated)	3.74194	1.01117	0.668571	3	2	1866.03	-0.787068	4211	4211	75.4981	MS2	11/32
	SqHLAKVGqELTLLAQK	4	1	CID	Q2(Deamidated) Q9(Deamidated)	3.74194	0.879079	0.711866	4	2	1866.03	-0.787068	4211	4211	75.4981	MS2	6/32
	GDLLVqYQEGAEGVqAESYASqLDmLK	5	1	CID	Q6(Deamidated) Q15(Deamidated) Q22(Deamidated) M25(Oxidation)	6.18139	0.561472	0	1	3	2961.35	-1.419	1956	1956	45.9182	MS2	12/104
	GDLLVQYqEGAEGVqAESYASqLDmLK	5	1	CID	Q8(Deamidated) Q15(Deamidated) Q22(Deamidated) M25(Oxidation)	6.18139	0.5229	0.0686974	2	3	2961.35	-1.419	1956	1956	45.9182	MS2	13/104
gi307126335	15.93	4	182	0	transposase [Streptococcus pneumoniae 670-6B]
	Sequence	# Proteins	# Protein Groups	Activation Type	Modifications	Probability	XCorr	Δ Score	Rank	Charge	MH+ [Da]	ΔM [ppm]	First Scan	Last Scan	RT [min]	MSOrder	Ions Matched	Annotation
	EPEKFFELIEDnLK	1	1	CID	N12(Deamidated)	5.12203	1.3285	0.604922	3	2	1751.87	-3.48837	2402	2402	52.0955	MS2	9/26
	AMSRVRVQIMNqFHR	1	1	CID	Q12(Deamidated)	11.0034	0.835812	0.235014	2	2	1873.96	-0.392865	3440	3440	64.9622	MS2	4/28
	AMSRVRVQIMnQFHR	1	1	CID	N11(Deamidated)	11.0034	0.780426	0.285707	3	2	1873.96	-0.392865	3440	3440	64.9622	MS2	4/28
	AMSRVRVqIMNQFHR	1	1	CID	Q8(Deamidated)	4.40464	0.765727	0.299161	4	2	1873.96	-0.392865	3440	3440	64.9622	MS2	3/28
gi307126339	8.87	4	282	0	helix-turn-helix domain-containing protein [Streptococcus pneumoniae 670-6B]
	Sequence	# Proteins	# Protein Groups	Activation Type	Modifications	Probability	XCorr	Δ Score	Rank	Charge	MH+ [Da]	ΔM [ppm]	First Scan	Last Scan	RT [min]	MSOrder	Ions Matched	Annotation
	TEImqTYLNMRSIIGTSDLVnLFQK	5	1	CID	M4(Oxidation) Q5(Deamidated) N21(Deamidated)	7.29442	1.16912	0.46488	3	3	2933.49	24.4119	3346	3346	63.7557	MS2	13/96
	TEImQTYLnMRSIIGTSDLVnLFQK	5	1	CID	M4(Oxidation) N9(Deamidated) N21(Deamidated)	2.35706	1.05877	0.515386	5	3	2933.49	24.4119	3346	3346	63.7557	MS2	13/96
	TEImqTYLNMRSIIGTSDLVNLFqK	5	1	CID	M4(Oxidation) Q5(Deamidated) Q24(Deamidated)	7.29442	1.03529	0.526133	6	3	2933.49	24.4119	3346	3346	63.7557	MS2	13/96
	TEImQTYLNMRSIIGTSDLVnLFqK	5	1	CID	M4(Oxidation) N21(Deamidated) Q24(Deamidated)	2.35706	1.00468	0.540144	9	3	2933.49	24.4119	3346	3346	63.7557	MS2	14/96
gi307126369	4.46	1	538	0	ABC transporter ATP-binding protein [Streptococcus pneumoniae 670-6B]
	Sequence	# Proteins	# Protein Groups	Activation Type	Modifications	Probability	XCorr	Δ Score	Rank	Charge	MH+ [Da]	ΔM [ppm]	First Scan	Last Scan	RT [min]	MSOrder	Ions Matched	Annotation
	MNDIEPnEVnRDFPLYEAKNICYK	1	1	CID	N7(Deamidated) N10(Deamidated)	6.01315	0.790798	0.499695	4	3	2917.37	28.6452	1534	1534	39.744	MS2	12/92
gi307126429	19.71	2	208	0	50S ribosomal protein L3 [Streptococcus pneumoniae 670-6B]
	Sequence	# Proteins	# Protein Groups	Activation Type	Modifications	Probability	XCorr	Δ Score	Rank	Charge	MH+ [Da]	ΔM [ppm]	First Scan	Last Scan	RT [min]	MSOrder	Ions Matched	Annotation
	GPMAHGSRYHRRPGSmGPVAPnR	1	1	CID	M16(Oxidation) N22(Deamidated)	3.35782	1.58369	0	1	3	2505.21	-2.57069	3362	3362	63.9405	MS2	15/88
	TVETDGYNAIQVGFDDKR	1	1	CID		7.59187	0.768243	0.241852	5	3	2027.97	0.602149	1191	1191	33.2625	MS2	11/68
gi307126432	6.14	1	277	0	50S ribosomal protein L2 [Streptococcus pneumoniae 670-6B]
	Sequence	# Proteins	# Protein Groups	Activation Type	Modifications	Probability	XCorr	Δ Score	Rank	Charge	MH+ [Da]	ΔM [ppm]	First Scan	Last Scan	RT [min]	MSOrder	Ions Matched	Annotation
	NmTSLDFAEITTSTPEK	1	1	CID	M2(Oxidation)	26.8329	1.21879	0.0533059	3	2	1900.88	-0.333428	1340	1340	36.4445	MS2	8/32
gi307126469	6.16	3	812	0	pyruvate formate-lyase [Streptococcus pneumoniae 670-6B]
	Sequence	# Proteins	# Protein Groups	Activation Type	Modifications	Probability	XCorr	Δ Score	Rank	Charge	MH+ [Da]	ΔM [ppm]	First Scan	Last Scan	RT [min]	MSOrder	Ions Matched	Annotation
	SQSHTFSSAGSPLYqnVTIGGqTRDKK	2	1	CID	Q15(Deamidated) N16(Deamidated) Q22(Deamidated)	2.93047	1.46191	0.114988	3	3	2897.39	1.52608	3784	3784	69.6041	MS2	11/104
	FAPSFGHFKDMKnFSELENAWDK	2	1	CID	N13(Deamidated)	19.7678	1.03015	0.286825	5	3	2746.24	-16.2063	1910	1910	45.323	MS2	14/88
	FAPSFGHFKDMKNFSELEnAWDK	2	1	CID	N19(Deamidated)	6.77945	0.871181	0.39688	7	3	2746.24	-16.2063	1910	1910	45.323	MS2	15/88
gi307126491	21.84	2	87	0	addiction module antitoxin, RelB/DinJ family [Streptococcus pneumoniae 670-6B]
	Sequence	# Proteins	# Protein Groups	Activation Type	Modifications	Probability	XCorr	Δ Score	Rank	Charge	MH+ [Da]	ΔM [ppm]	First Scan	Last Scan	RT [min]	MSOrder	Ions Matched	Annotation
	QAIQYqGLPFDVRLDEnRK	2	1	CID	Q6(Deamidated) N17(Deamidated)	3.27506	0.717594	0.0833586	2	2	2292.14	-17.1603	1667	1667	41.7108	MS2	5/36
	QAIqYQGLPFDVRLDEnRK	2	1	CID	Q4(Deamidated) N17(Deamidated)	3.27506	0.660578	0.156189	4	2	2292.14	-17.1603	1667	1667	41.7108	MS2	5/36
gi307126558	7.3	1	178	0	transposase [Streptococcus pneumoniae 670-6B]
	Sequence	# Proteins	# Protein Groups	Activation Type	Modifications	Probability	XCorr	Δ Score	Rank	Charge	MH+ [Da]	ΔM [ppm]	First Scan	Last Scan	RT [min]	MSOrder	Ions Matched	Annotation
	RKKTWEEmTELER	1	1	CID	M8(Oxidation)	3.38883	0.762698	0.123311	3	3	1751.87	-0.772851	2243	2243	50.079	MS2	8/48
gi307126580	1.75	2	1770	0	endo-alpha-N-acetylgalactosaminidase [Streptococcus pneumoniae 670-6B]
	Sequence	# Proteins	# Protein Groups	Activation Type	Modifications	Probability	XCorr	Δ Score	Rank	Charge	MH+ [Da]	ΔM [ppm]	First Scan	Last Scan	RT [min]	MSOrder	Ions Matched	Annotation
	FGVFLKFKDTKnnVFVGYDK	2	1	CID	N12(Deamidated) N13(Deamidated)	7.92428	1.7112	0.0110857	2	3	2368.22	-1.35981	3622	3622	67.3256	MS2	15/76
	VAAPEPGSVnR	1	1	CID	N10(Deamidated)	5.16892	0.458646	0	1	1	1097.56	-3.57358	3163	3163	61.4868	MS2	4/20
gi307126595	2.99	1	335	0	phosphomevalonate kinase [Streptococcus pneumoniae 670-6B]
	Sequence	# Proteins	# Protein Groups	Activation Type	Modifications	Probability	XCorr	Δ Score	Rank	Charge	MH+ [Da]	ΔM [ppm]	First Scan	Last Scan	RT [min]	MSOrder	Ions Matched	Annotation
	ICGKmEREGK	1	1	CID	M5(Oxidation)	6.31611	0.657825	0	1	2	1166.57	7.08521	1547	1547	39.9534	MS2	6/18
gi307126636	22.38	3	411	0	3-oxoacyl-[acyl-carrier-protein] synthase 2 [Streptococcus pneumoniae 670-6B]
	Sequence	# Proteins	# Protein Groups	Activation Type	Modifications	Probability	XCorr	Δ Score	Rank	Charge	MH+ [Da]	ΔM [ppm]	First Scan	Last Scan	RT [min]	MSOrder	Ions Matched	Annotation
	HNFVPmTAGTSEVSDYIEANVVYGQGLEK	3	1	CID	M6(Oxidation)	22.7831	1.59109	0.0217815	2	3	3171.5	1.044	2632	2632	54.8686	MS2	24/112
	LALEEAEISPEQVAYVNAHGTSTPANEKGESGAIVAVLGK	3	1	CID		8.82863	1.35367	0.392045	6	4	4050.07	-0.730555	2551	2551	53.9064	MS2	33/234
	SFTGHLLGAAGAVEAIVTIEAMR	3	1	CID		14.8894	1.017	0	1	3	2314.22	-1.59092	4043	4043	73.4332	MS2	18/88
gi307126677	2.33	1	774	0	formate acetyltransferase [Streptococcus pneumoniae 670-6B]
	Sequence	# Proteins	# Protein Groups	Activation Type	Modifications	Probability	XCorr	Δ Score	Rank	Charge	MH+ [Da]	ΔM [ppm]	First Scan	Last Scan	RT [min]	MSOrder	Ions Matched	Annotation
	VFDIEPIRDEVLEFESVK	3	1	CID		17.421	1.68527	0	1	3	2164.12	5.61766	3479	3479	65.4663	MS2	17/68
gi307126728	18.39	1	174	0	co-chaperone GrpE [Streptococcus pneumoniae 670-6B]
	Sequence	# Proteins	# Protein Groups	Activation Type	Modifications	Probability	XCorr	Δ Score	Rank	Charge	MH+ [Da]	ΔM [ppm]	First Scan	Last Scan	RT [min]	MSOrder	Ions Matched	Annotation
	NEEVEEVQEEEVVETAEETTPEKSELDLANER	2	1	CID		54.7969	1.23549	0	1	3	3703.68	-6.1683	2277	2277	50.5135	MS2	21/124
gi307126789	2.27	1	749	0	5-methyltetrahydropteroyltriglutamate--homocysteine S-methyltransferase [Streptococcus pneumoniae 670-6B]
	Sequence	# Proteins	# Protein Groups	Activation Type	Modifications	Probability	XCorr	Δ Score	Rank	Charge	MH+ [Da]	ΔM [ppm]	First Scan	Last Scan	RT [min]	MSOrder	Ions Matched	Annotation
	ELFATERVGEnAELRAR	6	1	CID	N11(Deamidated)	3.90763	0.771302	0	1	3	1962.01	1.24588	1999	1999	46.5781	MS2	10/64
gi307126857	6.04	4	563	0	histidine kinase [Streptococcus pneumoniae 670-6B]
	Sequence	# Proteins	# Protein Groups	Activation Type	Modifications	Probability	XCorr	Δ Score	Rank	Charge	MH+ [Da]	ΔM [ppm]	First Scan	Last Scan	RT [min]	MSOrder	Ions Matched	Annotation
	VVQVTKSLATYFRLALnqGK	3	1	CID	N17(Deamidated) Q18(Deamidated)	3.98446	0.735697	0	1	2	2238.26	7.06195	3931	3931	71.9315	MS2	4/38
	VVqVTKSLATYFRLALnQGK	3	1	CID	Q3(Deamidated) N17(Deamidated)	3.98446	0.662518	0.0994692	2	2	2238.26	7.06195	3931	3931	71.9315	MS2	7/38
	VVqVTKSLATYFRLALNqGK	3	1	CID	Q3(Deamidated) Q18(Deamidated)	3.98446	0.578755	0.213325	3	2	2238.26	7.06195	3931	3931	71.9315	MS2	7/38
	SGQVISTDDSVqMK	3	1	CID	Q12(Deamidated)	5.334	0.500666	0	1	2	1495.7	2.77592	2547	2547	53.8694	MS2	6/26
gi307126900	22.49	5	378	0	L-lactate oxidase [Streptococcus pneumoniae 670-6B]
	Sequence	# Proteins	# Protein Groups	Activation Type	Modifications	Probability	XCorr	Δ Score	Rank	Charge	MH+ [Da]	ΔM [ppm]	First Scan	Last Scan	RT [min]	MSOrder	Ions Matched	Annotation
	TSNAEGHVDFINTYDLEPmAQQVIPK	5	1	CID	M19(Oxidation)	3.26726	1.51904	0	1	3	2933.38	-17.9759	2128	2128	48.4357	MS2	15/100
	QIDGGPAAFDSLQEVAEAVDR	2	1	CID		37.6262	1.2948	0	1	2	2188.05	0.0141113	3027	3027	59.7248	MS2	11/40
	NGFVFPVGMPIVEEYLPEGAGK	3	1	CID		11.6279	1.1776	0	1	2	2350.18	-0.641045	3841	3841	70.4008	MS2	7/42
	HnPYnPTFPVDPRDLK	3	1	CID	N2(Deamidated) N5(Deamidated)	8.71392	0.921352	0.25622	2	2	1911.93	10.8725	2926	2926	58.467	MS2	6/30
	TSNAEGHVDFINTYDLEPMAQQVIPK	5	1	CID		14.7283	0.423411	0	1	3	2917.4	-2.30892	2683	2683	55.4876	MS2	12/100
gi307126962	5.15	1	291	0	pyridoxine biosynthesis protein [Streptococcus pneumoniae 670-6B]
	Sequence	# Proteins	# Protein Groups	Activation Type	Modifications	Probability	XCorr	Δ Score	Rank	Charge	MH+ [Da]	ΔM [ppm]	First Scan	Last Scan	RT [min]	MSOrder	Ions Matched	Annotation
	AAGGVSRmSDPKMIK	3	1	CID	M8(Oxidation)	19.1799	0.748426	0	1	2	1563.79	-6.59272	2202	2202	49.4354	MS2	6/28
gi307127001	7.07	1	396	0	DNA modification methyltransferase M.XbaI [Streptococcus pneumoniae 670-6B]
	Sequence	# Proteins	# Protein Groups	Activation Type	Modifications	Probability	XCorr	Δ Score	Rank	Charge	MH+ [Da]	ΔM [ppm]	First Scan	Last Scan	RT [min]	MSOrder	Ions Matched	Annotation
	ILnRnYmGIDLSEEAINITQQRLENVIK	2	1	CID	N3(Deamidated) N5(Deamidated) M7(Oxidation)	3.41255	1.55034	0	1	3	3305.69	-11.2737	3307	3307	63.3412	MS2	12/108
gi307127016	17.45	1	235	0	glucosamine-6-phosphate deaminase [Streptococcus pneumoniae 670-6B]
	Sequence	# Proteins	# Protein Groups	Activation Type	Modifications	Probability	XCorr	Δ Score	Rank	Charge	MH+ [Da]	ΔM [ppm]	First Scan	Last Scan	RT [min]	MSOrder	Ions Matched	Annotation
	AEAIAGTVSGPVTENLPASSLQNHPDVTIIADAEALSLLEK	4	1	CID		25.0627	1.79249	0	1	4	4142.15	1.46695	3776	3776	69.5253	MS2	30/240
gi307127160	8.22	8	438	0	hypothetical protein SP670_1026 [Streptococcus pneumoniae 670-6B]
	Sequence	# Proteins	# Protein Groups	Activation Type	Modifications	Probability	XCorr	Δ Score	Rank	Charge	MH+ [Da]	ΔM [ppm]	First Scan	Last Scan	RT [min]	MSOrder	Ions Matched	Annotation
	IPQNASSYSAFCKMMEnSEEnFKAIIDEEVGR	1	1	CID	N17(Deamidated) N21(Deamidated)	8.76228	1.60347	0.803628	2	3	3639.63	1.63505	1521	1521	39.617	MS2	13/124
	IPQnASSYSAFCKMMEnSEENFKAIIDEEVGR	1	1	CID	N4(Deamidated) N17(Deamidated)	4.25549	1.47832	0.818954	3	3	3639.63	1.63505	1521	1521	39.617	MS2	15/124
	IPqNASSYSAFCKMMEnSEENFKAIIDEEVGR	1	1	CID	Q3(Deamidated) N17(Deamidated)	4.25549	1.45691	0.821576	4	3	3639.63	1.63505	1521	1521	39.617	MS2	15/124
	IPQnASSYSAFCKMMENSEEnFKAIIDEEVGR	1	1	CID	N4(Deamidated) N21(Deamidated)	4.25549	1.42814	0.825099	5	3	3639.63	1.63505	1521	1521	39.617	MS2	16/124
	IPqNASSYSAFCKMMENSEEnFKAIIDEEVGR	1	1	CID	Q3(Deamidated) N21(Deamidated)	4.25549	1.40673	0.827722	6	3	3639.63	1.63505	1521	1521	39.617	MS2	16/124
	IPQNASSYSAFCKMMEnSEEnFKAIIDEEVGR	1	1	CID	N17(Deamidated) N21(Deamidated)	2.95425	1.00309	0.740945	6	3	3639.64	6.39579	1736	1736	42.7871	MS2	17/124
	WSIRIPQnASSYSAFCK	1	1	CID	N8(Deamidated)	3.4489	0.546122	0.0674451	2	2	1958.96	18.1299	3979	3979	72.5776	MS2	7/32
	WSIRIPqNASSYSAFCK	1	1	CID	Q7(Deamidated)	3.4489	0.482015	0.176914	3	2	1958.96	18.1299	3979	3979	72.5776	MS2	6/32
gi307127223	44.74	4	38	0	hypothetical protein SP670_1091 [Streptococcus pneumoniae 670-6B]
	Sequence	# Proteins	# Protein Groups	Activation Type	Modifications	Probability	XCorr	Δ Score	Rank	Charge	MH+ [Da]	ΔM [ppm]	First Scan	Last Scan	RT [min]	MSOrder	Ions Matched	Annotation
	NGILSPLIqILCRFnnR	1	1	CID	Q9(Deamidated) N15(Deamidated) N16(Deamidated)	15.7767	1.80596	0	1	3	1974.03	-18.8955	3315	3315	63.4292	MS2	10/64
	nGILSPLIQILCRFnnR	1	1	CID	N1(Deamidated) N15(Deamidated) N16(Deamidated)	15.7767	1.52732	0.154292	2	3	1974.03	-18.8955	3315	3315	63.4292	MS2	11/64
	nGILSPLIqILCRFNnR	1	1	CID	N1(Deamidated) Q9(Deamidated) N16(Deamidated)	15.7767	1.18688	0.3428	4	3	1974.03	-18.8955	3315	3315	63.4292	MS2	11/64
	nGILSPLIqILCRFnNR	1	1	CID	N1(Deamidated) Q9(Deamidated) N15(Deamidated)	15.7767	1.00709	0.442352	6	3	1974.03	-18.8955	3315	3315	63.4292	MS2	11/64
gi307127245	3.65	1	356	0	tyrosine recombinase XerC [Streptococcus pneumoniae 670-6B]
	Sequence	# Proteins	# Protein Groups	Activation Type	Modifications	Probability	XCorr	Δ Score	Rank	Charge	MH+ [Da]	ΔM [ppm]	First Scan	Last Scan	RT [min]	MSOrder	Ions Matched	Annotation
	DLNLKmmVINVTR	1	1	CID	M6(Oxidation) M7(Oxidation)	2.14411	0.781352	0.0422718	2	2	1578.82	-9.54667	3258	3258	62.7325	MS2	4/24
gi307127263	7.62	2	210	0	hypothetical protein SP670_1131 [Streptococcus pneumoniae 670-6B]
	Sequence	# Proteins	# Protein Groups	Activation Type	Modifications	Probability	XCorr	Δ Score	Rank	Charge	MH+ [Da]	ΔM [ppm]	First Scan	Last Scan	RT [min]	MSOrder	Ions Matched	Annotation
	KSESDLDFAEFVVQNR	1	1	CID		7.74634	1.53741	0.467537	2	2	1883.9	-11.9344	1888	1888	44.9997	MS2	9/30
	KSESDLDFAEFVVQNR	1	1	CID		12.8665	1.19436	0.0868413	2	2	1883.9	-11.202	1683	1683	41.9817	MS2	5/30
gi307127460	24.04	1	104	0	hypothetical protein SP670_1330 [Streptococcus pneumoniae 670-6B]
	Sequence	# Proteins	# Protein Groups	Activation Type	Modifications	Probability	XCorr	Δ Score	Rank	Charge	MH+ [Da]	ΔM [ppm]	First Scan	Last Scan	RT [min]	MSOrder	Ions Matched	Annotation
	ILPTSSSRFGYAnPKDHGFSqETLK	2	1	CID	N13(Deamidated) Q21(Deamidated)	2.4466	1.53689	0.394707	6	3	2782.35	-15.597	1916	1916	45.3946	MS2	10/96
gi307127473	1.75	1	286	0	tellurite resistance protein TehB [Streptococcus pneumoniae 670-6B]
	Sequence	# Proteins	# Protein Groups	Activation Type	Modifications	Probability	XCorr	Δ Score	Rank	Charge	MH+ [Da]	ΔM [ppm]	First Scan	Last Scan	RT [min]	MSOrder	Ions Matched	Annotation
	ITVLK	4	1	CID		2.44988	0.409877	0.377863	2	1	573.4	2.48484	4780	4780	82.353	MS2	2/8
gi307127505	7.21	3	444	0	tRNA:M(5)U-54 methyltransferase [Streptococcus pneumoniae 670-6B]
	Sequence	# Proteins	# Protein Groups	Activation Type	Modifications	Probability	XCorr	Δ Score	Rank	Charge	MH+ [Da]	ΔM [ppm]	First Scan	Last Scan	RT [min]	MSOrder	Ions Matched	Annotation
	GDALTnAVGLLKEEMRR	4	1	CID	N6(Deamidated)	25.5755	1.09259	0	1	2	1873.96	-16.8329	3440	3440	64.9622	MS2	9/32
	GDALTnAVGLLKEEMRR	4	1	CID	N6(Deamidated)	22.7373	0.987949	0	1	3	1873.97	-13.7946	3522	3522	65.9661	MS2	18/64
	VFqMIPGLEnAEFVR	4	1	CID	Q3(Deamidated) N10(Deamidated)	12.802	0.785342	0.0972834	2	3	1751.87	6.43015	2243	2243	50.079	MS2	7/56
gi307127554	6.34	3	757	0	X-Pro dipeptidyl-peptidase [Streptococcus pneumoniae 670-6B]
	Sequence	# Proteins	# Protein Groups	Activation Type	Modifications	Probability	XCorr	Δ Score	Rank	Charge	MH+ [Da]	ΔM [ppm]	First Scan	Last Scan	RT [min]	MSOrder	Ions Matched	Annotation
	CRAFTDHTRQRQVK	4	1	CID		3.63083	0.833158	0	1	2	1745.91	11.7701	3392	3392	64.3564	MS2	5/26
	TYQTFNTELYQGK	4	1	CID		7.07686	0.796114	0	1	2	1592.75	-10.3144	2482	2482	53.0333	MS2	3/24
	HLFFHNGAHVYmnnWqSIDFR	4	1	CID	M12(Oxidation) N13(Deamidated) N14(Deamidated) Q16(Deamidated)	19.0608	0.726196	0	1	3	2652.2	24.6234	2352	2352	51.5026	MS2	8/80
gi307127581	6.67	1	420	0	FeS assembly protein SufD [Streptococcus pneumoniae 670-6B]
	Sequence	# Proteins	# Protein Groups	Activation Type	Modifications	Probability	XCorr	Δ Score	Rank	Charge	MH+ [Da]	ΔM [ppm]	First Scan	Last Scan	RT [min]	MSOrder	Ions Matched	Annotation
	WNLGDGTITENEPSANVPDFTALDHHLK	5	1	CID		8.11377	1.50307	0	1	4	3091.47	-3.39056	2513	2513	53.4142	MS2	23/162
gi307127615	12.29	1	236	0	purine nucleoside phosphorylase [Streptococcus pneumoniae 670-6B]
	Sequence	# Proteins	# Protein Groups	Activation Type	Modifications	Probability	XCorr	Δ Score	Rank	Charge	MH+ [Da]	ΔM [ppm]	First Scan	Last Scan	RT [min]	MSOrder	Ions Matched	Annotation
	AKFIAEnFLGDAVCFNEVRNmFGYTGTYK	1	1	CID	N7(Deamidated) M21(Oxidation)	10.2694	1.50918	0	1	3	3322.54	-15.3684	2131	2131	48.4696	MS2	12/112
gi307127637	20	1	70	0	degenerate transposase [Streptococcus pneumoniae 670-6B]
	Sequence	# Proteins	# Protein Groups	Activation Type	Modifications	Probability	XCorr	Δ Score	Rank	Charge	MH+ [Da]	ΔM [ppm]	First Scan	Last Scan	RT [min]	MSOrder	Ions Matched	Annotation
	YYSPDLKqEMIHKV	4	1	CID	Q8(Deamidated)	2.83397	0.869976	0	1	3	1751.87	6.47615	2243	2243	50.079	MS2	7/52
gi307127642	5.25	2	648	0	DNA gyrase subunit B [Streptococcus pneumoniae 670-6B]
	Sequence	# Proteins	# Protein Groups	Activation Type	Modifications	Probability	XCorr	Δ Score	Rank	Charge	MH+ [Da]	ΔM [ppm]	First Scan	Last Scan	RT [min]	MSOrder	Ions Matched	Annotation
	NLQAQDYDASQIQVLEGLEAVR	4	1	CID		20.2127	1.69831	0.0794913	2	3	2460.23	-4.09424	2681	2681	55.4614	MS2	17/84
	KSGLEISNLPGK	4	1	CID		3.99609	0.536385	0	1	2	1242.69	-10.7857	1882	1882	44.9293	MS2	6/22
gi307127756	16.48	1	182	0	NADPH-dependent fmn reductase family protein [Streptococcus pneumoniae 670-6B]
	Sequence	# Proteins	# Protein Groups	Activation Type	Modifications	Probability	XCorr	Δ Score	Rank	Charge	MH+ [Da]	ΔM [ppm]	First Scan	Last Scan	RT [min]	MSOrder	Ions Matched	Annotation
	AEVSYLDYSALPLFSQDLEVPTHPAVAAAR	4	1	CID		14.9811	1.95839	0	1	3	3230.65	8.52963	3531	3531	66.0789	MS2	20/116
gi307127771	13.13	1	259	0	hypothetical protein SP670_1646 [Streptococcus pneumoniae 670-6B]
	Sequence	# Proteins	# Protein Groups	Activation Type	Modifications	Probability	XCorr	Δ Score	Rank	Charge	MH+ [Da]	ΔM [ppm]	First Scan	Last Scan	RT [min]	MSOrder	Ions Matched	Annotation
	VTADLTDAGVGTIEVPLSIEDLPNGLTAVATPQK	1	1	CID		5.79586	1.70718	0	1	3	3405.8	4.80346	3644	3644	67.5939	MS2	18/132
gi307127779	6.83	1	410	0	ATP-dependent Clp protease, ATP-binding subunit ClpX [Streptococcus pneumoniae 670-6B]
	Sequence	# Proteins	# Protein Groups	Activation Type	Modifications	Probability	XCorr	Δ Score	Rank	Charge	MH+ [Da]	ΔM [ppm]	First Scan	Last Scan	RT [min]	MSOrder	Ions Matched	Annotation
	VIGFGQNNKAIDEnSSYmQEIIAEDIQK	3	1	CID	N14(Deamidated) M18(Oxidation)	3.12853	1.49518	0.0807474	5	3	3171.5	-20.102	2632	2632	54.8686	MS2	12/108
gi307127787	15.88	1	170	0	adenine phosphoribosyltransferase [Streptococcus pneumoniae 670-6B]
	Sequence	# Proteins	# Protein Groups	Activation Type	Modifications	Probability	XCorr	Δ Score	Rank	Charge	MH+ [Da]	ΔM [ppm]	First Scan	Last Scan	RT [min]	MSOrder	Ions Matched	Annotation
	DISPLmADGNAYSYAVREIVqYATDKK	2	1	CID	M6(Oxidation) Q21(Deamidated)	4.00446	0.928379	0.391554	6	4	3035.48	11.652	1840	1840	44.3222	MS2	19/156
gi307127788	11.9	3	252	0	SAM-dependent methyltransferase [Streptococcus pneumoniae 670-6B]
	Sequence	# Proteins	# Protein Groups	Activation Type	Modifications	Probability	XCorr	Δ Score	Rank	Charge	MH+ [Da]	ΔM [ppm]	First Scan	Last Scan	RT [min]	MSOrder	Ions Matched	Annotation
	AnAmKLPYQDASFDIVINEAMLTMQADQAK	2	1	CID	N2(Deamidated) M4(Oxidation)	5.54958	1.85458	0	1	4	3344.61	24.1272	3953	3953	72.2637	MS2	20/174
	ANAmKLPYqDASFDIVINEAMLTMQADQAK	2	1	CID	M4(Oxidation) Q9(Deamidated)	12.3418	1.2106	0.347239	4	4	3344.61	24.1272	3953	3953	72.2637	MS2	19/174
	ANAmKLPYQDASFDIVInEAMLTMQADQAK	2	1	CID	M4(Oxidation) N18(Deamidated)	5.54958	0.891299	0.519407	9	4	3344.61	24.1272	3953	3953	72.2637	MS2	18/174
gi307127794	11.07	3	524	0	cold-shock DEAD box protein A [Streptococcus pneumoniae 670-6B]
	Sequence	# Proteins	# Protein Groups	Activation Type	Modifications	Probability	XCorr	Δ Score	Rank	Charge	MH+ [Da]	ΔM [ppm]	First Scan	Last Scan	RT [min]	MSOrder	Ions Matched	Annotation
	SGqSITFVSPnEmGYLQIIEnLTKK	1	1	CID	Q3(Deamidated) N11(Deamidated) M13(Oxidation) N21(Deamidated)	5.0864	1.10665	0.339278	6	3	2816.39	2.57661	2218	2218	49.6777	MS2	15/96
	RIGVqFMKAPEHVKIAAK	1	1	CID	Q5(Deamidated)	3.54865	1.00865	0.104839	2	2	2024.13	-18.5235	3345	3345	63.7497	MS2	5/34
	LmDVAQPELAIVFGR	1	1	CID	M2(Oxidation)	2.14598	0.752964	0	1	2	1674.89	6.48876	2081	2081	47.8182	MS2	6/28
gi307127824	12.22	1	90	0	degenerate transposase [Streptococcus pneumoniae 670-6B]
	Sequence	# Proteins	# Protein Groups	Activation Type	Modifications	Probability	XCorr	Δ Score	Rank	Charge	MH+ [Da]	ΔM [ppm]	First Scan	Last Scan	RT [min]	MSOrder	Ions Matched	Annotation
	MmNCTPKVRQK	1	1	CID	M2(Oxidation)	4.00903	0.444382	0	1	2	1351.67	8.26872	1502	1502	39.3323	MS2	4/20
gi307127871	14.5	4	262	0	cell-division initiation protein [Streptococcus pneumoniae 670-6B]
	Sequence	# Proteins	# Protein Groups	Activation Type	Modifications	Probability	XCorr	Δ Score	Rank	Charge	MH+ [Da]	ΔM [ppm]	First Scan	Last Scan	RT [min]	MSOrder	Ions Matched	Annotation
	GFDPEEVDEFLDIVVR	4	1	CID		68.8688	1.82263	0	1	3	1878.91	0.662579	3984	3984	72.6585	MS2	19/60
	GFDPEEVDEFLDIVVR	4	1	CID		29.1773	1.09021	0.0242127	3	2	1878.91	0.187744	3954	3954	72.2699	MS2	13/30
	AnEILRqATDnAKK	4	1	CID	N2(Deamidated) Q7(Deamidated) N11(Deamidated)	13.4496	1.08271	0.469687	2	2	1574.81	11.8931	1653	1653	41.5384	MS2	8/26
	AnHDKnLR	4	1	CID	N2(Deamidated) N6(Deamidated)	3.12091	0.429839	0	1	1	969.477	1.93335	3200	3200	62.0261	MS2	2/14
gi307127877	19.69	6	457	0	cell division protein FtsA [Streptococcus pneumoniae 670-6B]
	Sequence	# Proteins	# Protein Groups	Activation Type	Modifications	Probability	XCorr	Δ Score	Rank	Charge	MH+ [Da]	ΔM [ppm]	First Scan	Last Scan	RT [min]	MSOrder	Ions Matched	Annotation
	TAQFVQSTPVQPAPAPEVEPVAPTEPMADFQQASQNKPK	1	1	CID		14.7402	1.98083	0	1	4	4161.07	14.4202	2092	2092	47.954	MS2	27/228
	TAQFVQSTPVQPAPAPEVEPVAPTEPMADFQQASQNKPK	1	1	CID		20.7388	1.83525	0	1	3	4161.06	-3.5717	2094	2094	47.965	MS2	16/152
	TAQFVQSTPVQPAPAPEVEPVAPTEPmADFQQASQNKPK	1	1	CID	M27(Oxidation)	16.9661	1.57929	0	1	4	4177.05	-3.44399	1865	1865	44.7016	MS2	24/228
	DGIIVDIDAAATAIKSAISqAEEK	1	1	CID	Q20(Deamidated)	2.54608	1.46483	0.196718	2	3	2430.27	11.673	3692	3692	68.3059	MS2	14/92
	SVNVGLPGNLLQVEPTQGmIPVTSDTK	1	1	CID	M19(Oxidation)	24.1968	1.18213	0	1	3	2810.46	3.63022	2413	2413	52.2035	MS2	18/104
	TAQFVQSTPVQPAPAPEVEPVAPTEPmADFQQASQNKPK	1	1	CID	M27(Oxidation)	59.0257	1.13353	0	1	3	4177.05	-2.02674	1688	1688	42.0476	MS2	24/152
gi307128107	6.48	1	540	0	chaperonin GroL [Streptococcus pneumoniae 670-6B]
	Sequence	# Proteins	# Protein Groups	Activation Type	Modifications	Probability	XCorr	Δ Score	Rank	Charge	MH+ [Da]	ΔM [ppm]	First Scan	Last Scan	RT [min]	MSOrder	Ions Matched	Annotation
	AAVEEGIVAGGGTALANVIPAVATLELTGDEATGR	2	1	CID		13.2404	1.43633	0	1	3	3293.72	1.30877	3928	3928	71.8956	MS2	20/136
gi307128163	14.23	3	274	0	DNA-entry nuclease [Streptococcus pneumoniae 670-6B]
	Sequence	# Proteins	# Protein Groups	Activation Type	Modifications	Probability	XCorr	Δ Score	Rank	Charge	MH+ [Da]	ΔM [ppm]	First Scan	Last Scan	RT [min]	MSOrder	Ions Matched	Annotation
	GSLEWNGSGAFIVnGNKTNLDAK	3	2	CID	N14(Deamidated)	3.13941	0.978894	0.0258386	2	3	2393.19	19.73	3188	3188	61.8713	MS2	10/88
	QmqSTANSPKTKLSQK	1	1	CID	M2(Oxidation) Q3(Deamidated)	2.34577	0.644191	0.324794	3	2	1793.92	12.8527	3987	3987	72.6918	MS2	4/30
	qmQSTANSPKTKLSQK	1	1	CID	Q1(Deamidated) M2(Oxidation)	2.34577	0.577416	0.394784	4	2	1793.92	12.8527	3987	3987	72.6918	MS2	4/30
gi307128240	3.86	1	207	0	hypothetical protein SP670_2119 [Streptococcus pneumoniae 670-6B]
	Sequence	# Proteins	# Protein Groups	Activation Type	Modifications	Probability	XCorr	Δ Score	Rank	Charge	MH+ [Da]	ΔM [ppm]	First Scan	Last Scan	RT [min]	MSOrder	Ions Matched	Annotation
	WEAnEEKR	3	1	CID	N4(Deamidated)	2.72872	0.732629	0	1	1	1062.49	8.90126	2362	2362	51.6198	MS2	3/14
gi307128305	28.07	1	57	0	hypothetical protein SP670_2184 [Streptococcus pneumoniae 670-6B]
	Sequence	# Proteins	# Protein Groups	Activation Type	Modifications	Probability	XCorr	Δ Score	Rank	Charge	MH+ [Da]	ΔM [ppm]	First Scan	Last Scan	RT [min]	MSOrder	Ions Matched	Annotation
	GADYRIHPmFIqIVSR	1	1	CID	M9(Oxidation) Q12(Deamidated)	9.56625	1.71002	0	1	3	1919.98	0.851638	3730	3730	68.8999	MS2	11/60
gi307128320	13.55	1	214	0	pyroglutamyl-peptidase I [Streptococcus pneumoniae 670-6B]
	Sequence	# Proteins	# Protein Groups	Activation Type	Modifications	Probability	XCorr	Δ Score	Rank	Charge	MH+ [Da]	ΔM [ppm]	First Scan	Last Scan	RT [min]	MSOrder	Ions Matched	Annotation
	AGFmHIPYMMEqVVnRPTTPAMSLVDIRR	1	1	CID	M4(Oxidation) Q12(Deamidated) N15(Deamidated)	3.84096	1.58677	0.0680986	2	4	3378.66	16.9787	3970	3970	72.4789	MS2	17/168
gi307128359	6.7	1	418	0	tyrosyl-tRNA synthetase [Streptococcus pneumoniae 670-6B]
	Sequence	# Proteins	# Protein Groups	Activation Type	Modifications	Probability	XCorr	Δ Score	Rank	Charge	MH+ [Da]	ΔM [ppm]	First Scan	Last Scan	RT [min]	MSOrder	Ions Matched	Annotation
	GVPNYQVQADEHNNIVELLVSSGIVNSK	2	1	CID		58.7581	1.8381	0	1	3	3023.54	-0.795644	3314	3314	63.4231	MS2	22/108
gi307128427	4.33	1	439	0	alpha-L-fucosidase [Streptococcus pneumoniae 670-6B]
	Sequence	# Proteins	# Protein Groups	Activation Type	Modifications	Probability	XCorr	Δ Score	Rank	Charge	MH+ [Da]	ΔM [ppm]	First Scan	Last Scan	RT [min]	MSOrder	Ions Matched	Annotation
	ATNTPAGRDLVKEFVDAVR	1	1	CID		8.58603	0.641539	0.80051	2	2	2059.09	-4.52065	3371	3371	64.0764	MS2	6/36
gi307128461	2.47	1	810	0	chaperone ClpB 1 [Streptococcus pneumoniae 670-6B]
	Sequence	# Proteins	# Protein Groups	Activation Type	Modifications	Probability	XCorr	Δ Score	Rank	Charge	MH+ [Da]	ΔM [ppm]	First Scan	Last Scan	RT [min]	MSOrder	Ions Matched	Annotation
	HLPDSAIDLLDEAAATVQNK	5	1	CID		13.9796	1.50312	0.0440337	2	3	2121.08	0.7617	3152	3152	61.3683	MS2	20/76
gi307128479	7.14	4	392	0	CHAP domain-containing protein [Streptococcus pneumoniae 670-6B]
	Sequence	# Proteins	# Protein Groups	Activation Type	Modifications	Probability	XCorr	Δ Score	Rank	Charge	MH+ [Da]	ΔM [ppm]	First Scan	Last Scan	RT [min]	MSOrder	Ions Matched	Annotation
	NQSLEKQARSAqTNGAVTSYINTIVNSK	2	1	CID	Q12(Deamidated)	3.66005	1.26602	0.311232	5	3	3023.54	3.23836	3314	3314	63.4231	MS2	17/108
	NqSLEKQARSAQTNGAVTSYINTIVNSK	2	1	CID	Q2(Deamidated)	8.83539	1.2374	0.326803	6	3	3023.54	3.23836	3314	3314	63.4231	MS2	19/108
	nQSLEKQARSAQTNGAVTSYINTIVNSK	2	1	CID	N1(Deamidated)	8.83539	1.18078	0.357606	7	3	3023.54	3.23836	3314	3314	63.4231	MS2	19/108
	NQSLEKqARSAQTNGAVTSYINTIVNSK	2	1	CID	Q7(Deamidated)	8.83539	1.17707	0.359627	8	3	3023.54	3.23836	3314	3314	63.4231	MS2	18/108
gi307128488	7.69	5	416	0	peptidase, M16 family [Streptococcus pneumoniae 670-6B]
	Sequence	# Proteins	# Protein Groups	Activation Type	Modifications	Probability	XCorr	Δ Score	Rank	Charge	MH+ [Da]	ΔM [ppm]	First Scan	Last Scan	RT [min]	MSOrder	Ions Matched	Annotation
	LEqIDKDAICRVAnNVK	4	1	CID	Q3(Deamidated) N14(Deamidated)	4.19184	1.76015	0.0890033	2	3	1930.99	-4.05206	2800	2800	56.9944	MS2	11/64
	LEqIDKDAICRVANnVK	4	1	CID	Q3(Deamidated) N15(Deamidated)	4.19184	1.54158	0.202128	3	3	1930.99	-4.05206	2800	2800	56.9944	MS2	11/64
	LEqIDKDAICRVANnVK	4	1	CID	Q3(Deamidated) N15(Deamidated)	8.70885	1.15507	0.396772	5	3	1930.99	-4.23516	2056	2056	47.4354	MS2	12/64
	LEqIDKDAICRVAnNVK	4	1	CID	Q3(Deamidated) N14(Deamidated)	8.70885	0.968902	0.493999	8	3	1930.99	-4.23516	2056	2056	47.4354	MS2	12/64
	NQARKMMNnqLLDLK	4	1	CID	N9(Deamidated) Q10(Deamidated)	3.08771	0.455535	0.530406	2	2	1818.91	-8.25047	2271	2271	50.4476	MS2	5/28
gi225858092	5.17	1	445	0	hypothetical protein SP70585_0294 [Streptococcus pneumoniae 70585]
	Sequence	# Proteins	# Protein Groups	Activation Type	Modifications	Probability	XCorr	Δ Score	Rank	Charge	MH+ [Da]	ΔM [ppm]	First Scan	Last Scan	RT [min]	MSOrder	Ions Matched	Annotation
	AANLVAVGDEIAAELGIPIVNKR	1	1	CID		10.904	1.36145	0	1	3	2333.31	-6.81543	4118	4118	74.2864	MS2	16/88
gi225858204	8.64	1	243	0	tyrosine-protein phosphatase CpsB [Streptococcus pneumoniae 70585]
	Sequence	# Proteins	# Protein Groups	Activation Type	Modifications	Probability	XCorr	Δ Score	Rank	Charge	MH+ [Da]	ΔM [ppm]	First Scan	Last Scan	RT [min]	MSOrder	Ions Matched	Annotation
	ALLAESYRqGVRIIVSTSHRR	1	1	CID	Q9(Deamidated)	19.7758	0.519595	0.234538	2	3	2413.35	6.56381	3111	3111	60.7816	MS2	9/80
gi225858338	2.16	5	1622	0	endo-beta-N-acetylglucosaminidase D [Streptococcus pneumoniae 70585]
	Sequence	# Proteins	# Protein Groups	Activation Type	Modifications	Probability	XCorr	Δ Score	Rank	Charge	MH+ [Da]	ΔM [ppm]	First Scan	Last Scan	RT [min]	MSOrder	Ions Matched	Annotation
	DHEISTQDQVNDRLNK	1	1	CID		8.71392	1.23874	0	1	2	1911.93	18.9145	2926	2926	58.467	MS2	5/30
	DHEISTqDQVNDRLnK	1	1	CID	Q7(Deamidated) N15(Deamidated)	3.10093	0.606304	0.656179	2	3	1913.87	-11.6309	2802	2802	57.0066	MS2	9/60
	DHEISTqDQVnDRLNK	1	1	CID	Q7(Deamidated) N11(Deamidated)	3.10093	0.444382	0.748002	3	3	1913.87	-11.6309	2802	2802	57.0066	MS2	8/60
	IPIEKDKKVK	4	1	CID		7.69971	0.424233	0	1	2	1197.75	-3.01366	2445	2445	52.5225	MS2	6/18
	FnSWEELLK	4	1	CID	N2(Deamidated)	7.44525	0.400777	0.390755	2	2	1166.57	-0.065795	1547	1547	39.9534	MS2	2/16
gi225858425	3.26	1	737	0	polynucleotide phosphorylase/polyadenylase [Streptococcus pneumoniae 70585]
	Sequence	# Proteins	# Protein Groups	Activation Type	Modifications	Probability	XCorr	Δ Score	Rank	Charge	MH+ [Da]	ΔM [ppm]	First Scan	Last Scan	RT [min]	MSOrder	Ions Matched	Annotation
	FEILDVIEATIPEVRPELAPTAPK	4	1	CID		6.49567	1.64404	0	1	3	2648.46	1.82479	4103	4103	74.1127	MS2	17/92
gi225858823	4.88	1	451	0	methyl transferase [Streptococcus pneumoniae 70585]
	Sequence	# Proteins	# Protein Groups	Activation Type	Modifications	Probability	XCorr	Δ Score	Rank	Charge	MH+ [Da]	ΔM [ppm]	First Scan	Last Scan	RT [min]	MSOrder	Ions Matched	Annotation
	ECFRLQGFPDWAYERAESVSSK	1	1	CID		4.63426	1.74024	0.330558	2	4	2605.24	23.5803	2959	2959	58.8767	MS2	15/126
gi225858841	31.91	1	47	0	drug-resistant methionyl-tRNA synthetase [Streptococcus pneumoniae 70585]
	Sequence	# Proteins	# Protein Groups	Activation Type	Modifications	Probability	XCorr	Δ Score	Rank	Charge	MH+ [Da]	ΔM [ppm]	First Scan	Last Scan	RT [min]	MSOrder	Ions Matched	Annotation
	TKLnTWnYISnLPnK	1	1	CID	N4(Deamidated) N7(Deamidated) N11(Deamidated) N14(Deamidated)	3.11581	0.875357	0	1	3	1809.88	-15.358	1592	1592	40.6461	MS2	9/56
gi225858875	15.7	1	121	0	putative mobilization protein MobC [Streptococcus pneumoniae 70585]
	Sequence	# Proteins	# Protein Groups	Activation Type	Modifications	Probability	XCorr	Δ Score	Rank	Charge	MH+ [Da]	ΔM [ppm]	First Scan	Last Scan	RT [min]	MSOrder	Ions Matched	Annotation
	GISELITGVEKDFqVEVnR	1	1	CID	Q14(Deamidated) N18(Deamidated)	7.42781	1.34735	0	1	3	2135.08	-6.16274	3727	3727	68.8451	MS2	11/72
gi225859041	2.54	2	1179	0	chromosome segregation protein SMC [Streptococcus pneumoniae 70585]
	Sequence	# Proteins	# Protein Groups	Activation Type	Modifications	Probability	XCorr	Δ Score	Rank	Charge	MH+ [Da]	ΔM [ppm]	First Scan	Last Scan	RT [min]	MSOrder	Ions Matched	Annotation
	IENELEnSRQLSQK	2	1	CID	N7(Deamidated)	10.4401	0.608037	0.107508	2	2	1688.86	12.7984	2085	2085	47.8589	MS2	5/26
	HIYRSGDSEYKIDGKK	2	1	CID		4.2617	0.413677	0.297664	3	2	1895.95	-9.9639	3487	3487	65.5554	MS2	3/30
gi225859213	7.58	2	211	0	hypothetical protein SP70585_1490 [Streptococcus pneumoniae 70585]
	Sequence	# Proteins	# Protein Groups	Activation Type	Modifications	Probability	XCorr	Δ Score	Rank	Charge	MH+ [Da]	ΔM [ppm]	First Scan	Last Scan	RT [min]	MSOrder	Ions Matched	Annotation
	MAVqLLEnWLLKEqEK	2	1	CID	Q4(Deamidated) N8(Deamidated) Q14(Deamidated)	5.39063	1.85858	0	1	3	1975.02	6.11675	3771	3771	69.48	MS2	12/60
	MAVqLLEnWLLKEqEK	2	1	CID	Q4(Deamidated) N8(Deamidated) Q14(Deamidated)	7.18621	0.709442	0.550499	5	3	1975.02	6.48296	3973	3973	72.512	MS2	10/60
gi225859290	23.23	1	99	0	hypothetical protein SP70585_1574 [Streptococcus pneumoniae 70585]
	Sequence	# Proteins	# Protein Groups	Activation Type	Modifications	Probability	XCorr	Δ Score	Rank	Charge	MH+ [Da]	ΔM [ppm]	First Scan	Last Scan	RT [min]	MSOrder	Ions Matched	Annotation
	AYMYVLECRDGSYYIGYTTDVRR	2	1	CID		8.71728	1.74878	0.0811108	2	3	2794.3	7.44586	1786	1786	43.5588	MS2	15/88
gi225859570	5.3	1	491	0	arylsulfatase [Streptococcus pneumoniae 70585]
	Sequence	# Proteins	# Protein Groups	Activation Type	Modifications	Probability	XCorr	Δ Score	Rank	Charge	MH+ [Da]	ΔM [ppm]	First Scan	Last Scan	RT [min]	MSOrder	Ions Matched	Annotation
	YYFDMYMERLPqFLDLHIGnWEVLEK	2	1	CID	Q12(Deamidated) N20(Deamidated)	2.70417	1.52403	0.203453	2	3	3351.58	6.93657	2997	2997	59.3543	MS2	13/100
gi225859646	1.98	1	655	0	pts system, trehalose-specific iibc component [Streptococcus pneumoniae 70585]
	Sequence	# Proteins	# Protein Groups	Activation Type	Modifications	Probability	XCorr	Δ Score	Rank	Charge	MH+ [Da]	ΔM [ppm]	First Scan	Last Scan	RT [min]	MSOrder	Ions Matched	Annotation
	ANVKAIESIPAVK	4	1	CID		6.52517	0.491113	0	1	2	1339.81	11.2604	2366	2366	51.6573	MS2	8/24
gi225859720	14.6	2	274	0	DNA-entry nuclease (Competence-specific nuclease) [Streptococcus pneumoniae 70585]
	Sequence	# Proteins	# Protein Groups	Activation Type	Modifications	Probability	XCorr	Δ Score	Rank	Charge	MH+ [Da]	ΔM [ppm]	First Scan	Last Scan	RT [min]	MSOrder	Ions Matched	Annotation
	GSLEWNGSGAFIVnGNKTNLDAK	3	2	CID	N14(Deamidated)	3.13941	0.978894	0.0258386	2	3	2393.19	19.73	3188	3188	61.8713	MS2	10/88
	qMPSAPnSPKTNLSQKK	1	1	CID	Q1(Deamidated) N7(Deamidated)	3.61429	0.803364	0	1	2	1857.92	-16.3831	2457	2457	52.6926	MS2	9/32
gi225859758	5.21	1	365	0	histidine kinase [Streptococcus pneumoniae 70585]
	Sequence	# Proteins	# Protein Groups	Activation Type	Modifications	Probability	XCorr	Δ Score	Rank	Charge	MH+ [Da]	ΔM [ppm]	First Scan	Last Scan	RT [min]	MSOrder	Ions Matched	Annotation
	IGQDLHDSLGHTFAMLSVK	1	1	CID		18.8249	0.438086	0.0293229	2	2	2069.05	5.71552	1814	1814	43.9662	MS2	5/36
gi225859917	2.5	2	881	0	glycosyl hydrolase, family 38 [Streptococcus pneumoniae 70585]
	Sequence	# Proteins	# Protein Groups	Activation Type	Modifications	Probability	XCorr	Δ Score	Rank	Charge	MH+ [Da]	ΔM [ppm]	First Scan	Last Scan	RT [min]	MSOrder	Ions Matched	Annotation
	EFEVEFALECHQAqERFSAYRR	3	1	CID	Q14(Deamidated)	2.80859	1.44446	0	1	3	2746.24	-23.3963	1910	1910	45.323	MS2	9/84
	EFEVEFALECHqAQERFSAYRR	3	1	CID	Q12(Deamidated)	2.80859	1.38467	0.0413934	4	3	2746.24	-23.3963	1910	1910	45.323	MS2	9/84
gi307066769	16.95	4	354	0	hypothetical protein SPAP_0139 [Streptococcus pneumoniae AP200]
	Sequence	# Proteins	# Protein Groups	Activation Type	Modifications	Probability	XCorr	Δ Score	Rank	Charge	MH+ [Da]	ΔM [ppm]	First Scan	Last Scan	RT [min]	MSOrder	Ions Matched	Annotation
	NTQVEEEVSQAEVELESQQEEK	3	1	CID		9.94695	1.8626	0	1	3	2562.17	-1.53668	2068	2068	47.5942	MS2	19/84
	NTQVEEEVSQAEVELESQQEEK	3	1	CID		85.3786	1.47156	0	1	2	2562.17	-2.49979	2005	2005	46.6679	MS2	12/42
	SLESPYIPDQAPKSRDK	2	1	CID		4.19184	1.07885	0.441622	4	3	1930.99	-0.660058	2800	2800	56.9944	MS2	11/64
	AqEVADKAEETIANLDTPIGK	1	1	CID	Q2(Deamidated)	4.7283	0.604429	0.0303428	2	2	2214.13	18.6545	2609	2609	54.5949	MS2	5/40
gi307066920	9.18	3	316	0	spermidine/putrescine ABC transporter ATPase [Streptococcus pneumoniae AP200]
	Sequence	# Proteins	# Protein Groups	Activation Type	Modifications	Probability	XCorr	Δ Score	Rank	Charge	MH+ [Da]	ΔM [ppm]	First Scan	Last Scan	RT [min]	MSOrder	Ions Matched	Annotation
	InTqKLnIFSADGSqNLIK	4	1	CID	N2(Deamidated) Q4(Deamidated) N7(Deamidated) Q15(Deamidated)	4.40511	1.55096	0.00423521	2	3	2108.09	12.995	2728	2728	56.0591	MS2	13/72
	InTqKLnIFSADGSQnLIK	4	1	CID	N2(Deamidated) Q4(Deamidated) N7(Deamidated) N16(Deamidated)	4.40511	1.50417	0.034271	3	3	2108.09	12.995	2728	2728	56.0591	MS2	13/72
	DNVAFGLMqK	3	1	CID	Q9(Deamidated)	2.7748	0.813129	0	1	1	1123.54	-3.17303	2874	2874	57.7677	MS2	5/18
gi307066925	8.28	1	326	0	transcriptional regulator [Streptococcus pneumoniae AP200]
	Sequence	# Proteins	# Protein Groups	Activation Type	Modifications	Probability	XCorr	Δ Score	Rank	Charge	MH+ [Da]	ΔM [ppm]	First Scan	Last Scan	RT [min]	MSOrder	Ions Matched	Annotation
	FHGECTFmNATIVQENKLLADGILQSR	2	1	CID	M8(Oxidation)	13.5067	0.899764	0.499148	5	4	3051.48	-26.5793	1302	1302	35.6855	MS2	16/156
gi307067010	4.38	1	365	0	putative glycosyl transferase [Streptococcus pneumoniae AP200]
	Sequence	# Proteins	# Protein Groups	Activation Type	Modifications	Probability	XCorr	Δ Score	Rank	Charge	MH+ [Da]	ΔM [ppm]	First Scan	Last Scan	RT [min]	MSOrder	Ions Matched	Annotation
	KLEDnIVFLGqFDDMK	1	1	CID	N5(Deamidated) Q11(Deamidated)	2.89098	0.481087	0.550021	2	2	1913.92	2.93	1405	1405	37.5538	MS2	6/30
gi307067022	4.45	1	719	0	membrane carboxypeptidase [Streptococcus pneumoniae AP200]
	Sequence	# Proteins	# Protein Groups	Activation Type	Modifications	Probability	XCorr	Δ Score	Rank	Charge	MH+ [Da]	ΔM [ppm]	First Scan	Last Scan	RT [min]	MSOrder	Ions Matched	Annotation
	EFSNVGTRAMKETTAYmMTDmMKTVLSYGTGR	2	1	CID	M17(Oxidation) M21(Oxidation)	5.67868	0.902535	0.200384	2	3	3639.64	-23.5463	1348	1348	36.5883	MS2	13/124
gi307067435	3.59	2	306	0	panthothenate kinase [Streptococcus pneumoniae AP200]
	Sequence	# Proteins	# Protein Groups	Activation Type	Modifications	Probability	XCorr	Δ Score	Rank	Charge	MH+ [Da]	ΔM [ppm]	First Scan	Last Scan	RT [min]	MSOrder	Ions Matched	Annotation
	ISRqTWQSLHR	2	1	CID	Q4(Deamidated)	3.0667	0.692467	0	1	2	1412.73	-11.9027	1807	1807	43.8282	MS2	6/20
	ISRQTWqSLHR	2	1	CID	Q7(Deamidated)	3.0667	0.453126	0.345635	2	2	1412.73	-11.9027	1807	1807	43.8282	MS2	6/20
gi307067494	6.14	3	603	0	type IV secretory pathway protein VirD4 [Streptococcus pneumoniae AP200]
	Sequence	# Proteins	# Protein Groups	Activation Type	Modifications	Probability	XCorr	Δ Score	Rank	Charge	MH+ [Da]	ΔM [ppm]	First Scan	Last Scan	RT [min]	MSOrder	Ions Matched	Annotation
	FMLSNIPYLSFFYIGnILSK	1	1	CID	N16(Deamidated)	2.7823	1.73038	0	1	3	2368.22	-8.73381	3622	3622	67.3256	MS2	13/76
	FMLSnIPYLSFFYIGNILSK	1	1	CID	N5(Deamidated)	2.7823	1.25751	0.273277	3	3	2368.22	-8.73381	3622	3622	67.3256	MS2	17/76
	ELmSEDELELDKIGDRK	1	1	CID	M3(Oxidation)	8.75532	0.474969	0	1	2	2035.98	-0.55749	2971	2971	59.0309	MS2	5/32
gi307067505	1.98	3	807	0	type IV secretory pathway, VirB4 component [Streptococcus pneumoniae AP200]
	Sequence	# Proteins	# Protein Groups	Activation Type	Modifications	Probability	XCorr	Δ Score	Rank	Charge	MH+ [Da]	ΔM [ppm]	First Scan	Last Scan	RT [min]	MSOrder	Ions Matched	Annotation
	GSLnVFnNRSNVDLnR	1	1	CID	N4(Deamidated) N7(Deamidated) N15(Deamidated)	2.58073	1.00979	0.0780803	3	2	1821.89	18.0133	3997	3997	72.816	MS2	6/30
	GSLnVFNNRSnVDLnR	1	1	CID	N4(Deamidated) N11(Deamidated) N15(Deamidated)	2.58073	0.923687	0.156689	4	2	1821.89	18.0133	3997	3997	72.816	MS2	7/30
	GSLNVFnNRSnVDLnR	1	1	CID	N7(Deamidated) N11(Deamidated) N15(Deamidated)	2.58073	0.89695	0.181099	6	2	1821.89	18.0133	3997	3997	72.816	MS2	8/30
gi307067508	9.87	9	527	0	hypothetical protein SPAP_0883 [Streptococcus pneumoniae AP200]
	Sequence	# Proteins	# Protein Groups	Activation Type	Modifications	Probability	XCorr	Δ Score	Rank	Charge	MH+ [Da]	ΔM [ppm]	First Scan	Last Scan	RT [min]	MSOrder	Ions Matched	Annotation
	DEKEFAVFqVDKnFYNIINKDGK	1	1	CID	Q9(Deamidated) N13(Deamidated)	4.70883	1.27841	0.320732	7	4	2763.36	8.19448	1806	1806	43.8219	MS2	15/132
	ELEEKIKGLEEK	1	1	CID		2.26446	0.817643	0	1	2	1444.79	-1.29776	1893	1893	45.0653	MS2	3/22
	ADDKnILNqFDLnKmK	1	1	CID	N5(Deamidated) Q9(Deamidated) N13(Deamidated) M15(Oxidation)	4.06354	0.712058	0.345786	3	2	1925.93	9.27834	2957	2957	58.8509	MS2	4/30
	ADDKnILnqFDLNKmK	1	1	CID	N5(Deamidated) N8(Deamidated) Q9(Deamidated) M15(Oxidation)	4.06354	0.647231	0.405347	4	2	1925.93	9.27834	2957	2957	58.8509	MS2	3/30
	ADDKNILnqFDLnKmK	1	1	CID	N8(Deamidated) Q9(Deamidated) N13(Deamidated) M15(Oxidation)	4.06354	0.616943	0.433174	5	2	1925.93	9.27834	2957	2957	58.8509	MS2	4/30
	ADDKnILNQFDLnKmKK	1	1	CID	N5(Deamidated) N13(Deamidated) M15(Oxidation)	5.61572	0.603287	0.0226516	2	2	2053.03	3.67102	1744	1744	42.8702	MS2	5/32
	ADDKnILnQFDLnKmK	1	1	CID	N5(Deamidated) N8(Deamidated) N13(Deamidated) M15(Oxidation)	4.06354	0.595511	0.452866	6	2	1925.93	9.27834	2957	2957	58.8509	MS2	3/30
	ADDKnILNqFDLNKmKK	1	1	CID	N5(Deamidated) Q9(Deamidated) M15(Oxidation)	5.61572	0.548445	0.111497	3	2	2053.03	3.67102	1744	1744	42.8702	MS2	5/32
	ADDKnILnQFDLNKmKK	1	1	CID	N5(Deamidated) N8(Deamidated) M15(Oxidation)	5.61572	0.526583	0.146914	4	2	2053.03	3.67102	1744	1744	42.8702	MS2	5/32
gi307067514	3.67	4	2098	0	DNA methylase [Streptococcus pneumoniae AP200]
	Sequence	# Proteins	# Protein Groups	Activation Type	Modifications	Probability	XCorr	Δ Score	Rank	Charge	MH+ [Da]	ΔM [ppm]	First Scan	Last Scan	RT [min]	MSOrder	Ions Matched	Annotation
	ENLSTQLVFSDMSTPK	1	1	CID		3.42423	1.08516	0	1	2	1796.87	-5.1155	2151	2151	48.7356	MS2	8/30
	VIGNNQKYDFSSqLSIYnKEPEAR	1	1	CID	Q13(Deamidated) N18(Deamidated)	3.69421	0.996764	0.17241	7	3	2802.35	-12.4971	3685	3685	68.2175	MS2	15/92
	YINSRCEFLGAmRLPNTTFK	1	1	CID	M12(Oxidation)	5.13765	0.534375	0.125685	4	2	2377.19	15.3914	3838	3838	70.3453	MS2	5/38
	ETmLASqKqELIKEEFK	1	1	CID	M3(Oxidation) Q7(Deamidated) Q9(Deamidated)	3.52588	0.455525	0.406932	2	2	2070.03	3.00899	1412	1412	37.6698	MS2	8/32
gi307067535	0.9	1	556	0	site-specific recombinase [Streptococcus pneumoniae AP200]
	Sequence	# Proteins	# Protein Groups	Activation Type	Modifications	Probability	XCorr	Δ Score	Rank	Charge	MH+ [Da]	ΔM [ppm]	First Scan	Last Scan	RT [min]	MSOrder	Ions Matched	Annotation
	TIIVK	1	1	CID		2.44988	0.658821	0	1	1	573.4	2.48484	4780	4780	82.353	MS2	3/8
gi307067862	2.46	1	976	0	hypothetical protein SPAP_1238 [Streptococcus pneumoniae AP200]
	Sequence	# Proteins	# Protein Groups	Activation Type	Modifications	Probability	XCorr	Δ Score	Rank	Charge	MH+ [Da]	ΔM [ppm]	First Scan	Last Scan	RT [min]	MSOrder	Ions Matched	Annotation
	qqnTDIDIFEKLLSINVnELSTPK	2	1	CID	Q1(Deamidated) Q2(Deamidated) N3(Deamidated) N18(Deamidated)	4.08338	1.83649	0.0241997	2	4	2763.36	-22.8275	1806	1806	43.8219	MS2	16/138
gi307068140	21.69	3	83	0	hypothetical protein SPAP_1518 [Streptococcus pneumoniae AP200]
	Sequence	# Proteins	# Protein Groups	Activation Type	Modifications	Probability	XCorr	Δ Score	Rank	Charge	MH+ [Da]	ΔM [ppm]	First Scan	Last Scan	RT [min]	MSOrder	Ions Matched	Annotation
	TTNRLANDLnNVLKqADK	2	1	CID	N10(Deamidated) Q15(Deamidated)	2.51582	1.5987	0.110068	3	3	2030.04	-13.4263	2078	2078	47.7651	MS2	13/68
	TTNRLANDLNnVLKqADK	2	1	CID	N11(Deamidated) Q15(Deamidated)	2.51582	1.48174	0.175175	5	3	2030.04	-13.4263	2078	2078	47.7651	MS2	12/68
	TTnRLANDLNNVLKqADK	2	1	CID	N3(Deamidated) Q15(Deamidated)	2.51582	1.26753	0.294415	8	3	2030.04	-13.4263	2078	2078	47.7651	MS2	14/68
gi307068280	2.44	3	902	0	antimicrobial peptide ABC transporter permease [Streptococcus pneumoniae AP200]
	Sequence	# Proteins	# Protein Groups	Activation Type	Modifications	Probability	XCorr	Δ Score	Rank	Charge	MH+ [Da]	ΔM [ppm]	First Scan	Last Scan	RT [min]	MSOrder	Ions Matched	Annotation
	qHQEELEqILSDNGKVRLRLLK	1	1	CID	Q1(Deamidated) Q8(Deamidated)	11.6701	1.02441	0	1	3	2648.43	-8.58856	2611	2611	54.6206	MS2	12/84
	QHqEELEqILSDNGKVRLRLLK	1	1	CID	Q3(Deamidated) Q8(Deamidated)	11.6701	1.01119	0.0129107	2	3	2648.43	-8.58856	2611	2611	54.6206	MS2	12/84
	qHqEELEQILSDNGKVRLRLLK	1	1	CID	Q1(Deamidated) Q3(Deamidated)	19.2252	1.0099	0.0141627	3	3	2648.43	-8.58856	2611	2611	54.6206	MS2	13/84
gi221231005	4.57	2	1312	0	beta-N-acetylhexosaminidase precursor [Streptococcus pneumoniae ATCC 700669]
	Sequence	# Proteins	# Protein Groups	Activation Type	Modifications	Probability	XCorr	Δ Score	Rank	Charge	MH+ [Da]	ΔM [ppm]	First Scan	Last Scan	RT [min]	MSOrder	Ions Matched	Annotation
	AALQGLKPAATHSGSLDENEVAANVETRPELITR	6	1	CID		4.96841	1.95591	0.107214	2	5	3558.85	-3.45572	1617	1617	41.0455	MS2	27/264
	HFANANAEYFAADYESAEQALNEVPK	5	1	CID		38.0067	1.74353	0	1	3	2899.32	-0.549862	2910	2910	58.2513	MS2	16/100
gi221231868	1.44	4	1737	0	Zinc metalloprotease ZmpD [Streptococcus pneumoniae ATCC 700669]
	Sequence	# Proteins	# Protein Groups	Activation Type	Modifications	Probability	XCorr	Δ Score	Rank	Charge	MH+ [Da]	ΔM [ppm]	First Scan	Last Scan	RT [min]	MSOrder	Ions Matched	Annotation
	YEInEPVVNRLnRLTR	1	1	CID	N4(Deamidated) N12(Deamidated)	7.78999	0.655443	0	1	2	1988.04	-11.0738	3287	3287	63.0847	MS2	7/30
	YEINEPVVnRLnRLTR	1	1	CID	N9(Deamidated) N12(Deamidated)	7.78999	0.616626	0.0592229	2	2	1988.04	-11.0738	3287	3287	63.0847	MS2	7/30
	LEDNISMMR	1	1	CID		6.16656	0.568969	0	1	1	1108.52	7.53031	2354	2354	51.5149	MS2	6/16
	YEInEPVVnRLNRLTR	1	1	CID	N4(Deamidated) N9(Deamidated)	7.78999	0.474748	0.275684	3	2	1988.04	-11.0738	3287	3287	63.0847	MS2	7/30
gi221232025	8.54	4	609	0	relaxase [Streptococcus pneumoniae ATCC 700669]
	Sequence	# Proteins	# Protein Groups	Activation Type	Modifications	Probability	XCorr	Δ Score	Rank	Charge	MH+ [Da]	ΔM [ppm]	First Scan	Last Scan	RT [min]	MSOrder	Ions Matched	Annotation
	QFTLQHEPQHmYRRIPLSK	1	1	CID	M11(Oxidation)	2.546	1.25926	0.515897	2	2	2425.25	-1.38417	3915	3915	71.6617	MS2	7/36
	TKNLALVSDFGMR	1	1	CID		4.74347	0.558284	0	1	2	1451.76	-8.14429	3149	3149	61.3362	MS2	3/24
	NYLDFPSYKELVK	1	1	CID		4.23987	0.524266	0	1	2	1615.83	-2.03897	2284	2284	50.5842	MS2	4/24
	DSADKNR	1	1	CID		6.91143	0.413858	0.0695068	3	1	805.387	6.62435	3422	3422	64.7295	MS2	5/12
gi221232029	1.42	1	1334	0	DNA helicase II, UvrD [Streptococcus pneumoniae ATCC 700669]
	Sequence	# Proteins	# Protein Groups	Activation Type	Modifications	Probability	XCorr	Δ Score	Rank	Charge	MH+ [Da]	ΔM [ppm]	First Scan	Last Scan	RT [min]	MSOrder	Ions Matched	Annotation
	SGYLKDGVVAVEVPIQGIR	1	1	CID		3.74253	0.900986	0	1	3	2000.11	-9.90113	3183	3183	61.7993	MS2	12/72
gi221232055	8.54	2	246	0	lantibiotic ABC transporter [Streptococcus pneumoniae ATCC 700669]
	Sequence	# Proteins	# Protein Groups	Activation Type	Modifications	Probability	XCorr	Δ Score	Rank	Charge	MH+ [Da]	ΔM [ppm]	First Scan	Last Scan	RT [min]	MSOrder	Ions Matched	Annotation
	YRImNnLKLASANLmKTFWAK	1	1	CID	M4(Oxidation) N6(Deamidated) M15(Oxidation)	10.677	1.79218	0	1	3	2546.31	-19.3646	3471	3471	65.3608	MS2	16/80
	YRImnNLKLASANLmKTFWAK	1	1	CID	M4(Oxidation) N5(Deamidated) M15(Oxidation)	10.677	1.45289	0.189319	3	3	2546.31	-19.3646	3471	3471	65.3608	MS2	14/80
gi221232258	1.52	2	1774	0	collagen-like surface-anchored protein [Streptococcus pneumoniae ATCC 700669]
	Sequence	# Proteins	# Protein Groups	Activation Type	Modifications	Probability	XCorr	Δ Score	Rank	Charge	MH+ [Da]	ΔM [ppm]	First Scan	Last Scan	RT [min]	MSOrder	Ions Matched	Annotation
	GLTGAqGAKGEK	1	1	CID	Q6(Deamidated)	3.13687	0.785869	0.0291806	2	2	1117.58	-8.7499	100	100	7.38468	MS2	8/22
	EVVIADGKQGPKGDK	1	1	CID		3.39405	0.490594	0	1	2	1540.83	-0.107959	1655	1655	41.5502	MS2	5/28
gi221232505	0.73	1	817	0	glycosyltransferase [Streptococcus pneumoniae ATCC 700669]
	Sequence	# Proteins	# Protein Groups	Activation Type	Modifications	Probability	XCorr	Δ Score	Rank	Charge	MH+ [Da]	ΔM [ppm]	First Scan	Last Scan	RT [min]	MSOrder	Ions Matched	Annotation
	SIWEnR	1	1	CID	N5(Deamidated)	19.5437	0.444772	0	1	1	805.387	2.60835	3422	3422	64.7295	MS2	4/10
gi221232509	3.03	3	694	0	glycosyl transferase [Streptococcus pneumoniae ATCC 700669]
	Sequence	# Proteins	# Protein Groups	Activation Type	Modifications	Probability	XCorr	Δ Score	Rank	Charge	MH+ [Da]	ΔM [ppm]	First Scan	Last Scan	RT [min]	MSOrder	Ions Matched	Annotation
	LFEQLRFDmGK	2	1	CID	M9(Oxidation)	2.90201	0.54833	0	1	2	1399.71	2.05392	1408	1408	37.6121	MS2	6/20
	LGEDGYLnQK	2	1	CID	N8(Deamidated)	15.4098	0.473093	0	1	1	1137.55	8.98224	4217	4217	75.5722	MS2	4/18
	LGEDGYLNqK	2	1	CID	Q9(Deamidated)	15.4098	0.426088	0.0993558	2	1	1137.55	8.98224	4217	4217	75.5722	MS2	3/18
gi182683910	5.15	1	330	0	dihydroorotate dehydrogenase [Streptococcus pneumoniae CGSP14]
	Sequence	# Proteins	# Protein Groups	Activation Type	Modifications	Probability	XCorr	Δ Score	Rank	Charge	MH+ [Da]	ΔM [ppm]	First Scan	Last Scan	RT [min]	MSOrder	Ions Matched	Annotation
	IMTTNRLQVSLPGLDLK	1	1	CID		5.6983	0.462226	0	1	2	1899.06	-15.6265	3251	3251	62.6773	MS2	4/32
gi182684006	7.52	1	226	0	degenerate transposase [Streptococcus pneumoniae CGSP14]
	Sequence	# Proteins	# Protein Groups	Activation Type	Modifications	Probability	XCorr	Δ Score	Rank	Charge	MH+ [Da]	ΔM [ppm]	First Scan	Last Scan	RT [min]	MSOrder	Ions Matched	Annotation
	AEFPSKPqEDTLVAELR	2	1	CID	Q8(Deamidated)	5.5427	0.800795	0.338825	6	3	1930.99	9.82152	3050	3050	60.0059	MS2	10/64
gi182684032	2.08	1	721	0	amino acid ABC transporter amino acid-binding protein/permease [Streptococcus pneumoniae CGSP14]
	Sequence	# Proteins	# Protein Groups	Activation Type	Modifications	Probability	XCorr	Δ Score	Rank	Charge	MH+ [Da]	ΔM [ppm]	First Scan	Last Scan	RT [min]	MSOrder	Ions Matched	Annotation
	ISKYDqLTGKTVGVK	1	1	CID	Q6(Deamidated)	3.61174	0.680418	0	1	2	1637.91	-5.60626	3437	3437	64.9311	MS2	3/28
gi182684113	5.14	3	1908	0	immunoglobulin A1 protease [Streptococcus pneumoniae CGSP14]
	Sequence	# Proteins	# Protein Groups	Activation Type	Modifications	Probability	XCorr	Δ Score	Rank	Charge	MH+ [Da]	ΔM [ppm]	First Scan	Last Scan	RT [min]	MSOrder	Ions Matched	Annotation
	GEPAVQPELPEAVVTDKGETEVQPESPDTVVSDK	3	3	CID		9.13793	1.86015	0	1	3	3576.75	7.69287	1738	1738	42.8175	MS2	20/132
	FDLDqDGnnVYATnVVRR	1	1	CID	Q5(Deamidated) N8(Deamidated) N9(Deamidated) N14(Deamidated)	4.91529	0.847412	0.546681	3	3	2099.96	7.80151	2182	2182	49.1526	MS2	8/68
	QVAPLPEYTGPQASAIVEPEQVAPLPEYTGVQAGSIVEPEKVEAPK	2	2	CID		23.975	0.468839	0	1	4	4813.49	4.50788	2906	2906	58.2009	MS2	28/270
gi182684187	4.69	1	597	0	resolvase family site-specific recombinase [Streptococcus pneumoniae CGSP14]
	Sequence	# Proteins	# Protein Groups	Activation Type	Modifications	Probability	XCorr	Δ Score	Rank	Charge	MH+ [Da]	ΔM [ppm]	First Scan	Last Scan	RT [min]	MSOrder	Ions Matched	Annotation
	EYISQRSDWELADIYADEGISGTqVGKR	1	1	CID	Q24(Deamidated)	20.452	1.76592	0	1	3	3187.49	-23.8436	3652	3652	67.7023	MS2	15/108
gi182684275	1.25	2	2077	0	SNF2 family protein [Streptococcus pneumoniae CGSP14]
	Sequence	# Proteins	# Protein Groups	Activation Type	Modifications	Probability	XCorr	Δ Score	Rank	Charge	MH+ [Da]	ΔM [ppm]	First Scan	Last Scan	RT [min]	MSOrder	Ions Matched	Annotation
	LqHTIDHIKDDQVK	1	1	CID	Q2(Deamidated)	6.4314	0.696539	0	1	2	1690.87	-4.1856	2854	2854	57.557	MS2	6/26
	DIEEFLLMVDSK	1	1	CID		2.47435	0.501974	0	1	2	1438.71	-7.75522	1508	1508	39.4291	MS2	4/22
gi182684352	4.26	5	423	0	hypothetical protein SPCG_1382 [Streptococcus pneumoniae CGSP14]
	Sequence	# Proteins	# Protein Groups	Activation Type	Modifications	Probability	XCorr	Δ Score	Rank	Charge	MH+ [Da]	ΔM [ppm]	First Scan	Last Scan	RT [min]	MSOrder	Ions Matched	Annotation
	ENYLFnYYDnQEGLEDLR	1	1	CID	N6(Deamidated) N10(Deamidated)	3.37754	0.952895	0.28203	2	2	2297.01	21.4458	3127	3127	61.0013	MS2	5/34
	ENYLFnYYDNqEGLEDLR	1	1	CID	N6(Deamidated) Q11(Deamidated)	3.37754	0.920666	0.306313	3	2	2297.01	21.4458	3127	3127	61.0013	MS2	5/34
	ENYLFNYYDnqEGLEDLR	1	1	CID	N10(Deamidated) Q11(Deamidated)	3.37754	0.906171	0.317235	4	2	2297.01	21.4458	3127	3127	61.0013	MS2	5/34
	EnYLFNYYDnQEGLEDLR	1	1	CID	N2(Deamidated) N10(Deamidated)	3.37754	0.810545	0.389286	5	2	2297.01	21.4458	3127	3127	61.0013	MS2	5/34
	EnYLFNYYDNqEGLEDLR	1	1	CID	N2(Deamidated) Q11(Deamidated)	3.37754	0.778316	0.413569	6	2	2297.01	21.4458	3127	3127	61.0013	MS2	5/34
gi182684837	5.31	4	490	0	sucrose phosphorylase [Streptococcus pneumoniae CGSP14]
	Sequence	# Proteins	# Protein Groups	Activation Type	Modifications	Probability	XCorr	Δ Score	Rank	Charge	MH+ [Da]	ΔM [ppm]	First Scan	Last Scan	RT [min]	MSOrder	Ions Matched	Annotation
	YYLMFDFMInHISRQSK	1	1	CID	N10(Deamidated)	3.70378	1.32103	0.17336	2	3	2194.05	6.02984	2374	2374	51.7612	MS2	9/64
	RVMMPIqNK	1	1	CID	Q7(Deamidated)	5.70465	0.779444	0.0371172	3	2	1117.58	-9.6199	100	100	7.38468	MS2	7/16
	RVMMPIQnK	1	1	CID	N8(Deamidated)	5.70465	0.59529	0.264612	6	2	1117.58	-9.6199	100	100	7.38468	MS2	6/16
	VmmPIQNK	1	1	CID	M2(Oxidation) M3(Oxidation)	4.41829	0.415167	0	1	1	992.489	-1.70279	3153	3153	61.3745	MS2	2/14
gi116517169	7.89	4	393	0	hypothetical protein SPD_0846 [Streptococcus pneumoniae D39]
	Sequence	# Proteins	# Protein Groups	Activation Type	Modifications	Probability	XCorr	Δ Score	Rank	Charge	MH+ [Da]	ΔM [ppm]	First Scan	Last Scan	RT [min]	MSOrder	Ions Matched	Annotation
	VINEnEEKLSQMSDTSSEEYQFAKNNLDVqK	1	1	CID	N5(Deamidated) Q30(Deamidated)	9.0831	1.33479	0.278971	5	3	3619.64	-23.1497	3238	3238	62.516	MS2	15/120
	VINENEEKLSqMSDTSSEEYQFAKNNLDVqK	1	1	CID	Q11(Deamidated) Q30(Deamidated)	9.0831	1.27509	0.31122	7	3	3619.64	-23.1497	3238	3238	62.516	MS2	15/120
	VInENEEKLSQMSDTSSEEYQFAKNNLDVqK	1	1	CID	N3(Deamidated) Q30(Deamidated)	9.0831	1.25144	0.323996	8	3	3619.64	-23.1497	3238	3238	62.516	MS2	14/120
	VINEnEEKLSQMSDTSSEEYQFAKnNLDVQK	1	1	CID	N5(Deamidated) N25(Deamidated)	9.0831	1.10334	0.403998	10	3	3619.64	-23.1497	3238	3238	62.516	MS2	15/120
gi116515861	15.76	3	406	0	peptidase T [Streptococcus pneumoniae D39]
	Sequence	# Proteins	# Protein Groups	Activation Type	Modifications	Probability	XCorr	Δ Score	Rank	Charge	MH+ [Da]	ΔM [ppm]	First Scan	Last Scan	RT [min]	MSOrder	Ions Matched	Annotation
	MnEELGSNRVTLNLTDqYYnMK	3	1	CID	N2(Deamidated) Q17(Deamidated) N20(Deamidated)	3.91944	1.27996	0	1	3	2636.19	7.65112	3631	3631	67.4422	MS2	9/84
	SDEHSTTTPSTQSQVDFATNVLIPEMK	5	1	CID		2.79703	0.943561	0.345038	4	3	2963.4	5.9452	2395	2395	52.004	MS2	22/104
	VGFGPDEEIGVGAnK	5	1	CID	N14(Deamidated)	5.53679	0.737457	0.420001	2	2	1489.72	6.3069	2184	2184	49.181	MS2	7/28
gi116515471	3.8	1	368	0	hypothetical protein SPD_0944 [Streptococcus pneumoniae D39]
	Sequence	# Proteins	# Protein Groups	Activation Type	Modifications	Probability	XCorr	Δ Score	Rank	Charge	MH+ [Da]	ΔM [ppm]	First Scan	Last Scan	RT [min]	MSOrder	Ions Matched	Annotation
	IGEGGWNQKSANIK	1	1	CID		10.1032	0.624929	0	1	2	1501.78	-0.0368653	1799	1799	43.7451	MS2	6/26

## Sheet: 5104-8 (2)
Accession #	Coverage	# Peptides	#AAs	Score	Description
gi194397788	56.06	52	701	79.6949	ATP-dependent Clp protease ATP-binding subunit [Streptococcus pneumoniae G54]
	Sequence	# Proteins	# Protein Groups	Activation Type	Modifications	Probability	XCorr	Δ Score	Rank	Charge	MH+ [Da]	ΔM [ppm]	First Scan	Last Scan	RT [min]	MSOrder	Ions Matched	Annotation
	EAGNIILFFDEIHQILGAGSTGGDSGSK	11	2	CID		76.0257	6.66493	0	1	3	2833.4	0.674864	3811	3811	71.4343	MS2	36/108
	AIDLVDVTAAHLAAQHPVTDVHAVER	11	2	CID		109.527	4.81754	0	1	3	2748.44	-1.624	2287	2287	47.6385	MS2	37/100
	ADPQVITLLLQVLDDGRLTDGQGNTVNFK	11	2	CID		136.262	4.70503	0	1	3	3140.66	-3.40268	3863	3863	72.2723	MS2	39/112
	ATGQLPGNAETDVQMPQQASGmK	8	1	CID	M22(Oxidation)	25.4255	4.0285	0	1	3	2375.09	-4.39699	1368	1368	31.3492	MS2	27/88
	AVEAEDFEAALNYK	11	2	CID		75.4851	3.81359	0	1	2	1569.74	-2.67519	2128	2128	44.8442	MS2	21/26
	ADPQVITLLLQVLDDGR	11	2	CID		98.9551	3.43098	0	1	2	1866.03	-0.927139	3919	3919	73.1488	MS2	22/32
	AIDLVDVTAAHLAAQHPVTDVHAVER	11	2	CID		46.4031	3.42751	0	1	4	2748.44	-5.23852	2286	2286	47.6207	MS2	42/150
	LIGTTAGYVGYDDNSNTLTER	11	2	CID		101.839	3.36051	0	1	2	2260.07	-1.2905	1787	1787	38.8896	MS2	23/40
	VTASVNDVAESVER	11	2	CID		87.3515	3.27505	0	1	2	1475.74	1.942	1325	1325	30.5437	MS2	19/26
	IVDLMLAEVNQTLAK	11	2	CID		65.2648	3.18937	0	1	2	1657.92	0.191963	2657	2657	53.9251	MS2	19/28
	DYITEEGYDEVMGVRPLR	11	2	CID		29.1762	3.165	0	1	3	2142.01	-5.23322	2305	2305	47.9509	MS2	24/68
	IVDLmLAEVNQTLAK	11	2	CID	M5(Oxidation)	48.8452	3.10522	0	1	2	1673.92	4.05626	2140	2140	45.055	MS2	18/28
	ATGQLPGNAETDVQmPQQASGMK	8	1	CID	M15(Oxidation)	12.0321	3.09098	0.232721	2	3	2375.09	-4.39699	1368	1368	31.3492	MS2	26/88
	HLEADMEDGVLVIR	9	2	CID		98.5205	3.05657	0	1	2	1596.81	0.23415	2064	2064	43.7258	MS2	17/26
	NKEIISIDISGLEAGTQYR	10	2	CID		13.487	2.64623	0	1	3	2107.1	0.122266	2347	2347	48.6712	MS2	17/72
	EAGNIILFFDEIHQILGAGSTGGDSGSK	11	2	CID		61.4369	2.58632	0	1	2	2833.4	-0.715498	3831	3831	71.756	MS2	15/54
	NKEIQETSEILSR	10	2	CID		31.8242	2.40332	0	1	2	1546.81	-0.258936	1425	1425	32.4444	MS2	13/24
	ATGQLPGNAETDVQMPQQASGMK	8	1	CID		75.4658	2.35696	0	1	2	2359.1	1.27364	1545	1545	34.5565	MS2	17/44
	DYITEEGYDEVMGVRPLRR	11	2	CID		70.4015	2.35264	0	1	3	2298.12	-0.335155	2231	2231	46.6463	MS2	26/72
	ATGQLPGNAETDVQMPQQASGMK	8	1	CID		17.8938	2.14745	0	1	3	2359.1	-4.66021	1502	1502	33.8078	MS2	20/88
	DLYQQHHNVILPDEVLK	11	2	CID		6.6801	2.14532	0	1	4	2061.08	0.615773	2019	2019	42.9331	MS2	28/96
	FNAVIEFSHLTKEDLSK	9	1	CID		12.6509	2.11626	0	1	3	1978.03	-1.63892	2463	2463	50.7243	MS2	23/64
	ATGQLPGNAETDVQMPQQASGMK	8	1	CID		2.95458	2.10324	0	1	3	2359.1	0.83295	246	246	9.7306	MS2	23/88
	HLEADMEDGVLVIR	9	2	CID		7.28758	2.06958	0	1	3	1596.8	-1.12207	1984	1984	42.3178	MS2	20/52
	mTGIPVSQMGASDIER	9	2	CID	M1(Oxidation)	41.2274	1.99952	0	1	2	1707.8	-3.06331	1509	1509	33.936	MS2	13/30
	DIDLVVSQAAK	11	2	CID		45.6657	1.94984	0	1	2	1158.64	-0.751514	1475	1475	33.328	MS2	15/20
	ATGQLPGNAETDVQmPQQASGMK	8	1	CID	M15(Oxidation)	14.7839	1.89145	0	1	3	2375.09	-2.56594	1206	1206	28.3134	MS2	19/88
	HLEADMEDGVLVIR	9	2	CID		48.1614	1.78998	0	1	3	1596.8	-0.755859	2160	2160	45.4127	MS2	18/52
	AVEAEDFEAALNYK	11	2	CID		18.7016	1.65513	0	1	2	1569.74	-3.40761	2429	2429	50.1243	MS2	11/26
	HLEADmEDGVLVIR	9	2	CID	M6(Oxidation)	46.1905	1.64996	0	1	2	1612.8	-1.27265	1680	1680	36.9991	MS2	13/26
	NNPVLVGDAGVGK	23	3	CID		51.5724	1.61862	0	1	2	1239.67	0.229893	219	219	9.20089	MS2	12/24
	GELTVIGATTQDEYRNTILK	11	2	CID		4.94437	1.48365	0	1	3	2222.16	-2.47775	2193	2193	45.9841	MS2	16/76
	ATGQLPGNAETDVQMPQQASGmK	8	1	CID	M22(Oxidation)	14.7839	1.40931	0.254906	2	3	2375.09	-2.56594	1206	1206	28.3134	MS2	17/88
	EIQETSEILSR	10	2	CID		15.1928	1.40211	0	1	2	1304.67	0.0678222	1321	1321	30.4751	MS2	9/20
	NNPVLVGDAGVGK	23	3	CID		25.2308	1.31417	0	1	2	1239.67	-0.6246	898	898	22.4139	MS2	11/24
	NNPVLVGDAGVGK	23	3	CID		3.07421	1.23515	0	1	2	1239.67	-0.136318	537	537	15.4135	MS2	10/24
	EVTPEEFAHYR	9	2	CID		47.945	1.20523	0	1	2	1377.64	-1.75214	1496	1496	33.7048	MS2	7/20
	LDMSEYSDR	11	2	CID		14.9034	1.09373	0	1	2	1115.47	-0.078545	934	934	23.1295	MS2	8/16
	NNPVLVGDAGVGK	23	3	CID		26.5176	1.04804	0	1	2	1239.67	-0.6246	737	737	19.3223	MS2	10/24
	NNPVLVGDAGVGK	23	3	CID		14.3726	1.02888	0	1	2	1239.67	-0.74667	1057	1057	25.4525	MS2	9/24
	MTGIPVSQMGASDIER	9	2	CID		10.1673	1.01686	0	1	2	1691.81	-2.28894	1686	1686	37.099	MS2	9/30
	VVEQEIR	11	2	CID		2.87739	0.979143	0	1	2	872.485	1.01544	1060	1060	25.5072	MS2	7/12
	VVEQEIR	11	2	CID		6.37342	0.957917	0	1	2	872.484	0.588193	850	850	21.4229	MS2	9/12
	MTGIPVSQmGASDIER	9	2	CID	M9(Oxidation)	32.1851	0.947452	0	1	2	1707.8	-7.2137	1344	1344	30.8967	MS2	9/30
	VTDFHLDHLDAK	11	2	CID		5.01519	0.860032	0	1	3	1410.7	0.0973152	1445	1445	32.8095	MS2	9/44
	VNAPSAENTFK	10	2	CID		4.29705	0.858687	0	1	2	1177.58	-0.311045	203	203	8.93678	MS2	6/20
	EIQETSEILSR	10	2	CID		2.05809	0.84063	0	1	2	1304.67	-1.39702	1163	1163	27.4455	MS2	6/20
	VNAPSAENTFK	10	2	CID		5.41925	0.772987	0	1	2	1177.59	2.00829	368	368	12.0473	MS2	7/20
	RNPYSIILLDEIEK	11	2	CID		18.7004	0.73101	0	1	3	1702.94	5.60705	2639	2639	53.6258	MS2	10/52
	VNAPSAENTFK	10	2	CID		10.1666	0.656686	0	1	2	1177.59	2.74071	693	693	18.4256	MS2	6/20
	LDmSEYSDR	11	2	CID	M3(Oxidation)	7.75214	0.605893	0	1	2	1131.46	-1.58534	509	509	14.8801	MS2	4/16
	LTDGQGNTVNFK	11	2	CID		4.69301	0.403843	0	1	2	1293.64	1.53376	216	216	9.14758	MS2	4/22
gi307126729	44.32	45	607	79.4295	chaperone protein DnaK [Streptococcus pneumoniae 670-6B]
	Sequence	# Proteins	# Protein Groups	Activation Type	Modifications	Probability	XCorr	Δ Score	Rank	Charge	MH+ [Da]	ΔM [ppm]	First Scan	Last Scan	RT [min]	MSOrder	Ions Matched	Annotation
	SVNPDEVVAmGAAIQGGVITGDVK	5	1	CID	M10(Oxidation)	75.0615	5.043	0	1	3	2343.19	-0.371132	2116	2116	44.6311	MS2	34/92
	SVNPDEVVAMGAAIQGGVITGDVK	5	1	CID		83.8623	5.01936	0	1	3	2327.19	0.0980672	2575	2575	52.5891	MS2	33/92
	DLGTQKEQTIVIQSNSGLTDEEIDR	5	1	CID		87.0915	4.51397	0	1	3	2789.38	0.282911	1782	1782	38.8034	MS2	35/96
	EYTPQEISAMILQYLK	5	1	CID		32.6928	3.68449	0	1	3	1926.99	1.28377	3566	3566	67.7057	MS2	27/60
	SVNPDEVVAmGAAIQGGVITGDVK	5	1	CID	M10(Oxidation)	90.1555	3.66995	0	1	2	2343.19	1.3513	2110	2110	44.5213	MS2	19/46
	SQVFSTAADNQPAVDIHVLQGERPMAADNK	5	1	CID		74.6783	3.40368	0	1	4	3209.56	-1.43024	2077	2077	43.9539	MS2	38/174
	EQTIVIQSNSGLTDEEIDR	5	1	CID		102.546	3.37286	0	1	2	2147.04	-1.61597	1657	1657	36.5995	MS2	22/36
	IVNEPTAAALAYGLDK	5	1	CID		108.878	3.36955	0	1	2	1645.88	-0.19917	2044	2044	43.3716	MS2	20/30
	SVNPDEVVAMGAAIQGGVITGDVK	5	1	CID		59.8053	3.32921	0	1	2	2327.19	0.416689	2541	2541	52.0354	MS2	22/46
	EYTPQEISAmILQYLK	5	1	CID	M10(Oxidation)	73.0574	3.25914	0	1	2	1942.98	0.461807	3268	3268	63.2507	MS2	20/30
	RKEEVDLRNEVDQAIFATEK	5	1	CID		43.1824	3.25808	0	1	3	2390.23	2.34232	2321	2321	48.2263	MS2	20/76
	VSANGKEYTPQEISAMILQYLK	5	1	CID		14.9434	3.20266	0	1	3	2483.29	5.85744	3326	3326	64.1434	MS2	23/84
	EYTPQEISAMILQYLK	5	1	CID		49.597	3.11969	0	1	2	1926.99	1.84653	3556	3556	67.5495	MS2	17/30
	SQVFSTAADNQPAVDIHVLQGERPmAADNK	5	1	CID	M25(Oxidation)	82.9256	2.88499	0	1	3	3225.55	-5.05982	1992	1992	42.4611	MS2	21/116
	VSANGKEYTPqEISAmILQYLK	5	1	CID	Q11(Deamidated) M16(Oxidation)	18.3367	2.81207	0	1	3	2500.26	-1.76008	3119	3119	60.9958	MS2	22/84
	VSAnGKEYTPQEISAmILQYLK	5	1	CID	N4(Deamidated) M16(Oxidation)	26.765	2.79561	0.00585349	2	3	2500.26	-1.76008	3119	3119	60.9958	MS2	25/84
	IVNEPTAAALAYGLDK	5	1	CID		28.3786	2.67814	0	1	3	1645.88	0.641876	2025	2025	43.0362	MS2	25/60
	IIGIDLGTTNSAVAVLEGTESK	5	1	CID		33.2973	2.66495	0	1	3	2188.17	0.650606	2655	2655	53.8894	MS2	24/84
	SQVFSTAADNQPAVDIHVLQGERPmAADNK	5	1	CID	M25(Oxidation)	9.50218	2.54523	0	1	4	3225.56	-2.44876	1961	1961	41.9194	MS2	32/174
	NEVDQAIFATEK	5	1	CID		26.0589	2.53652	0	1	2	1364.67	0.790244	1587	1587	35.3458	MS2	14/22
	NGEIIVGDAAK	5	1	CID		30.4347	2.42271	0	1	2	1086.58	1.09442	516	516	15.0126	MS2	13/20
	RKEEVDLRNEVDQAIFATEK	5	1	CID		38.0365	2.38101	0	1	4	2390.23	-0.0514925	2335	2335	48.4718	MS2	29/114
	GYAEDYLGEK	5	1	CID		32.0182	2.30068	0	1	2	1144.52	0.55165	1239	1239	28.9409	MS2	12/18
	FQLTDIPAAPR	5	1	CID		21.4376	2.23573	0	1	2	1228.67	-0.12874	1904	1904	40.9454	MS2	13/20
	GYAEDYLGEK	5	1	CID		13.7213	2.23338	0	1	2	1144.52	1.162	242	242	9.64506	MS2	14/18
	NGEIIVGDAAK	5	1	CID		22.6633	2.09729	0	1	2	1086.58	2.55927	206	206	8.98568	MS2	14/20
	NGEIIVGDAAK	5	1	CID		29.0314	2.04229	0	1	2	1086.58	-0.24835	831	831	21.0789	MS2	14/20
	TTPSVVSFKnGEIIVGDAAK	5	1	CID	N10(Deamidated)	26.853	1.72984	0	1	2	2034.08	0.996314	2112	2112	44.5561	MS2	11/38
	DLSGVTSTQISLPFITAGEAGPLHLEmTLTR	5	1	CID	M27(Oxidation)	25.2212	1.72866	0	1	3	3271.69	0.911661	3151	3151	61.4686	MS2	18/120
	IVNEPTAAALAYGLDKTDKEEK	5	1	CID		24.8449	1.48731	0	1	3	2376.23	-1.47187	1903	1903	40.9277	MS2	18/84
	NGEIIVGDAAK	5	1	CID		26.6854	1.44948	0	1	2	1086.58	-0.126279	994	994	24.2213	MS2	11/20
	NGEIIVGDAAK	5	1	CID		20.8745	1.42009	0	1	2	1086.58	-0.24835	671	671	18.0445	MS2	12/20
	ENGIDLSTDK	5	1	CID		17.522	1.37291	0	1	2	1091.52	-5.40042	1203	1203	28.261	MS2	9/18
	NGEIIVGDAAK	5	1	CID		16.8107	1.30274	0	1	2	1086.58	-0.37042	366	366	12.0143	MS2	10/20
	GYAEDYLGEK	5	1	CID		8.86961	1.29221	0	1	2	1144.52	2.26063	1079	1079	25.8556	MS2	9/18
	GIPQIEVTFDIDK	5	1	CID		42.7244	1.2704	0	1	2	1474.78	0.361103	2424	2424	50.045	MS2	10/24
	GYAEDYLGEK	5	1	CID		12.6742	1.24921	0	1	2	1144.52	2.01649	1402	1402	31.9922	MS2	9/18
	ENGIDLSTDK	5	1	CID		9.99771	1.15668	0	1	2	1091.52	-0.395537	879	879	22.0403	MS2	8/18
	TTPSVVSFKnGEIIVGDAAK	5	1	CID	N10(Deamidated)	12.2304	1.15615	0	1	3	2034.07	-2.4351	2129	2129	44.8607	MS2	16/76
	LGGDDFDQK	5	1	CID		13.5148	1.08427	0	1	2	994.446	-1.2736	624	624	17.1755	MS2	8/16
	LGGDDFDQK	5	1	CID		7.27971	1.06864	0	1	2	994.447	-0.663252	467	467	14.1252	MS2	8/16
	LGGDDFDQK	5	1	CID		20.1861	1.06469	0	1	2	994.447	-0.602217	782	782	20.1983	MS2	7/16
	ENGIDLSTDK	5	1	CID		18.5345	0.888286	0	1	2	1091.52	-1.00589	720	720	19.0016	MS2	7/18
	LGGDDFDQK	5	1	CID		6.84025	0.63294	0.0695019	2	2	994.45	1.90022	1113	1113	26.5065	MS2	9/16
	TTPSVVSFK	5	1	CID		15.6308	0.418478	0	1	2	965.53	-0.24544	1154	1154	27.2878	MS2	5/16
gi169833795	57.06	47	701	73.117	ATP-dependent Clp protease ATP-binding subunit ClpL [Streptococcus pneumoniae Hungary19A-6]
	Sequence	# Proteins	# Protein Groups	Activation Type	Modifications	Probability	XCorr	Δ Score	Rank	Charge	MH+ [Da]	ΔM [ppm]	First Scan	Last Scan	RT [min]	MSOrder	Ions Matched	Annotation
	EAGNIILFFDEIHQILGAGSTGGDSGSK	11	2	CID		76.0257	6.66493	0	1	3	2833.4	0.674864	3811	3811	71.4343	MS2	36/108
	AIDLVDVTAAHLAAQHPVTDVHAVER	11	2	CID		109.527	4.81754	0	1	3	2748.44	-1.624	2287	2287	47.6385	MS2	37/100
	ADPQVITLLLQVLDDGRLTDGQGNTVNFK	11	2	CID		136.262	4.70503	0	1	3	3140.66	-3.40268	3863	3863	72.2723	MS2	39/112
	NTVVIATSNAGFGYEANLTEDADKPELMDR	1	1	CID		87.762	4.05827	0	1	3	3241.54	5.03912	2298	2298	47.8232	MS2	26/116
	AVEAEDFEAALNYK	11	2	CID		75.4851	3.81359	0	1	2	1569.74	-2.67519	2128	2128	44.8442	MS2	21/26
	ADPQVITLLLQVLDDGR	11	2	CID		98.9551	3.43098	0	1	2	1866.03	-0.927139	3919	3919	73.1488	MS2	22/32
	AIDLVDVTAAHLAAQHPVTDVHAVER	11	2	CID		46.4031	3.42751	0	1	4	2748.44	-5.23852	2286	2286	47.6207	MS2	42/150
	LIGTTAGYVGYDDNSNTLTER	11	2	CID		101.839	3.36051	0	1	2	2260.07	-1.2905	1787	1787	38.8896	MS2	23/40
	VTASVNDVAESVER	11	2	CID		87.3515	3.27505	0	1	2	1475.74	1.942	1325	1325	30.5437	MS2	19/26
	IVDLMLAEVNQTLAK	11	2	CID		65.2648	3.18937	0	1	2	1657.92	0.191963	2657	2657	53.9251	MS2	19/28
	DYITEEGYDEVMGVRPLR	11	2	CID		29.1762	3.165	0	1	3	2142.01	-5.23322	2305	2305	47.9509	MS2	24/68
	IVDLmLAEVNQTLAK	11	2	CID	M5(Oxidation)	48.8452	3.10522	0	1	2	1673.92	4.05626	2140	2140	45.055	MS2	18/28
	HLEADMEDGVLVIR	9	2	CID		98.5205	3.05657	0	1	2	1596.81	0.23415	2064	2064	43.7258	MS2	17/26
	NKEIISIDISGLEAGTQYR	10	2	CID		13.487	2.64623	0	1	3	2107.1	0.122266	2347	2347	48.6712	MS2	17/72
	EAGNIILFFDEIHQILGAGSTGGDSGSK	11	2	CID		61.4369	2.58632	0	1	2	2833.4	-0.715498	3831	3831	71.756	MS2	15/54
	NKEIQETSEILSR	10	2	CID		31.8242	2.40332	0	1	2	1546.81	-0.258936	1425	1425	32.4444	MS2	13/24
	DYITEEGYDEVMGVRPLRR	11	2	CID		70.4015	2.35264	0	1	3	2298.12	-0.335155	2231	2231	46.6463	MS2	26/72
	DLYQQHHNVILPDEVLK	11	2	CID		6.6801	2.14532	0	1	4	2061.08	0.615773	2019	2019	42.9331	MS2	28/96
	FNAVIEFSHLTKEnLSK	1	1	CID	N14(Deamidated)	12.6509	2.11626	0	2	3	1978.03	-1.63493	2463	2463	50.7243	MS2	23/64
	HLEADMEDGVLVIR	9	2	CID		7.28758	2.06958	0	1	3	1596.8	-1.12207	1984	1984	42.3178	MS2	20/52
	mTGIPVSQMGASDIER	9	2	CID	M1(Oxidation)	41.2274	1.99952	0	1	2	1707.8	-3.06331	1509	1509	33.936	MS2	13/30
	DIDLVVSQAAK	11	2	CID		45.6657	1.94984	0	1	2	1158.64	-0.751514	1475	1475	33.328	MS2	15/20
	HLEADMEDGVLVIR	9	2	CID		48.1614	1.78998	0	1	3	1596.8	-0.755859	2160	2160	45.4127	MS2	18/52
	FnAVIEFSHLTKENLSK	1	1	CID	N2(Deamidated)	6.01251	1.77409	0.161686	3	3	1978.03	-1.63493	2463	2463	50.7243	MS2	24/64
	AVEAEDFEAALNYK	11	2	CID		18.7016	1.65513	0	1	2	1569.74	-3.40761	2429	2429	50.1243	MS2	11/26
	HLEADmEDGVLVIR	9	2	CID	M6(Oxidation)	46.1905	1.64996	0	1	2	1612.8	-1.27265	1680	1680	36.9991	MS2	13/26
	NNPVLVGDAGVGK	23	3	CID		51.5724	1.61862	0	1	2	1239.67	0.229893	219	219	9.20089	MS2	12/24
	GELTVIGATTQDEYRNTILK	11	2	CID		4.94437	1.48365	0	1	3	2222.16	-2.47775	2193	2193	45.9841	MS2	16/76
	EIQETSEILSR	10	2	CID		15.1928	1.40211	0	1	2	1304.67	0.0678222	1321	1321	30.4751	MS2	9/20
	NNPVLVGDAGVGK	23	3	CID		25.2308	1.31417	0	1	2	1239.67	-0.6246	898	898	22.4139	MS2	11/24
	NNPVLVGDAGVGK	23	3	CID		3.07421	1.23515	0	1	2	1239.67	-0.136318	537	537	15.4135	MS2	10/24
	EVTPEEFAHYR	9	2	CID		47.945	1.20523	0	1	2	1377.64	-1.75214	1496	1496	33.7048	MS2	7/20
	LDMSEYSDR	11	2	CID		14.9034	1.09373	0	1	2	1115.47	-0.078545	934	934	23.1295	MS2	8/16
	NNPVLVGDAGVGK	23	3	CID		26.5176	1.04804	0	1	2	1239.67	-0.6246	737	737	19.3223	MS2	10/24
	NNPVLVGDAGVGK	23	3	CID		14.3726	1.02888	0	1	2	1239.67	-0.74667	1057	1057	25.4525	MS2	9/24
	MTGIPVSQMGASDIER	9	2	CID		10.1673	1.01686	0	1	2	1691.81	-2.28894	1686	1686	37.099	MS2	9/30
	VVEQEIR	11	2	CID		2.87739	0.979143	0	1	2	872.485	1.01544	1060	1060	25.5072	MS2	7/12
	VVEQEIR	11	2	CID		6.37342	0.957917	0	1	2	872.484	0.588193	850	850	21.4229	MS2	9/12
	MTGIPVSQmGASDIER	9	2	CID	M9(Oxidation)	32.1851	0.947452	0	1	2	1707.8	-7.2137	1344	1344	30.8967	MS2	9/30
	VTDFHLDHLDAK	11	2	CID		5.01519	0.860032	0	1	3	1410.7	0.0973152	1445	1445	32.8095	MS2	9/44
	VNAPSAENTFK	10	2	CID		4.29705	0.858687	0	1	2	1177.58	-0.311045	203	203	8.93678	MS2	6/20
	EIQETSEILSR	10	2	CID		2.05809	0.84063	0	1	2	1304.67	-1.39702	1163	1163	27.4455	MS2	6/20
	VNAPSAENTFK	10	2	CID		5.41925	0.772987	0	1	2	1177.59	2.00829	368	368	12.0473	MS2	7/20
	RNPYSIILLDEIEK	11	2	CID		18.7004	0.73101	0	1	3	1702.94	5.60705	2639	2639	53.6258	MS2	10/52
	VNAPSAENTFK	10	2	CID		10.1666	0.656686	0	1	2	1177.59	2.74071	693	693	18.4256	MS2	6/20
	LDmSEYSDR	11	2	CID	M3(Oxidation)	7.75214	0.605893	0	1	2	1131.46	-1.58534	509	509	14.8801	MS2	4/16
	LTDGQGNTVNFK	11	2	CID		4.69301	0.403843	0	1	2	1293.64	1.53376	216	216	9.14758	MS2	4/22
gi307067048	48.01	24	427	72.2142	FKBP-type peptidyl-prolyl cis-trans isomerase [Streptococcus pneumoniae AP200]
	Sequence	# Proteins	# Protein Groups	Activation Type	Modifications	Probability	XCorr	Δ Score	Rank	Charge	MH+ [Da]	ΔM [ppm]	First Scan	Last Scan	RT [min]	MSOrder	Ions Matched	Annotation
	ELAAAKEEAYKDAVEGAAIDTAVENAEIVELPEEMIHEEVHR	6	1	CID		136.945	6.81514	0	1	4	4619.24	-3.18274	3312	3312	63.9294	MS2	51/246
	ELAAAKEEAYKDAVEGAAIDTAVENAEIVELPEEmIHEEVHR	6	1	CID	M35(Oxidation)	102.309	5.96409	0	1	4	4635.25	5.32023	2883	2883	57.3997	MS2	42/246
	QGINPDMYFQITGTTQEDLHNQYQAEAESR	9	1	CID		122.605	5.82567	0	1	3	3484.57	-1.5681	2442	2442	50.3579	MS2	29/116
	AKEVPALDDELAKDIDEEVETLADLKEK	9	1	CID		143.635	5.28685	0	1	4	3126.59	-1.27509	3272	3272	63.3069	MS2	43/162
	EVPALDDELAKDIDEEVETLADLKEK	9	1	CID		132.166	4.62648	0	1	3	2927.46	-1.37379	3420	3420	65.5182	MS2	32/100
	ELAAAKEEAYKDAVEGAAIDTAVENAEIVELPEEMIHEEVHR	6	1	CID		58.2252	4.62465	0	1	5	4619.25	-0.266501	3302	3302	63.7664	MS2	52/328
	NLEVSVDVEKEVTDADVEER	9	1	CID		52.1017	4.01277	0	1	3	2275.09	-1.14785	2073	2073	43.8834	MS2	28/76
	AKEVPALDDELAKDIDEEVETLADLK	9	1	CID		23.6545	3.63684	0	1	4	2869.46	0.552726	3498	3498	66.6731	MS2	35/150
	EEAYKDAVEGAAIDTAVENAEIVELPEEMIHEEVHR	8	1	CID		33.2664	3.56612	0	1	5	4035.91	1.12949	3167	3167	61.7167	MS2	49/280
	ELAAAKEEAYKDAVEGAAIDTAVENAEIVELPEEmIHEEVHR	6	1	CID	M35(Oxidation)	54.2437	3.33431	0	1	5	4635.24	-0.00327875	2871	2871	57.2262	MS2	45/328
	DAVEGAAIDTAVENAEIVELPEEmIHEEVHR	9	1	CID	M24(Oxidation)	24.4404	3.15454	0	1	4	3431.61	-13.6381	2626	2626	53.4116	MS2	34/180
	EEAYKDAVEGAAIDTAVENAEIVELPEEMIHEEVHR	8	1	CID		25.7939	3.01402	0	1	4	4035.92	3.1571	3157	3157	61.5623	MS2	37/210
	GQDWVIAAEVVTKPEVK	3	1	CID		73.8472	2.99956	0	1	2	1869.01	1.12368	2223	2223	46.5056	MS2	17/32
	FGEESLYQDVMNALLPNAYEAAVK	6	1	CID		7.2959	2.98482	0	1	3	2672.3	8.59961	3662	3662	69.1463	MS2	20/92
	KFGEESLYQDVMNALLPNAYEAAVK	5	1	CID		3.64827	2.79913	0	1	3	2800.38	-1.71463	3541	3541	67.3321	MS2	18/96
	GQDWVIAAEVVTKPEVK	3	1	CID		33.0985	2.77471	0	1	3	1869.01	-0.415644	2242	2242	46.8409	MS2	28/64
	DIDEEVETLADLK	9	1	CID		28.3031	2.77187	0	1	2	1489.73	-1.74604	2448	2448	50.4621	MS2	16/24
	SVNEFLGNLQR	9	1	CID		35.4982	2.30423	0	1	2	1276.66	-1.5919	1960	1960	41.9037	MS2	12/20
	NNLAELVIK	9	1	CID		10.995	1.71843	0	1	2	1013.6	0.574639	1844	1844	39.8944	MS2	11/16
	TNLVIEAVAK	9	1	CID		23.2237	1.5655	0	1	2	1057.63	0.904932	1609	1609	35.7476	MS2	12/18
	FGEESLYQDVMNALLPNAYEAAVK	6	1	CID		33.3904	1.20974	0	1	2	2672.29	-0.542217	3666	3666	69.2083	MS2	11/46
	EEAYKDAVEGAAIDTAVENAEIVELPEEMIHEEVHR	8	1	CID		52.3341	0.941698	0	1	3	4035.91	1.40053	3184	3184	61.9776	MS2	35/140
	EAGLEVVAQPK	9	1	CID		13.9899	0.756372	0	1	2	1140.63	0.0428612	916	916	22.7614	MS2	5/20
	ERNNLAELVIK	9	1	CID		6.63125	0.571695	0.370379	3	2	1298.74	-1.48276	1783	1783	38.8212	MS2	7/20
gi307128212	51.04	42	335	67.2469	glyceraldehyde-3-phosphate dehydrogenase, type I [Streptococcus pneumoniae 670-6B]
	Sequence	# Proteins	# Protein Groups	Activation Type	Modifications	Probability	XCorr	Δ Score	Rank	Charge	MH+ [Da]	ΔM [ppm]	First Scan	Last Scan	RT [min]	MSOrder	Ions Matched	Annotation
	AASNESYGYTEDPIVSSDIVGmSYGSLFDATQTK	6	1	CID	M22(Oxidation)	156.536	6.77157	0	1	3	3619.63	-0.660409	2641	2641	53.6565	MS2	46/132
	ALQDNFGVVEGLMTTIHAYTGDQmILDGPHR	6	1	CID	M24(Oxidation)	65.0733	5.55049	0	1	3	3415.65	8.29088	3476	3476	66.3509	MS2	34/120
	AASNESYGYTEDPIVSSDIVGMSYGSLFDATQTK	6	1	CID		70.1889	4.69373	0	1	3	3603.63	1.82295	2913	2913	57.8428	MS2	32/132
	ALQDNFGVVEGLMTTIHAYTGDQmILDGPHR	6	1	CID	M24(Oxidation)	120.762	4.28579	0	1	4	3415.64	1.6246	3494	3494	66.6116	MS2	45/180
	ALQDNFGVVEGLmTTIHAYTGDQMILDGPHR	6	1	CID	M13(Oxidation)	45.4669	3.84769	0.306784	2	3	3415.65	8.29088	3476	3476	66.3509	MS2	24/120
	ALQDNFGVVEGLmTTIHAYTGDQMILDGPHR	6	1	CID	M13(Oxidation)	64.8837	3.79729	0	1	3	3415.64	0.234239	3068	3068	60.2058	MS2	33/120
	ALQDNFGVVEGLMTTIHAYTGDQMILDGPHR	6	1	CID		108.465	3.74366	0	1	3	3399.65	2.7176	3598	3598	68.173	MS2	30/120
	ALQDNFGVVEGLmTTIHAYTGDQMILDGPHR	6	1	CID	M13(Oxidation)	54.0631	3.3789	0.211605	2	4	3415.64	1.6246	3494	3494	66.6116	MS2	32/180
	ALQDNFGVVEGLmTTIHAYTGDQMILDGPHR	6	1	CID	M13(Oxidation)	11.5061	3.27506	0	1	4	3415.64	-0.328524	3076	3076	60.3266	MS2	33/180
	VPTPTGSVTELVAVLEK	6	1	CID		71.9392	3.22641	0	1	2	1739.98	1.36298	2881	2881	57.3726	MS2	21/32
	ALQDNFGVVEGLMTTIHAYTGDQMILDGPHR	6	1	CID		40.8769	3.20535	0	1	5	3399.64	-1.27658	3613	3613	68.3969	MS2	45/240
	ALQDNFGVVEGLmTTIHAYTGDQmILDGPHR	6	1	CID	M13(Oxidation) M24(Oxidation)	53.1355	3.19771	0	1	4	3431.64	1.58265	2937	2937	58.2274	MS2	37/180
	AASNESYGYTEDPIVSSDIVGmSYGSLFDATQTK	6	1	CID	M22(Oxidation)	34.0206	3.03448	0	1	4	3619.63	0.852023	2660	2660	53.9731	MS2	41/198
	NVTVDEVNAAMK	6	1	CID		62.856	2.90217	0	1	2	1290.64	-0.477725	1358	1358	31.1815	MS2	18/22
	INDLTDPVMLAHLLK	6	1	CID		39.0022	2.43866	0	1	3	1692.94	0.250762	2692	2692	54.475	MS2	16/56
	ALQDNFGVVEGLMTTIHAYTGDQmILDGPHR	6	1	CID	M24(Oxidation)	64.8837	2.30314	0.39348	2	3	3415.64	0.234239	3068	3068	60.2058	MS2	27/120
	NVTVDEVNAAmK	6	1	CID	M11(Oxidation)	26.3952	2.19572	0	1	2	1306.63	0.456885	356	356	11.8421	MS2	13/22
	AIGLVIPELnGKLDGSAQR	6	1	CID	N10(Deamidated)	37.4555	2.17364	0	1	3	1952.08	-1.35916	2445	2445	50.4107	MS2	18/72
	ALQDNFGVVEGLMTTIHAYTGDQmILDGPHR	6	1	CID	M24(Oxidation)	5.69614	2.13215	0.348975	2	4	3415.64	-0.328524	3076	3076	60.3266	MS2	28/180
	AGAANIVPNSTGAAK	6	1	CID		10.9502	2.09379	0	1	2	1341.71	0.512783	660	660	17.8517	MS2	15/28
	AIGLVIPELnGKLDGSAQR	6	1	CID	N10(Deamidated)	65.447	1.90193	0	1	2	1952.08	-0.247084	2337	2337	48.5032	MS2	13/36
	VVSWYDNEMSYTAQLVR	6	1	CID		21.5946	1.8661	0	1	2	2060.97	-0.990889	2492	2492	51.2183	MS2	11/32
	NVTVDEVNAAmK	6	1	CID	M11(Oxidation)	25.061	1.84867	0	1	2	1306.63	1.06724	194	194	8.78589	MS2	11/22
	INDLTDPVmLAHLLK	6	1	CID	M9(Oxidation)	18.2923	1.74497	0	1	3	1708.93	-0.218437	2476	2476	50.9501	MS2	14/56
	AGAANIVPNSTGAAK	6	1	CID		28.7396	1.73547	0	1	2	1341.71	-2.29483	351	351	11.7647	MS2	12/28
	AIGLVIPELNGKLDGSAqR	6	1	CID	Q18(Deamidated)	42.1943	1.68617	0.113444	2	2	1952.08	-0.247084	2337	2337	48.5032	MS2	13/36
	VPTPTGSVTELVAVLEK	6	1	CID		12.7634	1.68248	0	1	3	1739.98	0.61711	2945	2945	58.354	MS2	17/64
	AGAANIVPNSTGAAK	6	1	CID		23.0003	1.68216	0	1	2	1341.71	-0.0975684	193	193	8.77001	MS2	11/28
	AGAANIVPNSTGAAK	6	1	CID		27.9645	1.62701	0	1	2	1341.71	-0.0975684	504	504	14.8025	MS2	12/28
	AGAANIVPNSTGAAK	6	1	CID		45.0722	1.57498	0	1	2	1341.71	1.12313	978	978	23.9455	MS2	10/28
	NVTVDEVNAAmK	6	1	CID	M11(Oxidation)	6.26411	1.54147	0	1	2	1306.63	-0.0313966	507	507	14.849	MS2	10/22
	AIGLVIPELNGKLDGSAqR	6	1	CID	Q18(Deamidated)	11.417	1.51345	0.303729	2	3	1952.08	-1.35916	2445	2445	50.4107	MS2	15/72
	NVTVDEVNAAmK	6	1	CID	M11(Oxidation)	24.7968	1.50173	0	1	2	1306.63	0.0906738	663	663	17.8964	MS2	10/22
	IQNVEGVEVTR	6	1	CID		48.9278	1.475	0	1	2	1243.66	-0.163272	205	205	8.96979	MS2	9/20
	IQNVEGVEVTR	6	1	CID		35.5372	1.41667	0	1	2	1243.67	1.1795	687	687	18.3301	MS2	10/20
	AGAANIVPNSTGAAK	6	1	CID		11.1715	1.34852	0	1	2	1341.71	-0.219639	820	820	20.8949	MS2	8/28
	NVTVDEVNAAmK	6	1	CID	M11(Oxidation)	15.0761	1.26436	0	1	2	1306.63	-0.153467	823	823	20.9424	MS2	8/22
	IQNVEGVEVTR	6	1	CID		6.05397	1.17992	0	1	2	1243.66	0.56915	528	528	15.2372	MS2	9/20
	IQNVEGVEVTR	6	1	CID		22.488	1.14154	0	1	2	1243.66	-0.285342	851	851	21.4376	MS2	9/20
	NVTVDEVNAAMK	6	1	CID		16.4124	0.90676	0	1	2	1290.63	-1.8205	1197	1197	28.1547	MS2	6/22
	AGAANIVPNSTGAAK	6	1	CID		9.73574	0.772785	0	1	2	1341.71	1.85556	1249	1249	29.14	MS2	5/28
	NVTVDEVNAAMK	6	1	CID		10.7715	0.66565	0.0544804	2	2	1290.63	-0.966006	400	400	12.6809	MS2	5/22
gi225858121	41.56	26	693	52.1543	elongation factor G [Streptococcus pneumoniae 70585]
	Sequence	# Proteins	# Protein Groups	Activation Type	Modifications	Probability	XCorr	Δ Score	Rank	Charge	MH+ [Da]	ΔM [ppm]	First Scan	Last Scan	RT [min]	MSOrder	Ions Matched	Annotation
	MKAEIYTNDLGTDILEEDIPAEYLDQAQEYR	6	1	CID		85.469	6.68098	0	1	3	3646.71	-0.116894	2889	2889	57.4927	MS2	40/120
	AEIYTNDLGTDILEEDIPAEYLDQAQEYR	6	1	CID		85.8978	5.20528	0	1	3	3387.58	0.831622	2921	2921	57.9722	MS2	32/112
	IGETHEGASQMDWMEQEQER	6	1	CID		45.3685	4.41872	0	1	3	2391	-1.22719	1665	1665	36.735	MS2	25/76
	IILESINVPEPVIQLmVEPK	6	1	CID	M16(Oxidation)	58.106	4.22469	0	1	3	2277.28	-1.27703	2683	2683	54.3267	MS2	36/76
	LIEAVAETDEELmmK	3	1	CID	M13(Oxidation) M14(Oxidation)	92.9535	3.87329	0	1	2	1753.82	-1.9605	1877	1877	40.4651	MS2	21/28
	QEIDTVYSGDIAAAVGLK	5	1	CID		75.9307	3.63165	0	1	2	1849.95	-0.61042	2381	2381	49.2796	MS2	21/34
	YLEGEEITNEELK	6	1	CID		78.9077	3.53682	0	1	2	1566.75	-2.39714	1534	1534	34.3693	MS2	20/24
	LIEAVAETDEELMMK	3	1	CID		49.6079	3.03117	0	1	2	1721.84	3.00622	2244	2244	46.876	MS2	20/28
	IILESINVPEPVIQLmVEPK	6	1	CID	M16(Oxidation)	88.3963	2.95224	0	1	2	2277.28	0.0791894	2684	2684	54.3447	MS2	20/38
	GFEFENAIVGGVVPR	6	1	CID		36.6606	2.71611	0	1	2	1590.83	-1.95218	2489	2489	51.1643	MS2	14/28
	GQFGDVWIEFTPNEEGK	6	1	CID		42.802	2.69088	0	1	2	1952.9	0.4204	2556	2556	52.287	MS2	10/32
	IILESINVPEPVIQLMVEPK	6	1	CID		17.7237	2.51543	0	1	2	2261.28	-0.85542	3133	3133	61.203	MS2	15/38
	EKLIEAVAETDEELmMK	3	1	CID	M15(Oxidation)	5.31727	2.39854	0	1	3	1994.96	-1.19633	2472	2472	50.8812	MS2	20/64
	EKLIEAVAETDEELMmK	3	1	CID	M16(Oxidation)	5.31727	2.1979	0.0836487	2	3	1994.96	-1.19633	2472	2472	50.8812	MS2	20/64
	EKLIEAVAETDEELMMK	3	1	CID		21.0271	2.16654	0	1	3	1978.97	-1.27644	2706	2706	54.6888	MS2	21/64
	GINPDTDAEEIRPASDEEPFAALAFK	1	1	CID		14.251	2.11199	0	1	3	2803.33	-7.25621	2462	2462	50.7068	MS2	25/100
	IGETHEGASQMDWmEQEQER	6	1	CID	M14(Oxidation)	33.5867	1.97779	0	1	3	2406.99	-4.25986	1282	1282	29.7511	MS2	22/76
	LQANAHPIQLPIGSEDDFRGIIDLIK	6	1	CID		7.02589	1.92951	0	1	4	2873.55	1.98655	3110	3110	60.8565	MS2	31/150
	SAQPAILEPmmLVTITVPEENLGDVMGHVTAR	6	1	CID	M10(Oxidation) M11(Oxidation)	14.1644	1.85943	0	1	3	3451.74	9.00787	2854	2854	56.9714	MS2	13/124
	SAQPAILEPmMLVTITVPEENLGDVMGHVTAR	6	1	CID	M10(Oxidation)	20.2024	1.50002	0	1	3	3435.74	8.19533	3114	3114	60.9193	MS2	16/124
	SAQPAILEPMmLVTITVPEENLGDVMGHVTAR	6	1	CID	M11(Oxidation)	20.2024	1.49509	0.0032883	2	3	3435.74	8.19533	3114	3114	60.9193	MS2	16/124
	SAQPAILEPMMLVTITVPEENLGDVmGHVTAR	6	1	CID	M26(Oxidation)	12.0088	1.45664	0.0289204	3	3	3435.74	8.19533	3114	3114	60.9193	MS2	15/124
	QEIDTVYSGDIAAAVGLKDTTTGDSLTDEK	5	1	CID		34.0794	1.41285	0	1	3	3113.5	-4.54822	2380	2380	49.2622	MS2	18/116
	VLDGAVTVLDSQSGVEPQTETVWR	6	1	CID		30.8981	1.30711	0	1	2	2586.31	1.73278	2338	2338	48.5208	MS2	13/46
	IGETHEGASQmDWMEQEQER	6	1	CID	M11(Oxidation)	16.1094	1.27237	0.356674	2	3	2406.99	-4.25986	1282	1282	29.7511	MS2	18/76
	LYDGSYHDVDSSETAFK	6	1	CID		2.397	0.483783	0	1	3	1933.85	0.0456258	243	243	9.66048	MS2	8/64
gi307067830	29.97	15	574	45.069	PTS system phosphoenolpyruvate-protein kinase [Streptococcus pneumoniae AP200]
	Sequence	# Proteins	# Protein Groups	Activation Type	Modifications	Probability	XCorr	Δ Score	Rank	Charge	MH+ [Da]	ΔM [ppm]	First Scan	Last Scan	RT [min]	MSOrder	Ions Matched	Annotation
	AVGTLGEEAAQVFDAHLMVLADPEmISQIK	5	1	CID	M25(Oxidation)	109.53	5.73879	0	1	3	3199.6	0.599669	3560	3560	67.6102	MS2	37/116
	AVGTLGEEAAQVFDAHLmVLADPEMISQIK	5	1	CID	M18(Oxidation)	63.8471	5.65442	0.0147019	2	3	3199.6	0.599669	3560	3560	67.6102	MS2	36/116
	AYLLVQPDLSFETITVEDTNAEEAR	5	1	CID		84.2943	5.20161	0	1	3	2824.39	0.72922	2761	2761	55.5337	MS2	40/96
	LPNPASINEEVIVIAHDLTPSDTAQLDKNFVK	6	1	CID		81.6376	4.81211	0	1	4	3488.82	-7.57845	3370	3370	64.7682	MS2	39/186
	AVGTLGEEAAQVFDAHLMVLADPEMISQIK	5	1	CID		120.29	4.56157	0	1	3	3183.6	-2.41014	3776	3776	70.8828	MS2	34/116
	LDAALQASQDELSVIR	5	1	CID		65.4286	3.35758	0	1	2	1728.91	0.0260253	2042	2042	43.3304	MS2	18/30
	AVGTLGEEAAQVFDAHLMVLADPEMISQIK	5	1	CID		16.0423	3.10961	0	1	4	3183.61	-0.0432112	3746	3746	70.4208	MS2	34/174
	HFELAANIGTPK	6	1	CID		37.1161	2.97138	0	1	2	1297.69	-1.32507	1592	1592	35.4304	MS2	17/22
	TMDIGGDKELPYFDMPHEMNPFLGFR	6	1	CID		110.385	2.76405	0	1	3	3057.39	-7.45322	3060	3060	60.0907	MS2	25/100
	TmDIGGDKELPYFDmPHEMNPFLGFR	6	1	CID	M2(Oxidation) M15(Oxidation)	4.97383	2.75426	0	1	4	3089.38	-1.38602	2729	2729	55.035	MS2	28/150
	TMDIGGDKELPYFDMPHEMNPFLGFR	6	1	CID		29.8238	2.73658	0	1	4	3057.39	-2.27868	3053	3053	59.9803	MS2	37/150
	TMDIGGDKELPYFDmPHEMNPFLGFR	6	1	CID	M15(Oxidation)	47.9687	2.67877	0	1	4	3073.39	0.609054	2830	2830	56.6026	MS2	28/150
	TMDIGGDKELPYFDMPHEmNPFLGFR	6	1	CID	M19(Oxidation)	47.9687	2.65508	0.00884342	2	4	3073.39	0.609054	2830	2830	56.6026	MS2	27/150
	DVEGVNNNGAEAVGLYR	6	1	CID		20.0801	1.70965	0	1	2	1776.85	-0.933975	1580	1580	35.2166	MS2	14/32
	AVLEGMnGKPVVVR	6	1	CID	N7(Deamidated)	6.19225	1.29045	0	1	3	1469.81	-5.9294	1421	1421	32.3652	MS2	13/52
gi307126916	26.57	13	591	44.5876	pyruvate oxidase [Streptococcus pneumoniae 670-6B]
	Sequence	# Proteins	# Protein Groups	Activation Type	Modifications	Probability	XCorr	Δ Score	Rank	Charge	MH+ [Da]	ΔM [ppm]	First Scan	Last Scan	RT [min]	MSOrder	Ions Matched	Annotation
	IAEAQGAVGFTVDRIEDIDAVVAEAVK	4	1	CID		139.376	7.40575	0	1	3	2786.46	0.566524	3529	3529	67.1447	MS2	45/104
	KGPAVVEIPVNFGFQEIDENSYYGSGSYER	4	1	CID		141.417	6.78695	0	1	3	3351.58	0.964786	2689	2689	54.4223	MS2	40/116
	NFEAFEWNYEGLTGSAYR	4	1	CID		150.003	5.96071	0	1	2	2153.95	-2.96456	2624	2624	53.3769	MS2	28/34
	GPAVVEIPVNFGFQEIDENSYYGSGSYER	4	1	CID		25.2572	4.11341	0	1	3	3223.49	2.30686	2833	2833	56.6459	MS2	33/112
	AVEILNNAERPVIYAGFGGVK	4	1	CID		57.8229	3.89353	0	1	3	2217.2	-0.619745	2324	2324	48.286	MS2	30/80
	SFIAPALNEVEIDKAVEILNNAERPVIYAGFGGVK	4	1	CID		146.122	3.62595	0	1	4	3744	-1.2268	3620	3620	68.502	MS2	52/204
	SFIAPALNEVEIDKAVEILNNAERPVIYAGFGGVK	4	1	CID		77.6951	3.28725	0	1	3	3744	-1.6406	3635	3635	68.7281	MS2	29/136
	IAEAQGAVGFTVDRIEDIDAVVAEAVK	4	1	CID		26.449	2.83092	0	1	4	2786.46	1.16343	3507	3507	66.8067	MS2	38/156
	HADQDAIYSIDVGNTTQTSTR	4	1	CID		24.1441	2.59975	0	1	3	2293.07	-0.604667	1504	1504	33.8499	MS2	23/80
	TEGELQLYQVYNAINK	4	1	CID		7.25391	2.42525	0	1	3	1882.95	-0.862831	2394	2394	49.5101	MS2	22/60
	YEAEELVPFR	4	1	CID		28.3806	1.65814	0	1	2	1252.62	-0.716514	2040	2040	43.3013	MS2	11/18
	SFIAPALNEVEIDK	4	1	CID		9.61521	1.09638	0	1	2	1545.81	-4.04405	2185	2185	45.8498	MS2	9/26
	IAEAQGAVGFTVDR	4	1	CID		23.8878	0.91747	0	1	2	1433.74	-2.63593	1431	1431	32.5425	MS2	10/26
gi307067282	15.95	18	1887	38.5544	hypothetical protein SPAP_0653 [Streptococcus pneumoniae AP200]
	Sequence	# Proteins	# Protein Groups	Activation Type	Modifications	Probability	XCorr	Δ Score	Rank	Charge	MH+ [Da]	ΔM [ppm]	First Scan	Last Scan	RT [min]	MSOrder	Ions Matched	Annotation
	DRADLISAIEGILSPIELQSDPIYQR	2	1	CID		116.189	5.07391	0	1	3	2912.53	-5.47129	3851	3851	72.0831	MS2	37/100
	LAITNIEEVTEEETSLFK	2	1	CID		104.482	4.31889	0	1	2	2066.05	-0.0486231	2952	2952	58.4656	MS2	26/34
	NYNEAMMmLDYAEAEAVLPK	2	1	CID	M8(Oxidation)	80.9709	4.12214	0	1	2	2319.03	-2.74456	2647	2647	53.7575	MS2	21/38
	NYNEAMMMLDYAEAEAVLPK	2	1	CID		116.925	4.04728	0	1	2	2303.04	-3.19089	3092	3092	60.5795	MS2	17/38
	NYNEAMmMLDYAEAEAVLPK	2	1	CID	M7(Oxidation)	68.2622	3.72742	0.0957544	2	2	2319.03	-2.74456	2647	2647	53.7575	MS2	19/38
	TDQVLSTSTEVTKEPVNQQVIR	2	2	CID		25.5468	3.34501	0	1	3	2472.29	-1.17943	1561	1561	34.8671	MS2	24/84
	EVTVEENNLQATLDNLK	2	1	CID		56.986	3.13708	0	1	2	1929.98	2.10192	2256	2256	47.0921	MS2	17/32
	DWPWGTIDNNISLVNVK	2	1	CID		26.5383	3.09422	0	1	2	1971	0.220752	2808	2808	56.2625	MS2	20/32
	NYNEAmMMLDYAEAEAVLPK	2	1	CID	M6(Oxidation)	56.3726	3.08742	0.251015	3	2	2319.03	-2.74456	2647	2647	53.7575	MS2	18/38
	VTEGTLVEESTTELDYK	2	1	CID		40.7058	2.98213	0	1	2	1913.92	-1.9794	1917	1917	41.1622	MS2	15/32
	VDENGNETDSSLLETVPENLTSYYLK	2	1	CID		24.9216	2.8952	0	1	3	2930.38	3.14397	2780	2780	55.8267	MS2	32/100
	AIENNAYVVEQPSTNPAFANKK	2	1	CID		71.4511	2.08226	0	1	3	2405.21	1.85967	1510	1510	33.9528	MS2	23/84
	VEEGKEDSAEPAPVEEVGGEVESKPEEK	3	2	CID		9.97736	2.02597	0	1	4	2983.38	-8.42259	1342	1342	30.8551	MS2	39/162
	DMGITADTFEVTEHLVDKLNR	2	1	CID		7.25411	1.90038	0	1	3	2404.18	-0.601015	2990	2990	59.0349	MS2	19/80
	GNGEETEILEDKEVQLDLK	2	1	CID		17.2769	1.79972	0	1	3	2159.07	2.31436	2020	2020	42.951	MS2	16/72
	TSDAPTITETVIEKPQDK	2	1	CID		14.0367	1.49664	0	1	3	1973.01	-0.805351	1413	1413	32.2189	MS2	16/68
	TETTEDPTKYTDEETVLR	3	2	CID		6.65818	0.865024	0	1	3	2127.99	-2.86691	1456	1456	32.995	MS2	12/68
	ETFKSEINKRAK	1	1	CID		3.16067	0.641522	0	1	3	1450.8	-5.63285	2028	2028	43.094	MS2	9/44
gi307126804	33.45	13	293	34.0874	fructose-1,6-bisphosphate aldolase, class II [Streptococcus pneumoniae 670-6B]
	Sequence	# Proteins	# Protein Groups	Activation Type	Modifications	Probability	XCorr	Δ Score	Rank	Charge	MH+ [Da]	ΔM [ppm]	First Scan	Last Scan	RT [min]	MSOrder	Ions Matched	Annotation
	AmVETGIDFLAAGIGNIHGPYPVNWEGLDLDHLQK	1	1	CID	M2(Oxidation)	145.744	5.5097	0	1	3	3806.89	3.05627	3280	3280	63.4296	MS2	39/136
	DNGYAVGGFNTNNLEWTQAILR	1	1	CID		58.0532	5.44407	0	1	3	2453.18	-0.639257	2774	2774	55.7304	MS2	32/84
	AmVETGIDFLAAGIGNIHGPYPVNWEGLDLDHLQK	1	1	CID	M2(Oxidation)	105.495	4.54415	0	1	4	3806.88	-0.43618	3273	3273	63.3245	MS2	49/204
	DNGYAVGGFNTNNLEWTQAILR	1	1	CID		128.063	4.48771	0	1	2	2453.18	-1.60237	2777	2777	55.7833	MS2	24/42
	AMVETGIDFLAAGIGNIHGPYPVNWEGLDLDHLQK	1	1	CID		116.41	4.21194	0	1	3	3790.89	-2.88322	3539	3539	67.2975	MS2	33/136
	AMVETGIDFLAAGIGNIHGPYPVNWEGLDLDHLQK	1	1	CID		27.53	3.2353	0	1	5	3790.89	0.385784	3537	3537	67.2662	MS2	46/272
	GELAPIEDAK	1	1	CID		21.9381	2.33248	0	1	2	1042.54	-2.59327	391	391	12.4969	MS2	11/18
	GISVEAEVGTIGGEEDGIIGK	1	1	CID		41.2384	2.30611	0	1	2	2030.03	-0.197178	2187	2187	45.8797	MS2	15/40
	IDVFGSEGKA	1	1	CID		41.7214	2.01591	0	1	2	1022.52	0.0671581	1315	1315	30.3788	MS2	13/18
	IDVFGSEGK	1	1	CID		4.43398	1.24358	0	1	2	951.476	-2.36362	1303	1303	30.1545	MS2	8/16
	IDVFGSEGKA	1	1	CID		32.1793	1.14299	0	1	2	1022.52	0.616475	1479	1479	33.3992	MS2	11/18
	IDVFGSEGKA	1	1	CID		13.2051	0.934117	0	1	2	1022.52	-0.360088	1156	1156	27.3266	MS2	9/18
	IDVFGSEGKA	1	1	CID		11.3874	0.708719	0	1	2	1022.51	-0.482158	361	361	11.9297	MS2	8/18
gi307068705	34.45	13	299	33.5565	UDP-glucose pyrophosphorylase [Streptococcus pneumoniae AP200]
	Sequence	# Proteins	# Protein Groups	Activation Type	Modifications	Probability	XCorr	Δ Score	Rank	Charge	MH+ [Da]	ΔM [ppm]	First Scan	Last Scan	RT [min]	MSOrder	Ions Matched	Annotation
	DGLYSVETFVEKPAPEETPSDLAIIGR	1	1	CID		130.247	4.93248	0	1	3	2933.48	-2.44225	2588	2588	52.8008	MS2	30/104
	AFVGNEPFVVmLGDDLmDITDEK	6	2	CID	M11(Oxidation) M17(Oxidation)	48.7993	4.6309	0	1	3	2587.19	0.161895	3365	3365	64.699	MS2	37/88
	AFVGNEPFVVMLGDDLMDITDEK	6	2	CID		51.8198	3.56614	0	1	3	2555.2	-2.37871	3951	3951	73.6754	MS2	26/88
	AFVGNEPFVVMLGDDLmDITDEK	6	2	CID	M17(Oxidation)	48.9995	3.30955	0	1	3	2571.2	0.997305	3655	3655	69.0385	MS2	28/88
	AFVGNEPFVVmLGDDLMDITDEK	6	2	CID	M11(Oxidation)	30.4847	3.22172	0.0265399	2	3	2571.2	0.997305	3655	3655	69.0385	MS2	26/88
	EmLPIVDKPTIQFIVEEALK	6	2	CID	M2(Oxidation)	56.1865	3.19242	0	1	3	2329.27	1.72777	3213	3213	62.4471	MS2	26/76
	AFVGNEPFVVmLGDDLmDITDEK	6	2	CID	M11(Oxidation) M17(Oxidation)	98.3172	2.74974	0	1	2	2587.19	-0.984326	3380	3380	64.9235	MS2	25/44
	EMLPIVDKPTIQFIVEEALK	6	2	CID		81.9263	2.61477	0	1	2	2313.28	3.00388	3438	3438	65.7813	MS2	20/38
	AFVGNEPFVVMLGDDLMDITDEK	6	2	CID		76.8623	2.58561	0	1	2	2555.21	1.54099	3947	3947	73.6092	MS2	19/44
	YLLTPEIFEILEK	4	2	CID		32.734	2.0609	0	1	2	1607.89	-0.647647	3394	3394	65.1304	MS2	19/24
	AFVGNEPFVVmLGDDLMDITDEK	6	2	CID	M11(Oxidation)	32.8298	2.0355	0	1	2	2571.2	1.49903	3665	3665	69.191	MS2	15/44
	AFVGNEPFVVMLGDDLmDITDEK	6	2	CID	M17(Oxidation)	52.9697	1.91167	0.0608354	2	2	2571.2	1.49903	3665	3665	69.191	MS2	17/44
	QAPGAGNEIQLTDAIDTLNK	4	2	CID		21.3066	1.87845	0	1	2	2069.05	1.49653	2170	2170	45.5912	MS2	13/38
gi307126945	41.46	28	398	33.5518	translation elongation factor Tu [Streptococcus pneumoniae 670-6B]
	Sequence	# Proteins	# Protein Groups	Activation Type	Modifications	Probability	XCorr	Δ Score	Rank	Charge	MH+ [Da]	ΔM [ppm]	First Scan	Last Scan	RT [min]	MSOrder	Ions Matched	Annotation
	DLLSEYDFPGDDLPVIQGSALK	2	1	CID		123.359	4.23226	0	1	2	2392.19	2.42224	2822	2822	56.4774	MS2	26/42
	QLDEGLAGDNVGVLLR	2	1	CID		143.525	4.09939	0	1	2	1668.89	0.272002	2216	2216	46.3865	MS2	25/30
	VDLVDDEELLELVEmEIR	2	1	CID	M15(Oxidation)	80.097	3.71474	0	1	2	2175.08	2.13903	3533	3533	67.2069	MS2	19/34
	VDLVDDEELLELVEMEIR	2	1	CID		56.1253	3.61995	0	1	3	2159.08	-1.43353	3607	3607	68.3055	MS2	22/68
	VNDEIEIVGIKEETQK	2	1	CID		87.7806	3.49544	0	1	2	1843.96	-2.26929	1691	1691	37.1964	MS2	17/30
	ALEGDSKYEDIVmELmNTVDEYIPEPER	2	1	CID	M13(Oxidation) M16(Oxidation)	56.6122	3.04017	0	1	3	3317.5	-10.942	3513	3513	66.8998	MS2	26/108
	VDLVDDEELLELVEMEIR	2	1	CID		45.938	2.936	0	1	2	2159.08	4.37825	3622	3622	68.5329	MS2	20/34
	VNDEIEIVGIKEETQK	2	1	CID		61.4878	2.35841	0	1	3	1843.96	-1.06203	1730	1730	37.8706	MS2	26/60
	KQLDEGLAGDNVGVLLR	2	1	CID		33.4413	2.22398	0	1	2	1796.98	-2.29077	2097	2097	44.294	MS2	14/32
	QLDEGLAGDNVGVLLR	2	1	CID		16.0535	1.9628	0	1	2	1668.89	-2.90183	2390	2390	49.4391	MS2	13/30
	GITINTAHVEYETEKR	2	1	CID		17.6429	1.96075	0	1	3	1860.94	-0.46707	1336	1336	30.7509	MS2	17/60
	DYASIDAAPEER	2	1	CID		36.6898	1.86867	0	1	2	1336.6	1.46364	885	885	22.1615	MS2	10/22
	DYASIDAAPEER	2	1	CID		38.6313	1.55975	0	1	2	1336.6	0.48708	372	372	12.1297	MS2	11/22
	DYASIDAAPEER	2	1	CID		37.0171	1.42904	0	1	2	1336.6	2.07399	213	213	9.10001	MS2	11/22
	VNDEIEIVGIKEETQK	2	1	CID		22.1851	1.42165	0	1	3	1843.96	-5.63967	1563	1563	34.8994	MS2	17/60
	TVGSGmVTEIEA	2	1	CID	M6(Oxidation)	15.5373	1.40114	0	1	2	1209.57	1.10239	1178	1178	27.7459	MS2	10/22
	TVGSGmVTEIEA	2	1	CID	M6(Oxidation)	19.8406	1.36404	0	1	2	1209.57	0.492041	1021	1021	24.7361	MS2	13/22
	TVGSGMVTEIEA	2	1	CID		29.6704	1.3443	0	1	2	1193.57	-0.320498	1591	1591	35.4148	MS2	11/22
	TVGSGMVTEIEA	2	1	CID		8.00847	1.33336	0	1	2	1193.57	0.167783	1763	1763	38.4657	MS2	9/22
	GQVIAKPGSINPHTK	2	1	CID		12.7811	1.24036	0	1	3	1546.87	-0.591347	506	506	14.8323	MS2	16/56
	TVGSGmVTEIEA	2	1	CID	M6(Oxidation)	8.60396	1.08895	0	1	2	1209.57	2.07895	547	547	15.6514	MS2	7/22
	GQVIAKPGSINPHTK	2	1	CID		4.59185	1.07609	0	1	3	1546.87	-2.78861	354	354	11.8102	MS2	14/56
	GQVIAKPGSINPHTK	2	1	CID		6.26805	0.876122	0	1	3	1546.87	-1.68998	664	664	17.9125	MS2	11/56
	TVGSGMVTEIEA	2	1	CID		10.4773	0.743749	0	1	1	1193.57	-4.76262	1594	1594	35.4601	MS2	6/22
	TVGSGmVTEIEA	2	1	CID	M6(Oxidation)	7.63828	0.600097	0	1	2	1209.57	0.369971	864	864	21.7291	MS2	5/22
	TVGSGmVTEIEA	2	1	CID	M6(Oxidation)	3.26346	0.549902	0	1	2	1209.57	-0.362451	1338	1338	30.7837	MS2	7/22
	GITINTAHVEYETEKR	2	1	CID		26.3346	0.497802	0	1	3	1860.94	-0.283964	379	379	12.2468	MS2	9/60
	LPSSVNQPK	2	1	CID		8.90585	0.485899	0	1	2	969.538	1.84431	511	511	14.9192	MS2	7/16
gi194396940	19.12	25	1203	32.8919	DNA-directed RNA polymerase subunit beta [Streptococcus pneumoniae G54]
	Sequence	# Proteins	# Protein Groups	Activation Type	Modifications	Probability	XCorr	Δ Score	Rank	Charge	MH+ [Da]	ΔM [ppm]	First Scan	Last Scan	RT [min]	MSOrder	Ions Matched	Annotation
	VLDEDDQEVELRDLDEGMDEDVIHVDDLEK	8	1	CID		123.568	7.16928	0	1	3	3527.59	3.87936	2617	2617	53.2613	MS2	39/116
	QAVPLINPQAPYVGTGMEYQAAHDSGAAVIAQYnGK	1	1	CID	N34(Deamidated)	38.4638	3.97389	0	2	4	3730.81	-4.73866	2423	2423	50.0275	MS2	42/210
	EFFGSSQLSQFMDQHNPLSELSHK	8	1	CID		84.1754	3.87169	0	1	3	2793.29	-4.71465	3046	3046	59.8756	MS2	24/92
	QAVPLINPQAPYVGTGMEYQAAHDSGAAVIAqYNGK	1	1	CID	Q32(Deamidated)	23.4333	3.78162	0.0483835	3	4	3730.81	-4.73866	2423	2423	50.0275	MS2	41/210
	VLDEDDQEVELRDLDEGMDEDVIHVDDLEK	8	1	CID		109.074	3.62228	0	1	4	3527.58	-0.711727	2606	2606	53.0906	MS2	47/174
	LVKDDVYTSVHLEEYESETR	8	1	CID		43.3038	3.50855	0	1	3	2412.16	-1.53785	1823	1823	39.5329	MS2	22/76
	QAVPLINPQAPYVGTGMEYqAAHDSGAAVIAQYNGK	1	1	CID	Q20(Deamidated)	16.7008	3.34889	0.157276	4	4	3730.81	-4.73866	2423	2423	50.0275	MS2	42/210
	qAVPLINPQAPYVGTGMEYQAAHDSGAAVIAQYNGK	1	1	CID	Q1(Deamidated)	23.4333	3.16461	0.203648	5	4	3730.81	-4.73866	2423	2423	50.0275	MS2	41/210
	QAVPLINPqAPYVGTGMEYQAAHDSGAAVIAQYNGK	1	1	CID	Q9(Deamidated)	23.4333	3.12446	0.213753	6	4	3730.81	-4.73866	2423	2423	50.0275	MS2	41/210
	QAVPLInPQAPYVGTGMEYQAAHDSGAAVIAQYNGK	1	1	CID	N7(Deamidated)	23.4333	3.05733	0.230646	7	4	3730.81	-4.73866	2423	2423	50.0275	MS2	41/210
	EIPNVGEDALKDLDEMGIIR	8	1	CID		86.2276	2.90412	0	1	2	2227.13	1.34255	3089	3089	60.5276	MS2	21/38
	IVPVEDmPYLPDGTPVDIMLNPLGVPSR	8	1	CID	M7(Oxidation)	4.96397	2.31248	0	1	3	3050.56	3.37611	3021	3021	59.5095	MS2	18/108
	QAVPLINPQAPYVGTGMEYQAAHDSGAAVIAQYnGK	1	1	CID	N34(Deamidated)	10.9522	2.14117	0	1	3	3730.82	-0.0255109	2473	2473	50.899	MS2	20/140
	QAVPLINPQAPYVGTGMEYQAAHDSGAAVIAqYNGK	1	1	CID	Q32(Deamidated)	10.9522	2.099	0.0196929	3	3	3730.82	-0.0255109	2473	2473	50.899	MS2	20/140
	LVKDDVYTSVHLEEYESETR	8	1	CID		5.51256	2.01899	0	1	4	2412.15	-1.91751	1815	1815	39.3841	MS2	28/114
	ALGFSGDDEIFDIFGDSELVR	7	1	CID		11.356	1.89826	0	1	3	2302.09	-0.257909	3374	3374	64.8316	MS2	20/80
	QAVPLINPQAPYVGTGMEYqAAHDSGAAVIAQYNGK	1	1	CID	Q20(Deamidated)	10.9522	1.7482	0.183529	4	3	3730.82	-0.0255109	2473	2473	50.899	MS2	20/140
	ELQSLGLDMR	8	1	CID		31.5229	1.70646	0	1	2	1161.59	0.374228	1759	1759	38.3967	MS2	12/18
	SVGPYSTVTQQPLGGK	8	1	CID		26.8945	1.68198	0	1	2	1618.84	-1.36062	1346	1346	30.9374	MS2	12/30
	VLDEDDQEVELRDLDEGmDEDVIHVDDLEK	8	1	CID	M18(Oxidation)	8.89268	1.60827	0	1	4	3543.58	-2.95095	2258	2258	47.1271	MS2	34/174
	QAVPLINPqAPYVGTGMEYQAAHDSGAAVIAQYNGK	1	1	CID	Q9(Deamidated)	4.72304	1.48577	0.306095	6	3	3730.82	-0.0255109	2473	2473	50.899	MS2	18/140
	QAVPLInPQAPYVGTGMEYQAAHDSGAAVIAQYNGK	1	1	CID	N7(Deamidated)	4.72304	1.09292	0.489567	7	3	3730.82	-0.0255109	2473	2473	50.899	MS2	17/140
	SVIESIESHLDGDLNK	7	1	CID		4.9591	0.932922	0	1	2	1755.87	-9.75276	3241	3241	62.8745	MS2	7/30
	VLDEDDQEVELR	8	1	CID		14.6893	0.888221	0	1	2	1459.69	-1.06022	1224	1224	28.6719	MS2	6/22
	SPGVYFNDK	7	1	CID		2.25258	0.517274	0	1	1	1026.49	5.26348	3334	3334	64.2603	MS2	6/16
gi307126677	18.99	12	774	28.7108	formate acetyltransferase [Streptococcus pneumoniae 670-6B]
	Sequence	# Proteins	# Protein Groups	Activation Type	Modifications	Probability	XCorr	Δ Score	Rank	Charge	MH+ [Da]	ΔM [ppm]	First Scan	Last Scan	RT [min]	MSOrder	Ions Matched	Annotation
	FPMDTRPTSIADIPAGFIDKENEVIFGIQNDELFK	6	1	CID		78.7	5.70309	0	1	4	3967.98	-0.427039	3451	3451	65.9743	MS2	46/204
	GTFTESEIQEFVDDFVMK	6	1	CID		68.0714	4.47519	0	1	2	2121.96	-12.7632	3577	3577	67.8673	MS2	20/34
	AHYEETRFPmDTRPTSIADIPAGFIDKENEVIFGIQNDELFK	6	1	CID	M10(Oxidation)	59.6266	3.78951	0	1	4	4870.39	19.2669	3250	3250	63.0024	MS2	34/246
	VFDIEPIRDEVLEFESVK	3	1	CID		64.5163	3.78748	0	1	3	2164.12	1.40623	3095	3095	60.6246	MS2	31/68
	GTFTESEIQEFVDDFVmK	6	1	CID	M17(Oxidation)	41.151	3.39926	0	1	3	2137.96	0.975391	3388	3388	65.0423	MS2	27/68
	SNELAEWLIEAYTTR	6	1	CID		60.4847	2.9664	0	1	2	1795.89	0.595049	3211	3211	62.4192	MS2	15/28
	VFDIEPIRDEVLEFESVK	3	1	CID		91.6073	2.55565	0	1	2	2164.12	3.06763	3102	3102	60.734	MS2	18/34
	GVYLNEDGSVNLSK	6	1	CID		82.0346	2.03417	0	1	2	1494.74	0.300713	1515	1515	34.0388	MS2	13/26
	SNELAEWLIEAYTTR	6	1	CID		12.879	1.43276	0	1	3	1795.89	6.37994	3209	3209	62.3845	MS2	16/56
	LEFFSPGANPSNK	6	1	CID		39.2901	1.40743	0	1	2	1407.69	-1.96921	1746	1746	38.1637	MS2	9/24
	TVVEAQDIFDK	6	1	CID		22.4342	1.37763	0	1	2	1264.64	-1.83698	1800	1800	39.1226	MS2	8/20
	VFHEVLSmDDALDALS	6	1	CID	M8(Oxidation)	14.6302	0.88032	0	1	2	1777.83	-1.993	2182	2182	45.7992	MS2	7/30
gi182685028	31.1	13	299	28.624	UTP-glucose-1-phosphate uridylyltransferase [Streptococcus pneumoniae CGSP14]
	Sequence	# Proteins	# Protein Groups	Activation Type	Modifications	Probability	XCorr	Δ Score	Rank	Charge	MH+ [Da]	ΔM [ppm]	First Scan	Last Scan	RT [min]	MSOrder	Ions Matched	Annotation
	AFVGNEPFVVmLGDDLmDITDEK	6	2	CID	M11(Oxidation) M17(Oxidation)	48.7993	4.6309	0	1	3	2587.19	0.161895	3365	3365	64.699	MS2	37/88
	AFVGNEPFVVMLGDDLMDITDEK	6	2	CID		51.8198	3.56614	0	1	3	2555.2	-2.37871	3951	3951	73.6754	MS2	26/88
	AFVGNEPFVVMLGDDLmDITDEK	6	2	CID	M17(Oxidation)	48.9995	3.30955	0	1	3	2571.2	0.997305	3655	3655	69.0385	MS2	28/88
	AFVGNEPFVVmLGDDLMDITDEK	6	2	CID	M11(Oxidation)	30.4847	3.22172	0.0265399	2	3	2571.2	0.997305	3655	3655	69.0385	MS2	26/88
	EmLPIVDKPTIQFIVEEALK	6	2	CID	M2(Oxidation)	56.1865	3.19242	0	1	3	2329.27	1.72777	3213	3213	62.4471	MS2	26/76
	AFVGNEPFVVmLGDDLmDITDEK	6	2	CID	M11(Oxidation) M17(Oxidation)	98.3172	2.74974	0	1	2	2587.19	-0.984326	3380	3380	64.9235	MS2	25/44
	EMLPIVDKPTIQFIVEEALK	6	2	CID		81.9263	2.61477	0	1	2	2313.28	3.00388	3438	3438	65.7813	MS2	20/38
	AFVGNEPFVVMLGDDLMDITDEK	6	2	CID		76.8623	2.58561	0	1	2	2555.21	1.54099	3947	3947	73.6092	MS2	19/44
	YLLTPEIFEILEK	4	2	CID		32.734	2.0609	0	1	2	1607.89	-0.647647	3394	3394	65.1304	MS2	19/24
	AFVGNEPFVVmLGDDLMDITDEK	6	2	CID	M11(Oxidation)	32.8298	2.0355	0	1	2	2571.2	1.49903	3665	3665	69.191	MS2	15/44
	EFKGARYDVGDKFGFMK	2	1	CID		5.31727	1.97925	0.174809	3	3	1994.96	-14.4013	2472	2472	50.8812	MS2	21/64
	AFVGNEPFVVMLGDDLmDITDEK	6	2	CID	M17(Oxidation)	52.9697	1.91167	0.0608354	2	2	2571.2	1.49903	3665	3665	69.191	MS2	17/44
	QAPGAGNEIQLTDAIDTLNK	4	2	CID		21.3066	1.87845	0	1	2	2069.05	1.49653	2170	2170	45.5912	MS2	13/38
gi307127341	48.16	13	434	27.8631	phosphopyruvate hydratase [Streptococcus pneumoniae 670-6B]
	Sequence	# Proteins	# Protein Groups	Activation Type	Modifications	Probability	XCorr	Δ Score	Rank	Charge	MH+ [Da]	ΔM [ppm]	First Scan	Last Scan	RT [min]	MSOrder	Ions Matched	Annotation
	FEGTEDGVETILAAIEAAGYVPGK	2	1	CID		95.5684	4.24898	0	1	2	2437.22	2.91489	3524	3524	67.0684	MS2	23/46
	TSAEQIDYLEELVNK	2	1	CID		46.0791	4.11871	0	1	2	1751.87	-0.663076	2447	2447	50.4451	MS2	19/28
	SGETEDSTIADIAVATNAGQIK	2	1	CID		39.6265	3.40536	0	1	2	2191.07	-1.72292	2036	2036	43.2279	MS2	22/42
	IEDQLGEVAEYR	2	1	CID		30.849	3.27043	0	1	2	1421.69	-0.161943	1621	1621	35.9761	MS2	18/22
	VLPTPMMNIINGGSHSDAPIAFQEFMILPVGAPTFK	2	1	CID		45.966	3.1857	0	1	3	3840.97	15.4635	3636	3636	68.7452	MS2	31/140
	GLETAVGDEGGFAPR	2	1	CID		15.2696	2.70642	0	1	2	1475.71	-6.61108	1551	1551	34.6708	MS2	15/28
	GNPTLEVEVYTESGAFGR	2	1	CID		84.7025	2.59012	0	1	2	1925.92	-3.20733	2240	2240	46.7993	MS2	14/34
	AAADYLEIPLYSYLGGFNTK	2	1	CID		62.6774	2.43541	0	1	2	2206.11	1.95888	3161	3161	61.6286	MS2	15/38
	GIQEGAANSILIK	2	1	CID		36.5485	1.90194	0	1	2	1313.74	0.0679394	1582	1582	35.258	MS2	17/24
	GNPTLEVEVYTESGAFGR	2	1	CID		20.0742	1.83625	0	1	3	1925.92	-1.5118	2289	2289	47.6694	MS2	20/68
	GmVPSGASTGEHEAVELR	2	1	CID	M2(Oxidation)	14.5249	1.19061	0	1	3	1842.87	2.91984	411	411	12.9359	MS2	11/68
	GMVPSGASTGEHEAVELR	2	1	CID		8.51543	0.414196	0	1	3	1826.87	-1.5548	1385	1385	31.6691	MS2	15/68
	KVYDYTKFEGEGAAVR	2	1	CID		13.2966	0.401343	0.821973	3	2	1832.92	7.16306	2047	2047	43.4225	MS2	3/30
gi307128002	30.69	22	202	25.0045	Gls24 protein [Streptococcus pneumoniae 670-6B]
	Sequence	# Proteins	# Protein Groups	Activation Type	Modifications	Probability	XCorr	Δ Score	Rank	Charge	MH+ [Da]	ΔM [ppm]	First Scan	Last Scan	RT [min]	MSOrder	Ions Matched	Annotation
	VSDVAESTGEFTSEQFEK	1	1	CID		127.183	3.54262	0	1	2	1989.89	-0.445928	1769	1769	38.5647	MS2	21/34
	VSDVAESTGEFTSEQFEK	1	1	CID		55.0141	3.24016	0	1	3	1989.89	1.24961	1678	1678	36.9631	MS2	28/68
	VSDVAESTGEFTSEQFEK	1	1	CID		53.3179	2.81336	0	1	2	1989.89	-1.17835	367	367	12.0296	MS2	16/34
	SGLGSGFSTVQEK	1	1	CID		61.2758	2.33076	0	1	2	1296.64	-0.333506	1199	1199	28.1943	MS2	18/24
	SGLGSGFSTVQEK	1	1	CID		27.3008	2.2166	0	1	2	1296.64	1.00927	1042	1042	25.1739	MS2	15/24
	VSDVAESTGEFTSEQFEK	1	1	CID		71.974	2.07131	0	1	2	1989.89	-1.30042	1598	1598	35.5319	MS2	15/34
	SGLGSGFSTVQEK	1	1	CID		42.236	1.88874	0	1	2	1296.64	0.154775	1363	1363	31.2647	MS2	14/24
	SGLGSGFSTVQEK	1	1	CID		52.5693	1.74777	0	1	2	1296.64	0.520986	883	883	22.122	MS2	15/24
	GAAnGVVSHENTR	1	1	CID	N4(Deamidated)	29.9043	1.7306	0	1	2	1312.62	-3.91251	445	445	13.7059	MS2	11/24
	VSEGVEAVK	1	1	CID		26.314	1.71739	0	1	2	917.494	-0.0692872	491	491	14.5667	MS2	13/16
	VSEGVEAVK	1	1	CID		11.9316	1.70514	0	1	2	917.495	0.84624	647	647	17.6018	MS2	12/16
	VSEGVEAVK	1	1	CID		15.6759	1.45946	0	1	2	917.494	0.6021	339	339	11.5617	MS2	12/16
[truncated: 1,171 more rows]

## Sheet: 5104-8 (3)
Accession #	Coverage	# Peptides	#AAs	Score	Description
[truncated: 1,616 more rows]

[truncated: 16 more sheets: 5231-9V (1), 5231-9V (2), 5278-14 (1), 5278-14 (2), 5278-14 (3), 5284-9V (1), 5284-9V (2), 5330-7F (1), 5330-7F (2), 5330-7F (3), 5333-19A (1), 5334-8 (1), 5334-8 (2), 5334-8 (3), 5334-8 (4), 5334-8 (5)]
