# Supplementary material for: Identification of Potential New Protein Vaccine Candidates through Pan-Surfomic Analysis of Pneumococcal Clinical Isolates from Adults
Source: PLoS One. 2013 Jul 23;8(7):e70365. doi: 10.1371/journal.pone.0070365 (PMC3720901; doi:10.1371/journal.pone.0070365)
Supplement: Dataset S3 — Sequest raw data of protein and peptide identifications for S. pneumoniae clinical isolates 5335-5, 5337-7F, 5341-1, 5342-3, 5343-14, 5344-19A, 5345-1 and 5431-12F. Each isolate’s data are given separately in one or more datasheets. (XLS) [file pone.0070365.s004.xls]

## Sheet: 5335-5 (1)
Accession #	Coverage	# Peptides	#AAs	Score	Description
gi307126945	37.94	27	398	71.8702	translation elongation factor Tu [Streptococcus pneumoniae 670-6B]
	Sequence	# Proteins	# Protein Groups	Activation Type	Modifications	Probability	XCorr	Δ Score	Rank	Charge	MH+ [Da]	ΔM [ppm]	First Scan	Last Scan	RT [min]	MSOrder	Ions Matched	Annotation
	DTDKPLLLPVEDVFSITGR	2	1	CID		129.33	5.73873	0	1	3	2115.13	1.41744	4534	4534	64.3306	MS2	37/72
	DLLSEYDFPGDDLPVIQGSALK	2	1	CID		121.639	5.36172	0	1	2	2392.19	0.957393	4385	4385	63.004	MS2	23/42
	DTDKPLLLPVEDVFSITGR	2	1	CID		111.059	4.91158	0	1	3	2115.14	1.96676	4859	4859	67.3476	MS2	34/72
	DTDKPLLLPVEDVFSITGR	2	1	CID		141.693	4.33856	0	1	2	2115.13	-0.949482	4371	4371	62.8753	MS2	26/36
	DLLSEYDFPGDDLPVIQGSALK	2	1	CID		117.732	3.93559	0	1	2	2392.2	3.15466	4717	4717	66.0164	MS2	18/42
	DTDKPLLLPVEDVFSITGR	2	1	CID		89.7181	3.34209	0	1	2	2115.13	-0.217061	4701	4701	65.8891	MS2	20/36
	DTDKPLLLPVEDVFSITGR	2	1	CID		51.3678	3.32842	0	1	3	2115.13	0.68502	7002	7002	89.7714	MS2	23/72
	DTDKPLLLPVEDVFSITGR	2	1	CID		81.3302	3.22677	0	1	3	2115.13	1.23434	5165	5165	70.3576	MS2	34/72
	DTDKPLLLPVEDVFSITGR	2	1	CID		51.2956	3.11399	0	1	3	2115.13	-0.962929	6257	6257	80.7257	MS2	28/72
	NmITGAAQmDGAILVVASTDGPmPQTR	2	1	CID	M2(Oxidation) M9(Oxidation) M23(Oxidation)	18.4054	3.07486	0	1	3	2793.32	1.04176	2237	2237	42.6779	MS2	27/104
	DLLSEYDFPGDDLPVIQGSALK	2	1	CID		52.6805	3.02243	0	1	2	2392.19	0.713252	5033	5033	69.0938	MS2	19/42
	YEDIVMELmNTVDEYIPEPER	2	1	CID	M9(Oxidation)	49.4357	2.94936	0	1	2	2601.17	-1.20542	5358	5358	72.3348	MS2	16/40
	TTDVTGSIELPAGTEmVmPGDNVTIDVELIHPIAVEQGTTFSIR	2	1	CID	M16(Oxidation) M18(Oxidation)	12.6091	2.89859	0	1	4	4686.32	1.29257	4698	4698	65.8566	MS2	32/258
	YEDIVmELMNTVDEYIPEPER	2	1	CID	M6(Oxidation)	38.6763	2.87106	0.0265464	2	2	2601.17	-1.20542	5358	5358	72.3348	MS2	16/40
	YEDIVMELmNTVDEYIPEPER	2	1	CID	M9(Oxidation)	22.4528	2.7923	0	1	3	2601.17	-7.93273	5425	5425	72.9037	MS2	23/80
	YEDIVmELMNTVDEYIPEPER	2	1	CID	M6(Oxidation)	22.4528	2.69186	0.0359677	2	3	2601.17	-7.93273	5425	5425	72.9037	MS2	22/80
	DTDKPLLLPVEDVFSITGR	2	1	CID		26.3447	2.63896	0	1	3	2115.14	1.78365	6522	6522	83.7396	MS2	22/72
	NMITGAAQmDGAILVVASTDGPmPqTR	2	1	CID	M9(Oxidation) M23(Oxidation) Q25(Deamidated)	4.91449	2.57177	0	1	3	2778.31	-0.510413	2804	2804	48.6231	MS2	18/104
	VDLVDDEELLELVEmEIR	2	1	CID	M15(Oxidation)	13.1657	2.15536	0	1	3	2175.07	0.294532	5419	5419	72.8583	MS2	18/68
	DLLSEYDFPGDDLPVIQGSALK	2	1	CID		41.5674	1.99385	0	1	2	2392.19	2.91052	5347	5347	72.2356	MS2	11/42
	YEDIVmELmNTVDEYIPEPER	2	1	CID	M6(Oxidation) M9(Oxidation)	37.4127	1.95436	0	1	2	2617.17	-0.270811	5312	5312	71.8847	MS2	11/40
	VDLVDDEELLELVEmEIR	2	1	CID	M15(Oxidation)	29.1921	1.80477	0	1	2	2175.07	-0.0582325	5451	5451	73.1704	MS2	15/34
	DTDKPLLLPVEDVFSITGR	2	1	CID		31.3428	1.77179	0	1	2	2115.13	0.02708	6929	6929	88.4845	MS2	9/36
	YEDIVmELmNTVDEYIPEPER	2	1	CID	M6(Oxidation) M9(Oxidation)	22.704	1.62386	0	1	2	2617.16	-5.6419	6895	6895	88.0364	MS2	13/40
	NmITGAAQMDGAILVVASTDGPmPqTR	2	1	CID	M2(Oxidation) M23(Oxidation) Q25(Deamidated)	11.6106	1.61287	0.372858	9	3	2778.31	-0.510413	2804	2804	48.6231	MS2	21/104
	DTDKPLLLPVEDVFSITGR	2	1	CID		67.5039	1.56098	0	1	2	2115.13	-0.949482	5058	5058	69.3434	MS2	11/36
	DTDKPLLLPVEDVFSITGR	2	1	CID		52.8156	1.50336	0	1	3	2115.13	-1.51225	6769	6769	86.7498	MS2	25/72
gi307127228	43.68	17	87	58.6877	phosphocarrier protein HPr [Streptococcus pneumoniae 670-6B]
	Sequence	# Proteins	# Protein Groups	Activation Type	Modifications	Probability	XCorr	Δ Score	Rank	Charge	MH+ [Da]	ΔM [ppm]	First Scan	Last Scan	RT [min]	MSOrder	Ions Matched	Annotation
	SImGVmSLGVGQGADVTISAEGADADDAIAAISETmEK	1	1	CID	M3(Oxidation) M6(Oxidation) M36(Oxidation)	139.634	5.5568	0	1	3	3758.73	2.0242	4171	4171	61.1383	MS2	44/148
	SImGVmSLGVGQGADVTISAEGADADDAIAAISETmEK	1	1	CID	M3(Oxidation) M6(Oxidation) M36(Oxidation)	300	5.49914	0	1	3	3758.73	3.48904	4950	4950	68.1861	MS2	43/148
	SImGVmSLGVGQGADVTISAEGADADDAIAAISETmEK	1	1	CID	M3(Oxidation) M6(Oxidation) M36(Oxidation)	138.406	4.85159	0	1	3	3758.74	6.41873	4625	4625	65.1653	MS2	38/148
	SImGVmSLGVGQGADVTISAEGADADDAIAAISETmEK	1	1	CID	M3(Oxidation) M6(Oxidation) M36(Oxidation)	88.2982	4.44103	0	1	3	3758.73	3.48904	5735	5735	75.878	MS2	42/148
	SImGVmSLGVGQGADVTISAEGADADDAIAAISETmEK	1	1	CID	M3(Oxidation) M6(Oxidation) M36(Oxidation)	117.605	4.2994	0	1	4	3758.74	11.105	4643	4643	65.333	MS2	44/222
	SImGVmSLGVGQGADVTISAEGADADDAIAAISETmEK	1	1	CID	M3(Oxidation) M6(Oxidation) M36(Oxidation)	105.391	3.97617	0	1	4	3758.72	-13.3091	6154	6154	79.8773	MS2	45/222
	SImGVmSLGVGQGADVTISAEGADADDAIAAISETmEK	1	1	CID	M3(Oxidation) M6(Oxidation) M36(Oxidation)	99.1666	3.88335	0	1	3	3758.74	9.71463	5418	5418	72.8521	MS2	38/148
	SImGVmSLGVGQGADVTISAEGADADDAIAAISETmEK	1	1	CID	M3(Oxidation) M6(Oxidation) M36(Oxidation)	74.2327	3.76179	0	1	4	3758.74	5.48976	4965	4965	68.3396	MS2	43/222
	SImGVmSLGVGQGADVTISAEGADADDAIAAISETmEK	1	1	CID	M3(Oxidation) M6(Oxidation) M36(Oxidation)	86.0244	3.73284	0	1	3	3758.73	-0.539277	6399	6399	82.4073	MS2	35/148
	SImGVmSLGVGQGADVTISAEGADADDAIAAISETmEK	1	1	CID	M3(Oxidation) M6(Oxidation) M36(Oxidation)	56.519	3.53152	0	1	4	3758.74	9.64015	4289	4289	62.1611	MS2	44/222
	SImGVmSLGVGQGADVTISAEGADADDAIAAISETmEK	1	1	CID	M3(Oxidation) M6(Oxidation) M36(Oxidation)	63.7824	3.431	0	1	4	3758.73	0.606945	6860	6860	87.6401	MS2	41/222
	SImGVmSLGVGQGADVTISAEGADADDAIAAISETmEK	1	1	CID	M3(Oxidation) M6(Oxidation) M36(Oxidation)	41.561	3.15017	0	1	3	3758.74	9.34842	6760	6760	86.6692	MS2	30/148
	SImGVmSLGVGQGADVTISAEGADADDAIAAISETmEK	1	1	CID	M3(Oxidation) M6(Oxidation) M36(Oxidation)	52.8812	2.93158	0	1	3	3758.74	8.616	7007	7007	89.8344	MS2	27/148
	SImGVmSLGVGQGADVTISAEGADADDAIAAISETmEK	1	1	CID	M3(Oxidation) M6(Oxidation) M36(Oxidation)	55.8197	2.91585	0	1	3	3758.74	10.4471	6094	6094	79.3421	MS2	29/148
	SIMGVmSLGVGQGADVTISAEGADADDAIAAISETmEK	1	1	CID	M6(Oxidation) M36(Oxidation)	30.6749	2.72545	0	1	3	3742.72	-16.3665	5088	5088	69.6459	MS2	26/148
	SImGVMSLGVGQGADVTISAEGADADDAIAAISETmEK	1	1	CID	M3(Oxidation) M36(Oxidation)	30.6749	2.69478	0.0112533	2	3	3742.72	-16.3665	5088	5088	69.6459	MS2	27/148
	SImGVmSLGVGQGADVTISAEGADADDAIAAISETMEK	1	1	CID	M3(Oxidation) M6(Oxidation)	8.21407	2.5221	0.0746088	3	3	3742.72	-16.3665	5088	5088	69.6459	MS2	29/148
gi307126614	36.53	20	427	55.6755	trigger factor [Streptococcus pneumoniae 670-6B]
	Sequence	# Proteins	# Protein Groups	Activation Type	Modifications	Probability	XCorr	Δ Score	Rank	Charge	MH+ [Da]	ΔM [ppm]	First Scan	Last Scan	RT [min]	MSOrder	Ions Matched	Annotation
	DAVEGAAIDTAVENAEIVELPEEmIHEEVHR	9	1	CID	M24(Oxidation)	119.364	5.26185	0	1	4	3431.63	0.277883	3682	3682	56.7902	MS2	45/180
	DAVEGAAIDTAVENAEIVELPEEmIHEEVHR	9	1	CID	M24(Oxidation)	109.455	4.99384	0	1	3	3431.63	2.42756	3523	3523	55.3417	MS2	32/120
	EVEQLAADYNmEVAQVQNLLSADmLK	8	1	CID	M11(Oxidation) M24(Oxidation)	40.3748	4.8431	0	1	3	2954.41	-1.57158	4792	4792	66.7084	MS2	34/100
	EEAYKDAVEGAAIDTAVENAEIVELPEEmIHEEVHR	8	1	CID	M29(Oxidation)	154.775	4.30177	0	1	3	4051.91	3.3117	3774	3774	57.5508	MS2	33/140
	EAAAENGDTVVIDFVGSIDGVEFDGGK	8	1	CID		71.9317	4.09545	0	1	3	2711.27	-0.137636	4827	4827	67.028	MS2	33/104
	DIDEEVETLADLK	9	1	CID		77.0898	3.94451	0	1	2	1489.73	-1.01362	2920	2920	49.7745	MS2	21/24
	FGEEALYQDAmNALLPNAYEAAVK	3	1	CID	M11(Oxidation)	62.3072	3.72409	0	1	3	2644.26	1.32039	4073	4073	60.2378	MS2	30/92
	DAVEGAAIDTAVENAEIVELPEEMIHEEVHR	9	1	CID		109.211	3.70783	0	1	4	3415.63	1.78468	4759	4759	66.391	MS2	36/180
	EAAAENGDTVVIDFVGSIDGVEFDGGK	8	1	CID		29.4992	3.13529	0	1	3	2711.26	-3.61664	5134	5134	70.0565	MS2	19/104
	QGINPDmYFQITGTTQEDLHNQYQAEAESR	9	1	CID	M7(Oxidation)	108.948	3.09107	0	1	3	3500.56	-1.48799	2760	2760	48.2194	MS2	22/116
	DAVEGAAIDTAVENAEIVELPEEmIHEEVHR	9	1	CID	M24(Oxidation)	22.792	2.87951	0	1	5	3431.63	3.37723	3557	3557	55.6924	MS2	44/240
	DAVEGAAIDTAVENAEIVELPEEmIHEEVHR	9	1	CID	M24(Oxidation)	86.5409	2.66077	0	1	3	3431.63	5.35725	3865	3865	58.3614	MS2	27/120
	FGEEALYQDAmNALLPNAYEAAVK	3	1	CID	M11(Oxidation)	12.1679	2.63474	0	1	3	2644.27	11.025	4755	4755	66.3543	MS2	25/92
	EAAAENGDTVVIDFVGSIDGVEFDGGK	8	1	CID		56.3524	2.47642	0	1	2	2711.27	2.62239	5002	5002	68.7422	MS2	14/52
	FGEEALYQDAmNALLPNAYEAAVK	3	1	CID	M11(Oxidation)	24.1312	2.07128	0	1	3	2644.26	0.221759	3736	3736	57.2264	MS2	20/92
	FGEEALYQDAmNALLPNAYEAAVK	3	1	CID	M11(Oxidation)	15.3295	1.87692	0	1	3	2644.26	-2.70793	4416	4416	63.2837	MS2	18/92
	FGEEALYQDAmNALLPNAYEAAVK	3	1	CID	M11(Oxidation)	76.7341	1.85395	0	1	2	2644.26	2.18833	4021	4021	59.7704	MS2	19/46
	DAVEGAAIDTAVENAEIVELPEEMIHEEVHR	9	1	CID		9.8082	1.82628	0.0892131	2	5	3415.64	7.99682	4825	4825	67.0092	MS2	36/240
	EEAYKDAVEGAAIDTAVENAEIVELPEEmIHEEVHR	8	1	CID	M29(Oxidation)	14.1429	1.61289	0.270939	5	5	4051.91	-0.438337	3706	3706	56.9697	MS2	43/280
	DAVEGAAIDTAVENAEIVELPEEmIHEEVHR	9	1	CID	M24(Oxidation)	12.5126	1.57316	0.438872	3	3	3431.64	8.28693	4227	4227	61.6037	MS2	17/120
gi307067830	27	18	574	48.1674	PTS system phosphoenolpyruvate-protein kinase [Streptococcus pneumoniae AP200]
	Sequence	# Proteins	# Protein Groups	Activation Type	Modifications	Probability	XCorr	Δ Score	Rank	Charge	MH+ [Da]	ΔM [ppm]	First Scan	Last Scan	RT [min]	MSOrder	Ions Matched	Annotation
	KLPNPASINEEVIVIAHDLTPSDTAQLDK	6	1	CID		104.637	5.24886	0	1	3	3128.65	0.879317	4596	4596	64.9183	MS2	39/112
	LPNPASINEEVIVIAHDLTPSDTAQLDK	6	1	CID		98.1289	5.16289	0	1	3	3000.55	-2.53935	5113	5113	69.8711	MS2	31/108
	AYLLVQPDLSFETITVEDTNAEEAR	5	1	CID		79.4489	5.08367	0	1	3	2824.39	0.912325	3946	3946	59.0652	MS2	34/96
	AVGTLGEEAAQVFDAHLmVLADPEmISQIK	5	1	CID	M18(Oxidation) M25(Oxidation)	152.556	4.52979	0	1	3	3215.59	-1.51748	5238	5238	71.06	MS2	33/116
	TEFLYmDSQDFPTEDEQYEAYK	6	1	CID	M6(Oxidation)	74.2616	4.17676	0	1	3	2765.14	-1.74678	2672	2672	47.3613	MS2	28/84
	EVTDmFITIFEGmEDNPYmQER	6	1	CID	M5(Oxidation) M13(Oxidation) M19(Oxidation)	82.7548	4.04913	0	1	3	2743.15	-4.71426	3585	3585	55.9263	MS2	36/84
	AVGTLGEEAAQVFDAHLmVLADPEMISQIK	5	1	CID	M18(Oxidation)	80.0067	3.74134	0	1	3	3199.6	-1.96381	5394	5394	72.6443	MS2	27/116
	AVGTLGEEAAQVFDAHLMVLADPEmISQIK	5	1	CID	M25(Oxidation)	18.5285	3.61072	0.0349128	2	3	3199.6	-1.96381	5394	5394	72.6443	MS2	27/116
	AVGTLGEEAAQVFDAHLmVLADPEmISQIK	5	1	CID	M18(Oxidation) M25(Oxidation)	27.7876	3.4536	0	1	4	3215.59	-2.81266	5004	5004	68.762	MS2	33/174
	KLPNPASINEEVIVIAHDLTPSDTAQLDK	6	1	CID		30.7401	3.01899	0	1	3	3128.65	3.07658	4928	4928	67.9919	MS2	27/112
	AYLLVQPDLSFETITVEDTNAEEAR	5	1	CID		11.7148	2.81333	0	1	3	2824.39	4.20822	4515	4515	64.1788	MS2	22/96
	EVTDmFITIFEGmEDNPYmQER	6	1	CID	M5(Oxidation) M13(Oxidation) M19(Oxidation)	39.8206	2.62463	0	1	2	2743.15	-7.14222	3860	3860	58.3117	MS2	12/42
	EVTDmFITIFEGmEDNPYmQER	6	1	CID	M5(Oxidation) M13(Oxidation) M19(Oxidation)	69.6293	2.33309	0	1	2	2743.15	-4.70081	3501	3501	55.1167	MS2	18/42
	AVGTLGEEAAQVFDAHLmVLADPEMISQIK	5	1	CID	M18(Oxidation)	10.9643	2.26685	0	1	4	3199.6	-2.03829	5387	5387	72.5832	MS2	33/174
	KLPNPASINEEVIVIAHDLTPSDTAQLDK	6	1	CID		4.85131	2.2131	0	1	4	3128.65	3.24624	4885	4885	67.5943	MS2	31/168
	TEFLYmDSQDFPTEDEQYEAYK	6	1	CID	M6(Oxidation)	49.8985	1.93131	0	1	2	2765.14	-1.42815	2752	2752	48.1476	MS2	16/42
	DGDILAVNGITGEVIINPTDEQAAEFK	5	1	CID		13.468	1.08505	0	1	2	2829.41	-1.54534	3644	3644	56.4529	MS2	9/52
	TEFLYmDSQDFPTEDEQYEAYK	6	1	CID	M6(Oxidation)	56.6543	1.07727	0	1	2	2765.15	5.16364	2464	2464	45.1287	MS2	15/42
gi307126729	34.43	17	607	43.2668	chaperone protein DnaK [Streptococcus pneumoniae 670-6B]
	Sequence	# Proteins	# Protein Groups	Activation Type	Modifications	Probability	XCorr	Δ Score	Rank	Charge	MH+ [Da]	ΔM [ppm]	First Scan	Last Scan	RT [min]	MSOrder	Ions Matched	Annotation
	LYEQAAAAQQAQEGAEGAQATGNAGDDVVDGEFTEK	5	1	CID		89.0877	4.33074	0	1	3	3639.63	1.58674	1879	1879	38.3019	MS2	38/140
	SVNPDEVVAmGAAIQGGVITGDVK	5	1	CID	M10(Oxidation)	45.131	4.32476	0	1	3	2343.19	-0.737343	2393	2393	44.3548	MS2	34/92
	SVNPDEVVAMGAAIQGGVITGDVK	5	1	CID		54.4571	3.81872	0	1	3	2327.19	2.29533	3364	3364	53.914	MS2	33/92
	QALSDAGLSLSEIDEVILVGGSTR	5	1	CID		38.5047	3.6734	0	1	3	2430.27	0.0827547	4763	4763	66.4368	MS2	26/92
	QALSDAGLSLSEIDEVILVGGSTR	5	1	CID		93.7594	3.51519	0	1	2	2430.27	2.3545	4766	4766	66.4611	MS2	26/46
	DLSGVTSTQISLPFITAGEAGPLHLEmTLTR	5	1	CID	M27(Oxidation)	44.4207	3.45001	0	1	3	3271.7	7.50346	5001	5001	68.7362	MS2	25/120
	SVNPDEVVAMGAAIQGGVITGDVK	5	1	CID		40.9388	3.21887	0	1	2	2327.19	-0.0715919	3377	3377	54.0186	MS2	19/46
	SQVFSTAADNQPAVDIHVLQGERPmAADNK	5	1	CID	M25(Oxidation)	75.9041	3.15504	0	1	4	3225.56	0.236789	2059	2059	40.5364	MS2	31/174
	QALSDAGLSLSEIDEVILVGGSTR	5	1	CID		91.1908	2.78164	0	1	2	2430.27	2.3545	4435	4435	63.4457	MS2	23/46
	QALSDAGLSLSEIDEVILVGGSTR	5	1	CID		13.5439	2.34899	0	1	3	2430.27	0.448966	4433	4433	63.4283	MS2	22/92
	DVVLLDVTPLSLGIETmGGVFTK	5	1	CID	M17(Oxidation)	84.7263	2.32878	0	1	2	2420.3	-0.306436	5062	5062	69.3833	MS2	18/44
	SQVFSTAADNQPAVDIHVLQGERPmAADNK	5	1	CID	M25(Oxidation)	43.9062	2.27538	0	1	3	3225.56	0.433341	2011	2011	39.947	MS2	23/116
	IIGIDLGTTNSAVAVLEGTESK	5	1	CID		39.4849	2.02805	0	1	2	2188.17	3.28856	3496	3496	55.0737	MS2	15/42
	QALSDAGLSLSEIDEVILVGGSTR	5	1	CID		36.1266	2.0172	0	1	2	2430.28	3.33106	5073	5073	69.483	MS2	17/46
	LYEQAAAAQQAQEGAEGAQATGNAGDDVVDGEFTEK	5	1	CID		27.5386	2.00638	0	1	4	3639.63	-3.85884	1920	1920	38.8546	MS2	31/210
	EQTIVIQSNSGLTDEEIDR	5	1	CID		17.6104	1.4548	0	1	2	2147.05	3.02271	1550	1550	33.7186	MS2	9/36
	QALSDAGLSLSEIDEVILVGGSTR	5	1	CID		7.95386	1.20364	0.239635	2	3	2430.27	-0.832773	5079	5079	69.5416	MS2	18/92
gi225858695	23.75	15	501	42.4765	pyruvate kinase [Streptococcus pneumoniae 70585]
	Sequence	# Proteins	# Protein Groups	Activation Type	Modifications	Probability	XCorr	Δ Score	Rank	Charge	MH+ [Da]	ΔM [ppm]	First Scan	Last Scan	RT [min]	MSOrder	Ions Matched	Annotation
	SEVSDVFNAVIDGTDATmLSGESANGK	7	1	CID	M18(Oxidation)	9.98031	4.56577	0	1	3	2730.26	20.0583	4106	4106	60.5277	MS2	28/104
	IENQQGIDNLDEIIEAADGImIAR	6	1	CID	M21(Oxidation)	140.151	4.53193	0	1	3	2657.31	1.74473	4743	4743	66.2431	MS2	38/92
	IENQQGIDNLDEIIEAADGImIAR	6	1	CID	M21(Oxidation)	62.624	4.03224	0	1	2	2657.31	0.0491894	4757	4757	66.3727	MS2	22/46
	SEVSDVFNAVIDGTDATmLSGESANGK	7	1	CID	M18(Oxidation)	72.4801	3.91053	0	1	2	2730.24	-1.90089	3789	3789	57.6935	MS2	20/52
	IENQQGIDNLDEIIEAADGImIAR	6	1	CID	M21(Oxidation)	70.3609	3.83793	0	1	2	2657.31	3.7113	4424	4424	63.3534	MS2	22/46
	IENQQGIDNLDEIIEAADGImIAR	6	1	CID	M21(Oxidation)	76.4368	3.52094	0	1	3	2657.31	-1.18496	4407	4407	63.2147	MS2	30/92
	AVEAGLVESGDDIVIVAGVPVGEAVR	6	1	CID		92.5594	3.47251	0	1	3	2521.36	4.3485	3467	3467	54.826	MS2	29/100
	IENQQGIDNLDEIIEAADGImIAR	6	1	CID	M21(Oxidation)	83.9036	3.15677	0	1	3	2657.31	0.646095	5050	5050	69.2535	MS2	29/92
	AVEAGLVESGDDIVIVAGVPVGEAVR	6	1	CID		14.3382	2.50566	0	1	3	2521.36	4.16539	3815	3815	57.9238	MS2	24/100
	SEVSDVFNAVIDGTDATmLSGESANGK	7	1	CID	M18(Oxidation)	54.739	2.45338	0	1	2	2730.25	5.66747	4125	4125	60.7038	MS2	14/52
	AVEAGLVESGDDIVIVAGVPVGEAVR	6	1	CID		38.5522	2.20467	0	1	2	2521.35	2.34778	3806	3806	57.8447	MS2	12/50
	AVEAGLVESGDDIVIVAGVPVGEAVR	6	1	CID		50.546	2.16528	0	1	2	2521.35	1.12708	3465	3465	54.8079	MS2	16/50
	GDmGIEVPFEmVPVYQK	6	1	CID	M3(Oxidation) M11(Oxidation)	13.3951	2.11891	0	1	2	1970.93	3.61653	2385	2385	44.2568	MS2	12/32
	EFEVEVENDGIIAK	6	1	CID		31.5342	1.34481	0	1	2	1591.79	0.48876	1887	1887	38.4172	MS2	12/26
	nAQALLNEYGR	7	1	CID	N1(Deamidated)	14.5874	0.421945	0.128837	2	2	1249.61	-10.6944	1022	1022	25.2402	MS2	5/20
gi225858339	17.84	10	398	39.5568	phosphoglycerate kinase [Streptococcus pneumoniae 70585]
	Sequence	# Proteins	# Protein Groups	Activation Type	Modifications	Probability	XCorr	Δ Score	Rank	Charge	MH+ [Da]	ΔM [ppm]	First Scan	Last Scan	RT [min]	MSOrder	Ions Matched	Annotation
	GAELEAAINALEDGQVLLVENTR	4	1	CID		300	5.90604	0	1	3	2425.26	0.866388	5409	5409	72.7868	MS2	37/88
	GAELEAAINALEDGQVLLVENTR	4	1	CID		95.107	4.76649	0	1	2	2425.26	0.330518	5410	5410	72.793	MS2	28/44
	GAELEAAINALEDGQVLLVENTR	4	1	CID		82.4299	4.13843	0	1	3	2425.26	2.14813	5099	5099	69.7505	MS2	27/88
	DTEGEAVSEGFLGLDIGPK	5	1	CID		88.9421	4.12521	0	1	2	1933.94	0.215283	3278	3278	53.1888	MS2	25/36
	GAELEAAINALEDGQVLLVENTR	4	1	CID		72.6069	3.40169	0	1	3	2425.26	4.16229	6126	6126	79.616	MS2	27/88
	GAELEAAINALEDGQVLLVENTR	4	1	CID		24.0192	3.3102	0	1	2	2425.25	-7.23784	5100	5100	69.7566	MS2	19/44
	GAELEAAINALEDGQVLLVENTR	4	1	CID		74.1496	3.26575	0	1	3	2425.26	-0.0491398	6419	6419	82.6321	MS2	30/88
	DTEGEAVSEGFLGLDIGPK	5	1	CID		41.6923	3.23117	0	1	2	1933.93	-4.05718	2965	2965	50.1807	MS2	17/36
	TVVWNGPmGVFENPDFQTGTIGVmDAIVK	1	1	CID	M8(Oxidation) M24(Oxidation)	21.5913	2.34453	0	1	3	3154.52	-0.249316	4098	4098	60.4617	MS2	22/112
	GAELEAAINALEDGQVLLVENTR	4	1	CID		25.1921	1.33136	0.273646	2	3	2425.25	-2.24641	5793	5793	76.422	MS2	17/88
gi307127341	21.66	12	434	28.6294	phosphopyruvate hydratase [Streptococcus pneumoniae 670-6B]
	Sequence	# Proteins	# Protein Groups	Activation Type	Modifications	Probability	XCorr	Δ Score	Rank	Charge	MH+ [Da]	ΔM [ppm]	First Scan	Last Scan	RT [min]	MSOrder	Ions Matched	Annotation
	GNPTLEVEVYTESGAFGR	2	1	CID		120.059	4.03077	0	1	2	1925.92	0.576846	2765	2765	48.2659	MS2	20/34
	VNQIGTLTETFEAIEmAK	2	1	CID	M16(Oxidation)	97.2445	3.90428	0	1	2	2011.01	-0.161748	4185	4185	61.2435	MS2	21/34
	FEGTEDGVETILAAIEAAGYVPGK	2	1	CID		77.7907	3.25817	0	1	2	2437.21	-1.72378	5424	5424	72.8977	MS2	23/46
	GNPTLEVEVYTESGAFGR	2	1	CID		69.9599	3.06671	0	1	2	1925.93	1.55341	2477	2477	45.2658	MS2	19/34
	TSAEQIDYLEELVNK	2	1	CID		47.7781	2.7471	0	1	3	1751.87	1.94799	2875	2875	49.3555	MS2	22/56
	VNQIGTLTETFEAIEmAK	2	1	CID	M16(Oxidation)	22.5855	2.61417	0	1	3	2011.01	3.54795	3873	3873	58.42	MS2	20/68
	VNQIGTLTETFEAIEmAK	2	1	CID	M16(Oxidation)	23.5423	2.53154	0	1	2	2011.01	4.11071	3847	3847	58.2029	MS2	14/34
	VNQIGTLTETFEAIEMAK	2	1	CID		6.28184	2.32292	0	1	2	1995.01	1.71126	4058	4058	60.0985	MS2	14/34
	TSAEQIDYLEELVNK	2	1	CID		47.6233	2.12939	0	1	2	1751.87	-3.10448	2856	2856	49.1492	MS2	14/28
	FEGTEDGVETILAAIEAAGYVPGK	2	1	CID		17.8594	2.02434	0	1	3	2437.21	-1.12687	5400	5400	72.7147	MS2	20/92
	VNQIGTLTETFEAIEmAK	2	1	CID	M16(Oxidation)	44.925	1.628	0	1	3	2011.01	2.08311	4215	4215	61.5067	MS2	17/68
	AVDNVNNIIAEAIIGYDVR	2	1	CID		6.92411	1.22607	0.0137166	2	3	2059.09	3.84725	4516	4516	64.1851	MS2	17/72
gi225855846	17.09	22	1311	26.2822	beta-N-acetylhexosaminidase [Streptococcus pneumoniae P1031]
	Sequence	# Proteins	# Protein Groups	Activation Type	Modifications	Probability	XCorr	Δ Score	Rank	Charge	MH+ [Da]	ΔM [ppm]	First Scan	Last Scan	RT [min]	MSOrder	Ions Matched	Annotation
	AYYDDPNGTALTQAEVTELIEYAK	14	1	CID		46.9669	4.57371	0	1	3	2675.27	1.03932	4187	4187	61.2613	MS2	34/92
	HFANANAEYFAADYESAEQALNEVPK	11	1	CID		110.812	3.95773	0	1	3	2899.32	0.731876	3617	3617	56.2108	MS2	29/100
	AALQGLKPAATHSGSLDENEVAANVETRPELITR	13	1	CID		14.588	3.36089	0	1	4	3558.85	1.44054	2054	2054	40.4707	MS2	35/198
	HFANANAEYFAADYESAEQALNEVPK	11	1	CID		104.767	2.94222	0	1	3	2899.32	-0.366757	3963	3963	59.2226	MS2	24/100
	AYYDDPNGTALTQAEVTELIEYAK	14	1	CID		95.2613	2.44142	0	1	2	2675.28	3.06692	3871	3871	58.402	MS2	19/46
	GTNDYYNDPNGNHLTESQmTDLINYAK	13	1	CID	M19(Oxidation)	30.0873	2.39655	0	1	3	3104.36	1.55557	1790	1790	37.1053	MS2	23/104
	AYYDDPNGTALTQAEVTELIEYAK	14	1	CID		29.6717	2.35051	0	1	3	2675.26	-12.8767	3852	3852	58.2529	MS2	16/92
	GTNDYYNDPNGNHLTESQMTDLINYAK	13	1	CID		27.2651	2.31763	0	1	3	3088.36	5.50377	2569	2569	46.2799	MS2	18/104
	AALQGLKPAATHSGSLDENEVAANVETRPELITR	13	1	CID		15.9234	2.01102	0	1	5	3558.85	0.206389	2047	2047	40.3952	MS2	33/264
	TEGADIPIIGGmVAAWADTPSAR	14	1	CID	M12(Oxidation)	78.5482	1.94157	0	1	2	2315.13	0.558643	3308	3308	53.4277	MS2	19/44
	AYYDDPNGTALTQAEVTELIEYAK	14	1	CID		39.7734	1.87122	0	1	3	2675.26	-15.2571	4527	4527	64.2706	MS2	18/92
	SHGLKPmAFNDGIYYNSDTSFGSFDK	14	1	CID	M7(Oxidation)	11.0913	1.70983	0	1	4	2914.29	-6.08891	2368	2368	44.1011	MS2	25/150
	HFANANAEYFAADYESAEQALNEVPK	11	1	CID		33.6811	1.61026	0	1	3	2899.32	7.68988	4305	4305	62.3036	MS2	20/100
	KTEIFNIGLDEYANDATDAK	14	1	CID		45.1598	1.40632	0	1	3	2228.07	-1.85086	2330	2330	43.7116	MS2	23/76
	AYYDDPNGTALTQAEVTELIEYAK	14	1	CID		104.449	1.37261	0	1	2	2675.27	1.84622	4204	4204	61.4109	MS2	21/46
	TVDLDNEQAVAFTK	12	1	CID		14.723	1.11764	0	2	2	1550.77	-0.172451	1520	1520	33.1537	MS2	12/26
	EEEIFELMTAFADHNK	14	1	CID		2.46262	1.03077	0.396402	4	3	1923.88	1.85844	4686	4686	65.7363	MS2	6/60
	HFANANAEYFAADYESAEQALNEVPK	11	1	CID		21.1573	1.01305	0	1	3	2899.32	6.40815	4988	4988	68.592	MS2	15/100
	TVDLDNEQAVAFTK	12	1	CID		7.40133	0.731293	0	2	2	1550.77	1.17032	1316	1316	30.0734	MS2	7/26
	ELGIqNPNFSYFGK	14	1	CID	Q5(Deamidated)	5.71135	0.708171	0.651034	2	2	1614.77	-12.7699	2985	2985	50.3765	MS2	4/26
	ELGIQNPnFSYFGK	14	1	CID	N8(Deamidated)	5.71135	0.638046	0.68559	3	2	1614.77	-12.7699	2985	2985	50.3765	MS2	4/26
	ELGIQnPNFSYFGK	14	1	CID	N6(Deamidated)	5.71135	0.613755	0.697559	4	2	1614.77	-12.7699	2985	2985	50.3765	MS2	3/26
gi225857997	7.05	12	638	24.896	surface protein PspA [Streptococcus pneumoniae 70585]
	Sequence	# Proteins	# Protein Groups	Activation Type	Modifications	Probability	XCorr	Δ Score	Rank	Charge	MH+ [Da]	ΔM [ppm]	First Scan	Last Scan	RT [min]	MSOrder	Ions Matched	Annotation
	NSDGEYSALYLEAAEK	1	1	CID		105.041	4.28699	0	1	2	1759.8	-0.84417	1889	1889	38.4415	MS2	23/30
	LEELSDKIDELDAEIAKLEK	1	1	CID		44.5929	4.2267	0	1	3	2301.21	7.64764	4108	4108	60.5458	MS2	31/76
	NSDGEYSALYLEAAEK	1	1	CID		102.242	4.12589	0	1	2	1759.8	0.132393	2139	2139	41.4643	MS2	23/30
	LEELSDKIDELDAEIAKLEK	1	1	CID		36.2925	3.45817	0	1	4	2301.21	3.54484	4091	4091	60.4001	MS2	33/114
	DVEDFKNSDGEYSALYLEAAEK	1	1	CID		36.9127	2.4128	0	1	3	2493.13	-4.52162	2560	2560	46.1883	MS2	24/84
	LEELSDKIDELDAEIAK	3	1	CID		17.533	2.36774	0.0293298	3	3	1930.99	1.56547	2600	2600	46.6002	MS2	20/64
	NSDGEYSALYLEAAEK	1	1	CID		27.7472	2.14385	0	1	2	1759.81	3.42829	2405	2405	44.4854	MS2	12/30
	LEELSDKIDELDAEIAK	3	1	CID		11.529	1.91447	0	1	3	1930.99	1.01615	2943	2943	49.9705	MS2	19/64
	LSKLEELSDKIDELDAEIAKLEK	1	1	CID		7.1939	1.91064	0	1	4	2629.42	-1.95876	4913	4913	67.8446	MS2	22/132
	DVEDFKNSDGEYSALYLEAAEK	1	1	CID		36.5948	1.90004	0	1	3	2493.12	-9.09926	2283	2283	43.152	MS2	21/84
	NSDGEYSALYLEAAEK	1	1	CID		8.00541	1.87382	0	1	2	1759.8	0.498603	1661	1661	35.4359	MS2	15/30
	LSKLEELSDKIDELDAEIAKLEK	1	1	CID		14.8215	1.3492	0	1	5	2629.42	-0.507361	4603	4603	64.9705	MS2	39/176
gi182683062	10.45	6	354	22.4426	hypothetical protein SPCG_0092 [Streptococcus pneumoniae CGSP14]
	Sequence	# Proteins	# Protein Groups	Activation Type	Modifications	Probability	XCorr	Δ Score	Rank	Charge	MH+ [Da]	ΔM [ppm]	First Scan	Last Scan	RT [min]	MSOrder	Ions Matched	Annotation
	NTQLEEEVSQAEVELESQQEEK	3	1	CID		144.105	6.51531	0	1	3	2576.19	0.635587	3024	3024	50.7688	MS2	37/84
	NTQLEEEVSQAEVELESQQEEK	3	1	CID		134.717	5.39879	0	1	3	2576.19	1.0018	3346	3346	53.7826	MS2	34/84
	NTQLEEEVSQAEVELESQQEEK	3	1	CID		136.69	4.01809	0	1	2	2576.19	0.649033	3229	3229	52.7317	MS2	22/42
	NTQLEEEVSQAEVELESQQEEK	3	1	CID		109.008	3.49506	0	1	2	2576.18	-1.79237	2917	2917	49.7487	MS2	21/42
	NTQLEEEVSQAEVELESQQEEK	3	1	CID		60.7707	3.01535	0	1	2	2576.18	-2.52479	3567	3567	55.7747	MS2	19/42
	VTIAEESQEALPQQK	4	1	CID		2.94306	1.51167	0	1	2	1670.86	2.96513	990	990	24.6045	MS2	9/28
gi307127876	4.53	7	419	21.8496	cell division protein FtsZ [Streptococcus pneumoniae 670-6B]
	Sequence	# Proteins	# Protein Groups	Activation Type	Modifications	Probability	XCorr	Δ Score	Rank	Charge	MH+ [Da]	ΔM [ppm]	First Scan	Last Scan	RT [min]	MSOrder	Ions Matched	Annotation
	FEAPISQDEDELDTPPFFK	4	1	CID		139.015	4.73807	0	1	2	2225.03	-2.16651	3480	3480	54.9268	MS2	22/36
	FEAPISQDEDELDTPPFFK	4	1	CID		112.523	3.99143	0	1	2	2225.03	-2.16651	3820	3820	57.9588	MS2	20/36
	FEAPISQDEDELDTPPFFK	4	1	CID		85.2093	3.44759	0	1	2	2225.03	-0.213389	4155	4155	60.9727	MS2	18/36
	FEAPISQDEDELDTPPFFK	4	1	CID		49.2956	2.72055	0	1	2	2225.03	-0.945811	4502	4502	64.0535	MS2	16/36
	FEAPISQDEDELDTPPFFK	4	1	CID		54.5527	2.52051	0	1	3	2225.03	-1.81375	3242	3242	52.8344	MS2	20/72
	FEAPISQDEDELDTPPFFK	4	1	CID		54.0763	2.21824	0	1	2	2225.03	-1.92237	5231	5231	70.9881	MS2	13/36
	FEAPISQDEDELDTPPFFK	4	1	CID		31.4663	2.21321	0	1	2	2225.03	1.98388	3148	3148	51.9151	MS2	13/36
gi225858942	12.97	12	1943	19.0671	immunoglobulin A1 protease [Streptococcus pneumoniae 70585]
	Sequence	# Proteins	# Protein Groups	Activation Type	Modifications	Probability	XCorr	Δ Score	Rank	Charge	MH+ [Da]	ΔM [ppm]	First Scan	Last Scan	RT [min]	MSOrder	Ions Matched	Annotation
	AINQNPSGTYHLAASLNANEVELGPDER	4	2	CID		47.6342	3.63637	0	1	3	2980.44	1.92117	2200	2200	42.2234	MS2	24/108
	GEPAVQPELPEAVVSDKGEPEQVAPLPEYK	1	1	CID		19.2449	3.01793	0	1	3	3202.61	-2.81521	2567	2567	46.2587	MS2	25/116
	SDQTVGGLAGLVDQDAHIQNSYAEGDINNVK	2	1	CID		22.0473	2.97299	0	1	3	3228.54	-2.92053	2795	2795	48.5376	MS2	28/120
	HAGELTNVLSDVNVTNGNAITGYHYTGmK	2	1	CID	M28(Oxidation)	3.38808	2.78063	0	1	4	3092.48	10.2215	2603	2603	46.6373	MS2	26/168
	IDFQEEIQENPDLAEGTVR	9	3	CID		63.691	2.54433	0	1	2	2203.05	-3.54214	2221	2221	42.4501	MS2	18/36
	GVPEVQPALPEAVVTDKGEPAIQPELPEAVVTDK	1	1	CID		31.182	2.09542	0	1	3	3522.85	-5.45912	3258	3258	52.9742	MS2	19/132
	IDFQEEIQENPDLAEGTVR	9	3	CID		41.6205	2.01948	0	1	3	2203.05	1.38826	2302	2302	43.4035	MS2	23/72
	NNVDTYGISLASQHGTTDLFSTLEHYR	3	2	CID		5.51808	1.46645	0.0550118	2	4	3039.45	1.8364	3752	3752	57.3599	MS2	23/156
	KVFLPnTSnnDWFKSETK	4	2	CID	N6(Deamidated) N9(Deamidated) N10(Deamidated)	20.1872	1.29333	0.373582	5	3	2158.03	-7.33382	5257	5257	71.2553	MS2	13/68
	nVAISGKNDIGSLANEATNGTK	3	2	CID	N1(Deamidated)	7.40872	0.762882	0.577297	3	2	2175.07	-15.1092	5451	5451	73.1704	MS2	5/42
	NVAISGKnDIGSLANEATNGTK	3	2	CID	N8(Deamidated)	2.02853	0.737794	0.591198	4	2	2175.07	-15.1092	5451	5451	73.1704	MS2	6/42
	YVDNFTFYLDKKAK	4	3	CID		2.21717	0.517363	0	1	2	1751.89	-12.9746	2113	2113	41.1756	MS2	6/26
gi307126444	16.29	5	178	18.643	50S ribosomal protein L6 [Streptococcus pneumoniae 670-6B]
	Sequence	# Proteins	# Protein Groups	Activation Type	Modifications	Probability	XCorr	Δ Score	Rank	Charge	MH+ [Da]	ΔM [ppm]	First Scan	Last Scan	RT [min]	MSOrder	Ions Matched	Annotation
	SHPDEVEAPEGITFELPNPTTIVVSGISK	6	1	CID		29.9298	4.32269	0	1	3	3063.55	0.354122	4881	4881	67.5561	MS2	32/112
	SHPDEVEAPEGITFELPNPTTIVVSGISK	6	1	CID		37.1	4.20626	0	1	3	3063.55	-0.3783	4555	4555	64.5406	MS2	33/112
	SHPDEVEAPEGITFELPNPTTIVVSGISK	6	1	CID		39.4378	4.15947	0	1	3	3063.55	1.63586	4217	4217	61.5252	MS2	34/112
	SHPDEVEAPEGITFELPNPTTIVVSGISK	6	1	CID		8.8974	3.27475	0	1	3	3063.55	-2.20935	6891	6891	87.9799	MS2	32/112
	SHPDEVEAPEGITFELPNPTTIVVSGISK	6	1	CID		41.9377	2.67982	0	1	3	3063.55	-0.744511	5189	5189	70.5992	MS2	26/112
gi307126677	14.21	11	774	16.3948	formate acetyltransferase [Streptococcus pneumoniae 670-6B]
	Sequence	# Proteins	# Protein Groups	Activation Type	Modifications	Probability	XCorr	Δ Score	Rank	Charge	MH+ [Da]	ΔM [ppm]	First Scan	Last Scan	RT [min]	MSOrder	Ions Matched	Annotation
	GTFTESEIQEFVDDFVmK	6	1	CID	M17(Oxidation)	81.7728	4.15342	0	1	2	2137.96	-3.28362	5366	5366	72.3967	MS2	23/34
	GTFTESEIQEFVDDFVmK	6	1	CID	M17(Oxidation)	87.4725	4.05169	0	1	2	2137.96	-2.5512	5060	5060	69.3634	MS2	19/34
	GTFTESEIQEFVDDFVmK	6	1	CID	M17(Oxidation)	32.5497	3.63119	0	1	3	2137.96	0.24297	5374	5374	72.4711	MS2	28/68
	GTFTESEIQEFVDDFVmK	6	1	CID	M17(Oxidation)	28.8815	2.62759	0	1	3	2137.96	0.975391	5071	5071	69.463	MS2	23/68
	DEDGYIYDYETIGDYPR	6	1	CID		77.2718	1.93093	0	1	2	2083.88	-1.47956	2717	2717	47.8118	MS2	17/32
	DEDGYIYDYETIGDYPR	6	1	CID		24.0593	1.34587	0	1	2	2083.87	-4.65339	2431	2431	44.7659	MS2	11/32
	FVQANYTPYDGDESFLAGPTER	6	1	CID		11.5906	1.29907	0	1	3	2477.12	-2.20406	2520	2520	45.7443	MS2	16/84
	ENEVIFGIQNDELFK	6	1	CID		26.5018	1.22289	0	1	2	1794.89	-0.146631	3156	3156	52.0101	MS2	9/28
	WGEDDPRSnELAEWLIEAYTTRLR	6	1	CID	N9(Deamidated)	4.09712	0.998503	0	1	3	2921.42	9.67558	3495	3495	55.0676	MS2	11/92
	SnELAEWLIEAYTTR	6	1	CID	N2(Deamidated)	3.09741	0.831916	0	1	2	1796.87	0.954049	2519	2519	45.7384	MS2	5/28
	GVYLNEDGSVNLSK	6	1	CID		5.79144	0.535864	0	1	2	1494.74	0.788994	1236	1236	28.8828	MS2	5/26
gi307128491	18.5	4	492	15.5598	inosine-5'-monophosphate dehydrogenase [Streptococcus pneumoniae 670-6B]
	Sequence	# Proteins	# Protein Groups	Activation Type	Modifications	Probability	XCorr	Δ Score	Rank	Charge	MH+ [Da]	ΔM [ppm]	First Scan	Last Scan	RT [min]	MSOrder	Ions Matched	Annotation
	FISDYNQPISNHmTSENLVTAPVGTDLATAESILQEHR	2	1	CID	M13(Oxidation)	19.5243	4.54246	0	1	4	4215.03	3.2896	4083	4083	60.3278	MS2	36/222
	FISDYNQPISNHmTSENLVTAPVGTDLATAESILQEHR	2	1	CID	M13(Oxidation)	25.4608	3.62344	0	1	4	4215.01	-17.2182	4430	4430	63.405	MS2	30/222
	GFTFDDVLLIPAESHVLPNDADLTTK	2	1	CID		50.3633	2.78969	0	1	3	2828.44	3.90287	4847	4847	67.2173	MS2	23/100
	SENGVIIDPFFLTPEHTIAEADELmGR	2	1	CID	M25(Oxidation)	55.2927	2.66998	0	1	3	3017.45	-2.28369	4666	4666	65.5398	MS2	21/104
gi307127191	11.59	5	328	15.3176	L-lactate dehydrogenase [Streptococcus pneumoniae 670-6B]
	Sequence	# Proteins	# Protein Groups	Activation Type	Modifications	Probability	XCorr	Δ Score	Rank	Charge	MH+ [Da]	ΔM [ppm]	First Scan	Last Scan	RT [min]	MSOrder	Ions Matched	Annotation
	DTQNVQEAELIELFEGVR	3	1	CID		98.2698	3.57901	0	1	3	2090.04	4.20438	4586	4586	64.8276	MS2	29/68
	DTQNVQEAELIELFEGVR	3	1	CID		74.2012	3.49004	0	1	2	2090.05	5.07231	4388	4388	63.0272	MS2	19/34
	DTQNVQEAELIELFEGVR	3	1	CID		64.8393	3.38119	0	1	2	2090.04	1.65435	4910	4910	67.8191	MS2	20/34
	DTQNVQEAELIELFEGVR	3	1	CID		70.0715	2.4489	0	1	3	2090.04	-0.190155	4912	4912	67.8383	MS2	26/68
	ELQAIIDEAWKNPEFQEASK	3	1	CID		18.8915	2.4185	0	1	3	2346.15	-8.83133	3076	3076	51.2489	MS2	18/76
gi225859283	9.51	8	652	15.1661	oligopeptide binding lipoprotein [Streptococcus pneumoniae 70585]
	Sequence	# Proteins	# Protein Groups	Activation Type	Modifications	Probability	XCorr	Δ Score	Rank	Charge	MH+ [Da]	ΔM [ppm]	First Scan	Last Scan	RT [min]	MSOrder	Ions Matched	Annotation
	SEALYLVQDSVAGLDDYITGK	7	1	CID		65.5565	4.45459	0	1	3	2257.13	3.09977	4843	4843	67.1799	MS2	36/80
	SEALYLVQDSVAGLDDYITGK	7	1	CID		110.089	4.348	0	1	2	2257.13	3.47942	4814	4814	66.9014	MS2	22/40
	SEALYLVQDSVAGLDDYITGK	7	1	CID		74.0527	3.96855	0	1	2	2257.12	-0.182686	5118	5118	69.9198	MS2	25/40
	SEALYLVQDSVAGLDDYITGK	7	1	CID		29.7652	2.39501	0	1	3	2257.12	-2.21029	5190	5190	70.6052	MS2	20/80
	AVGLDVYTQmLEEANK	4	1	CID	M10(Oxidation)	14.6571	1.46415	0	1	2	1796.87	0.738877	1969	1969	39.4188	MS2	10/30
	NLVVPPNFVSIK	6	1	CID		11.3308	0.787592	0	1	2	1326.78	6.16599	2564	2564	46.2322	MS2	4/22
	AVGLDVYTQMLEEANKEQDPAK	4	1	CID		10.77	0.726224	0.527386	5	3	2449.19	-5.88717	3289	3289	53.2797	MS2	10/84
	AREKWLK	16	2	CID		4.10993	0.717364	0	1	2	930.548	-3.868	1427	1427	31.9504	MS2	4/12
gi307128212	36.72	9	335	13.8958	glyceraldehyde-3-phosphate dehydrogenase, type I [Streptococcus pneumoniae 670-6B]
	Sequence	# Proteins	# Protein Groups	Activation Type	Modifications	Probability	XCorr	Δ Score	Rank	Charge	MH+ [Da]	ΔM [ppm]	First Scan	Last Scan	RT [min]	MSOrder	Ions Matched	Annotation
	AASNESYGYTEDPIVSSDIVGmSYGSLFDATQTK	6	1	CID	M22(Oxidation)	88.8391	4.41977	0	1	3	3619.63	5.93139	4080	4080	60.2967	MS2	35/132
	ALQDNFGVVEGLmTTIHAYTGDQmILDGPHR	6	1	CID	M13(Oxidation) M24(Oxidation)	38.9991	2.80357	0	1	3	3431.64	-0.418066	4227	4227	61.6037	MS2	18/120
	AASNESYGYTEDPIVSSDIVGmSYGSLFDATQTK	6	1	CID	M22(Oxidation)	18.4136	2.54596	0	1	3	3619.63	-1.39283	3741	3741	57.2628	MS2	21/132
	DPEQIDWATDGVEIVLEATGFFAK	6	1	CID		20.9717	2.10501	0	1	3	2651.29	-0.354667	5772	5772	76.2437	MS2	19/92
	VPTPTGSVTELVAVLEK	6	1	CID		33.5165	2.02148	0	1	2	1739.98	1.60712	4053	4053	60.0579	MS2	13/32
	ALQDNFGVVEGLmTTIHAYTGDQmILDGPHR	6	1	CID	M13(Oxidation) M24(Oxidation)	13.6816	1.93411	0	1	4	3431.63	-2.3236	4225	4225	61.5859	MS2	31/180
	ALQDNFGVVEGLMTTIHAYTGDQmILDGPHR	6	1	CID	M24(Oxidation)	33.6442	1.64778	0.233833	2	3	3415.63	-11.4845	5314	5314	71.9032	MS2	21/120
	ALQDNFGVVEGLmTTIHAYTGDQMILDGPHR	6	1	CID	M13(Oxidation)	33.6442	1.23096	0.427643	3	3	3415.63	-11.4845	5314	5314	71.9032	MS2	22/120
	VVSWYDNEmSYTAqLVR	6	1	CID	M9(Oxidation) Q14(Deamidated)	7.30621	0.890108	0	1	2	2077.97	13.4863	2772	2772	48.3238	MS2	6/32
gi307127424	15.43	4	324	12.5768	hypothetical protein SP670_1294 [Streptococcus pneumoniae 670-6B]
	Sequence	# Proteins	# Protein Groups	Activation Type	Modifications	Probability	XCorr	Δ Score	Rank	Charge	MH+ [Da]	ΔM [ppm]	First Scan	Last Scan	RT [min]	MSOrder	Ions Matched	Annotation
	VIDETYVQPEYVLGSSLSEDQK	9	1	CID		93.8166	3.57575	0	1	2	2499.21	-0.608936	2599	2599	46.5942	MS2	23/42
	VIDETYVQPEYVLGSSLSEDQK	9	1	CID		35.656	2.69866	0	1	3	2499.21	-2.88068	2889	2889	49.5056	MS2	22/84
	ITVAAPIPVTGESALAGIYYSLEANGAK	9	1	CID		12.7035	2.39272	0	1	3	2776.47	-6.73437	4873	4873	67.4889	MS2	20/108
	ITVAAPIPVTGESALAGIYYSLEANGAK	9	1	CID		30.9449	1.6346	0	1	2	2776.49	10.491	4953	4953	68.2106	MS2	12/54
gi307128231	5.93	5	658	12.5116	transketolase [Streptococcus pneumoniae 670-6B]
	Sequence	# Proteins	# Protein Groups	Activation Type	Modifications	Probability	XCorr	Δ Score	Rank	Charge	MH+ [Da]	ΔM [ppm]	First Scan	Last Scan	RT [min]	MSOrder	Ions Matched	Annotation
	DPVEVTPADFPALENGFSQATR	9	1	CID		57.6608	2.75416	0	1	3	2361.14	1.45092	3589	3589	55.9639	MS2	27/84
	DPVEVTPADFPALENGFSQATR	9	1	CID		16.0704	2.56312	0	1	2	2361.15	11.169	3307	3307	53.4216	MS2	16/42
	EAHPELAAEVEAIIDGR	7	1	CID		36.6743	2.53442	0	1	3	1819.92	3.27682	3600	3600	56.0595	MS2	24/64
	DPVEVTPADFPALENGFSQATR	9	1	CID		22.9284	2.48246	0	1	2	2361.14	8.23927	3912	3912	58.7614	MS2	11/42
	EAHPELAAEVEAIIDGR	7	1	CID		48.0177	2.17743	0	1	3	1819.92	0.896446	3947	3947	59.0714	MS2	22/64
gi307127874	9.5	4	179	12.1452	YlmF protein [Streptococcus pneumoniae 670-6B]
	Sequence	# Proteins	# Protein Groups	Activation Type	Modifications	Probability	XCorr	Δ Score	Rank	Charge	MH+ [Da]	ΔM [ppm]	First Scan	Last Scan	RT [min]	MSOrder	Ions Matched	Annotation
	FIDYFTEDEDSSLPYEK	4	1	CID		121.934	4.85821	0	1	2	2097.92	-0.0632325	2897	2897	49.5943	MS2	23/32
	FIDYFTEDEDSSLPYEK	4	1	CID		89.5867	3.31346	0	1	2	2097.91	-4.21362	3217	3217	52.6204	MS2	19/32
	FIDYFTEDEDSSLPYEK	4	1	CID		73.1241	2.3323	0	1	2	2097.92	-2.01636	2598	2598	46.5881	MS2	17/32
	FIDYFTEDEDSSLPYEK	4	1	CID		9.51541	1.64125	0	1	2	2097.91	-10.5613	3601	3601	56.0656	MS2	16/32
gi307127077	22.95	3	122	11.6698	50S ribosomal protein L7/L12 [Streptococcus pneumoniae 670-6B]
	Sequence	# Proteins	# Protein Groups	Activation Type	Modifications	Probability	XCorr	Δ Score	Rank	Charge	MH+ [Da]	ΔM [ppm]	First Scan	Last Scan	RT [min]	MSOrder	Ions Matched	Annotation
	AIEEEFGVTAAAPVAVAAADAADAGAAK	2	1	CID		115.233	4.29999	0	1	3	2557.28	1.85215	3075	3075	51.2428	MS2	35/108
	AIEEEFGVTAAAPVAVAAADAADAGAAK	2	1	CID		89.6642	3.8035	0	1	2	2557.27	-3.74964	3073	3073	51.2241	MS2	22/54
	AIEEEFGVTAAAPVAVAAADAADAGAAK	2	1	CID		42.8402	3.5663	0	1	3	2557.29	8.81016	3401	3401	54.2596	MS2	31/108
gi225860983	5.63	4	852	10.7221	pneumococcal histidine triad protein B [Streptococcus pneumoniae Taiwan19F-14]
	Sequence	# Proteins	# Protein Groups	Activation Type	Modifications	Probability	XCorr	Δ Score	Rank	Charge	MH+ [Da]	ΔM [ppm]	First Scan	Last Scan	RT [min]	MSOrder	Ions Matched	Annotation
	NELSASELAAAEAFLSGR	14	4	CID		92.3634	3.54121	0	1	2	1835.91	-0.836045	4265	4265	61.9474	MS2	20/34
	QVDFEALDNLLER	21	5	CID		53.4336	2.46582	0	1	2	1561.79	1.78188	3805	3805	57.8389	MS2	16/24
	DNNTISAEVDSLLALLK	13	4	CID		19.8397	2.39792	0	1	2	1815.97	-0.63542	5589	5589	74.4249	MS2	15/32
	NELSASELAAAEAFLSGR	14	4	CID		51.9285	2.31718	0	1	2	1835.91	-2.30089	4623	4623	65.1469	MS2	14/34
gi307128477	23.7	5	346	10.6427	translation elongation factor Ts [Streptococcus pneumoniae 670-6B]
	Sequence	# Proteins	# Protein Groups	Activation Type	Modifications	Probability	XCorr	Δ Score	Rank	Charge	MH+ [Da]	ΔM [ppm]	First Scan	Last Scan	RT [min]	MSOrder	Ions Matched	Annotation
	VIAEGKPANNEEALALImPSGETLEAAYVSATATIGEK	2	1	CID	M18(Oxidation)	58.3301	3.81248	0	1	3	3874.96	-0.748769	4593	4593	64.8955	MS2	35/148
	ELDEQFVKDELAQLNHVIDQDNESR	3	1	CID		100.442	3.78591	0	1	3	2984.42	0.408907	4467	4467	63.7503	MS2	30/96
	ELDEQFVKDELAQLNHVIDQDNESR	3	1	CID		41.938	3.04435	0	1	4	2984.42	-0.336961	4705	4705	65.9176	MS2	33/144
	VIAEGKPANNEEALALImPSGETLEAAYVSATATIGEK	2	1	CID	M18(Oxidation)	2.512	1.35102	0	1	4	3874.97	9.79687	4589	4589	64.8593	MS2	24/222
	AANDFEAEVAATmAAALNN	3	1	CID	M13(Oxidation)	35.0466	1.29552	0	1	2	1909.86	1.38528	2769	2769	48.2978	MS2	13/36
gi307128359	11.96	5	418	10.5812	tyrosyl-tRNA synthetase [Streptococcus pneumoniae 670-6B]
	Sequence	# Proteins	# Protein Groups	Activation Type	Modifications	Probability	XCorr	Δ Score	Rank	Charge	MH+ [Da]	ΔM [ppm]	First Scan	Last Scan	RT [min]	MSOrder	Ions Matched	Annotation
	IQDLDYVLSDADKLENELTVIR	4	1	CID		129.104	5.91676	0	1	3	2562.33	-0.288339	5066	5066	69.4156	MS2	42/84
	GVPNYQVQADEHNNIVELLVSSGIVNSK	2	1	CID		15.2946	2.40312	0	1	3	3023.53	-8.48607	4145	4145	60.881	MS2	20/108
	IQDLDYVLSDADKLENELTVIR	4	1	CID		47.1586	2.2613	0	1	2	2562.33	1.00685	5067	5067	69.4218	MS2	15/42
	GVPNYQVQADEHNNIVELLVSSGIVNSK	2	1	CID		22.1736	2.02824	0.0525129	2	4	3023.55	2.91405	4210	4210	61.4577	MS2	33/162
	IQDLDYVLSDADKLENELTVIR	4	1	CID		16.718	1.90917	0	1	4	2562.33	-0.362821	5048	5048	69.2332	MS2	26/126
gi225858338	6.97	5	1622	10.5441	endo-beta-N-acetylglucosaminidase D [Streptococcus pneumoniae 70585]
	Sequence	# Proteins	# Protein Groups	Activation Type	Modifications	Probability	XCorr	Δ Score	Rank	Charge	MH+ [Da]	ΔM [ppm]	First Scan	Last Scan	RT [min]	MSOrder	Ions Matched	Annotation
	DYQFNLGQLTISDNHQEPQSPTSFSVVK	12	1	CID		26.6842	3.16308	0	1	3	3179.53	6.41772	3348	3348	53.7948	MS2	32/108
	DTSLPKPLAENIVPGATVIDSTFPK	11	1	CID		13.6962	2.95354	0	1	3	2610.4	0.346954	3498	3498	55.0921	MS2	25/96
	SEVGGDLASAPLDLTNQSGLLYYR	12	1	CID		84.0784	2.3271	0	1	2	2539.27	2.73997	3537	3537	55.4785	MS2	17/46
	VQVGFADVPAGATITVYDNPNSQIPLATLK	1	1	CID		3.6769	1.96214	0	1	3	3099.64	3.14611	4041	4041	59.9564	MS2	16/116
	LVDMAK	13	1	CID		1.96789	0.41441	0	1	1	676.376	5.8001	1653	1653	35.3317	MS2	3/10
gi307126187	7.52	3	652	10.4785	ATP-dependent metallopeptidase HflB [Streptococcus pneumoniae 670-6B]
	Sequence	# Proteins	# Protein Groups	Activation Type	Modifications	Probability	XCorr	Δ Score	Rank	Charge	MH+ [Da]	ΔM [ppm]	First Scan	Last Scan	RT [min]	MSOrder	Ions Matched	Annotation
	FSDVAGAEEEKQELVEVVEFLK	6	1	CID		115.725	4.43819	0	1	3	2495.26	-0.0281242	4746	4746	66.2672	MS2	31/84
	LVAQQTPGFVGADLENVLNEAALVAAR	6	1	CID		66.5358	3.68616	0	1	3	2766.48	-0.193593	5417	5417	72.846	MS2	28/104
	QELVEVVEFLK	6	1	CID		10.8804	0.551076	0	1	2	1332.74	0.613447	3312	3312	53.4653	MS2	8/20
gi225859256	6.12	5	572	9.98391	phosphomannomutase [Streptococcus pneumoniae 70585]
	Sequence	# Proteins	# Protein Groups	Activation Type	Modifications	Probability	XCorr	Δ Score	Rank	Charge	MH+ [Da]	ΔM [ppm]	First Scan	Last Scan	RT [min]	MSOrder	Ions Matched	Annotation
	AIENPFAVEVADVEIEK	1	1	CID		139.172	3.75589	0	1	2	1872.96	-0.253467	3375	3375	54.0065	MS2	24/32
	AIENPFAVEVADVEIEK	1	1	CID		70.875	2.65379	0	1	3	1872.96	0.0382625	3475	3475	54.8843	MS2	28/64
	AIENPFAVEVADVEIEK	1	1	CID		48.0521	1.7942	0	1	2	1872.96	1.9438	3714	3714	57.0359	MS2	14/32
	ASGLIEVIGEAVDIEYLK	4	1	CID		4.58207	1.78002	0.0414751	2	2	1919.04	3.65985	5131	5131	70.0314	MS2	13/34
	ASGLIEVIGEAVDIEYLK	4	1	CID		30.4063	1.41018	0.159776	3	3	1919.04	4.86711	5351	5351	72.2658	MS2	19/68
gi225859217	24.14	3	203	9.7939	peptide deformylase [Streptococcus pneumoniae 70585]
	Sequence	# Proteins	# Protein Groups	Activation Type	Modifications	Probability	XCorr	Δ Score	Rank	Charge	MH+ [Da]	ΔM [ppm]	First Scan	Last Scan	RT [min]	MSOrder	Ions Matched	Annotation
	TVAEEVTFPLSDQEIILGEK	1	1	CID		31.2486	2.98926	0	1	3	2218.15	2.309	3389	3389	54.1485	MS2	28/76
	TVAEEVTFPLSDQEIILGEK	1	1	CID		20.3933	2.73866	0	1	2	2218.15	-1.27862	3305	3305	53.4095	MS2	16/38
	HSqDPVMAEKMGLRGGVGLAAPqLDISKR	3	1	CID	Q3(Deamidated) Q23(Deamidated)	2.37663	2.0213	0.519453	10	3	3063.55	-19.7303	4555	4555	64.5406	MS2	24/112
gi307126429	33.17	5	208	9.67588	50S ribosomal protein L3 [Streptococcus pneumoniae 670-6B]
	Sequence	# Proteins	# Protein Groups	Activation Type	Modifications	Probability	XCorr	Δ Score	Rank	Charge	MH+ [Da]	ΔM [ppm]	First Scan	Last Scan	RT [min]	MSOrder	Ions Matched	Annotation
	NVEGLEVGAEITVETFAAGDVVDVTGTSK	1	1	CID		57.2258	4.59397	0	1	3	2907.44	-4.38916	6125	6125	79.6099	MS2	33/112
	NVEGLEVGAEITVETFAAGDVVDVTGTSK	1	1	CID		10.8493	2.99157	0	1	3	2907.45	-1.27637	5391	5391	72.6223	MS2	24/112
	TVETDGYNAIQVGFDDK	1	1	CID		24.4145	2.09034	0	1	2	1871.87	7.25317	1843	1843	37.8045	MS2	9/32
	NVEGLEVGAEITVETFAAGDVVDVTGTSK	1	1	CID		21.5617	1.83023	0	1	3	2907.44	-6.40332	6441	6441	82.8757	MS2	23/112
	GPMAHGSRYHRRPGSmGPVAPnR	1	1	CID	M16(Oxidation) N22(Deamidated)	3.34621	1.01298	0	1	3	2505.21	-3.30311	4239	4239	61.7198	MS2	13/88
gi307127859	8.89	3	630	9.30924	endopeptidase O [Streptococcus pneumoniae 670-6B]
	Sequence	# Proteins	# Protein Groups	Activation Type	Modifications	Probability	XCorr	Δ Score	Rank	Charge	MH+ [Da]	ΔM [ppm]	First Scan	Last Scan	RT [min]	MSOrder	Ions Matched	Annotation
	SQTGGFVDLDQEIEDLmLATTDK	9	1	CID	M17(Oxidation)	86.575	4.23433	0	1	2	2542.2	10.9211	4438	4438	63.4696	MS2	20/44
	AYDFSDEEIEDLLEK	9	1	CID		94.3111	3.0107	0	1	2	1815.82	-0.829522	3471	3471	54.8563	MS2	20/28
	WLAGEEVPEDAILENFVK	9	1	CID		22.8817	2.06422	0	1	2	2059.02	-13.6555	4181	4181	61.2145	MS2	12/34
gi307128353	33.11	4	299	9.22548	UTP-glucose-1-phosphate uridylyltransferase [Streptococcus pneumoniae 670-6B]
	Sequence	# Proteins	# Protein Groups	Activation Type	Modifications	Probability	XCorr	Δ Score	Rank	Charge	MH+ [Da]	ΔM [ppm]	First Scan	Last Scan	RT [min]	MSOrder	Ions Matched	Annotation
	DGLYSVETFVEKPAPEDAPSDLAIIGR	5	1	CID		116.868	4.08858	0	1	3	2889.45	0.818536	3605	3605	56.1018	MS2	29/104
	EmLPIVDKPTIQFIVEEALK	6	1	CID	M2(Oxidation)	57.9893	2.73893	0	1	3	2329.28	3.55883	4650	4650	65.3876	MS2	26/76
	AFVGNEPFVVmLGDDLmDITDEK	6	1	CID	M11(Oxidation) M17(Oxidation)	43.653	2.39797	0.174448	3	3	2587.19	-3.50021	5120	5120	69.9321	MS2	20/88
	THASTIAVmPVPHDEVSAYGVIAPQGEGK	5	1	CID	M9(Oxidation)	28.8057	2.21153	0.163657	2	4	2977.47	-0.225555	1806	1806	37.3264	MS2	23/168
gi307126310	10.84	3	203	9.14337	30S ribosomal protein S4 [Streptococcus pneumoniae 670-6B]
	Sequence	# Proteins	# Protein Groups	Activation Type	Modifications	Probability	XCorr	Δ Score	Rank	Charge	MH+ [Da]	ΔM [ppm]	First Scan	Last Scan	RT [min]	MSOrder	Ions Matched	Annotation
	DEINPEINEALVVEFYNK	1	1	CID		131.83	3.49713	0	1	2	2136.05	2.17411	3713	3713	57.0299	MS2	24/34
	LPERDEINPEINEALVVEFYNK	1	1	CID		50.0942	3.19586	0	1	3	2631.33	-0.628339	3656	3656	56.5534	MS2	25/84
	LPERDEINPEINEALVVEFYNK	1	1	CID		78.0804	2.45038	0	1	3	2631.33	-0.262128	3319	3319	53.5337	MS2	25/84
gi307126916	8.63	3	591	9.09624	pyruvate oxidase [Streptococcus pneumoniae 670-6B]
	Sequence	# Proteins	# Protein Groups	Activation Type	Modifications	Probability	XCorr	Δ Score	Rank	Charge	MH+ [Da]	ΔM [ppm]	First Scan	Last Scan	RT [min]	MSOrder	Ions Matched	Annotation
	KGPAVVEIPVNFGFQEIDENSYYGSGSYER	4	1	CID		53.0824	3.58016	0	1	3	3351.56	-22.4727	3734	3734	57.2083	MS2	29/116
	KGPAVVEIPVNFGFQEIDENSYYGSGSYER	4	1	CID		68.1569	3.36266	0	1	3	3351.58	0.964786	4078	4078	60.2788	MS2	28/116
	HADQDAIYSIDVGNTTQTSTR	4	1	CID		20.3989	2.15342	0	1	3	2293.07	0.493966	1361	1361	30.7796	MS2	20/80
gi307128199	21.73	5	336	8.7485	catabolite control protein A [Streptococcus pneumoniae 670-6B]
	Sequence	# Proteins	# Protein Groups	Activation Type	Modifications	Probability	XCorr	Δ Score	Rank	Charge	MH+ [Da]	ΔM [ppm]	First Scan	Last Scan	RT [min]	MSOrder	Ions Matched	Annotation
	LISSNATAAVVTGDELAAGVLNGLADK	6	1	CID		36.9514	3.6791	0	1	3	2570.37	5.13938	4960	4960	68.2949	MS2	25/104
	LISSNATAAVVTGDELAAGVLNGLADK	6	1	CID		77.472	3.0891	0	1	2	2570.37	-0.828623	5013	5013	68.8606	MS2	18/52
	GVSVPEDFEIITSDDSQISR	6	1	CID		58.6153	1.9803	0	1	2	2194.05	-1.24901	2798	2798	48.5638	MS2	12/38
	VLEVIDRLDYRPnAVAR	6	1	CID	N13(Deamidated)	14.0956	1.29989	0	1	2	2000.11	14.9001	4213	4213	61.4887	MS2	7/32
	nVKENTRKK	6	1	CID	N1(Deamidated)	2.12093	0.727883	0	1	2	1117.63	-6.54521	4831	4831	67.0642	MS2	5/16
gi307126488	16.03	3	156	8.39955	30S ribosomal protein S7 [Streptococcus pneumoniae 670-6B]
	Sequence	# Proteins	# Protein Groups	Activation Type	Modifications	Probability	XCorr	Δ Score	Rank	Charge	MH+ [Da]	ΔM [ppm]	First Scan	Last Scan	RT [min]	MSOrder	Ions Matched	Annotation
	EATGNDALEVFETAmENImPVLEVR	2	1	CID	M15(Oxidation) M19(Oxidation)	98.2774	4.8743	0	1	3	2810.32	0.214688	4787	4787	66.6492	MS2	36/96
	EATGNDALEVFETAmENImPVLEVR	2	1	CID	M15(Oxidation) M19(Oxidation)	24.4786	3.52525	0	1	3	2810.31	-12.0534	5179	5179	70.5101	MS2	24/96
	EATGNDALEVFETAmENImPVLEVR	2	1	CID	M15(Oxidation) M19(Oxidation)	72.3655	0.894572	0	1	2	2810.32	-0.626357	4744	4744	66.2492	MS2	11/48
gi307127232	6.67	4	840	8.32422	pneumococcal histidine triad protein B [Streptococcus pneumoniae 670-6B]
	Sequence	# Proteins	# Protein Groups	Activation Type	Modifications	Probability	XCorr	Δ Score	Rank	Charge	MH+ [Da]	ΔM [ppm]	First Scan	Last Scan	RT [min]	MSOrder	Ions Matched	Annotation
	NELSASELAAAEAFLSGR	14	4	CID		92.3634	3.54121	0	1	2	1835.91	-0.836045	4265	4265	61.9474	MS2	20/34
	QVDFEALDNLLER	21	5	CID		53.4336	2.46582	0	1	2	1561.79	1.78188	3805	3805	57.8389	MS2	16/24
	NELSASELAAAEAFLSGR	14	4	CID		51.9285	2.31718	0	1	2	1835.91	-2.30089	4623	4623	65.1469	MS2	14/34
	YYVEHPNERPHSDNGFGNASDHVQR	17	4	CID		31.5674	1.82903	0.0396246	3	4	2925.3	-0.0110237	206	206	8.80818	MS2	25/144
gi307126587	7.81	3	474	8.30921	6-phosphogluconate dehydrogenase, decarboxylating [Streptococcus pneumoniae 670-6B]
	Sequence	# Proteins	# Protein Groups	Activation Type	Modifications	Probability	XCorr	Δ Score	Rank	Charge	MH+ [Da]	ΔM [ppm]	First Scan	Last Scan	RT [min]	MSOrder	Ions Matched	Annotation
	KDDEDQDGPIVDYILDAAGNK	2	1	CID		62.6208	4.76689	0	1	3	2291.07	-0.257441	3458	3458	54.7555	MS2	32/80
	EAYELVSDVLEEISAK	3	1	CID		77.053	3.54231	0	1	2	1794.9	0.217275	4841	4841	67.1615	MS2	20/30
	EAYELVSDVLEEISAK	3	1	CID		8.52388	1.05339	0	1	3	1794.9	2.5842	4734	4734	66.1646	MS2	10/60
gi225854647	9.05	5	862	8.25631	pneumococcal histidine triad protein B [Streptococcus pneumoniae JJA]
	Sequence	# Proteins	# Protein Groups	Activation Type	Modifications	Probability	XCorr	Δ Score	Rank	Charge	MH+ [Da]	ΔM [ppm]	First Scan	Last Scan	RT [min]	MSOrder	Ions Matched	Annotation
	NELSASELAAAEAFLSGR	14	4	CID		92.3634	3.54121	0	1	2	1835.91	-0.836045	4265	4265	61.9474	MS2	20/34
	DNNTISAEVDSLLALLK	13	4	CID		19.8397	2.39792	0	1	2	1815.97	-0.63542	5589	5589	74.4249	MS2	15/32
	NELSASELAAAEAFLSGR	14	4	CID		51.9285	2.31718	0	1	2	1835.91	-2.30089	4623	4623	65.1469	MS2	14/34
	YYVEHPNERPHSDNGFGNASDHVQR	17	4	CID		31.5674	1.82903	0.0396246	3	4	2925.3	-0.0110237	206	206	8.80818	MS2	25/144
	TYDLLARIHqDLLDnKGR	3	3	CID	Q10(Deamidated) N15(Deamidated)	9.66769	1.28867	0.314033	4	3	2143.13	15.4406	4969	4969	68.3705	MS2	11/68
gi225861095	5.99	7	2004	8.20017	immunoglobulin A1 protease [Streptococcus pneumoniae Taiwan19F-14]
	Sequence	# Proteins	# Protein Groups	Activation Type	Modifications	Probability	XCorr	Δ Score	Rank	Charge	MH+ [Da]	ΔM [ppm]	First Scan	Last Scan	RT [min]	MSOrder	Ions Matched	Annotation
	AINQNPSGTYHLAASLNANEVELGPDER	4	2	CID		47.6342	3.63637	0	1	3	2980.44	1.92117	2200	2200	42.2234	MS2	24/108
	IDFQEEIQENPDLAEGTVR	9	3	CID		63.691	2.54433	0	1	2	2203.05	-3.54214	2221	2221	42.4501	MS2	18/36
	IDFQEEIQENPDLAEGTVR	9	3	CID		41.6205	2.01948	0	1	3	2203.05	1.38826	2302	2302	43.4035	MS2	23/72
	NNVDTYGISLASQHGTTDLFSTLEHYR	3	2	CID		5.51808	1.46645	0.0550118	2	4	3039.45	1.8364	3752	3752	57.3599	MS2	23/156
	KVFLPnTSnnDWFKSETK	4	2	CID	N6(Deamidated) N9(Deamidated) N10(Deamidated)	20.1872	1.29333	0.373582	5	3	2158.03	-7.33382	5257	5257	71.2553	MS2	13/68
	YVDNFTFYLDKKAK	4	3	CID		2.21717	0.517363	0	1	2	1751.89	-12.9746	2113	2113	41.1756	MS2	6/26
	KDSDFSKVAYYQAK	2	1	CID		3.41867	0.467118	0.0750672	3	2	1649.81	-2.63265	2921	2921	49.7802	MS2	5/26
gi307127620	11.9	3	269	7.6416	purine nucleoside phosphorylase I, inosine and guanosine-specific [Streptococcus pneumoniae 670-6B]
	Sequence	# Proteins	# Protein Groups	Activation Type	Modifications	Probability	XCorr	Δ Score	Rank	Charge	MH+ [Da]	ΔM [ppm]	First Scan	Last Scan	RT [min]	MSOrder	Ions Matched	Annotation
	FGPGTLmAISDHINmTGQNPLmGENLDDFGPR	4	1	CID	M7(Oxidation) M15(Oxidation) M22(Oxidation)	101.406	4.88111	0	1	3	3493.59	3.00397	3716	3716	57.0539	MS2	39/124
	FGPGTLmAISDHINmTGQNPLMGENLDDFGPR	4	1	CID	M7(Oxidation) M15(Oxidation)	7.6488	2.69809	0.0226045	2	3	3477.58	-11.7246	4017	4017	59.7333	MS2	22/124
	FGPGTLMAISDHINmTGQNPLmGENLDDFGPR	4	1	CID	M15(Oxidation) M22(Oxidation)	15.1611	2.44903	0.112829	3	3	3477.58	-11.7246	4017	4017	59.7333	MS2	20/124
gi307127714	9.58	4	501	7.61577	ATP synthase F1 subunit alpha [Streptococcus pneumoniae 670-6B]
	Sequence	# Proteins	# Protein Groups	Activation Type	Modifications	Probability	XCorr	Δ Score	Rank	Charge	MH+ [Da]	ΔM [ppm]	First Scan	Last Scan	RT [min]	MSOrder	Ions Matched	Annotation
	FEEEFHAFFDAQHPEILETIR	4	1	CID		10.0121	2.83787	0	1	4	2605.24	2.04445	3993	3993	59.5153	MS2	22/120
	FEEEFHAFFDAQHPEILETIR	4	1	CID		54.3145	2.57588	0	1	3	2605.24	7.00174	3711	3711	57.0118	MS2	24/80
	FEEEFHAFFDAQHPEILETIR	4	1	CID		5.73216	2.21115	0	1	4	2605.24	4.97413	3648	3648	56.4882	MS2	24/120
	QQIENFKPNFDVTETGVVTYIGDGIAR	5	1	CID		28.4024	2.20202	0	1	3	3011.52	8.66617	3688	3688	56.8374	MS2	20/104
gi307128357	18.1	3	232	7.61013	tetrahydrodipicolinate N-succinyltransferase [Streptococcus pneumoniae 670-6B]
	Sequence	# Proteins	# Protein Groups	Activation Type	Modifications	Probability	XCorr	Δ Score	Rank	Charge	MH+ [Da]	ΔM [ppm]	First Scan	Last Scan	RT [min]	MSOrder	Ions Matched	Annotation
	DVAPLLEGLVENQDYVVEQDAR	5	1	CID		89.3703	4.34931	0	1	3	2472.23	1.08328	3919	3919	58.8265	MS2	31/84
	DVAPLLEGLVENQDYVVEQDAR	5	1	CID		63.4048	3.26083	0	1	2	2472.23	2.68364	3920	3920	58.8326	MS2	18/42
	MTATKMNAqEIIQFIAnAEK	5	1	CID	Q9(Deamidated) N17(Deamidated)	2.90964	0.554873	0.461465	5	2	2254.11	5.04625	2846	2846	49.0408	MS2	9/38
gi307126804	16.72	5	293	7.48021	fructose-1,6-bisphosphate aldolase, class II [Streptococcus pneumoniae 670-6B]
	Sequence	# Proteins	# Protein Groups	Activation Type	Modifications	Probability	XCorr	Δ Score	Rank	Charge	MH+ [Da]	ΔM [ppm]	First Scan	Last Scan	RT [min]	MSOrder	Ions Matched	Annotation
	LTEALPGFPIVLHGGSGIPDEQIQAAIK	1	1	CID		16.651	2.80671	0	1	3	2871.56	0.851817	4363	4363	62.805	MS2	22/108
	LTEALPGFPIVLHGGSGIPDEQIQAAIK	1	1	CID		7.52022	2.54753	0	1	4	2871.56	2.73046	3991	3991	59.4973	MS2	19/162
	GISVEAEVGTIGGEEDGIIGK	1	1	CID		43.3218	2.12598	0	1	2	2030.03	1.51181	2866	2866	49.2518	MS2	16/40
	LTEALPGFPIVLHGGSGIPDEQIQAAIK	1	1	CID		79.3833	1.97176	0	1	3	2871.56	0.302501	4023	4023	59.7882	MS2	26/108
	GISVEAEVGTIGGEEDGIIGK	1	1	CID		51.9288	1.44631	0	1	2	2030.03	0.291103	2565	2565	46.2378	MS2	15/40
gi307127904	10.19	5	942	7.36941	neuraminidase [Streptococcus pneumoniae 670-6B]
	Sequence	# Proteins	# Protein Groups	Activation Type	Modifications	Probability	XCorr	Δ Score	Rank	Charge	MH+ [Da]	ΔM [ppm]	First Scan	Last Scan	RT [min]	MSOrder	Ions Matched	Annotation
	GEFAYNSLQELGNGEYGILYEHTEK	13	2	CID		32.8392	2.66846	0	1	3	2861.32	-4.41463	3292	3292	53.3123	MS2	21/96
	DLENVETVIEKEDVETNASNGQR	12	2	CID		8.29088	2.48478	0	1	3	2589.23	0.541231	2087	2087	40.8864	MS2	20/88
	TLLFAVDKEDIGQEIIGIAK	10	2	CID		60.3357	2.21618	0	1	3	2173.21	0.366915	4011	4011	59.6722	MS2	27/76
	TWSAPQDITPmVK	12	1	CID	M11(Oxidation)	6.24491	0.952171	0.758609	2	2	1489.73	-9.73862	2920	2920	49.7745	MS2	7/24
	ALTPEEVqKRSqLFK	11	2	CID	Q8(Deamidated) Q12(Deamidated)	2.88819	0.503172	0.289942	2	2	1775.94	-15.4712	2162	2162	41.7491	MS2	5/28
gi182684635	10.51	5	980	7.36941	sialidase A precursor (neuraminidase A) [Streptococcus pneumoniae CGSP14]
	Sequence	# Proteins	# Protein Groups	Activation Type	Modifications	Probability	XCorr	Δ Score	Rank	Charge	MH+ [Da]	ΔM [ppm]	First Scan	Last Scan	RT [min]	MSOrder	Ions Matched	Annotation
	GEFAYNSLQELGNGEYGILYEHTEK	13	2	CID		32.8392	2.66846	0	1	3	2861.32	-4.41463	3292	3292	53.3123	MS2	21/96
	DLENVETVIEKEDVETNASNGQR	12	2	CID		8.29088	2.48478	0	1	3	2589.23	0.541231	2087	2087	40.8864	MS2	20/88
	TLLFAVDKEDIGQEIIGIAK	10	2	CID		60.3357	2.21618	0	1	3	2173.21	0.366915	4011	4011	59.6722	MS2	27/76
	RIFSIYDMFPEGRAVFGmPK	1	1	CID	M18(Oxidation)	9.79442	0.892538	0.656529	2	2	2377.19	8.65583	4478	4478	63.8376	MS2	6/38
	ALTPEEVqKRSqLFK	11	2	CID	Q8(Deamidated) Q12(Deamidated)	2.88819	0.503172	0.289942	2	2	1775.94	-15.4712	2162	2162	41.7491	MS2	5/28
gi307126489	15.01	5	693	7.2342	translation elongation factor G [Streptococcus pneumoniae 670-6B]
	Sequence	# Proteins	# Protein Groups	Activation Type	Modifications	Probability	XCorr	Δ Score	Rank	Charge	MH+ [Da]	ΔM [ppm]	First Scan	Last Scan	RT [min]	MSOrder	Ions Matched	Annotation
	GINPDTDAEETRPASDEEPFAALAFK	3	1	CID		114.912	4.51589	0	1	3	2791.31	1.66797	2895	2895	49.5744	MS2	33/100
	GQFGDVWIEFTPNEEGK	6	1	CID		64.0942	2.71831	0	1	2	1952.91	2.86181	3272	3272	53.1317	MS2	15/32
	SAQPAILEPmmLVTITVPEENLGDVMGHVTAR	6	1	CID	M10(Oxidation) M11(Oxidation)	19.7238	1.61007	0.00435	2	3	3451.72	-6.7392	4394	4394	63.0795	MS2	18/124
	ASTQARGFFKRQSGGK	6	1	CID		2.49749	0.749288	0.137965	2	2	1725.91	-0.0570606	3571	3571	55.804	MS2	3/30
	YLEGEEITNEELK	6	1	CID		20.7156	0.663232	0	1	2	1566.75	-2.88542	1312	1312	30.0218	MS2	8/24
gi307127642	3.4	2	648	6.48894	DNA gyrase subunit B [Streptococcus pneumoniae 670-6B]
	Sequence	# Proteins	# Protein Groups	Activation Type	Modifications	Probability	XCorr	Δ Score	Rank	Charge	MH+ [Da]	ΔM [ppm]	First Scan	Last Scan	RT [min]	MSOrder	Ions Matched	Annotation
	NLQAQDYDASQIQVLEGLEAVR	5	1	CID		85.6773	3.48152	0	1	3	2460.24	1.39893	3361	3361	53.8957	MS2	27/84
	NLQAQDYDASQIQVLEGLEAVR	5	1	CID		47.2716	3.00742	0	1	2	2460.24	1.96169	3306	3306	53.4156	MS2	19/42
gi307126481	8.43	3	617	6.40821	prolyl-tRNA synthetase [Streptococcus pneumoniae 670-6B]
	Sequence	# Proteins	# Protein Groups	Activation Type	Modifications	Probability	XCorr	Δ Score	Rank	Charge	MH+ [Da]	ΔM [ppm]	First Scan	Last Scan	RT [min]	MSOrder	Ions Matched	Annotation
	ATGDTIEVHADNVLETLEILSK	8	1	CID		34.1414	4.08255	0	1	3	2368.23	1.90914	4665	4665	65.5336	MS2	22/84
	SIDEVAAFLNVPEEQTIK	8	1	CID		53.6688	2.32567	0	1	2	2003.04	1.82048	3384	3384	54.1059	MS2	15/34
	mKQSKMPIPTLR	7	1	CID	M1(Oxidation)	3.8737	0.437934	0	1	2	1445.81	10.024	2418	2418	44.6205	MS2	3/22
gi298502350	9.84	6	925	6.33783	translation initiation factor IF-2 [Streptococcus pneumoniae TCH8431/19A]
	Sequence	# Proteins	# Protein Groups	Activation Type	Modifications	Probability	XCorr	Δ Score	Rank	Charge	MH+ [Da]	ΔM [ppm]	First Scan	Last Scan	RT [min]	MSOrder	Ions Matched	Annotation
	FHELPTEFEYTDGmTVAEIAK	9	1	CID	M14(Oxidation)	86.6893	4.08546	0	1	3	2444.13	1.70727	2475	2475	45.2539	MS2	31/80
	VAGPSTPVSITGLNEAPmAGDHFAVYEDEK	9	1	CID	M18(Oxidation)	58.631	2.25237	0	1	3	3118.47	1.31889	2473	2473	45.2324	MS2	18/116
	LAEQAQQVQAVVEVVPEKK	9	1	CID		19.7243	1.64324	0	1	3	2093.16	0.599454	1588	1588	34.2843	MS2	14/72
	nSNWNNNKK	9	1	CID	N1(Deamidated)	3.07151	0.942118	0	1	1	1119.51	-6.07854	3187	3187	52.3421	MS2	8/16
	NRSSQNQVRNQK	9	1	CID		5.76775	0.926755	0.0203451	2	2	1458.74	-8.6055	2644	2644	47.102	MS2	6/22
	NSnWNNNKK	9	1	CID	N3(Deamidated)	3.07151	0.899422	0.04532	2	1	1119.51	-6.07854	3187	3187	52.3421	MS2	8/16
gi194398579	10.71	2	495	5.95478	PTS system transporter subunit IIBCA [Streptococcus pneumoniae G54]
	Sequence	# Proteins	# Protein Groups	Activation Type	Modifications	Probability	XCorr	Δ Score	Rank	Charge	MH+ [Da]	ΔM [ppm]	First Scan	Last Scan	RT [min]	MSOrder	Ions Matched	Annotation
	SDIQDILDSGEIIPETLPSQmTEAQQNTVHFK	8	1	CID	M21(Oxidation)	51.7647	3.00927	0	1	3	3600.75	9.12092	3726	3726	57.1351	MS2	28/124
	DLTEEVYSVADGQVVALEQVK	6	1	CID		43.9162	2.94551	0	1	2	2292.17	6.38849	4197	4197	61.345	MS2	20/40
gi307126445	31.36	3	118	5.92206	50S ribosomal protein L18 [Streptococcus pneumoniae 670-6B]
	Sequence	# Proteins	# Protein Groups	Activation Type	Modifications	Probability	XCorr	Δ Score	Rank	Charge	MH+ [Da]	ΔM [ppm]	First Scan	Last Scan	RT [min]	MSOrder	Ions Matched	Annotation
	SNTGIYAQVIDDVAGVTLASASTLDK	2	1	CID		109.863	3.44881	0	1	2	2609.33	-0.211436	5421	5421	72.8749	MS2	26/50
	SNTGIYAQVIDDVAGVTLASASTLDK	2	1	CID		50.7416	2.47326	0	1	3	2609.34	4.71897	5406	5406	72.7644	MS2	25/100
	MISKPDKNKLR	1	1	CID		7.64267	0.590312	0.107042	3	2	1329.76	-8.84292	2033	2033	40.2051	MS2	3/20
gi15901040	7.61	7	802	5.85839	hypothetical protein SP_1175 [Streptococcus pneumoniae TIGR4]
	Sequence	# Proteins	# Protein Groups	Activation Type	Modifications	Probability	XCorr	Δ Score	Rank	Charge	MH+ [Da]	ΔM [ppm]	First Scan	Last Scan	RT [min]	MSOrder	Ions Matched	Annotation
	NELSASELAAAEAFLSGR	14	4	CID		92.3634	3.54121	0	1	2	1835.91	-0.836045	4265	4265	61.9474	MS2	20/34
	NELSASELAAAEAFLSGR	14	4	CID		51.9285	2.31718	0	1	2	1835.91	-2.30089	4623	4623	65.1469	MS2	14/34
	AYnLLTEAHKALFEnKGRNSDFqALDK	7	1	CID	N3(Deamidated) N15(Deamidated) Q23(Deamidated)	2.72226	1.62302	0.0943001	6	3	3096.53	5.04452	3703	3703	56.9453	MS2	16/104
	AYNLLTEAHKALFEnKGRnSDFqALDK	7	1	CID	N15(Deamidated) N19(Deamidated) Q23(Deamidated)	2.72226	1.43969	0.196603	9	3	3096.53	5.04452	3703	3703	56.9453	MS2	15/104
	ALFEnKGRNSDFqALDKLLER	7	1	CID	N5(Deamidated) Q13(Deamidated)	2.59114	1.38705	0.202007	3	4	2466.26	0.384789	3966	3966	59.2536	MS2	13/120
	ALFEnKGRnSDFQALDKLLER	7	1	CID	N5(Deamidated) N9(Deamidated)	2.59114	1.2018	0.308585	4	4	2466.26	0.384789	3966	3966	59.2536	MS2	13/120
	EKVAAQAYTKEK	7	1	CID		20.1016	0.414314	0	1	2	1365.75	12.9804	3372	3372	53.9825	MS2	7/22
gi225854841	9.21	2	228	5.85695	ABC transporter substrate-binding protein - glutamine-binding protein [Streptococcus pneumoniae JJA]
	Sequence	# Proteins	# Protein Groups	Activation Type	Modifications	Probability	XCorr	Δ Score	Rank	Charge	MH+ [Da]	ΔM [ppm]	First Scan	Last Scan	RT [min]	MSOrder	Ions Matched	Annotation
	NQVVGADIDmAQAIADELGVK	12	1	CID	M10(Oxidation)	16.9121	3.50862	0	1	2	2173.08	1.17841	3347	3347	53.7887	MS2	17/40
	NQVVGADIDmAQAIADELGVK	12	1	CID	M10(Oxidation)	5.82631	2.34832	0	1	3	2173.08	2.38566	3316	3316	53.501	MS2	22/80
gi169834089	28.37	3	141	5.72781	50S ribosomal protein L11 [Streptococcus pneumoniae Hungary19A-6]
	Sequence	# Proteins	# Protein Groups	Activation Type	Modifications	Probability	XCorr	Δ Score	Rank	Charge	MH+ [Da]	ΔM [ppm]	First Scan	Last Scan	RT [min]	MSOrder	Ions Matched	Annotation
	TADQAGmIIPVVISVYEDK	3	1	CID	M7(Oxidation)	69.422	3.24878	0	1	2	2065.05	0.251533	3365	3365	53.9202	MS2	19/36
	TADQAGmIIPVVISVYEDK	3	1	CID	M7(Oxidation)	6.88178	2.47903	0	1	3	2065.05	-1.654	3328	3328	53.6076	MS2	18/72
	MPDLnAAnIESAMRmIEGTAR	1	1	CID	N5(Deamidated) N8(Deamidated) M15(Oxidation)	2.55918	0.91898	0.110544	2	3	2309.05	-7.70567	4894	4894	67.6758	MS2	13/80
gi307126552	15.26	5	701	5.70094	ATP-dependent protease ATP-binding subunit ClpL [Streptococcus pneumoniae 670-6B]
	Sequence	# Proteins	# Protein Groups	Activation Type	Modifications	Probability	XCorr	Δ Score	Rank	Charge	MH+ [Da]	ΔM [ppm]	First Scan	Last Scan	RT [min]	MSOrder	Ions Matched	Annotation
	EAGNIILFFDEIHQILGAGSTGGDSGSK	11	1	CID		48.0861	3.0765	0	1	3	2833.4	2.13971	5550	5550	74.0696	MS2	27/108
	ATGQLPGNAETDVQmPQQASGmK	8	1	CID	M15(Oxidation) M22(Oxidation)	35.4543	2.62444	0	1	3	2391.09	0.993184	226	226	9.09069	MS2	25/88
	NTVIIATSNAGFGYEANLTEDADKPELmDR	10	1	CID	M28(Oxidation)	78.0015	1.79927	0	1	3	3271.54	-5.52588	2716	2716	47.8057	MS2	21/116
	AIDLVDVTAAHLAAQHPVTDVHAVER	11	1	CID		24.6348	1.71686	0	1	3	2748.45	2.95363	2538	2538	45.9693	MS2	21/100
	AIDLVDVTAAHLAAQHPVTDVHAVER	11	1	CID		20.3768	1.22715	0	1	4	2748.45	2.81812	2513	2513	45.6625	MS2	30/150
gi307127784	10.32	2	252	5.58134	triose-phosphate isomerase [Streptococcus pneumoniae 670-6B]
	Sequence	# Proteins	# Protein Groups	Activation Type	Modifications	Probability	XCorr	Δ Score	Rank	Charge	MH+ [Da]	ΔM [ppm]	First Scan	Last Scan	RT [min]	MSOrder	Ions Matched	Annotation
	LPSSDLVEAGIAAPALDLTTVLAVAK	4	1	CID		27.8108	3.08982	0	1	2	2535.43	1.5938	5371	5371	72.4377	MS2	18/50
	LPSSDLVEAGIAAPALDLTTVLAVAK	4	1	CID		21.0249	2.49151	0	1	3	2535.43	1.58035	5346	5346	72.2295	MS2	28/100
gi225858223	2.83	3	1767	5.39368	endo-alpha-N-acetylgalactosaminidase [Streptococcus pneumoniae 70585]
	Sequence	# Proteins	# Protein Groups	Activation Type	Modifications	Probability	XCorr	Δ Score	Rank	Charge	MH+ [Da]	ΔM [ppm]	First Scan	Last Scan	RT [min]	MSOrder	Ions Matched	Annotation
	YQSAAELIFTRPQVAETPLDLSGYEAALAK	8	1	CID		21.1494	3.07751	0	1	3	3252.68	0.473106	4419	4419	63.3072	MS2	26/116
	GYNDFmmDNLQIEEITLTGK	11	1	CID	M6(Oxidation) M7(Oxidation)	41.174	2.31617	0	1	2	2364.08	5.892	2947	2947	50.0103	MS2	19/38
	GYNDFmmDNLQIEEITLTGK	11	1	CID	M6(Oxidation) M7(Oxidation)	9.3137	1.53538	0	1	3	2364.07	0.0802156	2945	2945	49.9905	MS2	15/76
gi225858288	8.81	3	488	5.35162	aspartyl/glutamyl-tRNA amidotransferase subunit A [Streptococcus pneumoniae 70585]
	Sequence	# Proteins	# Protein Groups	Activation Type	Modifications	Probability	XCorr	Δ Score	Rank	Charge	MH+ [Da]	ΔM [ppm]	First Scan	Last Scan	RT [min]	MSOrder	Ions Matched	Annotation
	AIDEAGIDAnNVLSGIPLAVK	1	1	CID	N10(Deamidated)	42.9291	3.3141	0	2	2	2081.11	-1.70986	3531	3531	55.4148	MS2	20/40
	AIDEAGIDANnVLSGIPLAVK	1	1	CID	N11(Deamidated)	42.9291	3.24733	0.0201478	3	2	2081.11	-1.70986	3531	3531	55.4148	MS2	20/40
	SREEALNSFVTIAEEQALVQAK	9	1	CID		6.30169	2.03752	0	1	3	2433.26	1.16748	3357	3357	53.8649	MS2	16/84
gi221230965	7.24	3	428	5.02232	adenylosuccinate synthetase [Streptococcus pneumoniae ATCC 700669]
	Sequence	# Proteins	# Protein Groups	Activation Type	Modifications	Probability	XCorr	Δ Score	Rank	Charge	MH+ [Da]	ΔM [ppm]	First Scan	Last Scan	RT [min]	MSOrder	Ions Matched	Annotation
	VGDGPFPTELFDEVGER	4	1	CID		79.0271	2.86577	0	1	2	1863.87	-1.60405	3352	3352	53.8224	MS2	18/32
	VGDGPFPTELFDEVGER	4	1	CID		11.3926	2.15656	0	1	2	1863.88	2.05806	3745	3745	57.3005	MS2	12/32
	LERNLAEKnRLFEK	4	1	CID	N9(Deamidated)	3.73796	0.48656	0	1	3	1760.97	5.77826	5064	5064	69.3954	MS2	13/52
gi307127122	13	5	523	5.00862	signal recognition particle protein [Streptococcus pneumoniae 670-6B]
	Sequence	# Proteins	# Protein Groups	Activation Type	Modifications	Probability	XCorr	Δ Score	Rank	Charge	MH+ [Da]	ΔM [ppm]	First Scan	Last Scan	RT [min]	MSOrder	Ions Matched	Annotation
	TLGQQIDVPVFALGTEVPAVEIVR	8	1	CID		22.646	2.95208	0	1	2	2551.42	2.66778	4689	4689	65.761	MS2	17/46
	TLGQQIDVPVFALGTEVPAVEIVR	8	1	CID		13.2573	2.05654	0	1	3	2551.41	-0.702597	4736	4736	66.1832	MS2	28/92
	IVDEELTAVLGSDTAEIIK	8	1	CID		3.26485	1.58896	0.2441	2	3	2016.08	2.07611	3582	3582	55.9036	MS2	16/72
	IVDEELTAVLGSDTAEIIK	8	1	CID		9.95943	1.51166	0	1	2	2016.08	4.34786	3635	3635	56.373	MS2	12/36
	TLAqPNEILLVVDAmIGQEAANVAR	1	1	CID	Q4(Deamidated) M15(Oxidation)	19.6028	1.10685	0.470687	6	3	2653.4	9.64312	5350	5350	72.2596	MS2	13/96
gi307126446	14.63	2	164	4.95981	30S ribosomal protein S5 [Streptococcus pneumoniae 670-6B]
	Sequence	# Proteins	# Protein Groups	Activation Type	Modifications	Probability	XCorr	Δ Score	Rank	Charge	MH+ [Da]	ΔM [ppm]	First Scan	Last Scan	RT [min]	MSOrder	Ions Matched	Annotation
	NLIEVPmVGTTIPHEVLSEFGGAK	1	1	CID	M7(Oxidation)	4.61364	2.78414	0	1	3	2554.32	0.623829	4392	4392	63.0625	MS2	20/92
	NLIEVPmVGTTIPHEVLSEFGGAK	1	1	CID	M7(Oxidation)	6.85983	2.17568	0	1	3	2554.32	-4.13691	4049	4049	60.022	MS2	18/92
gi307127056	6.19	2	388	4.93266	chorismate synthase [Streptococcus pneumoniae 670-6B]
	Sequence	# Proteins	# Protein Groups	Activation Type	Modifications	Probability	XCorr	Δ Score	Rank	Charge	MH+ [Da]	ΔM [ppm]	First Scan	Last Scan	RT [min]	MSOrder	Ions Matched	Annotation
	LTAIIEGIPAGLPLTAEDINEDLR	4	1	CID		43.2206	2.61374	0	1	3	2534.37	0.93627	4474	4474	63.8075	MS2	27/92
	LTAIIEGIPAGLPLTAEDINEDLR	4	1	CID		37.854	2.31892	0	1	2	2534.38	3.94044	4522	4522	64.2302	MS2	13/46
gi307127111	20	3	80	4.87452	50S ribosomal protein L31 [Streptococcus pneumoniae 670-6B]
	Sequence	# Proteins	# Protein Groups	Activation Type	Modifications	Probability	XCorr	Δ Score	Rank	Charge	MH+ [Da]	ΔM [ppm]	First Scan	Last Scan	RT [min]	MSOrder	Ions Matched	Annotation
	SNETVEFEGETYPLIR	2	1	CID		63.1948	3.06609	0	1	2	1883.9	0.0479784	2493	2493	45.4489	MS2	18/30
	SNETVEFEGETYPLIR	2	1	CID		12.3456	1.80843	0	1	2	1883.9	0.7804	2219	2219	42.4276	MS2	13/30
	SNETVEFEGETYPLIR	2	1	CID		11.342	1.05635	0	1	2	1883.9	-4.83483	2796	2796	48.5437	MS2	10/30
gi221231760	5.73	3	838	4.86374	pneumococcal histidine triad protein D (bvh-11-2) [Streptococcus pneumoniae ATCC 700669]
	Sequence	# Proteins	# Protein Groups	Activation Type	Modifications	Probability	XCorr	Δ Score	Rank	Charge	MH+ [Da]	ΔM [ppm]	First Scan	Last Scan	RT [min]	MSOrder	Ions Matched	Annotation
	QVDFEALDNLLER	21	5	CID		53.4336	2.46582	0	1	2	1561.79	1.78188	3805	3805	57.8389	MS2	16/24
	DNNTISAEVDSLLALLK	13	4	CID		19.8397	2.39792	0	1	2	1815.97	-0.63542	5589	5589	74.4249	MS2	15/32
	TYDLLARIHqDLLDnKGR	3	3	CID	Q10(Deamidated) N15(Deamidated)	9.66769	1.28867	0.314033	4	3	2143.13	15.4406	4969	4969	68.3705	MS2	11/68
gi225856661	9.85	5	843	4.86374	pneumococcal histidine triad protein B [Streptococcus pneumoniae P1031]
	Sequence	# Proteins	# Protein Groups	Activation Type	Modifications	Probability	XCorr	Δ Score	Rank	Charge	MH+ [Da]	ΔM [ppm]	First Scan	Last Scan	RT [min]	MSOrder	Ions Matched	Annotation
	QVDFEALDNLLER	21	5	CID		53.4336	2.46582	0	1	2	1561.79	1.78188	3805	3805	57.8389	MS2	16/24
	DNNTISAEVDSLLALLK	13	4	CID		19.8397	2.39792	0	1	2	1815.97	-0.63542	5589	5589	74.4249	MS2	15/32
	ESNRVAYIDGDqAGQKAEnLTPDEVSKR	4	1	CID	Q12(Deamidated) N19(Deamidated)	3.86031	1.89816	0.317364	2	4	3092.48	7.68448	2603	2603	46.6373	MS2	21/162
	YYVEHPNERPHSDNGFGNASDHVQR	17	4	CID		31.5674	1.82903	0.0396246	3	4	2925.3	-0.0110237	206	206	8.80818	MS2	25/144
	ESnRVAYIDGDQAGQKAEnLTPDEVSKR	4	1	CID	N3(Deamidated) N19(Deamidated)	3.86031	1.47991	0.467777	8	4	3092.48	7.68448	2603	2603	46.6373	MS2	20/162
gi307127722	19.38	1	160	4.84911	transcription elongation factor GreA [Streptococcus pneumoniae 670-6B]
	Sequence	# Proteins	# Protein Groups	Activation Type	Modifications	Probability	XCorr	Δ Score	Rank	Charge	MH+ [Da]	ΔM [ppm]	First Scan	Last Scan	RT [min]	MSOrder	Ions Matched	Annotation
	SYGDLSENSEYEAAKDEQAFVEGQISSLETK	4	1	CID		95.3662	4.84911	0	1	3	3424.55	-1.38517	3935	3935	58.9627	MS2	35/120
gi307126900	20.11	4	378	4.81959	L-lactate oxidase [Streptococcus pneumoniae 670-6B]
	Sequence	# Proteins	# Protein Groups	Activation Type	Modifications	Probability	XCorr	Δ Score	Rank	Charge	MH+ [Da]	ΔM [ppm]	First Scan	Last Scan	RT [min]	MSOrder	Ions Matched	Annotation
	QIDGGPAAFDSLQEVAEAVDR	4	1	CID		129.533	4.81959	0	1	2	2188.05	2.45552	3837	3837	58.1106	MS2	23/40
	TSNAEGHVDFINTYDLEPmAQQVIPK	5	1	CID	M19(Oxidation)	2.74089	1.70328	0	1	3	2933.41	8.2082	2664	2664	47.2989	MS2	16/100
	HnPYnPTFPVDPRDLK	4	1	CID	N2(Deamidated) N5(Deamidated)	8.25069	0.889309	0	1	2	1911.94	15.0229	3680	3680	56.7723	MS2	8/30
	DDGINRHIMDRVK	4	1	CID		2.17059	0.517487	0	1	2	1568.8	0.163018	2575	2575	46.3531	MS2	5/24
gi307127076	16.87	2	166	4.69154	50S ribosomal protein L10 [Streptococcus pneumoniae 670-6B]
	Sequence	# Proteins	# Protein Groups	Activation Type	Modifications	Probability	XCorr	Δ Score	Rank	Charge	MH+ [Da]	ΔM [ppm]	First Scan	Last Scan	RT [min]	MSOrder	Ions Matched	Annotation
	AGLEDLASVFVGPSAVAFSNEDVIAPAK	4	1	CID		21.6511	2.40932	0	1	2	2774.42	-1.96214	5254	5254	71.2312	MS2	12/54
	AGLEDLASVFVGPSAVAFSNEDVIAPAK	4	1	CID		32.5505	2.28222	0	1	3	2774.42	-1.85351	5178	5178	70.5039	MS2	25/108
gi225858492	4.43	5	1895	4.59958	zinc metalloprotease ZmpB [Streptococcus pneumoniae 70585]
	Sequence	# Proteins	# Protein Groups	Activation Type	Modifications	Probability	XCorr	Δ Score	Rank	Charge	MH+ [Da]	ΔM [ppm]	First Scan	Last Scan	RT [min]	MSOrder	Ions Matched	Annotation
	TIGGVETDQVLSTSTEVTK	1	1	CID		53.2838	1.80354	0	1	2	1965	1.61255	1612	1612	34.6335	MS2	12/36
	GNDFITDLTDADHImVHYADK	2	1	CID	M15(Oxidation)	25.161	1.49802	0	1	3	2407.08	-2.65949	2883	2883	49.4351	MS2	15/80
	GTQEEDYVGEALVPEQLPEYK	2	1	CID		12.356	1.47272	0	1	2	2394.13	-0.984639	2540	2540	45.9907	MS2	14/40
	KQWYGEVLTK	2	1	CID		2.51101	0.564431	0	1	2	1251.68	11.2545	1986	1986	39.6428	MS2	4/18
	GWnLAGIASEIYR	2	1	CID	N3(Deamidated)	5.90835	0.513862	0.173401	2	3	1450.72	-10.2126	2690	2690	47.5478	MS2	9/48
gi307127431	16.16	3	359	4.57794	peptide chain release factor 1 [Streptococcus pneumoniae 670-6B]
	Sequence	# Proteins	# Protein Groups	Activation Type	Modifications	Probability	XCorr	Δ Score	Rank	Charge	MH+ [Da]	ΔM [ppm]	First Scan	Last Scan	RT [min]	MSOrder	Ions Matched	Annotation
	YEELGELLSDPDVVSDTK	4	1	CID		68.1908	2.33801	0	1	2	2008.96	0.563447	2745	2745	48.0909	MS2	14/34
	VHTSTATVLVmPEVEEVEYDIDPK	3	1	CID	M11(Oxidation)	9.4088	2.23994	0	1	3	2717.33	4.15111	3097	3097	51.4411	MS2	18/92
	IVHLPTNIKVEMqEER	5	1	CID	Q13(Deamidated)	4.07939	0.717399	0	1	3	1937.01	-9.90756	5695	5695	75.4465	MS2	7/60
gi307127712	8.97	2	468	4.56438	ATP synthase F1 subunit beta [Streptococcus pneumoniae 670-6B]
	Sequence	# Proteins	# Protein Groups	Activation Type	Modifications	Probability	XCorr	Δ Score	Rank	Charge	MH+ [Da]	ΔM [ppm]	First Scan	Last Scan	RT [min]	MSOrder	Ions Matched	Annotation
	YHELQDIIAILGmDELSDEEK	4	1	CID	M13(Oxidation)	18.2975	2.33328	0	1	3	2477.17	-1.70816	4398	4398	63.1085	MS2	20/80
	VFNVLGDTIDLEAPFTEDAER	4	1	CID		50.0816	2.2311	0	1	2	2351.15	6.01653	4350	4350	62.6937	MS2	14/40
gi307067684	2.88	4	1875	4.56381	hypothetical protein SPAP_1059 [Streptococcus pneumoniae AP200]
	Sequence	# Proteins	# Protein Groups	Activation Type	Modifications	Probability	XCorr	Δ Score	Rank	Charge	MH+ [Da]	ΔM [ppm]	First Scan	Last Scan	RT [min]	MSOrder	Ions Matched	Annotation
	IDFQEEIQENPDLAEGTVR	9	3	CID		63.691	2.54433	0	1	2	2203.05	-3.54214	2221	2221	42.4501	MS2	18/36
	IDFQEEIQENPDLAEGTVR	9	3	CID		41.6205	2.01948	0	1	3	2203.05	1.38826	2302	2302	43.4035	MS2	23/72
	AnnKTITSYGKTK	1	1	CID	N2(Deamidated) N3(Deamidated)	17.2216	0.967042	0	1	2	1427.75	11.2557	1911	1911	38.7258	MS2	8/24
	NLLGISDnVKLTELYLDEQFTK	1	1	CID	N8(Deamidated)	8.37749	0.903592	0.584685	4	3	2554.32	-10.6279	4049	4049	60.022	MS2	9/84
gi225858148	6.42	3	296	4.40052	hypothetical protein SP70585_0358 [Streptococcus pneumoniae 70585]
	Sequence	# Proteins	# Protein Groups	Activation Type	Modifications	Probability	XCorr	Δ Score	Rank	Charge	MH+ [Da]	ΔM [ppm]	First Scan	Last Scan	RT [min]	MSOrder	Ions Matched	Annotation
	qYPILHHNKNYQnFKMIqK	1	1	CID	Q1(Deamidated) N13(Deamidated) Q18(Deamidated)	3.27319	2.09511	0.0815614	2	3	2447.24	17.8185	5226	5226	70.9535	MS2	19/72
	qYPILHHNKNYqNFKMIqK	1	1	CID	Q1(Deamidated) Q12(Deamidated) Q18(Deamidated)	3.27319	1.9818	0.131234	6	3	2447.24	17.8185	5226	5226	70.9535	MS2	19/72
	qYPILHHNKnYQNFKMIqK	1	1	CID	Q1(Deamidated) N10(Deamidated) Q18(Deamidated)	3.27319	1.74532	0.234902	9	3	2447.24	17.8185	5226	5226	70.9535	MS2	18/72
gi307128123	5.73	3	471	4.35879	pneumolysin [Streptococcus pneumoniae 670-6B]
	Sequence	# Proteins	# Protein Groups	Activation Type	Modifications	Probability	XCorr	Δ Score	Rank	Charge	MH+ [Da]	ΔM [ppm]	First Scan	Last Scan	RT [min]	MSOrder	Ions Matched	Annotation
	SDEVEAAFEALIK	2	1	CID		57.4945	2.30565	0	1	2	1421.72	2.37802	4036	4036	59.9088	MS2	17/24
	SDEVEAAFEALIK	2	1	CID		42.6037	2.05314	0	1	2	1421.72	1.40146	3698	3698	56.9048	MS2	17/24
	EGNQLPDEFVVIER	2	1	CID		7.82946	1.25279	0	1	2	1644.82	-1.64671	2264	2264	42.9606	MS2	8/26
gi307126450	9.91	1	212	4.20961	adenylate kinase [Streptococcus pneumoniae 670-6B]
	Sequence	# Proteins	# Protein Groups	Activation Type	Modifications	Probability	XCorr	Δ Score	Rank	Charge	MH+ [Da]	ΔM [ppm]	First Scan	Last Scan	RT [min]	MSOrder	Ions Matched	Annotation
	GLVHDIEGNQDINDVFSDIEK	4	1	CID		54.7935	4.20961	0	1	3	2357.13	0.52252	3254	3254	52.9372	MS2	34/80
gi307126400	4.62	1	649	4.05329	DNA mismatch repair protein MutL [Streptococcus pneumoniae 670-6B]
	Sequence	# Proteins	# Protein Groups	Activation Type	Modifications	Probability	XCorr	Δ Score	Rank	Charge	MH+ [Da]	ΔM [ppm]	First Scan	Last Scan	RT [min]	MSOrder	Ions Matched	Annotation
	TEPSRPSQTEVADYQVELTDEGQDLTLFAK	6	1	CID		61.6033	4.05329	0	1	3	3367.61	-4.609	3434	3434	54.5455	MS2	25/116
gi307127871	6.11	1	262	3.9918	cell-division initiation protein [Streptococcus pneumoniae 670-6B]
	Sequence	# Proteins	# Protein Groups	Activation Type	Modifications	Probability	XCorr	Δ Score	Rank	Charge	MH+ [Da]	ΔM [ppm]	First Scan	Last Scan	RT [min]	MSOrder	Ions Matched	Annotation
	GFDPEEVDEFLDIVVR	5	1	CID		112.681	3.9918	0	1	2	1878.91	1.04224	5334	5334	72.1188	MS2	21/30
gi169834496	11.11	4	612	3.97742	AmiA protein [Streptococcus pneumoniae Hungary19A-6]
	Sequence	# Proteins	# Protein Groups	Activation Type	Modifications	Probability	XCorr	Δ Score	Rank	Charge	MH+ [Da]	ΔM [ppm]	First Scan	Last Scan	RT [min]	MSOrder	Ions Matched	Annotation
	ENVHLDTINLAYYDGSDQESLER	9	1	CID		53.1255	3.97742	0	1	3	2681.23	0.313009	2439	2439	44.8758	MS2	25/88
	ALEADGVQFPIHLDVPVDQASK	9	1	CID		31.1597	1.61591	0	1	3	2349.21	0.0920516	3405	3405	54.2896	MS2	15/84
	GVNLADGQDGLFNADK	9	1	CID		7.80793	0.886327	0	1	2	1633.78	1.03114	1677	1677	35.6294	MS2	10/30
	AREKWLK	16	2	CID		4.10993	0.717364	0	1	2	930.548	-3.868	1427	1427	31.9504	MS2	4/12
gi307126986	7.88	1	520	3.97065	GMP synthase [Streptococcus pneumoniae 670-6B]
	Sequence	# Proteins	# Protein Groups	Activation Type	Modifications	Probability	XCorr	Δ Score	Rank	Charge	MH+ [Da]	ΔM [ppm]	First Scan	Last Scan	RT [min]	MSOrder	Ions Matched	Annotation
	EYGQSTLTHTPSALFESTPDEQTVLmSHGDAVTEIPADFVR	4	1	CID	M26(Oxidation)	30.017	3.97065	0	1	4	4493.11	2.84288	3778	3778	57.5871	MS2	39/240
gi307127171	10.57	1	246	3.92364	glutamine transport ATP-binding protein GlnQ [Streptococcus pneumoniae 670-6B]
	Sequence	# Proteins	# Protein Groups	Activation Type	Modifications	Probability	XCorr	Δ Score	Rank	Charge	MH+ [Da]	ΔM [ppm]	First Scan	Last Scan	RT [min]	MSOrder	Ions Matched	Annotation
	VIFTADGEFLEDGTPDQIFDNPQHPR	3	1	CID		68.7287	3.92364	0	1	3	2958.39	0.688204	3386	3386	54.1243	MS2	28/100
gi307128193	6.44	1	404	3.7141	aspartate aminotransferase [Streptococcus pneumoniae 670-6B]
	Sequence	# Proteins	# Protein Groups	Activation Type	Modifications	Probability	XCorr	Δ Score	Rank	Charge	MH+ [Da]	ΔM [ppm]	First Scan	Last Scan	RT [min]	MSOrder	Ions Matched	Annotation
	LNTGNPAEFGFTAPDEVIHDLImNAR	7	1	CID	M23(Oxidation)	42.176	3.7141	0	1	3	2858.38	0.230645	5126	5126	69.9934	MS2	22/100
gi307127756	16.48	1	182	3.71313	NADPH-dependent fmn reductase family protein [Streptococcus pneumoniae 670-6B]
	Sequence	# Proteins	# Protein Groups	Activation Type	Modifications	Probability	XCorr	Δ Score	Rank	Charge	MH+ [Da]	ΔM [ppm]	First Scan	Last Scan	RT [min]	MSOrder	Ions Matched	Annotation
	AEVSYLDYSALPLFSQDLEVPTHPAVAAAR	6	1	CID		97.1023	3.71313	0	1	3	3230.64	0.106778	4598	4598	64.9365	MS2	27/116
gi307127374	32.28	6	316	3.67567	ribose-Phosphate pyrophosphokinase [Streptococcus pneumoniae 670-6B]
	Sequence	# Proteins	# Protein Groups	Activation Type	Modifications	Probability	XCorr	Δ Score	Rank	Charge	MH+ [Da]	ΔM [ppm]	First Scan	Last Scan	RT [min]	MSOrder	Ions Matched	Annotation
	SLAEYLDAPIAIIDYPQDDATR	3	1	CID		75.9473	3.67567	0	1	2	2450.22	10.8687	4367	4367	62.8471	MS2	20/42
	EGATEIYAVSSHGLFVEGAAELLDNTNIK	3	1	CID		4.21691	1.49419	0.0380478	2	3	3048.51	-2.77045	4770	4770	66.5067	MS2	20/112
	NEGYIIGDVEGKK	3	1	CID		7.12436	1.21688	0.472217	2	2	1421.72	-8.84198	4036	4036	59.9088	MS2	10/24
	EKTPKNVCYITASELIGDAIVR	3	1	CID		2.26775	0.721081	0.690361	2	2	2420.3	13.6386	5062	5062	69.3833	MS2	6/42
	qFSDGEIqVNIEESVR	3	1	CID	Q1(Deamidated) Q8(Deamidated)	3.37597	0.51638	0	1	2	1851.87	6.34973	3127	3127	51.7147	MS2	6/30
	QFSDGEIqVnIEESVR	3	1	CID	Q8(Deamidated) N10(Deamidated)	3.37597	0.430515	0.166283	2	2	1851.87	6.34973	3127	3127	51.7147	MS2	4/30
gi307127554	3.43	1	757	3.55321	X-Pro dipeptidyl-peptidase [Streptococcus pneumoniae 670-6B]
	Sequence	# Proteins	# Protein Groups	Activation Type	Modifications	Probability	XCorr	Δ Score	Rank	Charge	MH+ [Da]	ΔM [ppm]	First Scan	Last Scan	RT [min]	MSOrder	Ions Matched	Annotation
	GNTLIDQLVSDGLIPEDNDYHYFNGK	7	1	CID		69.3241	3.55321	0	1	3	2937.39	-0.40664	4662	4662	65.5015	MS2	24/100
gi307127490	26.49	2	185	3.48161	translation initiation factor IF-3 [Streptococcus pneumoniae 670-6B]
	Sequence	# Proteins	# Protein Groups	Activation Type	Modifications	Probability	XCorr	Δ Score	Rank	Charge	MH+ [Da]	ΔM [ppm]	First Scan	Last Scan	RT [min]	MSOrder	Ions Matched	Annotation
	LIGLEGEQLGIKPLSEAQALADNANVDLVLIQPQAKPPVAK	4	1	CID		36.6699	3.48161	0	1	4	4261.38	2.12398	5008	5008	68.8125	MS2	45/240
	MFFSNKTK	2	1	CID		4.972	0.787424	0	1	1	1002.51	1.57709	4513	4513	64.1619	MS2	5/14
gi298503731	5.76	5	1216	3.4233	DNA-directed RNA polymerase [Streptococcus pneumoniae TCH8431/19A]
	Sequence	# Proteins	# Protein Groups	Activation Type	Modifications	Probability	XCorr	Δ Score	Rank	Charge	MH+ [Da]	ΔM [ppm]	First Scan	Last Scan	RT [min]	MSOrder	Ions Matched	Annotation
	ILFNDImPEGLPYLQEPNNANLTEGVPAK	6	1	CID	M7(Oxidation)	17.8991	3.4233	0	1	3	3213.61	1.04498	3867	3867	58.3735	MS2	22/112
	RmLQEAVDALIDNGRR	6	1	CID	M2(Oxidation)	2.97424	0.68566	0.617847	2	2	1872.96	-9.9812	3714	3714	57.0359	MS2	7/30
	nPIVmmMDSGARGNISNFSQLAGMR	6	1	CID	N1(Deamidated) M5(Oxidation) M6(Oxidation)	2.6017	0.490228	0.800182	8	2	2730.25	0.0664706	4125	4125	60.7038	MS2	5/48
	nPIVmMmDSGARGNISNFSQLAGMR	6	1	CID	N1(Deamidated) M5(Oxidation) M7(Oxidation)	2.6017	0.453819	0.815023	9	2	2730.25	0.0664706	4125	4125	60.7038	MS2	5/48
	nPIVMmmDSGARGNISNFSQLAGMR	6	1	CID	N1(Deamidated) M6(Oxidation) M7(Oxidation)	2.6017	0.453	0.815357	10	2	2730.25	0.0664706	4125	4125	60.7038	MS2	5/48
gi221232374	9.89	8	647	3.41195	threonyl-tRNA synthetase [Streptococcus pneumoniae ATCC 700669]
	Sequence	# Proteins	# Protein Groups	Activation Type	Modifications	Probability	XCorr	Δ Score	Rank	Charge	MH+ [Da]	ΔM [ppm]	First Scan	Last Scan	RT [min]	MSOrder	Ions Matched	Annotation
	EFESGVTTFEIAQSISNSLAK	9	1	CID		60.4986	3.41195	0	1	2	2258.11	-6.67315	4208	4208	61.4396	MS2	18/40
	AITEDGSIEIVTPDHEDALPILR	9	1	CID		51.1859	1.68247	0	1	3	2504.29	-0.308456	3006	3006	50.6113	MS2	18/88
	GnSDNAMmQRIYGTAWFEKK	2	1	CID	N2(Deamidated) M8(Oxidation)	3.08041	1.24543	0.188848	2	3	2364.07	-1.26078	2945	2945	49.9905	MS2	18/76
	GnSDNAmMQRIYGTAWFEKK	2	1	CID	N2(Deamidated) M7(Oxidation)	3.08041	1.13667	0.259684	3	3	2364.07	-1.26078	2945	2945	49.9905	MS2	18/76
	GNSDNAmMqRIYGTAWFEKK	2	1	CID	M7(Oxidation) Q9(Deamidated)	3.08041	1.11633	0.272928	4	3	2364.07	-1.26078	2945	2945	49.9905	MS2	18/76
	GNSDnAMmQRIYGTAWFEKK	2	1	CID	N5(Deamidated) M8(Oxidation)	3.08041	1.11399	0.274454	5	3	2364.07	-1.26078	2945	2945	49.9905	MS2	18/76
	GNSDNAMmqRIYGTAWFEKK	2	1	CID	M8(Oxidation) Q9(Deamidated)	3.08041	1.10609	0.279599	6	3	2364.07	-1.26078	2945	2945	49.9905	MS2	18/76
	GNSDnAmMQRIYGTAWFEKK	2	1	CID	N5(Deamidated) M7(Oxidation)	3.08041	1.01366	0.339799	7	3	2364.07	-1.26078	2945	2945	49.9905	MS2	18/76
gi307127641	4	1	575	3.32138	septation ring formation regulator EzrA [Streptococcus pneumoniae 670-6B]
	Sequence	# Proteins	# Protein Groups	Activation Type	Modifications	Probability	XCorr	Δ Score	Rank	Charge	MH+ [Da]	ΔM [ppm]	First Scan	Last Scan	RT [min]	MSOrder	Ions Matched	Annotation
	ASHQIDQIESQITLIEEDIAAIR	4	1	CID		60.2811	3.32138	0	1	3	2593.35	0.544962	5444	5444	73.0921	MS2	27/88
gi307127877	5.91	1	457	3.29879	cell division protein FtsA [Streptococcus pneumoniae 670-6B]
	Sequence	# Proteins	# Protein Groups	Activation Type	Modifications	Probability	XCorr	Δ Score	Rank	Charge	MH+ [Da]	ΔM [ppm]	First Scan	Last Scan	RT [min]	MSOrder	Ions Matched	Annotation
	SVNVGLPGNLLQVEPTQGmIPVTSDTK	2	1	CID	M19(Oxidation)	18.55	3.29879	0	1	3	2810.46	3.63022	3046	3046	51	MS2	25/104
gi225858133	10.64	1	329	3.29611	mannose-specific phosphotransferase system component iiab [Streptococcus pneumoniae 70585]
	Sequence	# Proteins	# Protein Groups	Activation Type	Modifications	Probability	XCorr	Δ Score	Rank	Charge	MH+ [Da]	ΔM [ppm]	First Scan	Last Scan	RT [min]	MSOrder	Ions Matched	Annotation
	ALPEELNPVEEVASAAAAPVAQTAIPEGTVIGDGK	3	1	CID		73.6632	3.29611	0	1	3	3414.77	1.64889	4337	4337	62.5764	MS2	32/136
gi307127816	10.32	1	339	3.28886	UDP-glucose 4-epimerase [Streptococcus pneumoniae 670-6B]
	Sequence	# Proteins	# Protein Groups	Activation Type	Modifications	Probability	XCorr	Δ Score	Rank	Charge	MH+ [Da]	ΔM [ppm]	First Scan	Last Scan	RT [min]	MSOrder	Ions Matched	Annotation
	YFNPIGAHESGDLGENPNGIPNNLLPYVTQVAVGK	7	1	CID		64.9821	3.28886	0	1	3	3694.86	5.04643	4245	4245	61.7744	MS2	36/136
gi225858205	7.39	2	230	3.23297	capsular polysaccharide biosynthesis protein Wzd [Streptococcus pneumoniae 70585]
	Sequence	# Proteins	# Protein Groups	Activation Type	Modifications	Probability	XCorr	Δ Score	Rank	Charge	MH+ [Da]	ΔM [ppm]	First Scan	Last Scan	RT [min]	MSOrder	Ions Matched	Annotation
	EIILSQDVLEEVVSDLK	5	1	CID		78.4938	3.23297	0	1	2	1929.04	-1.2098	5184	5184	70.5543	MS2	19/32
	EIILSQDVLEEVVSDLK	5	1	CID		19.8998	1.79851	0	1	3	1929.04	1.70645	5249	5249	71.1798	MS2	18/64
gi307126430	14.01	1	207	3.23187	50S ribosomal protein L4/L1 family [Streptococcus pneumoniae 670-6B]
	Sequence	# Proteins	# Protein Groups	Activation Type	Modifications	Probability	XCorr	Δ Score	Rank	Charge	MH+ [Da]	ΔM [ppm]	First Scan	Last Scan	RT [min]	MSOrder	Ions Matched	Annotation
	EAGQVVLSDAVFGIEPNESVVFDVIISQR	1	1	CID		50.406	3.23187	0	1	3	3117.61	3.67756	5622	5622	74.7198	MS2	30/112
gi307128472	11.54	2	182	3.22444	ribosome-associated factor Y [Streptococcus pneumoniae 670-6B]
	Sequence	# Proteins	# Protein Groups	Activation Type	Modifications	Probability	XCorr	Δ Score	Rank	Charge	MH+ [Da]	ΔM [ppm]	First Scan	Last Scan	RT [min]	MSOrder	Ions Matched	Annotation
	VATGQLFTDALVEDSNVVQSK	2	1	CID		89.5367	3.22444	0	1	2	2221.14	0.774346	2955	2955	50.0894	MS2	21/40
	VATGQLFTDALVEDSNVVQSK	2	1	CID		33.2852	1.48269	0.201232	9	3	2221.14	2.28678	2909	2909	49.6942	MS2	23/80
gi225859303	2.72	2	1985	3.21383	G5 domain family [Streptococcus pneumoniae 70585]
	Sequence	# Proteins	# Protein Groups	Activation Type	Modifications	Probability	XCorr	Δ Score	Rank	Charge	MH+ [Da]	ΔM [ppm]	First Scan	Last Scan	RT [min]	MSOrder	Ions Matched	Annotation
	VGDTNNLTFYLDNDGNGVYTEGVDELVQK	5	2	CID		42.3488	3.21383	0	1	3	3189.48	-2.60975	3776	3776	57.5689	MS2	32/112
	GGNFVSHSGYSLEAAVETSTnqTIK	1	1	CID	N21(Deamidated) Q22(Deamidated)	3.26462	1.68801	0	1	3	2599.22	-0.496081	4610	4610	65.038	MS2	13/96
gi116515899	1.84	2	2551	3.21383	G5 domain-containing protein [Streptococcus pneumoniae D39]
	Sequence	# Proteins	# Protein Groups	Activation Type	Modifications	Probability	XCorr	Δ Score	Rank	Charge	MH+ [Da]	ΔM [ppm]	First Scan	Last Scan	RT [min]	MSOrder	Ions Matched	Annotation
	VGDTNNLTFYLDNDGNGVYTEGVDELVQK	5	2	CID		42.3488	3.21383	0	1	3	3189.48	-2.60975	3776	3776	57.5689	MS2	32/112
	TEEVTKPAEKVEEAKDKK	1	1	CID		2.40748	1.24312	0	1	3	2059.09	-6.06275	4516	4516	64.1851	MS2	11/68
gi307126956	7.52	2	678	3.14401	glycyl-tRNA synthetase subunit beta [Streptococcus pneumoniae 670-6B]
	Sequence	# Proteins	# Protein Groups	Activation Type	Modifications	Probability	XCorr	Δ Score	Rank	Charge	MH+ [Da]	ΔM [ppm]	First Scan	Last Scan	RT [min]	MSOrder	Ions Matched	Annotation
	NLLVELGLEELPAYVVTPSEK	10	1	CID		97.4785	3.14401	0	1	2	2313.26	0.657783	4966	4966	68.3457	MS2	21/40
	LNnVTFHEKIGSLREHMIRTGqITVLLAEK	10	1	CID	N3(Deamidated) Q22(Deamidated)	13.1793	0.859455	0.651594	3	5	3449.88	23.6175	4084	4084	60.334	MS2	26/232
gi225857977	11.94	2	268	3.14209	ABC transporter solute-binding protein - amino acid transport [Streptococcus pneumoniae 70585]
	Sequence	# Proteins	# Protein Groups	Activation Type	Modifications	Probability	XCorr	Δ Score	Rank	Charge	MH+ [Da]	ΔM [ppm]	First Scan	Last Scan	RT [min]	MSOrder	Ions Matched	Annotation
	GFVENNPDLAIADLNFEK	9	1	CID		43.3345	3.14209	0	1	2	2005.99	-0.275576	3057	3057	51.0977	MS2	18/34
	VFDFSIPYYTAKNK	3	1	CID		6.64858	0.684663	0	1	2	1692.85	-14.9171	3620	3620	56.2347	MS2	3/26
gi15900430	18.39	3	174	3.12508	heat shock protein GrpE [Streptococcus pneumoniae TIGR4]
	Sequence	# Proteins	# Protein Groups	Activation Type	Modifications	Probability	XCorr	Δ Score	Rank	Charge	MH+ [Da]	ΔM [ppm]	First Scan	Last Scan	RT [min]	MSOrder	Ions Matched	Annotation
	NEEVEEVQEEEVVKTAEETTPEKSELDLAnER	1	1	CID	N30(Deamidated)	63.1672	3.12508	0	1	3	3703.69	-29.7369	2829	2829	48.8728	MS2	28/124
	NEEVEEVqEEEVVKTAEETTPEKSELDLANER	1	1	CID	Q8(Deamidated)	44.3925	2.47767	0.207166	3	3	3703.69	-29.7369	2829	2829	48.8728	MS2	29/124
	nEEVEEVQEEEVVKTAEETTPEKSELDLANER	1	1	CID	N1(Deamidated)	20.4058	2.35642	0.245966	4	3	3703.69	-29.7369	2829	2829	48.8728	MS2	29/124
gi307127665	6.77	1	399	3.09695	membrane-fusion protein [Streptococcus pneumoniae 670-6B]
	Sequence	# Proteins	# Protein Groups	Activation Type	Modifications	Probability	XCorr	Δ Score	Rank	Charge	MH+ [Da]	ΔM [ppm]	First Scan	Last Scan	RT [min]	MSOrder	Ions Matched	Annotation
	AQSQLDATTVLSTLEGTVVEVNSNVSK	9	1	CID		44.2002	3.09695	0	1	3	2790.44	-1.80959	5155	5155	70.2476	MS2	21/104
gi307127742	18.65	2	311	3.09495	manganese-dependent inorganic pyrophosphatase [Streptococcus pneumoniae 670-6B]
	Sequence	# Proteins	# Protein Groups	Activation Type	Modifications	Probability	XCorr	Δ Score	Rank	Charge	MH+ [Da]	ΔM [ppm]	First Scan	Last Scan	RT [min]	MSOrder	Ions Matched	Annotation
	IIAPELAELAGVNLEEYGLAmLK	1	1	CID	M21(Oxidation)	114.079	3.09495	0	1	2	2473.33	0.975596	5323	5323	71.9735	MS2	19/44
	AEGAEQVILTDHNEFQQSVSDIAEVEVYGVVDHHR	1	1	CID		22.1471	1.54009	0.0821951	3	5	3920.86	-6.47039	4311	4311	62.3565	MS2	38/272
gi15900863	7.63	4	459	3.04993	bifunctional N-acetylglucosamine-1-phosphate uridyltransferase/glucosamine-1-phosphate acetyltransferase [Streptococcus pneumoniae TIGR4]
	Sequence	# Proteins	# Protein Groups	Activation Type	Modifications	Probability	XCorr	Δ Score	Rank	Charge	MH+ [Da]	ΔM [ppm]	First Scan	Last Scan	RT [min]	MSOrder	Ions Matched	Annotation
	TVIGnNVFVGSNSTIIAPVELGDNSLVGAGSTITK	1	1	CID	N5(Deamidated)	13.0317	3.04993	0	2	3	3445.8	-3.04153	4218	4218	61.5312	MS2	25/136
	TVIGNnVFVGSNSTIIAPVELGDNSLVGAGSTITK	1	1	CID	N6(Deamidated)	7.21435	2.94766	0.03353	3	3	3445.8	-3.04153	4218	4218	61.5312	MS2	24/136
	TVIGNNVFVGSnSTIIAPVELGDNSLVGAGSTITK	1	1	CID	N12(Deamidated)	7.21435	2.52053	0.173577	4	3	3445.8	-3.04153	4218	4218	61.5312	MS2	22/136
	TVIGNNVFVGSNSTIIAPVELGDnSLVGAGSTITK	1	1	CID	N24(Deamidated)	2.77891	1.98813	0.34814	5	3	3445.8	-3.04153	4218	4218	61.5312	MS2	22/136
gi307126710	12.82	1	195	3.01469	DNA-directed RNA polymerase subunit delta [Streptococcus pneumoniae 670-6B]
	Sequence	# Proteins	# Protein Groups	Activation Type	Modifications	Probability	XCorr	Δ Score	Rank	Charge	MH+ [Da]	ΔM [ppm]	First Scan	Last Scan	RT [min]	MSOrder	Ions Matched	Annotation
	DHEmHFSDLVNEIQNYLGTSNSDIR	3	1	CID	M4(Oxidation)	57.1383	3.01469	0	1	4	2950.33	3.16874	4277	4277	62.0539	MS2	37/144
gi307126636	7.06	1	411	2.98809	3-oxoacyl-[acyl-carrier-protein] synthase 2 [Streptococcus pneumoniae 670-6B]
	Sequence	# Proteins	# Protein Groups	Activation Type	Modifications	Probability	XCorr	Δ Score	Rank	Charge	MH+ [Da]	ΔM [ppm]	First Scan	Last Scan	RT [min]	MSOrder	Ions Matched	Annotation
	HNFVPmTAGTSEVSDYIEANVVYGQGLEK	3	1	CID	M6(Oxidation)	45.0175	2.98809	0	1	3	3171.49	-1.51947	3236	3236	52.7784	MS2	21/112
gi307128226	3.85	2	883	2.89853	aldehyde-alcohol dehydrogenase 2 [Streptococcus pneumoniae 670-6B]
	Sequence	# Proteins	# Protein Groups	Activation Type	Modifications	Probability	XCorr	Δ Score	Rank	Charge	MH+ [Da]	ΔM [ppm]	First Scan	Last Scan	RT [min]	MSOrder	Ions Matched	Annotation
	VVYQIFADVEPDPDITTVNR	9	1	CID		71.7453	2.89853	0	1	2	2291.16	4.45841	3072	3072	51.2181	MS2	15/38
	DSIqYLQKCRDVER	9	1	CID	Q4(Deamidated)	2.47831	0.635704	0.462857	2	2	1753.85	0.712486	1592	1592	34.321	MS2	5/26
gi307126455	14.06	2	128	2.83145	50S ribosomal protein L17 [Streptococcus pneumoniae 670-6B]
	Sequence	# Proteins	# Protein Groups	Activation Type	Modifications	Probability	XCorr	Δ Score	Rank	Charge	MH+ [Da]	ΔM [ppm]	First Scan	Last Scan	RT [min]	MSOrder	Ions Matched	Annotation
	DLTTDLLINESIVTTEAR	2	1	CID		57.0035	2.83145	0	1	2	2004.05	1.19755	3747	3747	57.3184	MS2	19/34
	DLTTDLLINESIVTTEAR	2	1	CID		38.2334	1.91872	0	1	3	2004.05	1.79445	3628	3628	56.3063	MS2	20/68
gi225858795	5.9	1	305	2.82586	zinc-binding lipoprotein AdcA [Streptococcus pneumoniae 70585]
	Sequence	# Proteins	# Protein Groups	Activation Type	Modifications	Probability	XCorr	Δ Score	Rank	Charge	MH+ [Da]	ΔM [ppm]	First Scan	Last Scan	RT [min]	MSOrder	Ions Matched	Annotation
	TYLENLEENmSVLAEELK	3	1	CID	M10(Oxidation)	50.673	2.82586	0	1	2	2141.03	0.0937206	3335	3335	53.6849	MS2	19/34
gi225859128	9.58	3	428	2.81295	homoserine dehydrogenase [Streptococcus pneumoniae 70585]
	Sequence	# Proteins	# Protein Groups	Activation Type	Modifications	Probability	XCorr	Δ Score	Rank	Charge	MH+ [Da]	ΔM [ppm]	First Scan	Last Scan	RT [min]	MSOrder	Ions Matched	Annotation
	NITPEDVAVAQELGYVVK	6	1	CID		37.6429	2.81295	0	1	2	1945.03	1.69524	3022	3022	50.75	MS2	17/34
	TFITRALEAGK	5	1	CID		2.40734	0.687262	0	1	2	1206.67	-11.9946	5014	5014	68.8666	MS2	8/20
	AQLENVLAELKK	1	1	CID		3.42986	0.681133	0	1	2	1355.78	-9.77269	3816	3816	57.9299	MS2	6/22
gi307127749	22.92	1	96	2.72583	30S ribosomal protein S6 [Streptococcus pneumoniae 670-6B]
	Sequence	# Proteins	# Protein Groups	Activation Type	Modifications	Probability	XCorr	Δ Score	Rank	Charge	MH+ [Da]	ΔM [ppm]	First Scan	Last Scan	RT [min]	MSOrder	Ions Matched	Annotation
	EGLYHIVNVEANDDAALKEFDR	1	1	CID		22.2626	2.72583	0	1	3	2518.22	-0.966445	2658	2658	47.2468	MS2	22/84
gi307127447	5.58	2	1039	2.71706	pneumococcal histidine triad protein E [Streptococcus pneumoniae 670-6B]
	Sequence	# Proteins	# Protein Groups	Activation Type	Modifications	Probability	XCorr	Δ Score	Rank	Charge	MH+ [Da]	ΔM [ppm]	First Scan	Last Scan	RT [min]	MSOrder	Ions Matched	Annotation
	LENVLFNmDGTIELYLPSGEVIK	10	1	CID	M8(Oxidation)	25.9665	2.71706	0	1	3	2610.35	8.41994	4462	4462	63.7009	MS2	21/88
	YTTNDGYVFNPADIIEDTGNAYIVPHGGHYHYIPK	10	1	CID		34.3175	1.68464	0.135443	3	5	3951.87	8.24487	3849	3849	58.2212	MS2	42/272
gi307126647	16.28	1	129	2.69867	general stress protein, Gls24 family [Streptococcus pneumoniae 670-6B]
	Sequence	# Proteins	# Protein Groups	Activation Type	Modifications	Probability	XCorr	Δ Score	Rank	Charge	MH+ [Da]	ΔM [ppm]	First Scan	Last Scan	RT [min]	MSOrder	Ions Matched	Annotation
	NmADVELAAINIHVAGIVPDK	2	1	CID	M2(Oxidation)	36.0766	2.69867	0	1	3	2206.17	12.7818	3015	3015	50.6953	MS2	20/80
gi307126178	7.01	1	371	2.69441	GTP-binding protein YchF [Streptococcus pneumoniae 670-6B]
	Sequence	# Proteins	# Protein Groups	Activation Type	Modifications	Probability	XCorr	Δ Score	Rank	Charge	MH+ [Da]	ΔM [ppm]	First Scan	Last Scan	RT [min]	MSOrder	Ions Matched	Annotation
	AGAEAANYPFATIDPNVGmVEVPDER	5	1	CID	M19(Oxidation)	36.7762	2.69441	0	1	3	2749.29	9.11895	2859	2859	49.1752	MS2	27/100
gi307128313	7.03	1	313	2.65469	putative ABC transporter subunit ComYA [Streptococcus pneumoniae 670-6B]
	Sequence	# Proteins	# Protein Groups	Activation Type	Modifications	Probability	XCorr	Δ Score	Rank	Charge	MH+ [Da]	ΔM [ppm]	First Scan	Last Scan	RT [min]	MSOrder	Ions Matched	Annotation
	QDNMLQLQLNEAIGLTYEnLIK	1	1	CID	N19(Deamidated)	2.67488	2.30697	0.610096	8	3	2562.33	17.4757	5066	5066	69.4156	MS2	19/84
gi307128478	11.58	2	259	2.61918	30S ribosomal protein S2 [Streptococcus pneumoniae 670-6B]
	Sequence	# Proteins	# Protein Groups	Activation Type	Modifications	Probability	XCorr	Δ Score	Rank	Charge	MH+ [Da]	ΔM [ppm]	First Scan	Last Scan	RT [min]	MSOrder	Ions Matched	Annotation
	LGIPVVAmVDTNTDPDDIDVIIPANDDAIR	6	1	CID	M8(Oxidation)	20.2139	1.96296	0	1	3	3193.59	-1.96045	4477	4477	63.8316	MS2	16/116
	LGIPVVAmVDTNTDPDDIDVIIPANDDAIR	6	1	CID	M8(Oxidation)	2.56597	1.66802	0.0487422	2	3	3193.59	-0.861816	4112	4112	60.5817	MS2	18/116
gi307127552	12.84	2	335	2.59858	6-phosphofructokinase [Streptococcus pneumoniae 670-6B]
	Sequence	# Proteins	# Protein Groups	Activation Type	Modifications	Probability	XCorr	Δ Score	Rank	Charge	MH+ [Da]	ΔM [ppm]	First Scan	Last Scan	RT [min]	MSOrder	Ions Matched	Annotation
	MVENPILGTAEEGALFSLTAEGK	6	1	CID		56.36	2.59858	0	1	2	2377.19	-3.74917	4478	4478	63.8376	MS2	17/44
	KHnIIVLAEGVMSAAEFGQK	6	1	CID	N3(Deamidated)	5.38095	1.25639	0.186049	2	3	2143.13	7.65035	4647	4647	65.3636	MS2	14/76
gi307127134	2.08	1	1058	2.58528	carbamoyl-phosphate synthase large subunit [Streptococcus pneumoniae 670-6B]
	Sequence	# Proteins	# Protein Groups	Activation Type	Modifications	Probability	XCorr	Δ Score	Rank	Charge	MH+ [Da]	ΔM [ppm]	First Scan	Last Scan	RT [min]	MSOrder	Ions Matched	Annotation
	LLHIFEIEQELGAHPQDLEVLK	9	1	CID		10.3942	2.58528	0	1	4	2571.38	3.0771	4130	4130	60.7458	MS2	26/126
gi307067525	8.97	2	446	2.53979	type IV secretory pathway, VirD2 components (relaxase) [Streptococcus pneumoniae AP200]
	Sequence	# Proteins	# Protein Groups	Activation Type	Modifications	Probability	XCorr	Δ Score	Rank	Charge	MH+ [Da]	ΔM [ppm]	First Scan	Last Scan	RT [min]	MSOrder	Ions Matched	Annotation
	mINKSNSWEEFLDnMKSIDYEIK	1	1	CID	M1(Oxidation) N14(Deamidated)	2.45568	0.990444	0.0200095	2	3	2851.31	-6.32645	2843	2843	49.0151	MS2	9/88
	SYHKIRYQSDELCKENK	1	1	CID		6.85377	0.908	0.678682	3	2	2141.03	-12.4413	3335	3335	53.6849	MS2	11/32
gi221231403	17.98	2	267	2.51984	cell filamentation protein fic-related protein [Streptococcus pneumoniae ATCC 700669]
	Sequence	# Proteins	# Protein Groups	Activation Type	Modifications	Probability	XCorr	Δ Score	Rank	Charge	MH+ [Da]	ΔM [ppm]	First Scan	Last Scan	RT [min]	MSOrder	Ions Matched	Annotation
	GELTYEQVYEDATAYHHTIDASTEEADLVSLR	8	1	CID		22.4053	2.51984	0	1	4	3626.68	0.123429	3863	3863	58.3432	MS2	25/186
	EFGFDIDNIPFqqHSK	3	1	CID	Q12(Deamidated) Q13(Deamidated)	2.46262	1.70772	0	1	3	1923.88	5.24644	4686	4686	65.7363	MS2	11/60
gi307127650	9.82	1	224	2.50446	transcriptional regulatory protein CiaR [Streptococcus pneumoniae 670-6B]
	Sequence	# Proteins	# Protein Groups	Activation Type	Modifications	Probability	XCorr	Δ Score	Rank	Charge	MH+ [Da]	ΔM [ppm]	First Scan	Last Scan	RT [min]	MSOrder	Ions Matched	Annotation
	GHGFELGADDYLTKPFYLEELK	3	1	CID		35.2583	2.50446	0	1	4	2542.26	5.62671	3884	3884	58.5169	MS2	30/126
gi307127072	12.18	2	312	2.47758	peptide methionine sulfoxide reductase MsrA/msrB [Streptococcus pneumoniae 670-6B]
	Sequence	# Proteins	# Protein Groups	Activation Type	Modifications	Probability	XCorr	Δ Score	Rank	Charge	MH+ [Da]	ΔM [ppm]	First Scan	Last Scan	RT [min]	MSOrder	Ions Matched	Annotation
	TGIYYQDEADLPAIYTVVQEQER	2	1	CID		10.1663	2.47758	0	1	3	2701.29	-4.90562	3558	3558	55.6987	MS2	21/88
	ELGGLRYCINSASLR	2	1	CID		3.12512	0.730626	0.565553	2	2	1651.87	7.37103	3238	3238	52.797	MS2	4/28
gi182684092	6.57	3	852	2.46582	hypothetical protein SPCG_1122 [Streptococcus pneumoniae CGSP14]
	Sequence	# Proteins	# Protein Groups	Activation Type	Modifications	Probability	XCorr	Δ Score	Rank	Charge	MH+ [Da]	ΔM [ppm]	First Scan	Last Scan	RT [min]	MSOrder	Ions Matched	Annotation
	QVDFEALDNLLER	21	5	CID		53.4336	2.46582	0	1	2	1561.79	1.78188	3805	3805	57.8389	MS2	16/24
	YYVEHPNERPHSDNGFGNASDHVQR	17	4	CID		31.5674	1.82903	0.0396246	3	4	2925.3	-0.0110237	206	206	8.80818	MS2	25/144
	TYDLLARIHqDLLDnKGR	3	3	CID	Q10(Deamidated) N15(Deamidated)	9.66769	1.28867	0.314033	4	3	2143.13	15.4406	4969	4969	68.3705	MS2	11/68
gi225857876	3.94	8	2970	2.43929	PblB [Streptococcus pneumoniae 70585]
	Sequence	# Proteins	# Protein Groups	Activation Type	Modifications	Probability	XCorr	Δ Score	Rank	Charge	MH+ [Da]	ΔM [ppm]	First Scan	Last Scan	RT [min]	MSOrder	Ions Matched	Annotation
	QGADNqISNLKTQVATNK	2	2	CID	Q6(Deamidated)	2.92506	2.41058	0.0117668	2	3	1930.99	4.27947	2600	2600	46.6002	MS2	14/68
	QGADNQISnLKTQVATNK	2	2	CID	N9(Deamidated)	2.92506	2.21632	0.0914047	5	3	1930.99	4.27947	2600	2600	46.6002	MS2	13/68
	GKHSILGqWGGDMVRnGYnLR	2	2	CID	Q8(Deamidated) N16(Deamidated) N19(Deamidated)	2.25254	1.53094	0.444135	2	3	2361.14	-3.24708	3589	3589	55.9639	MS2	18/80
	YSRGEMALYDHGGNNnYSVRRIK	1	1	CID	N16(Deamidated)	3.77974	1.1789	0.524173	4	3	2701.29	4.29838	3558	3558	55.6987	MS2	13/88
	nELAGASTLLAQEAKR	2	2	CID	N1(Deamidated)	3.34184	1.07748	0	1	2	1672.88	-10.6252	3701	3701	56.9279	MS2	6/30
	YSRGEMALYDHGGNnNYSVRRIK	1	1	CID	N15(Deamidated)	3.77974	1.07061	0.567882	5	3	2701.29	4.29838	3558	3558	55.6987	MS2	12/88
	EESTRqAIAVRELVnR	1	1	CID	Q6(Deamidated) N15(Deamidated)	17.5217	0.594271	0.668783	3	2	1872.96	-16.4882	3714	3714	57.0359	MS2	6/30
	NELAGASTLLAqEAKR	2	2	CID	Q12(Deamidated)	3.34184	0.578519	0.463082	2	2	1672.88	-10.6252	3701	3701	56.9279	MS2	8/30
gi307066694	1.32	3	3035	2.43929	PblB, putative [Streptococcus pneumoniae AP200]
	Sequence	# Proteins	# Protein Groups	Activation Type	Modifications	Probability	XCorr	Δ Score	Rank	Charge	MH+ [Da]	ΔM [ppm]	First Scan	Last Scan	RT [min]	MSOrder	Ions Matched	Annotation
	QGADNqISNLKTQVATNK	2	2	CID	Q6(Deamidated)	2.92506	2.41058	0.0117668	2	3	1930.99	4.27947	2600	2600	46.6002	MS2	14/68
	QGADNQISnLKTQVATNK	2	2	CID	N9(Deamidated)	2.92506	2.21632	0.0914047	5	3	1930.99	4.27947	2600	2600	46.6002	MS2	13/68
	SELTqTAEELASRIASVHLGRR	1	1	CID	Q5(Deamidated)	15.2267	1.11844	0.633926	2	4	2425.26	-19.823	5127	5127	69.9995	MS2	19/126
gi225853935	8.87	3	282	2.43627	capsular polysaccharide synthesis protein [Streptococcus pneumoniae JJA]
	Sequence	# Proteins	# Protein Groups	Activation Type	Modifications	Probability	XCorr	Δ Score	Rank	Charge	MH+ [Da]	ΔM [ppm]	First Scan	Last Scan	RT [min]	MSOrder	Ions Matched	Annotation
	LNHHIDYSIGVNnFYKFIVFSKVEK	2	1	CID	N13(Deamidated)	9.08028	2.43627	0	1	4	3012.59	28.8216	4309	4309	62.3388	MS2	25/144
	LNHHIDYSIGVnNFYKFIVFSKVEK	2	1	CID	N12(Deamidated)	9.08028	2.29266	0.0589453	3	4	3012.59	28.8216	4309	4309	62.3388	MS2	25/144
	LnHHIDYSIGVNNFYKFIVFSKVEK	2	1	CID	N2(Deamidated)	3.31085	1.62287	0.33387	4	4	3012.59	28.8216	4309	4309	62.3388	MS2	22/144
gi307127505	9.01	2	444	2.36938	tRNA:M(5)U-54 methyltransferase [Streptococcus pneumoniae 670-6B]
	Sequence	# Proteins	# Protein Groups	Activation Type	Modifications	Probability	XCorr	Δ Score	Rank	Charge	MH+ [Da]	ΔM [ppm]	First Scan	Last Scan	RT [min]	MSOrder	Ions Matched	Annotation
	QEFmDFHEALVNAEEAPLNSFEK	4	1	CID	M4(Oxidation)	32.2669	2.36938	0	1	3	2711.2	-24.5771	3427	3427	54.4851	MS2	19/88
	GDALTnAVGLLKEEMRR	4	1	CID	N6(Deamidated)	2.40614	1.08261	0	1	2	1873.97	-13.659	4455	4455	63.6363	MS2	7/32
gi307128481	15.07	2	272	2.33673	rod shape-determining protein MreC [Streptococcus pneumoniae 670-6B]
	Sequence	# Proteins	# Protein Groups	Activation Type	Modifications	Probability	XCorr	Δ Score	Rank	Charge	MH+ [Da]	ΔM [ppm]	First Scan	Last Scan	RT [min]	MSOrder	Ions Matched	Annotation
	VTTGGLGNFNVADIPVGEVVATTHSTDYLTR	1	1	CID		22.5635	2.33673	0	1	3	3204.62	1.5883	4100	4100	60.4797	MS2	19/120
	TYNENESLKK	1	1	CID		2.35938	0.706103	0.0800655	2	1	1225.62	10.88	4917	4917	67.884	MS2	5/18
gi307127349	7.59	1	474	2.33289	NADP-dependent glyceraldehyde-3-phosphate dehydrogenase [Streptococcus pneumoniae 670-6B]
	Sequence	# Proteins	# Protein Groups	Activation Type	Modifications	Probability	XCorr	Δ Score	Rank	Charge	MH+ [Da]	ΔM [ppm]	First Scan	Last Scan	RT [min]	MSOrder	Ions Matched	Annotation
	SSEQEITIYSPINQEELGTVPAmTQTEADEAmQAAR	8	1	CID	M23(Oxidation) M32(Oxidation)	41.1098	2.33289	0	1	3	3970.82	7.0385	2915	2915	49.7372	MS2	26/140
gi307128331	4.12	1	486	2.26636	glutamyl-tRNA synthetase [Streptococcus pneumoniae 670-6B]
	Sequence	# Proteins	# Protein Groups	Activation Type	Modifications	Probability	XCorr	Δ Score	Rank	Charge	MH+ [Da]	ΔM [ppm]	First Scan	Last Scan	RT [min]	MSOrder	Ions Matched	Annotation
	NADLETIFEmAKPFLEEAGR	8	1	CID	M10(Oxidation)	69.6975	2.26636	0	1	3	2297.11	0.50461	4608	4608	65.0197	MS2	22/76
gi307126435	13.82	2	217	2.25702	30S ribosomal protein S3 [Streptococcus pneumoniae 670-6B]
	Sequence	# Proteins	# Protein Groups	Activation Type	Modifications	Probability	XCorr	Δ Score	Rank	Charge	MH+ [Da]	ΔM [ppm]	First Scan	Last Scan	RT [min]	MSOrder	Ions Matched	Annotation
	ADIDYAWEEADTTYGK	1	1	CID		76.6033	2.25702	0	1	2	1847.8	-0.280772	2120	2120	41.263	MS2	16/30
	GGANVDALRAKLNK	1	1	CID		2.89033	0.412163	0.364914	3	2	1426.8	-12.1087	3927	3927	58.8913	MS2	6/26
gi307126755	12.58	1	159	2.23119	hypothetical protein SP670_0615 [Streptococcus pneumoniae 670-6B]
	Sequence	# Proteins	# Protein Groups	Activation Type	Modifications	Probability	XCorr	Δ Score	Rank	Charge	MH+ [Da]	ΔM [ppm]	First Scan	Last Scan	RT [min]	MSOrder	Ions Matched	Annotation
	EVVEPVIEAPFELVDIEYGK	4	1	CID		31.6645	2.23119	0	1	2	2275.17	-2.5987	4901	4901	67.7469	MS2	15/38
gi307067259	2.72	9	1947	2.19731	hypothetical protein SPAP_0630 [Streptococcus pneumoniae AP200]
	Sequence	# Proteins	# Protein Groups	Activation Type	Modifications	Probability	XCorr	Δ Score	Rank	Charge	MH+ [Da]	ΔM [ppm]	First Scan	Last Scan	RT [min]	MSOrder	Ions Matched	Annotation
	DKNTTSLDqnPELFAFnNEGInAPSSSGSK	2	1	CID	Q9(Deamidated) N10(Deamidated) N17(Deamidated) N22(Deamidated)	9.81321	1.57989	0.112772	3	3	3186.41	-8.56519	4961	4961	68.3011	MS2	15/116
	DKNTTSLDqnPELFAFNnEGInAPSSSGSK	2	1	CID	Q9(Deamidated) N10(Deamidated) N18(Deamidated) N22(Deamidated)	9.81321	1.55789	0.125126	4	3	3186.41	-8.56519	4961	4961	68.3011	MS2	15/116
	DKNTTSLDqNPELFAFnnEGInAPSSSGSK	2	1	CID	Q9(Deamidated) N17(Deamidated) N18(Deamidated) N22(Deamidated)	9.81321	1.5251	0.143541	5	3	3186.41	-8.56519	4961	4961	68.3011	MS2	17/116
	DKNTTSLDqnPELFAFnnEGINAPSSSGSK	2	1	CID	Q9(Deamidated) N10(Deamidated) N17(Deamidated) N18(Deamidated)	15.9251	1.50205	0.156488	6	3	3186.41	-8.56519	4961	4961	68.3011	MS2	13/116
	DKNTTSLDQnPELFAFnnEGInAPSSSGSK	2	1	CID	N10(Deamidated) N17(Deamidated) N18(Deamidated) N22(Deamidated)	9.81321	1.39389	0.217228	8	3	3186.41	-8.56519	4961	4961	68.3011	MS2	17/116
	DKnTTSLDQnPELFAFnNEGInAPSSSGSK	2	1	CID	N3(Deamidated) N10(Deamidated) N17(Deamidated) N22(Deamidated)	9.81321	1.34737	0.243351	9	3	3186.41	-8.56519	4961	4961	68.3011	MS2	16/116
	EIKGDKKYFTIK	6	2	CID		4.34762	0.447892	0.302329	2	3	1469.83	-4.419	3618	3618	56.217	MS2	9/44
	SKIYGVLSPSK	6	2	CID		2.83449	0.428135	0	1	2	1178.68	1.25552	4368	4368	62.8531	MS2	4/20
	EIKGDKKYFTIK	6	2	CID		2.37803	0.418754	0.00784934	2	3	1469.83	-5.79229	2879	2879	49.3953	MS2	8/44
gi298502440	4.35	7	2209	2.18327	beta-galactosidase [Streptococcus pneumoniae TCH8431/19A]
	Sequence	# Proteins	# Protein Groups	Activation Type	Modifications	Probability	XCorr	Δ Score	Rank	Charge	MH+ [Da]	ΔM [ppm]	First Scan	Last Scan	RT [min]	MSOrder	Ions Matched	Annotation
	TLSYGAQLPEVTASAENADVTVLQASAANGmR	8	1	CID	M31(Oxidation)	20.4115	2.18327	0	1	3	3251.59	2.23709	3064	3064	51.1586	MS2	22/124
	IVNTDDKDHELVAEYQIVER	8	1	CID		11.2506	1.55964	0.0238846	2	4	2386.19	-0.948524	1671	1671	35.5681	MS2	21/114
	IADELDAVGFNYSEDNYK	9	1	CID		37.4536	1.32172	0	1	2	2062.93	1.01513	2267	2267	42.9996	MS2	12/34
	AqADGSWIRK	9	1	CID	Q2(Deamidated)	2.49785	0.818965	0	1	1	1132.57	-0.38854	4270	4270	61.9887	MS2	8/18
	VDFNqnWHFKLnANSK	4	1	CID	Q5(Deamidated) N6(Deamidated) N12(Deamidated)	2.20929	0.620966	0.296519	2	2	1964.9	-9.93311	3067	3067	51.1823	MS2	7/30
	IADELDAVGFnYSEDnYK	9	1	CID	N11(Deamidated) N16(Deamidated)	15.3336	0.584513	0	1	2	2064.88	-15.845	2579	2579	46.3941	MS2	6/34
	VDFnQnWHFKLnANSK	4	1	CID	N4(Deamidated) N6(Deamidated) N12(Deamidated)	2.20929	0.572227	0.351736	3	2	1964.9	-9.93311	3067	3067	51.1823	MS2	7/30
gi307126694	7.64	4	628	2.17354	hypothetical protein SP670_0554 [Streptococcus pneumoniae 670-6B]
	Sequence	# Proteins	# Protein Groups	Activation Type	Modifications	Probability	XCorr	Δ Score	Rank	Charge	MH+ [Da]	ΔM [ppm]	First Scan	Last Scan	RT [min]	MSOrder	Ions Matched	Annotation
	LLNSQKDEWKQLSYHREYVVK	11	1	CID		15.4251	2.17354	0	1	3	2663.4	1.63377	4681	4681	65.693	MS2	18/80
	MVIRVFDqQKnTYSSFALEELSYYmnR	8	1	CID	Q8(Deamidated) N11(Deamidated) M25(Oxidation) N26(Deamidated)	9.90056	0.838448	0.75066	2	3	3351.58	26.5918	4078	4078	60.2788	MS2	15/104
	MVIRVFDQqKnTYSSFALEELSYYmnR	8	1	CID	Q9(Deamidated) N11(Deamidated) M25(Oxidation) N26(Deamidated)	9.90056	0.822469	0.755411	3	3	3351.58	26.5918	4078	4078	60.2788	MS2	14/104
	MVIRVFDqqKNTYSSFALEELSYYmnR	8	1	CID	Q8(Deamidated) Q9(Deamidated) M25(Oxidation) N26(Deamidated)	9.90056	0.76733	0.771809	4	3	3351.58	26.5918	4078	4078	60.2788	MS2	15/104
gi307068801	1.5	1	735	2.15068	choline binding protein A [Streptococcus pneumoniae AP200]
	Sequence	# Proteins	# Protein Groups	Activation Type	Modifications	Probability	XCorr	Δ Score	Rank	Charge	MH+ [Da]	ΔM [ppm]	First Scan	Last Scan	RT [min]	MSOrder	Ions Matched	Annotation
	GVPGEqATPDK	1	1	CID	Q6(Deamidated)	3.05964	0.465118	0	1	2	1099.52	-7.81087	1827	1827	37.6241	MS2	5/20
gi225858514	3.33	1	450	2.10928	UDP-N-acetylmuramoyl-L-alanyl-D-glutamate synthetase [Streptococcus pneumoniae 70585]
	Sequence	# Proteins	# Protein Groups	Activation Type	Modifications	Probability	XCorr	Δ Score	Rank	Charge	MH+ [Da]	ΔM [ppm]	First Scan	Last Scan	RT [min]	MSOrder	Ions Matched	Annotation
	GNEFDELVPDITGLK	10	1	CID		9.77328	2.10928	0	1	2	1646.83	-0.0852637	3456	3456	54.7374	MS2	13/28
gi307127049	5.17	2	484	2.10208	alpha-amylase [Streptococcus pneumoniae 670-6B]
	Sequence	# Proteins	# Protein Groups	Activation Type	Modifications	Probability	XCorr	Δ Score	Rank	Charge	MH+ [Da]	ΔM [ppm]	First Scan	Last Scan	RT [min]	MSOrder	Ions Matched	Annotation
	TKYGFKEDYLQAIQALK	9	1	CID		10.9382	2.10208	0	1	3	2016.08	-3.24389	3582	3582	55.9036	MS2	13/64
	HIDSFFMR	9	1	CID		2.73695	0.863355	0	1	1	1052.5	4.42426	6977	6977	89.2711	MS2	5/14
gi221232023	5.57	3	395	2.09112	integrase [Streptococcus pneumoniae ATCC 700669]
	Sequence	# Proteins	# Protein Groups	Activation Type	Modifications	Probability	XCorr	Δ Score	Rank	Charge	MH+ [Da]	ΔM [ppm]	First Scan	Last Scan	RT [min]	MSOrder	Ions Matched	Annotation
	KnQQGLPFNSFKEAYEEILRLK	1	1	CID	N2(Deamidated)	3.81547	2.09112	0	1	3	2653.4	-2.20188	5350	5350	72.2596	MS2	15/84
	KNqQGLPFNSFKEAYEEILRLK	1	1	CID	Q3(Deamidated)	3.81547	1.96298	0.0612782	3	3	2653.4	-2.20188	5350	5350	72.2596	MS2	15/84
	KNQqGLPFNSFKEAYEEILRLK	1	1	CID	Q4(Deamidated)	3.81547	1.95129	0.0668686	4	3	2653.4	-2.20188	5350	5350	72.2596	MS2	15/84
gi182683380	7.52	3	452	2.08939	seryl-tRNA synthetase [Streptococcus pneumoniae CGSP14]
	Sequence	# Proteins	# Protein Groups	Activation Type	Modifications	Probability	XCorr	Δ Score	Rank	Charge	MH+ [Da]	ΔM [ppm]	First Scan	Last Scan	RT [min]	MSOrder	Ions Matched	Annotation
	TVAAILEnYqNEDASVTIPEALRPYMGGAEVIKP	1	1	CID	N8(Deamidated) Q10(Deamidated)	10.2273	2.08939	0.358395	2	3	3661.84	10.5384	3936	3936	58.9687	MS2	18/132
	TVAAILEnYQnEDASVTIPEALRPYMGGAEVIKP	1	1	CID	N8(Deamidated) N11(Deamidated)	10.2273	2.06535	0.365778	3	3	3661.84	10.5384	3936	3936	58.9687	MS2	18/132
	TVAAILENYqnEDASVTIPEALRPYMGGAEVIKP	1	1	CID	Q10(Deamidated) N11(Deamidated)	10.2273	2.00311	0.38489	4	3	3661.84	10.5384	3936	3936	58.9687	MS2	17/132
gi298502238	4.23	1	544	2.07568	glycerone kinase [Streptococcus pneumoniae TCH8431/19A]
	Sequence	# Proteins	# Protein Groups	Activation Type	Modifications	Probability	XCorr	Δ Score	Rank	Charge	MH+ [Da]	ΔM [ppm]	First Scan	Last Scan	RT [min]	MSOrder	Ions Matched	Annotation
	DKDELTGQDLALAFQSGVEVAYK	6	1	CID		8.85494	2.07568	0	1	3	2497.25	-0.700995	3646	3646	56.4703	MS2	19/88
gi225859934	3.21	1	623	2.07331	F5/8 type C domain containing protein [Streptococcus pneumoniae 70585]
	Sequence	# Proteins	# Protein Groups	Activation Type	Modifications	Probability	XCorr	Δ Score	Rank	Charge	MH+ [Da]	ΔM [ppm]	First Scan	Last Scan	RT [min]	MSOrder	Ions Matched	Annotation
	FYTTDIVnKRAGVmIKnVSK	2	1	CID	N8(Deamidated) M14(Oxidation) N17(Deamidated)	17.04	0.650556	0	1	2	2302.21	1.93406	4772	4772	66.525	MS2	6/38
gi307127746	4.08	1	466	2.06464	Cof family peptidyl-prolyl cis-trans isomerase [Streptococcus pneumoniae 670-6B]
	Sequence	# Proteins	# Protein Groups	Activation Type	Modifications	Probability	XCorr	Δ Score	Rank	Charge	MH+ [Da]	ΔM [ppm]	First Scan	Last Scan	RT [min]	MSOrder	Ions Matched	Annotation
	TLEEDGIFDALEVFGmVEK	7	1	CID	M16(Oxidation)	19.0351	2.06464	0	1	3	2158.03	0.48918	5257	5257	71.2553	MS2	16/72
gi118090042	12.62	2	206	2.0587	truncated IS1381 transposase [Streptococcus pneumoniae TIGR4]
	Sequence	# Proteins	# Protein Groups	Activation Type	Modifications	Probability	XCorr	Δ Score	Rank	Charge	MH+ [Da]	ΔM [ppm]	First Scan	Last Scan	RT [min]	MSOrder	Ions Matched	Annotation
	LFKMSCRnIGqAGKILADSDYQGLMK	1	1	CID	N8(Deamidated) Q11(Deamidated)	15.3061	2.0587	0.496477	2	3	2889.45	21.7265	3605	3605	56.1018	MS2	18/100
	LFKMSCRNIGqAGKILADSDYqGLMK	1	1	CID	Q11(Deamidated) Q22(Deamidated)	8.6002	1.16586	0.714849	3	3	2889.45	21.7265	3605	3605	56.1018	MS2	13/100
gi307126256	5.59	2	322	2.04291	ribose-phosphate pyrophosphokinase [Streptococcus pneumoniae 670-6B]
	Sequence	# Proteins	# Protein Groups	Activation Type	Modifications	Probability	XCorr	Δ Score	Rank	Charge	MH+ [Da]	ΔM [ppm]	First Scan	Last Scan	RT [min]	MSOrder	Ions Matched	Annotation
	qFSDGEIqVNIEESIRGK	5	1	CID	Q1(Deamidated) Q8(Deamidated)	2.63981	0.664254	0	1	2	2051.01	15.7392	2887	2887	49.4858	MS2	7/34
	qFSDGEIQVnIEESIRGK	5	1	CID	Q1(Deamidated) N10(Deamidated)	2.63981	0.51786	0.22039	2	2	2051.01	15.7392	2887	2887	49.4858	MS2	6/34
gi307128383	5.83	1	429	2.03242	histidyl-tRNA synthetase [Streptococcus pneumoniae 670-6B]
	Sequence	# Proteins	# Protein Groups	Activation Type	Modifications	Probability	XCorr	Δ Score	Rank	Charge	MH+ [Da]	ΔM [ppm]	First Scan	Last Scan	RT [min]	MSOrder	Ions Matched	Annotation
	VAVENAPSILDFLDEESQTHFDAVR	7	1	CID		21.1912	2.03242	0	1	3	2802.35	-5.94326	4725	4725	66.0981	MS2	21/96
gi225857978	3.24	1	463	2.02934	argininosuccinate lyase [Streptococcus pneumoniae 70585]
	Sequence	# Proteins	# Protein Groups	Activation Type	Modifications	Probability	XCorr	Δ Score	Rank	Charge	MH+ [Da]	ΔM [ppm]	First Scan	Last Scan	RT [min]	MSOrder	Ions Matched	Annotation
	DFSNATELADYLAGK	4	1	CID		23.6658	2.02934	0	1	2	1614.77	2.47614	2985	2985	50.3765	MS2	10/28
gi307127396	3.52	1	369	2.01033	RNA polymerase sigma factor RpoD [Streptococcus pneumoniae 670-6B]
	Sequence	# Proteins	# Protein Groups	Activation Type	Modifications	Probability	XCorr	Δ Score	Rank	Charge	MH+ [Da]	ΔM [ppm]	First Scan	Last Scan	RT [min]	MSOrder	Ions Matched	Annotation
	EQLDEILDTLTDR	2	1	CID		29.3511	2.01033	0	1	2	1560.78	2.28212	3468	3468	54.8322	MS2	11/24
gi225858266	4.19	1	454	2.0039	aspartate kinase [Streptococcus pneumoniae 70585]
	Sequence	# Proteins	# Protein Groups	Activation Type	Modifications	Probability	XCorr	Δ Score	Rank	Charge	MH+ [Da]	ΔM [ppm]	First Scan	Last Scan	RT [min]	MSOrder	Ions Matched	Annotation
	VDHAEIEHDLSIImIVGEK	5	1	CID	M14(Oxidation)	20.0067	1.57605	0	1	4	2164.09	-1.17524	2918	2918	49.7547	MS2	19/108
gi307126632	18.92	2	74	1.97831	hypothetical protein SP670_0492 [Streptococcus pneumoniae 670-6B]
	Sequence	# Proteins	# Protein Groups	Activation Type	Modifications	Probability	XCorr	Δ Score	Rank	Charge	MH+ [Da]	ΔM [ppm]	First Scan	Last Scan	RT [min]	MSOrder	Ions Matched	Annotation
	TVGDLVAYVEEQAK	1	1	CID		79.3959	1.97831	0	1	2	1521.78	2.69286	3025	3025	50.7749	MS2	14/26
	TVGDLVAYVEEQAK	1	1	CID		5.18211	1.3591	0.248353	2	3	1521.78	1.06198	3058	3058	51.1039	MS2	17/52
gi307128111	9.13	1	208	1.95277	tRNA binding domain-containing protein [Streptococcus pneumoniae 670-6B]
	Sequence	# Proteins	# Protein Groups	Activation Type	Modifications	Probability	XCorr	Δ Score	Rank	Charge	MH+ [Da]	ΔM [ppm]	First Scan	Last Scan	RT [min]	MSOrder	Ions Matched	Annotation
	GVLELSEDQVVGTPFDPAK	6	1	CID		50.5481	1.95277	0	1	2	2001.02	-2.07077	2812	2812	48.6944	MS2	14/36
gi307126501	5.9	1	339	1.9417	alcohol dehydrogenase, propanol-preferring [Streptococcus pneumoniae 670-6B]
	Sequence	# Proteins	# Protein Groups	Activation Type	Modifications	Probability	XCorr	Δ Score	Rank	Charge	MH+ [Da]	ΔM [ppm]	First Scan	Last Scan	RT [min]	MSOrder	Ions Matched	Annotation
	DLEEAFQFGAEGLVVPVVQK	7	1	CID		13.0486	1.9417	0	1	2	2175.14	9.05028	4172	4172	61.1443	MS2	10/38
gi307126554	4.45	1	494	1.91482	hypothetical protein SP670_0410 [Streptococcus pneumoniae 670-6B]
	Sequence	# Proteins	# Protein Groups	Activation Type	Modifications	Probability	XCorr	Δ Score	Rank	Charge	MH+ [Da]	ΔM [ppm]	First Scan	Last Scan	RT [min]	MSOrder	Ions Matched	Annotation
	AEETGGPALAFELPNGEIVTGK	8	1	CID		58.1793	1.91482	0	1	2	2200.12	8.05419	2906	2906	49.6693	MS2	17/42
gi307126303	11.31	2	221	1.90627	Trk family potassium uptake protein [Streptococcus pneumoniae 670-6B]
	Sequence	# Proteins	# Protein Groups	Activation Type	Modifications	Probability	XCorr	Δ Score	Rank	Charge	MH+ [Da]	ΔM [ppm]	First Scan	Last Scan	RT [min]	MSOrder	Ions Matched	Annotation
	EQENSPLDVEFGPDDLLK	2	1	CID		36.4205	1.90627	0	1	2	2044.98	6.28122	3275	3275	53.1564	MS2	11/34
	VKSqTAK	2	1	CID	Q4(Deamidated)	5.06367	0.417448	0	1	1	762.443	6.87759	6117	6117	79.5504	MS2	2/12
gi307127896	4.17	1	456	1.90215	sialidase B [Streptococcus pneumoniae 670-6B]
	Sequence	# Proteins	# Protein Groups	Activation Type	Modifications	Probability	XCorr	Δ Score	Rank	Charge	MH+ [Da]	ΔM [ppm]	First Scan	Last Scan	RT [min]	MSOrder	Ions Matched	Annotation
	SLTVEQYSVDFDSGSLRER	6	1	CID		3.43167	0.46864	0.902763	2	2	2188.05	2.49552	3837	3837	58.1106	MS2	6/36
gi307128002	16.34	3	202	1.89402	Gls24 protein [Streptococcus pneumoniae 670-6B]
	Sequence	# Proteins	# Protein Groups	Activation Type	Modifications	Probability	XCorr	Δ Score	Rank	Charge	MH+ [Da]	ΔM [ppm]	First Scan	Last Scan	RT [min]	MSOrder	Ions Matched	Annotation
	VSDVAESTGEFTSEQFEK	1	1	CID		56.8554	1.89402	0	1	2	1989.89	0.164424	1701	1701	35.9255	MS2	14/34
	VSDVAESTGEFTSEQFEK	1	1	CID		47.3516	1.01175	0	1	2	1989.89	-1.66663	1499	1499	32.9006	MS2	12/34
	TKEQHEADSVSLqDR	1	1	CID	Q13(Deamidated)	4.44404	1.00569	0.233793	3	2	1743.81	-8.38943	2505	2505	45.5665	MS2	8/28
gi225854408	8.16	1	196	1.85704	hypothetical protein SPJ_0842 [Streptococcus pneumoniae JJA]
	Sequence	# Proteins	# Protein Groups	Activation Type	Modifications	Probability	XCorr	Δ Score	Rank	Charge	MH+ [Da]	ΔM [ppm]	First Scan	Last Scan	RT [min]	MSOrder	Ions Matched	Annotation
	ILPLDTELEETKNYIK	10	1	CID		5.71393	1.85704	0	1	2	1919.04	3.67985	5131	5131	70.0314	MS2	11/30
gi307128316	3.39	1	383	1.85199	N-acetylglucosamine-6-phosphate deacetylase [Streptococcus pneumoniae 670-6B]
	Sequence	# Proteins	# Protein Groups	Activation Type	Modifications	Probability	XCorr	Δ Score	Rank	Charge	MH+ [Da]	ΔM [ppm]	First Scan	Last Scan	RT [min]	MSOrder	Ions Matched	Annotation
	DLELVATYLDGVK	5	1	CID		32.3307	1.85199	0	1	2	1435.77	-1.058	3256	3256	52.9561	MS2	13/24
gi225858216	5.13	1	409	1.8242	UDP-2-acetamido-2,6-dideoxy-b-L-lyxo-4-hexulose 4-reductase [Streptococcus pneumoniae 70585]
	Sequence	# Proteins	# Protein Groups	Activation Type	Modifications	Probability	XCorr	Δ Score	Rank	Charge	MH+ [Da]	ΔM [ppm]	First Scan	Last Scan	RT [min]	MSOrder	Ions Matched	Annotation
	IGLDENGQEYPILNFEVSGDK	2	1	CID		29.4145	1.8242	0	1	2	2337.12	-1.99511	3299	3299	53.3604	MS2	16/40
gi307127998	5.48	2	493	1.81285	M protein trans-acting positive transcriptional regulator [Streptococcus pneumoniae 670-6B]
	Sequence	# Proteins	# Protein Groups	Activation Type	Modifications	Probability	XCorr	Δ Score	Rank	Charge	MH+ [Da]	ΔM [ppm]	First Scan	Last Scan	RT [min]	MSOrder	Ions Matched	Annotation
	mFFIDESLFMKCVKK	6	1	CID	M1(Oxidation)	16.6186	1.81285	0	1	2	1881.93	-0.178428	3185	3185	52.3233	MS2	9/28
	HLVINLLQNqPK	6	1	CID	Q10(Deamidated)	2.01297	0.452275	0.409637	2	2	1417.81	-4.77833	1937	1937	39.051	MS2	4/22
gi307127208	3.46	1	607	1.8114	GTP-binding protein LepA [Streptococcus pneumoniae 670-6B]
	Sequence	# Proteins	# Protein Groups	Activation Type	Modifications	Probability	XCorr	Δ Score	Rank	Charge	MH+ [Da]	ΔM [ppm]	First Scan	Last Scan	RT [min]	MSOrder	Ions Matched	Annotation
	SIGSVEVPQEAFLSVLSmDEE	9	1	CID	M18(Oxidation)	11.1111	1.8114	0	1	2	2282.07	-3.21964	4454	4454	63.6302	MS2	15/40
gi307126441	30	4	180	1.78188	50S ribosomal protein L5 (BL6) [Streptococcus pneumoniae 670-6B]
	Sequence	# Proteins	# Protein Groups	Activation Type	Modifications	Probability	XCorr	Δ Score	Rank	Charge	MH+ [Da]	ΔM [ppm]	First Scan	Last Scan	RT [min]	MSOrder	Ions Matched	Annotation
	EQLIFPEINFDDVDK	1	1	CID		14.5872	1.78188	0	1	2	1821.89	-2.13597	3770	3770	57.5147	MS2	12/28
	GLDIVIVTTANTDEESR	1	1	CID		33.5825	1.12155	0	1	2	1832.92	0.174424	2004	2004	39.8699	MS2	11/32
	VDKIVLnMGVGEAVSNAKSLEK	1	1	CID	N7(Deamidated)	2.60797	0.558359	0.20419	2	3	2302.22	-15.3321	4464	4464	63.7189	MS2	14/84
	VDKIVLNMGVGEAVSnAKSLEK	1	1	CID	N16(Deamidated)	2.60797	0.523396	0.254021	3	3	2302.22	-15.3321	4464	4464	63.7189	MS2	12/84
gi307067349	7.18	1	209	1.7787	Uracil phosphoribosyltransferase [Streptococcus pneumoniae AP200]
	Sequence	# Proteins	# Protein Groups	Activation Type	Modifications	Probability	XCorr	Δ Score	Rank	Charge	MH+ [Da]	ΔM [ppm]	First Scan	Last Scan	RT [min]	MSOrder	Ions Matched	Annotation
	DLPLEDVEIETPITK	6	1	CID		19.5999	1.7787	0	1	2	1711.9	0.0827831	2740	2740	48.0544	MS2	9/28
gi221231167	8.64	3	602	1.72927	glucosamine--fructose-6-phosphate aminotransferase [Streptococcus pneumoniae ATCC 700669]
	Sequence	# Proteins	# Protein Groups	Activation Type	Modifications	Probability	XCorr	Δ Score	Rank	Charge	MH+ [Da]	ΔM [ppm]	First Scan	Last Scan	RT [min]	MSOrder	Ions Matched	Annotation
	AnEMGIPSLTVTnVPGSTLSR	11	1	CID	N2(Deamidated) N13(Deamidated)	6.97187	1.72927	0	1	2	2146.09	20.4022	4158	4158	61.0036	MS2	7/40
	ETNqYMEIHDqELVIVKADSVEVQDYDGNSR	2	1	CID	Q4(Deamidated) Q11(Deamidated)	3.95695	1.69147	0.328738	3	4	3626.68	33.1114	3863	3863	58.3432	MS2	18/180
	ETnQYMEIHDqELVIVKADSVEVQDYDGNSR	2	1	CID	N3(Deamidated) Q11(Deamidated)	3.95695	1.60228	0.364135	5	4	3626.68	33.1114	3863	3863	58.3432	MS2	18/180
gi182684786	20.45	3	176	1.68174	hypothetical protein SPCG_1816 [Streptococcus pneumoniae CGSP14]
	Sequence	# Proteins	# Protein Groups	Activation Type	Modifications	Probability	XCorr	Δ Score	Rank	Charge	MH+ [Da]	ΔM [ppm]	First Scan	Last Scan	RT [min]	MSOrder	Ions Matched	Annotation
	ISSNRVNVALPYVGY	2	1	CID		18.0422	1.68174	0	1	2	1651.87	-14.389	3238	3238	52.797	MS2	8/28
	LRSqGIFqmK	2	1	CID	Q4(Deamidated) Q8(Deamidated) M9(Oxidation)	9.83487	0.767558	0	1	1	1225.62	-7.777	4917	4917	67.884	MS2	7/18
	WLnNNVHFVKR	1	1	CID	N3(Deamidated)	2.49115	0.678921	0.29794	3	2	1427.75	-5.34833	1911	1911	38.7258	MS2	9/20
gi182684083	20	1	85	1.65437	hypothetical protein SPCG_1113 [Streptococcus pneumoniae CGSP14]
	Sequence	# Proteins	# Protein Groups	Activation Type	Modifications	Probability	XCorr	Δ Score	Rank	Charge	MH+ [Da]	ΔM [ppm]	First Scan	Last Scan	RT [min]	MSOrder	Ions Matched	Annotation
	CSQIPCLTSEELKSLGK	1	1	CID		4.88029	1.65437	0.286042	2	2	1835.91	-13.0509	4623	4623	65.1469	MS2	7/32
gi307127263	7.62	2	210	1.64952	hypothetical protein SP670_1131 [Streptococcus pneumoniae 670-6B]
	Sequence	# Proteins	# Protein Groups	Activation Type	Modifications	Probability	XCorr	Δ Score	Rank	Charge	MH+ [Da]	ΔM [ppm]	First Scan	Last Scan	RT [min]	MSOrder	Ions Matched	Annotation
	KSESDLDFAEFVVQNR	2	1	CID		21.7941	1.64952	0.462012	2	2	1883.9	-11.202	2493	2493	45.4489	MS2	11/30
	KSESDLDFAEFVVQNR	2	1	CID		4.0856	0.867493	0.178784	4	2	1883.9	-16.0848	2796	2796	48.5437	MS2	9/30
gi307067491	4.73	6	275	1.61538	DNA replication protein [Streptococcus pneumoniae AP200]
	Sequence	# Proteins	# Protein Groups	Activation Type	Modifications	Probability	XCorr	Δ Score	Rank	Charge	MH+ [Da]	ΔM [ppm]	First Scan	Last Scan	RT [min]	MSOrder	Ions Matched	Annotation
	IMnLSqVINQIqK	1	1	CID	N3(Deamidated) Q6(Deamidated) Q12(Deamidated)	4.87804	1.61538	0	1	2	1531.81	8.00381	5407	5407	72.7706	MS2	8/24
	IMnLSqVINqIQK	1	1	CID	N3(Deamidated) Q6(Deamidated) Q10(Deamidated)	4.87804	1.56573	0.0307394	2	2	1531.81	8.00381	5407	5407	72.7706	MS2	8/24
	IMnLSqVInQIQK	1	1	CID	N3(Deamidated) Q6(Deamidated) N9(Deamidated)	4.87804	1.50235	0.0699709	3	2	1531.81	8.00381	5407	5407	72.7706	MS2	8/24
	IMnLSQVInQIqK	1	1	CID	N3(Deamidated) N9(Deamidated) Q12(Deamidated)	4.87804	1.34541	0.167128	4	2	1531.81	8.00381	5407	5407	72.7706	MS2	8/24
	IMnLSQVINqIqK	1	1	CID	N3(Deamidated) Q10(Deamidated) Q12(Deamidated)	4.87804	1.33222	0.17529	5	2	1531.81	8.00381	5407	5407	72.7706	MS2	7/24
	IMnLSQVInqIQK	1	1	CID	N3(Deamidated) N9(Deamidated) Q10(Deamidated)	4.87804	1.29575	0.197867	6	2	1531.81	8.00381	5407	5407	72.7706	MS2	8/24
gi307127750	7.37	1	217	1.60493	asparaginyl-tRNA synthetase [Streptococcus pneumoniae 670-6B]
	Sequence	# Proteins	# Protein Groups	Activation Type	Modifications	Probability	XCorr	Δ Score	Rank	Charge	MH+ [Da]	ΔM [ppm]	First Scan	Last Scan	RT [min]	MSOrder	Ions Matched	Annotation
	KYGTVPHGGFGIGIER	7	1	CID		13.6335	1.60493	0	1	2	1687.88	-14.6626	3810	3810	57.8738	MS2	7/30
gi307126161	22.22	1	90	0	phage protein [Streptococcus pneumoniae 670-6B]
	Sequence	# Proteins	# Protein Groups	Activation Type	Modifications	Probability	XCorr	Δ Score	Rank	Charge	MH+ [Da]	ΔM [ppm]	First Scan	Last Scan	RT [min]	MSOrder	Ions Matched	Annotation
	YQPPDDGSRmIYYLVTDIWK	1	1	CID	M10(Oxidation)	8.8349	1.75461	0.00127491	2	4	2476.17	-19.7362	5422	5422	72.8809	MS2	22/114
gi307126181	14.77	1	88	0	ribosome-associated heat shock protein [Streptococcus pneumoniae 670-6B]
	Sequence	# Proteins	# Protein Groups	Activation Type	Modifications	Probability	XCorr	Δ Score	Rank	Charge	MH+ [Da]	ΔM [ppm]	First Scan	Last Scan	RT [min]	MSOrder	Ions Matched	Annotation
	TVAKEVADKGRIK	1	1	CID		2.31442	0.419946	0	1	2	1414.83	-2.83483	2419	2419	44.6262	MS2	3/24
gi307126184	9.95	3	422	0	beta-lactamase [Streptococcus pneumoniae 670-6B]
	Sequence	# Proteins	# Protein Groups	Activation Type	Modifications	Probability	XCorr	Δ Score	Rank	Charge	MH+ [Da]	ΔM [ppm]	First Scan	Last Scan	RT [min]	MSOrder	Ions Matched	Annotation
	LYNSPYDLKEVKSSLSAYSqVSIDK	1	1	CID	Q20(Deamidated)	14.5	1.40942	0.22481	4	4	2835.44	5.27407	4583	4583	64.7958	MS2	17/144
	EAGInQDEKmYAASVLK	1	1	CID	N5(Deamidated) M10(Oxidation)	3.72576	0.903925	0.144295	2	2	1883.9	-8.22583	2796	2796	48.5437	MS2	4/32
	EAGINqDEKmYAASVLK	1	1	CID	Q6(Deamidated) M10(Oxidation)	3.72576	0.880401	0.166565	3	2	1883.9	-8.22583	2796	2796	48.5437	MS2	4/32
gi307126208	19.64	11	224	0	DNA methylase [Streptococcus pneumoniae 670-6B]
	Sequence	# Proteins	# Protein Groups	Activation Type	Modifications	Probability	XCorr	Δ Score	Rank	Charge	MH+ [Da]	ΔM [ppm]	First Scan	Last Scan	RT [min]	MSOrder	Ions Matched	Annotation
	YmWnGMmqGKSISEGHIQQGNK	1	1	CID	M2(Oxidation) N4(Deamidated) M7(Oxidation) Q8(Deamidated)	9.95263	1.92468	0	1	4	2558.14	24.9117	4354	4354	62.7214	MS2	20/126
	YmWnGmMqGKSISEGHIQQGNK	1	1	CID	M2(Oxidation) N4(Deamidated) M6(Oxidation) Q8(Deamidated)	9.95263	1.89459	0.0156321	2	4	2558.14	24.9117	4354	4354	62.7214	MS2	21/126
	YmWnGMmQGKSISEGHIqQGNK	1	1	CID	M2(Oxidation) N4(Deamidated) M7(Oxidation) Q18(Deamidated)	4.29473	1.29983	0.32465	3	4	2558.14	24.9117	4354	4354	62.7214	MS2	19/126
	YmWnGmMQGKSISEGHIqQGNK	1	1	CID	M2(Oxidation) N4(Deamidated) M6(Oxidation) Q18(Deamidated)	4.29473	1.27215	0.339033	4	4	2558.14	24.9117	4354	4354	62.7214	MS2	20/126
	YmWNGmMqGKSISEGHIqQGNK	1	1	CID	M2(Oxidation) M6(Oxidation) Q8(Deamidated) Q18(Deamidated)	4.29473	1.2472	0.351994	6	4	2558.14	24.9117	4354	4354	62.7214	MS2	20/126
	YmWnGMmQGKSISEGHIQQGnK	1	1	CID	M2(Oxidation) N4(Deamidated) M7(Oxidation) N21(Deamidated)	4.29473	1.2285	0.361712	7	4	2558.14	24.9117	4354	4354	62.7214	MS2	19/126
	YmWnGmMQGKSISEGHIQQGnK	1	1	CID	M2(Oxidation) N4(Deamidated) M6(Oxidation) N21(Deamidated)	4.29473	1.21052	0.371052	8	4	2558.14	24.9117	4354	4354	62.7214	MS2	20/126
	YmWnGMmQGKSISEGHIQqGNK	1	1	CID	M2(Oxidation) N4(Deamidated) M7(Oxidation) Q19(Deamidated)	4.29473	1.19849	0.377304	9	4	2558.14	24.9117	4354	4354	62.7214	MS2	19/126
	YmWNGMmqGKSISEGHIqQGNK	1	1	CID	M2(Oxidation) M7(Oxidation) Q8(Deamidated) Q18(Deamidated)	4.29473	1.19147	0.380949	10	4	2558.14	24.9117	4354	4354	62.7214	MS2	20/126
	QYPDnYFDLAIVDPPYFSGPEK	1	1	CID	N5(Deamidated)	2.92431	0.437845	0.891032	3	2	2576.19	-1.49697	3229	3229	52.7317	MS2	7/42
	qYPDNYFDLAIVDPPYFSGPEK	1	1	CID	Q1(Deamidated)	2.92431	0.437845	0.891032	2	2	2576.19	-1.49697	3229	3229	52.7317	MS2	7/42
gi307126225	3.29	2	487	0	gp34 [Streptococcus pneumoniae 670-6B]
	Sequence	# Proteins	# Protein Groups	Activation Type	Modifications	Probability	XCorr	Δ Score	Rank	Charge	MH+ [Da]	ΔM [ppm]	First Scan	Last Scan	RT [min]	MSOrder	Ions Matched	Annotation
	IISTYEITSLLSNYqK	1	1	CID	Q15(Deamidated)	10.0752	0.858917	0.206623	3	2	1873.97	-12.899	4455	4455	63.6363	MS2	4/30
	IISTYEITSLLSnYQK	1	1	CID	N13(Deamidated)	10.0752	0.838579	0.22541	4	2	1873.97	-12.899	4455	4455	63.6363	MS2	4/30
gi307126240	3.9	1	821	0	PblA [Streptococcus pneumoniae 670-6B]
	Sequence	# Proteins	# Protein Groups	Activation Type	Modifications	Probability	XCorr	Δ Score	Rank	Charge	MH+ [Da]	ΔM [ppm]	First Scan	Last Scan	RT [min]	MSOrder	Ions Matched	Annotation
	AILDGFLGGLKSAWGAVTDFVGGIASWIRDHK	1	1	CID		6.09346	1.73055	0	1	3	3357.79	12.8853	5631	5631	74.8064	MS2	16/124
gi307126242	3.08	6	2699	0	PblB [Streptococcus pneumoniae 670-6B]
	Sequence	# Proteins	# Protein Groups	Activation Type	Modifications	Probability	XCorr	Δ Score	Rank	Charge	MH+ [Da]	ΔM [ppm]	First Scan	Last Scan	RT [min]	MSOrder	Ions Matched	Annotation
	GKHSILGqWGGDMVRnGYnLR	2	2	CID	Q8(Deamidated) N16(Deamidated) N19(Deamidated)	2.25254	1.53094	0.444135	2	3	2361.14	-3.24708	3589	3589	55.9639	MS2	18/80
	VKLQTYWqVnDnSGISPIFTLK	1	1	CID	Q8(Deamidated) N10(Deamidated) N12(Deamidated)	12.3401	1.21675	0.562972	5	3	2554.32	15.2708	4392	4392	63.0625	MS2	13/84
	nELAGASTLLAQEAKR	2	2	CID	N1(Deamidated)	3.34184	1.07748	0	1	2	1672.88	-10.6252	3701	3701	56.9279	MS2	6/30
	VKLQTYWqVnDnSGISPIFTLK	1	1	CID	Q8(Deamidated) N10(Deamidated) N12(Deamidated)	2.72055	1.01721	0.532463	3	3	2554.32	10.5101	4049	4049	60.022	MS2	15/84
	DQIGIAQDGFYISQGTYTMSCWVK	1	1	CID		10.8784	0.913446	0	1	4	2711.23	-19.1988	4483	4483	63.8953	MS2	23/138
	NELAGASTLLAqEAKR	2	2	CID	Q12(Deamidated)	3.34184	0.578519	0.463082	2	2	1672.88	-10.6252	3701	3701	56.9279	MS2	8/30
gi307126271	1.95	1	717	0	transport/processing ATP-binding protein ComA [Streptococcus pneumoniae 670-6B]
	Sequence	# Proteins	# Protein Groups	Activation Type	Modifications	Probability	XCorr	Δ Score	Rank	Charge	MH+ [Da]	ΔM [ppm]	First Scan	Last Scan	RT [min]	MSOrder	Ions Matched	Annotation
	HVFHLPMSFFATRR	1	1	CID		5.18984	0.587805	0.141053	2	3	1745.91	0.838028	4600	4600	64.9475	MS2	7/52
gi307126285	2.31	1	432	0	adenylosuccinate lyase [Streptococcus pneumoniae 670-6B]
	Sequence	# Proteins	# Protein Groups	Activation Type	Modifications	Probability	XCorr	Δ Score	Rank	Charge	MH+ [Da]	ΔM [ppm]	First Scan	Last Scan	RT [min]	MSOrder	Ions Matched	Annotation
	EHKFTIMMGR	1	1	CID		4.986	0.484346	0	1	2	1249.61	-11.5884	1022	1022	25.2402	MS2	4/18
gi307126423	3.27	1	735	0	anaerobic ribonucleoside-triphosphate reductase [Streptococcus pneumoniae 670-6B]
	Sequence	# Proteins	# Protein Groups	Activation Type	Modifications	Probability	XCorr	Δ Score	Rank	Charge	MH+ [Da]	ΔM [ppm]	First Scan	Last Scan	RT [min]	MSOrder	Ions Matched	Annotation
	VPmGCRSFLQGWKDENGVEVNSGR	1	1	CID	M3(Oxidation)	7.9629	1.62811	0.590662	2	3	2681.23	-23.082	2439	2439	44.8758	MS2	13/92
gi307126432	15.16	3	277	0	50S ribosomal protein L2 [Streptococcus pneumoniae 670-6B]
	Sequence	# Proteins	# Protein Groups	Activation Type	Modifications	Probability	XCorr	Δ Score	Rank	Charge	MH+ [Da]	ΔM [ppm]	First Scan	Last Scan	RT [min]	MSOrder	Ions Matched	Annotation
	NmTSLDFAEITTSTPEK	1	1	CID	M2(Oxidation)	16.6728	1.59709	0	1	2	1900.89	0.643135	1913	1913	38.7497	MS2	13/32
	HQGGGHKRFYRLVDFK	1	1	CID		6.82705	0.713788	0.74625	4	2	1945.03	-0.964756	3022	3022	50.75	MS2	8/30
	nNNGRITVRHQGGGHK	1	1	CID	N1(Deamidated)	3.9526	0.430527	0.37088	4	3	1745.91	16.282	4600	4600	64.9475	MS2	8/60
gi307126463	11.24	2	258	0	pyruvate formate-lyase 3 [Streptococcus pneumoniae 670-6B]
	Sequence	# Proteins	# Protein Groups	Activation Type	Modifications	Probability	XCorr	Δ Score	Rank	Charge	MH+ [Da]	ΔM [ppm]	First Scan	Last Scan	RT [min]	MSOrder	Ions Matched	Annotation
	GCPLRCPWCSNPESQRMKPEK	1	1	CID		2.34347	1.64161	0	1	3	2446.1	-20.7022	4532	4532	64.3125	MS2	14/80
	MKPEKMKDAqREK	1	1	CID	Q10(Deamidated)	7.08273	0.497702	0.370096	3	3	1619.84	14.1799	3436	3436	54.5639	MS2	8/48
gi307126469	3.69	5	812	0	pyruvate formate-lyase [Streptococcus pneumoniae 670-6B]
	Sequence	# Proteins	# Protein Groups	Activation Type	Modifications	Probability	XCorr	Δ Score	Rank	Charge	MH+ [Da]	ΔM [ppm]	First Scan	Last Scan	RT [min]	MSOrder	Ions Matched	Annotation
	AYmLKEILENMSIYIEEESMIAGnqASSNK	1	1	CID	M3(Oxidation) N24(Deamidated) Q25(Deamidated)	3.16378	1.52517	0.685475	5	3	3424.55	-30.8022	3935	3935	58.9627	MS2	14/116
	AYmLKEILENMSIYIEEESMIAGnQASSnK	1	1	CID	M3(Oxidation) N24(Deamidated) N29(Deamidated)	3.16378	1.50323	0.689998	6	3	3424.55	-30.8022	3935	3935	58.9627	MS2	14/116
	AYmLKEILENMSIYIEEESMIAGNqASSnK	1	1	CID	M3(Oxidation) Q25(Deamidated) N29(Deamidated)	3.16378	1.44461	0.702088	7	3	3424.55	-30.8022	3935	3935	58.9627	MS2	14/116
	AYMLKEILENmSIYIEEESMIAGnqASSNK	1	1	CID	M11(Oxidation) N24(Deamidated) Q25(Deamidated)	3.16378	1.36473	0.718561	8	3	3424.55	-30.8022	3935	3935	58.9627	MS2	13/116
	AYMLKEILENmSIYIEEESMIAGnQASSnK	1	1	CID	M11(Oxidation) N24(Deamidated) N29(Deamidated)	3.16378	1.35386	0.720802	9	3	3424.55	-30.8022	3935	3935	58.9627	MS2	13/116
gi307126526	0.84	1	1067	0	hyaluronate lyase [Streptococcus pneumoniae 670-6B]
	Sequence	# Proteins	# Protein Groups	Activation Type	Modifications	Probability	XCorr	Δ Score	Rank	Charge	MH+ [Da]	ΔM [ppm]	First Scan	Last Scan	RT [min]	MSOrder	Ions Matched	Annotation
	YYqDETVVR	1	1	CID	Q3(Deamidated)	4.19502	0.45788	0	1	1	1173.54	-0.519243	3764	3764	57.462	MS2	5/16
gi307126594	13.88	5	317	0	diphosphomevalonate decarboxylase [Streptococcus pneumoniae 670-6B]
	Sequence	# Proteins	# Protein Groups	Activation Type	Modifications	Probability	XCorr	Δ Score	Rank	Charge	MH+ [Da]	ΔM [ppm]	First Scan	Last Scan	RT [min]	MSOrder	Ions Matched	Annotation
	DGMKLCVETSTTFDDWVRqSEK	1	1	CID	Q19(Deamidated)	8.61029	1.24536	0.769326	2	3	2576.19	21.2458	3346	3346	53.7826	MS2	12/84
	MDREPVTVRSYANIAIIKYWGK	1	1	CID		5.19234	1.12187	0.620163	2	3	2610.4	16.787	3498	3498	55.0921	MS2	14/84
	DGMKLCVETSTTFDDWVRqSEK	1	1	CID	Q19(Deamidated)	3.13177	0.888572	0.863618	5	3	2576.19	20.8796	3024	3024	50.7688	MS2	14/84
	SYAnIAIIK	1	1	CID	N4(Deamidated)	2.21357	0.703357	0	1	2	993.562	0.318912	4397	4397	63.1032	MS2	3/16
	DGMKLCVETSTTFDDWVRqSEK	1	1	CID	Q19(Deamidated)	2.09409	0.444194	0.872908	2	2	2576.18	18.4516	2917	2917	49.7487	MS2	6/42
gi307126631	7.41	1	324	0	beta-ketoacyl-acyl carrier protein synthase III [Streptococcus pneumoniae 670-6B]
	Sequence	# Proteins	# Protein Groups	Activation Type	Modifications	Probability	XCorr	Δ Score	Rank	Charge	MH+ [Da]	ΔM [ppm]	First Scan	Last Scan	RT [min]	MSOrder	Ions Matched	Annotation
	QTIDESPIEVTDLDYLLLHQANDR	1	1	CID		13.6893	1.79906	0	1	3	2798.39	10.4082	4093	4093	60.4126	MS2	19/92
gi307126771	2.15	1	883	0	valyl-tRNA synthetase [Streptococcus pneumoniae 670-6B]
	Sequence	# Proteins	# Protein Groups	Activation Type	Modifications	Probability	XCorr	Δ Score	Rank	Charge	MH+ [Da]	ΔM [ppm]	First Scan	Last Scan	RT [min]	MSOrder	Ions Matched	Annotation
	FNDTFLqWmENVHDWVISR	1	1	CID	Q7(Deamidated) M9(Oxidation)	3.67787	0.81375	0	1	3	2454.1	-18.2805	2858	2858	49.169	MS2	9/72
gi307126814	1.22	1	410	0	alanine-adding enzyme MurN [Streptococcus pneumoniae 670-6B]
	Sequence	# Proteins	# Protein Groups	Activation Type	Modifications	Probability	XCorr	Δ Score	Rank	Charge	MH+ [Da]	ΔM [ppm]	First Scan	Last Scan	RT [min]	MSOrder	Ions Matched	Annotation
	QNqLR	1	1	CID	Q3(Deamidated)	4.33464	0.434851	0.16833	3	1	659.349	1.55656	1733	1733	36.353	MS2	4/8
gi307126839	2.1	4	2143	0	serine protease [Streptococcus pneumoniae 670-6B]
	Sequence	# Proteins	# Protein Groups	Activation Type	Modifications	Probability	XCorr	Δ Score	Rank	Charge	MH+ [Da]	ΔM [ppm]	First Scan	Last Scan	RT [min]	MSOrder	Ions Matched	Annotation
	FVESFIHFESVEEMEALSSNGK	1	1	CID		3.88883	0.861856	0	1	2	2516.16	-6.11815	5023	5023	68.9508	MS2	7/42
	EIKGDKKYFTIK	6	2	CID		4.34762	0.447892	0.302329	2	3	1469.83	-4.419	3618	3618	56.217	MS2	9/44
	SKIYGVLSPSK	6	2	CID		2.83449	0.428135	0	1	2	1178.68	1.25552	4368	4368	62.8531	MS2	4/20
	EIKGDKKYFTIK	6	2	CID		2.37803	0.418754	0.00784934	2	3	1469.83	-5.79229	2879	2879	49.3953	MS2	8/44
gi307126859	1.63	7	1969	0	zinc metalloprotease ZmpB [Streptococcus pneumoniae 670-6B]
	Sequence	# Proteins	# Protein Groups	Activation Type	Modifications	Probability	XCorr	Δ Score	Rank	Charge	MH+ [Da]	ΔM [ppm]	First Scan	Last Scan	RT [min]	MSOrder	Ions Matched	Annotation
	ITGTLSGRNnVAGFVnNMNDGTRIENVAFFGK	1	1	CID	N10(Deamidated) N16(Deamidated)	3.86575	1.81773	0.093477	3	5	3415.64	-29.7152	4825	4825	67.0092	MS2	36/248
	ITGTLSGRnNVAGFVnNMNDGTRIENVAFFGK	1	1	CID	N9(Deamidated) N16(Deamidated)	3.86575	1.78475	0.109926	4	5	3415.64	-29.7152	4825	4825	67.0092	MS2	36/248
	ITGTLSGRNnVAGFVNnMNDGTRIENVAFFGK	1	1	CID	N10(Deamidated) N17(Deamidated)	8.92729	1.54213	0.230923	6	5	3415.64	-29.7152	4825	4825	67.0092	MS2	36/248
	ITGTLSGRnNVAGFVNnMNDGTRIENVAFFGK	1	1	CID	N9(Deamidated) N17(Deamidated)	8.92729	1.50915	0.247371	7	5	3415.64	-29.7152	4825	4825	67.0092	MS2	36/248
	ITGTLSGRNNVAGFVnnMNDGTRIENVAFFGK	1	1	CID	N16(Deamidated) N17(Deamidated)	8.92729	1.46887	0.267461	8	5	3415.64	-29.7152	4825	4825	67.0092	MS2	37/248
	ITGTLSGRNnVAGFVNNMNDGTRIEnVAFFGK	1	1	CID	N10(Deamidated) N26(Deamidated)	3.86575	1.25155	0.375837	9	5	3415.64	-29.7152	4825	4825	67.0092	MS2	33/248
	ITGTLSGRNNVAGFVnNMNDGTRIEnVAFFGK	1	1	CID	N16(Deamidated) N26(Deamidated)	3.86575	1.19176	0.405655	10	5	3415.64	-29.7152	4825	4825	67.0092	MS2	34/248
gi307126961	5.66	2	459	0	NADH oxidase [Streptococcus pneumoniae 670-6B]
	Sequence	# Proteins	# Protein Groups	Activation Type	Modifications	Probability	XCorr	Δ Score	Rank	Charge	MH+ [Da]	ΔM [ppm]	First Scan	Last Scan	RT [min]	MSOrder	Ions Matched	Annotation
	EVVLVDIVDTVLNGYYDKDFTQmmAK	1	1	CID	M23(Oxidation) M24(Oxidation)	51.7525	1.96767	0	1	3	3038.47	-1.94435	5584	5584	74.3943	MS2	22/100
	EVVLVDIVDTVLNGYYDK	1	1	CID		19.9132	1.38116	0	1	2	2054.07	3.51021	5632	5632	74.8124	MS2	12/34
gi307127022	7.45	1	376	0	putative oxygen-independent coproporphyrinogen III oxidase [Streptococcus pneumoniae 670-6B]
	Sequence	# Proteins	# Protein Groups	Activation Type	Modifications	Probability	XCorr	Δ Score	Rank	Charge	MH+ [Da]	ΔM [ppm]	First Scan	Last Scan	RT [min]	MSOrder	Ions Matched	Annotation
	HnLmYWDNAEYYGIGAGASGYVnGVRYK	1	1	CID	N2(Deamidated) M4(Oxidation) N23(Deamidated)	5.65118	1.65688	0.0695359	2	3	3186.41	-11.3782	4961	4961	68.3011	MS2	16/108
gi307127057	8.72	2	367	0	prephenate dehydrogenase [Streptococcus pneumoniae 670-6B]
	Sequence	# Proteins	# Protein Groups	Activation Type	Modifications	Probability	XCorr	Δ Score	Rank	Charge	MH+ [Da]	ΔM [ppm]	First Scan	Last Scan	RT [min]	MSOrder	Ions Matched	Annotation
	GGVDSSYDLYVDVPDEEDVILR	1	1	CID		2.64549	1.36981	0	1	2	2455.15	-4.43519	3420	3420	54.4322	MS2	11/42
	EqRQTmEIHK	1	1	CID	Q2(Deamidated) M6(Oxidation)	5.08988	0.881885	0	1	1	1316.63	-1.26022	4508	4508	64.1151	MS2	4/18
gi307127062	5.9	3	424	0	LytR family transcriptional regulator [Streptococcus pneumoniae 670-6B]
	Sequence	# Proteins	# Protein Groups	Activation Type	Modifications	Probability	XCorr	Δ Score	Rank	Charge	MH+ [Da]	ΔM [ppm]	First Scan	Last Scan	RT [min]	MSOrder	Ions Matched	Annotation
	qTDNKLnVAYELGEQEGqKGAEMVR	1	1	CID	Q1(Deamidated) N7(Deamidated) Q18(Deamidated)	4.64765	1.6955	0.519042	3	3	2810.31	-4.63138	5179	5179	70.5101	MS2	21/96
	QTDnKLnVAYELGEQEGqKGAEMVR	1	1	CID	N4(Deamidated) N7(Deamidated) Q18(Deamidated)	4.64765	1.60286	0.54532	5	3	2810.31	-4.63138	5179	5179	70.5101	MS2	21/96
	qTDNKLnVAYELGEqEGQKGAEMVR	1	1	CID	Q1(Deamidated) N7(Deamidated) Q15(Deamidated)	4.64765	1.24486	0.646874	9	3	2810.31	-4.63138	5179	5179	70.5101	MS2	19/96
gi307127084	2.57	1	740	0	sialidase B [Streptococcus pneumoniae 670-6B]
	Sequence	# Proteins	# Protein Groups	Activation Type	Modifications	Probability	XCorr	Δ Score	Rank	Charge	MH+ [Da]	ΔM [ppm]	First Scan	Last Scan	RT [min]	MSOrder	Ions Matched	Annotation
	IPVLYTFSnGRVFSSIDAR	1	1	CID	N9(Deamidated)	8.69841	1.87862	0	1	3	2143.13	11.4166	4969	4969	68.3705	MS2	17/72
gi307127128	25.71	2	105	0	BlpT protein, fusion [Streptococcus pneumoniae 670-6B]
	Sequence	# Proteins	# Protein Groups	Activation Type	Modifications	Probability	XCorr	Δ Score	Rank	Charge	MH+ [Da]	ΔM [ppm]	First Scan	Last Scan	RT [min]	MSOrder	Ions Matched	Annotation
	SYQNCKQGTADDIRLqELLNTTMqELK	1	1	CID	Q16(Deamidated) Q24(Deamidated)	2.95548	1.73432	0.111553	7	4	3142.48	-20.4245	2296	2296	43.3132	MS2	22/156
	SYQNCKQGTADDIRLqELLnTTMQELK	1	1	CID	Q16(Deamidated) N20(Deamidated)	2.95548	1.7148	0.121554	8	4	3142.48	-20.4245	2296	2296	43.3132	MS2	23/156
gi307127163	5.43	5	1179	0	chromosome segregation protein SMC [Streptococcus pneumoniae 670-6B]
	Sequence	# Proteins	# Protein Groups	Activation Type	Modifications	Probability	XCorr	Δ Score	Rank	Charge	MH+ [Da]	ΔM [ppm]	First Scan	Last Scan	RT [min]	MSOrder	Ions Matched	Annotation
	qADqLEKLKEQLATAK	1	1	CID	Q1(Deamidated) Q4(Deamidated)	4.92889	1.26556	0.472223	3	2	1815.97	-0.63742	5589	5589	74.4249	MS2	8/30
	KFLDLEGqRK	1	1	CID	Q8(Deamidated)	6.14493	1.08336	0	1	2	1234.67	-5.934	4369	4369	62.8586	MS2	8/18
	nLLLETITEmNDEVKERFK	1	1	CID	N1(Deamidated) M10(Oxidation)	4.10523	0.744788	0.327823	3	3	2339.16	-22.8837	2693	2693	47.5742	MS2	13/72
	EQEEQKTSYQAqQSqLFDR	1	1	CID	Q12(Deamidated) Q15(Deamidated)	2.12254	0.542758	0	1	2	2345.07	22.1355	3402	3402	54.2658	MS2	4/36
	EQEEQKTSYQAqqSQLFDR	1	1	CID	Q12(Deamidated) Q13(Deamidated)	2.12254	0.525153	0.0324361	3	2	2345.07	22.1355	3402	3402	54.2658	MS2	4/36
gi307127197	4.25	5	424	0	hypothetical protein SP670_1065 [Streptococcus pneumoniae 670-6B]
	Sequence	# Proteins	# Protein Groups	Activation Type	Modifications	Probability	XCorr	Δ Score	Rank	Charge	MH+ [Da]	ΔM [ppm]	First Scan	Last Scan	RT [min]	MSOrder	Ions Matched	Annotation
	DQEIAQLqSqIqNFDTEK	1	1	CID	Q8(Deamidated) Q10(Deamidated) Q12(Deamidated)	3.53806	1.18811	0.672804	2	3	2137.96	-13.47	5374	5374	72.4711	MS2	15/68
	DQEIAQLqSQIqnFDTEK	1	1	CID	Q8(Deamidated) Q12(Deamidated) N13(Deamidated)	3.53806	1.16751	0.678478	3	3	2137.96	-13.47	5374	5374	72.4711	MS2	13/68
	DQEIAQLQSqIqnFDTEK	1	1	CID	Q10(Deamidated) Q12(Deamidated) N13(Deamidated)	3.53806	1.14413	0.684915	5	3	2137.96	-13.47	5374	5374	72.4711	MS2	14/68
	DQEIAQLqSqIQnFDTEK	1	1	CID	Q8(Deamidated) Q10(Deamidated) N13(Deamidated)	3.53806	1.08511	0.70117	6	3	2137.96	-13.47	5374	5374	72.4711	MS2	14/68
	DqEIAqLqSQIQNFDTEK	1	1	CID	Q2(Deamidated) Q6(Deamidated) Q8(Deamidated)	4.44961	0.940026	0.773674	2	2	2137.96	-16.9966	5366	5366	72.3967	MS2	9/34
gi307127240	6.83	3	322	0	pyruvate dehydrogenase E1 component subunit alpha [Streptococcus pneumoniae 670-6B]
	Sequence	# Proteins	# Protein Groups	Activation Type	Modifications	Probability	XCorr	Δ Score	Rank	Charge	MH+ [Da]	ΔM [ppm]	First Scan	Last Scan	RT [min]	MSOrder	Ions Matched	Annotation
	GHGqAIAKGIDLNGmmAEILGK	1	1	CID	Q4(Deamidated) M15(Oxidation) M16(Oxidation)	5.23171	1.60846	0.638922	2	3	2257.13	-5.03623	4843	4843	67.1799	MS2	18/84
	GHGQAIAKGIDLnGmmAEILGK	1	1	CID	N13(Deamidated) M15(Oxidation) M16(Oxidation)	12.1847	1.35207	0.696477	4	3	2257.13	-5.03623	4843	4843	67.1799	MS2	17/84
	GHGqAIAKGIDLNGmmAEILGK	1	1	CID	Q4(Deamidated) M15(Oxidation) M16(Oxidation)	3.70148	1.07319	0.753176	3	2	2257.13	-4.65658	4814	4814	66.9014	MS2	7/42
gi307127241	4.55	1	330	0	pyruvate dehydrogenase E1 component subunit beta [Streptococcus pneumoniae 670-6B]
	Sequence	# Proteins	# Protein Groups	Activation Type	Modifications	Probability	XCorr	Δ Score	Rank	Charge	MH+ [Da]	ΔM [ppm]	First Scan	Last Scan	RT [min]	MSOrder	Ions Matched	Annotation
	SSIRDNNPVIILEYK	1	1	CID		9.55875	0.910942	0	1	2	1760.97	14.8504	5063	5063	69.3894	MS2	6/28
gi307127254	7.42	3	391	0	Abi-alpha protein [Streptococcus pneumoniae 670-6B]
	Sequence	# Proteins	# Protein Groups	Activation Type	Modifications	Probability	XCorr	Δ Score	Rank	Charge	MH+ [Da]	ΔM [ppm]	First Scan	Last Scan	RT [min]	MSOrder	Ions Matched	Annotation
	LFQKFNHTDLNIKEqYFHVLK	1	1	CID	Q15(Deamidated)	3.19369	1.02507	0	1	2	2663.4	6.71546	4606	4606	65.002	MS2	4/40
	LFQKFNHTDLnIKEQYFHVLK	1	1	CID	N11(Deamidated)	3.19369	1.00481	0.0197626	2	2	2663.4	6.71546	4606	4606	65.002	MS2	4/40
	nGSINTPK	1	1	CID	N1(Deamidated)	1.77127	0.557028	0	1	1	831.425	4.40257	1835	1835	37.7059	MS2	4/14
gi307127283	8.59	1	361	0	integrase [Streptococcus pneumoniae 670-6B]
	Sequence	# Proteins	# Protein Groups	Activation Type	Modifications	Probability	XCorr	Δ Score	Rank	Charge	MH+ [Da]	ΔM [ppm]	First Scan	Last Scan	RT [min]	MSOrder	Ions Matched	Annotation
	ALQYIMGHANIAMTLNYYAHATFDSAMAEMK	1	1	CID		2.41083	1.71528	0.378634	4	3	3477.58	-34.3246	4017	4017	59.7333	MS2	16/120
gi307127290	6.23	1	305	0	conjugative transposon protein [Streptococcus pneumoniae 670-6B]
	Sequence	# Proteins	# Protein Groups	Activation Type	Modifications	Probability	XCorr	Δ Score	Rank	Charge	MH+ [Da]	ΔM [ppm]	First Scan	Last Scan	RT [min]	MSOrder	Ions Matched	Annotation
	ATqVSqFDLVLEKnGSnWK	1	1	CID	Q3(Deamidated) Q6(Deamidated) N14(Deamidated) N17(Deamidated)	3.58359	1.83572	0	1	4	2168.05	11.4587	4726	4726	66.1043	MS2	17/108
gi307127309	1.64	3	2074	0	SNF2 family protein [Streptococcus pneumoniae 670-6B]
	Sequence	# Proteins	# Protein Groups	Activation Type	Modifications	Probability	XCorr	Δ Score	Rank	Charge	MH+ [Da]	ΔM [ppm]	First Scan	Last Scan	RT [min]	MSOrder	Ions Matched	Annotation
	AKEqHLQELFQEFVSR	1	1	CID	Q4(Deamidated)	3.15816	0.826308	0.052397	2	2	1990	-3.14384	2711	2711	47.7488	MS2	4/30
	NVDmEmKVRQIqEEHDFK	1	1	CID	M4(Oxidation) M6(Oxidation) Q12(Deamidated)	3.36559	0.743913	0.279986	3	3	2309.05	-4.30467	4894	4894	67.6758	MS2	9/68
	AKEQHLqELFQEFVSR	1	1	CID	Q7(Deamidated)	3.15816	0.574248	0.341457	4	2	1990	-3.14384	2711	2711	47.7488	MS2	3/30
gi307127314	2.35	2	937	0	hypothetical protein SP670_1182 [Streptococcus pneumoniae 670-6B]
	Sequence	# Proteins	# Protein Groups	Activation Type	Modifications	Probability	XCorr	Δ Score	Rank	Charge	MH+ [Da]	ΔM [ppm]	First Scan	Last Scan	RT [min]	MSOrder	Ions Matched	Annotation
	TnDKGITYYTKVDDVMGYMNFK	1	1	CID	N2(Deamidated)	6.73094	0.555501	0.0168464	2	2	2604.18	-20.5005	3355	3355	53.8464	MS2	7/42
	TNDKGITYYTKVDDVMGYMnFK	1	1	CID	N20(Deamidated)	2.04981	0.414205	0.266918	3	2	2604.18	-20.5005	3355	3355	53.8464	MS2	5/42
gi307127322	5.04	1	278	0	abortive infection protein AbiGII [Streptococcus pneumoniae 670-6B]
	Sequence	# Proteins	# Protein Groups	Activation Type	Modifications	Probability	XCorr	Δ Score	Rank	Charge	MH+ [Da]	ΔM [ppm]	First Scan	Last Scan	RT [min]	MSOrder	Ions Matched	Annotation
	ENLIDIFEEILCSK	1	1	CID		8.46557	0.63296	0	1	2	1665.85	8.07704	3212	3212	52.5705	MS2	4/26
gi307127334	2.55	4	1963	0	immunoglobulin A1 protease [Streptococcus pneumoniae 670-6B]
	Sequence	# Proteins	# Protein Groups	Activation Type	Modifications	Probability	XCorr	Δ Score	Rank	Charge	MH+ [Da]	ΔM [ppm]	First Scan	Last Scan	RT [min]	MSOrder	Ions Matched	Annotation
	nVAISGKNDIGSLANEATNGTK	3	2	CID	N1(Deamidated)	7.40872	0.762882	0.577297	3	2	2175.07	-15.1092	5451	5451	73.1704	MS2	5/42
	NVAISGKnDIGSLANEATNGTK	3	2	CID	N8(Deamidated)	2.02853	0.737794	0.591198	4	2	2175.07	-15.1092	5451	5451	73.1704	MS2	6/42
	GTFTGqLIGEKDGK	1	1	CID	Q6(Deamidated)	3.40424	0.704598	0.202224	2	3	1451.74	0.862761	664	664	18.2971	MS2	11/52
	YVDNFTFYLDKKAK	4	3	CID		2.21717	0.517363	0	1	2	1751.89	-12.9746	2113	2113	41.1756	MS2	6/26
gi307127355	0.79	1	633	0	ABC transporter [Streptococcus pneumoniae 670-6B]
	Sequence	# Proteins	# Protein Groups	Activation Type	Modifications	Probability	XCorr	Δ Score	Rank	Charge	MH+ [Da]	ΔM [ppm]	First Scan	Last Scan	RT [min]	MSOrder	Ions Matched	Annotation
	RAqSR	1	1	CID	Q3(Deamidated)	4.05678	0.650456	0	1	1	618.333	1.24156	1104	1104	26.6101	MS2	5/8
gi307127407	4.55	1	484	0	neopullulanase [Streptococcus pneumoniae 670-6B]
	Sequence	# Proteins	# Protein Groups	Activation Type	Modifications	Probability	XCorr	Δ Score	Rank	Charge	MH+ [Da]	ΔM [ppm]	First Scan	Last Scan	RT [min]	MSOrder	Ions Matched	Annotation
	CMPWERVSSDNDMLnFmKRLIK	1	1	CID	N15(Deamidated) M17(Oxidation)	2.44287	1.32703	0.709353	4	3	2730.26	-25.9377	4106	4106	60.5277	MS2	10/84
gi307127549	9.31	1	290	0	hypothetical protein SP670_1422 [Streptococcus pneumoniae 670-6B]
	Sequence	# Proteins	# Protein Groups	Activation Type	Modifications	Probability	XCorr	Δ Score	Rank	Charge	MH+ [Da]	ΔM [ppm]	First Scan	Last Scan	RT [min]	MSOrder	Ions Matched	Annotation
	GDFVGTNCRINSYCLLKNSVTIPKLEK	1	1	CID		7.73207	2.29584	0.0576397	2	4	3012.59	26.0676	4309	4309	62.3388	MS2	26/156
gi307127568	5.45	2	404	0	thiamine biosynthesis/tRNA modification protein ThiI [Streptococcus pneumoniae 670-6B]
	Sequence	# Proteins	# Protein Groups	Activation Type	Modifications	Probability	XCorr	Δ Score	Rank	Charge	MH+ [Da]	ΔM [ppm]	First Scan	Last Scan	RT [min]	MSOrder	Ions Matched	Annotation
	ELNQTLGRAVFEAIPnVQAQMK	1	1	CID	N16(Deamidated)	2.41783	0.857294	0	1	2	2458.27	-8.12744	4644	4644	65.3391	MS2	8/42
	ELNQTLGRAVFEAIPNVqAQMK	1	1	CID	Q18(Deamidated)	2.41783	0.717302	0.163295	2	2	2458.27	-8.12744	4644	4644	65.3391	MS2	8/42
gi307127614	4.6	1	174	0	topology modulation protein [Streptococcus pneumoniae 670-6B]
	Sequence	# Proteins	# Protein Groups	Activation Type	Modifications	Probability	XCorr	Δ Score	Rank	Charge	MH+ [Da]	ΔM [ppm]	First Scan	Last Scan	RT [min]	MSOrder	Ions Matched	Annotation
	VTILRnqR	1	1	CID	N6(Deamidated) Q7(Deamidated)	2.07029	0.511079	0	1	1	1001.57	-4.40528	1855	1855	37.9743	MS2	3/14
gi307127728	1.26	1	1032	0	SWF/SNF family ATP-dependent RNA helicase [Streptococcus pneumoniae 670-6B]
	Sequence	# Proteins	# Protein Groups	Activation Type	Modifications	Probability	XCorr	Δ Score	Rank	Charge	MH+ [Da]	ΔM [ppm]	First Scan	Last Scan	RT [min]	MSOrder	Ions Matched	Annotation
	EIKALPVGqqGKK	1	1	CID	Q9(Deamidated) Q10(Deamidated)	5.70859	0.429878	0	1	2	1397.81	10.417	2442	2442	44.9036	MS2	7/24
gi307127729	4.38	1	388	0	putative aminotransferase B [Streptococcus pneumoniae 670-6B]
	Sequence	# Proteins	# Protein Groups	Activation Type	Modifications	Probability	XCorr	Δ Score	Rank	Charge	MH+ [Da]	ΔM [ppm]	First Scan	Last Scan	RT [min]	MSOrder	Ions Matched	Annotation
	EGEAVLInTPVYPPFAR	1	1	CID	N8(Deamidated)	2.40614	0.784902	0.274991	5	2	1873.97	-3.04904	4455	4455	63.6363	MS2	6/32
gi307127730	4.4	2	364	0	cystathionine gamma-synthase [Streptococcus pneumoniae 670-6B]
	Sequence	# Proteins	# Protein Groups	Activation Type	Modifications	Probability	XCorr	Δ Score	Rank	Charge	MH+ [Da]	ΔM [ppm]	First Scan	Last Scan	RT [min]	MSOrder	Ions Matched	Annotation
	MERSTANAqEVVAFLK	1	1	CID	Q9(Deamidated)	2.88025	1.58173	0.553477	2	2	1794.9	-4.50872	4841	4841	67.1615	MS2	11/30
	MERSTAnAQEVVAFLK	1	1	CID	N7(Deamidated)	2.88025	1.52937	0.568257	3	2	1794.9	-4.50872	4841	4841	67.1615	MS2	11/30
gi307127770	5.49	1	419	0	phosphoglucosamine mutase [Streptococcus pneumoniae 670-6B]
	Sequence	# Proteins	# Protein Groups	Activation Type	Modifications	Probability	XCorr	Δ Score	Rank	Charge	MH+ [Da]	ΔM [ppm]	First Scan	Last Scan	RT [min]	MSOrder	Ions Matched	Annotation
	VMAEAPTTEEVDYYVDTITDVVR	1	1	CID		3.15465	1.71227	0	2	5	2616.25	11.478	5089	5089	69.652	MS2	30/176
gi307127783	9.39	2	490	0	lysozyme [Streptococcus pneumoniae 670-6B]
	Sequence	# Proteins	# Protein Groups	Activation Type	Modifications	Probability	XCorr	Δ Score	Rank	Charge	MH+ [Da]	ΔM [ppm]	First Scan	Last Scan	RT [min]	MSOrder	Ions Matched	Annotation
	IINKYMDTmKqAGYqnVYVYSYR	1	1	CID	M9(Oxidation) Q11(Deamidated) Q15(Deamidated) N16(Deamidated)	3.2695	1.64366	0.172757	3	4	2867.33	5.21559	2127	2127	41.3385	MS2	16/132
	AWFYInSDGRYSqnEWHGNYYLK	1	1	CID	N6(Deamidated) Q13(Deamidated) N14(Deamidated)	2.74059	0.565274	0.669397	5	4	2914.29	18.4581	2368	2368	44.1011	MS2	14/132
gi307127786	8.28	1	314	0	homoserine O-succinyltransferase [Streptococcus pneumoniae 670-6B]
	Sequence	# Proteins	# Protein Groups	Activation Type	Modifications	Probability	XCorr	Δ Score	Rank	Charge	MH+ [Da]	ΔM [ppm]	First Scan	Last Scan	RT [min]	MSOrder	Ions Matched	Annotation
	EEVLnKTnLEILSEGPqVGVSILASR	1	1	CID	N5(Deamidated) N8(Deamidated) Q17(Deamidated)	7.71823	0.887014	0.405893	2	3	2798.47	4.79765	3029	3029	50.8138	MS2	10/100
gi307127794	2.1	1	524	0	cold-shock DEAD box protein A [Streptococcus pneumoniae 670-6B]
	Sequence	# Proteins	# Protein Groups	Activation Type	Modifications	Probability	XCorr	Δ Score	Rank	Charge	MH+ [Da]	ΔM [ppm]	First Scan	Last Scan	RT [min]	MSOrder	Ions Matched	Annotation
	VDELTRGLKIR	1	1	CID		7.05763	0.469612	0	1	2	1299.78	9.72392	2424	2424	44.6849	MS2	4/20
gi307127799	10	2	360	0	Xaa-Pro dipeptidase [Streptococcus pneumoniae 670-6B]
	Sequence	# Proteins	# Protein Groups	Activation Type	Modifications	Probability	XCorr	Δ Score	Rank	Charge	MH+ [Da]	ΔM [ppm]	First Scan	Last Scan	RT [min]	MSOrder	Ions Matched	Annotation
	LDVAVVSDPVTINYLTGFYSDPHER	1	1	CID		44.3031	1.97861	0	1	3	2807.39	2.57924	4113	4113	60.5877	MS2	20/96
	IKHALPQLDFK	1	1	CID		2.69456	0.583106	0	1	3	1309.76	-5.6881	2337	2337	43.7816	MS2	6/40
gi307127832	1.8	1	778	0	P-type ATPase - metal cation transport [Streptococcus pneumoniae 670-6B]
	Sequence	# Proteins	# Protein Groups	Activation Type	Modifications	Probability	XCorr	Δ Score	Rank	Charge	MH+ [Da]	ΔM [ppm]	First Scan	Last Scan	RT [min]	MSOrder	Ions Matched	Annotation
	VSPHqKKLIIqTLK	1	1	CID	Q5(Deamidated) Q11(Deamidated)	4.76808	0.770241	0	1	3	1634.97	-15.3712	3121	3121	51.6595	MS2	7/52
gi307127856	6.62	3	740	0	GTP pyrophosphokinase [Streptococcus pneumoniae 670-6B]
	Sequence	# Proteins	# Protein Groups	Activation Type	Modifications	Probability	XCorr	Δ Score	Rank	Charge	MH+ [Da]	ΔM [ppm]	First Scan	Last Scan	RT [min]	MSOrder	Ions Matched	Annotation
	AEAEELVKGGEVKVEnKETLK	1	1	CID	N16(Deamidated)	4.86159	1.01322	0.707007	5	4	2301.21	-7.69116	4091	4091	60.4001	MS2	19/120
	LHNMRTLKHLRK	1	1	CID		2.35278	0.681923	0	1	3	1546.91	3.3626	2788	2788	48.4738	MS2	7/44
	EMLmAqFQENGYVANK	1	1	CID	M4(Oxidation) Q6(Deamidated)	4.36636	0.622643	0.407234	8	2	1889.84	-0.64474	4228	4228	61.6097	MS2	4/30
gi307127866	7.83	1	230	0	2,3-bisphosphoglycerate-dependent phosphoglycerate mutase [Streptococcus pneumoniae 670-6B]
	Sequence	# Proteins	# Protein Groups	Activation Type	Modifications	Probability	XCorr	Δ Score	Rank	Charge	MH+ [Da]	ΔM [ppm]	First Scan	Last Scan	RT [min]	MSOrder	Ions Matched	Annotation
	TTNLALEASDQLWVPVEK	1	1	CID		19.5033	1.56449	0	1	2	2014.05	-0.487647	3036	3036	50.8851	MS2	8/34

## Sheet: 5335-5 (2)
Accession #	Coverage	# Peptides	#AAs	Score	Description
gi225857997	29.94	71	638	105.155	surface protein PspA [Streptococcus pneumoniae 70585]
	Sequence	# Proteins	# Protein Groups	Activation Type	Modifications	Probability	XCorr	Δ Score	Rank	Charge	MH+ [Da]	ΔM [ppm]	First Scan	Last Scan	RT [min]	MSOrder	Ions Matched	Annotation
	LSKLEELSDKIDELDAEIAK	3	3	CID		154.775	5.39946	0	1	3	2259.2	0.639513	4559	4559	74.8752	MS2	35/76
	LEELSDKIDELDAEIAK	3	3	CID		90.442	4.6889	0	1	3	1930.99	1.19926	3907	3907	67.5597	MS2	33/64
	NSDGEYSALYLEAAEK	1	1	CID		101.783	4.26847	0	1	2	1759.8	-0.600029	3126	3126	59.2757	MS2	23/30
	LEELSDKIDELDAEIAKLEK	1	1	CID		124.418	4.25904	0	1	3	2301.21	0.506524	4798	4798	77.5811	MS2	35/76
	NSDGEYSALYLEAAEK	1	1	CID		110.39	4.25525	0	1	2	1759.8	1.10896	6013	6013	95.1024	MS2	21/30
	NSDGEYSALYLEAAEK	1	1	CID		105.094	3.99788	0	1	2	1759.8	0.254463	2839	2839	56.2316	MS2	22/30
	NSDGEYSALYLEAAEK	1	1	CID		92.3378	3.76158	0	1	2	1759.8	0.0103222	5812	5812	92.0909	MS2	18/30
	NSDGEYSALYLEAAEK	1	1	CID		100.59	3.67295	0	1	2	1759.8	-0.96624	3408	3408	62.3064	MS2	16/30
	LEELSDKIDELDAEIAK	3	3	CID		64.8693	3.45515	0	1	2	1930.99	-0.374209	3844	3844	66.8796	MS2	18/32
	NSDGEYSALYLEAAEK	1	1	CID		99.0165	3.43807	0	1	2	1759.8	-0.600029	6181	6181	98.1397	MS2	17/30
	LKEIDESDSEDYVK	1	1	CID		111.998	3.40905	0	1	2	1669.78	-0.416475	1313	1313	39.6008	MS2	21/26
	LEELSDKIDELDAEIAK	3	3	CID		89.9264	3.34579	0	1	2	1930.98	-2.08319	4121	4121	69.9378	MS2	14/32
	LEELSDKIDELDAEIAK	3	3	CID		59.3407	3.133	0	1	3	1930.99	1.01615	4173	4173	70.5867	MS2	23/64
	LKEIDESDSEDYVKEGLR	1	1	CID		74.6112	2.80238	0	1	3	2125.03	-0.422343	1959	1959	46.6858	MS2	24/68
	NSDGEYSALYLEAAEK	1	1	CID		83.4157	2.7726	0	1	2	1759.8	-3.52972	4251	4251	71.3925	MS2	13/30
	LKEIDESDSEDYVK	1	1	CID		27.7345	2.69979	0	1	3	1669.78	-0.429921	1471	1471	41.3572	MS2	20/52
	DVEDFKNSDGEYSALYLEAAEK	1	1	CID		66.1136	2.6753	0	1	2	2493.13	-3.22644	3110	3110	59.1219	MS2	13/42
	NSDGEYSALYLEAAEK	1	1	CID		129.034	2.65144	0	1	2	1759.8	-0.233818	5625	5625	89.0693	MS2	14/30
	LKEIDESDSEDYVKEGLRAPLQSELDAK	1	1	CID		19.7941	2.63272	0	1	4	3177.58	0.309601	3098	3098	59.0063	MS2	30/162
	NSDGEYSALYLEAAEK	1	1	CID		78.8344	2.58477	0	1	2	1759.8	-0.355889	2558	2558	53.2227	MS2	15/30
	LEELSDKIDELDAEIAKLEK	1	1	CID		73.3185	2.57616	0	1	4	2301.21	2.07999	4864	4864	78.3655	MS2	36/114
	LEELSDKIDELDAEIAK	3	3	CID		47.2505	2.5053	0	1	3	1930.98	-1.54732	3626	3626	64.5524	MS2	22/64
	NSDGEYSALYLEAAEK	1	1	CID		100.416	2.39666	0	1	2	1759.8	0.0103222	3983	3983	68.3613	MS2	14/30
	LEELSDKIDELDAEIAK	3	3	CID		44.7313	2.37629	0	1	3	1930.98	-1.18111	6217	6217	98.7622	MS2	22/64
	LKEIDESDSEDYVKEGLR	1	1	CID		49.5727	2.37421	0	1	2	2125.03	-0.0426856	1979	1979	46.8931	MS2	15/34
	NSDGEYSALYLEAAEK	1	1	CID		13.303	2.27376	0	1	2	1759.8	1.47517	4730	4730	76.8135	MS2	17/30
	NSDGEYSALYLEAAEK	1	1	CID		106.623	2.27314	0	1	2	1759.8	-0.355889	3698	3698	65.3342	MS2	15/30
	NSDGEYSALYLEAAEK	1	1	CID		81.3454	2.24155	0	1	2	1759.8	-0.477959	6295	6295	101.178	MS2	16/30
	IDELDAEIAK	5	4	CID		59.0938	2.22225	0	1	2	1116.58	-0.0666309	1735	1735	44.1708	MS2	16/18
	LKEIDESDSEDYVKEGLR	1	1	CID		6.69961	2.18623	0	1	4	2125.03	0.784914	2070	2070	47.8824	MS2	29/102
	LEELSDKIDELDAEIAK	3	3	CID		4.72481	2.15235	0	1	2	1930.99	-0.252139	6037	6037	95.5441	MS2	10/32
	IAELENEVHR	1	1	CID		23.4785	2.10857	0	1	2	1209.62	-0.0413184	968	968	35.7121	MS2	11/18
	LKEIDESDSEDYVK	1	1	CID		63.8487	2.0875	0	1	2	1669.78	0.315947	1594	1594	42.6641	MS2	15/26
	LEKDVEDFKNSDGEYSALYLEAAEKDLAAK	1	1	CID		49.6484	2.0621	0	1	3	3361.64	3.86229	3837	3837	66.8055	MS2	24/116
	LSKLEELSDKIDELDAEIAK	3	3	CID		17.0895	2.02693	0	1	3	2259.2	1.92125	4969	4969	79.6796	MS2	16/76
	LEELSDKIDELDAEIAK	3	3	CID		4.01045	1.93908	0	1	3	1930.99	0.283731	4449	4449	73.6124	MS2	17/64
	LEELSDKIDELDAEIAKLEK	1	1	CID		33.8516	1.83636	0	1	2	2301.21	0.764111	4816	4816	77.7894	MS2	10/38
	EKVIPSAEELTETR	1	1	CID		4.08399	1.73864	0	1	2	1601.84	-0.111006	1885	1885	45.8567	MS2	7/26
	AEKPAPAPQPEQPAPAPK	1	1	CID		63.9656	1.71307	0	1	3	1823.97	1.69973	501	501	28.0845	MS2	24/68
	LKEIDESDSEDYVK	1	1	CID		10.2239	1.69056	0	1	3	1669.78	-0.796132	6170	6170	97.9227	MS2	16/52
	DVEDFKNSDGEYSALYLEAAEK	1	1	CID		32.5473	1.66814	0	1	3	2493.13	0.422227	3114	3114	59.1609	MS2	25/84
	DVEDFKNSDGEYSALYLEAAEK	1	1	CID		14.2594	1.51608	0	1	3	2493.12	-5.62025	3393	3393	62.1868	MS2	11/84
	IAELENEVHRLETK	1	1	CID		26.9477	1.49204	0	1	2	1680.89	-0.806631	2369	2369	51.0976	MS2	11/26
	LTQQQPPKAEKPAPAPQPEQPAPAPK	1	1	CID		2.62342	1.44791	0	1	4	2744.47	1.62085	690	690	31.9094	MS2	30/150
	IDELDAEIAK	5	4	CID		12.486	1.42649	0	1	2	1116.58	-0.188701	2090	2090	48.1054	MS2	13/18
	IAELENEVHR	1	1	CID		25.0933	1.29311	0	2	3	1209.62	0.525069	1399	1399	40.5886	MS2	16/36
	AKEVALQAKIAELENEVHRLETK	1	1	CID		3.51761	1.23288	0	1	5	2619.45	1.49504	4437	4437	73.4612	MS2	37/176
	NSDGEYSALYLEAAEK	1	1	CID		33.636	1.21505	0	1	2	1759.8	1.47517	4983	4983	79.8613	MS2	9/30
	IAELENEVHR	1	1	CID		25.6563	1.06348	0.0018536	3	3	1209.62	0.708175	1124	1124	37.5797	MS2	13/36
	TDDQQAEEDYAR	5	4	CID		25.123	1.04664	0	1	2	1440.59	1.01521	503	503	28.138	MS2	7/22
	DVEDFKNSDGEYSALYLEAAEK	1	1	CID		19.6616	0.958592	0	1	3	2493.14	10.8592	6156	6156	97.6751	MS2	14/84
	KASQEqQKAnLDYqqK	1	1	CID	Q6(Deamidated) N10(Deamidated) Q14(Deamidated) Q15(Deamidated)	4.90077	0.866691	0	1	2	1910.88	-14.9952	1221	1221	38.6099	MS2	5/30
	EGLRAPLQSELDAK	3	2	CID		19.6547	0.856661	0	1	3	1526.82	0.584981	1987	1987	46.9862	MS2	15/52
	NSDGEYSALYLEAAEKDLAAK	1	1	CID		4.88334	0.802628	0.0964959	3	3	2258.08	-2.52316	3667	3667	64.9913	MS2	10/80
	KASQEQqKAnLDYqqK	1	1	CID	Q7(Deamidated) N10(Deamidated) Q14(Deamidated) Q15(Deamidated)	4.90077	0.76818	0.113663	2	2	1910.88	-14.9952	1221	1221	38.6099	MS2	4/30
	AEKPAPAPqPEQPAPAPK	1	1	CID	Q9(Deamidated)	6.71725	0.75457	0	1	2	1824.93	-18.1915	1832	1832	45.2227	MS2	8/34
	NSDGEYSALYLEAAEK	1	1	CID		31.4728	0.749865	0	1	2	1759.8	-0.600029	6372	6372	104.228	MS2	10/30
	EGLRAPLQSELDAK	3	2	CID		11.0527	0.621558	0	1	3	1526.82	0.0356648	2270	2270	50.0158	MS2	12/52
	AEKPAPAPQPEqPAPAPK	1	1	CID	Q12(Deamidated)	6.71725	0.617424	0.181753	2	2	1824.93	-18.1915	1832	1832	45.2227	MS2	7/34
	LEELSDKIDELDAEIAKLEK	1	1	CID		3.86084	0.615629	0	1	4	2301.21	2.56827	5105	5105	81.3844	MS2	24/114
	IAELENEVHRLETK	1	1	CID		16.1438	0.608636	0	1	3	1680.89	-0.453866	2343	2343	50.7879	MS2	10/52
	KASQEqqKAnLDYQqK	1	1	CID	Q6(Deamidated) Q7(Deamidated) N10(Deamidated) Q15(Deamidated)	12.0741	0.590644	0.318507	3	2	1910.88	-14.9952	1221	1221	38.6099	MS2	5/30
	KASQEqqKANLDYqqK	1	1	CID	Q6(Deamidated) Q7(Deamidated) Q14(Deamidated) Q15(Deamidated)	12.0741	0.577124	0.334106	4	2	1910.88	-14.9952	1221	1221	38.6099	MS2	5/30
	SEEEYnRLTqqqPPK	3	3	CID	N6(Deamidated) Q10(Deamidated) Q11(Deamidated) Q12(Deamidated)	2.86573	0.572799	0.634908	4	3	1850.84	11.1998	1602	1602	42.7415	MS2	8/56
	EIDESDSEDYVK	1	1	CID		19.5051	0.560735	0	1	2	1428.6	-1.06397	897	897	34.8345	MS2	7/22
	KASQEqqKAnLDYqQK	1	1	CID	Q6(Deamidated) Q7(Deamidated) N10(Deamidated) Q14(Deamidated)	12.0741	0.559383	0.354576	5	2	1910.88	-14.9952	1221	1221	38.6099	MS2	5/30
	NSDGEYSALYLEAAEK	1	1	CID		28.4403	0.546232	0.241015	3	2	1759.8	-0.233818	6442	6442	107.288	MS2	9/30
	NSDGEYSALYLEAAEK	1	1	CID		8.15182	0.518045	0	1	2	1759.81	3.42829	5432	5432	86.0469	MS2	5/30
	IDELDAEIAK	5	4	CID		8.29	0.474321	0	1	2	1116.58	-2.50804	6097	6097	96.5926	MS2	5/18
	DGDTWYYLEASGAmK	8	7	CID	M14(Oxidation)	3.59506	0.464857	0	1	2	1722.73	0.701103	2835	2835	56.1928	MS2	5/28
	TDDQQAEEDYAR	5	4	CID		15.3308	0.406585	0	1	2	1440.59	-0.205498	437	437	25.132	MS2	4/22
gi182683460	32.62	42	607	70.6244	molecular chaperone DnaK [Streptococcus pneumoniae CGSP14]
	Sequence	# Proteins	# Protein Groups	Activation Type	Modifications	Probability	XCorr	Δ Score	Rank	Charge	MH+ [Da]	ΔM [ppm]	First Scan	Last Scan	RT [min]	MSOrder	Ions Matched	Annotation
	LYEQAAAAQQAQEGAEGAQATGNAGDDVVDGEFTEK	5	1	CID		118.538	5.22929	0	1	3	3639.63	1.95295	2668	2668	54.3551	MS2	38/140
	SVNPDEVVAmGAAIQGGVITGDVK	5	1	CID	M10(Oxidation)	95.8637	4.45746	0	1	3	2343.19	1.09371	3282	3282	60.9335	MS2	33/92
	LYEQAAAAQQAQEGAEGAQATGNAGDDVVDGEFTEK	5	1	CID		59.8747	4.41588	0	1	3	3639.63	-0.976737	6216	6216	98.7562	MS2	32/140
	LYEQAAAAQQAQEGAEGAQATGNAGDDVVDGEFTEK	5	1	CID		55.7035	3.64298	0	1	3	3639.63	1.22053	3251	3251	60.6237	MS2	31/140
	LYEQAAAAQQAQEGAEGAQATGNAGDDVVDGEFTEK	5	1	CID		10.8034	3.3465	0	1	3	3639.64	4.88264	5773	5773	91.4511	MS2	28/140
	LYEQAAAAQQAQEGAEGAQATGNAGDDVVDGEFTEK	5	1	CID		76.4239	3.33488	0	1	3	3639.63	1.22053	2952	2952	57.4261	MS2	26/140
	LYEQAAAAQQAQEGAEGAQATGNAGDDVVDGEFTEK	5	1	CID		13.8481	3.2463	0	1	4	3639.63	1.51226	2452	2452	52.0744	MS2	39/210
	SVNPDEVVAmGAAIQGGVITGDVK	5	1	CID	M10(Oxidation)	111.519	3.06544	0	1	2	2343.19	1.10716	3459	3459	62.8637	MS2	21/46
	SVNPDEVVAmGAAIQGGVITGDVK	5	1	CID	M10(Oxidation)	93.1228	3.007	0	1	2	2343.19	-0.113545	6043	6043	95.6143	MS2	20/46
	LYEQAAAAQQAQEGAEGAQATGNAGDDVVDGEFTEK	5	1	CID		48.2864	2.78824	0	1	3	3639.64	3.41779	4958	4958	79.533	MS2	21/140
	NEVDQAIFATEK	5	1	CID		68.069	2.70718	0	1	2	1364.67	0.546103	2126	2126	48.5196	MS2	16/22
	EQTIVIQSNSGLTDEEIDR	5	1	CID		60.0703	2.70198	0	1	2	2147.05	0.0930175	2523	2523	52.8617	MS2	15/36
	LYEQAAAAQQAQEGAEGAQATGNAGDDVVDGEFTEK	5	1	CID		8.02753	2.66457	0	1	3	3639.64	3.41779	6053	6053	95.7342	MS2	21/140
	SQVFSTAADNQPAVDIHVLQGERPmAADNK	5	1	CID	M25(Oxidation)	64.0768	2.56389	0	1	4	3225.56	3.8989	2844	2844	56.2752	MS2	33/174
	SQVFSTAADNQPAVDIHVLQGERPmAADNK	5	1	CID	M25(Oxidation)	49.4389	2.47956	0	1	3	3225.56	0.799552	2863	2863	56.5076	MS2	23/116
	LYEQAAAAQQAQEGAEGAQATGNAGDDVVDGEFTEK	5	1	CID		31.2488	2.47735	0	1	3	3639.63	1.22053	3621	3621	64.5071	MS2	26/140
	LYEQAAAAQQAQEGAEGAQATGNAGDDVVDGEFTEK	5	1	CID		47.6657	2.32947	0	1	3	3639.63	1.95295	6313	6313	101.774	MS2	31/140
	QALSDAGLSLSEIDEVILVGGSTR	5	1	CID		53.1623	2.22427	0	1	2	2430.27	2.11036	5139	5139	81.7533	MS2	16/46
	LYEQAAAAQQAQEGAEGAQATGNAGDDVVDGEFTEK	5	1	CID		16.2349	2.17799	0	1	3	3639.63	-0.610527	4393	4393	72.9251	MS2	24/140
	SVNPDEVVAmGAAIQGGVITGDVK	5	1	CID	M10(Oxidation)	42.7854	2.17287	0	1	2	2343.19	-0.601826	3746	3746	65.8789	MS2	13/46
	LYEQAAAAQQAQEGAEGAQATGNAGDDVVDGEFTEK	5	1	CID		13.9069	2.1381	0	1	3	3639.63	-0.244316	2390	2390	51.3424	MS2	25/140
	LYEQAAAAQQAQEGAEGAQATGNAGDDVVDGEFTEK	5	1	CID		3.56868	2.02968	0	1	3	3639.64	4.51643	3915	3915	67.6552	MS2	19/140
	EQTIVIQSNSGLTDEEIDR	5	1	CID		5.7455	2.00254	0	1	2	2147.04	-7.71948	6047	6047	95.6541	MS2	11/36
	DAAQAALDDLKK	5	1	CID		53.0992	1.90184	0	1	3	1258.67	1.3945	1909	1909	46.1459	MS2	25/44
	LYEQAAAAQQAQEGAEGAQATGNAGDDVVDGEFTEK	5	1	CID		17.8529	1.85058	0	1	3	3639.63	-0.610527	4653	4653	75.9261	MS2	22/140
	SVNPDEVVAmGAAIQGGVITGDVK	5	1	CID	M10(Oxidation)	29.6015	1.78986	0	1	2	2343.19	7.21067	5847	5847	92.5845	MS2	12/46
	DAAQAALDDLKK	5	1	CID		38.5632	1.63119	0	1	2	1258.66	0.0346581	2116	2116	48.3875	MS2	12/22
	EQTIVIQSNSGLTDEEIDR	5	1	CID		6.93833	1.44162	0	1	2	2147.04	-3.81323	4893	4893	78.7093	MS2	10/36
	NGEIIVGDAAK	5	1	CID		9.94071	1.4181	0	1	2	1086.58	-0.37042	939	939	35.3774	MS2	10/20
	NEVDQAIFATEK	5	1	CID		3.25649	1.36562	0	1	2	1364.67	-0.0642481	2408	2408	51.5391	MS2	9/22
	QALSDAGLSLSEIDEVILVGGSTR	5	1	CID		10.3218	1.29075	0	1	3	2430.28	5.0266	5145	5145	81.8162	MS2	18/92
	SVNPDEVVAmGAAIQGGVITGDVK	5	1	CID	M10(Oxidation)	19.8862	1.28906	0	1	2	2343.19	-1.09011	6212	6212	98.6899	MS2	12/46
	DAAQAALDDLKK	5	1	CID		31.9708	1.28015	0	1	3	1258.67	1.57761	2791	2791	55.7013	MS2	15/44
	SVNPDEVVAmGAAIQGGVITGDVK	5	1	CID	M10(Oxidation)	12.2018	1.22203	0	1	2	2343.19	2.32786	4140	4140	70.1319	MS2	9/46
	DAAQAALDDLKK	5	1	CID		15.0271	1.20139	0	1	3	1258.67	1.3945	2235	2235	49.6494	MS2	16/44
	EQTIVIQSNSGLTDEEIDR	5	1	CID		2.8486	1.00702	0	1	2	2147.04	-2.59253	6211	6211	98.6838	MS2	8/36
	SVNPDEVVAmGAAIQGGVITGDVK	5	1	CID	M10(Oxidation)	5.39526	0.963056	0	1	2	2343.18	-5.97292	4886	4886	78.6061	MS2	9/46
	VTKAVITVPAYFnDAqR	5	1	CID	N13(Deamidated) Q16(Deamidated)	11.3992	0.746418	0	1	4	1894.99	-3.77998	2932	2932	57.2297	MS2	17/96
	EQTIVIQSNSGLTDEEIDR	5	1	CID		6.63917	0.518148	0	1	2	2147.04	-2.34839	6311	6311	101.721	MS2	8/36
	SVNPDEVVAmGAAIQGGVITGDVK	5	1	CID	M10(Oxidation)	3.95292	0.516041	0	1	2	2343.19	2.08372	4602	4602	75.345	MS2	12/46
	DAAQAALDDLKK	5	1	CID		7.64689	0.481241	0	1	2	1258.66	0.522939	6388	6388	104.863	MS2	4/22
	KAQENNNLDDmKAK	1	1	CID	M11(Oxidation)	8.29974	0.417883	0	1	2	1634.79	10.4728	1761	1761	44.44	MS2	5/26
gi225858961	40.36	36	840	43.6697	pneumococcal histidine triad protein B [Streptococcus pneumoniae 70585]
	Sequence	# Proteins	# Protein Groups	Activation Type	Modifications	Probability	XCorr	Δ Score	Rank	Charge	MH+ [Da]	ΔM [ppm]	First Scan	Last Scan	RT [min]	MSOrder	Ions Matched	Annotation
	HVESDGLVFDPAQITSR	12	5	CID		75.0201	3.88574	0	1	3	1870.93	1.00277	3146	3146	59.5206	MS2	29/64
	TNWVPSVSNPGTTNTNTSNNSNTNSQASQSNDIDSLLK	14	9	CID		47.5719	3.80185	0	1	3	4007.85	2.93428	3433	3433	62.548	MS2	30/148
	NELSASELAAAEAFLSGR	14	9	CID		90.2249	3.41329	0	1	2	1835.91	-0.225693	4878	4878	78.5281	MS2	20/34
	HVESDGLVFDPAQITSR	12	5	CID		126.745	3.37404	0	1	2	1870.93	-0.326553	3099	3099	59.0125	MS2	20/32
	YYVEHPNERPHSDNGFGNASDHVQR	18	12	CID		86.581	3.02686	0	1	4	2925.3	-0.987586	974	974	35.7875	MS2	45/144
	NELSASELAAAEAFLSGR	14	9	CID		33.8975	2.87578	0	1	3	1835.91	0.798458	4960	4960	79.561	MS2	24/68
	SNHWVPDSRPEEPSPQPTPEPSPSPQPAPNPQPAPSNPIDEK	3	3	CID		13.6682	2.75193	0.0390773	5	4	4532.14	5.05445	1914	1914	46.1904	MS2	43/246
	EEKPQSEKPESPKPTEEPEEESPEESEEPQVETEK	5	5	CID		58.7926	2.56962	0	1	4	4051.82	0.645304	980	980	35.8595	MS2	38/204
	SNHWVPDSRPEEPSPQPTPEPSPSPQPAPNPQPAPSNPIDEK	3	3	CID		6.31419	2.49036	0.0801684	4	4	4532.14	-1.78149	2194	2194	49.2329	MS2	35/246
	NELSASELAAAEAFLSGR	14	9	CID		47.2359	2.48164	0	1	2	1835.91	-0.347764	6034	6034	95.509	MS2	16/34
	EEKPQSEKPESPKPTEEPEEESPEESEEPQVETEKVEEK	5	5	CID		27.2498	2.45087	0	1	4	4537.07	8.15882	1161	1161	37.9314	MS2	36/228
	QVDFEALDNLLER	21	12	CID		82.2385	2.43183	0	1	2	1561.79	0.0729003	4767	4767	77.2139	MS2	18/24
	VGDGYVFEENGVSR	17	12	CID		48.855	2.37985	0	1	2	1527.71	-0.158311	2118	2118	48.414	MS2	13/26
	DLSAETAAGIDSK	21	12	CID		26.5528	2.11013	0	1	2	1277.62	-0.2696	1442	1442	41.0292	MS2	14/24
	LGKPNAQITYTDDEIQVAK	23	13	CID		43.4663	1.89176	0	1	2	2104.09	-0.805107	1978	1978	46.887	MS2	15/36
	YYVEHPNERPHSDNGFGNASDHVQR	18	12	CID		27.6834	1.76761	0	1	3	2925.31	1.28416	982	982	35.8886	MS2	20/96
	DLSAETAAGIDSK	21	12	CID		36.9505	1.73408	0	1	2	1277.62	0.584892	6245	6245	99.7357	MS2	11/24
	VGDGYVFEENGVSR	17	12	CID		32.7953	1.56321	0	1	2	1527.71	0.2079	1841	1841	45.3214	MS2	11/26
	VGDGYVFEENGVSR	17	12	CID		16.5469	1.42539	0	1	2	1527.71	-1.37901	2433	2433	51.8232	MS2	9/26
	TENLTPDEVSK	18	10	CID		19.0731	1.3754	0	1	2	1232.6	-0.762256	734	734	32.6623	MS2	7/20
	TDLPSSDREFYNK	24	14	CID		33.3388	1.33767	0	1	2	1571.74	7.21103	1344	1344	39.9646	MS2	12/24
	AYDLLAR	21	13	CID		31.1422	1.2945	0	1	2	821.454	2.72097	1705	1705	43.8712	MS2	10/12
	TDLPSSDREFYNK	24	14	CID		11.9494	1.26074	0	1	3	1571.73	-0.492851	1413	1413	40.7317	MS2	14/48
	DLSAETAAGIDSK	21	12	CID		16.2906	1.15982	0	1	2	1277.62	-0.51374	6337	6337	102.746	MS2	8/24
	NGQADTNQTEKPSEEKPQTEKPEEETPR	5	4	CID		3.36368	0.887882	0	1	4	3197.48	0.0116325	510	510	28.4082	MS2	28/162
	HVESDGLVFDPAQITSR	12	5	CID		4.2249	0.861097	0.0543606	2	3	1870.93	2.28451	3438	3438	62.5933	MS2	15/64
	VGDGYVFEENGVSR	17	12	CID		15.1492	0.762354	0	1	2	1527.71	-1.50108	6396	6396	105.233	MS2	5/26
	DITSDEGDAYVTPHmTHSHWIK	25	15	CID	M15(Oxidation)	13.7074	0.751742	0	1	5	2556.15	0.913616	1911	1911	46.1575	MS2	29/168
	DSDIVNEIK	15	8	CID		7.72277	0.724031	0	1	2	1032.52	0.456533	1228	1228	38.6662	MS2	6/16
	VNGKYYVYLK	7	5	CID		10.5302	0.720905	0.537294	2	3	1246.69	7.3515	2830	2830	56.1346	MS2	7/36
	DITSDEGDAYVTPHmTHSHWIK	25	15	CID	M15(Oxidation)	3.65572	0.595476	0.203806	2	4	2556.15	1.04913	1797	1797	44.8656	MS2	23/126
	DLSAETAAGIDSK	21	12	CID		13.4342	0.561454	0	1	2	1277.62	-0.39167	3101	3101	59.0245	MS2	5/24
	NELSASELAAAEAFLSGR	14	9	CID		14.3977	0.52376	0	1	2	1835.91	-0.958115	5653	5653	89.4393	MS2	6/34
	KTDLPSSDREFYNK	24	14	CID		46.4006	0.517171	0	1	3	1699.83	-0.370077	1091	1091	37.2409	MS2	15/52
	VGDGYVFEENGVSR	17	12	CID		2.07344	0.474028	0	1	2	1527.71	-1.37901	2852	2852	56.3826	MS2	5/26
	DLSAETAAGIDSK	21	12	CID		7.89403	0.414568	0	1	2	1277.62	0.951103	6479	6479	108.866	MS2	5/24
gi225858942	23.31	32	1943	40.4116	immunoglobulin A1 protease [Streptococcus pneumoniae 70585]
	Sequence	# Proteins	# Protein Groups	Activation Type	Modifications	Probability	XCorr	Δ Score	Rank	Charge	MH+ [Da]	ΔM [ppm]	First Scan	Last Scan	RT [min]	MSOrder	Ions Matched	Annotation
	VSPDTSSENTGEVSSNPSDSTTSVGESNQPEK	1	1	CID		300	4.27508	0	1	3	3253.41	0.636348	943	943	35.4182	MS2	40/124
	TATKPENSGNTTSENGPTEPSNGNSTEDVSTESNTSNSNGNEEIK	1	1	CID		58.3554	3.71564	0	1	4	4626.99	1.54898	846	846	34.2236	MS2	35/264
	SDQTVGGLAGLVDQDAHIQNSYAEGDINNVK	2	1	CID		51.963	3.27688	0	1	3	3228.54	0.00916094	3910	3910	67.6097	MS2	31/120
	GEPAVQPELPEAVVSDK	2	2	CID		85.7833	3.07048	0	1	2	1764.9	0.259697	2402	2402	51.4726	MS2	17/32
	DVQSGAIVEPALQPELPEAVVSDK	1	1	CID		73.8347	2.97021	0	1	2	2491.29	1.71989	3494	3494	63.2168	MS2	17/46
	DGAITYTHEmTHDSDQDIYLGGYGR	7	5	CID	M10(Oxidation)	49.8301	2.80427	0	1	3	2831.22	3.28826	2154	2154	48.8486	MS2	28/96
	GVPEVQPALPEAVVTDK	2	2	CID		5.26466	2.60875	0	1	2	1748.94	-0.805029	2677	2677	54.4374	MS2	13/32
	GVPEVQPALPEAVVTDKGEPAIQPELPEAVVTDK	1	1	CID		50.8198	2.56448	0	1	3	3522.86	1.8651	3862	3862	67.0483	MS2	20/132
	DVYIPVASITEEK	4	3	CID		59.3791	2.40036	0	1	2	1463.76	-0.72874	2987	2987	57.7592	MS2	17/24
	DDQVITDIVSNK	3	2	CID		44.9235	2.38849	0	2	2	1346.68	-0.126201	2448	2448	52.036	MS2	15/22
	IDFQEEIQENPDLAEGTVR	9	6	CID		27.0511	2.32569	0	1	2	2203.05	0.364111	3046	3046	58.4282	MS2	16/36
	DVQSGAIVEPALQPELPEAVVSDK	1	1	CID		24.5243	2.29335	0	1	2	2491.29	-1.20979	3782	3782	66.2355	MS2	14/46
	GEPAIQPELPEAVVTDKGEPAVQPELPEAVVSDK	1	1	CID		28.9627	2.00226	0	1	3	3538.82	1.70912	3688	3688	65.2178	MS2	24/132
	IDFQEEIQENPDLAEGTVR	9	6	CID		16.3221	1.93422	0	1	3	2203.05	0.472735	3244	3244	60.5507	MS2	22/72
	VSPDTSSENTGEVSSNPSDSTTSVGESNQPEK	1	1	CID		40.9687	1.92415	0	1	3	3253.41	-3.39197	1242	1242	38.8352	MS2	21/124
	AINQNPSGTYHLAASLNANEVELGPDER	4	3	CID		36.7309	1.8924	0	1	3	2980.44	0.82254	3090	3090	58.9292	MS2	22/108
	GVPEVQPALPEAVVTDK	2	2	CID		27.005	1.88472	0	1	2	1748.94	-0.194678	2960	2960	57.4885	MS2	10/32
	NDIGSLANEATNGTK	3	2	CID		73.2527	1.83095	0	1	2	1504.72	-0.180889	1820	1820	45.1073	MS2	15/28
	TGVNTLNPQDEVLSGQLNKPELLYR	12	8	CID		10.5751	1.73555	0	1	3	2798.48	8.7957	3511	3511	63.3804	MS2	14/96
	TEEVPVKPTEETPVNPNEGTTEGTSIQEAENPVQPAEESTTNSEK	5	4	CID		22.8391	1.53787	0	1	4	4824.24	2.61788	2260	2260	49.9141	MS2	29/264
	SDQTVGGLAGLVDQDAHIQNSYAEGDINNVK	2	1	CID		3.29023	1.43832	0	1	3	3228.54	-3.28674	6172	6172	97.9611	MS2	20/120
	GNTSPLDTLIELGK	3	2	CID		14.7185	1.35745	0	1	2	1457.79	1.75325	4403	4403	73.0353	MS2	9/26
	AEINPLTLPTVEPLSTSGK	2	1	CID		4.13314	1.30365	0	1	2	1967.07	2.06157	4056	4056	69.2384	MS2	8/36
	GNIEQVKPETPVEK	7	5	CID		6.76548	1.12941	0	1	3	1567.83	-0.747968	886	886	34.6678	MS2	12/52
	GEPAIQPELPEAVVTDK	1	1	CID		15.1283	1.1136	0	1	2	1792.93	-0.522725	2727	2727	55.0381	MS2	9/32
	AEINPLTLPTVEPLSTSGK	2	1	CID		3.62855	1.05647	0	1	2	1967.07	0.474658	3751	3751	65.9404	MS2	7/36
	LNSQSQLAELPNTGSK	1	1	CID		3.5395	0.950451	0	1	3	1686.85	-11.4281	2237	2237	49.6604	MS2	12/60
	TGVNTLNPQDEVLSGQLNKPELLYR	12	8	CID		4.18094	0.878502	0	1	3	2798.47	1.47149	4097	4097	69.6645	MS2	10/96
	DGAITYTHEmTHDSDQDIYLGGYGR	7	5	CID	M10(Oxidation)	16.5737	0.840202	0	1	4	2831.22	-4.23251	2335	2335	50.7106	MS2	22/144
	ITAKAEKLqqELEnK	4	3	CID	Q9(Deamidated) Q10(Deamidated) N14(Deamidated)	2.64235	0.81096	0	1	3	1745.91	-7.8496	5151	5151	81.8791	MS2	9/56
	LDYqSDAIRK	3	2	CID	Q4(Deamidated)	4.26939	0.701161	0	1	3	1209.62	10.8535	1980	1980	46.8993	MS2	10/36
	TGVNTLNPQDEVLSGQLNKPELLYR	12	8	CID		28.2259	0.564565	0	1	2	2798.47	6.00153	3537	3537	63.6416	MS2	11/48
gi225858796	33.88	39	853	40.0444	pneumococcal histidine triad protein B [Streptococcus pneumoniae 70585]
	Sequence	# Proteins	# Protein Groups	Activation Type	Modifications	Probability	XCorr	Δ Score	Rank	Charge	MH+ [Da]	ΔM [ppm]	First Scan	Last Scan	RT [min]	MSOrder	Ions Matched	Annotation
	NGQADTNQTEKPNEEKPQTEKPEEDKEHDEVSEPTHPESDEK	3	2	CID		77.5158	4.5502	0	1	4	4830.14	3.19819	569	569	29.8478	MS2	43/246
	NELSASELAAAEAYWNGK	7	4	CID		102.669	3.78835	0	2	2	1923.91	0.723916	3804	3804	66.4619	MS2	22/34
	YYVEHPNERPHSDNGFGNASDHVQR	18	12	CID		86.581	3.02686	0	1	4	2925.3	-0.987586	974	974	35.7875	MS2	45/144
	NELSASELAAAEAYWNGK	7	4	CID		68.5498	2.98649	0	2	2	1923.91	0.113564	5799	5799	91.863	MS2	14/34
	NGQADTNQTEKPNEEKPQTEKPEEDKEHDEVSEPTHPESDEK	3	2	CID		51.9348	2.98347	0	1	5	4830.14	6.17547	596	596	30.2746	MS2	55/328
	SNHWVPDSRPEEPSPQPTPEPSPSPQPAPNPQPAPSNPIDEK	3	3	CID		13.6682	2.75193	0.0390773	5	4	4532.14	5.05445	1914	1914	46.1904	MS2	43/246
	NGQADTNQTEKPNEEKPQTEKPEEDKEHDEVSEPTHPESDEK	3	2	CID		19.0841	2.57945	0	1	5	4830.14	0.377131	780	780	33.314	MS2	51/328
	SNHWVPDSRPEEPSPQPTPEPSPSPQPAPNPQPAPSNPIDEK	3	3	CID		6.31419	2.49036	0.0801684	4	4	4532.14	-1.78149	2194	2194	49.2329	MS2	35/246
	QVDFEALDNLLER	21	12	CID		82.2385	2.43183	0	1	2	1561.79	0.0729003	4767	4767	77.2139	MS2	18/24
	NELSASELAAAEAYWNGK	7	4	CID		31.6864	2.42758	0	2	2	1923.91	2.31083	4768	4768	77.2197	MS2	15/34
	VGDGYVFEENGVSR	17	12	CID		48.855	2.37985	0	1	2	1527.71	-0.158311	2118	2118	48.414	MS2	13/26
	NELSASELAAAEAYWNGK	7	4	CID		11.2081	2.28667	0	2	2	1923.91	-1.83956	6169	6169	97.9166	MS2	11/34
	NELSASELAAAEAYWNGK	7	4	CID		12.6549	2.20483	0	2	3	1923.91	1.07668	3854	3854	66.9698	MS2	16/68
	DLSAETAAGIDSK	21	12	CID		26.5528	2.11013	0	1	2	1277.62	-0.2696	1442	1442	41.0292	MS2	14/24
	LGKPNAQITYTDDEIQVAK	23	13	CID		43.4663	1.89176	0	1	2	2104.09	-0.805107	1978	1978	46.887	MS2	15/36
	YYVEHPNERPHSDNGFGNASDHVQR	18	12	CID		27.6834	1.76761	0	1	3	2925.31	1.28416	982	982	35.8886	MS2	20/96
	DLSAETAAGIDSK	21	12	CID		36.9505	1.73408	0	1	2	1277.62	0.584892	6245	6245	99.7357	MS2	11/24
	DNNTISAEVDSLLALLK	13	7	CID		15.4173	1.70538	0	1	3	1815.97	0.693907	5524	5524	87.4989	MS2	22/64
	VGDGYVFEENGVSR	17	12	CID		32.7953	1.56321	0	1	2	1527.71	0.2079	1841	1841	45.3214	MS2	11/26
	VGDGYVFEENGVSR	17	12	CID		16.5469	1.42539	0	1	2	1527.71	-1.37901	2433	2433	51.8232	MS2	9/26
	QNAVETLTGLK	3	2	CID		41.732	1.41257	0	1	2	1173.65	-0.166904	2569	2569	53.3323	MS2	10/20
	DNNTISAEVDSLLALLKK	7	3	CID		11.1101	1.41173	0	1	2	1944.06	-0.268506	5429	5429	86.0182	MS2	9/34
	TDLPSSDREFYNK	24	14	CID		33.3388	1.33767	0	1	2	1571.74	7.21103	1344	1344	39.9646	MS2	12/24
	NGQADTNQTEKPNEEKPQTEKPEEDKEHDEVSEPTHPESDEK	3	2	CID		23.1707	1.30911	0.190036	3	6	4830.15	11.35	597	597	30.2798	MS2	52/410
	AYDLLAR	21	13	CID		31.1422	1.2945	0	1	2	821.454	2.72097	1705	1705	43.8712	MS2	10/12
	IAEAEALLEK	5	3	CID		15.8179	1.28914	0	1	2	1086.6	-0.373936	2201	2201	49.2902	MS2	11/18
	TDLPSSDREFYNK	24	14	CID		11.9494	1.26074	0	1	3	1571.73	-0.492851	1413	1413	40.7317	MS2	14/48
	NELSASELAAAEAYWNGK	7	4	CID		15.5672	1.21909	0	2	2	1923.91	-2.20577	5608	5608	88.8027	MS2	6/34
	NGQADTNQTEKPNEEKPQTEKPEEDKEHDEVSEPTHPESDEK	3	2	CID		19.5466	1.19403	0	1	6	4830.13	-2.93221	781	781	33.3201	MS2	53/410
	DLSAETAAGIDSK	21	12	CID		16.2906	1.15982	0	1	2	1277.62	-0.51374	6337	6337	102.746	MS2	8/24
	GYTLEDLLATVK	20	13	CID		31.6484	0.863611	0	1	2	1322.72	-0.365068	4925	4925	79.146	MS2	6/22
	VGDGYVFEENGVSR	17	12	CID		15.1492	0.762354	0	1	2	1527.71	-1.50108	6396	6396	105.233	MS2	5/26
	DITSDEGDAYVTPHmTHSHWIK	25	15	CID	M15(Oxidation)	13.7074	0.751742	0	1	5	2556.15	0.913616	1911	1911	46.1575	MS2	29/168
	DSDIVNEIK	15	8	CID		7.72277	0.724031	0	1	2	1032.52	0.456533	1228	1228	38.6662	MS2	6/16
	DITSDEGDAYVTPHmTHSHWIK	25	15	CID	M15(Oxidation)	3.65572	0.595476	0.203806	2	4	2556.15	1.04913	1797	1797	44.8656	MS2	23/126
	DLSAETAAGIDSK	21	12	CID		13.4342	0.561454	0	1	2	1277.62	-0.39167	3101	3101	59.0245	MS2	5/24
	KTDLPSSDREFYNK	24	14	CID		46.4006	0.517171	0	1	3	1699.83	-0.370077	1091	1091	37.2409	MS2	15/52
	VGDGYVFEENGVSR	17	12	CID		2.07344	0.474028	0	1	2	1527.71	-1.37901	2852	2852	56.3826	MS2	5/26
	DLSAETAAGIDSK	21	12	CID		7.89403	0.414568	0	1	2	1277.62	0.951103	6479	6479	108.866	MS2	5/24
gi307128002	8.91	15	202	38.7921	Gls24 protein [Streptococcus pneumoniae 670-6B]
	Sequence	# Proteins	# Protein Groups	Activation Type	Modifications	Probability	XCorr	Δ Score	Rank	Charge	MH+ [Da]	ΔM [ppm]	First Scan	Last Scan	RT [min]	MSOrder	Ions Matched	Annotation
	VSDVAESTGEFTSEQFEK	1	1	CID		109.807	3.82408	0	1	2	1989.89	-0.690068	2465	2465	52.1946	MS2	20/34
	VSDVAESTGEFTSEQFEK	1	1	CID		135.498	3.79022	0	1	2	1989.89	-0.567998	5829	5829	92.3731	MS2	22/34
	VSDVAESTGEFTSEQFEK	1	1	CID		133.725	3.7026	0	1	2	1989.89	-1.05628	6027	6027	95.3921	MS2	21/34
	VSDVAESTGEFTSEQFEK	1	1	CID		113.785	3.52077	0	1	2	1989.89	1.5072	5647	5647	89.3681	MS2	21/34
	VSDVAESTGEFTSEQFEK	1	1	CID		136.324	3.48396	0	1	2	1989.89	-0.201787	2744	2744	55.2226	MS2	21/34
	VSDVAESTGEFTSEQFEK	1	1	CID		105.591	3.24825	0	1	2	1989.89	0.164424	6197	6197	98.4302	MS2	16/34
	VSDVAESTGEFTSEQFEK	1	1	CID		97.7617	2.91043	0	1	2	1989.89	-0.0797169	4326	4326	72.1953	MS2	15/34
	VSDVAESTGEFTSEQFEK	1	1	CID		127.932	2.78881	0	1	2	1989.89	-0.567998	3682	3682	65.1672	MS2	16/34
	VSDVAESTGEFTSEQFEK	1	1	CID		125.852	2.59349	0	1	2	1989.89	0.0423534	4040	4040	69.0465	MS2	16/34
	VSDVAESTGEFTSEQFEK	1	1	CID		99.8619	2.4832	0	1	2	1989.89	0.164424	3381	3381	62.0368	MS2	19/34
	VSDVAESTGEFTSEQFEK	1	1	CID		90.5306	2.44132	0	1	2	1989.89	-3.37562	4594	4594	75.2642	MS2	12/34
	VSDVAESTGEFTSEQFEK	1	1	CID		50.8026	2.29176	0	1	2	1989.89	-0.201787	6304	6304	101.455	MS2	14/34
	VSDVAESTGEFTSEQFEK	1	1	CID		66.7441	1.71316	0	1	2	1989.89	0.286494	4943	4943	79.3304	MS2	12/34
	VSDVAESTGEFTSEQFEK	1	1	CID		20.7756	0.892477	0	1	2	1989.89	2.36169	6378	6378	104.492	MS2	9/34
	VSDVAESTGEFTSEQFEK	1	1	CID		8.41156	0.520958	0	1	2	1989.89	-0.812139	6448	6448	107.499	MS2	7/34
gi225854647	34.69	37	862	38.5087	pneumococcal histidine triad protein B [Streptococcus pneumoniae JJA]
	Sequence	# Proteins	# Protein Groups	Activation Type	Modifications	Probability	XCorr	Δ Score	Rank	Charge	MH+ [Da]	ΔM [ppm]	First Scan	Last Scan	RT [min]	MSOrder	Ions Matched	Annotation
	NGQADTNQTEKPNEEKPQTEKPEEDKEHDEVSEPTHPESDEK	3	2	CID		77.5158	4.5502	0	1	4	4830.14	3.19819	569	569	29.8478	MS2	43/246
	HVESDGLVFDPAQITSR	12	5	CID		75.0201	3.88574	0	1	3	1870.93	1.00277	3146	3146	59.5206	MS2	29/64
	TNWVPSVSNPGTTNTNTSNNSNTNSQASQSNDIDSLLK	14	9	CID		47.5719	3.80185	0	1	3	4007.85	2.93428	3433	3433	62.548	MS2	30/148
	NELSASELAAAEAFLSGR	14	9	CID		90.2249	3.41329	0	1	2	1835.91	-0.225693	4878	4878	78.5281	MS2	20/34
	HVESDGLVFDPAQITSR	12	5	CID		126.745	3.37404	0	1	2	1870.93	-0.326553	3099	3099	59.0125	MS2	20/32
	YYVEHPNERPHSDNGFGNASDHVQR	18	12	CID		86.581	3.02686	0	1	4	2925.3	-0.987586	974	974	35.7875	MS2	45/144
	NGQADTNQTEKPNEEKPQTEKPEEDKEHDEVSEPTHPESDEK	3	2	CID		51.9348	2.98347	0	1	5	4830.14	6.17547	596	596	30.2746	MS2	55/328
	NELSASELAAAEAFLSGR	14	9	CID		33.8975	2.87578	0	1	3	1835.91	0.798458	4960	4960	79.561	MS2	24/68
	NGQADTNQTEKPNEEKPQTEKPEEDKEHDEVSEPTHPESDEK	3	2	CID		19.0841	2.57945	0	1	5	4830.14	0.377131	780	780	33.314	MS2	51/328
	NELSASELAAAEAFLSGR	14	9	CID		47.2359	2.48164	0	1	2	1835.91	-0.347764	6034	6034	95.509	MS2	16/34
	VGDGYVFEENGVSR	17	12	CID		48.855	2.37985	0	1	2	1527.71	-0.158311	2118	2118	48.414	MS2	13/26
	DLSAETAAGIDSK	21	12	CID		26.5528	2.11013	0	1	2	1277.62	-0.2696	1442	1442	41.0292	MS2	14/24
	LGKPNAQITYTDDEIQVAK	23	13	CID		43.4663	1.89176	0	1	2	2104.09	-0.805107	1978	1978	46.887	MS2	15/36
	YYVEHPNERPHSDNGFGNASDHVQR	18	12	CID		27.6834	1.76761	0	1	3	2925.31	1.28416	982	982	35.8886	MS2	20/96
	DLSAETAAGIDSK	21	12	CID		36.9505	1.73408	0	1	2	1277.62	0.584892	6245	6245	99.7357	MS2	11/24
	DNNTISAEVDSLLALLK	13	7	CID		15.4173	1.70538	0	1	3	1815.97	0.693907	5524	5524	87.4989	MS2	22/64
	VGDGYVFEENGVSR	17	12	CID		32.7953	1.56321	0	1	2	1527.71	0.2079	1841	1841	45.3214	MS2	11/26
	VGDGYVFEENGVSR	17	12	CID		16.5469	1.42539	0	1	2	1527.71	-1.37901	2433	2433	51.8232	MS2	9/26
	QNAVETLTGLK	3	2	CID		41.732	1.41257	0	1	2	1173.65	-0.166904	2569	2569	53.3323	MS2	10/20
	TENLTPDEVSK	18	10	CID		19.0731	1.3754	0	1	2	1232.6	-0.762256	734	734	32.6623	MS2	7/20
	TDLPSSDREFYNK	24	14	CID		33.3388	1.33767	0	1	2	1571.74	7.21103	1344	1344	39.9646	MS2	12/24
	NGQADTNQTEKPNEEKPQTEKPEEDKEHDEVSEPTHPESDEK	3	2	CID		23.1707	1.30911	0.190036	3	6	4830.15	11.35	597	597	30.2798	MS2	52/410
	TDLPSSDREFYNK	24	14	CID		11.9494	1.26074	0	1	3	1571.73	-0.492851	1413	1413	40.7317	MS2	14/48
	NGQADTNQTEKPNEEKPQTEKPEEDKEHDEVSEPTHPESDEK	3	2	CID		19.5466	1.19403	0	1	6	4830.13	-2.93221	781	781	33.3201	MS2	53/410
	DLSAETAAGIDSK	21	12	CID		16.2906	1.15982	0	1	2	1277.62	-0.51374	6337	6337	102.746	MS2	8/24
	GYTLEDLLATVK	20	13	CID		31.6484	0.863611	0	1	2	1322.72	-0.365068	4925	4925	79.146	MS2	6/22
	HVESDGLVFDPAQITSR	12	5	CID		4.2249	0.861097	0.0543606	2	3	1870.93	2.28451	3438	3438	62.5933	MS2	15/64
	NDGAVALARSqGR	12	5	CID	Q11(Deamidated)	16.0131	0.813382	0	1	2	1315.68	4.20741	1685	1685	43.6765	MS2	7/24
	VGDGYVFEENGVSR	17	12	CID		15.1492	0.762354	0	1	2	1527.71	-1.50108	6396	6396	105.233	MS2	5/26
	DITSDEGDAYVTPHmTHSHWIK	25	15	CID	M15(Oxidation)	13.7074	0.751742	0	1	5	2556.15	0.913616	1911	1911	46.1575	MS2	29/168
	qVDFEVLDNLLER	3	2	CID	Q1(Deamidated)	2.77115	0.73058	0	1	2	1590.82	15.2745	1780	1780	44.6571	MS2	7/24
	DITSDEGDAYVTPHmTHSHWIK	25	15	CID	M15(Oxidation)	3.65572	0.595476	0.203806	2	4	2556.15	1.04913	1797	1797	44.8656	MS2	23/126
	DLSAETAAGIDSK	21	12	CID		13.4342	0.561454	0	1	2	1277.62	-0.39167	3101	3101	59.0245	MS2	5/24
	NELSASELAAAEAFLSGR	14	9	CID		14.3977	0.52376	0	1	2	1835.91	-0.958115	5653	5653	89.4393	MS2	6/34
	KTDLPSSDREFYNK	24	14	CID		46.4006	0.517171	0	1	3	1699.83	-0.370077	1091	1091	37.2409	MS2	15/52
	VGDGYVFEENGVSR	17	12	CID		2.07344	0.474028	0	1	2	1527.71	-1.37901	2852	2852	56.3826	MS2	5/26
	DLSAETAAGIDSK	21	12	CID		7.89403	0.414568	0	1	2	1277.62	0.951103	6479	6479	108.866	MS2	5/24
gi307127228	43.68	11	87	37.8435	phosphocarrier protein HPr [Streptococcus pneumoniae 670-6B]
	Sequence	# Proteins	# Protein Groups	Activation Type	Modifications	Probability	XCorr	Δ Score	Rank	Charge	MH+ [Da]	ΔM [ppm]	First Scan	Last Scan	RT [min]	MSOrder	Ions Matched	Annotation
	SImGVmSLGVGQGADVTISAEGADADDAIAAISETmEK	1	1	CID	M3(Oxidation) M6(Oxidation) M36(Oxidation)	109.919	4.93109	0	1	3	3758.73	4.22147	5742	5742	90.8964	MS2	38/148
	SImGVmSLGVGQGADVTISAEGADADDAIAAISETmEK	1	1	CID	M3(Oxidation) M6(Oxidation) M36(Oxidation)	300	4.60178	0	1	3	3758.73	-0.173066	5550	5550	87.8584	MS2	39/148
	SImGVmSLGVGQGADVTISAEGADADDAIAAISETmEK	1	1	CID	M3(Oxidation) M6(Oxidation) M36(Oxidation)	76.7665	4.24589	0	1	3	3758.73	0.925567	5928	5928	93.9177	MS2	30/148
	SImGVmSLGVGQGADVTISAEGADADDAIAAISETmEK	1	1	CID	M3(Oxidation) M6(Oxidation) M36(Oxidation)	146.122	3.64923	0	1	3	3758.73	3.85525	6116	6116	96.9299	MS2	34/148
	SImGVmSLGVGQGADVTISAEGADADDAIAAISETmEK	1	1	CID	M3(Oxidation) M6(Oxidation) M36(Oxidation)	136.492	3.64609	0	1	3	3758.73	2.75662	4598	4598	75.3042	MS2	36/148
	SImGVmSLGVGQGADVTISAEGADADDAIAAISETmEK	1	1	CID	M3(Oxidation) M6(Oxidation) M36(Oxidation)	109.226	3.52661	0	1	3	3758.73	-1.2717	4860	4860	78.3268	MS2	28/148
	SImGVmSLGVGQGADVTISAEGADADDAIAAISETmEK	1	1	CID	M3(Oxidation) M6(Oxidation) M36(Oxidation)	73.1936	3.25112	0	1	3	3758.73	2.0242	5110	5110	81.4296	MS2	31/148
	SImGVmSLGVGQGADVTISAEGADADDAIAAISETmEK	1	1	CID	M3(Oxidation) M6(Oxidation) M36(Oxidation)	68.1975	2.80607	0	1	4	3758.72	-4.52001	6042	6042	95.6082	MS2	47/222
	SImGVmSLGVGQGADVTISAEGADADDAIAAISETmEK	1	1	CID	M3(Oxidation) M6(Oxidation) M36(Oxidation)	68.1618	2.49497	0	1	3	3758.72	-8.59592	5345	5345	84.846	MS2	25/148
	SImGVmSLGVGQGADVTISAEGADADDAIAAISETmEK	1	1	CID	M3(Oxidation) M6(Oxidation) M36(Oxidation)	12.872	2.40453	0	1	3	3758.73	2.75662	4333	4333	72.2703	MS2	23/148
	SImGVmSLGVGQGADVTISAEGADADDAIAAISETmEK	1	1	CID	M3(Oxidation) M6(Oxidation) M36(Oxidation)	84.2582	2.28617	0	1	3	3758.73	2.39041	6251	6251	99.9499	MS2	30/148
gi194397660	34.88	41	840	36.0862	histidine triad protein PhtA/B [Streptococcus pneumoniae G54]
	Sequence	# Proteins	# Protein Groups	Activation Type	Modifications	Probability	XCorr	Δ Score	Rank	Charge	MH+ [Da]	ΔM [ppm]	First Scan	Last Scan	RT [min]	MSOrder	Ions Matched	Annotation
	HVESDGLVFDPAQITSR	12	5	CID		75.0201	3.88574	0	1	3	1870.93	1.00277	3146	3146	59.5206	MS2	29/64
	TNWVPSVSNPGTTNTNTSNNSNTNSQASQSNDIDSLLK	14	9	CID		47.5719	3.80185	0	1	3	4007.85	2.93428	3433	3433	62.548	MS2	30/148
	NELSASELAAAEAFLSGR	14	9	CID		90.2249	3.41329	0	1	2	1835.91	-0.225693	4878	4878	78.5281	MS2	20/34
	HVESDGLVFDPAQITSR	12	5	CID		126.745	3.37404	0	1	2	1870.93	-0.326553	3099	3099	59.0125	MS2	20/32
	YYVEHPNERPHSDNGFGNASDHVQR	18	12	CID		86.581	3.02686	0	1	4	2925.3	-0.987586	974	974	35.7875	MS2	45/144
	NELSASELAAAEAFLSGR	14	9	CID		33.8975	2.87578	0	1	3	1835.91	0.798458	4960	4960	79.561	MS2	24/68
	SNHWVPDSRPEQPSPQPTPEPSPSPQPVPNPQPAPSnPIDEK	1	1	CID	N37(Deamidated)	8.94996	2.67931	0	1	4	4560.13	-36.0072	2015	2015	47.2374	MS2	32/246
	NELSASELAAAEAFLSGR	14	9	CID		47.2359	2.48164	0	1	2	1835.91	-0.347764	6034	6034	95.509	MS2	16/34
	QVDFEALDNLLER	21	12	CID		82.2385	2.43183	0	1	2	1561.79	0.0729003	4767	4767	77.2139	MS2	18/24
	VGDGYVFEENGVSR	17	12	CID		48.855	2.37985	0	1	2	1527.71	-0.158311	2118	2118	48.414	MS2	13/26
	SNHWVPDSRPEQPSPQPTPEPSPSPQPVPnPQPAPSNPIDEK	1	1	CID	N30(Deamidated)	20.8333	2.35111	0.122492	2	4	4560.13	-36.0072	2015	2015	47.2374	MS2	33/246
	SNHWVPDSRPEQPSPQPTPEPSPSPqPVPNPQPAPSNPIDEK	1	1	CID	Q26(Deamidated)	20.8333	2.32274	0.133082	3	4	4560.13	-36.0072	2015	2015	47.2374	MS2	35/246
	SNHWVPDSRPEQPSPqPTPEPSPSPQPVPNPQPAPSNPIDEK	1	1	CID	Q16(Deamidated)	8.94996	2.27621	0.150449	4	4	4560.13	-36.0072	2015	2015	47.2374	MS2	35/246
	SNHWVPDSRPEQPSPQPTPEPSPSPQPVPNPqPAPSNPIDEK	1	1	CID	Q32(Deamidated)	14.5703	2.23043	0.167534	5	4	4560.13	-36.0072	2015	2015	47.2374	MS2	33/246
	DLSAETAAGIDSK	21	12	CID		26.5528	2.11013	0	1	2	1277.62	-0.2696	1442	1442	41.0292	MS2	14/24
	SNHWVPDSRPEqPSPQPTPEPSPSPQPVPNPQPAPSNPIDEK	1	1	CID	Q12(Deamidated)	4.29565	1.96538	0.266459	7	4	4560.13	-36.0072	2015	2015	47.2374	MS2	33/246
	LGKPNAQITYTDDEIQVAK	23	13	CID		43.4663	1.89176	0	1	2	2104.09	-0.805107	1978	1978	46.887	MS2	15/36
	YYVEHPNERPHSDNGFGNASDHVQR	18	12	CID		27.6834	1.76761	0	1	3	2925.31	1.28416	982	982	35.8886	MS2	20/96
	DLSAETAAGIDSK	21	12	CID		36.9505	1.73408	0	1	2	1277.62	0.584892	6245	6245	99.7357	MS2	11/24
	VGDGYVFEENGVSR	17	12	CID		32.7953	1.56321	0	1	2	1527.71	0.2079	1841	1841	45.3214	MS2	11/26
	NGQADTnQTEKPNEEKPQTEKPEEETPR	7	4	CID	N7(Deamidated)	9.16243	1.48033	0	1	5	3225.48	0.687655	589	589	30.1756	MS2	36/216
	NGQADTNqTEKPNEEKPQTEKPEEETPR	7	4	CID	Q8(Deamidated)	16.4481	1.47747	0.00193124	2	5	3225.48	0.687655	589	589	30.1756	MS2	36/216
	VGDGYVFEENGVSR	17	12	CID		16.5469	1.42539	0	1	2	1527.71	-1.37901	2433	2433	51.8232	MS2	9/26
	TENLTPDEVSK	18	10	CID		19.0731	1.3754	0	1	2	1232.6	-0.762256	734	734	32.6623	MS2	7/20
	NGQADTNQTEKPNEEKPqTEKPEEETPR	7	4	CID	Q18(Deamidated)	16.4481	1.34195	0.0934796	3	5	3225.48	0.687655	589	589	30.1756	MS2	33/216
	TDLPSSDREFYNK	24	14	CID		33.3388	1.33767	0	1	2	1571.74	7.21103	1344	1344	39.9646	MS2	12/24
	NGqADTNQTEKPNEEKPQTEKPEEETPR	7	4	CID	Q3(Deamidated)	3.41324	1.33026	0.101381	4	5	3225.48	0.687655	589	589	30.1756	MS2	35/216
	AYDLLAR	21	13	CID		31.1422	1.2945	0	1	2	821.454	2.72097	1705	1705	43.8712	MS2	10/12
	TDLPSSDREFYNK	24	14	CID		11.9494	1.26074	0	1	3	1571.73	-0.492851	1413	1413	40.7317	MS2	14/48
	NGQADTNQTEKPnEEKPQTEKPEEETPR	7	4	CID	N13(Deamidated)	16.4481	1.20735	0.18441	6	5	3225.48	0.687655	589	589	30.1756	MS2	36/216
	DLSAETAAGIDSK	21	12	CID		16.2906	1.15982	0	1	2	1277.62	-0.51374	6337	6337	102.746	MS2	8/24
	GYTLEDLLATVK	20	13	CID		31.6484	0.863611	0	1	2	1322.72	-0.365068	4925	4925	79.146	MS2	6/22
	HVESDGLVFDPAQITSR	12	5	CID		4.2249	0.861097	0.0543606	2	3	1870.93	2.28451	3438	3438	62.5933	MS2	15/64
	VGDGYVFEENGVSR	17	12	CID		15.1492	0.762354	0	1	2	1527.71	-1.50108	6396	6396	105.233	MS2	5/26
	DITSDEGDAYVTPHmTHSHWIK	25	15	CID	M15(Oxidation)	13.7074	0.751742	0	1	5	2556.15	0.913616	1911	1911	46.1575	MS2	29/168
	DITSDEGDAYVTPHmTHSHWIK	25	15	CID	M15(Oxidation)	3.65572	0.595476	0.203806	2	4	2556.15	1.04913	1797	1797	44.8656	MS2	23/126
	DLSAETAAGIDSK	21	12	CID		13.4342	0.561454	0	1	2	1277.62	-0.39167	3101	3101	59.0245	MS2	5/24
	NELSASELAAAEAFLSGR	14	9	CID		14.3977	0.52376	0	1	2	1835.91	-0.958115	5653	5653	89.4393	MS2	6/34
	KTDLPSSDREFYNK	24	14	CID		46.4006	0.517171	0	1	3	1699.83	-0.370077	1091	1091	37.2409	MS2	15/52
	VGDGYVFEENGVSR	17	12	CID		2.07344	0.474028	0	1	2	1527.71	-1.37901	2852	2852	56.3826	MS2	5/26
	DLSAETAAGIDSK	21	12	CID		7.89403	0.414568	0	1	2	1277.62	0.951103	6479	6479	108.866	MS2	5/24
gi116515876	13.57	26	619	33.414	pneumococcal surface protein A [Streptococcus pneumoniae D39]
	Sequence	# Proteins	# Protein Groups	Activation Type	Modifications	Probability	XCorr	Δ Score	Rank	Charge	MH+ [Da]	ΔM [ppm]	First Scan	Last Scan	RT [min]	MSOrder	Ions Matched	Annotation
	LSKLEELSDKIDELDAEIAK	3	3	CID		154.775	5.39946	0	1	3	2259.2	0.639513	4559	4559	74.8752	MS2	35/76
	LEELSDKIDELDAEIAK	3	3	CID		90.442	4.6889	0	1	3	1930.99	1.19926	3907	3907	67.5597	MS2	33/64
	LEELSDKIDELDAEIAK	3	3	CID		64.8693	3.45515	0	1	2	1930.99	-0.374209	3844	3844	66.8796	MS2	18/32
	LEELSDKIDELDAEIAK	3	3	CID		89.9264	3.34579	0	1	2	1930.98	-2.08319	4121	4121	69.9378	MS2	14/32
	LEELSDKIDELDAEIAK	3	3	CID		59.3407	3.133	0	1	3	1930.99	1.01615	4173	4173	70.5867	MS2	23/64
	LEELSDKIDELDAEIAK	3	3	CID		47.2505	2.5053	0	1	3	1930.98	-1.54732	3626	3626	64.5524	MS2	22/64
	LEELSDKIDELDAEIAK	3	3	CID		44.7313	2.37629	0	1	3	1930.98	-1.18111	6217	6217	98.7622	MS2	22/64
	IDELDAEIAK	5	4	CID		59.0938	2.22225	0	1	2	1116.58	-0.0666309	1735	1735	44.1708	MS2	16/18
	LEELSDKIDELDAEIAK	3	3	CID		4.72481	2.15235	0	1	2	1930.99	-0.252139	6037	6037	95.5441	MS2	10/32
	IAELENqVHR	2	2	CID	Q7(Deamidated)	23.4785	2.10857	0	2	2	1209.62	-0.0373184	968	968	35.7121	MS2	11/18
	IAELEnQVHR	2	2	CID	N6(Deamidated)	23.4785	2.08833	0.00960187	3	2	1209.62	-0.0373184	968	968	35.7121	MS2	11/18
	LSKLEELSDKIDELDAEIAK	3	3	CID		17.0895	2.02693	0	1	3	2259.2	1.92125	4969	4969	79.6796	MS2	16/76
	LEELSDKIDELDAEIAK	3	3	CID		4.01045	1.93908	0	1	3	1930.99	0.283731	4449	4449	73.6124	MS2	17/64
	IDELDAEIAK	5	4	CID		12.486	1.42649	0	1	2	1116.58	-0.188701	2090	2090	48.1054	MS2	13/18
	IAELENqVHR	2	2	CID	Q7(Deamidated)	25.0933	1.29311	0	1	3	1209.62	0.529069	1399	1399	40.5886	MS2	16/36
	IAELEnQVHR	2	2	CID	N6(Deamidated)	25.0933	1.18771	0.0815071	3	3	1209.62	0.529069	1399	1399	40.5886	MS2	15/36
	IAELEnQVHR	2	2	CID	N6(Deamidated)	25.6563	1.06546	0	1	3	1209.62	0.712175	1124	1124	37.5797	MS2	13/36
	IAELENqVHR	2	2	CID	Q7(Deamidated)	25.6563	1.06348	0.0018536	2	3	1209.62	0.712175	1124	1124	37.5797	MS2	13/36
	TDDQQAEEDYAR	5	4	CID		25.123	1.04664	0	1	2	1440.59	1.01521	503	503	28.138	MS2	7/22
	SEEEYnRLTqqqPPK	3	3	CID	N6(Deamidated) Q10(Deamidated) Q11(Deamidated) Q12(Deamidated)	2.86573	0.572799	0.634908	4	3	1850.84	11.1998	1602	1602	42.7415	MS2	8/56
	AAQKKYDEDQKK	1	1	CID		4.72213	0.539556	0	1	3	1451.74	-8.52018	6086	6086	96.3928	MS2	10/44
	AAQKKYDEDQKK	1	1	CID		2.99793	0.478778	0	1	3	1451.74	-12.5485	4548	4548	74.7438	MS2	7/44
	IDELDAEIAK	5	4	CID		8.29	0.474321	0	1	2	1116.58	-2.50804	6097	6097	96.5926	MS2	5/18
	DGDTWYYLEASGAmK	8	7	CID	M14(Oxidation)	3.59506	0.464857	0	1	2	1722.73	0.701103	2835	2835	56.1928	MS2	5/28
	TDDQQAEEDYAR	5	4	CID		15.3308	0.406585	0	1	2	1440.59	-0.205498	437	437	25.132	MS2	4/22
	AAQKKYDEDQKK	1	1	CID		3.43681	0.401545	0	1	3	1451.74	-9.71037	4277	4277	71.6635	MS2	5/44
gi307127232	38.21	29	840	32.5657	pneumococcal histidine triad protein B [Streptococcus pneumoniae 670-6B]
	Sequence	# Proteins	# Protein Groups	Activation Type	Modifications	Probability	XCorr	Δ Score	Rank	Charge	MH+ [Da]	ΔM [ppm]	First Scan	Last Scan	RT [min]	MSOrder	Ions Matched	Annotation
	TNWVPSVSNPGTTNTNTSNNSNTNSQASQSNDIDSLLK	14	9	CID		47.5719	3.80185	0	1	3	4007.85	2.93428	3433	3433	62.548	MS2	30/148
	NELSASELAAAEAFLSGR	14	9	CID		90.2249	3.41329	0	1	2	1835.91	-0.225693	4878	4878	78.5281	MS2	20/34
	YYVEHPNERPHSDNGFGNASDHVQR	18	12	CID		86.581	3.02686	0	1	4	2925.3	-0.987586	974	974	35.7875	MS2	45/144
	NELSASELAAAEAFLSGR	14	9	CID		33.8975	2.87578	0	1	3	1835.91	0.798458	4960	4960	79.561	MS2	24/68
	SNHWVPDSRPEEPSPQPTPEPSPSPQPAPNPQPAPSNPIDEK	3	3	CID		13.6682	2.75193	0.0390773	5	4	4532.14	5.05445	1914	1914	46.1904	MS2	43/246
	EEKPQSEKPESPKPTEEPEEESPEESEEPQVETEK	5	5	CID		58.7926	2.56962	0	1	4	4051.82	0.645304	980	980	35.8595	MS2	38/204
	SNHWVPDSRPEEPSPQPTPEPSPSPQPAPNPQPAPSNPIDEK	3	3	CID		6.31419	2.49036	0.0801684	4	4	4532.14	-1.78149	2194	2194	49.2329	MS2	35/246
	NELSASELAAAEAFLSGR	14	9	CID		47.2359	2.48164	0	1	2	1835.91	-0.347764	6034	6034	95.509	MS2	16/34
	EEKPQSEKPESPKPTEEPEEESPEESEEPQVETEKVEEK	5	5	CID		27.2498	2.45087	0	1	4	4537.07	8.15882	1161	1161	37.9314	MS2	36/228
	QVDFEALDNLLER	21	12	CID		82.2385	2.43183	0	1	2	1561.79	0.0729003	4767	4767	77.2139	MS2	18/24
	VGDGYVFEENGVSR	17	12	CID		48.855	2.37985	0	1	2	1527.71	-0.158311	2118	2118	48.414	MS2	13/26
	LGKPNAQITYTDDEIQVAK	23	13	CID		43.4663	1.89176	0	1	2	2104.09	-0.805107	1978	1978	46.887	MS2	15/36
	YYVEHPNERPHSDNGFGNASDHVQR	18	12	CID		27.6834	1.76761	0	1	3	2925.31	1.28416	982	982	35.8886	MS2	20/96
	VGDGYVFEENGVSR	17	12	CID		32.7953	1.56321	0	1	2	1527.71	0.2079	1841	1841	45.3214	MS2	11/26
	VGDGYVFEENGVSR	17	12	CID		16.5469	1.42539	0	1	2	1527.71	-1.37901	2433	2433	51.8232	MS2	9/26
	TENLTPDEVSK	18	10	CID		19.0731	1.3754	0	1	2	1232.6	-0.762256	734	734	32.6623	MS2	7/20
	TDLPSSDREFYNK	24	14	CID		33.3388	1.33767	0	1	2	1571.74	7.21103	1344	1344	39.9646	MS2	12/24
	AYDLLAR	21	13	CID		31.1422	1.2945	0	1	2	821.454	2.72097	1705	1705	43.8712	MS2	10/12
	TDLPSSDREFYNK	24	14	CID		11.9494	1.26074	0	1	3	1571.73	-0.492851	1413	1413	40.7317	MS2	14/48
	NGQADTNQTEKPSEEKPQTEKPEEETPR	5	4	CID		3.36368	0.887882	0	1	4	3197.48	0.0116325	510	510	28.4082	MS2	28/162
	GYTLEDLLATVK	20	13	CID		31.6484	0.863611	0	1	2	1322.72	-0.365068	4925	4925	79.146	MS2	6/22
	VGDGYVFEENGVSR	17	12	CID		15.1492	0.762354	0	1	2	1527.71	-1.50108	6396	6396	105.233	MS2	5/26
	DITSDEGDAYVTPHmTHSHWIK	25	15	CID	M15(Oxidation)	13.7074	0.751742	0	1	5	2556.15	0.913616	1911	1911	46.1575	MS2	29/168
	DSDIVNEIK	15	8	CID		7.72277	0.724031	0	1	2	1032.52	0.456533	1228	1228	38.6662	MS2	6/16
	VNGKYYVYLK	7	5	CID		10.5302	0.720905	0.537294	2	3	1246.69	7.3515	2830	2830	56.1346	MS2	7/36
	DITSDEGDAYVTPHmTHSHWIK	25	15	CID	M15(Oxidation)	3.65572	0.595476	0.203806	2	4	2556.15	1.04913	1797	1797	44.8656	MS2	23/126
	NELSASELAAAEAFLSGR	14	9	CID		14.3977	0.52376	0	1	2	1835.91	-0.958115	5653	5653	89.4393	MS2	6/34
	KTDLPSSDREFYNK	24	14	CID		46.4006	0.517171	0	1	3	1699.83	-0.370077	1091	1091	37.2409	MS2	15/52
	VGDGYVFEENGVSR	17	12	CID		2.07344	0.474028	0	1	2	1527.71	-1.37901	2852	2852	56.3826	MS2	5/26
gi225861112	29.42	36	826	32.2889	pneumococcal histidine triad protein B [Streptococcus pneumoniae Taiwan19F-14]
	Sequence	# Proteins	# Protein Groups	Activation Type	Modifications	Probability	XCorr	Δ Score	Rank	Charge	MH+ [Da]	ΔM [ppm]	First Scan	Last Scan	RT [min]	MSOrder	Ions Matched	Annotation
	NELSASELAAAEAYWNGK	7	4	CID		102.669	3.78835	0	2	2	1923.91	0.723916	3804	3804	66.4619	MS2	22/34
	YYVEHPNERPHSDNGFGNASDHVQR	18	12	CID		86.581	3.02686	0	1	4	2925.3	-0.987586	974	974	35.7875	MS2	45/144
	NELSASELAAAEAYWNGK	7	4	CID		68.5498	2.98649	0	2	2	1923.91	0.113564	5799	5799	91.863	MS2	14/34
	EEKPQSEKPESPKPTEEPEEESPEESEEPQVETEK	5	5	CID		58.7926	2.56962	0	1	4	4051.82	0.645304	980	980	35.8595	MS2	38/204
	EEKPQSEKPESPKPTEEPEEESPEESEEPQVETEKVEEK	5	5	CID		27.2498	2.45087	0	1	4	4537.07	8.15882	1161	1161	37.9314	MS2	36/228
	QVDFEALDNLLER	21	12	CID		82.2385	2.43183	0	1	2	1561.79	0.0729003	4767	4767	77.2139	MS2	18/24
	NELSASELAAAEAYWNGK	7	4	CID		31.6864	2.42758	0	2	2	1923.91	2.31083	4768	4768	77.2197	MS2	15/34
	VGDGYVFEENGVSR	17	12	CID		48.855	2.37985	0	1	2	1527.71	-0.158311	2118	2118	48.414	MS2	13/26
	NELSASELAAAEAYWNGK	7	4	CID		11.2081	2.28667	0	2	2	1923.91	-1.83956	6169	6169	97.9166	MS2	11/34
	NELSASELAAAEAYWNGK	7	4	CID		12.6549	2.20483	0	2	3	1923.91	1.07668	3854	3854	66.9698	MS2	16/68
	DLSAETAAGIDSK	21	12	CID		26.5528	2.11013	0	1	2	1277.62	-0.2696	1442	1442	41.0292	MS2	14/24
	LGKPNAQITYTDDEIQVAK	23	13	CID		43.4663	1.89176	0	1	2	2104.09	-0.805107	1978	1978	46.887	MS2	15/36
	YYVEHPNERPHSDNGFGNASDHVQR	18	12	CID		27.6834	1.76761	0	1	3	2925.31	1.28416	982	982	35.8886	MS2	20/96
	DLSAETAAGIDSK	21	12	CID		36.9505	1.73408	0	1	2	1277.62	0.584892	6245	6245	99.7357	MS2	11/24
	VGDGYVFEENGVSR	17	12	CID		32.7953	1.56321	0	1	2	1527.71	0.2079	1841	1841	45.3214	MS2	11/26
	NGQADTnQTEKPNEEKPQTEKPEEETPR	7	4	CID	N7(Deamidated)	9.16243	1.48033	0	1	5	3225.48	0.687655	589	589	30.1756	MS2	36/216
	NGQADTNqTEKPNEEKPQTEKPEEETPR	7	4	CID	Q8(Deamidated)	16.4481	1.47747	0.00193124	2	5	3225.48	0.687655	589	589	30.1756	MS2	36/216
	VGDGYVFEENGVSR	17	12	CID		16.5469	1.42539	0	1	2	1527.71	-1.37901	2433	2433	51.8232	MS2	9/26
	NGQADTNQTEKPNEEKPqTEKPEEETPR	7	4	CID	Q18(Deamidated)	16.4481	1.34195	0.0934796	3	5	3225.48	0.687655	589	589	30.1756	MS2	33/216
	TDLPSSDREFYNK	24	14	CID		33.3388	1.33767	0	1	2	1571.74	7.21103	1344	1344	39.9646	MS2	12/24
	NGqADTNQTEKPNEEKPQTEKPEEETPR	7	4	CID	Q3(Deamidated)	3.41324	1.33026	0.101381	4	5	3225.48	0.687655	589	589	30.1756	MS2	35/216
	AYDLLAR	21	13	CID		31.1422	1.2945	0	1	2	821.454	2.72097	1705	1705	43.8712	MS2	10/12
	TDLPSSDREFYNK	24	14	CID		11.9494	1.26074	0	1	3	1571.73	-0.492851	1413	1413	40.7317	MS2	14/48
	NELSASELAAAEAYWNGK	7	4	CID		15.5672	1.21909	0	2	2	1923.91	-2.20577	5608	5608	88.8027	MS2	6/34
	NGQADTNQTEKPnEEKPQTEKPEEETPR	7	4	CID	N13(Deamidated)	16.4481	1.20735	0.18441	6	5	3225.48	0.687655	589	589	30.1756	MS2	36/216
	DLSAETAAGIDSK	21	12	CID		16.2906	1.15982	0	1	2	1277.62	-0.51374	6337	6337	102.746	MS2	8/24
	GYTLEDLLATVK	20	13	CID		31.6484	0.863611	0	1	2	1322.72	-0.365068	4925	4925	79.146	MS2	6/22
	VGDGYVFEENGVSR	17	12	CID		15.1492	0.762354	0	1	2	1527.71	-1.50108	6396	6396	105.233	MS2	5/26
	DITSDEGDAYVTPHmTHSHWIK	25	15	CID	M15(Oxidation)	13.7074	0.751742	0	1	5	2556.15	0.913616	1911	1911	46.1575	MS2	29/168
	DSDIVNEIK	15	8	CID		7.72277	0.724031	0	1	2	1032.52	0.456533	1228	1228	38.6662	MS2	6/16
	VNGKYYVYLK	7	5	CID		10.5302	0.720905	0.537294	2	3	1246.69	7.3515	2830	2830	56.1346	MS2	7/36
	DITSDEGDAYVTPHmTHSHWIK	25	15	CID	M15(Oxidation)	3.65572	0.595476	0.203806	2	4	2556.15	1.04913	1797	1797	44.8656	MS2	23/126
	DLSAETAAGIDSK	21	12	CID		13.4342	0.561454	0	1	2	1277.62	-0.39167	3101	3101	59.0245	MS2	5/24
	KTDLPSSDREFYNK	24	14	CID		46.4006	0.517171	0	1	3	1699.83	-0.370077	1091	1091	37.2409	MS2	15/52
	VGDGYVFEENGVSR	17	12	CID		2.07344	0.474028	0	1	2	1527.71	-1.37901	2852	2852	56.3826	MS2	5/26
	DLSAETAAGIDSK	21	12	CID		7.89403	0.414568	0	1	2	1277.62	0.951103	6479	6479	108.866	MS2	5/24
gi307128455	8.69	18	932	31.3054	surface protein PspC [Streptococcus pneumoniae 670-6B]
	Sequence	# Proteins	# Protein Groups	Activation Type	Modifications	Probability	XCorr	Δ Score	Rank	Charge	MH+ [Da]	ΔM [ppm]	First Scan	Last Scan	RT [min]	MSOrder	Ions Matched	Annotation
	LSKLEELSDKIDELDAEIAK	3	3	CID		154.775	5.39946	0	1	3	2259.2	0.639513	4559	4559	74.8752	MS2	35/76
	LEELSDKIDELDAEIAK	3	3	CID		90.442	4.6889	0	1	3	1930.99	1.19926	3907	3907	67.5597	MS2	33/64
	LEELSDKIDELDAEIAK	3	3	CID		64.8693	3.45515	0	1	2	1930.99	-0.374209	3844	3844	66.8796	MS2	18/32
	LEELSDKIDELDAEIAK	3	3	CID		89.9264	3.34579	0	1	2	1930.98	-2.08319	4121	4121	69.9378	MS2	14/32
	LEELSDKIDELDAEIAK	3	3	CID		59.3407	3.133	0	1	3	1930.99	1.01615	4173	4173	70.5867	MS2	23/64
	LEELSDKIDELDAEIAK	3	3	CID		47.2505	2.5053	0	1	3	1930.98	-1.54732	3626	3626	64.5524	MS2	22/64
	LEELSDKIDELDAEIAK	3	3	CID		44.7313	2.37629	0	1	3	1930.98	-1.18111	6217	6217	98.7622	MS2	22/64
	IDELDAEIAK	5	4	CID		59.0938	2.22225	0	1	2	1116.58	-0.0666309	1735	1735	44.1708	MS2	16/18
	LEELSDKIDELDAEIAK	3	3	CID		4.72481	2.15235	0	1	2	1930.99	-0.252139	6037	6037	95.5441	MS2	10/32
	LSKLEELSDKIDELDAEIAK	3	3	CID		17.0895	2.02693	0	1	3	2259.2	1.92125	4969	4969	79.6796	MS2	16/76
	LEELSDKIDELDAEIAK	3	3	CID		4.01045	1.93908	0	1	3	1930.99	0.283731	4449	4449	73.6124	MS2	17/64
	IDELDAEIAK	5	4	CID		12.486	1.42649	0	1	2	1116.58	-0.188701	2090	2090	48.1054	MS2	13/18
	VDTKEQGKPKRR	1	1	CID		4.93186	1.03029	0.523629	2	2	1441.83	2.75817	2543	2543	53.0719	MS2	7/22
	EEAnESRnEEKIKqAK	1	1	CID	N4(Deamidated) N8(Deamidated) Q14(Deamidated)	11.7955	0.914952	0.0682275	2	3	1905.89	-15.4816	3302	3302	61.1141	MS2	12/60
	MLSEIQLDKR	1	1	CID		4.36328	0.779489	0	1	2	1232.66	-9.89335	4150	4150	70.2738	MS2	7/18
	EAELELVKEEANESR	1	1	CID		8.12827	0.527742	0.227808	3	3	1745.85	-0.88703	872	872	34.513	MS2	10/56
	IDELDAEIAK	5	4	CID		8.29	0.474321	0	1	2	1116.58	-2.50804	6097	6097	96.5926	MS2	5/18
	DGDTWYYLEASGAmK	8	7	CID	M14(Oxidation)	3.59506	0.464857	0	1	2	1722.73	0.701103	2835	2835	56.1928	MS2	5/28
gi298502824	32.5	34	840	31.1676	histidine triad protein PhtA/B [Streptococcus pneumoniae TCH8431/19A]
	Sequence	# Proteins	# Protein Groups	Activation Type	Modifications	Probability	XCorr	Δ Score	Rank	Charge	MH+ [Da]	ΔM [ppm]	First Scan	Last Scan	RT [min]	MSOrder	Ions Matched	Annotation
	TNWVPSVSNPGTTNTNTSNNSNTNSQASQSNDIDSLLK	14	9	CID		47.5719	3.80185	0	1	3	4007.85	2.93428	3433	3433	62.548	MS2	30/148
	NELSASELAAAEAFLSGR	14	9	CID		90.2249	3.41329	0	1	2	1835.91	-0.225693	4878	4878	78.5281	MS2	20/34
	YYVEHPNERPHSDNGFGNASDHVQR	18	12	CID		86.581	3.02686	0	1	4	2925.3	-0.987586	974	974	35.7875	MS2	45/144
	NELSASELAAAEAFLSGR	14	9	CID		33.8975	2.87578	0	1	3	1835.91	0.798458	4960	4960	79.561	MS2	24/68
	EEKPQSEKPESPKPTEEPEEESPEESEEPQVETEK	5	5	CID		58.7926	2.56962	0	1	4	4051.82	0.645304	980	980	35.8595	MS2	38/204
	NELSASELAAAEAFLSGR	14	9	CID		47.2359	2.48164	0	1	2	1835.91	-0.347764	6034	6034	95.509	MS2	16/34
	EEKPQSEKPESPKPTEEPEEESPEESEEPQVETEKVEEK	5	5	CID		27.2498	2.45087	0	1	4	4537.07	8.15882	1161	1161	37.9314	MS2	36/228
	QVDFEALDNLLER	21	12	CID		82.2385	2.43183	0	1	2	1561.79	0.0729003	4767	4767	77.2139	MS2	18/24
	VGDGYVFEENGVSR	17	12	CID		48.855	2.37985	0	1	2	1527.71	-0.158311	2118	2118	48.414	MS2	13/26
	DLSAETAAGIDSK	21	12	CID		26.5528	2.11013	0	1	2	1277.62	-0.2696	1442	1442	41.0292	MS2	14/24
	LGKPNAQITYTDDEIQVAK	23	13	CID		43.4663	1.89176	0	1	2	2104.09	-0.805107	1978	1978	46.887	MS2	15/36
	YYVEHPNERPHSDNGFGNASDHVQR	18	12	CID		27.6834	1.76761	0	1	3	2925.31	1.28416	982	982	35.8886	MS2	20/96
	DLSAETAAGIDSK	21	12	CID		36.9505	1.73408	0	1	2	1277.62	0.584892	6245	6245	99.7357	MS2	11/24
	VGDGYVFEENGVSR	17	12	CID		32.7953	1.56321	0	1	2	1527.71	0.2079	1841	1841	45.3214	MS2	11/26
	NGQADTnQTEKPNEEKPQTEKPEEETPR	7	4	CID	N7(Deamidated)	9.16243	1.48033	0	1	5	3225.48	0.687655	589	589	30.1756	MS2	36/216
	NGQADTNqTEKPNEEKPQTEKPEEETPR	7	4	CID	Q8(Deamidated)	16.4481	1.47747	0.00193124	2	5	3225.48	0.687655	589	589	30.1756	MS2	36/216
	VGDGYVFEENGVSR	17	12	CID		16.5469	1.42539	0	1	2	1527.71	-1.37901	2433	2433	51.8232	MS2	9/26
	TENLTPDEVSK	18	10	CID		19.0731	1.3754	0	1	2	1232.6	-0.762256	734	734	32.6623	MS2	7/20
	NGQADTNQTEKPNEEKPqTEKPEEETPR	7	4	CID	Q18(Deamidated)	16.4481	1.34195	0.0934796	3	5	3225.48	0.687655	589	589	30.1756	MS2	33/216
	TDLPSSDREFYNK	24	14	CID		33.3388	1.33767	0	1	2	1571.74	7.21103	1344	1344	39.9646	MS2	12/24
	NGqADTNQTEKPNEEKPQTEKPEEETPR	7	4	CID	Q3(Deamidated)	3.41324	1.33026	0.101381	4	5	3225.48	0.687655	589	589	30.1756	MS2	35/216
	AYDLLAR	21	13	CID		31.1422	1.2945	0	1	2	821.454	2.72097	1705	1705	43.8712	MS2	10/12
	TDLPSSDREFYNK	24	14	CID		11.9494	1.26074	0	1	3	1571.73	-0.492851	1413	1413	40.7317	MS2	14/48
	NGQADTNQTEKPnEEKPQTEKPEEETPR	7	4	CID	N13(Deamidated)	16.4481	1.20735	0.18441	6	5	3225.48	0.687655	589	589	30.1756	MS2	36/216
	DLSAETAAGIDSK	21	12	CID		16.2906	1.15982	0	1	2	1277.62	-0.51374	6337	6337	102.746	MS2	8/24
	GYTLEDLLATVK	20	13	CID		31.6484	0.863611	0	1	2	1322.72	-0.365068	4925	4925	79.146	MS2	6/22
	VGDGYVFEENGVSR	17	12	CID		15.1492	0.762354	0	1	2	1527.71	-1.50108	6396	6396	105.233	MS2	5/26
	DITSDEGDAYVTPHmTHSHWIK	25	15	CID	M15(Oxidation)	13.7074	0.751742	0	1	5	2556.15	0.913616	1911	1911	46.1575	MS2	29/168
	DITSDEGDAYVTPHmTHSHWIK	25	15	CID	M15(Oxidation)	3.65572	0.595476	0.203806	2	4	2556.15	1.04913	1797	1797	44.8656	MS2	23/126
	DLSAETAAGIDSK	21	12	CID		13.4342	0.561454	0	1	2	1277.62	-0.39167	3101	3101	59.0245	MS2	5/24
	NELSASELAAAEAFLSGR	14	9	CID		14.3977	0.52376	0	1	2	1835.91	-0.958115	5653	5653	89.4393	MS2	6/34
	KTDLPSSDREFYNK	24	14	CID		46.4006	0.517171	0	1	3	1699.83	-0.370077	1091	1091	37.2409	MS2	15/52
	VGDGYVFEENGVSR	17	12	CID		2.07344	0.474028	0	1	2	1527.71	-1.37901	2852	2852	56.3826	MS2	5/26
	DLSAETAAGIDSK	21	12	CID		7.89403	0.414568	0	1	2	1277.62	0.951103	6479	6479	108.866	MS2	5/24
gi225858962	29.01	27	817	29.4982	pneumococcal histidine triad protein B [Streptococcus pneumoniae 70585]
	Sequence	# Proteins	# Protein Groups	Activation Type	Modifications	Probability	XCorr	Δ Score	Rank	Charge	MH+ [Da]	ΔM [ppm]	First Scan	Last Scan	RT [min]	MSOrder	Ions Matched	Annotation
	HVESDGLVFDPAQITSR	12	5	CID		75.0201	3.88574	0	1	3	1870.93	1.00277	3146	3146	59.5206	MS2	29/64
	NELSASELAAAEAFLSGR	14	9	CID		90.2249	3.41329	0	1	2	1835.91	-0.225693	4878	4878	78.5281	MS2	20/34
	HVESDGLVFDPAQITSR	12	5	CID		126.745	3.37404	0	1	2	1870.93	-0.326553	3099	3099	59.0125	MS2	20/32
	SNHWVPDSRPEQPSPQQTPEPSPGPQPAPNLK	1	1	CID		25.2011	3.25146	0	1	4	3499.7	-3.12774	1719	1719	44.0315	MS2	43/186
	YYVEHPDERPHSNDGWGNASEHVLGK	7	2	CID		73.981	2.95891	0	1	4	2993.36	-1.09805	1813	1813	45.0193	MS2	35/150
	SNHWVPDSRPEQPSPQQTPEPSPGPQPAPNLK	1	1	CID		30.4585	2.91473	0	1	4	3499.7	-2.63946	1997	1997	47.074	MS2	35/186
	NELSASELAAAEAFLSGR	14	9	CID		33.8975	2.87578	0	1	3	1835.91	0.798458	4960	4960	79.561	MS2	24/68
	NELSASELAAAEAFLSGR	14	9	CID		47.2359	2.48164	0	1	2	1835.91	-0.347764	6034	6034	95.509	MS2	16/34
	NNLTLQImDNNSImAEAEK	6	2	CID	M8(Oxidation) M14(Oxidation)	45.6035	2.26997	0	1	2	2181.02	4.72239	6162	6162	97.7763	MS2	12/36
	ADEEPVEETPAEPEVPQVETEK	7	2	CID		38.071	2.07264	0	1	2	2452.12	-1.98683	2155	2155	48.8546	MS2	13/42
	NNLTLQImDNNSImAEAEK	6	2	CID	M8(Oxidation) M14(Oxidation)	29.8555	1.42217	0	1	2	2181.02	1.06028	6281	6281	100.785	MS2	14/36
	ADEEPVEETPAEPEVPQVETEK	7	2	CID		62.7022	1.41563	0	1	2	2452.13	0.698721	1883	1883	45.83	MS2	14/42
	TENLTPDEVSK	18	10	CID		19.0731	1.3754	0	1	2	1232.6	-0.762256	734	734	32.6623	MS2	7/20
	YYVEHPDERPHSNDGWGNASEHVLGK	7	2	CID		16.3006	1.30975	0	1	6	2993.36	2.47613	1826	1826	45.1721	MS2	41/250
	GVAVPHGDHYHFIPYSQmSELEER	7	3	CID	M18(Oxidation)	22.9422	1.29893	0	1	3	2814.29	-4.67344	2429	2429	51.7843	MS2	15/92
	ADEEPVEETPAEPEVPQVETEK	7	2	CID		21.4206	1.22997	0	1	2	2452.13	0.45458	2443	2443	51.9766	MS2	10/42
	NNLTLQImDNNSImAEAEK	6	2	CID	M8(Oxidation) M14(Oxidation)	9.93303	1.19423	0	1	2	2181.02	2.52513	2966	2966	57.5405	MS2	10/36
	NNLTLQImDNNSImAEAEK	6	2	CID	M8(Oxidation) M14(Oxidation)	38.5474	1.09493	0	1	2	2181.02	-0.648701	5901	5901	93.4948	MS2	7/36
	VGEGYVFEEK	7	2	CID		19.6707	1.08916	0	1	2	1156.55	-2.27901	1852	1852	45.4982	MS2	11/18
	EKLVDDLLAFLAPITHPER	7	2	CID		6.81798	0.922076	0.495029	2	4	2177.2	-1.38016	5542	5542	87.748	MS2	22/108
	HVESDGLVFDPAQITSR	12	5	CID		4.2249	0.861097	0.0543606	2	3	1870.93	2.28451	3438	3438	62.5933	MS2	15/64
	NDGAVALARSqGR	12	5	CID	Q11(Deamidated)	16.0131	0.813382	0	1	2	1315.68	4.20741	1685	1685	43.6765	MS2	7/24
	NNLTLQImDNNSImAEAEK	6	2	CID	M8(Oxidation) M14(Oxidation)	12.5807	0.806457	0	1	2	2181.02	-0.404561	2393	2393	51.3751	MS2	9/36
	LPYmVEHTVEVK	7	2	CID	M4(Oxidation)	13.6876	0.760306	0	1	3	1460.75	-0.0713371	1600	1600	42.7144	MS2	11/44
	EKGILPPSPDADVK	7	2	CID		2.661	0.73597	0	1	3	1465.79	-0.857753	1440	1440	41.001	MS2	12/52
	YYVEHPDERPHSNDGWGnASEHVLGK	7	2	CID	N18(Deamidated)	13.8591	0.609576	0	1	3	2994.32	-18.1817	3581	3581	64.0653	MS2	11/100
	NELSASELAAAEAFLSGR	14	9	CID		14.3977	0.52376	0	1	2	1835.91	-0.958115	5653	5653	89.4393	MS2	6/34
gi307127447	22.81	25	1039	28.8153	pneumococcal histidine triad protein E [Streptococcus pneumoniae 670-6B]
	Sequence	# Proteins	# Protein Groups	Activation Type	Modifications	Probability	XCorr	Δ Score	Rank	Charge	MH+ [Da]	ΔM [ppm]	First Scan	Last Scan	RT [min]	MSOrder	Ions Matched	Annotation
	YTTNDGYVFNPADIIEDTGNAYIVPHGGHYHYIPK	10	2	CID		82.1572	3.47713	0	1	4	3951.87	3.98585	4576	4576	75.0589	MS2	42/204
	NmQPSQLSYSSTASDNNTQSVAK	10	2	CID	M2(Oxidation)	119.517	3.4743	0	1	2	2474.11	1.06528	976	976	35.8177	MS2	18/44
	NmQPSQLSYSSTASDNNTQSVAK	10	2	CID	M2(Oxidation)	22.2235	2.78201	0	1	3	2474.11	0.0142391	979	979	35.8533	MS2	26/88
	EKLSETGNSTSNSTLEEVPTVDPVQEK	9	2	CID		19.7715	2.60157	0	1	3	2918.41	-0.864687	2200	2200	49.284	MS2	24/104
	YSESDGLVFDPAK	10	2	CID		46.6846	2.58179	0	1	2	1427.67	-2.53187	2389	2389	51.3368	MS2	13/24
	TSHNGLDSLSSHEQDYPSNAK	6	2	CID		26.9432	2.52081	0	1	4	2287.02	1.11484	1206	1206	38.4459	MS2	31/120
	LENVLFNmDGTIELYLPSGEVIK	10	2	CID	M8(Oxidation)	70.4611	2.2103	0	1	2	2610.34	0.193642	5023	5023	80.4206	MS2	20/44
	NmQPSQLSYSSTASDNNTQSVAK	10	2	CID	M2(Oxidation)	96.8293	2.06045	0	1	2	2474.1	-5.77065	1246	1246	38.8727	MS2	14/44
	NmADFTGEAPQGNGENKPSENGK	9	2	CID	M2(Oxidation)	40.7236	1.97361	0	1	3	2408.04	-1.16963	838	838	34.107	MS2	22/88
	TSHNGLDSLSSHEQDYPSNAK	6	2	CID		59.9512	1.87714	0	1	3	2287.02	-0.885878	1156	1156	37.8728	MS2	25/80
	LSETGNSTSNSTLEEVPTVDPVQEK	9	2	CID		49.3675	1.85633	0	1	2	2661.28	3.78419	2302	2302	50.3357	MS2	16/48
	LSETGNSTSNSTLEEVPTVDPVQEK	9	2	CID		23.343	1.80114	0	1	2	2661.27	-2.07519	2858	2858	56.4482	MS2	15/48
	nmADFTGEAPQGNGENKPSENGK	9	2	CID	N1(Deamidated) M2(Oxidation)	25.8382	1.78581	0	1	2	2409.03	3.29217	730	730	32.6123	MS2	10/44
	LENVLFNmDGTIELYLPSGEVIKK	10	2	CID	M8(Oxidation)	13.7629	1.74621	0	1	3	2738.43	-0.978769	4626	4626	75.6027	MS2	20/92
	NmADFTGEAPqGNGENKPSENGK	9	2	CID	M2(Oxidation) Q11(Deamidated)	35.1829	1.71289	0.040833	2	2	2409.03	3.29217	730	730	32.6123	MS2	10/44
	NmADFTGEAPQGNGEnKPSENGK	9	2	CID	M2(Oxidation) N16(Deamidated)	17.4009	1.67908	0.059765	3	2	2409.03	3.29217	730	730	32.6123	MS2	10/44
	NmADFTGEAPQGnGENKPSENGK	9	2	CID	M2(Oxidation) N13(Deamidated)	25.8382	1.66692	0.0665756	4	2	2409.03	3.29217	730	730	32.6123	MS2	10/44
	LSETGNSTSNSTLEEVPTVDPVQEK	9	2	CID		61.4226	1.66363	0	1	2	2661.27	-2.31933	2570	2570	53.3378	MS2	15/48
	ENQTDKPSILPQFK	10	2	CID		48.4665	1.51285	0	1	2	1644.86	-0.663193	2348	2348	50.8325	MS2	9/26
	NmADFTGEAPQGNGENKPSEnGK	9	2	CID	M2(Oxidation) N21(Deamidated)	10.0558	1.41484	0.20773	5	2	2409.03	3.29217	730	730	32.6123	MS2	9/44
	LSETGNSTSNSTLEEVPTVDPVQEK	9	2	CID		3.15905	1.30895	0	1	2	2661.28	3.05177	3524	3524	63.5194	MS2	10/48
	LSETGNSTSNSTLEEVPTVDPVQEK	9	2	CID		20.4772	0.97523	0	1	2	2661.28	9.8877	3167	3167	59.7525	MS2	10/48
	DNEKVNSNVAVARSQGR	9	1	CID		9.33921	0.964067	0.192974	2	3	1843.94	6.08705	2496	2496	52.577	MS2	14/64
	VFGEGVGNIANFELDQPYLPGQTFK	10	2	CID		4.32307	0.588148	0	1	2	2740.36	0.765127	4711	4711	76.5665	MS2	7/48
	AqEnSKLDEKVEEPK	9	2	CID	Q2(Deamidated) N4(Deamidated)	2.46193	0.57784	0.154504	2	3	1745.85	10.351	872	872	34.513	MS2	8/56
gi225860984	22.43	25	1039	28.8153	pneumococcal histidine triad protein E [Streptococcus pneumoniae Taiwan19F-14]
	Sequence	# Proteins	# Protein Groups	Activation Type	Modifications	Probability	XCorr	Δ Score	Rank	Charge	MH+ [Da]	ΔM [ppm]	First Scan	Last Scan	RT [min]	MSOrder	Ions Matched	Annotation
	YTTNDGYVFNPADIIEDTGNAYIVPHGGHYHYIPK	10	2	CID		82.1572	3.47713	0	1	4	3951.87	3.98585	4576	4576	75.0589	MS2	42/204
	NmQPSQLSYSSTASDNNTQSVAK	10	2	CID	M2(Oxidation)	119.517	3.4743	0	1	2	2474.11	1.06528	976	976	35.8177	MS2	18/44
	NmQPSQLSYSSTASDNNTQSVAK	10	2	CID	M2(Oxidation)	22.2235	2.78201	0	1	3	2474.11	0.0142391	979	979	35.8533	MS2	26/88
	EKLSETGNSTSNSTLEEVPTVDPVQEK	9	2	CID		19.7715	2.60157	0	1	3	2918.41	-0.864687	2200	2200	49.284	MS2	24/104
	YSESDGLVFDPAK	10	2	CID		46.6846	2.58179	0	1	2	1427.67	-2.53187	2389	2389	51.3368	MS2	13/24
	TSHNGLDSLSSHEQDYPSNAK	6	2	CID		26.9432	2.52081	0	1	4	2287.02	1.11484	1206	1206	38.4459	MS2	31/120
	LENVLFNmDGTIELYLPSGEVIK	10	2	CID	M8(Oxidation)	70.4611	2.2103	0	1	2	2610.34	0.193642	5023	5023	80.4206	MS2	20/44
	NmQPSQLSYSSTASDNNTQSVAK	10	2	CID	M2(Oxidation)	96.8293	2.06045	0	1	2	2474.1	-5.77065	1246	1246	38.8727	MS2	14/44
	NmADFTGEAPQGNGENKPSENGK	9	2	CID	M2(Oxidation)	40.7236	1.97361	0	1	3	2408.04	-1.16963	838	838	34.107	MS2	22/88
	TSHNGLDSLSSHEQDYPSNAK	6	2	CID		59.9512	1.87714	0	1	3	2287.02	-0.885878	1156	1156	37.8728	MS2	25/80
	LSETGNSTSNSTLEEVPTVDPVQEK	9	2	CID		49.3675	1.85633	0	1	2	2661.28	3.78419	2302	2302	50.3357	MS2	16/48
	LSETGNSTSNSTLEEVPTVDPVQEK	9	2	CID		23.343	1.80114	0	1	2	2661.27	-2.07519	2858	2858	56.4482	MS2	15/48
	nmADFTGEAPQGNGENKPSENGK	9	2	CID	N1(Deamidated) M2(Oxidation)	25.8382	1.78581	0	1	2	2409.03	3.29217	730	730	32.6123	MS2	10/44
	LENVLFNmDGTIELYLPSGEVIKK	10	2	CID	M8(Oxidation)	13.7629	1.74621	0	1	3	2738.43	-0.978769	4626	4626	75.6027	MS2	20/92
	NmADFTGEAPqGNGENKPSENGK	9	2	CID	M2(Oxidation) Q11(Deamidated)	35.1829	1.71289	0.040833	2	2	2409.03	3.29217	730	730	32.6123	MS2	10/44
	NmADFTGEAPQGNGEnKPSENGK	9	2	CID	M2(Oxidation) N16(Deamidated)	17.4009	1.67908	0.059765	3	2	2409.03	3.29217	730	730	32.6123	MS2	10/44
	NmADFTGEAPQGnGENKPSENGK	9	2	CID	M2(Oxidation) N13(Deamidated)	25.8382	1.66692	0.0665756	4	2	2409.03	3.29217	730	730	32.6123	MS2	10/44
	LSETGNSTSNSTLEEVPTVDPVQEK	9	2	CID		61.4226	1.66363	0	1	2	2661.27	-2.31933	2570	2570	53.3378	MS2	15/48
	ENQTDKPSILPQFK	10	2	CID		48.4665	1.51285	0	1	2	1644.86	-0.663193	2348	2348	50.8325	MS2	9/26
	NmADFTGEAPQGNGENKPSEnGK	9	2	CID	M2(Oxidation) N21(Deamidated)	10.0558	1.41484	0.20773	5	2	2409.03	3.29217	730	730	32.6123	MS2	9/44
	LSETGNSTSNSTLEEVPTVDPVQEK	9	2	CID		3.15905	1.30895	0	1	2	2661.28	3.05177	3524	3524	63.5194	MS2	10/48
	LSETGNSTSNSTLEEVPTVDPVQEK	9	2	CID		20.4772	0.97523	0	1	2	2661.28	9.8877	3167	3167	59.7525	MS2	10/48
	InSnVAVARSQGR	1	1	CID	N2(Deamidated) N4(Deamidated)	4.95527	0.841596	0.314418	2	2	1373.71	-0.539217	4731	4731	76.8195	MS2	7/24
	VFGEGVGNIANFELDQPYLPGQTFK	10	2	CID		4.32307	0.588148	0	1	2	2740.36	0.765127	4711	4711	76.5665	MS2	7/48
	AqEnSKLDEKVEEPK	9	2	CID	Q2(Deamidated) N4(Deamidated)	2.46193	0.57784	0.154504	2	3	1745.85	10.351	872	872	34.513	MS2	8/56
gi116517042	25.08	28	1312	27.8903	beta-N-acetylhexosaminidase [Streptococcus pneumoniae D39]
	Sequence	# Proteins	# Protein Groups	Activation Type	Modifications	Probability	XCorr	Δ Score	Rank	Charge	MH+ [Da]	ΔM [ppm]	First Scan	Last Scan	RT [min]	MSOrder	Ions Matched	Annotation
	LQETVNNLTLTPEAQKEEEAKR	10	1	CID		64.4838	3.49805	0	1	4	2541.32	0.215304	1827	1827	45.1784	MS2	31/126
	GTNDYYNDPNGNHLTESQmTDLINYAK	13	1	CID	M19(Oxidation)	73.122	3.29269	0	1	3	3104.35	0.456934	2403	2403	51.4785	MS2	26/104
	TEEKPQEEVSSTPSDKAEVVTPTSAEK	13	1	CID		25.8011	3.20162	0	1	3	2903.4	-1.32723	1015	1015	36.2529	MS2	22/104
	GTNDYYNDPNGNHLTESQMTDLINYAK	13	1	CID		50.4524	2.83461	0	1	3	3088.36	-1.45424	3402	3402	62.2546	MS2	24/104
	NADGQGWYNLDQGLNGIK	14	1	CID		69.8748	2.71255	0	1	2	1962.94	4.59489	3493	3493	63.2107	MS2	17/34
	HFANANAEYFAADYESAEQALNEVPK	11	1	CID		23.0252	2.44909	0	1	3	2899.32	-0.366757	4395	4395	72.9535	MS2	17/100
	AALQGLKPAATHSGSLDENEVAANVETRPELITR	13	1	CID		58.2077	2.38359	0	1	4	3558.85	2.66124	2789	2789	55.6888	MS2	33/198
	TEGADIPIIGGmVAAWADTPSAR	14	1	CID	M12(Oxidation)	25.9606	2.25031	0	1	2	2315.13	0.0703613	4363	4363	72.6144	MS2	17/44
	EVINQVVEVGSPVTHK	4	1	CID		52.436	2.1951	0	1	2	1734.94	-2.83476	2068	2068	47.8552	MS2	15/30
	TEEIPFEVIK	14	1	CID		31.8827	1.97245	0	1	2	1204.65	0.368603	3173	3173	59.8339	MS2	10/18
	LQETVNNLTLTPEAQKEEEAK	10	1	CID		58.991	1.85088	0	1	2	2385.22	3.82802	1960	1960	46.692	MS2	14/40
	KTEIFNIGLDEYANDATDAK	14	1	CID		50.5956	1.63293	0	1	2	2228.07	2.92333	3404	3404	62.2665	MS2	13/38
	AYYDDPNGTALTQAEVTELIEYAK	14	1	CID		20.7041	1.37057	0	1	3	2675.27	-4.08764	4599	4599	75.3102	MS2	18/92
	LQETVNNLTLTPEAQKEEEAKR	10	1	CID		9.24683	1.12839	0	1	3	2541.32	0.411856	1778	1778	44.6453	MS2	16/84
	AYYDDPNGTALTQAEVTELIEYAK	14	1	CID		95.116	1.12006	0	1	2	2675.27	-1.57175	4590	4590	75.2079	MS2	11/46
	GWWGYNLASPqYLASKGYK	14	1	CID	Q11(Deamidated)	11.3125	1.07672	0	1	4	2190.05	-15.5798	2597	2597	53.599	MS2	23/108
	TEIFNIGLDEYANDATDAK	14	1	CID		17.3524	1.03435	0	1	2	2099.99	11.4675	3832	3832	66.7587	MS2	6/36
	LQETVnNLTLTPEAqK	10	1	CID	N6(Deamidated) Q15(Deamidated)	2.67421	0.972854	0	1	2	1800.91	-14.7388	3192	3192	60.0388	MS2	7/30
	IFNFGTDEYAnDATSAqGWYYLK	14	1	CID	N11(Deamidated) Q17(Deamidated)	16.0382	0.958275	0.51484	2	2	2676.19	11.2791	2793	2793	55.7269	MS2	8/44
	LQETVnnLTLTPEAQK	10	1	CID	N6(Deamidated) N7(Deamidated)	2.67421	0.948449	0.0250857	2	2	1800.91	-14.7388	3192	3192	60.0388	MS2	8/30
	QDEAYPLSKAVEnSGK	5	1	CID	N13(Deamidated)	4.78059	0.857736	0.412846	2	2	1736.83	-0.629818	4042	4042	69.0746	MS2	7/30
	IFnFGTDEYAnDATSAQGWYYLK	14	1	CID	N3(Deamidated) N11(Deamidated)	3.3761	0.833834	0.577843	3	2	2676.19	11.2791	2793	2793	55.7269	MS2	6/44
	GWWGYnLASPQYLASKGYK	14	1	CID	N6(Deamidated)	19.3019	0.833811	0.225601	2	4	2190.05	-15.5798	2597	2597	53.599	MS2	22/108
	IFnFGTDEYANDATSAqGWYYLK	14	1	CID	N3(Deamidated) Q17(Deamidated)	8.83383	0.818553	0.585579	4	2	2676.19	11.2791	2793	2793	55.7269	MS2	6/44
	TEEIPFEVIKK	14	1	CID		11.5123	0.80296	0	1	2	1332.74	-0.241045	2500	2500	52.6164	MS2	6/20
	LqETVNNLTLTPEAqK	10	1	CID	Q2(Deamidated) Q15(Deamidated)	2.67421	0.782286	0.195886	4	2	1800.91	-14.7388	3192	3192	60.0388	MS2	7/30
	GLQPmAFNDGFYYEDKDDVQFDK	13	1	CID	M5(Oxidation)	3.90847	0.66984	0	1	3	2758.2	-2.02137	3271	3271	60.8201	MS2	12/88
	AYYDDPNGTALTQAEVTELIEYAK	14	1	CID		4.14352	0.477174	0.0808747	2	2	2675.27	-3.76901	4991	4991	79.9744	MS2	6/46
gi15901040	34.29	27	802	27.1339	hypothetical protein SP_1175 [Streptococcus pneumoniae TIGR4]
	Sequence	# Proteins	# Protein Groups	Activation Type	Modifications	Probability	XCorr	Δ Score	Rank	Charge	MH+ [Da]	ΔM [ppm]	First Scan	Last Scan	RT [min]	MSOrder	Ions Matched	Annotation
	HVESDGLVFDPAQITSR	12	5	CID		75.0201	3.88574	0	1	3	1870.93	1.00277	3146	3146	59.5206	MS2	29/64
	TNWVPSVSNPGTTNTNTSNNSNTNSQASQSNDIDSLLK	14	9	CID		47.5719	3.80185	0	1	3	4007.85	2.93428	3433	3433	62.548	MS2	30/148
	NELSASELAAAEAFLSGR	14	9	CID		90.2249	3.41329	0	1	2	1835.91	-0.225693	4878	4878	78.5281	MS2	20/34
	HVESDGLVFDPAQITSR	12	5	CID		126.745	3.37404	0	1	2	1870.93	-0.326553	3099	3099	59.0125	MS2	20/32
	YYVEHPDERPHSNDGWGNASEHVLGK	7	2	CID		73.981	2.95891	0	1	4	2993.36	-1.09805	1813	1813	45.0193	MS2	35/150
	NELSASELAAAEAFLSGR	14	9	CID		33.8975	2.87578	0	1	3	1835.91	0.798458	4960	4960	79.561	MS2	24/68
	NELSASELAAAEAFLSGR	14	9	CID		47.2359	2.48164	0	1	2	1835.91	-0.347764	6034	6034	95.509	MS2	16/34
	NNLTLQImDNNSImAEAEK	6	2	CID	M8(Oxidation) M14(Oxidation)	45.6035	2.26997	0	1	2	2181.02	4.72239	6162	6162	97.7763	MS2	12/36
	ADEEPVEETPAEPEVPQVETEK	7	2	CID		38.071	2.07264	0	1	2	2452.12	-1.98683	2155	2155	48.8546	MS2	13/42
	NNLTLQImDNNSImAEAEK	6	2	CID	M8(Oxidation) M14(Oxidation)	29.8555	1.42217	0	1	2	2181.02	1.06028	6281	6281	100.785	MS2	14/36
	ADEEPVEETPAEPEVPQVETEK	7	2	CID		62.7022	1.41563	0	1	2	2452.13	0.698721	1883	1883	45.83	MS2	14/42
	TENLTPDEVSK	18	10	CID		19.0731	1.3754	0	1	2	1232.6	-0.762256	734	734	32.6623	MS2	7/20
	YYVEHPDERPHSNDGWGNASEHVLGK	7	2	CID		16.3006	1.30975	0	1	6	2993.36	2.47613	1826	1826	45.1721	MS2	41/250
	GVAVPHGDHYHFIPYSQmSELEER	7	3	CID	M18(Oxidation)	22.9422	1.29893	0	1	3	2814.29	-4.67344	2429	2429	51.7843	MS2	15/92
	ADEEPVEETPAEPEVPQVETEK	7	2	CID		21.4206	1.22997	0	1	2	2452.13	0.45458	2443	2443	51.9766	MS2	10/42
	NNLTLQImDNNSImAEAEK	6	2	CID	M8(Oxidation) M14(Oxidation)	9.93303	1.19423	0	1	2	2181.02	2.52513	2966	2966	57.5405	MS2	10/36
	NNLTLQImDNNSImAEAEK	6	2	CID	M8(Oxidation) M14(Oxidation)	38.5474	1.09493	0	1	2	2181.02	-0.648701	5901	5901	93.4948	MS2	7/36
	VGEGYVFEEK	7	2	CID		19.6707	1.08916	0	1	2	1156.55	-2.27901	1852	1852	45.4982	MS2	11/18
	SnHWVPDSRPEQPSPQPTPEPSPGPQPAPnLK	5	1	CID	N2(Deamidated) N30(Deamidated)	5.46372	0.935448	0	1	4	3470.64	-25.8966	4945	4945	79.3581	MS2	20/186
	EKLVDDLLAFLAPITHPER	7	2	CID		6.81798	0.922076	0.495029	2	4	2177.2	-1.38016	5542	5542	87.748	MS2	22/108
	HVESDGLVFDPAQITSR	12	5	CID		4.2249	0.861097	0.0543606	2	3	1870.93	2.28451	3438	3438	62.5933	MS2	15/64
	NDGAVALARSqGR	12	5	CID	Q11(Deamidated)	16.0131	0.813382	0	1	2	1315.68	4.20741	1685	1685	43.6765	MS2	7/24
	NNLTLQImDNNSImAEAEK	6	2	CID	M8(Oxidation) M14(Oxidation)	12.5807	0.806457	0	1	2	2181.02	-0.404561	2393	2393	51.3751	MS2	9/36
	LPYmVEHTVEVK	7	2	CID	M4(Oxidation)	13.6876	0.760306	0	1	3	1460.75	-0.0713371	1600	1600	42.7144	MS2	11/44
	EKGILPPSPDADVK	7	2	CID		2.661	0.73597	0	1	3	1465.79	-0.857753	1440	1440	41.001	MS2	12/52
	YYVEHPDERPHSNDGWGnASEHVLGK	7	2	CID	N18(Deamidated)	13.8591	0.609576	0	1	3	2994.32	-18.1817	3581	3581	64.0653	MS2	11/100
	NELSASELAAAEAFLSGR	14	9	CID		14.3977	0.52376	0	1	2	1835.91	-0.958115	5653	5653	89.4393	MS2	6/34
gi182683947	21.1	30	834	24.2416	hypothetical protein SPCG_0977 [Streptococcus pneumoniae CGSP14]
	Sequence	# Proteins	# Protein Groups	Activation Type	Modifications	Probability	XCorr	Δ Score	Rank	Charge	MH+ [Da]	ΔM [ppm]	First Scan	Last Scan	RT [min]	MSOrder	Ions Matched	Annotation
	NELSASELAAAEAYWNGK	7	4	CID		102.669	3.78835	0	2	2	1923.91	0.723916	3804	3804	66.4619	MS2	22/34
	NELSASELAAAEAYWNGK	7	4	CID		68.5498	2.98649	0	2	2	1923.91	0.113564	5799	5799	91.863	MS2	14/34
	QVDFEALDNLLER	21	12	CID		82.2385	2.43183	0	1	2	1561.79	0.0729003	4767	4767	77.2139	MS2	18/24
	NELSASELAAAEAYWNGK	7	4	CID		31.6864	2.42758	0	2	2	1923.91	2.31083	4768	4768	77.2197	MS2	15/34
	VGDGYVFEENGVSR	17	12	CID		48.855	2.37985	0	1	2	1527.71	-0.158311	2118	2118	48.414	MS2	13/26
	NELSASELAAAEAYWNGK	7	4	CID		11.2081	2.28667	0	2	2	1923.91	-1.83956	6169	6169	97.9166	MS2	11/34
	NELSASELAAAEAYWNGK	7	4	CID		12.6549	2.20483	0	2	3	1923.91	1.07668	3854	3854	66.9698	MS2	16/68
	DLSAETAAGIDSK	21	12	CID		26.5528	2.11013	0	1	2	1277.62	-0.2696	1442	1442	41.0292	MS2	14/24
	LGKPNAQITYTDDEIQVAK	23	13	CID		43.4663	1.89176	0	1	2	2104.09	-0.805107	1978	1978	46.887	MS2	15/36
	DLSAETAAGIDSK	21	12	CID		36.9505	1.73408	0	1	2	1277.62	0.584892	6245	6245	99.7357	MS2	11/24
	DNNTISAEVDSLLALLK	13	7	CID		15.4173	1.70538	0	1	3	1815.97	0.693907	5524	5524	87.4989	MS2	22/64
	VGDGYVFEENGVSR	17	12	CID		32.7953	1.56321	0	1	2	1527.71	0.2079	1841	1841	45.3214	MS2	11/26
	VGDGYVFEENGVSR	17	12	CID		16.5469	1.42539	0	1	2	1527.71	-1.37901	2433	2433	51.8232	MS2	9/26
	DNNTISAEVDSLLALLKK	7	3	CID		11.1101	1.41173	0	1	2	1944.06	-0.268506	5429	5429	86.0182	MS2	9/34
	TDLPSSDREFYNK	24	14	CID		33.3388	1.33767	0	1	2	1571.74	7.21103	1344	1344	39.9646	MS2	12/24
	AYDLLAR	21	13	CID		31.1422	1.2945	0	1	2	821.454	2.72097	1705	1705	43.8712	MS2	10/12
	TDLPSSDREFYNK	24	14	CID		11.9494	1.26074	0	1	3	1571.73	-0.492851	1413	1413	40.7317	MS2	14/48
	NELSASELAAAEAYWNGK	7	4	CID		15.5672	1.21909	0	2	2	1923.91	-2.20577	5608	5608	88.8027	MS2	6/34
	DLSAETAAGIDSK	21	12	CID		16.2906	1.15982	0	1	2	1277.62	-0.51374	6337	6337	102.746	MS2	8/24
	GYTLEDLLATVK	20	13	CID		31.6484	0.863611	0	1	2	1322.72	-0.365068	4925	4925	79.146	MS2	6/22
	VGDGYVFEENGVSR	17	12	CID		15.1492	0.762354	0	1	2	1527.71	-1.50108	6396	6396	105.233	MS2	5/26
	DITSDEGDAYVTPHmTHSHWIK	25	15	CID	M15(Oxidation)	13.7074	0.751742	0	1	5	2556.15	0.913616	1911	1911	46.1575	MS2	29/168
	DSDIVNEIK	15	8	CID		7.72277	0.724031	0	1	2	1032.52	0.456533	1228	1228	38.6662	MS2	6/16
	DITSDEGDAYVTPHmTHSHWIK	25	15	CID	M15(Oxidation)	3.65572	0.595476	0.203806	2	4	2556.15	1.04913	1797	1797	44.8656	MS2	23/126
	DLSAETAAGIDSK	21	12	CID		13.4342	0.561454	0	1	2	1277.62	-0.39167	3101	3101	59.0245	MS2	5/24
	EEIKRqKqEHSHnHNSR	1	1	CID	Q6(Deamidated) Q8(Deamidated) N13(Deamidated)	4.69123	0.527341	0	1	2	2160	-18.9224	4620	4620	75.5357	MS2	4/32
	KTDLPSSDREFYNK	24	14	CID		46.4006	0.517171	0	1	3	1699.83	-0.370077	1091	1091	37.2409	MS2	15/52
	VGDGYVFEENGVSR	17	12	CID		2.07344	0.474028	0	1	2	1527.71	-1.37901	2852	2852	56.3826	MS2	5/26
	EEIKRQKqEHSHnHnSR	1	1	CID	Q8(Deamidated) N13(Deamidated) N15(Deamidated)	4.69123	0.471121	0.10661	4	2	2160	-18.9224	4620	4620	75.5357	MS2	4/32
	DLSAETAAGIDSK	21	12	CID		7.89403	0.414568	0	1	2	1277.62	0.951103	6479	6479	108.866	MS2	5/24
gi15900876	21.45	28	839	24.2416	hypothetical protein SP_1003 [Streptococcus pneumoniae TIGR4]
	Sequence	# Proteins	# Protein Groups	Activation Type	Modifications	Probability	XCorr	Δ Score	Rank	Charge	MH+ [Da]	ΔM [ppm]	First Scan	Last Scan	RT [min]	MSOrder	Ions Matched	Annotation
	NELSASELAAAEAYWNGK	7	4	CID		102.669	3.78835	0	2	2	1923.91	0.723916	3804	3804	66.4619	MS2	22/34
	NELSASELAAAEAYWNGK	7	4	CID		68.5498	2.98649	0	2	2	1923.91	0.113564	5799	5799	91.863	MS2	14/34
	QVDFEALDNLLER	21	12	CID		82.2385	2.43183	0	1	2	1561.79	0.0729003	4767	4767	77.2139	MS2	18/24
	NELSASELAAAEAYWNGK	7	4	CID		31.6864	2.42758	0	2	2	1923.91	2.31083	4768	4768	77.2197	MS2	15/34
	VGDGYVFEENGVSR	17	12	CID		48.855	2.37985	0	1	2	1527.71	-0.158311	2118	2118	48.414	MS2	13/26
	NELSASELAAAEAYWNGK	7	4	CID		11.2081	2.28667	0	2	2	1923.91	-1.83956	6169	6169	97.9166	MS2	11/34
	NELSASELAAAEAYWNGK	7	4	CID		12.6549	2.20483	0	2	3	1923.91	1.07668	3854	3854	66.9698	MS2	16/68
	DLSAETAAGIDSK	21	12	CID		26.5528	2.11013	0	1	2	1277.62	-0.2696	1442	1442	41.0292	MS2	14/24
	LGKPNAQITYTDDEIQVAK	23	13	CID		43.4663	1.89176	0	1	2	2104.09	-0.805107	1978	1978	46.887	MS2	15/36
	DLSAETAAGIDSK	21	12	CID		36.9505	1.73408	0	1	2	1277.62	0.584892	6245	6245	99.7357	MS2	11/24
	DNNTISAEVDSLLALLK	13	7	CID		15.4173	1.70538	0	1	3	1815.97	0.693907	5524	5524	87.4989	MS2	22/64
	VGDGYVFEENGVSR	17	12	CID		32.7953	1.56321	0	1	2	1527.71	0.2079	1841	1841	45.3214	MS2	11/26
	VGDGYVFEENGVSR	17	12	CID		16.5469	1.42539	0	1	2	1527.71	-1.37901	2433	2433	51.8232	MS2	9/26
	TDLPSSDREFYNK	24	14	CID		33.3388	1.33767	0	1	2	1571.74	7.21103	1344	1344	39.9646	MS2	12/24
	AYDLLAR	21	13	CID		31.1422	1.2945	0	1	2	821.454	2.72097	1705	1705	43.8712	MS2	10/12
	TDLPSSDREFYNK	24	14	CID		11.9494	1.26074	0	1	3	1571.73	-0.492851	1413	1413	40.7317	MS2	14/48
	NELSASELAAAEAYWNGK	7	4	CID		15.5672	1.21909	0	2	2	1923.91	-2.20577	5608	5608	88.8027	MS2	6/34
	DLSAETAAGIDSK	21	12	CID		16.2906	1.15982	0	1	2	1277.62	-0.51374	6337	6337	102.746	MS2	8/24
	GYTLEDLLATVK	20	13	CID		31.6484	0.863611	0	1	2	1322.72	-0.365068	4925	4925	79.146	MS2	6/22
	VGDGYVFEENGVSR	17	12	CID		15.1492	0.762354	0	1	2	1527.71	-1.50108	6396	6396	105.233	MS2	5/26
	DITSDEGDAYVTPHmTHSHWIK	25	15	CID	M15(Oxidation)	13.7074	0.751742	0	1	5	2556.15	0.913616	1911	1911	46.1575	MS2	29/168
	DSDIVNEIK	15	8	CID		7.72277	0.724031	0	1	2	1032.52	0.456533	1228	1228	38.6662	MS2	6/16
	DITSDEGDAYVTPHmTHSHWIK	25	15	CID	M15(Oxidation)	3.65572	0.595476	0.203806	2	4	2556.15	1.04913	1797	1797	44.8656	MS2	23/126
	DLSAETAAGIDSK	21	12	CID		13.4342	0.561454	0	1	2	1277.62	-0.39167	3101	3101	59.0245	MS2	5/24
	KTDLPSSDREFYNK	24	14	CID		46.4006	0.517171	0	1	3	1699.83	-0.370077	1091	1091	37.2409	MS2	15/52
	VGDGYVFEENGVSR	17	12	CID		2.07344	0.474028	0	1	2	1527.71	-1.37901	2852	2852	56.3826	MS2	5/26
	DLSAETAAGIDSK	21	12	CID		7.89403	0.414568	0	1	2	1277.62	0.951103	6479	6479	108.866	MS2	5/24
	QKQEHSHnHGGGSnDqAVVAAR	3	3	CID	N8(Deamidated) N14(Deamidated) Q16(Deamidated)	11.6467	0.407575	0.000531453	2	2	2330.05	0.0554081	2836	2836	56.1987	MS2	5/42
gi225860983	23.36	27	852	23.1202	pneumococcal histidine triad protein B [Streptococcus pneumoniae Taiwan19F-14]
	Sequence	# Proteins	# Protein Groups	Activation Type	Modifications	Probability	XCorr	Δ Score	Rank	Charge	MH+ [Da]	ΔM [ppm]	First Scan	Last Scan	RT [min]	MSOrder	Ions Matched	Annotation
	TNWVPSVSNPGTTNTNTSNNSNTNSQASQSNDIDSLLK	14	9	CID		47.5719	3.80185	0	1	3	4007.85	2.93428	3433	3433	62.548	MS2	30/148
	NELSASELAAAEAFLSGR	14	9	CID		90.2249	3.41329	0	1	2	1835.91	-0.225693	4878	4878	78.5281	MS2	20/34
	NELSASELAAAEAFLSGR	14	9	CID		33.8975	2.87578	0	1	3	1835.91	0.798458	4960	4960	79.561	MS2	24/68
	NELSASELAAAEAFLSGR	14	9	CID		47.2359	2.48164	0	1	2	1835.91	-0.347764	6034	6034	95.509	MS2	16/34
	QVDFEALDNLLER	21	12	CID		82.2385	2.43183	0	1	2	1561.79	0.0729003	4767	4767	77.2139	MS2	18/24
	VGDGYVFEENGVSR	17	12	CID		48.855	2.37985	0	1	2	1527.71	-0.158311	2118	2118	48.414	MS2	13/26
	DLSAETAAGIDSK	21	12	CID		26.5528	2.11013	0	1	2	1277.62	-0.2696	1442	1442	41.0292	MS2	14/24
	LGKPNAQITYTDDEIQVAK	23	13	CID		43.4663	1.89176	0	1	2	2104.09	-0.805107	1978	1978	46.887	MS2	15/36
	DLSAETAAGIDSK	21	12	CID		36.9505	1.73408	0	1	2	1277.62	0.584892	6245	6245	99.7357	MS2	11/24
	DNNTISAEVDSLLALLK	13	7	CID		15.4173	1.70538	0	1	3	1815.97	0.693907	5524	5524	87.4989	MS2	22/64
	VGDGYVFEENGVSR	17	12	CID		32.7953	1.56321	0	1	2	1527.71	0.2079	1841	1841	45.3214	MS2	11/26
	VGDGYVFEENGVSR	17	12	CID		16.5469	1.42539	0	1	2	1527.71	-1.37901	2433	2433	51.8232	MS2	9/26
	DNNTISAEVDSLLALLKK	7	3	CID		11.1101	1.41173	0	1	2	1944.06	-0.268506	5429	5429	86.0182	MS2	9/34
	TENLTPDEVSK	18	10	CID		19.0731	1.3754	0	1	2	1232.6	-0.762256	734	734	32.6623	MS2	7/20
	TDLPSSDREFYNK	24	14	CID		33.3388	1.33767	0	1	2	1571.74	7.21103	1344	1344	39.9646	MS2	12/24
	AYDLLAR	21	13	CID		31.1422	1.2945	0	1	2	821.454	2.72097	1705	1705	43.8712	MS2	10/12
	TDLPSSDREFYNK	24	14	CID		11.9494	1.26074	0	1	3	1571.73	-0.492851	1413	1413	40.7317	MS2	14/48
	DLSAETAAGIDSK	21	12	CID		16.2906	1.15982	0	1	2	1277.62	-0.51374	6337	6337	102.746	MS2	8/24
	GYTLEDLLATVK	20	13	CID		31.6484	0.863611	0	1	2	1322.72	-0.365068	4925	4925	79.146	MS2	6/22
	VGDGYVFEENGVSR	17	12	CID		15.1492	0.762354	0	1	2	1527.71	-1.50108	6396	6396	105.233	MS2	5/26
	DITSDEGDAYVTPHmTHSHWIK	25	15	CID	M15(Oxidation)	13.7074	0.751742	0	1	5	2556.15	0.913616	1911	1911	46.1575	MS2	29/168
	DITSDEGDAYVTPHmTHSHWIK	25	15	CID	M15(Oxidation)	3.65572	0.595476	0.203806	2	4	2556.15	1.04913	1797	1797	44.8656	MS2	23/126
	DLSAETAAGIDSK	21	12	CID		13.4342	0.561454	0	1	2	1277.62	-0.39167	3101	3101	59.0245	MS2	5/24
	NELSASELAAAEAFLSGR	14	9	CID		14.3977	0.52376	0	1	2	1835.91	-0.958115	5653	5653	89.4393	MS2	6/34
	KTDLPSSDREFYNK	24	14	CID		46.4006	0.517171	0	1	3	1699.83	-0.370077	1091	1091	37.2409	MS2	15/52
	VGDGYVFEENGVSR	17	12	CID		2.07344	0.474028	0	1	2	1527.71	-1.37901	2852	2852	56.3826	MS2	5/26
	DLSAETAAGIDSK	21	12	CID		7.89403	0.414568	0	1	2	1277.62	0.951103	6479	6479	108.866	MS2	5/24
gi307126945	30.4	20	398	22.7631	translation elongation factor Tu [Streptococcus pneumoniae 670-6B]
	Sequence	# Proteins	# Protein Groups	Activation Type	Modifications	Probability	XCorr	Δ Score	Rank	Charge	MH+ [Da]	ΔM [ppm]	First Scan	Last Scan	RT [min]	MSOrder	Ions Matched	Annotation
	YEDIVmELmNTVDEYIPEPER	2	1	CID	M6(Oxidation) M9(Oxidation)	82.6958	3.12847	0	1	2	2617.16	-3.68878	5393	5393	85.4847	MS2	18/40
	YEDIVmELmNTVDEYIPEPER	2	1	CID	M6(Oxidation) M9(Oxidation)	66.5942	3.05486	0	1	2	2617.17	-0.514951	5969	5969	94.5162	MS2	18/40
	YEDIVmELmNTVDEYIPEPER	2	1	CID	M6(Oxidation) M9(Oxidation)	77.9048	2.87576	0	1	2	2617.17	-0.02667	5777	5777	91.5059	MS2	17/40
	DTDKPLLLPVEDVFSITGR	2	1	CID		55.8	2.50126	0	1	2	2115.13	-2.90261	5924	5924	93.8475	MS2	14/36
	DTDKPLLLPVEDVFSITGR	2	1	CID		38.0754	2.2836	0	1	3	2115.13	0.501915	5945	5945	94.1664	MS2	20/72
	YEDIVmELmNTVDEYIPEPER	2	1	CID	M6(Oxidation) M9(Oxidation)	24.4329	2.0616	0	1	3	2617.17	4.78166	6003	6003	94.9532	MS2	17/80
	NmITGAAQmDGAILVVASTDGPmPQTR	2	1	CID	M2(Oxidation) M9(Oxidation) M23(Oxidation)	4.12979	1.89282	0	1	3	2793.32	-0.789296	6267	6267	100.392	MS2	20/104
	YEDIVmELmNTVDEYIPEPER	2	1	CID	M6(Oxidation) M9(Oxidation)	56.3991	1.76447	0	1	2	2617.17	4.612	6148	6148	97.5245	MS2	14/40
	VNDEIEIVGIKEETQK	2	1	CID		54.3906	1.73904	0	1	2	1843.97	0.6604	2441	2441	51.9494	MS2	12/30
	DTDKPLLLPVEDVFSITGR	2	1	CID		20.5876	1.69561	0	1	3	2115.13	1.41744	5759	5759	91.1546	MS2	18/72
	DLLSEYDFPGDDLPVIQGSALK	2	1	CID		44.9464	1.67998	0	1	2	2392.2	3.3988	4811	4811	77.7431	MS2	12/42
	GITINTAHVEYETEK	2	1	CID		71.7706	1.6741	0	1	2	1704.84	0.44665	1758	1758	44.4083	MS2	13/28
	VNDEIEIVGIK	2	1	CID		33.8146	1.59199	0	1	2	1228.68	-0.141045	2780	2780	55.5944	MS2	12/20
	YEDIVmELmNTVDEYIPEPER	2	1	CID	M6(Oxidation) M9(Oxidation)	52.2324	1.54888	0	1	2	2617.17	1.43817	5589	5589	88.4999	MS2	12/40
	GITINTAHVEYETEKR	2	1	CID		20.2846	1.41369	0	1	3	1860.95	0.631563	1591	1591	42.6464	MS2	15/60
	DLLSEYDFPGDDLPVIQGSALK	2	1	CID		16.3367	1.38676	0	1	2	2392.19	2.1781	5713	5713	90.4256	MS2	8/42
	NmITGAAQmDGAILVVASTDGPmPQTR	2	1	CID	M2(Oxidation) M9(Oxidation) M23(Oxidation)	5.31757	1.31644	0	1	3	2793.31	-9.94457	3218	3218	60.2873	MS2	19/104
	DLLSEYDFPGDDLPVIQGSALK	2	1	CID		9.08162	1.27975	0	1	2	2392.19	-0.507451	5235	5235	82.8998	MS2	12/42
	DLLSEYDFPGDDLPVIQGSALK	2	1	CID		22.9477	1.21885	0	1	2	2392.19	2.42224	5905	5905	93.5651	MS2	6/42
	NmITGAAQmDGAILVVASTDGPmPQTR	2	1	CID	M2(Oxidation) M9(Oxidation) M23(Oxidation)	10.2477	1.21186	0	1	2	2793.33	6.67044	2985	2985	57.7317	MS2	13/52
gi221231885	35.36	23	840	22.5117	streptococcal histidine triad protein PhpA [Streptococcus pneumoniae ATCC 700669]
	Sequence	# Proteins	# Protein Groups	Activation Type	Modifications	Probability	XCorr	Δ Score	Rank	Charge	MH+ [Da]	ΔM [ppm]	First Scan	Last Scan	RT [min]	MSOrder	Ions Matched	Annotation
	TNWVPSVSNPGTTNTNTSNNSNTNSQASQSNDIDSLLK	14	9	CID		47.5719	3.80185	0	1	3	4007.85	2.93428	3433	3433	62.548	MS2	30/148
	NELSASELAAAEAFLSGR	14	9	CID		90.2249	3.41329	0	1	2	1835.91	-0.225693	4878	4878	78.5281	MS2	20/34
	YYVEHPNERPHSDNGFGNASDHVQR	18	12	CID		86.581	3.02686	0	1	4	2925.3	-0.987586	974	974	35.7875	MS2	45/144
	NELSASELAAAEAFLSGR	14	9	CID		33.8975	2.87578	0	1	3	1835.91	0.798458	4960	4960	79.561	MS2	24/68
	EEKPQSEKPESPKPTEEPEEESPEESEEPQVETEK	5	5	CID		58.7926	2.56962	0	1	4	4051.82	0.645304	980	980	35.8595	MS2	38/204
	NELSASELAAAEAFLSGR	14	9	CID		47.2359	2.48164	0	1	2	1835.91	-0.347764	6034	6034	95.509	MS2	16/34
	EEKPQSEKPESPKPTEEPEEESPEESEEPQVETEKVEEK	5	5	CID		27.2498	2.45087	0	1	4	4537.07	8.15882	1161	1161	37.9314	MS2	36/228
	LGKPNAQITYTDDEIQVAK	23	13	CID		43.4663	1.89176	0	1	2	2104.09	-0.805107	1978	1978	46.887	MS2	15/36
	YYVEHPNERPHSDNGFGNASDHVQR	18	12	CID		27.6834	1.76761	0	1	3	2925.31	1.28416	982	982	35.8886	MS2	20/96
	TENLTPDEVSK	18	10	CID		19.0731	1.3754	0	1	2	1232.6	-0.762256	734	734	32.6623	MS2	7/20
	TDLPSSDREFYNK	24	14	CID		33.3388	1.33767	0	1	2	1571.74	7.21103	1344	1344	39.9646	MS2	12/24
	GVAVPHGDHYHFIPYSQmSELEER	7	3	CID	M18(Oxidation)	22.9422	1.29893	0	1	3	2814.29	-4.67344	2429	2429	51.7843	MS2	15/92
	AYDLLAR	21	13	CID		31.1422	1.2945	0	1	2	821.454	2.72097	1705	1705	43.8712	MS2	10/12
	TDLPSSDREFYNK	24	14	CID		11.9494	1.26074	0	1	3	1571.73	-0.492851	1413	1413	40.7317	MS2	14/48
	NGQADTNQTEKPSEEKPQTEKPEEETPR	5	4	CID		3.36368	0.887882	0	1	4	3197.48	0.0116325	510	510	28.4082	MS2	28/162
	GYTLEDLLATVK	20	13	CID		31.6484	0.863611	0	1	2	1322.72	-0.365068	4925	4925	79.146	MS2	6/22
	NDGAVALARSqGR	12	5	CID	Q11(Deamidated)	16.0131	0.813382	0	1	2	1315.68	4.20741	1685	1685	43.6765	MS2	7/24
	DITSDEGDAYVTPHmTHSHWIK	25	15	CID	M15(Oxidation)	13.7074	0.751742	0	1	5	2556.15	0.913616	1911	1911	46.1575	MS2	29/168
	qVDFEVLDNLLER	3	2	CID	Q1(Deamidated)	2.77115	0.73058	0	1	2	1590.82	15.2745	1780	1780	44.6571	MS2	7/24
	DITSDEGDAYVTPHmTHSHWIK	25	15	CID	M15(Oxidation)	3.65572	0.595476	0.203806	2	4	2556.15	1.04913	1797	1797	44.8656	MS2	23/126
	EEINRQKQEHSQYR	1	1	CID		7.61013	0.528559	0.495338	3	3	1844.89	-11.3894	1730	1730	44.1259	MS2	10/52
	NELSASELAAAEAFLSGR	14	9	CID		14.3977	0.52376	0	1	2	1835.91	-0.958115	5653	5653	89.4393	MS2	6/34
	KTDLPSSDREFYNK	24	14	CID		46.4006	0.517171	0	1	3	1699.83	-0.370077	1091	1091	37.2409	MS2	15/52
gi225856849	29.03	31	844	20.5042	pneumococcal histidine triad protein B [Streptococcus pneumoniae P1031]
	Sequence	# Proteins	# Protein Groups	Activation Type	Modifications	Probability	XCorr	Δ Score	Rank	Charge	MH+ [Da]	ΔM [ppm]	First Scan	Last Scan	RT [min]	MSOrder	Ions Matched	Annotation
	TNWVPSVSNPGTTNTNTSNNSNTNSQASQSNDIDSLLK	14	9	CID		47.5719	3.80185	0	1	3	4007.85	2.93428	3433	3433	62.548	MS2	30/148
	YYVEHPNERPHSDNGFGNASDHVQR	18	12	CID		86.581	3.02686	0	1	4	2925.3	-0.987586	974	974	35.7875	MS2	45/144
	SnHWVPDSRPEQPSPQPTPEPSPSPQPAPNPQPAPSNPIDEK	5	2	CID	N2(Deamidated)	13.6682	2.80025	0.0222042	3	4	4532.14	5.05845	1914	1914	46.1904	MS2	42/246
	SNHWVPDSRPEQPSPqPTPEPSPSPQPAPNPQPAPSNPIDEK	5	2	CID	Q16(Deamidated)	19.6073	2.79178	0.0251614	4	4	4532.14	5.05845	1914	1914	46.1904	MS2	43/246
	SNHWVPDSRPEqPSPQPTPEPSPSPQPAPNPQPAPSNPIDEK	5	2	CID	Q12(Deamidated)	13.6682	2.75193	0.0390773	6	4	4532.14	5.05845	1914	1914	46.1904	MS2	43/246
	SNHWVPDSRPEQPSPQPTPEPSPSPQPAPnPQPAPSNPIDEK	5	2	CID	N30(Deamidated)	26.0466	2.59538	0.09374	9	4	4532.14	5.05845	1914	1914	46.1904	MS2	41/246
	SNHWVPDSRPEqPSPQPTPEPSPSPQPAPNPQPAPSNPIDEK	5	2	CID	Q12(Deamidated)	6.31419	2.49036	0.0801684	5	4	4532.14	-1.77749	2194	2194	49.2329	MS2	35/246
	SNHWVPDSRPEQPSPqPTPEPSPSPQPAPNPQPAPSNPIDEK	5	2	CID	Q16(Deamidated)	11.7265	2.4663	0.0890544	6	4	4532.14	-1.77749	2194	2194	49.2329	MS2	34/246
	QVDFEALDNLLER	21	12	CID		82.2385	2.43183	0	1	2	1561.79	0.0729003	4767	4767	77.2139	MS2	18/24
	SNHWVPDSRPEQPSPQPTPEPSPSPQPAPnPQPAPSNPIDEK	5	2	CID	N30(Deamidated)	11.7265	2.22621	0.177735	9	4	4532.14	-1.77749	2194	2194	49.2329	MS2	34/246
	SNHWVPDSRPEQPSPQPTPEPSPSPqPAPNPQPAPSNPIDEK	5	2	CID	Q26(Deamidated)	17.951	2.22209	0.179257	10	4	4532.14	-1.77749	2194	2194	49.2329	MS2	34/246
	DLSAETAAGIDSK	21	12	CID		26.5528	2.11013	0	1	2	1277.62	-0.2696	1442	1442	41.0292	MS2	14/24
	LGKPNAQITYTDDEIQVAK	23	13	CID		43.4663	1.89176	0	1	2	2104.09	-0.805107	1978	1978	46.887	MS2	15/36
	YYVEHPNERPHSDNGFGNASDHVQR	18	12	CID		27.6834	1.76761	0	1	3	2925.31	1.28416	982	982	35.8886	MS2	20/96
	DLSAETAAGIDSK	21	12	CID		36.9505	1.73408	0	1	2	1277.62	0.584892	6245	6245	99.7357	MS2	11/24
	NGQADTnQTEKPNEEKPQTEKPEEETPR	7	4	CID	N7(Deamidated)	9.16243	1.48033	0	1	5	3225.48	0.687655	589	589	30.1756	MS2	36/216
	NGQADTNqTEKPNEEKPQTEKPEEETPR	7	4	CID	Q8(Deamidated)	16.4481	1.47747	0.00193124	2	5	3225.48	0.687655	589	589	30.1756	MS2	36/216
	TENLTPDEVSK	18	10	CID		19.0731	1.3754	0	1	2	1232.6	-0.762256	734	734	32.6623	MS2	7/20
	NGQADTNQTEKPNEEKPqTEKPEEETPR	7	4	CID	Q18(Deamidated)	16.4481	1.34195	0.0934796	3	5	3225.48	0.687655	589	589	30.1756	MS2	33/216
	TDLPSSDREFYNK	24	14	CID		33.3388	1.33767	0	1	2	1571.74	7.21103	1344	1344	39.9646	MS2	12/24
	NGqADTNQTEKPNEEKPQTEKPEEETPR	7	4	CID	Q3(Deamidated)	3.41324	1.33026	0.101381	4	5	3225.48	0.687655	589	589	30.1756	MS2	35/216
	AYDLLAR	21	13	CID		31.1422	1.2945	0	1	2	821.454	2.72097	1705	1705	43.8712	MS2	10/12
	TDLPSSDREFYNK	24	14	CID		11.9494	1.26074	0	1	3	1571.73	-0.492851	1413	1413	40.7317	MS2	14/48
	NGQADTNQTEKPnEEKPQTEKPEEETPR	7	4	CID	N13(Deamidated)	16.4481	1.20735	0.18441	6	5	3225.48	0.687655	589	589	30.1756	MS2	36/216
	DLSAETAAGIDSK	21	12	CID		16.2906	1.15982	0	1	2	1277.62	-0.51374	6337	6337	102.746	MS2	8/24
	NDGAVALARSqGR	12	5	CID	Q11(Deamidated)	16.0131	0.813382	0	1	2	1315.68	4.20741	1685	1685	43.6765	MS2	7/24
	DITSDEGDAYVTPHmTHSHWIK	25	15	CID	M15(Oxidation)	13.7074	0.751742	0	1	5	2556.15	0.913616	1911	1911	46.1575	MS2	29/168
	DITSDEGDAYVTPHmTHSHWIK	25	15	CID	M15(Oxidation)	3.65572	0.595476	0.203806	2	4	2556.15	1.04913	1797	1797	44.8656	MS2	23/126
	DLSAETAAGIDSK	21	12	CID		13.4342	0.561454	0	1	2	1277.62	-0.39167	3101	3101	59.0245	MS2	5/24
	KTDLPSSDREFYNK	24	14	CID		46.4006	0.517171	0	1	3	1699.83	-0.370077	1091	1091	37.2409	MS2	15/52
	DLSAETAAGIDSK	21	12	CID		7.89403	0.414568	0	1	2	1277.62	0.951103	6479	6479	108.866	MS2	5/24
gi307126804	21.84	12	293	19.2463	fructose-1,6-bisphosphate aldolase, class II [Streptococcus pneumoniae 670-6B]
	Sequence	# Proteins	# Protein Groups	Activation Type	Modifications	Probability	XCorr	Δ Score	Rank	Charge	MH+ [Da]	ΔM [ppm]	First Scan	Last Scan	RT [min]	MSOrder	Ions Matched	Annotation
	GISVEAEVGTIGGEEDGIIGK	1	1	CID		133.482	3.55094	0	1	2	2030.03	0.901455	3681	3681	65.1611	MS2	23/40
	GISVEAEVGTIGGEEDGIIGK	1	1	CID		64.4151	2.98958	0	1	2	2030.03	0.901455	3967	3967	68.1886	MS2	22/40
	GISVEAEVGTIGGEEDGIIGK	1	1	CID		42.2648	2.73209	0	1	2	2030.03	0.0469628	5784	5784	91.6068	MS2	15/40
	GISVEAEVGTIGGEEDGIIGK	1	1	CID		35.1259	2.40197	0	1	2	2030.03	2.48837	5597	5597	88.5898	MS2	15/40
	GISVEAEVGTIGGEEDGIIGK	1	1	CID		36.3125	2.09401	0	1	2	2030.03	1.63388	4738	4738	76.9092	MS2	12/40
	GISVEAEVGTIGGEEDGIIGK	1	1	CID		49.601	1.96522	0	1	2	2030.03	1.63388	5982	5982	94.6348	MS2	15/40
	GISVEAEVGTIGGEEDGIIGK	1	1	CID		45.5102	1.88695	0	1	2	2030.04	6.51669	4233	4233	71.2358	MS2	18/40
	GISVEAEVGTIGGEEDGIIGK	1	1	CID		11.8399	1.62554	0	1	2	2030.03	0.535244	5010	5010	80.2325	MS2	13/40
	DNGYAVGGFNTNNLEWTQAILR	1	1	CID		20.8093	1.4527	0	1	2	2453.18	-4.53206	4750	4750	77.0318	MS2	8/42
	GISVEAEVGTIGGEEDGIIGK	1	1	CID		15.7235	1.35877	0	1	2	2030.03	2.12216	6158	6158	97.7067	MS2	14/40
	GISVEAEVGTIGGEEDGIIGK	1	1	CID		4.55503	0.926665	0	1	2	2030.03	3.34286	6279	6279	100.731	MS2	8/40
	LGVAKVNVnTECqIAFANATR	1	1	CID	N9(Deamidated) Q13(Deamidated)	3.03478	0.501235	0.508452	3	3	2221.14	11.3683	3970	3970	68.2218	MS2	12/80
gi307128472	27.47	10	182	18.988	ribosome-associated factor Y [Streptococcus pneumoniae 670-6B]
	Sequence	# Proteins	# Protein Groups	Activation Type	Modifications	Probability	XCorr	Δ Score	Rank	Charge	MH+ [Da]	ΔM [ppm]	First Scan	Last Scan	RT [min]	MSOrder	Ions Matched	Annotation
	AEDVSQDmYGSIDLVTDK	4	1	CID	M8(Oxidation)	114.911	3.66207	0	1	2	2001.89	-1.01331	2642	2642	54.0446	MS2	17/34
	AEDVSQDmYGSIDLVTDK	4	1	CID	M8(Oxidation)	27.6725	3.04488	0	1	2	2001.9	1.67224	5871	5871	92.9128	MS2	11/34
	AEDVSQDmYGSIDLVTDK	4	1	CID	M8(Oxidation)	41.1258	2.91429	0	1	2	2001.9	4.60192	3330	3330	61.4377	MS2	17/34
	AEDVSQDmYGSIDLVTDK	4	1	CID	M8(Oxidation)	49.2896	2.71419	0	1	2	2001.91	11.4379	2339	2339	50.7494	MS2	13/34
	AEDVSQDmYGSIDLVTDK	4	1	CID	M8(Oxidation)	40.6427	2.56719	0	1	2	2001.9	0.451533	5678	5678	89.8118	MS2	14/34
	AEDVSQDmYGSIDLVTDK	4	1	CID	M8(Oxidation)	47.3394	2.31108	0	1	2	2001.9	-0.402959	6164	6164	97.8104	MS2	12/34
	VATGQLFTDALVEDSNVVQSK	2	1	CID		25.0883	1.77424	0	1	2	2221.13	-0.446358	3973	3973	68.2554	MS2	15/40
	GENLEVTEAIR	4	1	CID		27.1314	1.44198	0	1	2	1230.63	-0.515693	2005	2005	47.1499	MS2	11/20
	AEDVSQDmYGSIDLVTDK	4	1	CID	M8(Oxidation)	16.135	1.0856	0	1	2	2001.89	-1.25745	6284	6284	100.892	MS2	10/34
	VATGQLFTDALVEDSNVVQSK	2	1	CID		9.40708	0.547788	0.462798	2	3	2221.14	4.85025	3970	3970	68.2218	MS2	17/80
gi225858339	26.13	16	398	18.9017	phosphoglycerate kinase [Streptococcus pneumoniae 70585]
	Sequence	# Proteins	# Protein Groups	Activation Type	Modifications	Probability	XCorr	Δ Score	Rank	Charge	MH+ [Da]	ΔM [ppm]	First Scan	Last Scan	RT [min]	MSOrder	Ions Matched	Annotation
	GAELEAAINALEDGQVLLVENTR	4	1	CID		75.8974	3.90433	0	1	2	2425.26	1.30708	5378	5378	85.3048	MS2	24/44
	GAELEAAINALEDGQVLLVENTR	4	1	CID		28.285	3.08073	0	1	3	2425.26	1.2326	5767	5767	91.3277	MS2	18/88
	DTEGEAVSEGFLGLDIGPK	5	1	CID		45.1926	2.97501	0	1	2	1933.94	5.34224	4672	4672	76.136	MS2	14/36
	AQGIEIGNSLVEEDKLDVAK	5	1	CID		77.2621	2.94579	0	1	2	2128.11	0.739971	2990	2990	57.7927	MS2	19/38
	TVVWNGPmGVFENPDFQTGTIGVmDAIVK	1	1	CID	M8(Oxidation) M24(Oxidation)	10.2337	2.34127	0	1	3	3154.52	0.849317	4588	4588	75.1959	MS2	21/112
	GAELEAAINALEDGQVLLVENTR	4	1	CID		5.29944	1.87123	0	1	3	2425.26	-0.232245	5954	5954	94.3393	MS2	20/88
	DTEGEAVSEGFLGLDIGPK	5	1	CID		22.3468	1.82976	0	1	2	1933.94	4.97603	6203	6203	98.5508	MS2	15/36
	GAELEAAINALEDGQVLLVENTR	4	1	CID		6.29314	1.82741	0	1	3	2425.26	2.88055	6153	6153	97.6386	MS2	17/88
	DTEGEAVSEGFLGLDIGPK	5	1	CID		9.31125	1.82486	0	1	2	1933.94	1.68013	5842	5842	92.5126	MS2	8/36
	DTEGEAVSEGFLGLDIGPK	5	1	CID		8.00369	1.46164	0	1	2	1933.94	2.41255	4929	4929	79.1851	MS2	9/36
	AQGIEIGNSLVEEDKLDVAK	5	1	CID		4.78846	0.840031	0	1	3	2128.11	-0.98246	5476	5476	86.6285	MS2	12/76
	GAELEAAINALEDGQVLLVENTR	4	1	CID		10.8599	0.689336	0.413745	3	3	2425.26	-0.0491398	5372	5372	85.2348	MS2	15/88
	AQGIEIGNSLVEEDKLDVAK	5	1	CID		4.50288	0.617697	0.150296	2	3	2128.11	-1.34867	5859	5859	92.7412	MS2	12/76
	AQGIEIGNSLVEEDKLDVAK	5	1	CID		4.30448	0.581324	0	1	3	2128.11	-2.4473	6271	6271	100.457	MS2	12/76
	IGVIENLLEKADK	4	1	CID		3.26324	0.443012	0.138602	2	3	1441.83	8.35551	3851	3851	66.9368	MS2	9/48
	AQGIEIGNSLVEEDKLDVAK	5	1	CID		3.43859	0.442649	0.114856	2	3	2128.11	-0.433144	5667	5667	89.6542	MS2	10/76
gi225858492	15.78	23	1895	18.0664	zinc metalloprotease ZmpB [Streptococcus pneumoniae 70585]
	Sequence	# Proteins	# Protein Groups	Activation Type	Modifications	Probability	XCorr	Δ Score	Rank	Charge	MH+ [Da]	ΔM [ppm]	First Scan	Last Scan	RT [min]	MSOrder	Ions Matched	Annotation
	VEEGKEDSAEPAPVEEVGGEVESKPEEK	10	9	CID		114.407	4.07071	0	1	3	2983.39	-2.67184	1628	1628	43.036	MS2	30/108
	VPEQPVQPTQAEQPSTPK	3	3	CID		85.2063	3.10363	0	1	2	1961	0.685244	905	905	34.9426	MS2	17/34
	TIGGVETDQVLSTSTEVTK	1	1	CID		88.8298	2.70598	0	1	2	1965	2.10083	2362	2362	50.9912	MS2	17/36
	NYNEAmmmLDYAEAEAVLPK	2	1	CID	M6(Oxidation) M7(Oxidation) M8(Oxidation)	77.9498	2.55351	0	1	2	2351.02	0.101221	3490	3490	63.1768	MS2	17/38
	DmGITADTFEVTEHLVDK	2	1	CID	M2(Oxidation)	84.4791	2.07331	0	1	2	2036.94	-5.66382	3806	3806	66.4741	MS2	14/34
	GNGEETEILEDKEVQLDLK	2	1	CID		26.4443	1.95291	0	1	2	2159.08	4.70817	2937	2937	57.2751	MS2	12/36
	IKDmGITADTFEVTEHLVDK	2	1	CID	M4(Oxidation)	34.8902	1.89595	0	1	3	2278.13	-1.91697	3546	3546	63.7247	MS2	21/76
	DmGITADTFEVTEHLVDK	2	1	CID	M2(Oxidation)	4.51823	1.6186	0	1	3	2036.95	-0.611347	3752	3752	65.9465	MS2	16/68
	VTEGTLVEESTTELDYK	2	1	CID		26.4898	1.60638	0	1	2	1913.93	4.12411	3021	3021	58.152	MS2	5/32
	VDENGNETDSSLLETVPENLTSYYLK	2	1	CID		4.94761	1.56384	0.0666667	3	3	2930.38	-1.61678	4748	4748	77.0195	MS2	18/100
	GNDFITDLTDADHImVHYADK	2	1	CID	M15(Oxidation)	8.1439	1.49597	0	1	3	2407.09	1.91815	3866	3866	67.0884	MS2	18/80
	GTQEEDYVGEALVPEQLPEYK	2	1	CID		36.0135	1.3496	0	1	2	2394.14	4.38645	3600	3600	64.2885	MS2	12/40
	VTEGTLVEESTTELDYK	2	1	CID		50.9557	1.19324	0	1	2	1913.92	1.80478	6214	6214	98.702	MS2	9/32
	LFTNETDInVWFK	3	2	CID	N9(Deamidated)	23.0494	1.17181	0	1	2	1627.79	-9.37615	1339	1339	39.902	MS2	8/24
	EVTVEENNLQATLDNLK	2	1	CID		18.1823	1.02894	0	1	2	1929.98	1.49157	3557	3557	63.8349	MS2	9/32
	EDSAEPAPVEEVGGEVESKPEEK	10	9	CID		12.9099	0.893118	0.0803124	2	3	2441.12	-2.93654	1727	1727	44.0931	MS2	13/88
	EWIVNqGnKLTTDSPLmNK	2	1	CID	Q6(Deamidated) N8(Deamidated) M17(Oxidation)	2.27189	0.863166	0	1	2	2206.08	6.00289	1970	1970	46.7943	MS2	8/36
	EWIVnQGnKLTTDSPLmNK	2	1	CID	N5(Deamidated) N8(Deamidated) M17(Oxidation)	2.27189	0.861294	0.0021689	2	2	2206.08	6.00289	1970	1970	46.7943	MS2	8/36
	DLTELNDSSIKDK	2	1	CID		2.64527	0.84799	0	1	3	1477.74	0.448243	1427	1427	40.8621	MS2	12/48
	HFSIHnTARPLFDR	2	1	CID	N6(Deamidated)	3.13503	0.82922	0	1	3	1711.86	-1.84119	2634	2634	53.9715	MS2	11/52
	GTRqVTQEGVnDKK	2	1	CID	Q4(Deamidated) N11(Deamidated)	2.31705	0.778705	0.679787	2	2	1561.79	4.1009	4767	4767	77.2139	MS2	7/26
	EWIVnqGNKLTTDSPLmNK	2	1	CID	N5(Deamidated) Q6(Deamidated) M17(Oxidation)	2.27189	0.693636	0.196405	3	2	2206.08	6.00289	1970	1970	46.7943	MS2	7/36
	GTRqVTqEGVNDKK	2	1	CID	Q4(Deamidated) Q7(Deamidated)	2.31705	0.671463	0.723886	3	2	1561.79	4.1009	4767	4767	77.2139	MS2	6/26
gi225859275	25.41	8	551	17.3737	aminodeoxychorismate lyase [Streptococcus pneumoniae 70585]
	Sequence	# Proteins	# Protein Groups	Activation Type	Modifications	Probability	XCorr	Δ Score	Rank	Charge	MH+ [Da]	ΔM [ppm]	First Scan	Last Scan	RT [min]	MSOrder	Ions Matched	Annotation
	NVGLmPGPVDSPSLDAIESSINQTK	12	1	CID	M5(Oxidation)	62.1283	2.97621	0	1	2	2585.28	0.690908	3933	3933	67.8365	MS2	12/48
	KAEQAGPETPTPAIETVDIIR	1	1	CID		70.9439	2.75134	0	1	2	2236.18	2.05833	2980	2980	57.6868	MS2	16/40
	KAPTVPTHPSQGVPASPADEIQR	11	1	CID		35.9566	2.67273	0	1	3	2383.24	0.472364	1483	1483	41.474	MS2	26/88
	GYDEVLKEDEAVVR	12	1	CID		98.4622	2.58229	0	1	2	1621.81	-0.305147	2338	2338	50.7435	MS2	17/26
	TPANEPSAEELmADSLSTVEEImR	8	1	CID	M12(Oxidation) M23(Oxidation)	156.536	2.36784	0	1	2	2652.2	-0.431826	3772	3772	66.1444	MS2	19/46
	KAEQAGPETPTPAIETVDIIR	1	1	CID		75.0811	2.13856	0	1	3	2236.18	1.12936	3045	3045	58.422	MS2	25/80
	AEQAGPETPTPAIETVDIIR	1	1	CID		64.0398	1.88474	0	1	2	2108.09	-1.1162	3213	3213	60.2262	MS2	15/38
	ETPGVPSHPSQDVPSSPAEESGSRPGPGPVRPK	12	1	CID		67.1995	1.29147	0	1	5	3319.63	2.96674	1216	1216	38.5655	MS2	42/256
gi169834040	27.09	33	849	17.1904	pneumococcal histidine triad protein B [Streptococcus pneumoniae Hungary19A-6]
	Sequence	# Proteins	# Protein Groups	Activation Type	Modifications	Probability	XCorr	Δ Score	Rank	Charge	MH+ [Da]	ΔM [ppm]	First Scan	Last Scan	RT [min]	MSOrder	Ions Matched	Annotation
	YYVEHPNERPHSDNGFGNASDHVQR	18	12	CID		86.581	3.02686	0	1	4	2925.3	-0.987586	974	974	35.7875	MS2	45/144
	SnHWVPDSRPEQPSPQPTPEPSPSPQPAPNPQPAPSNPIDEK	5	2	CID	N2(Deamidated)	13.6682	2.80025	0.0222042	3	4	4532.14	5.05845	1914	1914	46.1904	MS2	42/246
	SNHWVPDSRPEQPSPqPTPEPSPSPQPAPNPQPAPSNPIDEK	5	2	CID	Q16(Deamidated)	19.6073	2.79178	0.0251614	4	4	4532.14	5.05845	1914	1914	46.1904	MS2	43/246
	SNHWVPDSRPEqPSPQPTPEPSPSPQPAPNPQPAPSNPIDEK	5	2	CID	Q12(Deamidated)	13.6682	2.75193	0.0390773	6	4	4532.14	5.05845	1914	1914	46.1904	MS2	43/246
	SNHWVPDSRPEQPSPQPTPEPSPSPQPAPnPQPAPSNPIDEK	5	2	CID	N30(Deamidated)	26.0466	2.59538	0.09374	9	4	4532.14	5.05845	1914	1914	46.1904	MS2	41/246
	SNHWVPDSRPEqPSPQPTPEPSPSPQPAPNPQPAPSNPIDEK	5	2	CID	Q12(Deamidated)	6.31419	2.49036	0.0801684	5	4	4532.14	-1.77749	2194	2194	49.2329	MS2	35/246
	SNHWVPDSRPEQPSPqPTPEPSPSPQPAPNPQPAPSNPIDEK	5	2	CID	Q16(Deamidated)	11.7265	2.4663	0.0890544	6	4	4532.14	-1.77749	2194	2194	49.2329	MS2	34/246
	QVDFEALDNLLER	21	12	CID		82.2385	2.43183	0	1	2	1561.79	0.0729003	4767	4767	77.2139	MS2	18/24
	VGDGYVFEENGVSR	17	12	CID		48.855	2.37985	0	1	2	1527.71	-0.158311	2118	2118	48.414	MS2	13/26
	SNHWVPDSRPEQPSPQPTPEPSPSPQPAPnPQPAPSNPIDEK	5	2	CID	N30(Deamidated)	11.7265	2.22621	0.177735	9	4	4532.14	-1.77749	2194	2194	49.2329	MS2	34/246
	SNHWVPDSRPEQPSPQPTPEPSPSPqPAPNPQPAPSNPIDEK	5	2	CID	Q26(Deamidated)	17.951	2.22209	0.179257	10	4	4532.14	-1.77749	2194	2194	49.2329	MS2	34/246
	DLSAETAAGIDSK	21	12	CID		26.5528	2.11013	0	1	2	1277.62	-0.2696	1442	1442	41.0292	MS2	14/24
	YYVEHPNERPHSDNGFGNASDHVQR	18	12	CID		27.6834	1.76761	0	1	3	2925.31	1.28416	982	982	35.8886	MS2	20/96
	DLSAETAAGIDSK	21	12	CID		36.9505	1.73408	0	1	2	1277.62	0.584892	6245	6245	99.7357	MS2	11/24
	DNNTISAEVDSLLALLK	13	7	CID		15.4173	1.70538	0	1	3	1815.97	0.693907	5524	5524	87.4989	MS2	22/64
	VGDGYVFEENGVSR	17	12	CID		32.7953	1.56321	0	1	2	1527.71	0.2079	1841	1841	45.3214	MS2	11/26
	VGDGYVFEENGVSR	17	12	CID		16.5469	1.42539	0	1	2	1527.71	-1.37901	2433	2433	51.8232	MS2	9/26
	TDLPSSDREFYNK	24	14	CID		33.3388	1.33767	0	1	2	1571.74	7.21103	1344	1344	39.9646	MS2	12/24
	AYDLLAR	21	13	CID		31.1422	1.2945	0	1	2	821.454	2.72097	1705	1705	43.8712	MS2	10/12
	IAEAEALLEK	5	3	CID		15.8179	1.28914	0	1	2	1086.6	-0.373936	2201	2201	49.2902	MS2	11/18
	TDLPSSDREFYNK	24	14	CID		11.9494	1.26074	0	1	3	1571.73	-0.492851	1413	1413	40.7317	MS2	14/48
	DLSAETAAGIDSK	21	12	CID		16.2906	1.15982	0	1	2	1277.62	-0.51374	6337	6337	102.746	MS2	8/24
	GYTLEDLLATVK	20	13	CID		31.6484	0.863611	0	1	2	1322.72	-0.365068	4925	4925	79.146	MS2	6/22
	VGDGYVFEENGVSR	17	12	CID		15.1492	0.762354	0	1	2	1527.71	-1.50108	6396	6396	105.233	MS2	5/26
	DITSDEGDAYVTPHmTHSHWIK	25	15	CID	M15(Oxidation)	13.7074	0.751742	0	1	5	2556.15	0.913616	1911	1911	46.1575	MS2	29/168
	DSDIVNEIK	15	8	CID		7.72277	0.724031	0	1	2	1032.52	0.456533	1228	1228	38.6662	MS2	6/16
	VNGKYYVYLK	7	5	CID		10.5302	0.720905	0.537294	2	3	1246.69	7.3515	2830	2830	56.1346	MS2	7/36
	DITSDEGDAYVTPHmTHSHWIK	25	15	CID	M15(Oxidation)	3.65572	0.595476	0.203806	2	4	2556.15	1.04913	1797	1797	44.8656	MS2	23/126
	DLSAETAAGIDSK	21	12	CID		13.4342	0.561454	0	1	2	1277.62	-0.39167	3101	3101	59.0245	MS2	5/24
	KTDLPSSDREFYNK	24	14	CID		46.4006	0.517171	0	1	3	1699.83	-0.370077	1091	1091	37.2409	MS2	15/52
	VGDGYVFEENGVSR	17	12	CID		2.07344	0.474028	0	1	2	1527.71	-1.37901	2852	2852	56.3826	MS2	5/26
	DLSAETAAGIDSK	21	12	CID		7.89403	0.414568	0	1	2	1277.62	0.951103	6479	6479	108.866	MS2	5/24
	QKQEHSHnHGGGSnDqAVVAAR	3	3	CID	N8(Deamidated) N14(Deamidated) Q16(Deamidated)	11.6467	0.407575	0.000531453	2	2	2330.05	0.0554081	2836	2836	56.1987	MS2	5/42
gi225861095	12.08	19	2004	15.1824	immunoglobulin A1 protease [Streptococcus pneumoniae Taiwan19F-14]
	Sequence	# Proteins	# Protein Groups	Activation Type	Modifications	Probability	XCorr	Δ Score	Rank	Charge	MH+ [Da]	ΔM [ppm]	First Scan	Last Scan	RT [min]	MSOrder	Ions Matched	Annotation
	DVQSGAIVEPAIQPELPEAVVSDK	8	6	CID		73.8347	2.97021	0	2	2	2491.29	1.71989	3494	3494	63.2168	MS2	17/46
	DGAITYTHEmTHDSDQDIYLGGYGR	7	5	CID	M10(Oxidation)	49.8301	2.80427	0	1	3	2831.22	3.28826	2154	2154	48.8486	MS2	28/96
	DVYIPVASITEEK	4	3	CID		59.3791	2.40036	0	1	2	1463.76	-0.72874	2987	2987	57.7592	MS2	17/24
	DnQVITDIVSNK	2	2	CID	N2(Deamidated)	44.9235	2.38849	0	1	2	1346.68	-0.122201	2448	2448	52.036	MS2	15/22
	IDFQEEIQENPDLAEGTVR	9	6	CID		27.0511	2.32569	0	1	2	2203.05	0.364111	3046	3046	58.4282	MS2	16/36
	DNqVITDIVSNK	2	2	CID	Q3(Deamidated)	44.9235	2.3155	0.0305592	3	2	1346.68	-0.122201	2448	2448	52.036	MS2	15/22
	DVQSGAIVEPAIQPELPEAVVSDK	8	6	CID		24.5243	2.29335	0	2	2	2491.29	-1.20979	3782	3782	66.2355	MS2	14/46
	IDFQEEIQENPDLAEGTVR	9	6	CID		16.3221	1.93422	0	1	3	2203.05	0.472735	3244	3244	60.5507	MS2	22/72
	AINQNPSGTYHLAASLNANEVELGPDER	4	3	CID		36.7309	1.8924	0	1	3	2980.44	0.82254	3090	3090	58.9292	MS2	22/108
	TGVNTLNPQDEVLSGQLNKPELLYR	12	8	CID		10.5751	1.73555	0	1	3	2798.48	8.7957	3511	3511	63.3804	MS2	14/96
	TEEVPVKPTEETPVNPNEGTTEGTSIQEAENPVQPAEESTTNSEK	5	4	CID		22.8391	1.53787	0	1	4	4824.24	2.61788	2260	2260	49.9141	MS2	29/264
	DNQVITDIVSnK	2	2	CID	N11(Deamidated)	2.86283	1.18529	0.503747	4	2	1346.68	-0.122201	2448	2448	52.036	MS2	11/22
	GNIEQVKPETPVEK	7	5	CID		6.76548	1.12941	0	1	3	1567.83	-0.747968	886	886	34.6678	MS2	12/52
	TGVNTLNPQDEVLSGQLNKPELLYR	12	8	CID		4.18094	0.878502	0	1	3	2798.47	1.47149	4097	4097	69.6645	MS2	10/96
	GIGGLLAKAEqSSITESSFK	2	2	CID	Q11(Deamidated)	7.49473	0.854533	0	1	2	2024.06	4.76854	4142	4142	70.1599	MS2	7/38
	DGAITYTHEmTHDSDQDIYLGGYGR	7	5	CID	M10(Oxidation)	16.5737	0.840202	0	1	4	2831.22	-4.23251	2335	2335	50.7106	MS2	22/144
	GIGGLLAKAEQSSITESSFKGR	2	2	CID		4.64139	0.814719	0.703883	2	2	2236.18	-9.17167	2980	2980	57.6868	MS2	7/42
	ITAKAEKLqqELEnK	4	3	CID	Q9(Deamidated) Q10(Deamidated) N14(Deamidated)	2.64235	0.81096	0	1	3	1745.91	-7.8496	5151	5151	81.8791	MS2	9/56
	TGVNTLNPQDEVLSGQLNKPELLYR	12	8	CID		28.2259	0.564565	0	1	2	2798.47	6.00153	3537	3537	63.6416	MS2	11/48
gi307126489	18.9	13	693	15.0597	translation elongation factor G [Streptococcus pneumoniae 670-6B]
	Sequence	# Proteins	# Protein Groups	Activation Type	Modifications	Probability	XCorr	Δ Score	Rank	Charge	MH+ [Da]	ΔM [ppm]	First Scan	Last Scan	RT [min]	MSOrder	Ions Matched	Annotation
	GQFGDVWIEFTPNEEGK	6	1	CID		74.7564	3.61639	0	1	2	1952.9	-1.16651	4352	4352	72.5002	MS2	18/32
	VLDGAVTVLDSQSGVEPQTETVWR	6	1	CID		87.0986	3.40308	0	1	2	2586.31	1.00036	3632	3632	64.6048	MS2	17/46
	IGETHEGASQmDWmEQEQER	6	1	CID	M11(Oxidation) M14(Oxidation)	89.4751	3.12778	0	1	3	2422.99	-0.700741	949	949	35.4744	MS2	20/76
	IGETHEGASQmDWmEQEQER	6	1	CID	M11(Oxidation) M14(Oxidation)	32.4196	2.75756	0	1	3	2422.99	3.8769	1308	1308	39.5544	MS2	20/76
	GINPDTDAEETRPASDEEPFAALAFK	3	1	CID		54.2659	2.15491	0	1	3	2791.31	-0.346191	3893	3893	67.362	MS2	21/100
	LIEAVAETDEELmmK	3	1	CID	M13(Oxidation) M14(Oxidation)	48.632	1.55687	0	1	3	1753.82	0.894708	2678	2678	54.4433	MS2	18/56
	AEIYTNDLGTDILEEDIPAEYLDQAQEYR	6	1	CID		8.58725	1.34965	0	1	3	3387.56	-13.0844	4990	4990	79.9683	MS2	15/112
	IGETHEGASQmDWmEQEQER	6	1	CID	M11(Oxidation) M14(Oxidation)	32.2722	1.11772	0	1	2	2422.98	-4.83769	955	955	35.5542	MS2	9/38
	LIEAVAETDEELmmK	3	1	CID	M13(Oxidation) M14(Oxidation)	42.905	1.11136	0	1	2	1753.82	-4.52397	6191	6191	98.3131	MS2	5/28
	LIEAVAETDEELmmK	3	1	CID	M13(Oxidation) M14(Oxidation)	4.49993	0.879021	0	1	2	1753.82	-3.54741	5960	5960	94.4222	MS2	5/28
	GQFGDVWIEFTPNEEGK	6	1	CID		15.7181	0.778227	0.734173	2	2	1952.89	-14.4722	4997	4997	80.0427	MS2	8/32
	GINPDTDAEETRPASDEEPFAALAFK	3	1	CID		37.2832	0.686671	0	1	2	2791.31	4.73317	3731	3731	65.6783	MS2	9/50
	LIEAVAETDEELmmK	3	1	CID	M13(Oxidation) M14(Oxidation)	3.38167	0.503441	0	1	3	1753.82	-6.0633	4295	4295	71.8515	MS2	12/56
gi307126455	32.03	6	128	14.7095	50S ribosomal protein L17 [Streptococcus pneumoniae 670-6B]
	Sequence	# Proteins	# Protein Groups	Activation Type	Modifications	Probability	XCorr	Δ Score	Rank	Charge	MH+ [Da]	ΔM [ppm]	First Scan	Last Scan	RT [min]	MSOrder	Ions Matched	Annotation
	DLTTDLLINESIVTTEAR	2	1	CID		62.3393	3.38723	0	1	2	2004.05	-1.24386	4455	4455	73.6803	MS2	18/34
	NEIASENYDEATDKYTSTTALQK	2	1	CID		56.8187	2.57308	0	1	3	2592.19	0.139141	1817	1817	45.0749	MS2	25/88
	DLTTDLLINESIVTTEAR	2	1	CID		34.6071	2.27607	0	1	2	2004.05	0.831338	4728	4728	76.785	MS2	13/34
	NEIASENYDEATDKYTSTTALQK	2	1	CID		114.095	2.2435	0	1	2	2592.2	1.49536	1818	1818	45.0811	MS2	18/44
	NEIASENYDEATDKYTSTTALQK	2	1	CID		6.70173	2.11905	0	1	3	2592.2	1.05467	2091	2091	48.1109	MS2	16/88
	NEIASENYDEATDKYTSTTALQK	2	1	CID		3.60278	2.11054	0	1	3	2592.2	0.871563	6200	6200	98.4903	MS2	14/88
gi307127334	12.12	19	1963	14.6876	immunoglobulin A1 protease [Streptococcus pneumoniae 670-6B]
	Sequence	# Proteins	# Protein Groups	Activation Type	Modifications	Probability	XCorr	Δ Score	Rank	Charge	MH+ [Da]	ΔM [ppm]	First Scan	Last Scan	RT [min]	MSOrder	Ions Matched	Annotation
	DVQSGAIVEPAIQPELPEAVVSDK	8	6	CID		73.8347	2.97021	0	2	2	2491.29	1.71989	3494	3494	63.2168	MS2	17/46
	DGAITYTHEmTHDSDQDIYLGGYGR	7	5	CID	M10(Oxidation)	49.8301	2.80427	0	1	3	2831.22	3.28826	2154	2154	48.8486	MS2	28/96
	DVYIPVASITEEK	4	3	CID		59.3791	2.40036	0	1	2	1463.76	-0.72874	2987	2987	57.7592	MS2	17/24
	DDQVITDIVSNK	3	2	CID		44.9235	2.38849	0	2	2	1346.68	-0.126201	2448	2448	52.036	MS2	15/22
	DVQSGAIVEPAIQPELPEAVVSDK	8	6	CID		24.5243	2.29335	0	2	2	2491.29	-1.20979	3782	3782	66.2355	MS2	14/46
	NDIGSLANEATNGTK	3	2	CID		73.2527	1.83095	0	1	2	1504.72	-0.180889	1820	1820	45.1073	MS2	15/28
	TGVNTLNPQDEVLSGQLNKPELLYR	12	8	CID		10.5751	1.73555	0	1	3	2798.48	8.7957	3511	3511	63.3804	MS2	14/96
	TEEVPVKPTEETPVNPNEGTTEGTSIQEAENPVQPAEESTTNSEK	5	4	CID		22.8391	1.53787	0	1	4	4824.24	2.61788	2260	2260	49.9141	MS2	29/264
	GNTSPLDTLIELGK	3	2	CID		14.7185	1.35745	0	1	2	1457.79	1.75325	4403	4403	73.0353	MS2	9/26
	GNIEQVKPETPVEK	7	5	CID		6.76548	1.12941	0	1	3	1567.83	-0.747968	886	886	34.6678	MS2	12/52
	TGVNTLNPQDEVLSGQLNKPELLYR	12	8	CID		4.18094	0.878502	0	1	3	2798.47	1.47149	4097	4097	69.6645	MS2	10/96
	DGAITYTHEmTHDSDQDIYLGGYGR	7	5	CID	M10(Oxidation)	16.5737	0.840202	0	1	4	2831.22	-4.23251	2335	2335	50.7106	MS2	22/144
	ITAKAEKLqqELEnK	4	3	CID	Q9(Deamidated) Q10(Deamidated) N14(Deamidated)	2.64235	0.81096	0	1	3	1745.91	-7.8496	5151	5151	81.8791	MS2	9/56
	LDYqSDAIRK	3	2	CID	Q4(Deamidated)	4.26939	0.701161	0	1	3	1209.62	10.8535	1980	1980	46.8993	MS2	10/36
	TGVNTLNPQDEVLSGQLNKPELLYR	12	8	CID		28.2259	0.564565	0	1	2	2798.47	6.00153	3537	3537	63.6416	MS2	11/48
	KVFLPnTSNnDWFKK	1	1	CID	N6(Deamidated) N10(Deamidated)	8.72841	0.551838	0	1	2	1839.91	-18.0598	2694	2694	54.6111	MS2	5/28
	KVFLPnTSnNDWFKK	1	1	CID	N6(Deamidated) N9(Deamidated)	8.72841	0.540313	0.0208852	2	2	1839.91	-18.0598	2694	2694	54.6111	MS2	6/28
	LNVSQKMEALR	1	1	CID		2.38681	0.473513	0.436078	2	3	1288.71	6.84242	1569	1569	42.4217	MS2	10/40
	KVFLPNTSnnDWFKK	1	1	CID	N9(Deamidated) N10(Deamidated)	8.72841	0.423699	0.232203	3	2	1839.91	-18.0598	2694	2694	54.6111	MS2	4/28
gi116516874	10.17	14	354	14.47	hypothetical protein SPD_0093 [Streptococcus pneumoniae D39]
	Sequence	# Proteins	# Protein Groups	Activation Type	Modifications	Probability	XCorr	Δ Score	Rank	Charge	MH+ [Da]	ΔM [ppm]	First Scan	Last Scan	RT [min]	MSOrder	Ions Matched	Annotation
	NTQLEEEVSQAEVELESQQEEK	3	1	CID		51.8285	3.32766	0	1	3	2576.19	1.55111	3899	3899	67.4465	MS2	19/84
	NTQLEEEVSQAEVELESQQEEK	3	1	CID		71.9044	2.80302	0	1	2	2576.18	0.160752	4812	4812	77.749	MS2	15/42
	NTQLEEEVSQAEVELESQQEEK	3	1	CID		125.492	2.62227	0	1	2	2576.18	-1.05995	4216	4216	71.0695	MS2	21/42
	NTQLEEEVSQAEVELESQQEEK	3	1	CID		84.5402	2.25553	0	1	2	2576.18	-2.28065	4523	4523	74.4637	MS2	15/42
	AEETIADLDTPIEK	2	1	CID		44.6686	1.74311	0	1	2	1544.77	-0.366943	2357	2357	50.9316	MS2	13/26
	AEETIADLDTPIEK	2	1	CID		19.0761	1.71838	0	1	2	1544.76	-4.51733	6010	6010	95.0681	MS2	12/26
	AEETIADLDTPIEK	2	1	CID		25.9353	1.42598	0	1	2	1544.77	-0.0007325	2632	2632	53.9462	MS2	11/26
	NTQLEEEVSQAEVELESQQEEK	3	1	CID		32.9349	1.29072	0.292578	3	3	2576.19	1.0018	4166	4166	70.4783	MS2	15/84
	AEETIADLDTPIEK	2	1	CID		7.70567	1.20794	0	1	2	1544.77	-0.0007325	6258	6258	100.118	MS2	11/26
	AEETIADLDTPIEK	2	1	CID		2.75238	1.03766	0	1	2	1544.77	2.80688	3821	3821	66.6286	MS2	10/26
	NTQLEEEVSQAEVELESQQEEK	3	1	CID		32.2555	0.748439	0	1	2	2576.17	-12.0463	5128	5128	81.6146	MS2	8/42
	AEETIADLDTPIEK	2	1	CID		29.9695	0.628977	0	1	2	1544.77	0.121338	2910	2910	56.9913	MS2	8/26
	AEETIADLDTPIEK	2	1	CID		11.4245	0.591545	0	1	2	1544.77	-0.366943	3190	3190	60.0117	MS2	6/26
	AEETIADLDTPIEK	2	1	CID		8.24252	0.580651	0	1	2	1544.77	-0.244873	6361	6361	103.804	MS2	6/26
gi307127341	29.26	8	434	14.2955	phosphopyruvate hydratase [Streptococcus pneumoniae 670-6B]
	Sequence	# Proteins	# Protein Groups	Activation Type	Modifications	Probability	XCorr	Δ Score	Rank	Charge	MH+ [Da]	ΔM [ppm]	First Scan	Last Scan	RT [min]	MSOrder	Ions Matched	Annotation
	FEGTEDGVETILAAIEAAGYVPGK	2	1	CID		108.272	4.23475	0	1	2	2437.22	2.67075	5422	5422	85.9096	MS2	23/46
	VNQIGTLTETFEAIEmAK	2	1	CID	M16(Oxidation)	98.3528	3.3087	0	1	2	2011.01	2.15759	4815	4815	77.7833	MS2	19/34
	VNQIGTLTETFEAIEMAK	2	1	CID		48.3872	2.34664	0	1	2	1995.01	0.978838	4994	4994	80.0079	MS2	13/34
	GNPTLEVEVYTESGAFGR	2	1	CID		40.4831	2.25422	0	1	2	1925.92	-8.45636	3517	3517	63.4476	MS2	17/34
	YPIITIEDGmDENDWDGWK	2	1	CID	M10(Oxidation)	46.0289	2.15114	0	1	2	2313	0.772705	4064	4064	69.3183	MS2	15/36
	IEDQLGEVAEYR	2	1	CID		6.30763	1.27482	0	1	2	1421.69	2.15739	2276	2276	50.0804	MS2	12/22
	GmVPSGASTGEHEAVELR	2	1	CID	M2(Oxidation)	4.6871	0.97648	0	1	3	1842.86	-0.192948	1174	1174	38.0707	MS2	19/68
	DqqAIDRAmIALDGTPnK	2	1	CID	Q2(Deamidated) Q3(Deamidated) M9(Oxidation) N17(Deamidated)	5.84881	0.542877	0	1	3	1975.94	8.12294	2520	2520	52.828	MS2	13/68
gi194398492	10.75	18	1945	13.9146	immunoglobulin A1 protease [Streptococcus pneumoniae G54]
	Sequence	# Proteins	# Protein Groups	Activation Type	Modifications	Probability	XCorr	Δ Score	Rank	Charge	MH+ [Da]	ΔM [ppm]	First Scan	Last Scan	RT [min]	MSOrder	Ions Matched	Annotation
	DVQSGAIVEPAIQPELPEAVVSDK	8	6	CID		73.8347	2.97021	0	2	2	2491.29	1.71989	3494	3494	63.2168	MS2	17/46
	GVPEVQPALPEAVVTDK	2	2	CID		5.26466	2.60875	0	1	2	1748.94	-0.805029	2677	2677	54.4374	MS2	13/32
	IDFQEEIQENPDLAEGTVR	9	6	CID		27.0511	2.32569	0	1	2	2203.05	0.364111	3046	3046	58.4282	MS2	16/36
	DVQSGAIVEPAIQPELPEAVVSDK	8	6	CID		24.5243	2.29335	0	2	2	2491.29	-1.20979	3782	3782	66.2355	MS2	14/46
	IDFQEEIQENPDLAEGTVR	9	6	CID		16.3221	1.93422	0	1	3	2203.05	0.472735	3244	3244	60.5507	MS2	22/72
	GVPEVQPALPEAVVTDK	2	2	CID		27.005	1.88472	0	1	2	1748.94	-0.194678	2960	2960	57.4885	MS2	10/32
	GEPEVQPALPEAVVSDK	1	1	CID		13.0404	1.83192	0.403376	2	2	1764.9	0.259697	2402	2402	51.4726	MS2	10/32
	TGVNTLNPQDEVLSGQLNKPELLYR	12	8	CID		10.5751	1.73555	0	1	3	2798.48	8.7957	3511	3511	63.3804	MS2	14/96
	IEQPSAEDTKPENEASSTNGESERPK	2	2	CID		3.7041	1.50886	0	1	5	2830.29	-4.6684	1524	1524	41.9668	MS2	30/200
	GYKEGMVPYISNQYEK	2	2	CID		18.6319	1.4702	0.375437	2	2	1905.92	14.6661	2959	2959	57.4825	MS2	6/30
	QDPDGnSVYATNVVRR	1	1	CID	N6(Deamidated)	4.77853	0.943797	0	1	2	1791.86	-6.69302	1936	1936	46.4365	MS2	7/30
	TGVNTLNPQDEVLSGQLNKPELLYR	12	8	CID		4.18094	0.878502	0	1	3	2798.47	1.47149	4097	4097	69.6645	MS2	10/96
	NNEVITDINKNKQEINK	2	2	CID		2.09499	0.877202	0.624748	2	2	2014.05	-5.97866	4026	4026	68.8672	MS2	8/32
	QDPDGNSVYATnVVRR	1	1	CID	N12(Deamidated)	4.77853	0.808506	0.143348	2	2	1791.86	-6.69302	1936	1936	46.4365	MS2	7/30
	TGVNTLNPQDEVLSGQLNKPELLYR	12	8	CID		28.2259	0.564565	0	1	2	2798.47	6.00153	3537	3537	63.6416	MS2	11/48
	AqLYPDTnSRVLKLKK	1	1	CID	Q2(Deamidated) N8(Deamidated)	2.86161	0.537119	0	1	4	1876.04	-10.1914	4954	4954	79.4593	MS2	13/90
	LTmDEVNK	2	2	CID	M3(Oxidation)	5.46594	0.52262	0	1	2	965.457	-3.49228	1475	1475	41.3968	MS2	6/14
	YYAIYNLK	5	3	CID		4.39373	0.518088	0	1	2	1047.55	-3.42835	3558	3558	63.841	MS2	7/14
gi225856661	24.56	26	843	13.5745	pneumococcal histidine triad protein B [Streptococcus pneumoniae P1031]
	Sequence	# Proteins	# Protein Groups	Activation Type	Modifications	Probability	XCorr	Δ Score	Rank	Charge	MH+ [Da]	ΔM [ppm]	First Scan	Last Scan	RT [min]	MSOrder	Ions Matched	Annotation
	YYVEHPNERPHSDNGFGNASDHVQR	18	12	CID		86.581	3.02686	0	1	4	2925.3	-0.987586	974	974	35.7875	MS2	45/144
	QVDFEALDNLLER	21	12	CID		82.2385	2.43183	0	1	2	1561.79	0.0729003	4767	4767	77.2139	MS2	18/24
	VGDGYVFEENGVSR	17	12	CID		48.855	2.37985	0	1	2	1527.71	-0.158311	2118	2118	48.414	MS2	13/26
	DLSAETAAGIDSK	21	12	CID		26.5528	2.11013	0	1	2	1277.62	-0.2696	1442	1442	41.0292	MS2	14/24
	LGKPNAQITYTDDEIQVAK	23	13	CID		43.4663	1.89176	0	1	2	2104.09	-0.805107	1978	1978	46.887	MS2	15/36
	YYVEHPNERPHSDNGFGNASDHVQR	18	12	CID		27.6834	1.76761	0	1	3	2925.31	1.28416	982	982	35.8886	MS2	20/96
	DLSAETAAGIDSK	21	12	CID		36.9505	1.73408	0	1	2	1277.62	0.584892	6245	6245	99.7357	MS2	11/24
	DNNTISAEVDSLLALLK	13	7	CID		15.4173	1.70538	0	1	3	1815.97	0.693907	5524	5524	87.4989	MS2	22/64
	VGDGYVFEENGVSR	17	12	CID		32.7953	1.56321	0	1	2	1527.71	0.2079	1841	1841	45.3214	MS2	11/26
	VGDGYVFEENGVSR	17	12	CID		16.5469	1.42539	0	1	2	1527.71	-1.37901	2433	2433	51.8232	MS2	9/26
	TDLPSSDREFYNK	24	14	CID		33.3388	1.33767	0	1	2	1571.74	7.21103	1344	1344	39.9646	MS2	12/24
	AYDLLAR	21	13	CID		31.1422	1.2945	0	1	2	821.454	2.72097	1705	1705	43.8712	MS2	10/12
	IAEAEALLEK	5	3	CID		15.8179	1.28914	0	1	2	1086.6	-0.373936	2201	2201	49.2902	MS2	11/18
	TDLPSSDREFYNK	24	14	CID		11.9494	1.26074	0	1	3	1571.73	-0.492851	1413	1413	40.7317	MS2	14/48
	DLSAETAAGIDSK	21	12	CID		16.2906	1.15982	0	1	2	1277.62	-0.51374	6337	6337	102.746	MS2	8/24
	GYTLEDLLATVK	20	13	CID		31.6484	0.863611	0	1	2	1322.72	-0.365068	4925	4925	79.146	MS2	6/22
	VGDGYVFEENGVSR	17	12	CID		15.1492	0.762354	0	1	2	1527.71	-1.50108	6396	6396	105.233	MS2	5/26
	DITSDEGDAYVTPHmTHSHWIK	25	15	CID	M15(Oxidation)	13.7074	0.751742	0	1	5	2556.15	0.913616	1911	1911	46.1575	MS2	29/168
	DSDIVNEIK	15	8	CID		7.72277	0.724031	0	1	2	1032.52	0.456533	1228	1228	38.6662	MS2	6/16
	VNGKYYVYLK	7	5	CID		10.5302	0.720905	0.537294	2	3	1246.69	7.3515	2830	2830	56.1346	MS2	7/36
	DITSDEGDAYVTPHmTHSHWIK	25	15	CID	M15(Oxidation)	3.65572	0.595476	0.203806	2	4	2556.15	1.04913	1797	1797	44.8656	MS2	23/126
	DLSAETAAGIDSK	21	12	CID		13.4342	0.561454	0	1	2	1277.62	-0.39167	3101	3101	59.0245	MS2	5/24
	KTDLPSSDREFYNK	24	14	CID		46.4006	0.517171	0	1	3	1699.83	-0.370077	1091	1091	37.2409	MS2	15/52
	VGDGYVFEENGVSR	17	12	CID		2.07344	0.474028	0	1	2	1527.71	-1.37901	2852	2852	56.3826	MS2	5/26
	DLSAETAAGIDSK	21	12	CID		7.89403	0.414568	0	1	2	1277.62	0.951103	6479	6479	108.866	MS2	5/24
	QKQEHSHnHGGGSnDqAVVAAR	3	3	CID	N8(Deamidated) N14(Deamidated) Q16(Deamidated)	11.6467	0.407575	0.000531453	2	2	2330.05	0.0554081	2836	2836	56.1987	MS2	5/42
gi169833025	6.37	10	1900	13.389	zinc metalloprotease ZmpB [Streptococcus pneumoniae Hungary19A-6]
	Sequence	# Proteins	# Protein Groups	Activation Type	Modifications	Probability	XCorr	Δ Score	Rank	Charge	MH+ [Da]	ΔM [ppm]	First Scan	Last Scan	RT [min]	MSOrder	Ions Matched	Annotation
	VEEGKEDSAEPAPVEEVGGEVESKPEEK	10	9	CID		114.407	4.07071	0	1	3	2983.39	-2.67184	1628	1628	43.036	MS2	30/108
	TENQVVETEEAPKEEAPR	1	1	CID		64.9889	3.66947	0	1	3	2055.98	-1.05355	904	904	34.9363	MS2	23/68
	VPEQPVQPTQAEQPSTPK	3	3	CID		85.2063	3.10363	0	1	2	1961	0.685244	905	905	34.9426	MS2	17/34
	TENQVVETEEAPKEEAPR	1	1	CID		87.1086	2.54515	0	1	2	2055.99	2.13372	876	876	34.5539	MS2	15/34
	NADNTLSEEYVHYFEK	1	1	CID		18.8006	0.906673	0	1	2	1958.87	-1.90784	2358	2358	50.9374	MS2	11/30
	EDSAEPAPVEEVGGEVESKPEEK	10	9	CID		12.9099	0.893118	0.0803124	2	3	2441.12	-2.93654	1727	1727	44.0931	MS2	13/88
	DAANKEnKGLLGDDFIIK	1	1	CID	N7(Deamidated)	12.3363	0.85251	0.0346985	2	2	1962	-17.9097	5183	5183	82.2113	MS2	7/34
	DAAnKENKGLLGDDFIIK	1	1	CID	N4(Deamidated)	12.3363	0.766272	0.132347	3	2	1962	-17.9097	5183	5183	82.2113	MS2	7/34
	EETKTAKGTQEEGK	4	4	CID		3.36998	0.618271	0	1	2	1535.76	7.5454	1848	1848	45.4427	MS2	6/26
	YYGFKYDEK	1	1	CID		4.55356	0.487833	0.070582	2	2	1212.55	-5.49796	3565	3565	63.9113	MS2	5/16
gi15901019	12.62	24	2004	12.782	immunoglobulin A1 protease [Streptococcus pneumoniae TIGR4]
	Sequence	# Proteins	# Protein Groups	Activation Type	Modifications	Probability	XCorr	Δ Score	Rank	Charge	MH+ [Da]	ΔM [ppm]	First Scan	Last Scan	RT [min]	MSOrder	Ions Matched	Annotation
	DVQSGAIVEPAIQPELPEAVVSDK	8	6	CID		73.8347	2.97021	0	2	2	2491.29	1.71989	3494	3494	63.2168	MS2	17/46
	DGAITYTHEmTHDSDQDIYLGGYGR	7	5	CID	M10(Oxidation)	49.8301	2.80427	0	1	3	2831.22	3.28826	2154	2154	48.8486	MS2	28/96
	DnQVITDIVSNK	2	2	CID	N2(Deamidated)	44.9235	2.38849	0	1	2	1346.68	-0.122201	2448	2448	52.036	MS2	15/22
	IDFQEEIQENPDLAEGTVR	9	6	CID		27.0511	2.32569	0	1	2	2203.05	0.364111	3046	3046	58.4282	MS2	16/36
	DNqVITDIVSNK	2	2	CID	Q3(Deamidated)	44.9235	2.3155	0.0305592	3	2	1346.68	-0.122201	2448	2448	52.036	MS2	15/22
	DVQSGAIVEPAIQPELPEAVVSDK	8	6	CID		24.5243	2.29335	0	2	2	2491.29	-1.20979	3782	3782	66.2355	MS2	14/46
	IDFQEEIQENPDLAEGTVR	9	6	CID		16.3221	1.93422	0	1	3	2203.05	0.472735	3244	3244	60.5507	MS2	22/72
	AINQNPSGTYHLAASLNANEVELGPDER	4	3	CID		36.7309	1.8924	0	1	3	2980.44	0.82254	3090	3090	58.9292	MS2	22/108
	TGVNTLNPQDEVLSGQLNKPELLYR	12	8	CID		10.5751	1.73555	0	1	3	2798.48	8.7957	3511	3511	63.3804	MS2	14/96
	TEEVPVKPTEETPVNPNEGTTEGTSIQEAENPVQPAEESTTNSEK	5	4	CID		22.8391	1.53787	0	1	4	4824.24	2.61788	2260	2260	49.9141	MS2	29/264
	SDSTESRRLqVLDPTTR	3	2	CID	Q10(Deamidated)	11.6436	1.46909	0	1	2	1962.01	16.7835	5845	5845	92.5604	MS2	8/32
	KVTNEYHPDPDGNKVYATNVVR	3	2	CID		2.52885	1.41415	0.058618	2	3	2516.28	22.6966	4656	4656	75.9443	MS2	14/84
	DNQVITDIVSnK	2	2	CID	N11(Deamidated)	2.86283	1.18529	0.503747	4	2	1346.68	-0.122201	2448	2448	52.036	MS2	11/22
	SDSTESRRLqVLDPTTR	3	2	CID	Q10(Deamidated)	4.4597	1.18053	0	1	2	1962	14.8303	5659	5659	89.5348	MS2	5/32
	SDSTESRRLqVLDPTTR	3	2	CID	Q10(Deamidated)	5.9778	1.17153	0	1	3	1962	14.1455	3641	3641	64.7052	MS2	10/64
	GNIEQVKPETPVEK	7	5	CID		6.76548	1.12941	0	1	3	1567.83	-0.747968	886	886	34.6678	MS2	12/52
	TGVNTLNPQDEVLSGQLNKPELLYR	12	8	CID		4.18094	0.878502	0	1	3	2798.47	1.47149	4097	4097	69.6645	MS2	10/96
	SDSTESRRLqVLDPTTR	3	2	CID	Q10(Deamidated)	3.49143	0.869998	0	1	2	1962	14.5862	4345	4345	72.4081	MS2	6/32
	GIGGLLAKAEqSSITESSFK	2	2	CID	Q11(Deamidated)	7.49473	0.854533	0	1	2	2024.06	4.76854	4142	4142	70.1599	MS2	7/38
	DGAITYTHEmTHDSDQDIYLGGYGR	7	5	CID	M10(Oxidation)	16.5737	0.840202	0	1	4	2831.22	-4.23251	2335	2335	50.7106	MS2	22/144
	SDSTESRRLqVLDPTTR	3	2	CID	Q10(Deamidated)	13.5756	0.818433	0	1	2	1962	13.4876	4909	4909	78.9745	MS2	7/32
	GIGGLLAKAEQSSITESSFKGR	2	2	CID		4.64139	0.814719	0.703883	2	2	2236.18	-9.17167	2980	2980	57.6868	MS2	7/42
	SDSTESRRLqVLDPTTR	3	2	CID	Q10(Deamidated)	2.26501	0.575108	0.429194	4	2	1962.01	16.7835	4066	4066	69.3463	MS2	5/32
	TGVNTLNPQDEVLSGQLNKPELLYR	12	8	CID		28.2259	0.564565	0	1	2	2798.47	6.00153	3537	3537	63.6416	MS2	11/48
gi307126444	24.72	7	178	12.1993	50S ribosomal protein L6 [Streptococcus pneumoniae 670-6B]
	Sequence	# Proteins	# Protein Groups	Activation Type	Modifications	Probability	XCorr	Δ Score	Rank	Charge	MH+ [Da]	ΔM [ppm]	First Scan	Last Scan	RT [min]	MSOrder	Ions Matched	Annotation
	SHPDEVEAPEGITFELPNPTTIVVSGISK	6	1	CID		14.3676	3.25372	0	1	3	3063.55	-2.02625	4844	4844	78.1369	MS2	26/112
	SHPDEVEAPEGITFELPNPTTIVVSGISK	6	1	CID		58.686	3.21818	0	1	3	3063.55	-4.77283	5858	5858	92.7351	MS2	27/112
	SHPDEVEAPEGITFELPNPTTIVVSGISK	6	1	CID		92.7016	3.19466	0	1	3	3063.55	0.903438	5087	5087	81.1714	MS2	35/112
	SHPDEVEAPEGITFELPNPTTIVVSGISK	6	1	CID		36.8562	2.53272	0	1	3	3063.57	12.9884	5671	5671	89.7264	MS2	23/112
	SHPDEVEAPEGITFELPNPTTIVVSGISK	6	1	CID		16.5364	1.90454	0	1	3	3063.55	-2.20935	6179	6179	98.0938	MS2	19/112
	VEGTEVTLHRPNDSK	3	1	CID		21.4779	0.657646	0.14049	2	3	1681.85	-1.67226	752	752	32.943	MS2	13/56
	VEGTEVTLHRPNDSK	3	1	CID		21.8975	0.491538	0	1	4	1681.85	0.511554	742	742	32.7921	MS2	16/84
gi307128477	36.71	9	346	10.7277	translation elongation factor Ts [Streptococcus pneumoniae 670-6B]
	Sequence	# Proteins	# Protein Groups	Activation Type	Modifications	Probability	XCorr	Δ Score	Rank	Charge	MH+ [Da]	ΔM [ppm]	First Scan	Last Scan	RT [min]	MSOrder	Ions Matched	Annotation
	DELAQLNHVIDQDNESR	3	1	CID		68.6668	3.03953	0	1	2	1995.94	4.85462	2758	2758	55.361	MS2	15/32
	VIAEGKPANNEEALALImPSGETLEAAYVSATATIGEK	2	1	CID	M18(Oxidation)	6.76897	2.9224	0	1	3	3874.96	1.4485	5036	5036	80.5564	MS2	21/148
	AQLTDDVIAQAEADIK	3	1	CID		53.1491	2.55492	0	1	2	1700.87	0.807978	3872	3872	67.1404	MS2	14/30
	DELAQLNHVIDQDNESR	3	1	CID		50.6954	2.21087	0	1	3	1995.94	0.0193953	2784	2784	55.6311	MS2	21/64
	RFALIEKTDAqHFGAYqHNGGR	3	1	CID	Q11(Deamidated) Q17(Deamidated)	8.35318	1.18518	0	1	3	2518.21	-9.06335	3542	3542	63.6861	MS2	13/84
	RFALIEKTDAqHFGAYQHnGGR	3	1	CID	Q11(Deamidated) N19(Deamidated)	8.35318	1.06743	0.0993497	3	3	2518.21	-9.06335	3542	3542	63.6861	MS2	13/84
	FmLDNTKVDQAYTLLAQVYImDDSK	3	1	CID	M2(Oxidation) M21(Oxidation)	8.38129	0.935985	0.0816779	3	3	2954.41	-7.76885	4332	4332	72.2642	MS2	14/96
	FEVGEGIEK	3	1	CID		3.10042	0.935458	0.5118	2	2	1007.5	-0.934697	1315	1315	39.613	MS2	10/16
	FALIEKTDAqHFGAYqHnGGR	3	1	CID	Q10(Deamidated) Q16(Deamidated) N18(Deamidated)	3.34903	0.589709	0	1	2	2363.12	9.84853	5074	5074	81.0193	MS2	4/40
gi225859446	21.75	13	947	10.5208	neuraminidase [Streptococcus pneumoniae 70585]
	Sequence	# Proteins	# Protein Groups	Activation Type	Modifications	Probability	XCorr	Δ Score	Rank	Charge	MH+ [Da]	ΔM [ppm]	First Scan	Last Scan	RT [min]	MSOrder	Ions Matched	Annotation
	DSYLWmSYSDDDGKTWSAPQDITPmVK	12	3	CID	M6(Oxidation) M25(Oxidation)	52.5517	3.27628	0	1	3	3168.38	0.539825	3590	3590	64.1491	MS2	26/104
	GEFAYNSLQELGNGEYGILYEHTEK	13	4	CID		34.3996	2.72393	0	1	3	2861.33	0.346114	4187	4187	70.751	MS2	24/96
	TLLFAVDKEDIGQEIIGIAK	10	4	CID		28.7282	2.43983	0	1	3	2173.21	0.366915	4752	4752	77.0594	MS2	22/76
	DLENVETVIEKEDVETNASNGQR	12	4	CID		66.9708	2.08074	0	1	2	2589.22	-2.92433	3051	3051	58.4734	MS2	11/44
	VDLSSELDKLK	13	4	CID		3.54725	1.55802	0	1	3	1246.69	1.4315	2830	2830	56.1346	MS2	16/40
	ISEKEDVFEGGMNNKPNKDGIK	2	1	CID		2.62163	1.00961	0	1	3	2449.19	-12.9257	3962	3962	68.1272	MS2	14/84
	AQNTESTVVQLNNGDVK	13	4	CID		11.2544	0.990206	0	1	2	1816.9	1.21145	1507	1507	41.755	MS2	8/32
	DMPDVnqAqLGATKRGnK	2	1	CID	N6(Deamidated) Q7(Deamidated) Q9(Deamidated) N17(Deamidated)	2.31102	0.859461	0.507298	3	2	1946.92	3.06964	3629	3629	64.5706	MS2	6/34
	GVIGLEFDSEVLVnK	13	4	CID	N14(Deamidated)	3.69358	0.577472	0	1	2	1619.84	-14.2187	4081	4081	69.5198	MS2	7/28
	qEQERKDKqEEK	12	3	CID	Q1(Deamidated) Q9(Deamidated)	3.45264	0.543847	0	1	3	1576.75	6.56673	3337	3337	61.5269	MS2	9/44
	QEqERKDKqEEK	12	3	CID	Q3(Deamidated) Q9(Deamidated)	3.45264	0.543184	0.00121961	2	3	1576.75	6.56673	3337	3337	61.5269	MS2	9/44
	VDLSSELDKLK	13	4	CID		20.1211	0.535609	0	1	2	1246.69	-0.447139	2866	2866	56.5254	MS2	6/20
	DVYVqMSAIHTmHNGK	6	2	CID	Q5(Deamidated) M12(Oxidation)	7.61609	0.444023	0.229212	4	2	1847.86	13.7199	1551	1551	42.2045	MS2	5/30
gi221232428	23.83	17	965	10.5208	sialidase A (neuraminidase A) [Streptococcus pneumoniae ATCC 700669]
	Sequence	# Proteins	# Protein Groups	Activation Type	Modifications	Probability	XCorr	Δ Score	Rank	Charge	MH+ [Da]	ΔM [ppm]	First Scan	Last Scan	RT [min]	MSOrder	Ions Matched	Annotation
	DSYLWmSYSDDDGKTWSAPQDITPmVK	12	3	CID	M6(Oxidation) M25(Oxidation)	52.5517	3.27628	0	1	3	3168.38	0.539825	3590	3590	64.1491	MS2	26/104
	GEFAYNSLQELGNGEYGILYEHTEK	13	4	CID		34.3996	2.72393	0	1	3	2861.33	0.346114	4187	4187	70.751	MS2	24/96
	TLLFAVDKEDIGQEIIGIAK	10	4	CID		28.7282	2.43983	0	1	3	2173.21	0.366915	4752	4752	77.0594	MS2	22/76
	DLENVETVIEKEDVETNASNGQR	12	4	CID		66.9708	2.08074	0	1	2	2589.22	-2.92433	3051	3051	58.4734	MS2	11/44
	VDLSSELDKLK	13	4	CID		3.54725	1.55802	0	1	3	1246.69	1.4315	2830	2830	56.1346	MS2	16/40
	DmPDVTHVQIGATK	11	3	CID	M2(Oxidation)	11.0303	1.38263	0	1	3	1527.75	0.163341	1133	1133	37.6615	MS2	17/52
	AQNTESTVVQLNNGDVK	13	4	CID		11.2544	0.990206	0	1	2	1816.9	1.21145	1507	1507	41.755	MS2	8/32
	QVDGQKIHSSTmNNK	5	2	CID	M12(Oxidation)	9.10103	0.773841	0	1	2	1702.8	-13.1633	760	760	33.0506	MS2	6/28
	DmPDVTHVQIGATKR	11	3	CID	M2(Oxidation)	9.8081	0.730936	0	1	4	1683.85	0.0430778	1045	1045	36.645	MS2	20/84
	LENATVHmEFKPDAK	11	3	CID	M8(Oxidation)	8.12827	0.683434	0	1	3	1745.85	1.61797	872	872	34.513	MS2	12/56
	LKKLENATVHmEFKPDAK	11	3	CID	M11(Oxidation)	5.25987	0.682596	0.727099	2	2	2115.13	3.62239	5924	5924	93.8475	MS2	4/34
	DEYFTmAVYnnTATLEGR	11	3	CID	M6(Oxidation) N10(Deamidated) N11(Deamidated)	4.19502	0.625664	0	1	2	2112.9	-5.54765	1555	1555	42.2606	MS2	6/34
	GVIGLEFDSEVLVnK	13	4	CID	N14(Deamidated)	3.69358	0.577472	0	1	2	1619.84	-14.2187	4081	4081	69.5198	MS2	7/28
	qEQERKDKqEEK	12	3	CID	Q1(Deamidated) Q9(Deamidated)	3.45264	0.543847	0	1	3	1576.75	6.56673	3337	3337	61.5269	MS2	9/44
	QEqERKDKqEEK	12	3	CID	Q3(Deamidated) Q9(Deamidated)	3.45264	0.543184	0.00121961	2	3	1576.75	6.56673	3337	3337	61.5269	MS2	9/44
	VDLSSELDKLK	13	4	CID		20.1211	0.535609	0	1	2	1246.69	-0.447139	2866	2866	56.5254	MS2	6/20
	DVYVqMSAIHTmHNGK	6	2	CID	Q5(Deamidated) M12(Oxidation)	7.61609	0.444023	0.229212	4	2	1847.86	13.7199	1551	1551	42.2045	MS2	5/30
gi225855121	22.93	17	942	10.5208	neuraminidase [Streptococcus pneumoniae JJA]
	Sequence	# Proteins	# Protein Groups	Activation Type	Modifications	Probability	XCorr	Δ Score	Rank	Charge	MH+ [Da]	ΔM [ppm]	First Scan	Last Scan	RT [min]	MSOrder	Ions Matched	Annotation
	DSYLWmSYSDDDGKTWSAPQDITPmVK	12	3	CID	M6(Oxidation) M25(Oxidation)	52.5517	3.27628	0	1	3	3168.38	0.539825	3590	3590	64.1491	MS2	26/104
	GEFAYNSLQELGNGEYGILYEHTEK	13	4	CID		34.3996	2.72393	0	1	3	2861.33	0.346114	4187	4187	70.751	MS2	24/96
	TLLFAVDKEDIGQEIIGIAK	10	4	CID		28.7282	2.43983	0	1	3	2173.21	0.366915	4752	4752	77.0594	MS2	22/76
	DLENVETVIEKEDVETNASNGQR	12	4	CID		66.9708	2.08074	0	1	2	2589.22	-2.92433	3051	3051	58.4734	MS2	11/44
	VDLSSELDKLK	13	4	CID		3.54725	1.55802	0	1	3	1246.69	1.4315	2830	2830	56.1346	MS2	16/40
	DmPDVTHVQIGATK	11	3	CID	M2(Oxidation)	11.0303	1.38263	0	1	3	1527.75	0.163341	1133	1133	37.6615	MS2	17/52
	AQNTESTVVQLNNGDVK	13	4	CID		11.2544	0.990206	0	1	2	1816.9	1.21145	1507	1507	41.755	MS2	8/32
	QVDGQKIHSSTmNNK	5	2	CID	M12(Oxidation)	9.10103	0.773841	0	1	2	1702.8	-13.1633	760	760	33.0506	MS2	6/28
	TDIFESGRNGnPNK	1	1	CID	N11(Deamidated)	14.1638	0.762274	0	1	2	1549.72	-0.272748	1077	1077	37.0421	MS2	6/26
	TDIFESGRnGNPNK	1	1	CID	N9(Deamidated)	6.49306	0.758879	0.00445279	2	2	1549.72	-0.272748	1077	1077	37.0421	MS2	6/26
	TDIFESGRNGNPnK	1	1	CID	N13(Deamidated)	14.1638	0.734554	0.036365	3	2	1549.72	-0.272748	1077	1077	37.0421	MS2	6/26
	DmPDVTHVQIGATKR	11	3	CID	M2(Oxidation)	9.8081	0.730936	0	1	4	1683.85	0.0430778	1045	1045	36.645	MS2	20/84
	LENATVHmEFKPDAK	11	3	CID	M8(Oxidation)	8.12827	0.683434	0	1	3	1745.85	1.61797	872	872	34.513	MS2	12/56
	LKKLENATVHmEFKPDAK	11	3	CID	M11(Oxidation)	5.25987	0.682596	0.727099	2	2	2115.13	3.62239	5924	5924	93.8475	MS2	4/34
	DEYFTmAVYnnTATLEGR	11	3	CID	M6(Oxidation) N10(Deamidated) N11(Deamidated)	4.19502	0.625664	0	1	2	2112.9	-5.54765	1555	1555	42.2606	MS2	6/34
	GVIGLEFDSEVLVnK	13	4	CID	N14(Deamidated)	3.69358	0.577472	0	1	2	1619.84	-14.2187	4081	4081	69.5198	MS2	7/28
	VDLSSELDKLK	13	4	CID		20.1211	0.535609	0	1	2	1246.69	-0.447139	2866	2866	56.5254	MS2	6/20
gi307067684	12.96	27	1875	10.3935	hypothetical protein SPAP_1059 [Streptococcus pneumoniae AP200]
	Sequence	# Proteins	# Protein Groups	Activation Type	Modifications	Probability	XCorr	Δ Score	Rank	Charge	MH+ [Da]	ΔM [ppm]	First Scan	Last Scan	RT [min]	MSOrder	Ions Matched	Annotation
	DVQSGAIVEPAIQPELPEAVVSDK	8	6	CID		73.8347	2.97021	0	2	2	2491.29	1.71989	3494	3494	63.2168	MS2	17/46
	DGAITYTHEmTHDSDQDIYLGGYGR	7	5	CID	M10(Oxidation)	49.8301	2.80427	0	1	3	2831.22	3.28826	2154	2154	48.8486	MS2	28/96
	IDFQEEIQENPDLAEGTVR	9	6	CID		27.0511	2.32569	0	1	2	2203.05	0.364111	3046	3046	58.4282	MS2	16/36
	DVQSGAIVEPAIQPELPEAVVSDK	8	6	CID		24.5243	2.29335	0	2	2	2491.29	-1.20979	3782	3782	66.2355	MS2	14/46
	IDFQEEIQENPDLAEGTVR	9	6	CID		16.3221	1.93422	0	1	3	2203.05	0.472735	3244	3244	60.5507	MS2	22/72
	TGVNTLNPQDEVLSGQLNKPELLYR	12	8	CID		10.5751	1.73555	0	1	3	2798.48	8.7957	3511	3511	63.3804	MS2	14/96
	SDSTESRRLqVLDPTTR	3	2	CID	Q10(Deamidated)	11.6436	1.46909	0	1	2	1962.01	16.7835	5845	5845	92.5604	MS2	8/32
	KVTNEYHPDPDGNKVYATNVVR	3	2	CID		2.52885	1.41415	0.058618	2	3	2516.28	22.6966	4656	4656	75.9443	MS2	14/84
	DGMVPYISnqFEADARANnKTITSYGK	2	1	CID	N9(Deamidated) Q10(Deamidated) N19(Deamidated)	5.98356	1.31675	0.554989	3	4	2993.36	-28.3061	1813	1813	45.0193	MS2	22/156
	DGMVPYISnqFEADARAnNKTITSYGK	2	1	CID	N9(Deamidated) Q10(Deamidated) N18(Deamidated)	5.98356	1.23114	0.58392	4	4	2993.36	-28.3061	1813	1813	45.0193	MS2	23/156
	DGMVPYISnQFEADARAnnKTITSYGK	2	1	CID	N9(Deamidated) N18(Deamidated) N19(Deamidated)	11.4137	1.1846	0.59965	5	4	2993.36	-28.3061	1813	1813	45.0193	MS2	24/156
	SDSTESRRLqVLDPTTR	3	2	CID	Q10(Deamidated)	4.4597	1.18053	0	1	2	1962	14.8303	5659	5659	89.5348	MS2	5/32
	SDSTESRRLqVLDPTTR	3	2	CID	Q10(Deamidated)	5.9778	1.17153	0	1	3	1962	14.1455	3641	3641	64.7052	MS2	10/64
	DGMVPYISNqFEADARAnnKTITSYGK	2	1	CID	Q10(Deamidated) N18(Deamidated) N19(Deamidated)	11.4137	1.15625	0.60923	6	4	2993.36	-28.3061	1813	1813	45.0193	MS2	24/156
	GNIEQVKPETPVEK	7	5	CID		6.76548	1.12941	0	1	3	1567.83	-0.747968	886	886	34.6678	MS2	12/52
	TIHSVnELQnLMNEAVRK	2	1	CID	N6(Deamidated) N10(Deamidated)	4.66662	1.07548	0.562842	4	4	2098.07	14.0499	2077	2077	47.969	MS2	18/102
	TIHSVnELqNLMNEAVRK	2	1	CID	N6(Deamidated) Q9(Deamidated)	4.66662	1.02319	0.584095	5	4	2098.07	14.0499	2077	2077	47.969	MS2	18/102
	DLNDFVEEnARETAKRqR	1	1	CID	N9(Deamidated) Q17(Deamidated)	2.52465	0.957005	0	1	3	2193.05	-1.74755	3833	3833	66.7648	MS2	13/68
	TGVNTLNPQDEVLSGQLNKPELLYR	12	8	CID		4.18094	0.878502	0	1	3	2798.47	1.47149	4097	4097	69.6645	MS2	10/96
	SDSTESRRLqVLDPTTR	3	2	CID	Q10(Deamidated)	3.49143	0.869998	0	1	2	1962	14.5862	4345	4345	72.4081	MS2	6/32
	DGAITYTHEmTHDSDQDIYLGGYGR	7	5	CID	M10(Oxidation)	16.5737	0.840202	0	1	4	2831.22	-4.23251	2335	2335	50.7106	MS2	22/144
	SDSTESRRLqVLDPTTR	3	2	CID	Q10(Deamidated)	13.5756	0.818433	0	1	2	1962	13.4876	4909	4909	78.9745	MS2	7/32
	AGKDLNDFVEEnARETAK	2	1	CID	N12(Deamidated)	2.70049	0.697841	0.17024	3	2	2007.96	-5.55087	2353	2353	50.8762	MS2	4/34
	SDSTESRRLqVLDPTTR	3	2	CID	Q10(Deamidated)	2.26501	0.575108	0.429194	4	2	1962.01	16.7835	4066	4066	69.3463	MS2	5/32
	TGVNTLNPQDEVLSGQLNKPELLYR	12	8	CID		28.2259	0.564565	0	1	2	2798.47	6.00153	3537	3537	63.6416	MS2	11/48
	VGGVAGSLWTQEGGTDnnTGR	2	1	CID	N17(Deamidated) N18(Deamidated)	2.04	0.469591	0	1	2	2077.93	-14.4413	1849	1849	45.4484	MS2	5/40
	TKEHLTETLK	2	1	CID		2.17881	0.46446	0	1	2	1199.65	-11.4124	2550	2550	53.1454	MS2	4/18
gi307127077	34.43	7	122	10.3409	50S ribosomal protein L7/L12 [Streptococcus pneumoniae 670-6B]
	Sequence	# Proteins	# Protein Groups	Activation Type	Modifications	Probability	XCorr	Δ Score	Rank	Charge	MH+ [Da]	ΔM [ppm]	First Scan	Last Scan	RT [min]	MSOrder	Ions Matched	Annotation
	AIEEEFGVTAAAPVAVAAADAADAGAAK	2	1	CID		138.682	4.49438	0	1	3	2557.28	1.11973	4008	4008	68.6485	MS2	34/108
	AIEEEFGVTAAAPVAVAAADAADAGAAK	2	1	CID		12.7129	2.43465	0	1	2	2557.29	7.23669	4234	4234	71.2418	MS2	14/54
	AIEEEFGVTAAAPVAVAAADAADAGAAK	2	1	CID		14.4365	1.8921	0	1	3	2557.28	1.85215	6044	6044	95.6203	MS2	24/108
	DSFDVELTSAGDKK	2	1	CID		2.59583	1.73348	0	1	3	1511.72	-0.177626	1919	1919	46.234	MS2	14/52
	AIEEEFGVTAAAPVAVAAADAADAGAAK	2	1	CID		10.7368	1.70637	0	1	2	2557.28	3.57458	3953	3953	68.0435	MS2	16/54
	AIEEEFGVTAAAPVAVAAADAADAGAAK	2	1	CID		3.99247	1.70549	0	1	2	2557.27	-3.5055	5745	5745	90.9261	MS2	10/54
	AIEEEFGVTAAAPVAVAAADAADAGAAK	2	1	CID		26.4133	1.20353	0	1	2	2557.28	2.84216	5955	5955	94.3455	MS2	11/54
gi307068172	22.19	12	658	10.066	hypothetical protein SPAP_1550 [Streptococcus pneumoniae AP200]
	Sequence	# Proteins	# Protein Groups	Activation Type	Modifications	Probability	XCorr	Δ Score	Rank	Charge	MH+ [Da]	ΔM [ppm]	First Scan	Last Scan	RT [min]	MSOrder	Ions Matched	Annotation
	AVGLDVYTQmLEEANKEQDPAK	4	1	CID	M10(Oxidation)	59.0214	2.99022	0	1	3	2465.19	-0.13078	2901	2901	56.8934	MS2	22/84
	SEALYLVQDSVAGLDDYITGK	7	3	CID		111.002	2.90356	0	1	2	2257.13	2.99114	5293	5293	83.9825	MS2	15/40
	EWQGINFADGQDPYYNPEK	7	3	CID		79.3858	2.5304	0	1	2	2271	0.333877	3340	3340	61.5598	MS2	15/36
	SEALYLVQDSVAGLDDYITGK	7	3	CID		24.0013	1.64186	0	1	2	2257.12	0.061455	5592	5592	88.5305	MS2	12/40
	AVGLDVYTQmLEEANKEQDPAK	4	1	CID	M10(Oxidation)	16.0002	1.30975	0	1	2	2465.19	7.32895	2798	2798	55.7698	MS2	12/42
	EKEESNKKAQEELAK	7	3	CID		6.59237	1.27835	0	1	3	1760.92	17.2016	1726	1726	44.0871	MS2	15/56
	AVGLDVYTQmLEEANK	4	1	CID	M10(Oxidation)	42.1977	1.25259	0	1	2	1796.87	1.34923	2911	2911	56.9971	MS2	13/30
	YKNNIIYSmQnSTSYFFnFnLDR	5	2	CID	M9(Oxidation) N11(Deamidated) N18(Deamidated) N20(Deamidated)	3.52879	0.930677	0.200304	2	3	2898.32	22.8726	2671	2671	54.3734	MS2	12/88
	WFTSEGEEYAPVTAQDFVTGLQYAADKK	7	3	CID		25.6547	0.777121	0	1	3	3151.49	-0.624511	4850	4850	78.2033	MS2	20/108
	AVGLDVYTQMLEEANKEQDPAK	4	1	CID		23.8232	0.716981	0.289845	2	3	2449.19	-1.67574	3962	3962	68.1272	MS2	17/84
	DFGEVVASK	6	2	CID		8.15359	0.495829	0	1	2	951.478	-0.654639	941	941	35.3888	MS2	5/16
	KAqEELAKTCqIKSnCR	1	1	CID	Q3(Deamidated) Q11(Deamidated) N15(Deamidated)	5.49529	0.493783	0	1	2	1952.93	-7.91588	3824	3824	66.6623	MS2	4/32
gi225858695	21.36	9	501	10.0375	pyruvate kinase [Streptococcus pneumoniae 70585]
	Sequence	# Proteins	# Protein Groups	Activation Type	Modifications	Probability	XCorr	Δ Score	Rank	Charge	MH+ [Da]	ΔM [ppm]	First Scan	Last Scan	RT [min]	MSOrder	Ions Matched	Annotation
	GDmGIEVPFEmVPVYQK	6	1	CID	M3(Oxidation) M11(Oxidation)	113.64	3.03524	0	1	2	1970.92	-1.02214	3378	3378	62.0188	MS2	22/32
	AVEAGLVESGDDIVIVAGVPVGEAVR	6	1	CID		27.379	2.59588	0	1	2	2521.35	0.882939	4529	4529	74.5319	MS2	13/50
	IENQQGIDNLDEIIEAADGImIAR	6	1	CID	M21(Oxidation)	92.8133	2.43541	0	1	2	2657.31	0.781611	5090	5090	81.2043	MS2	21/46
	IENQQGIDNLDEIIEAADGImIAR	6	1	CID	M21(Oxidation)	35.4665	1.97099	0	1	2	2657.31	-0.439092	4561	4561	74.8877	MS2	15/46
	IENQQGIDNLDEIIEAADGImIAR	6	1	CID	M21(Oxidation)	31.6709	1.5691	0	1	2	2657.31	-2.14808	5823	5823	92.2734	MS2	17/46
	AVEAGLVESGDDIVIVAGVPVGEAVR	6	1	CID		17.2744	1.2246	0	1	2	2521.36	7.2306	4851	4851	78.2093	MS2	9/50
	GDmGIEVPFEmVPVYQKmIIK	6	1	CID	M3(Oxidation) M11(Oxidation) M18(Oxidation)	4.36839	1.11496	0.542543	2	2	2472.23	4.1638	4879	4879	78.534	MS2	9/40
	SEVSDVFNAVIDGTDATmLSGESANGK	7	1	CID	M18(Oxidation)	34.5144	0.631401	0	1	2	2730.24	1.0288	4688	4688	76.2954	MS2	10/52
	TELFEGEAK	6	1	CID		9.19713	0.470779	0	1	2	1023.51	9.09915	5176	5176	82.1418	MS2	4/16
gi307127859	14.92	5	630	9.72623	endopeptidase O [Streptococcus pneumoniae 670-6B]
	Sequence	# Proteins	# Protein Groups	Activation Type	Modifications	Probability	XCorr	Δ Score	Rank	Charge	MH+ [Da]	ΔM [ppm]	First Scan	Last Scan	RT [min]	MSOrder	Ions Matched	Annotation
	WLAGEEVPEDAILENFVK	9	1	CID		131.498	4.03708	0	1	2	2059.04	-0.716045	5057	5057	80.8132	MS2	23/34
	SQTGGFVDLDQEIEDLmLATTDK	9	1	CID	M17(Oxidation)	129.66	2.99042	0	1	2	2542.19	-1.04183	5117	5117	81.5018	MS2	22/44
	AYDFSDEEIEDLLEK	9	1	CID		111.563	2.69872	0	1	2	1815.82	-0.951592	4392	4392	72.9192	MS2	16/28
	YQDDFYDAINGEWQQTAEIPADK	8	1	CID		34.4441	0.834867	0	1	2	2717.2	-0.52667	4059	4059	69.2721	MS2	11/44
	nDWLTPETCKQAIVK	9	1	CID	N1(Deamidated)	5.0896	0.704921	0.827556	2	2	1746.89	13.3449	1557	1557	42.2881	MS2	5/28
gi15900202	11.48	10	1280	9.48817	alkaline amylopullulanase, [Streptococcus pneumoniae TIGR4]
	Sequence	# Proteins	# Protein Groups	Activation Type	Modifications	Probability	XCorr	Δ Score	Rank	Charge	MH+ [Da]	ΔM [ppm]	First Scan	Last Scan	RT [min]	MSOrder	Ions Matched	Annotation
	VADAENKPSQATADSQAEQPAQEAQASSVK	9	1	CID		102.82	5.40034	0	1	3	3056.44	0.867032	813	813	33.8072	MS2	37/116
	NTTTLAQPLTDTAAGSGK	12	2	CID		65.2005	4.08783	0	1	2	1746.89	-0.389092	1557	1557	42.2881	MS2	21/34
	DKDGNPFDYPYFIHDSYDSSDAVNK	13	2	CID		4.73459	1.69884	0	1	4	2909.25	-1.42126	3617	3617	64.4671	MS2	19/144
	nAEVLADEnqAGPVGIANPK	1	1	CID	N1(Deamidated) N9(Deamidated) Q10(Deamidated)	2.56797	1.33079	0	1	3	2009.95	-14.686	946	946	35.4362	MS2	12/76
	NESDISSPGnANASLEK	4	1	CID	N10(Deamidated)	8.06214	1.12689	0	1	2	1733.8	15.2698	3931	3931	67.8244	MS2	9/32
	NESDISSPGNAnASLEK	4	1	CID	N12(Deamidated)	8.06214	1.05565	0.0632209	2	2	1733.8	15.2698	3931	3931	67.8244	MS2	7/32
	nESDISSPGNANASLEK	4	1	CID	N1(Deamidated)	8.06214	0.950127	0.156861	3	2	1733.8	15.2698	3931	3931	67.8244	MS2	9/32
	nESDISSPGnAnASLEKTEEKPAASPADPAPQTGQDR	3	1	CID	N1(Deamidated) N10(Deamidated) N12(Deamidated)	4.26926	0.801452	0.140564	4	3	3782.7	-13.8264	3027	3027	58.2361	MS2	17/144
	DDDESIYTNPYYVHDIR	13	2	CID		27.44	0.572084	0	1	2	2114.93	-2.41933	2534	2534	52.9563	MS2	5/32
	DGnPFDYPYFIHDSYDSSDAVnK	13	2	CID	N3(Deamidated) N22(Deamidated)	2.41857	0.415902	0	1	3	2668.1	-4.01395	3616	3616	64.4609	MS2	9/88
gi307126580	11.92	14	1770	8.80265	endo-alpha-N-acetylgalactosaminidase [Streptococcus pneumoniae 670-6B]
	Sequence	# Proteins	# Protein Groups	Activation Type	Modifications	Probability	XCorr	Δ Score	Rank	Charge	MH+ [Da]	ΔM [ppm]	First Scan	Last Scan	RT [min]	MSOrder	Ions Matched	Annotation
	SDGQLNASNNDVNLFDTVTLPAAVNDHLK	11	2	CID		98.7945	3.9637	0	1	3	3082.51	3.59436	4324	4324	72.1832	MS2	29/112
	GYNDFmmDNLQIEEITLTGK	11	3	CID	M6(Oxidation) M7(Oxidation)	60.873	2.77056	0	1	2	2364.07	-4.3619	3841	3841	66.8461	MS2	15/38
	WENGTPVTmTDNGSTYK	12	3	CID	M9(Oxidation)	26.8644	2.06838	0	1	2	1916.84	5.14813	1125	1125	37.5852	MS2	14/32
	QTNPEmSWSEGmHIYDQGFNSGTLK	12	3	CID	M6(Oxidation) M12(Oxidation)	54.1572	1.38661	0	1	3	2889.25	0.332462	3024	3024	58.1853	MS2	18/96
	TEEELLALEK	12	3	CID		13.6716	1.25107	0	1	2	1174.62	0.431768	2301	2301	50.3303	MS2	8/18
	DGWFWEYKTPGNSTWYKGnR	2	2	CID	N19(Deamidated)	9.45715	0.845175	0.235595	3	3	2493.13	6.07486	5739	5739	90.8472	MS2	9/76
	SNDVNSPQYRER	11	2	CID		11.9678	0.727054	0	1	2	1464.69	5.02837	3299	3299	61.0814	MS2	6/22
	NYLPTVAMTNYTK	12	3	CID		2.02873	0.616491	0	1	2	1515.76	3.94325	2613	2613	53.7487	MS2	6/24
	NYLPTVAmTnYTK	12	3	CID	M8(Oxidation) N10(Deamidated)	9.68149	0.577964	0	1	3	1532.74	14.1956	1347	1347	39.982	MS2	8/48
	TFENNSSMYGDKHDTGKGTFK	10	2	CID		3.48156	0.518243	0.812947	2	2	2364.07	12.9481	3841	3841	66.8461	MS2	5/40
	FDGATmSNNTHVSGDDHIDVTNPmK	12	3	CID	M6(Oxidation) M24(Oxidation)	3.20949	0.480102	0	1	4	2735.17	0.311945	1170	1170	38.0162	MS2	19/144
	VIqDGSAYLTPWnWDANGK	12	3	CID	Q3(Deamidated) N13(Deamidated)	5.5405	0.479866	0.267894	2	2	2136.99	0.721408	2334	2334	50.7045	MS2	5/36
	nYLPTVAmTNYTK	12	3	CID	N1(Deamidated) M8(Oxidation)	9.68149	0.433141	0.250576	2	3	1532.74	14.1956	1347	1347	39.982	MS2	8/48
	NYLPTVAMTNYTK	12	3	CID		10.7989	0.416554	0	1	2	1515.75	0.403213	3236	3236	60.4881	MS2	4/24
gi169834511	11.65	14	1743	8.80265	endo-alpha-N-acetylgalactosaminidase [Streptococcus pneumoniae Hungary19A-6]
	Sequence	# Proteins	# Protein Groups	Activation Type	Modifications	Probability	XCorr	Δ Score	Rank	Charge	MH+ [Da]	ΔM [ppm]	First Scan	Last Scan	RT [min]	MSOrder	Ions Matched	Annotation
	SDGQLNASNNDVNLFDTVTLPAAVNDHLK	11	2	CID		98.7945	3.9637	0	1	3	3082.51	3.59436	4324	4324	72.1832	MS2	29/112
	GYNDFmmDNLQIEEITLTGK	11	3	CID	M6(Oxidation) M7(Oxidation)	60.873	2.77056	0	1	2	2364.07	-4.3619	3841	3841	66.8461	MS2	15/38
	WENGTPVTmTDNGSTYK	12	3	CID	M9(Oxidation)	26.8644	2.06838	0	1	2	1916.84	5.14813	1125	1125	37.5852	MS2	14/32
	QTNPEmSWSEGmHIYDQGFNSGTLK	12	3	CID	M6(Oxidation) M12(Oxidation)	54.1572	1.38661	0	1	3	2889.25	0.332462	3024	3024	58.1853	MS2	18/96
	TEEELLALEK	12	3	CID		13.6716	1.25107	0	1	2	1174.62	0.431768	2301	2301	50.3303	MS2	8/18
	DIDFGKTIKAKK	11	2	CID		2.43345	0.814244	0	1	3	1363.8	9.4769	3635	3635	64.6229	MS2	11/44
	SNDVNSPQYRER	11	2	CID		11.9678	0.727054	0	1	2	1464.69	5.02837	3299	3299	61.0814	MS2	6/22
	NYLPTVAMTNYTK	12	3	CID		2.02873	0.616491	0	1	2	1515.76	3.94325	2613	2613	53.7487	MS2	6/24
	NYLPTVAmTnYTK	12	3	CID	M8(Oxidation) N10(Deamidated)	9.68149	0.577964	0	1	3	1532.74	14.1956	1347	1347	39.982	MS2	8/48
	TFENNSSMYGDKHDTGKGTFK	10	2	CID		3.48156	0.518243	0.812947	2	2	2364.07	12.9481	3841	3841	66.8461	MS2	5/40
	FDGATmSNNTHVSGDDHIDVTNPmK	12	3	CID	M6(Oxidation) M24(Oxidation)	3.20949	0.480102	0	1	4	2735.17	0.311945	1170	1170	38.0162	MS2	19/144
	VIqDGSAYLTPWnWDANGK	12	3	CID	Q3(Deamidated) N13(Deamidated)	5.5405	0.479866	0.267894	2	2	2136.99	0.721408	2334	2334	50.7045	MS2	5/36
	nYLPTVAmTNYTK	12	3	CID	N1(Deamidated) M8(Oxidation)	9.68149	0.433141	0.250576	2	3	1532.74	14.1956	1347	1347	39.982	MS2	8/48
	NYLPTVAMTNYTK	12	3	CID		10.7989	0.416554	0	1	2	1515.75	0.403213	3236	3236	60.4881	MS2	4/24
gi225857977	17.91	3	268	8.76168	ABC transporter solute-binding protein - amino acid transport [Streptococcus pneumoniae 70585]
	Sequence	# Proteins	# Protein Groups	Activation Type	Modifications	Probability	XCorr	Δ Score	Rank	Charge	MH+ [Da]	ΔM [ppm]	First Scan	Last Scan	RT [min]	MSOrder	Ions Matched	Annotation
	GFVENNPDLAIADLNFEK	9	3	CID		124.083	3.34343	0	1	2	2005.99	-1.37421	4112	4112	69.8348	MS2	23/34
	SGQVDAVIFEEPVSK	3	1	CID		77.2011	3.2622	0	1	2	1604.82	-0.135381	2708	2708	54.7657	MS2	19/28
	SDLTTYQSVNDLAQK	2	1	CID		63.172	2.15605	0	1	2	1682.82	0.0684863	1958	1958	46.6799	MS2	15/28
gi307126713	17.14	15	1622	8.61271	endo-beta-N-acetylglucosaminidase D [Streptococcus pneumoniae 670-6B]
	Sequence	# Proteins	# Protein Groups	Activation Type	Modifications	Probability	XCorr	Δ Score	Rank	Charge	MH+ [Da]	ΔM [ppm]	First Scan	Last Scan	RT [min]	MSOrder	Ions Matched	Annotation
	AEGVATASETAEAASAAKPEEK	4	1	CID		300	2.86593	0	1	2	2118.02	3.17552	1165	1165	37.97	MS2	22/42
	TGEDYHKNEDIFFTGYQGDPTGQKPGDKDWYGIANLVADR	13	1	CID		53.4559	2.42658	0	1	5	4518.09	-0.752009	4360	4360	72.58	MS2	56/312
	SEVGGDLASAPLDLTNQSGLLYYR	12	1	CID		45.6368	2.22395	0	1	2	2539.27	2.98411	4269	4269	71.5655	MS2	17/46
	ELTLSDNWTNEEFDLSSLAGK	12	1	CID		3.77618	1.83651	0	1	2	2369.11	-1.34659	4676	4676	76.1753	MS2	6/40
	TEGGEGIEGmLNGTITSLSDK	11	1	CID	M10(Oxidation)	45.5723	1.68632	0	1	2	2125	-0.00667	3401	3401	62.2485	MS2	13/40
	LTGEVQELLAAKPNHPSGSALAPLLEK	8	1	CID		9.96192	1.65155	0	1	4	2783.53	2.79046	3966	3966	68.1824	MS2	31/156
	FAVAYSNDTmEEHSFTDEGVEISGYDAQK	12	1	CID	M10(Oxidation)	5.15641	1.29824	0	1	3	3256.39	2.2708	2983	2983	57.72	MS2	14/112
	AIEAAEQVLK	12	1	CID		15.9181	1.29022	0	1	2	1071.6	-0.0935841	1607	1607	42.8015	MS2	12/18
	AEGVATASETAEAASAAKPEEK	4	1	CID		10.4802	1.00653	0	1	3	2118.02	0.110313	1129	1129	37.6241	MS2	14/84
	GQDVDLSYASIVK	12	1	CID		17.6631	0.727189	0	1	2	1394.72	-0.251318	2583	2583	53.4872	MS2	9/24
	GLKVERVQASAEEK	12	1	CID		10.2235	0.641007	0.326891	2	2	1543.86	13.4161	4547	4547	74.738	MS2	4/26
	KDYLVGDSLDLSEGR	12	1	CID		10.8995	0.622997	0	1	3	1666.83	0.682345	2567	2567	53.3051	MS2	9/56
	VPADNFFAnFnWDKAK	12	1	CID	N9(Deamidated) N11(Deamidated)	3.38705	0.608217	0.037725	3	3	1885.88	8.31199	6188	6188	98.2553	MS2	13/60
	LEVqEEKVAFHR	12	1	CID	Q4(Deamidated)	4.70595	0.601834	0	1	3	1485.78	12.3293	623	623	30.6672	MS2	8/44
	QNEGEHTREnKLEK	3	1	CID	N10(Deamidated)	12.7267	0.402206	0	1	2	1712.82	2.79213	1962	1962	46.7187	MS2	4/26
gi307126552	15.12	10	701	8.60659	ATP-dependent protease ATP-binding subunit ClpL [Streptococcus pneumoniae 670-6B]
	Sequence	# Proteins	# Protein Groups	Activation Type	Modifications	Probability	XCorr	Δ Score	Rank	Charge	MH+ [Da]	ΔM [ppm]	First Scan	Last Scan	RT [min]	MSOrder	Ions Matched	Annotation
	ATGQLPGNAETDVQmPQQASGmK	8	2	CID	M15(Oxidation) M22(Oxidation)	96.7422	2.78572	0	1	2	2391.09	-0.0309669	1066	1066	36.9144	MS2	19/44
	HLEADmEDGVLVIR	9	2	CID	M6(Oxidation)	30.4831	2.21124	0	1	3	1612.8	1.33842	2228	2228	49.5783	MS2	18/52
	HLEADmEDGVLVIR	9	2	CID	M6(Oxidation)	54.5013	1.84105	0	1	2	1612.8	-0.784365	2232	2232	49.617	MS2	11/26
	TAVVEGLAQAIVNGDVPAAIK	11	2	CID		11.9316	1.76858	0	1	2	2036.14	-3.4498	4832	4832	77.9802	MS2	9/40
	ATGQLPGNAETDVQmPQQASGmK	8	2	CID	M15(Oxidation) M22(Oxidation)	44.8148	1.1933	0	1	2	2391.09	2.41044	1341	1341	39.929	MS2	10/44
	TRIAELERKIEnHTEDmK	7	2	CID	N12(Deamidated) M17(Oxidation)	4.07819	0.760729	0	1	2	2230.12	6.58835	4509	4509	74.2803	MS2	7/34
	IEnHTEDMKVTASVnDVAESVER	11	2	CID	N3(Deamidated) N15(Deamidated)	13.5404	0.583638	0	1	2	2575.18	-1.49922	6154	6154	97.6448	MS2	8/44
	mTGIPVSQMGASDIER	9	1	CID	M1(Oxidation)	10.0902	0.506694	0	1	3	1707.79	-12.7813	382	382	22.4275	MS2	7/60
	mTGIPVSQMGASDIER	9	1	CID	M1(Oxidation)	8.30793	0.49331	0	1	3	1707.79	-12.4151	271	271	16.9178	MS2	7/60
	MTGIPVSQmGASDIER	9	1	CID	M9(Oxidation)	10.0902	0.487263	0.0383493	2	3	1707.79	-12.7813	382	382	22.4275	MS2	7/60
gi15900269	16.12	8	701	8.60659	ATP-dependent Clp protease ATP-binding subunit, [Streptococcus pneumoniae TIGR4]
	Sequence	# Proteins	# Protein Groups	Activation Type	Modifications	Probability	XCorr	Δ Score	Rank	Charge	MH+ [Da]	ΔM [ppm]	First Scan	Last Scan	RT [min]	MSOrder	Ions Matched	Annotation
	ATGQLPGNAETDVQmPQQASGmK	8	2	CID	M15(Oxidation) M22(Oxidation)	96.7422	2.78572	0	1	2	2391.09	-0.0309669	1066	1066	36.9144	MS2	19/44
	HLEADmEDGVLVIR	9	2	CID	M6(Oxidation)	30.4831	2.21124	0	1	3	1612.8	1.33842	2228	2228	49.5783	MS2	18/52
	HLEADmEDGVLVIR	9	2	CID	M6(Oxidation)	54.5013	1.84105	0	1	2	1612.8	-0.784365	2232	2232	49.617	MS2	11/26
	TAVVEGLAQAIVNGDVPAAIK	11	2	CID		11.9316	1.76858	0	1	2	2036.14	-3.4498	4832	4832	77.9802	MS2	9/40
	ATGQLPGNAETDVQmPQQASGmK	8	2	CID	M15(Oxidation) M22(Oxidation)	44.8148	1.1933	0	1	2	2391.09	2.41044	1341	1341	39.929	MS2	10/44
	MTGIPVSqMEASDIERLKDmAHR	1	1	CID	Q8(Deamidated) M20(Oxidation)	5.78149	0.870624	0.2135	2	3	2632.23	-21.0156	5180	5180	82.1791	MS2	11/88
	TRIAELERKIEnHTEDmK	7	2	CID	N12(Deamidated) M17(Oxidation)	4.07819	0.760729	0	1	2	2230.12	6.58835	4509	4509	74.2803	MS2	7/34
	IEnHTEDMKVTASVnDVAESVER	11	2	CID	N3(Deamidated) N15(Deamidated)	13.5404	0.583638	0	1	2	2575.18	-1.49922	6154	6154	97.6448	MS2	8/44
gi307126432	6.14	5	277	8.5176	50S ribosomal protein L2 [Streptococcus pneumoniae 670-6B]
	Sequence	# Proteins	# Protein Groups	Activation Type	Modifications	Probability	XCorr	Δ Score	Rank	Charge	MH+ [Da]	ΔM [ppm]	First Scan	Last Scan	RT [min]	MSOrder	Ions Matched	Annotation
	NmTSLDFAEITTSTPEK	1	1	CID	M2(Oxidation)	97.7998	3.51904	0	1	2	1900.88	-0.333428	2877	2877	56.6337	MS2	24/32
	NmTSLDFAEITTSTPEK	1	1	CID	M2(Oxidation)	86.0442	3.19711	0	1	2	1900.89	0.643135	3159	3159	59.6576	MS2	19/32
	NmTSLDFAEITTSTPEK	1	1	CID	M2(Oxidation)	28.5499	1.80145	0	1	2	1900.88	-1.30999	3468	3468	62.9649	MS2	9/32
	NmTSLDFAEITTSTPEK	1	1	CID	M2(Oxidation)	7.25975	1.22335	0	1	2	1900.89	4.54938	3992	3992	68.4606	MS2	7/32
	NmTSLDFAEITTSTPEK	1	1	CID	M2(Oxidation)	2.20154	0.494598	0	1	2	1900.88	-2.53069	6262	6262	100.231	MS2	8/32
gi307126445	22.03	3	118	8.51314	50S ribosomal protein L18 [Streptococcus pneumoniae 670-6B]
	Sequence	# Proteins	# Protein Groups	Activation Type	Modifications	Probability	XCorr	Δ Score	Rank	Charge	MH+ [Da]	ΔM [ppm]	First Scan	Last Scan	RT [min]	MSOrder	Ions Matched	Annotation
	SNTGIYAQVIDDVAGVTLASASTLDK	2	1	CID		74.1682	3.33293	0	1	2	2609.33	-3.6294	5443	5443	86.2026	MS2	19/50
	SNTGIYAQVIDDVAGVTLASASTLDK	2	1	CID		46.9784	2.87965	0	1	2	2609.33	-3.38526	5918	5918	93.7759	MS2	16/50
	SNTGIYAQVIDDVAGVTLASASTLDK	2	1	CID		47.6964	2.30055	0	1	2	2609.33	-2.65284	5684	5684	89.9084	MS2	16/50
gi182684113	9.01	14	1908	8.33404	immunoglobulin A1 protease [Streptococcus pneumoniae CGSP14]
	Sequence	# Proteins	# Protein Groups	Activation Type	Modifications	Probability	XCorr	Δ Score	Rank	Charge	MH+ [Da]	ΔM [ppm]	First Scan	Last Scan	RT [min]	MSOrder	Ions Matched	Annotation
	GEPAVQPELPEAVVSDK	2	2	CID		85.7833	3.07048	0	1	2	1764.9	0.259697	2402	2402	51.4726	MS2	17/32
	DVQSGAIVEPAIQPELPEAVVSDK	8	6	CID		73.8347	2.97021	0	2	2	2491.29	1.71989	3494	3494	63.2168	MS2	17/46
	DVQSGAIVEPAIQPELPEAVVSDK	8	6	CID		24.5243	2.29335	0	2	2	2491.29	-1.20979	3782	3782	66.2355	MS2	14/46
	TGVNTLNPQDEVLSGQLNKPELLYR	12	8	CID		10.5751	1.73555	0	1	3	2798.48	8.7957	3511	3511	63.3804	MS2	14/96
	IEQPSAEDTKPENEASSTNGESERPK	2	2	CID		3.7041	1.50886	0	1	5	2830.29	-4.6684	1524	1524	41.9668	MS2	30/200
	GYKEGMVPYISNQYEK	2	2	CID		18.6319	1.4702	0.375437	2	2	1905.92	14.6661	2959	2959	57.4825	MS2	6/30
	LMYTPnTMLHDYNnIVK	1	1	CID	N6(Deamidated) N14(Deamidated)	4.38434	0.89765	0	1	3	2068.95	-20.3821	3514	3514	63.4141	MS2	10/64
	TGVNTLNPQDEVLSGQLNKPELLYR	12	8	CID		4.18094	0.878502	0	1	3	2798.47	1.47149	4097	4097	69.6645	MS2	10/96
	NNEVITDINKNKQEINK	2	2	CID		2.09499	0.877202	0.624748	2	2	2014.05	-5.97866	4026	4026	68.8672	MS2	8/32
	LMYTPNTMLHDYnnIVK	1	1	CID	N13(Deamidated) N14(Deamidated)	4.38434	0.868764	0.0321799	2	3	2068.95	-20.3821	3514	3514	63.4141	MS2	12/64
	TGVNTLNPQDEVLSGQLNKPELLYR	12	8	CID		28.2259	0.564565	0	1	2	2798.47	6.00153	3537	3537	63.6416	MS2	11/48
	LTmDEVNK	2	2	CID	M3(Oxidation)	5.46594	0.52262	0	1	2	965.457	-3.49228	1475	1475	41.3968	MS2	6/14
	YYAIYNLK	5	3	CID		4.39373	0.518088	0	1	2	1047.55	-3.42835	3558	3558	63.841	MS2	7/14
	FVEDNAKEAAKRFR	1	1	CID		2.79729	0.408114	0.726473	2	2	1680.89	9.07337	2369	2369	51.0976	MS2	6/26
gi169834496	12.58	7	612	8.22413	AmiA protein [Streptococcus pneumoniae Hungary19A-6]
	Sequence	# Proteins	# Protein Groups	Activation Type	Modifications	Probability	XCorr	Δ Score	Rank	Charge	MH+ [Da]	ΔM [ppm]	First Scan	Last Scan	RT [min]	MSOrder	Ions Matched	Annotation
	GVNLADGQDGLFNADK	9	1	CID		131.292	4.02877	0	1	2	1633.78	-0.677842	2604	2604	53.6697	MS2	22/30
	ALEADGVQFPIHLDVPVDQASK	9	1	CID		34.1513	2.14943	0	1	3	2349.21	2.47242	4091	4091	69.6124	MS2	21/84
	ALEADGVQFPIHLDVPVDQASK	9	1	CID		85.2527	2.04594	0	1	2	2349.21	1.1431	4136	4136	70.0917	MS2	18/42
	AVDDYTLQYTLNQPEPFWNSK	9	1	CID		47.2693	1.48896	0	1	2	2529.2	6.67747	4183	4183	70.6945	MS2	15/40
	ALEADGVQFPIHLDVPVDQASK	9	1	CID		13.3679	1.219	0	1	3	2349.21	-0.0910539	4378	4378	72.7513	MS2	16/84
	GVNLADGQDGLFNADK	9	1	CID		32.1766	1.10603	0	1	2	1633.78	-4.21788	2996	2996	57.8429	MS2	8/30
	QSYNYTSKTTDSEKVATK	9	1	CID		4.84809	0.927881	0	1	2	2051	3.09591	3937	3937	67.8747	MS2	6/34
gi307127469	24.28	7	313	7.97586	foldase protein PrsA [Streptococcus pneumoniae 670-6B]
	Sequence	# Proteins	# Protein Groups	Activation Type	Modifications	Probability	XCorr	Δ Score	Rank	Charge	MH+ [Da]	ΔM [ppm]	First Scan	Last Scan	RT [min]	MSOrder	Ions Matched	Annotation
	QYGSELDDKEVDDTIAEEK	5	1	CID		63.3897	2.22109	0	1	3	2183.98	0.203009	1988	1988	46.9921	MS2	23/72
	QYGSELDDKEVDDTIAEEK	5	1	CID		87.7166	2.17058	0	1	2	2183.98	-3.44565	1964	1964	46.7307	MS2	12/36
	TKENGGEITFDSASTEVPEQVK	4	1	CID		36.1336	1.9174	0	1	2	2366.15	9.89825	2134	2134	48.6117	MS2	15/42
	GDVITEHQFYEQVK	5	1	CID		21.9742	1.63756	0	1	3	1692.82	-0.531523	2081	2081	48.0082	MS2	18/52
	AFDEYTPDVTAqIIRLNNEDK	5	1	CID	Q12(Deamidated)	6.92334	0.913295	0.371312	2	2	2453.18	-3.19806	4750	4750	77.0318	MS2	8/40
	ENGGEITFDSASTEVPEQVK	4	1	CID		33.1242	0.65546	0	1	2	2136.99	-5.16659	2334	2334	50.7045	MS2	10/38
	AFDEYTPDVTAQIIRLNnEDK	5	1	CID	N18(Deamidated)	2.06872	0.446433	0.692688	4	2	2453.18	-3.19806	4750	4750	77.0318	MS2	5/40
gi225859303	8.92	11	1985	7.93367	G5 domain family [Streptococcus pneumoniae 70585]
	Sequence	# Proteins	# Protein Groups	Activation Type	Modifications	Probability	XCorr	Δ Score	Rank	Charge	MH+ [Da]	ΔM [ppm]	First Scan	Last Scan	RT [min]	MSOrder	Ions Matched	Annotation
	DNGDGTHTITVQNPDGSESTTVVK	4	4	CID		78.76	3.84552	0	1	3	2472.15	-1.20828	1362	1362	40.1504	MS2	31/92
	VTVYDDVNDNGVYDGGVDK	2	2	CID		83.8931	2.35881	0	1	2	2043.92	1.32364	1956	1956	46.6537	MS2	12/36
	DNGDGSHTIVITNPEGVTTETTVR	5	5	CID		18.7693	1.72934	0	1	2	2513.22	6.29974	2160	2160	48.8982	MS2	15/46
	VYVEDPARPGQPLNPNQPLATITDGR	2	2	CID		12.3625	1.45155	0	1	3	2818.45	-1.12256	3066	3066	58.6543	MS2	16/100
	VVDNGDGTHTITVVNSDGTTTTTTVR	4	4	CID		13.8149	1.39604	0	1	3	2661.3	2.67305	1419	1419	40.7831	MS2	18/100
	VDFSIRYSGPGEFVNNNFILDK	1	1	CID		3.40165	1.14457	0	1	3	2531.24	-13.0569	3848	3848	66.9028	MS2	14/84
	DnGDGTHTITVQnPDGSESTTVVK	4	4	CID	N2(Deamidated) N13(Deamidated)	7.59945	1.09915	0.604909	2	3	2474.11	-6.53276	979	979	35.8533	MS2	13/92
	GQDGQSTVVTITTPGKDPVTFTVK	2	2	CID		12.945	0.707721	0.119223	2	3	2476.29	-3.12016	3111	3111	59.1279	MS2	12/92
	DnGDGTHTITVqNPDGSESTTVVK	4	4	CID	N2(Deamidated) Q12(Deamidated)	7.59945	0.694251	0.75045	3	3	2474.11	-6.53276	979	979	35.8533	MS2	12/92
	DNGDGTHTITVqnPDGSESTTVVK	4	4	CID	Q12(Deamidated) N13(Deamidated)	2.96451	0.612024	0.780007	4	3	2474.11	-6.53276	979	979	35.8533	MS2	10/92
	DGENGLNGKTPK	4	4	CID		2.50841	0.609293	0	1	2	1229.62	10.1187	1449	1449	41.1002	MS2	6/22
gi225861379	9.56	16	1873	7.93367	G5 domain family [Streptococcus pneumoniae Taiwan19F-14]
	Sequence	# Proteins	# Protein Groups	Activation Type	Modifications	Probability	XCorr	Δ Score	Rank	Charge	MH+ [Da]	ΔM [ppm]	First Scan	Last Scan	RT [min]	MSOrder	Ions Matched	Annotation
	DNGDGTHTITVQNPDGSESTTVVK	4	4	CID		78.76	3.84552	0	1	3	2472.15	-1.20828	1362	1362	40.1504	MS2	31/92
	VTVYDDVNDNGVYDGGVDK	2	2	CID		83.8931	2.35881	0	1	2	2043.92	1.32364	1956	1956	46.6537	MS2	12/36
	DGAqGPKGEQGNPGTPGKDGK	1	1	CID	Q4(Deamidated)	4.97194	1.88857	0.145778	2	3	1995.94	-0.0166047	2784	2784	55.6311	MS2	20/80
	DGAQGPKGEQGnPGTPGKDGK	1	1	CID	N12(Deamidated)	4.97194	1.83032	0.172127	3	3	1995.94	-0.0166047	2784	2784	55.6311	MS2	21/80
	DNGDGSHTIVITNPEGVTTETTVR	5	5	CID		18.7693	1.72934	0	1	2	2513.22	6.29974	2160	2160	48.8982	MS2	15/46
	VYVEDPARPGQPLNPNQPLATITDGR	2	2	CID		12.3625	1.45155	0	1	3	2818.45	-1.12256	3066	3066	58.6543	MS2	16/100
	VVDNGDGTHTITVVNSDGTTTTTTVR	4	4	CID		13.8149	1.39604	0	1	3	2661.3	2.67305	1419	1419	40.7831	MS2	18/100
	DnGDGTHTITVQnPDGSESTTVVK	4	4	CID	N2(Deamidated) N13(Deamidated)	7.59945	1.09915	0.604909	2	3	2474.11	-6.53276	979	979	35.8533	MS2	13/92
	VVDNGDGTHTITVVnSDGTTTTTTVRYGR	1	1	CID	N15(Deamidated)	3.26122	0.877261	0	1	3	3038.47	5.47654	5539	5539	87.7033	MS2	15/112
	GQDGQSTVVTITTPGKDPVTFTVK	2	2	CID		12.945	0.707721	0.119223	2	3	2476.29	-3.12016	3111	3111	59.1279	MS2	12/92
	DnGDGTHTITVqNPDGSESTTVVK	4	4	CID	N2(Deamidated) Q12(Deamidated)	7.59945	0.694251	0.75045	3	3	2474.11	-6.53276	979	979	35.8533	MS2	12/92
	DGAqGPKGEQGNPGTPGKDGK	1	1	CID	Q4(Deamidated)	3.0425	0.613776	0	1	3	1995.94	2.54687	3131	3131	59.3204	MS2	17/80
	DNGDGTHTITVqnPDGSESTTVVK	4	4	CID	Q12(Deamidated) N13(Deamidated)	2.96451	0.612024	0.780007	4	3	2474.11	-6.53276	979	979	35.8533	MS2	10/92
	DGENGLNGKTPK	4	4	CID		2.50841	0.609293	0	1	2	1229.62	10.1187	1449	1449	41.1002	MS2	6/22
	DGAQGPKGEQGnPGTPGKDGK	1	1	CID	N12(Deamidated)	3.0425	0.569674	0.0718544	2	3	1995.94	2.54687	3131	3131	59.3204	MS2	17/80
	DGAQGPKGEqGNPGTPGKDGK	1	1	CID	Q10(Deamidated)	3.0425	0.517973	0.156088	3	3	1995.94	2.54687	3131	3131	59.3204	MS2	17/80
gi307127866	32.17	13	230	7.74108	2,3-bisphosphoglycerate-dependent phosphoglycerate mutase [Streptococcus pneumoniae 670-6B]
	Sequence	# Proteins	# Protein Groups	Activation Type	Modifications	Probability	XCorr	Δ Score	Rank	Charge	MH+ [Da]	ΔM [ppm]	First Scan	Last Scan	RT [min]	MSOrder	Ions Matched	Annotation
	AEAAEQFGDEQVHIWR	2	2	CID		115.966	3.53382	0	1	2	1885.88	0.62915	2689	2689	54.5671	MS2	18/30
	TTNLALEASDQLWVPVEK	2	2	CID		63.1552	2.33763	0	1	2	2014.05	1.22134	4026	4026	68.8672	MS2	15/34
	SYDVLPPNmDRDDEHSAHTDR	2	2	CID	M9(Oxidation)	9.85946	1.92588	0	1	4	2486.07	5.67241	930	930	35.2656	MS2	23/120
	EAGIEFDQAYTSVLK	1	1	CID		24.1882	1.86963	0	1	2	1670.82	-4.09358	3453	3453	62.7965	MS2	7/28
	RSYDVLPPNmDRDDEHSAHTDR	2	2	CID	M10(Oxidation)	31.9788	1.47392	0	1	4	2642.16	-0.476883	839	839	34.1132	MS2	25/126
	AEAAEQFGDEQVHIWR	2	2	CID		5.8673	1.29875	0	1	3	1885.88	1.83641	2906	2906	56.9529	MS2	14/60
	SYDVLPPNmDRDDEHSAHTDR	2	2	CID	M9(Oxidation)	40.5038	1.19785	0	1	4	2486.06	-0.919383	1195	1195	38.3019	MS2	21/120
	TTNLALEASDQLWVPVEK	2	2	CID		4.06465	0.889162	0	1	2	2014.05	1.83169	4334	4334	72.2763	MS2	9/34
	SYDVLPPNmDRDDEHSAHTDR	2	2	CID	M9(Oxidation)	36.4539	0.694729	0	1	3	2486.06	-2.0656	948	948	35.4682	MS2	14/80
	AEAAEQFGDEQVHIWR	2	2	CID		3.38705	0.618876	0.0208607	2	3	1885.88	1.10399	6188	6188	98.2553	MS2	11/60
	nKAEAAEQFGDEqVHIWR	2	2	CID	N1(Deamidated) Q13(Deamidated)	2.81537	0.600892	0	1	2	2130	15.6688	1631	1631	43.0698	MS2	4/34
	SYDVLPPNmDRDDEHSAHTDR	2	2	CID	M9(Oxidation)	6.81681	0.565385	0	1	5	2486.06	0.776155	937	937	35.3447	MS2	23/160
	SYDVLPPNmDRDDEHSAHTDRR	1	1	CID	M9(Oxidation)	6.47095	0.466261	0.0796693	2	3	2642.16	-2.11139	866	866	34.44	MS2	11/84
gi182684530	18.53	7	259	7.58509	triosephosphate isomerase [Streptococcus pneumoniae CGSP14]
	Sequence	# Proteins	# Protein Groups	Activation Type	Modifications	Probability	XCorr	Δ Score	Rank	Charge	MH+ [Da]	ΔM [ppm]	First Scan	Last Scan	RT [min]	MSOrder	Ions Matched	Annotation
	DVVAADFGQEVADKVR	5	1	CID		98.0717	2.62984	0	1	2	1718.87	-0.116162	3007	3007	57.9703	MS2	17/30
	DYFHETDEDINKK	5	1	CID		34.2521	2.6003	0	1	2	1653.74	0.876533	1217	1217	38.5717	MS2	14/24
	DVVAADFGQEVADK	5	1	CID		84.73	2.35495	0	1	2	1463.7	0.112314	2234	2234	49.6437	MS2	17/26
	RDYFHETDEDINKK	5	1	CID		18.5613	1.26379	0	1	4	1809.84	0.681789	1013	1013	36.2284	MS2	24/78
	DYFHETDEDINKK	5	1	CID		2.66908	0.768286	0.196882	2	3	1653.74	4.95244	1359	1359	40.1167	MS2	11/48
	KPFIAGNWKmNKNPqEAK	1	1	CID	M10(Oxidation) Q15(Deamidated)	2.74843	0.666368	0	2	2	2118.09	13.6153	4870	4870	78.4495	MS2	5/34
	KPFIAGNWKmNKnPQEAK	1	1	CID	M10(Oxidation) N13(Deamidated)	2.74843	0.577369	0.133558	3	2	2118.09	13.6153	4870	4870	78.4495	MS2	4/34
gi116515899	4.74	9	2551	7.30771	G5 domain-containing protein [Streptococcus pneumoniae D39]
	Sequence	# Proteins	# Protein Groups	Activation Type	Modifications	Probability	XCorr	Δ Score	Rank	Charge	MH+ [Da]	ΔM [ppm]	First Scan	Last Scan	RT [min]	MSOrder	Ions Matched	Annotation
	DNGDGTHTITVQNPDGSESTTVVK	4	4	CID		78.76	3.84552	0	1	3	2472.15	-1.20828	1362	1362	40.1504	MS2	31/92
	DGDGSYTAGKDELVQTTVVK	3	3	CID		4.67288	1.73285	0	1	2	2083.03	7.10935	1781	1781	44.6629	MS2	11/38
	DNGDGSHTIVITNPEGVTTETTVR	5	5	CID		18.7693	1.72934	0	1	2	2513.22	6.29974	2160	2160	48.8982	MS2	15/46
	GLTGAqGEKGAqGqAGRDGVTPTVTVK	1	1	CID	Q6(Deamidated) Q12(Deamidated) Q14(Deamidated)	6.87099	1.65335	0	1	3	2586.3	2.66958	3631	3631	64.5987	MS2	17/104
	DnGDGTHTITVQnPDGSESTTVVK	4	4	CID	N2(Deamidated) N13(Deamidated)	7.59945	1.09915	0.604909	2	3	2474.11	-6.53276	979	979	35.8533	MS2	13/92
	DTDAAATPTRNGIR	3	3	CID		14.8555	0.956763	0	1	2	1458.74	13.1021	4130	4130	70.0247	MS2	7/26
	DnGDGTHTITVqNPDGSESTTVVK	4	4	CID	N2(Deamidated) Q12(Deamidated)	7.59945	0.694251	0.75045	3	3	2474.11	-6.53276	979	979	35.8533	MS2	12/92
	DNGDGTHTITVqnPDGSESTTVVK	4	4	CID	Q12(Deamidated) N13(Deamidated)	2.96451	0.612024	0.780007	4	3	2474.11	-6.53276	979	979	35.8533	MS2	10/92
	DGENGLNGKTPK	4	4	CID		2.50841	0.609293	0	1	2	1229.62	10.1187	1449	1449	41.1002	MS2	6/22
gi225854988	5.7	9	2105	7.30771	G5 domain family [Streptococcus pneumoniae JJA]
	Sequence	# Proteins	# Protein Groups	Activation Type	Modifications	Probability	XCorr	Δ Score	Rank	Charge	MH+ [Da]	ΔM [ppm]	First Scan	Last Scan	RT [min]	MSOrder	Ions Matched	Annotation
	DNGDGTHTITVQNPDGSESTTVVK	4	4	CID		78.76	3.84552	0	1	3	2472.15	-1.20828	1362	1362	40.1504	MS2	31/92
	DGDGSYTAGKDELVQTTVVK	3	3	CID		4.67288	1.73285	0	1	2	2083.03	7.10935	1781	1781	44.6629	MS2	11/38
	DNGDGSHTIVITNPEGVTTETTVR	5	5	CID		18.7693	1.72934	0	1	2	2513.22	6.29974	2160	2160	48.8982	MS2	15/46
	VVDNGDGTHTITVVNSDGTTTTTTVR	4	4	CID		13.8149	1.39604	0	1	3	2661.3	2.67305	1419	1419	40.7831	MS2	18/100
	DnGDGTHTITVQnPDGSESTTVVK	4	4	CID	N2(Deamidated) N13(Deamidated)	7.59945	1.09915	0.604909	2	3	2474.11	-6.53276	979	979	35.8533	MS2	13/92
	DTDAAATPTRNGIR	3	3	CID		14.8555	0.956763	0	1	2	1458.74	13.1021	4130	4130	70.0247	MS2	7/26
	DnGDGTHTITVqNPDGSESTTVVK	4	4	CID	N2(Deamidated) Q12(Deamidated)	7.59945	0.694251	0.75045	3	3	2474.11	-6.53276	979	979	35.8533	MS2	12/92
	DNGDGTHTITVqnPDGSESTTVVK	4	4	CID	Q12(Deamidated) N13(Deamidated)	2.96451	0.612024	0.780007	4	3	2474.11	-6.53276	979	979	35.8533	MS2	10/92
	DGENGLNGKTPK	4	4	CID		2.50841	0.609293	0	1	2	1229.62	10.1187	1449	1449	41.1002	MS2	6/22
gi182684635	22.04	23	980	7.24451	sialidase A precursor (neuraminidase A) [Streptococcus pneumoniae CGSP14]
	Sequence	# Proteins	# Protein Groups	Activation Type	Modifications	Probability	XCorr	Δ Score	Rank	Charge	MH+ [Da]	ΔM [ppm]	First Scan	Last Scan	RT [min]	MSOrder	Ions Matched	Annotation
	GEFAYNSLQELGNGEYGILYEHTEK	13	4	CID		34.3996	2.72393	0	1	3	2861.33	0.346114	4187	4187	70.751	MS2	24/96
	TLLFAVDKEDIGQEIIGIAK	10	4	CID		28.7282	2.43983	0	1	3	2173.21	0.366915	4752	4752	77.0594	MS2	22/76
	DLENVETVIEKEDVETNASNGQR	12	4	CID		66.9708	2.08074	0	1	2	2589.22	-2.92433	3051	3051	58.4734	MS2	11/44
	VDLSSELDKLK	13	4	CID		3.54725	1.55802	0	1	3	1246.69	1.4315	2830	2830	56.1346	MS2	16/40
	DmPDVTHVQIGATK	11	3	CID	M2(Oxidation)	11.0303	1.38263	0	1	3	1527.75	0.163341	1133	1133	37.6615	MS2	17/52
	AQNTESTVVQLNNGDVK	13	4	CID		11.2544	0.990206	0	1	2	1816.9	1.21145	1507	1507	41.755	MS2	8/32
	RANNTVWGSNLqIqnLTVYnR	1	1	CID	Q12(Deamidated) Q14(Deamidated) N15(Deamidated) N20(Deamidated)	4.75424	0.875842	0.707098	2	3	2465.19	-19.1898	2901	2901	56.8934	MS2	18/80
	RANNTVWGSnLqIqNLTVYnR	1	1	CID	N10(Deamidated) Q12(Deamidated) Q14(Deamidated) N20(Deamidated)	4.75424	0.825541	0.72392	3	3	2465.19	-19.1898	2901	2901	56.8934	MS2	17/80
	RANNTVWGSnLQIqnLTVYnR	1	1	CID	N10(Deamidated) Q14(Deamidated) N15(Deamidated) N20(Deamidated)	4.75424	0.816965	0.726788	4	3	2465.19	-19.1898	2901	2901	56.8934	MS2	18/80
	RANNTVWGSnLqIQnLTVYnR	1	1	CID	N10(Deamidated) Q12(Deamidated) N15(Deamidated) N20(Deamidated)	4.75424	0.798694	0.732898	5	3	2465.19	-19.1898	2901	2901	56.8934	MS2	17/80
	DmPDVTHVQIGATKR	11	3	CID	M2(Oxidation)	9.8081	0.730936	0	1	4	1683.85	0.0430778	1045	1045	36.645	MS2	20/84
	RANnTVWGSNLqIqNLTVYnR	1	1	CID	N4(Deamidated) Q12(Deamidated) Q14(Deamidated) N20(Deamidated)	4.75424	0.708993	0.762896	6	3	2465.19	-19.1898	2901	2901	56.8934	MS2	14/80
	RANnTVWGSNLQIqnLTVYnR	1	1	CID	N4(Deamidated) Q14(Deamidated) N15(Deamidated) N20(Deamidated)	4.75424	0.7053	0.764131	7	3	2465.19	-19.1898	2901	2901	56.8934	MS2	15/80
	RANnTVWGSNLqIQnLTVYnR	1	1	CID	N4(Deamidated) Q12(Deamidated) N15(Deamidated) N20(Deamidated)	4.75424	0.687028	0.770242	9	3	2465.19	-19.1898	2901	2901	56.8934	MS2	14/80
	LENATVHmEFKPDAK	11	3	CID	M8(Oxidation)	8.12827	0.683434	0	1	3	1745.85	1.61797	872	872	34.513	MS2	12/56
	LKKLENATVHmEFKPDAK	11	3	CID	M11(Oxidation)	5.25987	0.682596	0.727099	2	2	2115.13	3.62239	5924	5924	93.8475	MS2	4/34
	DEYFTmAVYnnTATLEGR	11	3	CID	M6(Oxidation) N10(Deamidated) N11(Deamidated)	4.19502	0.625664	0	1	2	2112.9	-5.54765	1555	1555	42.2606	MS2	6/34
	GVIGLEFDSEVLVnK	13	4	CID	N14(Deamidated)	3.69358	0.577472	0	1	2	1619.84	-14.2187	4081	4081	69.5198	MS2	7/28
	qEQERKDKqEEK	12	3	CID	Q1(Deamidated) Q9(Deamidated)	3.45264	0.543847	0	1	3	1576.75	6.56673	3337	3337	61.5269	MS2	9/44
	QEqERKDKqEEK	12	3	CID	Q3(Deamidated) Q9(Deamidated)	3.45264	0.543184	0.00121961	2	3	1576.75	6.56673	3337	3337	61.5269	MS2	9/44
	VDLSSELDKLK	13	4	CID		20.1211	0.535609	0	1	2	1246.69	-0.447139	2866	2866	56.5254	MS2	6/20
	RANNTVWGSnLqIQnLTVYnR	1	1	CID	N10(Deamidated) Q12(Deamidated) N15(Deamidated) N20(Deamidated)	2.80018	0.521906	0	1	2	2465.2	-3.18512	4583	4583	75.1345	MS2	6/40
	SEDnGKTWGDKVVISnLRDnPEAK	1	1	CID	N4(Deamidated) N16(Deamidated) N20(Deamidated)	10.2572	0.519161	0	1	2	2675.27	-11.027	4991	4991	79.9744	MS2	5/46
gi225856358	7.29	10	1880	7.17434	zinc metalloprotease ZmpB [Streptococcus pneumoniae P1031]
	Sequence	# Proteins	# Protein Groups	Activation Type	Modifications	Probability	XCorr	Δ Score	Rank	Charge	MH+ [Da]	ΔM [ppm]	First Scan	Last Scan	RT [min]	MSOrder	Ions Matched	Annotation
	VEEGKEDSAEPAPVEEVGGEVESKPEEK	10	9	CID		114.407	4.07071	0	1	3	2983.39	-2.67184	1628	1628	43.036	MS2	30/108
	VPEQPVQPTQAEQPSTPK	3	3	CID		85.2063	3.10363	0	1	2	1961	0.685244	905	905	34.9426	MS2	17/34
	EDSAEPAPVEEVGGEVESKPEEK	10	9	CID		12.9099	0.893118	0.0803124	2	3	2441.12	-2.93654	1727	1727	44.0931	MS2	13/88
	SLFAKALEEDMVTNK	1	1	CID		4.11289	0.774509	0.238701	2	2	1695.85	-16.5406	3195	3195	60.0563	MS2	6/28
	SQANKEGKQFGDQYIIQKISDGR	1	1	CID		2.06062	0.706462	0.680377	2	2	2610.34	10.2886	5023	5023	80.4206	MS2	7/44
	ATEGnVYIAERASEVDEIK	1	1	CID	N5(Deamidated)	16.577	0.697114	0	1	2	2095.04	16.869	4999	4999	80.0706	MS2	8/36
	nNAFRLWGYYGYDK	1	1	CID	N1(Deamidated)	4.67853	0.631551	0	2	2	1767.82	11.4349	4164	4164	70.4508	MS2	5/26
	NnAFRLWGYYGYDK	1	1	CID	N2(Deamidated)	4.67853	0.631551	0	1	2	1767.82	11.4349	4164	4164	70.4508	MS2	5/26
	EVVKEDDqLK	1	1	CID	Q8(Deamidated)	13.9712	0.554729	0	1	2	1203.61	-4.38267	2262	2262	49.926	MS2	5/18
	NNKEDYAPLR	1	1	CID		13.0046	0.507945	0	1	2	1219.62	9.27103	1280	1280	39.2455	MS2	5/18
gi225857153	19.79	7	652	7.07583	oligopeptide binding lipoprotein [Streptococcus pneumoniae P1031]
	Sequence	# Proteins	# Protein Groups	Activation Type	Modifications	Probability	XCorr	Δ Score	Rank	Charge	MH+ [Da]	ΔM [ppm]	First Scan	Last Scan	RT [min]	MSOrder	Ions Matched	Annotation
	SEALYLVQDSVAGLDDYITGK	7	3	CID		111.002	2.90356	0	1	2	2257.13	2.99114	5293	5293	83.9825	MS2	15/40
	EWQGINFADGQDPYYNPEK	7	3	CID		79.3858	2.5304	0	1	2	2271	0.333877	3340	3340	61.5598	MS2	15/36
	SEALYLVQDSVAGLDDYITGK	7	3	CID		24.0013	1.64186	0	1	2	2257.12	0.061455	5592	5592	88.5305	MS2	12/40
	EKEESNKKAQEELAK	7	3	CID		6.59237	1.27835	0	1	3	1760.92	17.2016	1726	1726	44.0871	MS2	15/56
	YKNNIIYSmQnSTSYFFnFnLDR	5	2	CID	M9(Oxidation) N11(Deamidated) N18(Deamidated) N20(Deamidated)	3.52879	0.930677	0.200304	2	3	2898.32	22.8726	2671	2671	54.3734	MS2	12/88
	WFTSEGEEYAPVTAQDFVTGLQYAADKK	7	3	CID		25.6547	0.777121	0	1	3	3151.49	-0.624511	4850	4850	78.2033	MS2	20/108
	EVGLDVYTqmLEEANKEqDPAKR	1	1	CID	Q9(Deamidated) M10(Oxidation) Q18(Deamidated)	2.26312	0.589245	0.165639	2	2	2681.28	16.6813	5142	5142	81.7847	MS2	6/44
gi225861359	17.76	7	653	7.07583	oligopeptide-binding protein AliB [Streptococcus pneumoniae Taiwan19F-14]
	Sequence	# Proteins	# Protein Groups	Activation Type	Modifications	Probability	XCorr	Δ Score	Rank	Charge	MH+ [Da]	ΔM [ppm]	First Scan	Last Scan	RT [min]	MSOrder	Ions Matched	Annotation
	SEALYLVQDSVAGLDDYITGK	7	3	CID		111.002	2.90356	0	1	2	2257.13	2.99114	5293	5293	83.9825	MS2	15/40
	EWQGINFADGQDPYYNPEK	7	3	CID		79.3858	2.5304	0	1	2	2271	0.333877	3340	3340	61.5598	MS2	15/36
	SEALYLVQDSVAGLDDYITGK	7	3	CID		24.0013	1.64186	0	1	2	2257.12	0.061455	5592	5592	88.5305	MS2	12/40
	EKEESNKKAQEELAK	7	3	CID		6.59237	1.27835	0	1	3	1760.92	17.2016	1726	1726	44.0871	MS2	15/56
	WFTSEGEEYAPVTAQDFVTGLQYAADKK	7	3	CID		25.6547	0.777121	0	1	3	3151.49	-0.624511	4850	4850	78.2033	MS2	20/108
	QAINFAYDRTSYGAQTQGEDGATK	1	1	CID		9.15935	0.636783	0.698284	6	3	2592.2	-0.478437	6200	6200	98.4903	MS2	10/92
	DFGEVVASK	6	2	CID		8.15359	0.495829	0	1	2	951.478	-0.654639	941	941	35.3888	MS2	5/16
gi307128353	26.42	3	299	6.92358	UTP-glucose-1-phosphate uridylyltransferase [Streptococcus pneumoniae 670-6B]
	Sequence	# Proteins	# Protein Groups	Activation Type	Modifications	Probability	XCorr	Δ Score	Rank	Charge	MH+ [Da]	ΔM [ppm]	First Scan	Last Scan	RT [min]	MSOrder	Ions Matched	Annotation
	DGLYSVETFVEKPAPEDAPSDLAIIGR	5	1	CID		111.929	3.96803	0	1	3	2889.45	0.63543	4354	4354	72.5276	MS2	37/104
	AFVGNEPFVVmLGDDLmDITDEK	6	1	CID	M11(Oxidation) M17(Oxidation)	72.8198	2.95555	0	1	2	2587.19	-1.22847	5368	5368	85.1714	MS2	18/44
	THASTIAVmPVPHDEVSAYGVIAPQGEGK	5	1	CID	M9(Oxidation)	8.13472	1.67035	0	1	4	2977.47	-0.225555	2437	2437	51.8955	MS2	30/168
gi307126829	13.48	2	141	6.69454	50S ribosomal protein L11 [Streptococcus pneumoniae 670-6B]
	Sequence	# Proteins	# Protein Groups	Activation Type	Modifications	Probability	XCorr	Δ Score	Rank	Charge	MH+ [Da]	ΔM [ppm]	First Scan	Last Scan	RT [min]	MSOrder	Ions Matched	Annotation
	TADQAGmIIPVVISVYEDK	3	1	CID	M7(Oxidation)	95.7695	3.5173	0	1	2	2065.05	0.0073925	4452	4452	73.6461	MS2	20/36
	TADQAGmIIPVVISVYEDK	3	1	CID	M7(Oxidation)	21.2488	3.17725	0	1	3	2065.05	1.6419	4498	4498	74.1653	MS2	28/72
gi307126728	18.39	2	174	6.57936	co-chaperone GrpE [Streptococcus pneumoniae 670-6B]
	Sequence	# Proteins	# Protein Groups	Activation Type	Modifications	Probability	XCorr	Δ Score	Rank	Charge	MH+ [Da]	ΔM [ppm]	First Scan	Last Scan	RT [min]	MSOrder	Ions Matched	Annotation
	NEEVEEVQEEEVVETAEETTPEKSELDLANER	4	1	CID		89.8338	4.60419	0	1	3	3703.68	0.0572859	3476	3476	63.045	MS2	39/124
	NEEVEEVQEEEVVETAEETTPEK	4	1	CID		67.4212	1.97517	0	1	2	2676.19	-0.518858	2793	2793	55.7269	MS2	15/44
gi225855096	11.22	7	419	6.49793	cell division protein FtsZ [Streptococcus pneumoniae JJA]
	Sequence	# Proteins	# Protein Groups	Activation Type	Modifications	Probability	XCorr	Δ Score	Rank	Charge	MH+ [Da]	ΔM [ppm]	First Scan	Last Scan	RT [min]	MSOrder	Ions Matched	Annotation
	FEAPISQDEDELDTPPFFK	4	1	CID		49.8441	2.36746	0	1	2	2225.03	-0.457529	4390	4390	72.9069	MS2	14/36
	FEAPISQDEDELDTPPFFK	4	1	CID		41.756	2.24123	0	1	2	2225.02	-6.56104	4117	4117	69.8974	MS2	9/36
	FEAPISQDEDELDTPPFFK	4	1	CID		29.6275	1.88924	0	1	2	2225.03	1.4956	5920	5920	93.7997	MS2	15/36
	FEAPISQDEDELDTPPFFK	4	1	CID		53.1774	1.39307	0	1	2	2225.03	-0.945811	4654	4654	75.9321	MS2	10/36
	FEAPISQDEDELDTPPFFK	4	1	CID		20.7363	0.670008	0	1	2	2225.03	2.22802	6226	6226	99.0885	MS2	8/36
	GNALmGIGIGSGEER	4	1	CID	M5(Oxidation)	4.31825	0.662962	0	1	2	1476.71	0.501221	2019	2019	47.2758	MS2	10/28
	VVAPQASSATnYR	1	1	CID	N11(Deamidated)	4.80251	0.406912	0.126118	2	2	1364.67	-13.3554	4450	4450	73.6186	MS2	3/24
gi307126677	14.47	6	774	6.43714	formate acetyltransferase [Streptococcus pneumoniae 670-6B]
	Sequence	# Proteins	# Protein Groups	Activation Type	Modifications	Probability	XCorr	Δ Score	Rank	Charge	MH+ [Da]	ΔM [ppm]	First Scan	Last Scan	RT [min]	MSOrder	Ions Matched	Annotation
	GTFTESEIQEFVDDFVmK	6	1	CID	M17(Oxidation)	81.8159	3.63345	0	1	2	2137.97	2.08747	5340	5340	84.783	MS2	20/34
	FVQANYTPYDGDESFLAGPTER	6	1	CID		103.692	2.80369	0	1	2	2477.13	-0.359561	3198	3198	60.0898	MS2	21/42
	ENEVIFGIQNDELFK	6	1	CID		24.7596	1.48901	0	1	2	1794.89	-3.19839	4267	4267	71.5533	MS2	8/28
	AYDQLYSGDPTFITTSmAGmGNDGR	6	1	CID	M17(Oxidation) M20(Oxidation)	72.628	1.35666	0	1	2	2700.16	1.20044	2832	2832	56.1607	MS2	15/48
	YVTTVnDGIFRAYTSNIR	6	1	CID	N6(Deamidated)	4.18181	0.628267	0	1	2	2091.04	-11.4972	2364	2364	51.003	MS2	5/34
	GVYLNEDGSVNLSK	6	1	CID		7.99406	0.600244	0.134015	3	2	1494.74	-1.89655	2086	2086	48.051	MS2	6/26
gi307126614	42.15	14	427	6.03547	trigger factor [Streptococcus pneumoniae 670-6B]
	Sequence	# Proteins	# Protein Groups	Activation Type	Modifications	Probability	XCorr	Δ Score	Rank	Charge	MH+ [Da]	ΔM [ppm]	First Scan	Last Scan	RT [min]	MSOrder	Ions Matched	Annotation
	EVEQLAADYNmEVAQVQNLLSADmLK	8	1	CID	M11(Oxidation) M24(Oxidation)	16.585	3.03713	0	1	3	2954.41	1.72432	5194	5194	82.3148	MS2	21/100
	EEAYKDAVEGAAIDTAVENAEIVELPEEmIHEEVHR	8	1	CID	M29(Oxidation)	46.358	2.99834	0	1	4	4051.91	2.87101	4414	4414	73.1818	MS2	32/210
	EEAYKDAVEGAAIDTAVENAEIVELPEEmIHEEVHR	8	1	CID	M29(Oxidation)	8.44012	1.66715	0	1	5	4051.91	1.69789	4396	4396	72.9598	MS2	30/280
	FGEEALYQDAmNALLPNAYEAAVK	3	1	CID	M11(Oxidation)	3.24021	1.48995	0	1	2	2644.26	0.235205	4639	4639	75.7789	MS2	10/46
	NLEVSVDVEK	9	1	CID		7.23978	1.42389	0	1	2	1131.59	0.762119	1811	1811	44.9935	MS2	8/18
	DAVEGAAIDTAVENAEIVELPEEmIHEEVHR	9	1	CID	M24(Oxidation)	3.37548	1.31533	0	1	3	3431.62	-5.62908	4255	4255	71.4322	MS2	18/120
	EVEQLAADYNmEVAQVQNLLSADmLK	8	1	CID	M11(Oxidation) M24(Oxidation)	7.57857	1.00966	0.00939081	2	3	2954.41	-3.76885	4332	4332	72.2642	MS2	14/100
	AEGFDASEEEIQK	9	1	CID		7.39738	0.981047	0	1	2	1452.65	-0.486201	1435	1435	40.9399	MS2	5/24
	QGINPDmYFQITGTTQEDLHNQYQAEAESR	9	1	CID	M7(Oxidation)	31.6567	0.885586	0	1	3	3500.56	-2.58662	3547	3547	63.7309	MS2	14/116
	GQDWVITAEVVTKPEVK	6	1	CID		24.4411	0.722295	0	1	3	1899.02	0.560001	3180	3180	59.9069	MS2	15/64
	GQDWVITAEVVTKPEVK	6	1	CID		19.2881	0.71925	0	1	3	1899.02	-6.76422	5717	5717	90.4758	MS2	18/64
	EVEQLAADYNmEVAQVQNLLSADmLK	8	1	CID	M11(Oxidation) M24(Oxidation)	2.29603	0.659027	0	1	2	2954.41	-5.03714	4290	4290	71.7893	MS2	8/50
	EVPALDDELAKDIDEEVETLADLK	9	1	CID		33.6664	0.631043	0	1	2	2670.33	3.15302	5460	5460	86.4262	MS2	11/46
	EVPALDDELAK	9	1	CID		14.1836	0.434796	0	1	2	1199.62	0.288955	1996	1996	47.0685	MS2	6/20
gi298501608	10.53	3	418	5.94263	maltose/maltodextrin ABC superfamily transporter ATP-binding protein [Streptococcus pneumoniae TCH8431/19A]
	Sequence	# Proteins	# Protein Groups	Activation Type	Modifications	Probability	XCorr	Δ Score	Rank	Charge	MH+ [Da]	ΔM [ppm]	First Scan	Last Scan	RT [min]	MSOrder	Ions Matched	Annotation
	GmQDTEGAGNLIQTQFQEGK	8	1	CID	M2(Oxidation)	82.242	2.50499	0	1	2	2167.99	-0.0670606	2320	2320	50.549	MS2	14/38
	NDELTTAVIK	9	1	CID		15.7464	1.74379	0	1	2	1103.59	-0.16749	1640	1640	43.1701	MS2	10/18
	VGSLGSDGQLSEVK	8	1	CID		14.0538	1.69384	0	1	2	1375.71	-0.807295	1369	1369	40.2423	MS2	11/26
gi221232394	33.04	12	230	5.87145	2,3-bisphosphoglycerate-dependent phosphoglycerate mutase [Streptococcus pneumoniae ATCC 700669]
	Sequence	# Proteins	# Protein Groups	Activation Type	Modifications	Probability	XCorr	Δ Score	Rank	Charge	MH+ [Da]	ΔM [ppm]	First Scan	Last Scan	RT [min]	MSOrder	Ions Matched	Annotation
	AEAAEQFGDEQVHIWR	2	2	CID		115.966	3.53382	0	1	2	1885.88	0.62915	2689	2689	54.5671	MS2	18/30
	TTNLALEASDQLWVPVEK	2	2	CID		63.1552	2.33763	0	1	2	2014.05	1.22134	4026	4026	68.8672	MS2	15/34
	SYDVLPPNmDRDDEHSAHTDR	2	2	CID	M9(Oxidation)	9.85946	1.92588	0	1	4	2486.07	5.67241	930	930	35.2656	MS2	23/120
	RSYDVLPPNmDRDDEHSAHTDR	2	2	CID	M10(Oxidation)	31.9788	1.47392	0	1	4	2642.16	-0.476883	839	839	34.1132	MS2	25/126
	AEAAEQFGDEQVHIWR	2	2	CID		5.8673	1.29875	0	1	3	1885.88	1.83641	2906	2906	56.9529	MS2	14/60
	SYDVLPPNmDRDDEHSAHTDR	2	2	CID	M9(Oxidation)	40.5038	1.19785	0	1	4	2486.06	-0.919383	1195	1195	38.3019	MS2	21/120
	TTNLALEASDQLWVPVEK	2	2	CID		4.06465	0.889162	0	1	2	2014.05	1.83169	4334	4334	72.2763	MS2	9/34
	SYDVLPPNmDRDDEHSAHTDR	2	2	CID	M9(Oxidation)	36.4539	0.694729	0	1	3	2486.06	-2.0656	948	948	35.4682	MS2	14/80
	LIKEAGIKFDQAYTSVLK	1	1	CID		5.05408	0.654591	0.05694	2	2	2024.13	-16.2289	4988	4988	79.9416	MS2	4/34
	AEAAEQFGDEQVHIWR	2	2	CID		3.38705	0.618876	0.0208607	2	3	1885.88	1.10399	6188	6188	98.2553	MS2	11/60
	nKAEAAEQFGDEqVHIWR	2	2	CID	N1(Deamidated) Q13(Deamidated)	2.81537	0.600892	0	1	2	2130	15.6688	1631	1631	43.0698	MS2	4/34
	SYDVLPPNmDRDDEHSAHTDR	2	2	CID	M9(Oxidation)	6.81681	0.565385	0	1	5	2486.06	0.776155	937	937	35.3447	MS2	23/160
gi225859960	18.35	12	692	5.68053	choline binding protein A [Streptococcus pneumoniae 70585]
	Sequence	# Proteins	# Protein Groups	Activation Type	Modifications	Probability	XCorr	Δ Score	Rank	Charge	MH+ [Da]	ΔM [ppm]	First Scan	Last Scan	RT [min]	MSOrder	Ions Matched	Annotation
	EKPAEQPQPAPAPQPEKPAPKPEKPAEQPK	1	1	CID		51.2555	3.42966	0	1	4	3239.7	-3.05766	542	542	29.4852	MS2	32/174
	EKPAEQPQPAPAPQPEKPAPKPEKPAEQPK	1	1	CID		14.0493	2.25086	0	1	3	3239.71	4.95139	555	555	29.6863	MS2	21/116
	EKPAEQPQPAPAPQPEKPAPKPEKPAEQPK	1	1	CID		12.9676	1.82105	0	1	5	3239.7	-1.6673	793	793	33.5065	MS2	43/232
	EKPAEQPQPAPAPQPEKPAPKPEKPAEQPK	1	1	CID		29.1878	1.12912	0	1	6	3239.71	1.06583	718	718	32.438	MS2	54/290
	TDDQQAEEDYAR	5	4	CID		25.123	1.04664	0	1	2	1440.59	1.01521	503	503	28.138	MS2	7/22
	EKPAEQPQPAPAPQPEKPAPKPEKPAEQPK	1	1	CID		30.6088	0.998977	0	1	5	3239.71	3.21551	612	612	30.4735	MS2	51/232
	EAELELVKEEAK	1	1	CID		14.7709	0.915193	0	1	3	1387.73	0.294893	1670	1670	43.5448	MS2	11/44
	KHTQNVGLLTK	1	1	CID		6.1742	0.589968	0	1	2	1238.73	10.1458	3614	3614	64.4337	MS2	7/20
	SEEEYnRLTqqqPPK	3	3	CID	N6(Deamidated) Q10(Deamidated) Q11(Deamidated) Q12(Deamidated)	2.86573	0.572799	0.634908	4	3	1850.84	11.1998	1602	1602	42.7415	MS2	8/56
	KADAKLKEANVATSDqGnPK	1	1	CID	Q16(Deamidated) N18(Deamidated)	7.78086	0.565768	0.0754652	2	2	2087.05	-9.07547	1346	1346	39.9759	MS2	4/38
	DGDTWYYLEASGAmK	8	7	CID	M14(Oxidation)	3.59506	0.464857	0	1	2	1722.73	0.701103	2835	2835	56.1928	MS2	5/28
	TDDQQAEEDYAR	5	4	CID		15.3308	0.406585	0	1	2	1440.59	-0.205498	437	437	25.132	MS2	4/22
gi307128479	27.3	11	392	5.60771	CHAP domain-containing protein [Streptococcus pneumoniae 670-6B]
	Sequence	# Proteins	# Protein Groups	Activation Type	Modifications	Probability	XCorr	Δ Score	Rank	Charge	MH+ [Da]	ΔM [ppm]	First Scan	Last Scan	RT [min]	MSOrder	Ions Matched	Annotation
	ASQQQSVLASANTNLTAQVQAVSESAAAPVR	3	1	CID		79.1011	3.4876	0	1	3	3097.59	1.58108	3904	3904	67.5264	MS2	33/120
	ASQQQSVLASANTNLTAQVQAVSESAAAPVR	3	1	CID		21.5132	1.86342	0	1	3	3097.58	-8.30662	4178	4178	70.6329	MS2	22/120
	NQSLEKQARSAQTnGAVTSYINTIVNSK	3	1	CID	N14(Deamidated)	6.32595	1.78129	0.398194	3	3	3023.54	2.13972	5114	5114	81.4677	MS2	21/108
	NQSLEKQARSAqTNGAVTSYINTIVNSK	3	1	CID	Q12(Deamidated)	12.1252	1.77008	0.401981	4	3	3023.54	2.13972	5114	5114	81.4677	MS2	21/108
	NQSLEKqARSAQTNGAVTSYINTIVNSK	3	1	CID	Q7(Deamidated)	12.1252	1.71562	0.42038	5	3	3023.54	2.13972	5114	5114	81.4677	MS2	21/108
	NqSLEKQARSAQTNGAVTSYINTIVNSK	3	1	CID	Q2(Deamidated)	12.1252	1.6888	0.429442	6	3	3023.54	2.13972	5114	5114	81.4677	MS2	22/108
	nQSLEKQARSAQTNGAVTSYINTIVNSK	3	1	CID	N1(Deamidated)	12.1252	1.68202	0.431732	7	3	3023.54	2.13972	5114	5114	81.4677	MS2	22/108
	MLEqQKADKK	3	1	CID	Q4(Deamidated)	5.792	0.749249	0.02909	2	2	1219.63	-3.16169	3720	3720	65.5686	MS2	6/18
	MLEQqKADKK	3	1	CID	Q5(Deamidated)	5.792	0.624711	0.190472	3	2	1219.63	-3.16169	3720	3720	65.5686	MS2	5/18
	VAAMSEIVSANnK	3	1	CID	N12(Deamidated)	2.43138	0.537828	0.448689	3	2	1334.66	-3.01208	4369	4369	72.6658	MS2	8/24
	QVDQIQEQVSAIQAEQSNLQAENDR	3	1	CID		7.22936	0.433583	0	1	2	2841.36	3.25411	3063	3063	58.6211	MS2	8/48
gi307126900	15.61	3	378	5.51642	L-lactate oxidase [Streptococcus pneumoniae 670-6B]
	Sequence	# Proteins	# Protein Groups	Activation Type	Modifications	Probability	XCorr	Δ Score	Rank	Charge	MH+ [Da]	ΔM [ppm]	First Scan	Last Scan	RT [min]	MSOrder	Ions Matched	Annotation
	QIDGGPAAFDSLQEVAEAVDR	4	1	CID		145.396	2.94786	0	1	2	2188.05	-1.20659	4638	4638	75.7729	MS2	18/40
	TSNAEGHVDFINTYDLEPmAQQVIPK	8	1	CID	M19(Oxidation)	28.5028	2.56856	0	1	3	2933.4	-0.397753	3491	3491	63.1828	MS2	21/100
	SmDFVYKSAKqR	5	1	CID	M2(Oxidation) Q11(Deamidated)	25.3347	0.66241	0.000832804	2	2	1476.71	-3.48478	2019	2019	47.2758	MS2	7/22
gi307126632	18.92	2	74	5.38997	hypothetical protein SP670_0492 [Streptococcus pneumoniae 670-6B]
	Sequence	# Proteins	# Protein Groups	Activation Type	Modifications	Probability	XCorr	Δ Score	Rank	Charge	MH+ [Da]	ΔM [ppm]	First Scan	Last Scan	RT [min]	MSOrder	Ions Matched	Annotation
	TVGDLVAYVEEQAK	1	1	CID		59.6032	2.73328	0	1	2	1521.78	0.251455	4344	4344	72.4023	MS2	16/26
	TVGDLVAYVEEQAK	1	1	CID		19.3586	2.65669	0	1	3	1521.78	0.0549031	4285	4285	71.7438	MS2	22/52
gi307127069	20.09	5	428	5.35595	homoserine dehydrogenase [Streptococcus pneumoniae 670-6B]
	Sequence	# Proteins	# Protein Groups	Activation Type	Modifications	Probability	XCorr	Δ Score	Rank	Charge	MH+ [Da]	ΔM [ppm]	First Scan	Last Scan	RT [min]	MSOrder	Ions Matched	Annotation
	LGFAESDPTNDVDGIDAAYK	7	1	CID		67.053	2.9116	0	1	2	2097.95	-6.33972	2873	2873	56.5958	MS2	18/38
	NITPEDVAVAQELGYVVK	6	1	CID		74.2775	2.44435	0	1	2	1945.03	2.06145	3969	3969	68.2157	MS2	12/34
	VLGVVNGTSNFmVTKMVEEGWSYDDALAEAQR	7	1	CID	M12(Oxidation)	4.44413	0.791448	0.551223	4	4	3532.69	16.8755	3233	3233	60.4544	MS2	20/186
	GIRnITPEDVAVAqELGYVVK	6	1	CID	N4(Deamidated) Q14(Deamidated)	2.44991	0.544258	0	1	2	2273.21	11.2073	5537	5537	87.6809	MS2	6/40
	AnYYFSILAPDSK	2	1	CID	N2(Deamidated)	3.25952	0.435073	0	1	2	1489.72	3.06932	4520	4520	74.4122	MS2	5/24
gi169833024	24.26	14	305	5.2468	zinc-binding lipoprotein AdcA [Streptococcus pneumoniae Hungary19A-6]
	Sequence	# Proteins	# Protein Groups	Activation Type	Modifications	Probability	XCorr	Δ Score	Rank	Charge	MH+ [Da]	ΔM [ppm]	First Scan	Last Scan	RT [min]	MSOrder	Ions Matched	Annotation
	TLNPLEADPQnDKTYLENLEEnMSILAEELK	1	1	CID	N11(Deamidated) N22(Deamidated)	37.4356	3.05953	0.156899	2	3	3576.73	14.0058	4714	4714	76.601	MS2	24/120
	TLNPLEADPQNDKTYLEnLEEnMSILAEELK	1	1	CID	N18(Deamidated) N22(Deamidated)	21.2498	3.02585	0.16618	3	3	3576.73	14.0058	4714	4714	76.601	MS2	26/120
	TLNPLEADPQnDKTYLEnLEENMSILAEELK	1	1	CID	N11(Deamidated) N18(Deamidated)	29.0509	2.99397	0.174965	4	3	3576.73	14.0058	4714	4714	76.601	MS2	23/120
	TLNPLEADPqNDKTYLENLEEnMSILAEELK	1	1	CID	Q10(Deamidated) N22(Deamidated)	37.4356	2.96811	0.182091	5	3	3576.73	14.0058	4714	4714	76.601	MS2	24/120
	TLNPLEADPqNDKTYLEnLEENMSILAEELK	1	1	CID	Q10(Deamidated) N18(Deamidated)	29.0509	2.91859	0.195738	6	3	3576.73	14.0058	4714	4714	76.601	MS2	23/120
	TLNPLEADPqnDKTYLENLEENMSILAEELK	1	1	CID	Q10(Deamidated) N11(Deamidated)	14.0969	2.76448	0.238204	7	3	3576.73	14.0058	4714	4714	76.601	MS2	23/120
	AGEEAQIIADK	6	1	CID		31.9095	2.18727	0	1	2	1144.58	0.008955	945	945	35.4306	MS2	13/20
	TLnPLEADPQNDKTYLENLEEnMSILAEELK	1	1	CID	N3(Deamidated) N22(Deamidated)	2.90466	2.16429	0.403596	8	3	3576.73	14.0058	4714	4714	76.601	MS2	23/120
	TLnPLEADPQNDKTYLEnLEENMSILAEELK	1	1	CID	N3(Deamidated) N18(Deamidated)	2.90466	2.05688	0.433194	9	3	3576.73	14.0058	4714	4714	76.601	MS2	22/120
	STGVGLKTLNPLEADPqNDK	4	1	CID	Q17(Deamidated)	9.10546	1.21262	0.507095	2	4	2098.07	7.51595	2077	2077	47.969	MS2	22/114
	STGVGLKTLNPLEADPQnDK	4	1	CID	N18(Deamidated)	9.10546	1.19688	0.513495	3	4	2098.07	7.51595	2077	2077	47.969	MS2	22/114
	VLEASEGMTLER	6	1	CID		9.01918	0.975543	0	1	2	1334.66	-3.01608	4369	4369	72.6658	MS2	7/22
	VKTIFTESnASSK	6	1	CID	N9(Deamidated)	8.7735	0.890639	0	1	3	1412.72	-7.16866	1044	1044	36.6392	MS2	10/48
	TLNPLEADPQNDK	4	1	CID		2.70906	0.637502	0	1	2	1454.71	-0.0254981	1713	1713	43.9646	MS2	6/24
gi307128123	6.37	2	471	5.23828	pneumolysin [Streptococcus pneumoniae 670-6B]
	Sequence	# Proteins	# Protein Groups	Activation Type	Modifications	Probability	XCorr	Δ Score	Rank	Charge	MH+ [Da]	ΔM [ppm]	First Scan	Last Scan	RT [min]	MSOrder	Ions Matched	Annotation
	TGNSLDIDFNSVHSGEK	2	1	CID		87.1823	3.21153	0	1	2	1819.84	-4.17097	2170	2170	49.0026	MS2	13/32
	VDmVEDLIQEGSR	2	1	CID	M3(Oxidation)	26.4823	2.02675	0	1	2	1506.71	0.0825878	2424	2424	51.725	MS2	15/24
gi307067830	6.79	2	574	5.20481	PTS system phosphoenolpyruvate-protein kinase [Streptococcus pneumoniae AP200]
	Sequence	# Proteins	# Protein Groups	Activation Type	Modifications	Probability	XCorr	Δ Score	Rank	Charge	MH+ [Da]	ΔM [ppm]	First Scan	Last Scan	RT [min]	MSOrder	Ions Matched	Annotation
	DVEGVNNNGAEAVGLYR	6	1	CID		73.9545	2.81659	0	1	2	1776.85	1.75157	1898	1898	46.0064	MS2	16/32
	TEFLYmDSQDFPTEDEQYEAYK	6	1	CID	M6(Oxidation)	16.1925	1.67593	0	1	3	2765.14	-4.85957	3186	3186	59.9725	MS2	16/84
gi307126916	10.83	7	591	5.18378	pyruvate oxidase [Streptococcus pneumoniae 670-6B]
	Sequence	# Proteins	# Protein Groups	Activation Type	Modifications	Probability	XCorr	Δ Score	Rank	Charge	MH+ [Da]	ΔM [ppm]	First Scan	Last Scan	RT [min]	MSOrder	Ions Matched	Annotation
	HADQDAIYSIDVGNTTQTSTR	4	1	CID		82.3893	2.92695	0	1	2	2293.07	0.446377	1983	1983	46.9472	MS2	17/40
	HEETGALAAVmQAK	4	1	CID	M11(Oxidation)	71.0604	2.25683	0	1	2	1471.72	-2.11663	1079	1079	37.0657	MS2	16/26
	HADQDAIYSIDVGNTTQTSTR	4	1	CID		28.6847	1.80818	0	1	3	2293.06	-7.01336	6213	6213	98.6959	MS2	18/80
	IEDIDAVVAEAVK	4	1	CID		13.1538	1.32115	0	1	2	1371.74	1.29134	3989	3989	68.4283	MS2	11/24
	TEGELqLYQVYnAInK	4	1	CID	Q6(Deamidated) N12(Deamidated) N15(Deamidated)	4.89619	1.16178	0.101803	2	2	1885.9	-7.64592	1661	1661	43.4475	MS2	5/30
	TEGELQLYqVYnAInK	4	1	CID	Q9(Deamidated) N12(Deamidated) N15(Deamidated)	4.89619	1.0689	0.173607	4	2	1885.9	-7.64592	1661	1661	43.4475	MS2	6/30
	IEDIDAVVAEAVK	4	1	CID		8.79	1.02918	0	1	2	1371.74	-1.028	3700	3700	65.3606	MS2	8/24
gi307128359	19.38	7	418	5.12686	tyrosyl-tRNA synthetase [Streptococcus pneumoniae 670-6B]
	Sequence	# Proteins	# Protein Groups	Activation Type	Modifications	Probability	XCorr	Δ Score	Rank	Charge	MH+ [Da]	ΔM [ppm]	First Scan	Last Scan	RT [min]	MSOrder	Ions Matched	Annotation
	GVPNYQVQADEHNNIVELLVSSGIVNSK	2	1	CID		34.6026	2.95991	0	1	3	3023.54	-1.89428	5114	5114	81.4677	MS2	25/108
	IQDLDYVLSDADKLENELTVIR	4	1	CID		108.28	2.16695	0	1	2	2562.33	3.69239	5272	5272	83.6358	MS2	23/42
	qAREDVqNGAIYVNGDR	4	1	CID	Q1(Deamidated) Q7(Deamidated)	2.27563	0.778074	0.070128	4	2	1906.88	-10.3336	3922	3922	67.7269	MS2	6/32
	qAREDVQNGAIYVnGDR	4	1	CID	Q1(Deamidated) N14(Deamidated)	2.27563	0.771179	0.0783687	5	2	1906.88	-10.3336	3922	3922	67.7269	MS2	7/32
	qAREDVQnGAIYVNGDR	4	1	CID	Q1(Deamidated) N8(Deamidated)	2.27563	0.739782	0.11589	6	2	1906.88	-10.3336	3922	3922	67.7269	MS2	6/32
	QAREDVQNGAIYVnGDR	4	1	CID	N14(Deamidated)	3.74437	0.635492	0.141801	2	2	1905.9	-4.58908	1880	1880	45.798	MS2	5/32
	YFTVnYmmSKESVK	4	1	CID	N5(Deamidated) M7(Oxidation) M8(Oxidation)	2.05089	0.42179	0.811831	5	2	1759.8	9.88604	6295	6295	101.178	MS2	4/26
gi307127433	58.33	2	60	5.00369	hypothetical protein SP670_1303 [Streptococcus pneumoniae 670-6B]
	Sequence	# Proteins	# Protein Groups	Activation Type	Modifications	Probability	XCorr	Δ Score	Rank	Charge	MH+ [Da]	ΔM [ppm]	First Scan	Last Scan	RT [min]	MSOrder	Ions Matched	Annotation
	NTGAPQSAVHVIINDmPEGTYFPQGEmR	4	1	CID	M16(Oxidation) M27(Oxidation)	46.3698	3.33219	0	1	3	3091.42	-0.407636	2917	2917	57.0811	MS2	27/108
	IDLFEGR	4	1	CID		13.9809	1.6715	0	1	2	849.446	-0.143604	2187	2187	49.1477	MS2	9/12
gi225859717	7.85	11	1198	4.84252	DNA-directed RNA polymerase subunit beta [Streptococcus pneumoniae 70585]
	Sequence	# Proteins	# Protein Groups	Activation Type	Modifications	Probability	XCorr	Δ Score	Rank	Charge	MH+ [Da]	ΔM [ppm]	First Scan	Last Scan	RT [min]	MSOrder	Ions Matched	Annotation
	LLNQTIAEPLVDPETGEILVEAGTImTR	8	1	CID	M26(Oxidation)	57.3036	2.57919	0	1	3	3039.59	2.14406	4680	4680	76.2154	MS2	25/108
	HQGVNQEYPANIVDYmDVSPK	8	1	CID	M16(Oxidation)	19.3709	2.26333	0	1	2	2420.11	-13.0258	2419	2419	51.6486	MS2	10/40
	HqGVNqEYPAnIVDYMDVSPK	8	1	CID	Q2(Deamidated) Q6(Deamidated) N11(Deamidated)	8.1439	1.12259	0.249588	2	3	2407.09	13.1651	3866	3866	67.0884	MS2	11/80
	HQGVnqEYPAnIVDYMDVSPK	8	1	CID	N5(Deamidated) Q6(Deamidated) N11(Deamidated)	8.1439	1.09388	0.26878	3	3	2407.09	13.1651	3866	3866	67.0884	MS2	12/80
	HqGVnqEYPANIVDYMDVSPK	8	1	CID	Q2(Deamidated) N5(Deamidated) Q6(Deamidated)	2.85757	1.08434	0	1	4	2407.09	16.5086	4060	4060	69.2781	MS2	15/120
	HqGVnQEYPAnIVDYMDVSPK	8	1	CID	Q2(Deamidated) N5(Deamidated) N11(Deamidated)	8.1439	1.07929	0.278532	4	3	2407.09	13.1651	3866	3866	67.0884	MS2	11/80
	HqGVnqEYPANIVDYMDVSPK	8	1	CID	Q2(Deamidated) N5(Deamidated) Q6(Deamidated)	15.25	0.936594	0.373921	5	3	2407.09	13.1651	3866	3866	67.0884	MS2	12/80
	DLDEGmDEDVIHVDDLEK	8	1	CID	M6(Oxidation)	7.83719	0.655356	0	1	3	2102.91	0.714766	2478	2478	52.3462	MS2	10/68
	VLDEDDQEVELR	8	1	CID		2.69671	0.533826	0.240104	2	2	1459.69	-2.76921	1643	1643	43.2022	MS2	6/22
	RSnSGTAYnQRTLVK	8	1	CID	N3(Deamidated) N9(Deamidated)	2.40576	0.449804	0	1	2	1696.85	-16.325	5364	5364	85.1291	MS2	5/28
	RSNSGTAYnqRTLVK	8	1	CID	N9(Deamidated) Q10(Deamidated)	2.40576	0.418162	0.0703473	4	2	1696.85	-16.325	5364	5364	85.1291	MS2	5/28
gi194397693	9.11	12	1767	4.83895	cell wall surface anchor family protein [Streptococcus pneumoniae G54]
	Sequence	# Proteins	# Protein Groups	Activation Type	Modifications	Probability	XCorr	Δ Score	Rank	Charge	MH+ [Da]	ΔM [ppm]	First Scan	Last Scan	RT [min]	MSOrder	Ions Matched	Annotation
	GYNDFmmDNLQIEEITLTGK	11	3	CID	M6(Oxidation) M7(Oxidation)	60.873	2.77056	0	1	2	2364.07	-4.3619	3841	3841	66.8461	MS2	15/38
	WENGTPVTmTDNGSTYK	12	3	CID	M9(Oxidation)	26.8644	2.06838	0	1	2	1916.84	5.14813	1125	1125	37.5852	MS2	14/32
	QTNPEmSWSEGmHIYDQGFNSGTLK	12	3	CID	M6(Oxidation) M12(Oxidation)	54.1572	1.38661	0	1	3	2889.25	0.332462	3024	3024	58.1853	MS2	18/96
	TEEELLALEK	12	3	CID		13.6716	1.25107	0	1	2	1174.62	0.431768	2301	2301	50.3303	MS2	8/18
	DGWFWEYKTPGNSTWYKGnR	2	2	CID	N19(Deamidated)	9.45715	0.845175	0.235595	3	3	2493.13	6.07486	5739	5739	90.8472	MS2	9/76
	DIDFGKTIKAKK	11	2	CID		2.43345	0.814244	0	1	3	1363.8	9.4769	3635	3635	64.6229	MS2	11/44
	NYLPTVAMTNYTK	12	3	CID		2.02873	0.616491	0	1	2	1515.76	3.94325	2613	2613	53.7487	MS2	6/24
	NYLPTVAmTnYTK	12	3	CID	M8(Oxidation) N10(Deamidated)	9.68149	0.577964	0	1	3	1532.74	14.1956	1347	1347	39.982	MS2	8/48
	FDGATmSNNTHVSGDDHIDVTNPmK	12	3	CID	M6(Oxidation) M24(Oxidation)	3.20949	0.480102	0	1	4	2735.17	0.311945	1170	1170	38.0162	MS2	19/144
	VIqDGSAYLTPWnWDANGK	12	3	CID	Q3(Deamidated) N13(Deamidated)	5.5405	0.479866	0.267894	2	2	2136.99	0.721408	2334	2334	50.7045	MS2	5/36
	nYLPTVAmTNYTK	12	3	CID	N1(Deamidated) M8(Oxidation)	9.68149	0.433141	0.250576	2	3	1532.74	14.1956	1347	1347	39.982	MS2	8/48
	NYLPTVAMTNYTK	12	3	CID		10.7989	0.416554	0	1	2	1515.75	0.403213	3236	3236	60.4881	MS2	4/24
gi225859941	15.17	5	501	4.64925	zinc-binding lipoprotein AdcA [Streptococcus pneumoniae 70585]
	Sequence	# Proteins	# Protein Groups	Activation Type	Modifications	Probability	XCorr	Δ Score	Rank	Charge	MH+ [Da]	ΔM [ppm]	First Scan	Last Scan	RT [min]	MSOrder	Ions Matched	Annotation
	TDVLNPLESLTEEDTK	12	1	CID		96.4334	2.69366	0	1	2	1803.89	-0.365654	4036	4036	68.9917	MS2	15/30
	IQDADTFVYENENmETWVPK	12	1	CID	M14(Oxidation)	46.2578	1.95559	0	1	2	2445.09	-0.962529	3199	3199	60.0958	MS2	13/38
	GYHTDVTKInITDnTmEFVQGGqSKK	2	1	CID	N10(Deamidated) N14(Deamidated) M16(Oxidation) Q23(Deamidated)	4.94761	1.1869	0.291633	7	3	2930.38	4.89022	4748	4748	77.0195	MS2	13/100
	GYHTDVTKInITDnTmEFVqGGQSKK	2	1	CID	N10(Deamidated) N14(Deamidated) M16(Oxidation) Q20(Deamidated)	4.94761	1.13686	0.321499	9	3	2930.38	4.89022	4748	4748	77.0195	MS2	13/100
	QTTDQEGPAIEPEK	11	1	CID		4.9896	0.736882	0	1	2	1542.74	11.0241	1677	1677	43.6155	MS2	6/26
gi307128147	17.78	5	388	4.54642	protein RecA [Streptococcus pneumoniae 670-6B]
	Sequence	# Proteins	# Protein Groups	Activation Type	Modifications	Probability	XCorr	Δ Score	Rank	Charge	MH+ [Da]	ΔM [ppm]	First Scan	Last Scan	RT [min]	MSOrder	Ions Matched	Annotation
	FGLIDGEEVSEQDTENKKDEPK	2	1	CID		80.683	2.67602	0	1	4	2507.18	0.342414	2002	2002	47.1174	MS2	38/126
	FGLIDGEEVSEQDTENK	2	1	CID		35.1194	1.8704	0	1	2	1909.86	-2.19003	2336	2336	50.7168	MS2	9/32
	VGVMFGnPETTPGGRALK	2	1	CID	N7(Deamidated)	9.95922	0.825155	0	1	2	1831.94	4.00241	3567	3567	63.9375	MS2	7/34
	EAVVEIMYGEGISK	2	1	CID		2.57299	0.478977	0	1	2	1524.77	6.00235	3285	3285	60.9519	MS2	4/26
	MMSQAmRKLGASInK	2	1	CID	M6(Oxidation) N14(Deamidated)	12.2246	0.421695	0.804413	6	2	1682.82	-15.4625	1958	1958	46.6799	MS2	5/28
gi307126636	15.09	3	411	4.49372	3-oxoacyl-[acyl-carrier-protein] synthase 2 [Streptococcus pneumoniae 670-6B]
	Sequence	# Proteins	# Protein Groups	Activation Type	Modifications	Probability	XCorr	Δ Score	Rank	Charge	MH+ [Da]	ΔM [ppm]	First Scan	Last Scan	RT [min]	MSOrder	Ions Matched	Annotation
	GESGAIVAVLGK	3	1	CID		60.0252	2.45498	0	1	2	1100.63	0.323955	2417	2417	51.6373	MS2	14/22
	NGFVmGEGSGmLVLESLEHAEK	3	1	CID	M5(Oxidation) M11(Oxidation)	25.9461	2.03874	0	1	3	2366.1	0.33086	3884	3884	67.2439	MS2	21/84
	LALEEAEISPEQVAYVNAHGTSTPANEK	3	1	CID		18.6621	1.44482	0.0962662	6	3	2968.45	-1.37871	2899	2899	56.8663	MS2	18/108
gi307067697	11.84	3	380	4.47451	ADP-glucose pyrophosphorylase [Streptococcus pneumoniae AP200]
	Sequence	# Proteins	# Protein Groups	Activation Type	Modifications	Probability	XCorr	Δ Score	Rank	Charge	MH+ [Da]	ΔM [ppm]	First Scan	Last Scan	RT [min]	MSOrder	Ions Matched	Annotation
	EGAEVLDSVImSGAIIGQGAK	5	1	CID	M11(Oxidation)	49.6538	1.99866	0	1	2	2061.05	-0.594326	4109	4109	69.8005	MS2	17/40
	nKMLALILAGGQGTR	2	1	CID	N1(Deamidated)	9.20583	0.952309	0	1	2	1543.86	-5.2199	4547	4547	74.738	MS2	5/28
	NRQWKIYSR	6	1	CID		4.43474	0.921797	0	1	3	1250.69	9.91352	1743	1743	44.2631	MS2	9/32
gi15900430	18.39	3	174	4.41484	heat shock protein GrpE [Streptococcus pneumoniae TIGR4]
	Sequence	# Proteins	# Protein Groups	Activation Type	Modifications	Probability	XCorr	Δ Score	Rank	Charge	MH+ [Da]	ΔM [ppm]	First Scan	Last Scan	RT [min]	MSOrder	Ions Matched	Annotation
	NEEVEEVqEEEVVKTAEETTPEKSELDLANER	1	1	CID	Q8(Deamidated)	41.1203	4.41484	0.041124	2	3	3703.68	-36.3287	3476	3476	63.045	MS2	38/124
	NEEVEEVQEEEVVKTAEETTPEKSELDLAnER	1	1	CID	N30(Deamidated)	79.045	4.35636	0.0538271	3	3	3703.68	-36.3287	3476	3476	63.045	MS2	34/124
	nEEVEEVQEEEVVKTAEETTPEKSELDLANER	1	1	CID	N1(Deamidated)	18.4287	3.56725	0.225215	4	3	3703.68	-36.3287	3476	3476	63.045	MS2	36/124
gi307127742	18.65	2	311	4.3464	manganese-dependent inorganic pyrophosphatase [Streptococcus pneumoniae 670-6B]
	Sequence	# Proteins	# Protein Groups	Activation Type	Modifications	Probability	XCorr	Δ Score	Rank	Charge	MH+ [Da]	ΔM [ppm]	First Scan	Last Scan	RT [min]	MSOrder	Ions Matched	Annotation
	IIAPELAELAGVNLEEYGLAmLK	1	1	CID	M21(Oxidation)	99.3664	4.3464	0	1	2	2473.33	1.70802	5362	5362	85.1169	MS2	23/44
	AEGAEQVILTDHNEFQQSVSDIAEVEVYGVVDHHR	1	1	CID		25.6182	1.84107	0	1	5	3920.87	0.853831	5063	5063	80.8942	MS2	38/272
gi194397775	20.61	5	553	4.32907	cell wall surface anchor family protein [Streptococcus pneumoniae G54]
	Sequence	# Proteins	# Protein Groups	Activation Type	Modifications	Probability	XCorr	Δ Score	Rank	Charge	MH+ [Da]	ΔM [ppm]	First Scan	Last Scan	RT [min]	MSOrder	Ions Matched	Annotation
	EGDLSEKPGDTVLTQAKPEGVTGNTNSLPTPTER	11	2	CID		38.7998	2.20508	0	1	3	3538.76	6.87432	2202	2202	49.2955	MS2	25/132
	ETVDTADVDGTQASPAETTPEQVK	11	2	CID		35.0331	2.12399	0	1	2	2489.15	2.15145	1354	1354	40.0568	MS2	14/46
	ASDnAPWSDnGTAKnPALPPLEGLTKGK	11	2	CID	N4(Deamidated) N10(Deamidated) N15(Deamidated)	8.81424	0.716743	0	1	4	2852.41	17.7311	8	8	5.1277	MS2	19/162
	ANGTQTYKATVK	11	2	CID		3.33495	0.640063	0	1	2	1281.67	-10.9105	1973	1973	46.8273	MS2	6/22
	GQYFYqxALDGnVAGK	1	1	CID	Q6(Deamidated) X7(L) N12(Deamidated)	3.15998	0.57158	0	2	4	1745.85	15.5051	862	862	34.3978	MS2	13/90
gi15900026	15.29	5	857	4.32907	cell wall surface anchor family protein [Streptococcus pneumoniae TIGR4]
	Sequence	# Proteins	# Protein Groups	Activation Type	Modifications	Probability	XCorr	Δ Score	Rank	Charge	MH+ [Da]	ΔM [ppm]	First Scan	Last Scan	RT [min]	MSOrder	Ions Matched	Annotation
	EGDLSEKPGDTVLTQAKPEGVTGNTNSLPTPTER	11	2	CID		38.7998	2.20508	0	1	3	3538.76	6.87432	2202	2202	49.2955	MS2	25/132
	ETVDTADVDGTQASPAETTPEQVK	11	2	CID		35.0331	2.12399	0	1	2	2489.15	2.15145	1354	1354	40.0568	MS2	14/46
	TEVSEETSPSSLDTLFEKDEEAQKNPELTDVLK	3	1	CID		20.1289	1.78036	0	1	3	3708.79	8.29955	3940	3940	67.9074	MS2	18/128
	ASDnAPWSDnGTAKnPALPPLEGLTKGK	11	2	CID	N4(Deamidated) N10(Deamidated) N15(Deamidated)	8.81424	0.716743	0	1	4	2852.41	17.7311	8	8	5.1277	MS2	19/162
	ANGTQTYKATVK	11	2	CID		3.33495	0.640063	0	1	2	1281.67	-10.9105	1973	1973	46.8273	MS2	6/22
gi307127490	28.11	2	185	4.32568	translation initiation factor IF-3 [Streptococcus pneumoniae 670-6B]
	Sequence	# Proteins	# Protein Groups	Activation Type	Modifications	Probability	XCorr	Δ Score	Rank	Charge	MH+ [Da]	ΔM [ppm]	First Scan	Last Scan	RT [min]	MSOrder	Ions Matched	Annotation
	LIGLEGEQLGIKPLSEAQALADNANVDLVLIQPQAKPPVAK	4	1	CID		117.329	4.32568	0	1	4	4261.38	-4.22368	5196	5196	82.3414	MS2	40/240
	MFFSnKTKEVK	2	1	CID	N5(Deamidated)	3.77448	1.01903	0	1	2	1359.69	-8.26658	2531	2531	52.939	MS2	7/20
gi225858729	10.57	2	369	4.24686	gamma-glutamyl kinase [Streptococcus pneumoniae 70585]
	Sequence	# Proteins	# Protein Groups	Activation Type	Modifications	Probability	XCorr	Δ Score	Rank	Charge	MH+ [Da]	ΔM [ppm]	First Scan	Last Scan	RT [min]	MSOrder	Ions Matched	Annotation
	EIIDmAGGAGSSNGTGGmLTK	9	1	CID	M5(Oxidation) M18(Oxidation)	51.3862	2.24437	0	1	2	1998.91	-0.607451	1101	1101	37.3492	MS2	12/40
	GAIPIINENDSVVIDELK	7	1	CID		55.689	2.00249	0	1	2	1939.04	-1.92675	4108	4108	69.7944	MS2	15/34
gi225859256	15.21	6	572	4.23611	phosphomannomutase [Streptococcus pneumoniae 70585]
	Sequence	# Proteins	# Protein Groups	Activation Type	Modifications	Probability	XCorr	Δ Score	Rank	Charge	MH+ [Da]	ΔM [ppm]	First Scan	Last Scan	RT [min]	MSOrder	Ions Matched	Annotation
	AIENPFAVEVADVEIEK	1	1	CID		92.039	4.23611	0	1	2	1872.96	-1.59624	4309	4309	72.0295	MS2	20/32
	QVGADVLVATDPDADR	1	1	CID		58.0168	1.49406	0	1	2	1641.81	-0.774795	2059	2059	47.7576	MS2	12/30
	AIENPFAVEVADVEIEK	1	1	CID		20.2345	1.41485	0	1	2	1872.96	2.31001	4578	4578	75.0711	MS2	9/32
	ASGLIEVIGEAVDIEYLK	1	1	CID		4.44172	1.23211	0	1	2	1919.04	-1.22296	5445	5445	86.225	MS2	7/34
	IKFYIAVVGETNEESQAK	1	1	CID		5.11734	0.80044	0	1	4	2026.04	-12.7116	1578	1578	42.5212	MS2	19/102
	DGSYLNLSGNQIGAIMAK	1	1	CID		2.65893	0.441938	0	1	3	1851.93	2.77139	3520	3520	63.4807	MS2	10/68
gi307127692	12.99	2	308	4.17298	cell division ABC transporter permeae FtsX [Streptococcus pneumoniae 670-6B]
	Sequence	# Proteins	# Protein Groups	Activation Type	Modifications	Probability	XCorr	Δ Score	Rank	Charge	MH+ [Da]	ΔM [ppm]	First Scan	Last Scan	RT [min]	MSOrder	Ions Matched	Annotation
	IEGVSEVQDGGANTER	8	1	CID		80.3121	2.41646	0	1	2	1660.78	-1.07858	934	934	35.3087	MS2	13/30
	IFEGDANPLYDAYIVEANTPNDVK	5	1	CID		52.5383	1.75652	0	1	2	2668.29	13.0078	4373	4373	72.7053	MS2	16/46
gi307126882	10.22	2	450	4.14789	UDP-N-acetylmuramoylalanine--D-glutamate ligase [Streptococcus pneumoniae 670-6B]
	Sequence	# Proteins	# Protein Groups	Activation Type	Modifications	Probability	XCorr	Δ Score	Rank	Charge	MH+ [Da]	ΔM [ppm]	First Scan	Last Scan	RT [min]	MSOrder	Ions Matched	Annotation
	LGAIVTVNDGKPFEDNPAAQSLLEEGIK	7	1	CID		34.6313	4.14789	0	1	3	2925.52	-1.47418	4076	4076	69.4746	MS2	27/108
	STNILATQKALSGFDNSK	7	1	CID		3.31272	0.735339	0.513712	4	2	1894.97	-15.7223	5042	5042	80.6215	MS2	5/34
gi307126429	8.65	6	208	4.138	50S ribosomal protein L3 [Streptococcus pneumoniae 670-6B]
	Sequence	# Proteins	# Protein Groups	Activation Type	Modifications	Probability	XCorr	Δ Score	Rank	Charge	MH+ [Da]	ΔM [ppm]	First Scan	Last Scan	RT [min]	MSOrder	Ions Matched	Annotation
	TVETDGYNAIQVGFDDKR	1	1	CID		77.7907	2.32424	0	1	2	2027.97	0.615596	2544	2544	53.0775	MS2	15/34
	TVETDGYNAIQVGFDDK	1	1	CID		16.7017	1.81376	0	1	2	1871.87	2.24829	3701	3701	65.3662	MS2	10/32
	TVETDGYNAIQVGFDDK	1	1	CID		16.3904	1.37561	0	1	2	1871.87	4.07935	6032	6032	95.4795	MS2	9/32
	TVETDGYNAIQVGFDDK	1	1	CID		33.2258	1.35193	0	1	2	1871.88	9.81665	3405	3405	62.2726	MS2	11/32
	TVETDGYNAIQVGFDDKR	1	1	CID		33.7541	1.13118	0	1	3	2027.97	-0.496484	6290	6290	101.012	MS2	11/68
	TVETDGYNAIQVGFDDKR	1	1	CID		7.9827	0.555895	0.134688	2	3	2027.97	0.0528328	4494	4494	74.1261	MS2	10/68
gi298502087	6.07	6	1268	4.08783	alkaline amylopullulanase [Streptococcus pneumoniae TCH8431/19A]
	Sequence	# Proteins	# Protein Groups	Activation Type	Modifications	Probability	XCorr	Δ Score	Rank	Charge	MH+ [Da]	ΔM [ppm]	First Scan	Last Scan	RT [min]	MSOrder	Ions Matched	Annotation
	NTTTLAQPLTDTAAGSGK	12	2	CID		65.2005	4.08783	0	1	2	1746.89	-0.389092	1557	1557	42.2881	MS2	21/34
	DKDGNPFDYPYFIHDSYDSSDAVNK	13	2	CID		4.73459	1.69884	0	1	4	2909.25	-1.42126	3617	3617	64.4671	MS2	19/144
	SLAAWnSDDAKIDDVHK	1	1	CID	N6(Deamidated)	5.2663	0.882061	0.320838	2	3	1885.88	-8.05959	2906	2906	56.9529	MS2	11/64
	SLAAWnSDDAKIDDVHK	1	1	CID	N6(Deamidated)	8.87506	0.632061	0	1	3	1885.88	-8.79201	6188	6188	98.2553	MS2	11/64
	DDDESIYTNPYYVHDIR	13	2	CID		27.44	0.572084	0	1	2	2114.93	-2.41933	2534	2534	52.9563	MS2	5/32
	DGnPFDYPYFIHDSYDSSDAVnK	13	2	CID	N3(Deamidated) N22(Deamidated)	2.41857	0.415902	0	1	3	2668.1	-4.01395	3616	3616	64.4609	MS2	9/88
gi307126859	3.66	5	1969	4.07071	zinc metalloprotease ZmpB [Streptococcus pneumoniae 670-6B]
	Sequence	# Proteins	# Protein Groups	Activation Type	Modifications	Probability	XCorr	Δ Score	Rank	Charge	MH+ [Da]	ΔM [ppm]	First Scan	Last Scan	RT [min]	MSOrder	Ions Matched	Annotation
	VEEGKEDSAEPAPVEEVGGEVESKPEEK	10	9	CID		114.407	4.07071	0	1	3	2983.39	-2.67184	1628	1628	43.036	MS2	30/108
	EDSAEPAPVEEVGGEVESKPEEK	10	9	CID		12.9099	0.893118	0.0803124	2	3	2441.12	-2.93654	1727	1727	44.0931	MS2	13/88
	LVQNEEHQLNDSPAARqmIR	2	2	CID	Q17(Deamidated) M18(Oxidation)	3.25315	0.786268	0.0610845	2	2	2366.13	-21.6677	4399	4399	72.9777	MS2	4/38
	qEDTqPEVVETKDEAAnQPVEEPK	1	1	CID	Q1(Deamidated) Q5(Deamidated) N17(Deamidated)	6.50321	0.607121	0	1	3	2713.22	-5.37587	4776	4776	77.3178	MS2	12/92
	qEDTqPEVVETKDEAANqPVEEPK	1	1	CID	Q1(Deamidated) Q5(Deamidated) Q18(Deamidated)	6.50321	0.573135	0.055978	2	3	2713.22	-5.37587	4776	4776	77.3178	MS2	12/92
gi221231480	7.2	14	1889	4.07071	zinc metalloproteinase ZmpB [Streptococcus pneumoniae ATCC 700669]
	Sequence	# Proteins	# Protein Groups	Activation Type	Modifications	Probability	XCorr	Δ Score	Rank	Charge	MH+ [Da]	ΔM [ppm]	First Scan	Last Scan	RT [min]	MSOrder	Ions Matched	Annotation
	VEEGKEDSAEPAPVEEVGGEVESKPEEK	10	9	CID		114.407	4.07071	0	1	3	2983.39	-2.67184	1628	1628	43.036	MS2	30/108
	VYDnLTAPYYqGYILPLLTLK	1	1	CID	N4(Deamidated) Q11(Deamidated)	3.25216	1.73914	0	1	3	2460.31	10.846	5144	5144	81.81	MS2	12/80
	SVnTnESKqSDVNEAAEK	1	1	CID	N3(Deamidated) N5(Deamidated) Q9(Deamidated)	7.66156	1.10946	0	1	2	1952.85	-3.9685	2197	2197	49.2511	MS2	10/34
	qAVERDLKKnQLDER	1	1	CID	Q1(Deamidated) N10(Deamidated)	14.5466	1.01932	0.413862	2	2	1843.97	14.5784	2441	2441	51.9494	MS2	8/28
	LKGSENAETFKQLFASETK	1	1	CID		7.43749	0.930311	0.457058	2	3	2128.11	20.7169	3212	3212	60.22	MS2	10/72
	qAVERDLKKNqLDER	1	1	CID	Q1(Deamidated) Q11(Deamidated)	14.5466	0.929166	0.465701	3	2	1843.97	14.5784	2441	2441	51.9494	MS2	7/28
	SVnTnESKQSDVnEAAEK	1	1	CID	N3(Deamidated) N5(Deamidated) N13(Deamidated)	7.66156	0.925801	0.165538	3	2	1952.85	-3.9685	2197	2197	49.2511	MS2	9/34
	EDSAEPAPVEEVGGEVESKPEEK	10	9	CID		12.9099	0.893118	0.0803124	2	3	2441.12	-2.93654	1727	1727	44.0931	MS2	13/88
	QAVERDLKKnqLDER	1	1	CID	N10(Deamidated) Q11(Deamidated)	14.5466	0.725855	0.582611	4	2	1843.97	14.5784	2441	2441	51.9494	MS2	8/28
	nVKPDGNGKSYIK	1	1	CID	N1(Deamidated)	3.66176	0.571442	0	1	2	1420.73	-10.6578	3503	3503	63.3025	MS2	7/24
	NYnDTLMmVDYLEGDAVISKGK	1	1	CID	N3(Deamidated) M8(Oxidation)	7.11408	0.520133	0.688195	4	3	2493.13	-21.5888	3114	3114	59.1609	MS2	13/84
	DLKKNQLDER	1	1	CID		7.50003	0.507413	0.255351	2	2	1258.66	-10.575	6307	6307	101.562	MS2	5/18
	NYnDTLmMVDYLEGDAVISKGK	1	1	CID	N3(Deamidated) M7(Oxidation)	12.1023	0.464005	0.721842	5	3	2493.13	-21.5888	3114	3114	59.1609	MS2	13/84
	nYNDTLMmVDYLEGDAVISKGK	1	1	CID	N1(Deamidated) M8(Oxidation)	7.11408	0.445606	0.732872	6	3	2493.13	-21.5888	3114	3114	59.1609	MS2	12/84
gi116515780	2.83	4	1876	4.07071	zinc metalloprotease ZmpB [Streptococcus pneumoniae D39]
	Sequence	# Proteins	# Protein Groups	Activation Type	Modifications	Probability	XCorr	Δ Score	Rank	Charge	MH+ [Da]	ΔM [ppm]	First Scan	Last Scan	RT [min]	MSOrder	Ions Matched	Annotation
	VEEGKEDSAEPAPVEEVGGEVESKPEEK	10	9	CID		114.407	4.07071	0	1	3	2983.39	-2.67184	1628	1628	43.036	MS2	30/108
	EDSAEPAPVEEVGGEVESKPEEK	10	9	CID		12.9099	0.893118	0.0803124	2	3	2441.12	-2.93654	1727	1727	44.0931	MS2	13/88
	MDKEWRTnADR	1	1	CID	N8(Deamidated)	6.39417	0.890883	0	1	2	1422.65	9.76233	1279	1279	39.2398	MS2	3/20
	EETKTAKGTQEEGK	4	4	CID		3.36998	0.618271	0	1	2	1535.76	7.5454	1848	1848	45.4427	MS2	6/26
gi194397255	5.4	8	1870	4.07071	zinc metalloprotease ZmpB [Streptococcus pneumoniae G54]
	Sequence	# Proteins	# Protein Groups	Activation Type	Modifications	Probability	XCorr	Δ Score	Rank	Charge	MH+ [Da]	ΔM [ppm]	First Scan	Last Scan	RT [min]	MSOrder	Ions Matched	Annotation
	VEEGKEDSAEPAPVEEVGGEVESKPEEK	10	9	CID		114.407	4.07071	0	1	3	2983.39	-2.67184	1628	1628	43.036	MS2	30/108
	IKSISqEEADKK	2	2	CID	Q6(Deamidated)	2.38401	1.39031	0	1	2	1376.72	-8.87419	2060	2060	47.7635	MS2	6/22
	EDSAEPAPVEEVGGEVESKPEEK	10	9	CID		12.9099	0.893118	0.0803124	2	3	2441.12	-2.93654	1727	1727	44.0931	MS2	13/88
	EETKTAKGTQEEGK	4	4	CID		3.36998	0.618271	0	1	2	1535.76	7.5454	1848	1848	45.4427	MS2	6/26
	VLFDKAVEADxAGGGTAKTVELK	1	1	CID	X11(L)	2.68601	0.608243	0	1	3	2332.27	-8.56213	548	548	29.6054	MS2	12/88
	ImMALTYLnR	2	2	CID	M2(Oxidation) N9(Deamidated)	5.67657	0.571258	0.0594724	2	3	1242.61	-10.0576	1492	1492	41.5913	MS2	10/36
	VSnGRFTnLEDWKK	1	1	CID	N3(Deamidated) N8(Deamidated)	2.10163	0.524855	0.837838	3	2	1695.85	15.2933	2585	2585	53.4986	MS2	5/26
	IMmALTYLnR	2	2	CID	M3(Oxidation) N9(Deamidated)	5.67657	0.400384	0.340801	3	3	1242.61	-10.0576	1492	1492	41.5913	MS2	9/36
gi225860655	5.36	10	1902	4.07071	zinc metalloprotease ZmpB [Streptococcus pneumoniae Taiwan19F-14]
	Sequence	# Proteins	# Protein Groups	Activation Type	Modifications	Probability	XCorr	Δ Score	Rank	Charge	MH+ [Da]	ΔM [ppm]	First Scan	Last Scan	RT [min]	MSOrder	Ions Matched	Annotation
	VEEGKEDSAEPAPVEEVGGEVESKPEEK	10	9	CID		114.407	4.07071	0	1	3	2983.39	-2.67184	1628	1628	43.036	MS2	30/108
	IKSISqEEADKK	2	2	CID	Q6(Deamidated)	2.38401	1.39031	0	1	2	1376.72	-8.87419	2060	2060	47.7635	MS2	6/22
	LFTNETDInVWFK	3	2	CID	N9(Deamidated)	23.0494	1.17181	0	1	2	1627.79	-9.37615	1339	1339	39.902	MS2	8/24
	EDSAEPAPVEEVGGEVESKPEEK	10	9	CID		12.9099	0.893118	0.0803124	2	3	2441.12	-2.93654	1727	1727	44.0931	MS2	13/88
	EETKTAKGTQEEGK	4	4	CID		3.36998	0.618271	0	1	2	1535.76	7.5454	1848	1848	45.4427	MS2	6/26
	QILEnEDHQLNDNELAER	1	1	CID	N5(Deamidated)	3.02676	0.594513	0.489643	3	2	2181.02	9.64702	3703	3703	65.3785	MS2	7/34
	qILENEDHQLNDNELAER	1	1	CID	Q1(Deamidated)	3.02676	0.594328	0.489802	4	2	2181.02	9.64702	3703	3703	65.3785	MS2	7/34
	QLLVKRDTK	1	1	CID		4.55052	0.568965	0	1	2	1100.68	2.04036	5619	5619	88.9921	MS2	5/16
	AqLmTDVK	1	1	CID	Q2(Deamidated) M4(Oxidation)	2.37694	0.496985	0	1	2	922.463	7.87592	1582	1582	42.5619	MS2	5/14
	QILENEDHqLNDNELAER	1	1	CID	Q9(Deamidated)	3.02676	0.4592	0.605801	5	2	2181.02	9.64702	3703	3703	65.3785	MS2	5/34
gi15900565	3.99	5	1881	4.07071	zinc metalloprotease ZmpB, [Streptococcus pneumoniae TIGR4]
	Sequence	# Proteins	# Protein Groups	Activation Type	Modifications	Probability	XCorr	Δ Score	Rank	Charge	MH+ [Da]	ΔM [ppm]	First Scan	Last Scan	RT [min]	MSOrder	Ions Matched	Annotation
	VEEGKEDSAEPAPVEEVGGEVESKPEEK	10	9	CID		114.407	4.07071	0	1	3	2983.39	-2.67184	1628	1628	43.036	MS2	30/108
	EDSAEPAPVEEVGGEVESKPEEK	10	9	CID		12.9099	0.893118	0.0803124	2	3	2441.12	-2.93654	1727	1727	44.0931	MS2	13/88
	LVQNEEHQLNDSPAARqmIR	2	2	CID	Q17(Deamidated) M18(Oxidation)	3.25315	0.786268	0.0610845	2	2	2366.13	-21.6677	4399	4399	72.9777	MS2	4/38
	ETnESLITTIPDDK	1	1	CID	N3(Deamidated)	7.46889	0.665318	0	1	3	1576.75	-7.89659	3050	3050	58.4675	MS2	11/52
	SnYYLKITSnnqK	1	1	CID	N2(Deamidated) N10(Deamidated) N11(Deamidated) Q12(Deamidated)	4.40887	0.408182	0	1	2	1576.75	15.7303	2902	2902	56.8995	MS2	3/24
gi307127191	11.89	4	328	3.97042	L-lactate dehydrogenase [Streptococcus pneumoniae 670-6B]
	Sequence	# Proteins	# Protein Groups	Activation Type	Modifications	Probability	XCorr	Δ Score	Rank	Charge	MH+ [Da]	ΔM [ppm]	First Scan	Last Scan	RT [min]	MSOrder	Ions Matched	Annotation
	ELQAIIDEAWKNPEFQEASKN	3	1	CID		69.2165	3.97042	0	1	2	2460.2	0.376142	4009	4009	68.6546	MS2	17/40
	DTQNVQEAELIELFEGVR	3	1	CID		60.6475	1.6488	0	1	3	2090.04	-0.922577	5134	5134	81.68	MS2	21/68
	ELQAIIDEAWK	3	1	CID		29.1136	1.20177	0	1	2	1315.69	4.33981	3670	3670	65.023	MS2	5/20
	DTQNVQEAELIELFEGVR	3	1	CID		12.7694	0.717347	0	1	2	2090.04	1.16606	5127	5127	81.6086	MS2	9/34
gi169833451	7.7	12	2233	3.93985	beta-galactosidase [Streptococcus pneumoniae Hungary19A-6]
	Sequence	# Proteins	# Protein Groups	Activation Type	Modifications	Probability	XCorr	Δ Score	Rank	Charge	MH+ [Da]	ΔM [ppm]	First Scan	Last Scan	RT [min]	MSOrder	Ions Matched	Annotation
	VSVEENNQVASTVVDSGEDSLPVLVR	11	2	CID		70.9702	2.14445	0	1	2	2742.37	-5.75854	3859	3859	67.0151	MS2	15/50
	VSVEGIVSVEEVSVTTPIAEAPQLPESVR	12	3	CID		8.80869	1.88133	0	1	3	3021.6	3.74813	4623	4623	75.5693	MS2	18/112
	VQTIIGEAPEmPTTVPFVYSDGSR	9	2	CID	M11(Oxidation)	47.0524	1.7954	0	1	2	2610.28	0.698486	3507	3507	63.3413	MS2	13/46
	VEGIDLEAR	12	3	CID		14.2414	1.51118	0	1	2	1001.53	-1.12825	1564	1564	42.3768	MS2	10/16
	NGTTILTPKLEEQqHGK	12	3	CID	Q14(Deamidated)	10.4611	0.914026	0.395544	2	2	1894.97	-15.7183	5042	5042	80.6215	MS2	7/32
	NGTTILTPKLEEqQHGK	12	3	CID	Q13(Deamidated)	10.4611	0.804806	0.467773	3	2	1894.97	-15.7183	5042	5042	80.6215	MS2	6/32
	VqFFADSGTDAPSK	4	3	CID	Q2(Deamidated)	14.7935	0.564123	0	1	3	1470.69	11.7398	1232	1232	38.7177	MS2	13/52
	EDqTVKLSVR	12	3	CID	Q3(Deamidated)	11.4179	0.541658	0.081611	2	2	1175.63	1.15792	2010	2010	47.1934	MS2	5/18
	AVTnEEMnQmIEDRK	7	2	CID	N4(Deamidated) N8(Deamidated) M10(Oxidation)	2.4273	0.54104	0	1	2	1825.78	-12.0841	1211	1211	38.5067	MS2	6/28
	RLKqmKEMGVnSIR	12	3	CID	Q4(Deamidated) M5(Oxidation) N11(Deamidated)	2.88592	0.488616	0.464884	3	2	1707.9	11.9337	5178	5178	82.1671	MS2	4/26
	IFTAINPDGSKEEK	11	3	CID		5.23891	0.473018	0	1	2	1548.78	-14.8089	2106	2106	48.2719	MS2	5/26
	LKQMKEmGVNSIR	12	3	CID	M7(Oxidation)	4.1297	0.431816	0	1	2	1549.81	-6.19456	3073	3073	58.7255	MS2	5/24
gi225858084	16.51	2	212	3.86377	adenylate kinase [Streptococcus pneumoniae 70585]
	Sequence	# Proteins	# Protein Groups	Activation Type	Modifications	Probability	XCorr	Δ Score	Rank	Charge	MH+ [Da]	ΔM [ppm]	First Scan	Last Scan	RT [min]	MSOrder	Ions Matched	Annotation
	GLVHDIEGNQDINDVFSDIEK	4	2	CID		69.7289	3.86377	0	1	3	2357.13	0.156309	4202	4202	70.9199	MS2	31/80
	AAMVNQTEMGVLAK	1	1	CID		8.68106	1.18935	0	1	2	1462.74	1.79517	2705	2705	54.7345	MS2	11/26
gi307066908	14.62	2	212	3.86377	adenylate kinase-like kinase [Streptococcus pneumoniae AP200]
	Sequence	# Proteins	# Protein Groups	Activation Type	Modifications	Probability	XCorr	Δ Score	Rank	Charge	MH+ [Da]	ΔM [ppm]	First Scan	Last Scan	RT [min]	MSOrder	Ions Matched	Annotation
	GLVHDIEGNQDINDVFSDIEK	4	2	CID		69.7289	3.86377	0	1	3	2357.13	0.156309	4202	4202	70.9199	MS2	31/80
	TIEqAqALDK	1	1	CID	Q4(Deamidated) Q6(Deamidated)	4.35081	0.875002	0	1	2	1118.56	-0.314725	1453	1453	41.1393	MS2	8/18
gi307126587	14.56	4	474	3.68354	6-phosphogluconate dehydrogenase, decarboxylating [Streptococcus pneumoniae 670-6B]
	Sequence	# Proteins	# Protein Groups	Activation Type	Modifications	Probability	XCorr	Δ Score	Rank	Charge	MH+ [Da]	ΔM [ppm]	First Scan	Last Scan	RT [min]	MSOrder	Ions Matched	Annotation
	KDDEDQDGPIVDYILDAAGNK	2	1	CID		17.6236	2.06083	0	1	2	2291.07	-0.54917	4539	4539	74.6239	MS2	13/40
	NEELANSGINFIGTGVSGGEK	7	1	CID		10.2262	1.62271	0	1	2	2093.02	0.523018	3022	3022	58.1581	MS2	10/40
	TEDVIACHPEK	7	1	CID		7.78275	0.782317	0	1	2	1241.58	1.15481	1954	1954	46.6422	MS2	7/20
	MTKAnFGVVGMAVmGR	5	1	CID	N5(Deamidated) M14(Oxidation)	5.87265	0.41375	0	1	3	1685.8	-13.6182	2517	2517	52.7948	MS2	12/60
gi194398729	11.4	14	930	3.63135	translation initiation factor IF-2 [Streptococcus pneumoniae G54]
	Sequence	# Proteins	# Protein Groups	Activation Type	Modifications	Probability	XCorr	Δ Score	Rank	Charge	MH+ [Da]	ΔM [ppm]	First Scan	Last Scan	RT [min]	MSOrder	Ions Matched	Annotation
	LAEQAQQVQAVVEVVPEK	9	1	CID		56.6441	3.63135	0	1	2	1965.07	2.68739	2638	2638	54.0082	MS2	21/34
	LAEQAQQVQAVVEVVPEK	9	1	CID		6.9837	1.77044	0	1	3	1965.06	-0.621952	2557	2557	53.2164	MS2	17/68
	NQKnSNWNNNKK	9	1	CID	N4(Deamidated)	2.12443	0.899655	0	1	2	1489.73	12.3328	4232	4232	71.2301	MS2	6/22
	SSQNqVRNQKNSnWNNnKK	9	1	CID	Q5(Deamidated) N13(Deamidated) N17(Deamidated)	7.46764	0.876263	0	1	3	2291.07	-8.58234	4749	4749	77.0257	MS2	12/72
	AKRALMK	9	1	CID		3.86642	0.721422	0	1	2	817.509	1.73571	5726	5726	90.6041	MS2	4/12
	nQKNSNWNNNKK	9	1	CID	N1(Deamidated)	7.48673	0.706932	0.214219	2	2	1489.73	12.3328	4232	4232	71.2301	MS2	6/22
	NqKNSNWNNNKK	9	1	CID	Q2(Deamidated)	2.12443	0.706932	0.214219	3	2	1489.73	12.3328	4232	4232	71.2301	MS2	6/22
	NQKNSnWNNNKK	9	1	CID	N6(Deamidated)	2.12443	0.643829	0.28436	6	2	1489.73	12.3328	4232	4232	71.2301	MS2	5/22
	RKqnKGNnR	9	1	CID	Q3(Deamidated) N4(Deamidated) N8(Deamidated)	5.42298	0.593878	0	1	2	1117.57	2.01428	899	899	34.8665	MS2	3/16
	RKqnKGnNR	9	1	CID	Q3(Deamidated) N4(Deamidated) N7(Deamidated)	5.42298	0.573427	0.0344359	2	2	1117.57	2.01428	899	899	34.8665	MS2	3/16
	RFnDqAKKEQGqqK	1	1	CID	N3(Deamidated) Q5(Deamidated) Q12(Deamidated) Q13(Deamidated)	8.55456	0.468492	0	1	2	1708.83	13.6949	3117	3117	59.1792	MS2	4/26
	GnnRDQqqNGNRQKNDGR	9	1	CID	N2(Deamidated) N3(Deamidated) Q7(Deamidated) Q8(Deamidated)	7.83719	0.446354	0.318914	2	3	2102.91	-11.6442	2478	2478	52.3462	MS2	11/68
	qYqAAKEALAqANK	9	1	CID	Q1(Deamidated) Q3(Deamidated) Q11(Deamidated)	7.12536	0.443512	0	1	3	1536.76	3.20804	1070	1070	36.949	MS2	9/52
	EPEEIFEEAAK	9	1	CID		18.6665	0.430617	0	1	2	1291.61	1.91403	2206	2206	49.334	MS2	5/20
gi225859653	14.93	3	355	3.49281	oligopeptide transport ATP-binding protein OppD [Streptococcus pneumoniae 70585]
	Sequence	# Proteins	# Protein Groups	Activation Type	Modifications	Probability	XCorr	Δ Score	Rank	Charge	MH+ [Da]	ΔM [ppm]	First Scan	Last Scan	RT [min]	MSOrder	Ions Matched	Annotation
	GVSLELVEGEVLALVGESGSGK	7	1	CID		53.9682	3.49281	0	1	2	2129.14	2.30263	5483	5483	86.7259	MS2	19/42
	RFNEYPFQYSGGmR	7	1	CID	M13(Oxidation)	8.45685	0.741672	0	1	2	1767.78	-8.79628	2956	2956	57.4487	MS2	5/26
	GqDLTALSSHKDWEQIR	6	1	CID	Q2(Deamidated)	15.1539	0.420565	0.55336	2	3	1984.98	7.14904	4356	4356	72.5398	MS2	9/64
gi221232258	7.72	9	1774	3.46219	collagen-like surface-anchored protein [Streptococcus pneumoniae ATCC 700669]
	Sequence	# Proteins	# Protein Groups	Activation Type	Modifications	Probability	XCorr	Δ Score	Rank	Charge	MH+ [Da]	ΔM [ppm]	First Scan	Last Scan	RT [min]	MSOrder	Ions Matched	Annotation
	DGDGSYTAGKDELVQTTVVK	3	3	CID		4.67288	1.73285	0	1	2	2083.03	7.10935	1781	1781	44.6629	MS2	11/38
	DNGDGSHTIVITNPEGVTTETTVR	5	5	CID		18.7693	1.72934	0	1	2	2513.22	6.29974	2160	2160	48.8982	MS2	15/46
	VVDNGDGTHTITVVNSDGTTTTTTVR	4	4	CID		13.8149	1.39604	0	1	3	2661.3	2.67305	1419	1419	40.7831	MS2	18/100
	DTDAAATPTRNGIR	3	3	CID		14.8555	0.956763	0	1	2	1458.74	13.1021	4130	4130	70.0247	MS2	7/26
	DGKDVLNGKAnPEVnqGK	1	1	CID	N11(Deamidated) N15(Deamidated) Q16(Deamidated)	3.83406	0.862667	0.333053	5	2	1885.9	-14.9059	1661	1661	43.4475	MS2	7/34
	GEKGEqGFQGRDGEQGPKGEDGK	1	1	CID	Q6(Deamidated)	4.99417	0.816206	0.0226498	2	3	2391.09	12.1134	1067	1067	36.9204	MS2	15/88
	DGqDGAQGqAGRDGKDVLNGK	1	1	CID	Q3(Deamidated) Q9(Deamidated)	2.75766	0.579904	0	1	2	2087.97	12.0416	740	740	32.7511	MS2	5/40
	DGqDGAqGQAGRDGKDVLNGK	1	1	CID	Q3(Deamidated) Q7(Deamidated)	2.75766	0.482991	0.167119	2	2	2087.97	12.0416	740	740	32.7511	MS2	5/40
	DGQDGAqGqAGRDGKDVLNGK	1	1	CID	Q7(Deamidated) Q9(Deamidated)	2.75766	0.414082	0.285946	3	2	2087.97	12.0416	740	740	32.7511	MS2	5/40
gi307126648	16.13	1	186	3.45099	translation elongation factor P [Streptococcus pneumoniae 670-6B]
	Sequence	# Proteins	# Protein Groups	Activation Type	Modifications	Probability	XCorr	Δ Score	Rank	Charge	MH+ [Da]	ΔM [ppm]	First Scan	Last Scan	RT [min]	MSOrder	Ions Matched	Annotation
	GATVTGSGKPATmETGLVVNVPDFIEAGQK	1	1	CID	M13(Oxidation)	27.7565	3.45099	0	1	3	2990.51	0.83043	3865	3865	67.0822	MS2	21/116
gi307128170	8.18	2	330	3.42065	aspartate--ammonia ligase [Streptococcus pneumoniae 670-6B]
	Sequence	# Proteins	# Protein Groups	Activation Type	Modifications	Probability	XCorr	Δ Score	Rank	Charge	MH+ [Da]	ΔM [ppm]	First Scan	Last Scan	RT [min]	MSOrder	Ions Matched	Annotation
	VGDGmQDNLSGVENPVSVK	3	1	CID	M5(Oxidation)	56.4186	3.42065	0	1	2	1960.93	-0.984678	1790	1790	44.7605	MS2	15/36
	ETVEKIYK	3	1	CID		2.88221	0.778623	0	1	2	1009.56	0.583135	2823	2823	56.0788	MS2	5/14
gi182683078	10.6	2	302	3.34343	amino acid ABC transporter periplasmic amino acid-binding protein, [Streptococcus pneumoniae CGSP14]
	Sequence	# Proteins	# Protein Groups	Activation Type	Modifications	Probability	XCorr	Δ Score	Rank	Charge	MH+ [Da]	ΔM [ppm]	First Scan	Last Scan	RT [min]	MSOrder	Ions Matched	Annotation
	GFVENNPDLAIADLNFEK	9	3	CID		124.083	3.34343	0	1	2	2005.99	-1.37421	4112	4112	69.8348	MS2	23/34
	DEYRSIIYTIKKNK	2	1	CID		11.8782	0.583662	0	1	2	1770.98	2.18708	558	558	29.704	MS2	6/26
gi225853737	12.31	4	268	3.34343	ABC transporter solute-binding protein - amino acid transport [Streptococcus pneumoniae JJA]
	Sequence	# Proteins	# Protein Groups	Activation Type	Modifications	Probability	XCorr	Δ Score	Rank	Charge	MH+ [Da]	ΔM [ppm]	First Scan	Last Scan	RT [min]	MSOrder	Ions Matched	Annotation
	GFVENNPDLAIADLNFEK	9	3	CID		124.083	3.34343	0	1	2	2005.99	-1.37421	4112	4112	69.8348	MS2	23/34
	SDLVTYqSVnDLAQK	1	1	CID	Q7(Deamidated) N10(Deamidated)	20.1339	1.40766	0.347114	2	2	1682.82	11.2965	1958	1958	46.6799	MS2	11/28
	SDLVTYqSVNDLAqK	1	1	CID	Q7(Deamidated) Q14(Deamidated)	5.843	1.04485	0.515386	3	2	1682.82	11.2965	1958	1958	46.6799	MS2	8/28
	SDLVTYQSVnDLAqK	1	1	CID	N10(Deamidated) Q14(Deamidated)	5.843	0.578269	0.731793	5	2	1682.82	11.2965	1958	1958	46.6799	MS2	4/28
gi307127685	8.46	1	201	3.33471	superoxide dismutase [Streptococcus pneumoniae 670-6B]
	Sequence	# Proteins	# Protein Groups	Activation Type	Modifications	Probability	XCorr	Δ Score	Rank	Charge	MH+ [Da]	ΔM [ppm]	First Scan	Last Scan	RT [min]	MSOrder	Ions Matched	Annotation
	LEVTSTANQDTPISEGK	2	1	CID		120.596	3.33471	0	1	2	1789.88	0.636377	1321	1321	39.68	MS2	19/32
gi307126864	6.58	1	319	3.32448	glucokinase [Streptococcus pneumoniae 670-6B]
	Sequence	# Proteins	# Protein Groups	Activation Type	Modifications	Probability	XCorr	Δ Score	Rank	Charge	MH+ [Da]	ΔM [ppm]	First Scan	Last Scan	RT [min]	MSOrder	Ions Matched	Annotation
	TNILDEGSHIVDDmIESIQHR	8	1	CID	M14(Oxidation)	54.6734	3.32448	0	1	3	2438.16	0.712403	4083	4083	69.5317	MS2	26/80
gi307126794	10.07	3	447	3.28792	cysteinyl-tRNA synthetase [Streptococcus pneumoniae 670-6B]
	Sequence	# Proteins	# Protein Groups	Activation Type	Modifications	Probability	XCorr	Δ Score	Rank	Charge	MH+ [Da]	ΔM [ppm]	First Scan	Last Scan	RT [min]	MSOrder	Ions Matched	Annotation
	NTYEQPFTGNVDAQELQNFK	7	1	CID		91.3314	3.28792	0	1	2	2343.09	3.22731	3175	3175	59.8456	MS2	19/38
	VEKSHNYAK	7	1	CID		4.95738	0.6668	0	1	2	1075.56	9.55837	1430	1430	40.8953	MS2	6/16
	QEARAnRDFATADqIR	3	1	CID	N6(Deamidated) Q14(Deamidated)	6.34902	0.528549	0.805887	2	2	1863.88	-17.5946	4372	4372	72.6994	MS2	5/30
gi307127356	24.18	1	91	3.28616	DNA-binding protein HU 1 [Streptococcus pneumoniae 670-6B]
	Sequence	# Proteins	# Protein Groups	Activation Type	Modifications	Probability	XCorr	Δ Score	Rank	Charge	MH+ [Da]	ΔM [ppm]	First Scan	Last Scan	RT [min]	MSOrder	Ions Matched	Annotation
	DSAAAVEAVFAAVADYLAAGEK	1	1	CID		55.4392	3.28616	0	1	2	2139.06	2.96286	5583	5583	88.4052	MS2	17/42
gi307126581	9.18	8	719	3.28039	penicillin-binding protein 1a [Streptococcus pneumoniae 670-6B]
	Sequence	# Proteins	# Protein Groups	Activation Type	Modifications	Probability	XCorr	Δ Score	Rank	Charge	MH+ [Da]	ΔM [ppm]	First Scan	Last Scan	RT [min]	MSOrder	Ions Matched	Annotation
	EVINQVEqETGYNLLTTGmDVYTNVDQEAQK	2	1	CID	Q8(Deamidated) M19(Oxidation)	40.9583	3.28039	0	1	3	3546.64	1.90828	4660	4660	75.9839	MS2	27/120
	EVINQVEQETGYnLLTTGmDVYTNVDQEAQK	2	1	CID	N13(Deamidated) M19(Oxidation)	40.9583	3.23868	0.0127151	3	3	3546.64	1.90828	4660	4660	75.9839	MS2	27/120
	EVINqVEQETGYNLLTTGmDVYTNVDQEAQK	2	1	CID	Q5(Deamidated) M19(Oxidation)	40.9583	3.12844	0.0463228	4	3	3546.64	1.90828	4660	4660	75.9839	MS2	25/120
	EVInQVEQETGYNLLTTGmDVYTNVDQEAQK	2	1	CID	N4(Deamidated) M19(Oxidation)	40.9583	3.09812	0.055564	6	3	3546.64	1.90828	4660	4660	75.9839	MS2	25/120
	EVINQVEQETGYNLLTTGmDVYTnVDQEAQK	2	1	CID	M19(Oxidation) N24(Deamidated)	2.50952	2.24662	0.315137	7	3	3546.64	1.90828	4660	4660	75.9839	MS2	22/120
	NQLIADLGSERR	9	2	CID		3.17038	0.754424	0.266966	2	2	1371.74	1.672	3700	3700	65.3606	MS2	7/22
	NVTAVETLNK	3	2	CID		8.47664	0.597865	0.389589	3	2	1088.59	-0.00920906	1494	1494	41.6182	MS2	5/18
	AqEAWLAIqLEqK	9	2	CID	Q2(Deamidated) Q9(Deamidated) Q12(Deamidated)	3.4817	0.488033	0	1	2	1530.75	-14.7355	1771	1771	44.5585	MS2	3/24
gi225858224	13.21	5	719	3.28039	penicillin-binding protein 1A [Streptococcus pneumoniae 70585]
	Sequence	# Proteins	# Protein Groups	Activation Type	Modifications	Probability	XCorr	Δ Score	Rank	Charge	MH+ [Da]	ΔM [ppm]	First Scan	Last Scan	RT [min]	MSOrder	Ions Matched	Annotation
	EVINQVEEETGYNLLTTGmDVYTNVDQEAQK	6	1	CID	M19(Oxidation)	40.9583	3.28039	0	2	3	3546.64	1.90428	4660	4660	75.9839	MS2	27/120
	TGTSNYTDEEIENHIK	7	1	CID		15.5584	1.56892	0	1	3	1850.84	-0.0261516	1602	1602	42.7415	MS2	14/60
	NQLIADLGSERR	9	2	CID		3.17038	0.754424	0.266966	2	2	1371.74	1.672	3700	3700	65.3606	MS2	7/22
	SmmTYLSEGSNPEDWNIPEGLYR	8	2	CID	M2(Oxidation) M3(Oxidation)	7.69014	0.72498	0	1	2	2721.17	-5.96901	3913	3913	67.6281	MS2	7/44
	AqEAWLAIqLEqK	9	2	CID	Q2(Deamidated) Q9(Deamidated) Q12(Deamidated)	3.4817	0.488033	0	1	2	1530.75	-14.7355	1771	1771	44.5585	MS2	3/24
gi307127441	14	2	407	3.2709	peptidase T [Streptococcus pneumoniae 670-6B]
	Sequence	# Proteins	# Protein Groups	Activation Type	Modifications	Probability	XCorr	Δ Score	Rank	Charge	MH+ [Da]	ΔM [ppm]	First Scan	Last Scan	RT [min]	MSOrder	Ions Matched	Annotation
	IGFISHmDTADFNAEGVNPQVIENYDGGVIELGNSGFK	11	1	CID	M7(Oxidation)	96.2138	3.2709	0	1	3	4070.91	-0.52455	4545	4545	74.7101	MS2	34/148
	KASmqSIADKMnEELGSNR	2	1	CID	M4(Oxidation) Q5(Deamidated) N12(Deamidated)	8.27541	0.412903	0	1	2	2126.99	18.4623	4128	4128	70.0126	MS2	10/36
gi307127749	39.58	5	96	3.23661	30S ribosomal protein S6 [Streptococcus pneumoniae 670-6B]
	Sequence	# Proteins	# Protein Groups	Activation Type	Modifications	Probability	XCorr	Δ Score	Rank	Charge	MH+ [Da]	ΔM [ppm]	First Scan	Last Scan	RT [min]	MSOrder	Ions Matched	Annotation
	FDSILTDNGATVVESK	2	1	CID		65.3831	3.23661	0	1	2	1695.85	5.39532	2585	2585	53.4986	MS2	17/30
	EGLYHIVNVEANDDAALKEFDR	1	1	CID		7.86927	1.4896	0	1	4	2518.22	-1.3461	3541	3541	63.6799	MS2	20/126
	EGLYHIVNVEANDDAALK	1	1	CID		9.40419	1.43764	0	1	3	1970.98	0.147481	2776	2776	55.5559	MS2	17/68
	EGLYHIVNVEANDDAALKEFDR	1	1	CID		25.2005	1.15905	0.0220461	2	3	2518.21	-7.74135	3542	3542	63.6861	MS2	17/84
	FDSILTDNGATVVESK	2	1	CID		10.6639	1.01735	0	1	2	1695.85	2.09942	3195	3195	60.0563	MS2	11/30
gi225858818	18.21	4	324	3.17269	hypothetical protein SP70585_1066 [Streptococcus pneumoniae 70585]
	Sequence	# Proteins	# Protein Groups	Activation Type	Modifications	Probability	XCorr	Δ Score	Rank	Charge	MH+ [Da]	ΔM [ppm]	First Scan	Last Scan	RT [min]	MSOrder	Ions Matched	Annotation
	VIDETYVQPEYVLGSSLSEDQK	9	1	CID		43.5918	3.17269	0	1	2	2499.22	2.56489	3799	3799	66.4161	MS2	18/42
	VIDETYVQPEYVLGSSLSEDQK	9	1	CID		21.9543	1.20327	0	1	2	2499.21	0.611767	4085	4085	69.544	MS2	8/42
	VTqDMYRNAAVTLGVEHAK	3	1	CID	Q3(Deamidated)	3.06987	0.978766	0	1	2	2104.04	-4.77611	3920	3920	67.6998	MS2	6/36
	TLnDLKqSIVSqAGDSFK	9	1	CID	N3(Deamidated) Q7(Deamidated) Q12(Deamidated)	9.38412	0.503005	0	1	3	1953.97	2.63933	2152	2152	48.822	MS2	9/68
gi169834293	10.01	4	719	3.09812	penicillin-binding protein 1A [Streptococcus pneumoniae Hungary19A-6]
	Sequence	# Proteins	# Protein Groups	Activation Type	Modifications	Probability	XCorr	Δ Score	Rank	Charge	MH+ [Da]	ΔM [ppm]	First Scan	Last Scan	RT [min]	MSOrder	Ions Matched	Annotation
	EVIDQVEQETGYNLLTTGmDVYTNVDQEAQK	3	2	CID	M19(Oxidation)	40.9583	3.09812	0.055564	5	3	3546.64	1.90428	4660	4660	75.9839	MS2	25/120
	AQEAWLAVQLEQKTTKqEILTYYVnK	1	1	CID	Q17(Deamidated) N25(Deamidated)	4.82419	1.3271	0.619481	3	3	3097.59	-20.3509	3904	3904	67.5264	MS2	11/100
	RVnAqAnEIPTDLVK	2	2	CID	N3(Deamidated) Q5(Deamidated) N7(Deamidated)	9.20907	1.0614	0	1	2	1670.86	1.73642	1865	1865	45.6502	MS2	6/28
	AqEAWLAVQLEqK	2	2	CID	Q2(Deamidated) Q12(Deamidated)	7.2308	0.445222	0.277812	4	2	1515.76	-13.8487	2613	2613	53.7487	MS2	3/24
gi225860399	12.8	5	719	3.09812	penicillin-binding protein 1a [Streptococcus pneumoniae Taiwan19F-14]
	Sequence	# Proteins	# Protein Groups	Activation Type	Modifications	Probability	XCorr	Δ Score	Rank	Charge	MH+ [Da]	ΔM [ppm]	First Scan	Last Scan	RT [min]	MSOrder	Ions Matched	Annotation
	EVIDQVEQETGYNLLTTGmDVYTNVDQEAQK	3	2	CID	M19(Oxidation)	40.9583	3.09812	0.055564	5	3	3546.64	1.90428	4660	4660	75.9839	MS2	25/120
	RVnAqAnEIPTDLVK	2	2	CID	N3(Deamidated) Q5(Deamidated) N7(Deamidated)	9.20907	1.0614	0	1	2	1670.86	1.73642	1865	1865	45.6502	MS2	6/28
	SmmTYLSEGSNPEDWNIPEGLYR	8	2	CID	M2(Oxidation) M3(Oxidation)	7.69014	0.72498	0	1	2	2721.17	-5.96901	3913	3913	67.6281	MS2	7/44
	NVTAVETLNK	3	2	CID		8.47664	0.597865	0.389589	3	2	1088.59	-0.00920906	1494	1494	41.6182	MS2	5/18
	AqEAWLAVQLEqK	2	2	CID	Q2(Deamidated) Q12(Deamidated)	7.2308	0.445222	0.277812	4	2	1515.76	-13.8487	2613	2613	53.7487	MS2	3/24
gi307068391	15.89	5	598	3.04963	oligoendopeptidase F [Streptococcus pneumoniae AP200]
	Sequence	# Proteins	# Protein Groups	Activation Type	Modifications	Probability	XCorr	Δ Score	Rank	Charge	MH+ [Da]	ΔM [ppm]	First Scan	Last Scan	RT [min]	MSOrder	Ions Matched	Annotation
	GYDSVFDYLLAEQEVDR	7	1	CID		60.46	3.04963	0	1	2	2018.94	2.0756	4871	4871	78.4556	MS2	13/32
	AGDFEmADFEAHGK	7	1	CID	M6(Oxidation)	39.6568	1.7545	0	1	3	1540.64	0.109024	1343	1343	39.9586	MS2	14/52
	LDLDSALNPEVTIDDAYDLVmK	7	1	CID	M21(Oxidation)	16.4701	1.37563	0	1	2	2466.19	-3.30589	5219	5219	82.6277	MS2	11/42
	TPLESAMIIGADISTDKPLR	7	1	CID		6.88049	0.848867	0.504589	3	3	2128.11	-19.0631	3212	3212	60.22	MS2	9/76
	EDInqFSRDYKGnLHTFENFEK	1	1	CID	N4(Deamidated) Q5(Deamidated) N13(Deamidated)	8.40545	0.591763	0	1	2	2734.21	-18.5297	3926	3926	67.766	MS2	5/42
gi307067666	31.83	7	311	3.02686	hypothetical protein SPAP_1041 [Streptococcus pneumoniae AP200]
	Sequence	# Proteins	# Protein Groups	Activation Type	Modifications	Probability	XCorr	Δ Score	Rank	Charge	MH+ [Da]	ΔM [ppm]	First Scan	Last Scan	RT [min]	MSOrder	Ions Matched	Annotation
	YYVEHPNERPHSDNGFGNASDHVQR	18	12	CID		86.581	3.02686	0	1	4	2925.3	-0.987586	974	974	35.7875	MS2	45/144
	YYVEHPNERPHSDNGFGNASDHVQR	18	12	CID		27.6834	1.76761	0	1	3	2925.31	1.28416	982	982	35.8886	MS2	20/96
	LTYTDDEIQVAK	1	1	CID		30.4444	1.17095	0	1	2	1395.7	0.113682	1586	1586	42.6012	MS2	7/22
	NGQADTNQTEKPSEEKPQTEKPEEETPR	5	4	CID		3.36368	0.887882	0	1	4	3197.48	0.0116325	510	510	28.4082	MS2	28/162
	GYTLEDLLATVK	20	13	CID		31.6484	0.863611	0	1	2	1322.72	-0.365068	4925	4925	79.146	MS2	6/22
	DITSDEGDAYVTPHmTHSHWIK	25	15	CID	M15(Oxidation)	13.7074	0.751742	0	1	5	2556.15	0.913616	1911	1911	46.1575	MS2	29/168
	DITSDEGDAYVTPHmTHSHWIK	25	15	CID	M15(Oxidation)	3.65572	0.595476	0.203806	2	4	2556.15	1.04913	1797	1797	44.8656	MS2	23/126
gi225859599	10.45	5	708	2.99367	cell wall surface anchor family protein [Streptococcus pneumoniae 70585]
	Sequence	# Proteins	# Protein Groups	Activation Type	Modifications	Probability	XCorr	Δ Score	Rank	Charge	MH+ [Da]	ΔM [ppm]	First Scan	Last Scan	RT [min]	MSOrder	Ions Matched	Annotation
	SAEmIASNSTTNGLDNSLSVNSISSNGTIR	10	3	CID	M4(Oxidation)	17.6228	2.99367	0	1	3	3056.44	0.991036	2774	2774	55.5294	MS2	25/116
	ETEQPNIELLR	10	3	CID		33.1211	1.0971	0	1	2	1341.7	-0.322178	2388	2388	51.3312	MS2	8/20
	KSEnVTIqNSYFGKSDK	10	3	CID	N4(Deamidated) Q8(Deamidated)	2.58585	0.575103	0.670311	5	2	1946.92	-18.6684	3629	3629	64.5706	MS2	6/32
[truncated: 826 more rows]

## Sheet: 5335-5 (3)
Accession #	Coverage	# Peptides	#AAs	Score	Description
gi182683460	32.45	36	607	117.668	molecular chaperone DnaK [Streptococcus pneumoniae CGSP14]
	Sequence	# Proteins	# Protein Groups	Activation Type	Modifications	Probability	XCorr	Δ Score	Rank	Charge	MH+ [Da]	ΔM [ppm]	First Scan	Last Scan	RT [min]	MSOrder	Ions Matched	Annotation
	LYEQAAAAQQAQEGAEGAQATGNAGDDVVDGEFTEK	5	1	CID		300	8.68173	0	1	3	3639.63	1.58674	3331	3331	46.1003	MS2	52/140
	LYEQAAAAQQAQEGAEGAQATGNAGDDVVDGEFTEK	5	1	CID		300	8.48601	0	1	3	3639.63	0.488106	2972	2972	43.0547	MS2	50/140
	LYEQAAAAQQAQEGAEGAQATGNAGDDVVDGEFTEK	5	1	CID		300	8.07559	0	1	3	3639.63	1.22053	2611	2611	40.0294	MS2	49/140
	LYEQAAAAQQAQEGAEGAQATGNAGDDVVDGEFTEK	5	1	CID		142.386	7.42385	0	1	3	3639.63	2.31916	3742	3742	49.5222	MS2	48/140
	LYEQAAAAQQAQEGAEGAQATGNAGDDVVDGEFTEK	5	1	CID		73.1708	6.58015	0	1	4	3639.63	2.48882	2994	2994	43.2464	MS2	51/210
	LYEQAAAAQQAQEGAEGAQATGNAGDDVVDGEFTEK	5	1	CID		94.7489	6.02387	0	1	4	3639.63	2.9771	2631	2631	40.2113	MS2	55/210
	LYEQAAAAQQAQEGAEGAQATGNAGDDVVDGEFTEK	5	1	CID		34.6387	5.71745	0	1	3	3639.63	-4.63885	4114	4114	52.5503	MS2	34/140
	SQVFSTAADNQPAVDIHVLQGERPMAADNK	5	1	CID		300	4.75622	0	1	3	3209.56	-0.0129875	3298	3298	45.8274	MS2	35/116
	LYEQAAAAQQAQEGAEGAQATGNAGDDVVDGEFTEK	5	1	CID		60.3911	4.71405	0	1	3	3639.63	0.854317	4487	4487	55.5893	MS2	30/140
	SQVFSTAADNQPAVDIHVLQGERPmAADNK	5	1	CID	M25(Oxidation)	99.8792	4.46962	0	1	3	3225.56	-2.49635	3130	3130	44.4143	MS2	30/116
	LYEQAAAAQQAQEGAEGAQATGNAGDDVVDGEFTEK	5	1	CID		40.9811	4.35695	0	1	3	3639.63	-3.90642	5227	5227	61.6574	MS2	25/140
	EQTIVIQSNSGLTDEEIDR	5	1	CID		86.5088	3.94874	0	1	2	2147.05	-0.151123	2101	2101	35.6246	MS2	21/36
	LYEQAAAAQQAQEGAEGAQATGNAGDDVVDGEFTEK	5	1	CID		11.0978	3.91528	0	1	3	3639.63	-3.54021	8331	8331	89.5625	MS2	23/140
	SVNPDEVVAmGAAIQGGVITGDVK	5	1	CID	M10(Oxidation)	105.707	3.90042	0	1	2	2343.19	0.618877	3389	3389	46.6013	MS2	23/46
	LYEQAAAAQQAQEGAEGAQATGNAGDDVVDGEFTEK	5	1	CID		9.54809	3.70625	0	1	4	3639.64	3.46538	3364	3364	46.3929	MS2	38/210
	SQVFSTAADNQPAVDIHVLQGERPMAADNK	5	1	CID		93.4793	3.69851	0	1	4	3209.57	1.98773	3294	3294	45.7992	MS2	39/174
	SQVFSTAADNQPAVDIHVLQGERPmAADNK	5	1	CID	M25(Oxidation)	61.0343	2.96607	0	1	3	3225.56	0.799552	3499	3499	47.4976	MS2	18/116
	NGEIIVGDAAK	5	1	CID		26.4713	2.93142	0	1	2	1086.58	0.239932	428	428	11.1925	MS2	15/20
	SQVFSTAADNQPAVDIHVLQGERPmAADNK	5	1	CID	M25(Oxidation)	33.7692	2.87329	0	1	4	3225.56	1.94577	3057	3057	43.7796	MS2	30/174
	SQVFSTAADNQPAVDIHVLQGERPMAADNK	5	1	CID		23.4615	2.65227	0	1	4	3209.57	2.23187	4400	4400	54.8924	MS2	28/174
	SQVFSTAADNQPAVDIHVLQGERPmAADNK	5	1	CID	M25(Oxidation)	57.5459	2.44962	0	1	3	3225.56	3.72924	2773	2773	41.4137	MS2	22/116
	NGEIIVGDAAK	5	1	CID		39.8344	2.43027	0	1	2	1086.58	0.362002	1013	1013	20.2725	MS2	13/20
	DAAQAALDDLKK	5	1	CID		53.9045	2.42859	0	1	2	1258.66	0.278799	1592	1592	29.4454	MS2	16/22
	NGEIIVGDAAK	5	1	CID		32.3584	2.30814	0	1	2	1086.58	0.606143	142	142	7.53402	MS2	14/20
	LYEQAAAAQQAQEGAEGAQATGNAGDDVVDGEFTEK	5	1	CID		24.833	2.09886	0	1	3	3639.63	-5.37127	4854	4854	58.5973	MS2	21/140
	DAAQAALDDLKK	5	1	CID		69.5868	1.91354	0	1	2	1258.66	0.88915	332	332	10.1249	MS2	14/22
	EEVDLRnEVDqAIFATEKTIKETEGK	5	1	CID	N7(Deamidated) Q11(Deamidated)	8.20508	1.52793	0	1	4	2994.48	1.47823	2815	2815	41.7575	MS2	25/150
	DAAQAALDDLKK	5	1	CID		25.3769	1.47306	0	1	2	1258.66	0.522939	1411	1411	26.4406	MS2	9/22
	NGEIIVGDAAK	5	1	CID		27.8122	1.44239	0	1	2	1086.58	0.239932	634	634	14.231	MS2	11/20
	SQVFSTAADNQPAVDIHVLQGERPMAADNK	5	1	CID		9.61841	1.10089	0.294456	2	4	3209.57	0.767023	4773	4773	57.9691	MS2	31/174
	EnGIDLSTDKmAmqRLKDAAEK	5	1	CID	N2(Deamidated) M11(Oxidation) M13(Oxidation) Q14(Deamidated)	12.3377	1.04265	0	1	2	2498.18	0.297267	4700	4700	57.3452	MS2	7/42
	DLGTqKEqTIVIqSnSGLTDEEIDR	5	1	CID	Q5(Deamidated) Q8(Deamidated) Q13(Deamidated) N15(Deamidated)	10.9336	0.942207	0	1	3	2793.3	-15.1268	6918	6918	75.5248	MS2	17/96
	AQEnNNLDDmK	1	1	CID	N4(Deamidated) M10(Oxidation)	10.0048	0.550074	0	2	2	1308.54	-0.0232559	399	399	10.814	MS2	4/20
	AQENNnLDDmK	1	1	CID	N6(Deamidated) M10(Oxidation)	19.2469	0.483087	0.121777	3	2	1308.54	-0.0232559	399	399	10.814	MS2	4/20
	AQENnNLDDmK	1	1	CID	N5(Deamidated) M10(Oxidation)	10.0048	0.458337	0.166771	4	2	1308.54	-0.0232559	399	399	10.814	MS2	4/20
	AqENNNLDDmK	1	1	CID	Q2(Deamidated) M10(Oxidation)	3.14909	0.408576	0.257234	5	2	1308.54	-0.0232559	399	399	10.814	MS2	4/20
gi225858942	15.13	38	1943	58.0859	immunoglobulin A1 protease [Streptococcus pneumoniae 70585]
	Sequence	# Proteins	# Protein Groups	Activation Type	Modifications	Probability	XCorr	Δ Score	Rank	Charge	MH+ [Da]	ΔM [ppm]	First Scan	Last Scan	RT [min]	MSOrder	Ions Matched	Annotation
	TEEVPVKPTEETPVNPNEGTTEGTSIQEAENPVQPAEESTTNSEK	5	3	CID		94.7223	5.75588	0	1	4	4824.23	-0.800086	2248	2248	36.868	MS2	52/264
	IDFQEEIQENPDLAEGTVR	9	5	CID		137.902	5.46307	0	1	2	2203.05	0.364111	3347	3347	46.2448	MS2	23/36
	DVQSGAIVEPALQPELPEAVVSDK	1	1	CID		67.0305	4.32842	0	2	2	2491.29	0.987471	3739	3739	49.4995	MS2	22/46
	IDFQEEIQENPDLAEGTVR	9	5	CID		79.4033	3.70424	0	1	2	2203.04	-6.96011	2992	2992	43.2297	MS2	21/36
	IDFQEEIQENPDLAEGTVR	9	5	CID		82.5452	3.49516	0	1	3	2203.05	1.38826	3262	3262	45.4939	MS2	29/72
	GEPAIQPELPEAVVTDKGEPAVQPELPEAVVSDK	1	1	CID		18.4506	3.10537	0	1	3	3538.83	10.4982	4219	4219	53.4319	MS2	24/132
	VSPDTSSENTGEVSSNPSDSTTSVGESNQPEK	1	1	CID		50.7319	3.07496	0	1	3	3253.42	8.69299	136	136	7.49034	MS2	33/124
	DVQSGAIVEPALQPELPEAVVSDK	1	1	CID		49.3912	2.95772	0	1	2	2491.29	0.0109081	4109	4109	52.5124	MS2	20/46
	GEPAIQPELPEAVVTDK	1	1	CID		60.4709	2.9071	0	1	2	1792.93	2.04075	2772	2772	41.4078	MS2	16/32
	GVPEVQPALPEAVVTDKGEPAIQPELPEAVVTDK	1	1	CID		19.4349	2.67916	0	1	3	3522.86	-1.06459	5037	5037	60.1065	MS2	25/132
	SDQTVGGLAGLVDQDAHIQNSYAEGDINNVK	2	1	CID		36.8145	2.6237	0	1	3	3228.54	3.67127	4263	4263	53.8094	MS2	29/120
	GEPAIQPELPEAVVTDKGEPAVQPELPEAVVSDKGEPEQVAPLPEYK	1	1	CID		109.381	2.58285	0	1	4	4976.54	8.64398	4876	4876	58.7834	MS2	47/276
	GEPAIQPELPEAVVTDKGEPAVQPELPEAVVSDKGEPEQVAPLPEYK	1	1	CID		48.1133	2.56021	0	1	4	4976.54	10.5971	5268	5268	61.9917	MS2	42/276
	GEPAIQPELPEAVVTDK	1	1	CID		31.2134	2.46484	0	1	2	1792.93	-0.400654	2416	2416	38.3855	MS2	15/32
	SDQTVGGLAGLVDQDAHIQNSYAEGDINNVK	2	1	CID		55.0216	2.4364	0	1	3	3228.54	-2.1881	8308	8308	89.1228	MS2	28/120
	DVQSGAIVEPALQPELPEAVVSDK	1	1	CID		2.63888	2.3446	0	2	3	2491.29	0.851954	3884	3884	50.6986	MS2	20/92
	GEPAIQPELPEAVVTDKGEPAVQPELPEAVVSDKGEPEQVAPLPEYK	1	1	CID		38.7109	2.24211	0	1	5	4976.53	-0.890955	4692	4692	57.2849	MS2	49/368
	GEPAVQPELPEAVVSDKGEPEQVAPLPEYK	1	1	CID		11.1974	2.07188	0	1	3	3202.62	1.57932	3497	3497	47.4804	MS2	20/116
	VSPDTSSENTGEVSSNPSDSTTSVGESNQPEK	1	1	CID		59.9188	1.94523	0	1	3	3253.41	1.36877	1301	1301	24.792	MS2	27/124
	GEPAIQPELPEAVVTDK	1	1	CID		28.7321	1.90294	0	1	2	1792.93	1.55247	3134	3134	44.4424	MS2	8/32
	WYNFnYGQVnVKDLVMYHPDFFGK	3	2	CID	N5(Deamidated) N10(Deamidated)	3.008	1.78652	0.146442	2	4	2983.39	14.9386	290	290	9.54759	MS2	19/138
	GVPEVQPALPEAVVTDKGEPAIQPELPEAVVTDK	1	1	CID		20.5897	1.77486	0	1	3	3522.85	-4.36049	8311	8311	89.1514	MS2	18/132
	WYnFNYGQVnVKDLVMYHPDFFGK	3	2	CID	N3(Deamidated) N10(Deamidated)	3.008	1.76961	0.154521	3	4	2983.39	14.9386	290	290	9.54759	MS2	19/138
	GVPEVQPALPEAVVTDK	2	2	CID		38.168	1.62739	0	1	2	1748.94	-0.0726075	2765	2765	41.3533	MS2	15/32
	VSPDTSSENTGEVSSNPSDSTTSVGESNQPEK	1	1	CID		33.1031	1.62607	0	1	3	3253.41	0.636348	1101	1101	21.7575	MS2	21/124
	WYNFNYGqVnVKDLVMYHPDFFGK	3	2	CID	Q8(Deamidated) N10(Deamidated)	3.008	1.53612	0.266075	5	4	2983.39	14.9386	290	290	9.54759	MS2	19/138
	GEPAVQPELPEAVVSDK	2	2	CID		8.26858	1.47668	0	1	2	1764.91	5.87493	2059	2059	35.2601	MS2	8/32
	VSPDTSSENTGEVSSNPSDSTTSVGESNQPEK	1	1	CID		62.5492	1.3432	0	1	3	3253.42	7.22815	1576	1576	29.1837	MS2	20/124
	GEPEQVAPLPEYK	7	4	CID		34.6684	1.31844	0	1	2	1456.73	-0.0421778	1713	1713	31.1847	MS2	9/24
	GEPAIQPELPEAVVTDK	1	1	CID		10.2231	1.24314	0	1	3	1792.94	6.23873	2598	2598	39.9199	MS2	16/64
	GVPEVQPALPEAVVTDKGEPAIQPELPEAVVTDK	1	1	CID		5.40192	1.23879	0.224947	5	3	3522.86	0.400255	4668	4668	57.0881	MS2	18/132
	FDSSNPAMKnFFGPVGNK	4	3	CID	N10(Deamidated)	5.9175	1.20927	0	1	2	1957.92	9.20253	1890	1890	33.4677	MS2	8/34
	DTFTGRLIGEKDGKnYAIYNLK	4	2	CID	N15(Deamidated)	4.4812	1.03483	0.212511	2	3	2517.28	-14.1414	3043	3043	43.6653	MS2	11/84
	FDSSNPAMKNFFGPVGnK	4	3	CID	N17(Deamidated)	5.9175	1.00163	0.17171	3	2	1957.92	9.20253	1890	1890	33.4677	MS2	7/34
	VSPDTSSENTGEVSSNPSDSTTSVGESNQPEK	1	1	CID		56.2668	0.999915	0	1	3	3253.42	6.12951	366	366	10.481	MS2	26/124
	NDIGSLANEATNGTK	3	2	CID		5.10744	0.873318	0	1	2	1504.72	-3.35472	1569	1569	29.0653	MS2	6/28
	GVPEVQPALPEAVVTDK	2	2	CID		40.3491	0.806257	0	1	2	1748.94	0.903955	2406	2406	38.3118	MS2	12/32
	GVPEVQPALPEAVVTDK	2	2	CID		4.85303	0.770637	0	1	2	1748.94	2.00259	3128	3128	44.3983	MS2	7/32
gi225858695	25.95	22	501	52.2128	pyruvate kinase [Streptococcus pneumoniae 70585]
	Sequence	# Proteins	# Protein Groups	Activation Type	Modifications	Probability	XCorr	Δ Score	Rank	Charge	MH+ [Da]	ΔM [ppm]	First Scan	Last Scan	RT [min]	MSOrder	Ions Matched	Annotation
	SEVSDVFNAVIDGTDATMLSGESANGK	7	2	CID		90.5856	5.21098	0	1	2	2714.24	-2.10308	6071	6071	68.4931	MS2	21/52
	SEVSDVFNAVIDGTDATmLSGESANGK	7	2	CID	M18(Oxidation)	41.9869	4.42346	0	1	3	2730.24	1.01535	5233	5233	61.7074	MS2	29/104
	IENQQGIDNLDEIIEAADGIMIAR	6	2	CID		48.3548	4.10239	0	1	3	2641.31	-3.64545	7671	7671	82.2977	MS2	30/92
	IENQQGIDNLDEIIEAADGIMIAR	6	2	CID		60.2298	3.8119	0	1	3	2641.32	3.67877	7307	7307	78.9873	MS2	26/92
	SEVSDVFNAVIDGTDATMLSGESANGK	7	2	CID		22.5679	3.74795	0	1	3	2714.25	8.25945	6286	6286	70.2093	MS2	29/104
	IENQQGIDNLDEIIEAADGImIAR	6	2	CID	M21(Oxidation)	89.4465	3.70639	0	1	2	2657.32	7.61755	5804	5804	66.3129	MS2	22/46
	IENQQGIDNLDEIIEAADGImIAR	6	2	CID	M21(Oxidation)	99.324	3.62644	0	1	2	2657.31	0.537471	6186	6186	69.4148	MS2	23/46
	IENQQGIDNLDEIIEAADGIMIAR	6	2	CID		48.7452	3.20609	0	1	3	2641.31	0.382872	7964	7964	85.3141	MS2	27/92
	SEVSDVFNAVIDGTDATMLSGESANGKYPLESVTTmATIDK	7	2	CID	M36(Oxidation)	3.81608	3.20456	0	1	4	4280.02	7.63116	6653	6653	73.0766	MS2	29/240
	IENQQGIDNLDEIIEAADGIMIAR	6	2	CID		53.7053	3.05818	0	1	2	2641.32	3.99739	6733	6733	73.7686	MS2	17/46
	SEVSDVFNAVIDGTDATmLSGESANGK	7	2	CID	M18(Oxidation)	71.9679	2.64345	0	1	2	2730.24	-0.924326	5122	5122	60.8266	MS2	15/52
	AVEAGLVESGDDIVIVAGVPVGEAVR	6	2	CID		29.0993	2.39811	0	1	2	2521.35	-0.0936231	4763	4763	57.8883	MS2	18/50
	GDmGIEVPFEMVPVYQK	6	1	CID	M3(Oxidation)	16.8229	2.37369	0	1	2	1954.93	-0.858115	4323	4323	54.287	MS2	16/32
	GDMGIEVPFEmVPVYQK	6	1	CID	M11(Oxidation)	31.8415	2.34313	0	1	2	1954.93	-1.46847	3949	3949	51.23	MS2	13/32
	IENQQGIDNLDEIIEAADGIMIAR	6	2	CID		21.2101	2.33411	0	1	3	2641.31	-1.08197	8250	8250	88.5312	MS2	24/92
	GDMGIEVPFEmVPVYQK	6	1	CID	M11(Oxidation)	4.05583	2.03404	0.143087	2	2	1954.93	-0.858115	4323	4323	54.287	MS2	14/32
	IENQQGIDNLDEIIEAADGIMIAR	6	2	CID		31.9043	1.6023	0	1	3	2641.32	1.11529	6966	6966	75.9192	MS2	20/92
	GDMGIEVPFEMVPVYQK	6	1	CID		14.5378	1.34234	0	1	2	1938.94	1.74731	5155	5155	61.0718	MS2	9/32
	SEVSDVFNAVIDGTDATmLSGESANGK	7	2	CID	M18(Oxidation)	43.3679	1.25798	0	1	2	2730.24	-2.38917	5513	5513	64.0017	MS2	10/52
	GDmGIEVPFEMVPVYQK	6	1	CID	M3(Oxidation)	3.2639	1.19705	0.489121	2	2	1954.93	-1.46847	3949	3949	51.23	MS2	8/32
	FGEDGYWGEKLDVEASAK	6	2	CID		14.0922	0.830596	0	1	3	2000.93	2.1041	2736	2736	41.1144	MS2	15/68
	GDmGIEVPFEmVPVYQKmIIK	6	1	CID	M3(Oxidation) M11(Oxidation) M18(Oxidation)	7.98334	0.807125	0.72697	2	2	2472.23	4.40794	5260	5260	61.9203	MS2	7/40
gi307126489	20.2	23	693	49.2716	translation elongation factor G [Streptococcus pneumoniae 670-6B]
	Sequence	# Proteins	# Protein Groups	Activation Type	Modifications	Probability	XCorr	Δ Score	Rank	Charge	MH+ [Da]	ΔM [ppm]	First Scan	Last Scan	RT [min]	MSOrder	Ions Matched	Annotation
	AEIYTNDLGTDILEEDIPAEYLDQAQEYR	6	1	CID		117.096	6.91198	0	1	3	3387.58	1.93025	6070	6070	68.487	MS2	41/112
	IGETHEGASQMDWMEQEQER	6	1	CID		58.491	4.88591	0	1	3	2391	1.15318	1910	1910	33.7182	MS2	28/76
	AEIYTNDLGTDILEEDIPAEYLDQAQEYR	6	1	CID		78.1106	4.67435	0	1	3	3387.57	-2.09807	8128	8128	87.32	MS2	32/112
	MKAEIYTNDLGTDILEEDIPAEYLDQAQEYR	6	1	CID		4.42788	4.33428	0	1	3	3646.72	8.67217	5710	5710	65.5991	MS2	20/120
	AEIYTNDLGTDILEEDIPAEYLDQAQEYR	6	1	CID		79.2213	4.30013	0	1	3	3387.58	2.29647	7487	7487	80.6499	MS2	26/112
	AEIYTNDLGTDILEEDIPAEYLDQAQEYR	6	1	CID		56.7835	4.09289	0	1	3	3387.57	-0.267011	6455	6455	71.5609	MS2	32/112
	VLDGAVTVLDSQSGVEPQTETVWR	6	1	CID		40.4591	3.56192	0	1	2	2586.31	1.00036	3888	3888	50.7263	MS2	20/46
	AEIYTNDLGTDILEEDIPAEYLDQAQEYR	6	1	CID		49.9132	3.30621	0	1	3	3387.58	9.25447	7848	7848	84.0117	MS2	34/112
	IGETHEGASQMDWmEQEQER	6	1	CID	M14(Oxidation)	47.3186	3.15726	0	1	3	2406.99	-1.87949	192	192	7.90193	MS2	19/76
	GINPDTDAEETRPASDEEPFAALAFK	3	1	CID		126.222	3.1545	0	1	3	2791.31	1.85108	3946	3946	51.2016	MS2	33/100
	GINPDTDAEETRPASDEEPFAALAFK	3	1	CID		40.3735	2.37393	0	1	3	2791.31	0.752442	4314	4314	54.2156	MS2	26/100
	GINPDTDAEETRPASDEEPFAALAFK	3	1	CID		16.2624	2.31153	0	1	3	2791.31	7.52734	5766	5766	66.029	MS2	21/100
	YLEGEEITNEELK	6	1	CID		12.7216	2.20671	0	1	2	1566.75	-3.61784	1743	1743	31.5716	MS2	11/24
	VETNVETGETVISGMGELHLDVLVDR	6	1	CID		21.3002	1.97162	0	1	3	2812.4	-1.0834	5614	5614	64.7735	MS2	18/100
	IGETHEGASQmDWMEQEQER	6	1	CID	M11(Oxidation)	26.7394	1.85221	0.413347	2	3	2406.99	-1.87949	192	192	7.90193	MS2	14/76
	GINPDTDAEETRPASDEEPFAALAFK	3	1	CID		13.0815	1.81864	0	1	3	2791.31	0.752442	5301	5301	62.2379	MS2	15/100
	IGETHEGASQmDWMEQEQER	6	1	CID	M11(Oxidation)	19.7838	1.45899	0	1	3	2407	3.24746	1361	1361	25.7156	MS2	14/76
	IGETHEGASQMDWmEQEQER	6	1	CID	M14(Oxidation)	5.23075	1.4531	0	1	3	2406.99	1.2333	1546	1546	28.7268	MS2	14/76
	IGETHEGASQmDWMEQEQER	6	1	CID	M11(Oxidation)	9.42168	1.42749	0	1	3	2407	3.43057	1754	1754	31.7325	MS2	15/76
	IGETHEGASQmDWMEQEQER	6	1	CID	M11(Oxidation)	5.23075	1.29732	0.10721	2	3	2406.99	1.2333	1546	1546	28.7268	MS2	12/76
	IGETHEGASQMDWmEQEQER	6	1	CID	M14(Oxidation)	13.2813	1.2824	0.121033	2	3	2407	3.24746	1361	1361	25.7156	MS2	14/76
	GINPDTDAEETRPASDEEPFAALAFK	3	1	CID		7.95277	1.12386	0	1	2	2791.3	-3.32347	3863	3863	50.534	MS2	10/50
	IGETHEGASQMDWmEQEQER	6	1	CID	M14(Oxidation)	9.42168	0.402838	0.717801	2	3	2407	3.43057	1754	1754	31.7325	MS2	13/76
gi307126614	35.83	25	427	48.0002	trigger factor [Streptococcus pneumoniae 670-6B]
	Sequence	# Proteins	# Protein Groups	Activation Type	Modifications	Probability	XCorr	Δ Score	Rank	Charge	MH+ [Da]	ΔM [ppm]	First Scan	Last Scan	RT [min]	MSOrder	Ions Matched	Annotation
	EEAYKDAVEGAAIDTAVENAEIVELPEEMIHEEVHR	8	1	CID		300	5.59524	0	1	3	4035.92	2.86537	6188	6188	69.4303	MS2	46/140
	EVPALDDELAKDIDEEVETLADLK	9	1	CID		102.654	4.79706	0	1	2	2670.33	1.19989	6821	6821	74.7403	MS2	21/46
	EEAYKDAVEGAAIDTAVENAEIVELPEEMIHEEVHR	8	1	CID		59.3381	4.07463	0	1	4	4035.91	0.715695	6533	6533	72.1467	MS2	41/210
	EEAYKDAVEGAAIDTAVENAEIVELPEEMIHEEVHR	8	1	CID		14.8128	4.02966	0	1	5	4035.92	2.04502	6538	6538	72.1844	MS2	46/280
	EVEQLAADYNmEVAQVQNLLSADmLK	8	1	CID	M11(Oxidation) M24(Oxidation)	71.5526	3.99581	0	1	3	2954.42	11.7951	6217	6217	69.6605	MS2	31/100
	DAVEGAAIDTAVENAEIVELPEEmIHEEVHR	9	1	CID	M24(Oxidation)	47.1855	3.76323	0	1	3	3431.63	3.15998	5042	5042	60.1445	MS2	27/120
	EEAYKDAVEGAAIDTAVENAEIVELPEEmIHEEVHR	8	1	CID	M29(Oxidation)	131.587	3.48569	0	1	3	4051.92	11.3683	5010	5010	59.9033	MS2	33/140
	EVEQLAADYNMEVAQVQNLLSADmLK	8	1	CID	M24(Oxidation)	81.8157	3.47391	0	1	3	2938.42	-1.8348	6446	6446	71.49	MS2	31/100
	EEAYKDAVEGAAIDTAVENAEIVELPEEMIHEEVHR	8	1	CID		43.973	2.79956	0	1	4	4035.92	3.88952	6151	6151	69.1376	MS2	38/210
	DAVEGAAIDTAVENAEIVELPEEMIHEEVHR	9	1	CID		33.8391	2.74404	0	1	3	3415.64	9.67166	6285	6285	70.2032	MS2	25/120
	QGINPDMYFQITGTTQEDLHNQYQAEAESR	9	1	CID		10.526	2.6903	0	1	3	3484.57	-3.03295	4300	4300	54.101	MS2	20/116
	EEAYKDAVEGAAIDTAVENAEIVELPEEMIHEEVHR	8	1	CID		37.3253	2.67744	0	1	5	4035.91	-2.83779	8297	8297	89.0052	MS2	45/280
	DIDEEVETLADLK	9	1	CID		29.5652	2.54088	0	1	2	1489.73	0.451221	3973	3973	51.4339	MS2	15/24
	EVPALDDELAKDIDEEVETLADLK	9	1	CID		11.9329	2.37558	0	1	3	2670.33	7.77824	7594	7594	81.5238	MS2	27/92
	DIDEEVETLADLK	9	1	CID		2.45436	1.63458	0	1	2	1489.73	-1.37983	5199	5199	61.4379	MS2	14/24
	EEAYKDAVEGAAIDTAVENAEIVELPEEmIHEEVHR	8	1	CID	M29(Oxidation)	6.47537	1.56817	0.0780813	2	4	4051.91	7.0214	4971	4971	59.5476	MS2	27/210
	AEGFDASEEEIQK	9	1	CID		55.5953	1.56495	0	1	2	1452.65	4.0304	163	163	7.6775	MS2	13/24
	AEGFDASEEEIQK	9	1	CID		37.9694	1.4248	0	1	2	1452.65	1.22278	1430	1430	26.7194	MS2	7/24
	EVEQLAADYnmEVAqVQNLLSADmLK	8	1	CID	N10(Deamidated) M11(Oxidation) Q15(Deamidated) M24(Oxidation)	7.60239	1.27177	0.798951	3	3	2956.4	19.8373	2933	2933	42.6896	MS2	17/100
	FGEEALYQDAMNALLPNAYEAAVK	3	1	CID		8.25607	1.16836	0.39781	5	3	2628.26	-3.70357	6337	6337	70.6121	MS2	12/92
	EVEQLAADYnmEVAQVQnLLSADmLK	8	1	CID	N10(Deamidated) M11(Oxidation) N18(Deamidated) M24(Oxidation)	3.80506	1.13703	0.738316	6	3	2956.4	20.936	3284	3284	45.6965	MS2	12/100
	EVEQLAADYnmEVAQVQnLLSADmLK	8	1	CID	N10(Deamidated) M11(Oxidation) N18(Deamidated) M24(Oxidation)	7.60239	1.11787	0.82328	6	3	2956.4	19.8373	2933	2933	42.6896	MS2	15/100
	EVEQLAADYnmEVAqVQNLLSADmLK	8	1	CID	N10(Deamidated) M11(Oxidation) Q15(Deamidated) M24(Oxidation)	3.80506	1.11743	0.742826	7	3	2956.4	20.936	3284	3284	45.6965	MS2	13/100
	DIDEEVETLADLK	9	1	CID		3.62568	1.04651	0	1	2	1489.73	0.20708	4341	4341	54.4479	MS2	6/24
	DIDEEVETLADLK	9	1	CID		19.7557	0.915988	0.260878	2	2	1489.73	0.32915	4821	4821	58.3324	MS2	10/24
gi307127551	26.15	17	501	47.496	pyruvate kinase [Streptococcus pneumoniae 670-6B]
	Sequence	# Proteins	# Protein Groups	Activation Type	Modifications	Probability	XCorr	Δ Score	Rank	Charge	MH+ [Da]	ΔM [ppm]	First Scan	Last Scan	RT [min]	MSOrder	Ions Matched	Annotation
	SEVSDVFNAVIDGTDATMLSGESANGK	7	2	CID		90.5856	5.21098	0	1	2	2714.24	-2.10308	6071	6071	68.4931	MS2	21/52
	SEVSDVFNAVIDGTDATmLSGESANGK	7	2	CID	M18(Oxidation)	41.9869	4.42346	0	1	3	2730.24	1.01535	5233	5233	61.7074	MS2	29/104
	IENQQGIDNLDEIIEAADGIMIAR	6	2	CID		48.3548	4.10239	0	1	3	2641.31	-3.64545	7671	7671	82.2977	MS2	30/92
	IENQQGIDNLDEIIEAADGIMIAR	6	2	CID		60.2298	3.8119	0	1	3	2641.32	3.67877	7307	7307	78.9873	MS2	26/92
	SEVSDVFNAVIDGTDATMLSGESANGK	7	2	CID		22.5679	3.74795	0	1	3	2714.25	8.25945	6286	6286	70.2093	MS2	29/104
	IENQQGIDNLDEIIEAADGImIAR	6	2	CID	M21(Oxidation)	89.4465	3.70639	0	1	2	2657.32	7.61755	5804	5804	66.3129	MS2	22/46
	IENQQGIDNLDEIIEAADGImIAR	6	2	CID	M21(Oxidation)	99.324	3.62644	0	1	2	2657.31	0.537471	6186	6186	69.4148	MS2	23/46
	IENQQGIDNLDEIIEAADGIMIAR	6	2	CID		48.7452	3.20609	0	1	3	2641.31	0.382872	7964	7964	85.3141	MS2	27/92
	SEVSDVFNAVIDGTDATMLSGESANGKYPLESVTTmATIDK	7	2	CID	M36(Oxidation)	3.81608	3.20456	0	1	4	4280.02	7.63116	6653	6653	73.0766	MS2	29/240
	IENQQGIDNLDEIIEAADGIMIAR	6	2	CID		53.7053	3.05818	0	1	2	2641.32	3.99739	6733	6733	73.7686	MS2	17/46
	SEVSDVFNAVIDGTDATmLSGESANGK	7	2	CID	M18(Oxidation)	71.9679	2.64345	0	1	2	2730.24	-0.924326	5122	5122	60.8266	MS2	15/52
	AVEAGLVESGDDIVIVAGVPVGEAVR	6	2	CID		29.0993	2.39811	0	1	2	2521.35	-0.0936231	4763	4763	57.8883	MS2	18/50
	IENQQGIDNLDEIIEAADGIMIAR	6	2	CID		21.2101	2.33411	0	1	3	2641.31	-1.08197	8250	8250	88.5312	MS2	24/92
	IENQQGIDNLDEIIEAADGIMIAR	6	2	CID		31.9043	1.6023	0	1	3	2641.32	1.11529	6966	6966	75.9192	MS2	20/92
	SEVSDVFNAVIDGTDATmLSGESANGK	7	2	CID	M18(Oxidation)	43.3679	1.25798	0	1	2	2730.24	-2.38917	5513	5513	64.0017	MS2	10/52
	FGEDGYWGEKLDVEASAK	6	2	CID		14.0922	0.830596	0	1	3	2000.93	2.1041	2736	2736	41.1144	MS2	15/68
	GDMGIEVPFEmVPAYqKmIIKK	1	1	CID	M11(Oxidation) Q16(Deamidated) M18(Oxidation)	7.848	0.584448	0.836576	6	2	2557.28	5.59202	4939	4939	59.31	MS2	6/42
gi307127077	34.43	16	122	47.161	50S ribosomal protein L7/L12 [Streptococcus pneumoniae 670-6B]
	Sequence	# Proteins	# Protein Groups	Activation Type	Modifications	Probability	XCorr	Δ Score	Rank	Charge	MH+ [Da]	ΔM [ppm]	First Scan	Last Scan	RT [min]	MSOrder	Ions Matched	Annotation
	AIEEEFGVTAAAPVAVAAADAADAGAAK	2	1	CID		300	6.23499	0	1	3	2557.28	1.30283	4469	4469	55.4465	MS2	42/108
	AIEEEFGVTAAAPVAVAAADAADAGAAK	2	1	CID		54.5704	4.6306	0	1	2	2557.28	2.35388	4574	4574	56.3014	MS2	24/54
	AIEEEFGVTAAAPVAVAAADAADAGAAK	2	1	CID		51.7054	4.48424	0	1	3	2557.28	-0.711327	8102	8102	87.0446	MS2	35/108
	AIEEEFGVTAAAPVAVAAADAADAGAAK	2	1	CID		66.2175	3.7721	0	1	3	2557.28	1.11973	7490	7490	80.6809	MS2	36/108
	AIEEEFGVTAAAPVAVAAADAADAGAAK	2	1	CID		125.039	3.57626	0	1	2	2557.28	2.59802	4939	4939	59.31	MS2	26/54
	AIEEEFGVTAAAPVAVAAADAADAGAAK	2	1	CID		44.7046	3.03846	0	1	2	2557.28	2.59802	4202	4202	53.2952	MS2	22/54
	AIEEEFGVTAAAPVAVAAADAADAGAAK	2	1	CID		84.7212	3.00754	0	1	3	2557.28	1.48594	8359	8359	90.0487	MS2	34/108
	AIEEEFGVTAAAPVAVAAADAADAGAAK	2	1	CID		33.9703	2.72534	0	1	2	2557.28	1.13317	5717	5717	65.659	MS2	16/54
	AIEEEFGVTAAAPVAVAAADAADAGAAK	2	1	CID		34.1563	2.58899	0	1	3	2557.28	5.14805	7820	7820	83.7507	MS2	27/108
	AIEEEFGVTAAAPVAVAAADAADAGAAK	2	1	CID		89.4955	2.45011	0	1	3	2557.28	1.30283	4837	4837	58.4574	MS2	26/108
	AIEEEFGVTAAAPVAVAAADAADAGAAK	2	1	CID		60.9743	2.38717	0	1	2	2557.28	1.62146	5311	5311	62.3328	MS2	15/54
	DSFDVELTSAGDKK	2	1	CID		31.656	2.03111	0	1	2	1511.72	2.18567	303	303	9.71472	MS2	13/26
	AIEEEFGVTAAAPVAVAAADAADAGAAK	2	1	CID		16.372	1.9988	0	1	2	2557.28	-0.0875294	8287	8287	88.8904	MS2	15/54
	AIEEEFGVTAAAPVAVAAADAADAGAAK	2	1	CID		24.8193	1.75707	0.129834	4	3	2557.28	2.21836	5202	5202	61.4652	MS2	20/108
	AIEEEFGVTAAAPVAVAAADAADAGAAK	2	1	CID		21.3471	1.60502	0	1	2	2557.28	-0.819951	6566	6566	72.3896	MS2	14/54
	DSFDVELTSAGDKK	2	1	CID		19.2107	0.886367	0	1	2	1511.72	1.45325	1604	1604	29.5632	MS2	7/26
gi15900026	7.82	16	857	45.9454	cell wall surface anchor family protein [Streptococcus pneumoniae TIGR4]
	Sequence	# Proteins	# Protein Groups	Activation Type	Modifications	Probability	XCorr	Δ Score	Rank	Charge	MH+ [Da]	ΔM [ppm]	First Scan	Last Scan	RT [min]	MSOrder	Ions Matched	Annotation
	EGDLSEKPGDTVLTQAKPEGVTGNTNSLPTPTER	11	1	CID		77.0108	5.0725	0	1	3	3538.75	0.28252	2305	2305	37.3905	MS2	39/132
[truncated: 1,526 more rows]

## Sheet: 5337-7F (1)
Accession #	Coverage	# Peptides	#AAs	Score	Description
[truncated: 86 more rows]

## Sheet: 5337-7F (2)
Accession #	Coverage	# Peptides	#AAs	Score	Description
[truncated: 2,009 more rows]

[truncated: 20 more sheets: 5341-1 (1), 5341-1 (2), 5341-1 (3), 5342-3 (1), 5342-3 (2), 5342-3 (3), 5343-14 (1), 5343-14 (2), 5343-14 (3), 5343-14 (4), 5343-14 (5), 5344-19A (1), 5344-19A (2), 5345-1 (1), 5345-1 (2), 5345-1 (3), 5345-1 (4), 5431-12F (1), 5431-12F (2), 5431-12F (3)]
