# Supplementary material for: Identification of Potential New Protein Vaccine Candidates through Pan-Surfomic Analysis of Pneumococcal Clinical Isolates from Adults
Source: PubMed Central journal article supplement (PMC3720901; doi:10.1371/journal.pone.0070365), 2013-07-23
Supplement: pone.0070365.s002.pdf [file pone.0070365.s002.pdf]

**Dataset S1: Recombinant fragments produced in this work from the selected gene products.** In gray are highlighted the sequences amplified (from the corresponding genes) and produced (from the corresponding proteins).

**spr0012. Cell division protein FtsH (EC:3.4.24.-)**

aa sequence: 652

MKKQNNGLIKNPFLWLLFIFFLVTGFQYFYSGNNSGGSQQINYTELVQEITDGNVKELTY  
QPNGSVIEVSGVYKNPKTSKEGTGIQFFTPSVTKVEKFTSTILPADTTVSELQKLATDHK  
AEVTVKHESSSGIWINLLVSI VPF GILFFFLFSMMGMGGNGRNPMSFGRSKAKAANKE  
DIKVRFSVDVAGAEEEKQELVEVVEFLKDPKRFTKLGARIPAGVLLLEGPPGTGKTLLAKAV  
AGEAGVPPFFSISGSDVFVEMFVGVGASRVRS LFEDAKKAAPAIIFIDEIDAVGRQRGVGLG  
GGNDEREQTLNQLLIEMDGFEGNEGIIVIAATNRSVDVLDPALLRPGRFDRKVLVGRPDVK  
GREAILKVHAKNKPLAEDVDLKLVAQQT PGFV GADLENVLNEAALVAARRNKSIIDASDI  
DEAEDRVIAGPSKKDKTVSQKERELVAYHEAGHTIVGLVLSNARVVHKVTIVPRGRAGGY  
MIALPKEDQMLLSKEDMKEQLAGLMGGRVAEEIIFNVQTTGASNDFEQATQMARAMVTEY  
GMSEKLGVPVQYEGNHAMLGAQSPQKSI SEQTAYEIDEEVRSLLNEARNKAAEIIQSNRET  
HKLIAEALLKYETLDSTQIKALYETGKMPEAVEEESHALS YDEVKSKMNDK

Nt sequence: 1959

atgaaaaacaaaataatggtttaattaaaaatccttttctatggttattatcttt  
ttccttgtgacaggattccagtatcttctatctggaataactcaggaggaagtcagcaa  
atcaactatactgagttggtacaagaaattaccgatggtaatgtaaaagaattaacttac  
caaccaaattggtagtgttatcgaagtttctggtgtctataaaaatcctaaaacaagtaaa  
gaaggaacaggtattcagtttttcacgccatctgttactaaggtagagaaatctaccagc  
actattcttctgcagatactaccgatcagaattgcaaaaacttgctactgaccataaa  
gcagaagtaactgtaagcatgaaagttcaagtggtatatggattaatctactcgtatcc  
attgtgccatttggaaattctattcttcttcttcttctctatgatgggaaatatgggagga  
ggcaatggccgtaatccaatgagtttggacgtagtaaggctaaagcagcaataaagaa  
gatattaaagtaagatcttcagatggtgctggagctgaggaagaaaaacaagaactagtt  
gaagttggtgagttcttaaaagatccaaaacgattcacaaaacttgagcccgtattcca  
gcaggtgttcttttgaggggacctccggggacaggtaagactttgcttgctaaggcagtc  
gctggagaagcaggtgttccattctttagtatctcaggttctgactttgtagaaatgttt  
gtcggagttggagctagtcgtgttcgctctctttttgaggatgccaaaaagcagcacca  
gctatcatctttatcgatgaaattgatgctgttggacgtcaacgtggagtcggtctcggc  
ggaggtaatgacgaacgtgaacaaacctgaaccaacttttgattgagatggatgggtttt  
gagggaaatgaagggattatcgtcatcgtcgcacaaaccgttcagatgacttgatcct  
gcccttttgcgtccaggacgttttgatagaaaagtattggttggccgtcctgatgttaaa  
ggtcgtgaagcaatcttgaaagttcacgctaagaacaagccttttagcagaagatggtgat  
ttgaaattagtggtcaacaaactccaggctttggttggtgctgatttagagaatgtcttg  
aatgaagcagctttagttgctgctcgtcgcataaatcgataattgatgcttcagatatt  
gatgaagcagaagatagagttattgctggaccttctaagaaagataagacagtttcacaa  
aaagaacgagaattggttgcttaccatgaggcaggacataaccattggttggtctagtcctg  
tcgaatgctcgcgttgccataaggttacaattgtaccacgcccgtgcaggcggatac  
atgattgcacttctaaagaggatcaaatgcttctatctaaagaagatatgaaagagcaa

ttggctggcctaataatgggtggacgtgtagctgaagaaattatctttaatgtccaaactaca  
 ggagcttcaaacgactttgaacaagcgacacaaatggcacgtgcaatggttacagagtac  
 ggtatgagtgaaaaacttggcccagtacaatatgaaggaaaccatgctatgcttgggtgca  
 cagagtcctcaaaaatcaatttcagaacaaacagcttatgaaattgatgaagaggttcgt  
 tcattattaaatgaggcacgaaataaagctgctgaaattattcagtc aaatcgtgaaact  
 cacaagttaattgcagaagcattattgaaatacgaaacattggatagtacacaaattaa  
 gctctttacgaaacaggaaagatgcttgaagcagtagaagaggaatctcatgcactatcc  
 tatgatgaagtaa **agtcaaaaatgaatgacgaaaaataa**

| Protein | Forward (5'→3')                                | Reverse (5'→3')                                      |
|---------|------------------------------------------------|------------------------------------------------------|
| spr0012 | TAAT GAT ATC GAA GTT GTT<br>GAG TTC TTA AAA GA | GCTGTA GCG GCC GCA TTT TTC<br>GTC ATT CAT TTT TGA CT |

1359 nt cloned

### spr0561. Cell wall-associated serine proteinase precursor PrtA (EC:3.4.21.-)

aa sequence: 2144

MKKSTVLSLTAAVILAAAYAPNEVVLADTSSSEDALSISDKEKVVVDKETENKEKHKDIIH  
 NAIETSKDTEEKKTTIIIEEKEVVSKNPVIDTKTSNEEAKIKEENSNQSQGDHTDSFVNKN  
 TENPKKEDKVVIYIAEFKDKESGEKAIKGLSNLKNTKVLYTYDRIFNGSAIETTPDNLDKI  
 KQIEGISSIERAQKVQPMNHRKEIGVEEAIDYLSKINAPFGKNFDGRGMVISNIDTGT  
 DYRHKAMRIDDDAKASMRFKKEDLKGTDKNYWLSDKI PHAFNYNGGKITVEKYDDGRDY  
 FDPHGMHIAGILAGNDTEQDIKNFNGIDGIAPNAQIFSYKMYSDAGSGFAGDETMFHAIE  
 DSIKHNVDVVS SVSSGFTGTGLVGEKYWQAIRALRKAGIPMVVATGNYATSASSSSWDLVA  
 NNHLKMTDTGNVTRTAAHEDAIAVASAKNQTFEFDKVNIGGESFKYRNIGAFFDKNKITT  
 NEDGTKAPSKLKFVYIGKGQDQDLIGLDLRGKIAVMDRIYTKDLKNAFKKAMDKGARAIM  
 VVNTVNYNRDNWTELPAMGYEADEGTKSQVFSISGDDGVKLWNMINPDKKTEVKRNNKE  
 DFKDKLEQYYPIDMESFNPNVNGDEKEIDFKFAPDTEKELYKEDIIVPAGSTSWGPRI  
 DLLLKPDVSAPGKNIKSTLNVINGKSTYGYMSGTSMATPIVAASTVLIRPKLKEMLERP  
 LKNLKGDDKIDLTSLTKIALQNTARPMMDATSWKEKSQYFASPRQQGAGLINVANALRNE  
 VVATFKNTDSKGLVNSYGSISLKEIKGDKKYFTIKLHNTSNRPLTFKVSASAITTDSLTD  
 RLKLDETYKDEKSPDGKQIVPEIHPEKVKGANITFEHGTFTIGANSSFDLNAVINVGEAK  
 NKNKFVESFIHFESVEEMEALNSNGKINFQPSLSMPLMGFAGNWNHEPILDKWAWEEGS  
 RSKTLGGYDDD GKPKIPGTLNKGIGGEHGIDKFNPAQVIQNRKDKNNTSLDQNPPELFAFN  
 NQGINAPSSSGSKIANIYPLDSNGNPQDAQLERGLTPSPLVLRSAEEGLISIVNTNKEGE  
 NQRDLKVISREHFIRGILNSKSNDAKGIKSSKLVWGLKWDGLIYNPRGREENAPESKD  
 NQDPATKIRGQFEPIAEGQYFYKFKYRLTKDYPWQVSYIPVKIDNTAPKIVSVDFSNPEK  
 IKLITKDTYHKVKDQYKNETLFARDQKEHPEKFEIANEVVYAGAALVNEDGEVEKNLEV  
 TYAGEGQGRNRKLDKDGNTIYEIKGAGDLRGKIEVIALDGSSNFTKIHRIFADQADEK  
 GMISYLVDPDKASKYEKLGEISEDKLNKAKSPEENTNNNQAKDEDSKPDEKSSVEGEA  
 SLEINKTISTIREFENKDLKLIKFKFREVNDFTSETGKRIEYDYKYDDKGNIIAYDDG  
 SALQYETEFKFEIKSKIYGVLSPSKDGHFELGKISNVSKNAKVYYGNSYKSIEIKATKY  
 DSHSKTMIFDLYANINDIVIDGLAFAGDMRLFVKDDNQIKAETKIRMPEKNKETKAEYPYV  
 SSYGNVIELGEGDLSKNKPDNLTKMESGKIYS DSEKQQYLLKDNIILRKGALKVTTYNP  
 GKTDMLEGNVYSKEDIAKIQKANPNLRVLSETTIYADSRNVEDGRSTQAVLMSALDGFN  
 IIRYQVFTFKMNDKGEAIDKDGNLVTDSSKLVLF GKDDKEYTGEDKSNVEAIKEDGSMFL  
 IDTKPVNLSMDKNYFNPSKSNKIYVRNPEFYLRGKISDKGGFNWELRVNESVVDNYLIYG  
 DLHIDNTRDFNIKLVKDG DIMDWGMKDYKANGFPDKVTDMDGNVYLQGTGYSDLNAKAVG  
 VHYQFLYDNVKPEVNIDPKGNTSIEYADGKSVVFNINDKRNGFDGEIQEQHIYVNGKEY  
 TSFDDIKQITDKTLNIKIVVKDFARNTTVKEFILNKDTGEVSELKPHRVTVTIQNGKEMS  
 STIVSEEDFILPVYKGELEKGYQFDGWEISGFEGKKDAGYVINLSKDTFIKPVFKKIEEK

KEEENKPTFDVSKKKDNPQVNHSQNLNESHKEDLQREDHSQKSDSTKDVATVLDKNNIS  
SKSTTNNPNKLPKTGTASGAQTLAAGIMFIVGIFLGLKKNQD

Nt sequence: 6435

atgaaaaaaagcacagtattgtcactaactacagctgcagttatTTTTagcagcctatgcc  
cctaatagaggtagtcttagca**gacacatctagctctgaagat**gctttaagcatctctgat  
aaagaaaaagtagtagtagataaggaaacagaaaaataaagagaaacataaagatattcat  
aatgctatagaaaacttcaaaggatactgaagaaaagaaaacaacaattattgaggaaaaa  
gaagttgtagtaaaaaatcctgtaatagacactaaaactagcaatgaagaagcaaaaatc  
aaagaagaaaattccaatcaatcccaaggagatcatacggactcatttTgtgaataaaaaac  
acagaaaatcccaaaaaagaagataaaagtTgtctatattgctgaatttaagataaaagaa  
tctggagaaaaagcaatcaagggactatcaaactctaagaatacaaaagTTTTatatact  
tatgatagaattTTTaaacggtagtgccatagaacaactccagataactTggacaaaatt  
aaacaaatagaaggattttcatcgattgaaagggcacaaaagtccaacccatgatgaat  
catgccagaaaggaattggagttgaggaagctattgattacctaagTctatcaatgct  
cggTTTTgggaaaaattTtgatggttagaggtatggTcatttcaaatatcgatactggaaca  
gattatagacataaggctatgagaatcgatgatgatgccaagcctcaatgagattTaaa  
aaagaagactTaaaaggaactgataaaaaattTggTtgagtgataaaaatccctcatgcg  
ttcaattattataatggTggcaaaatcactgtagaaaaatTgatgatggaagggattat  
TTTgaccacatgggatgcatattgcagggattctTgctggaaatgatactgacaagat  
atcaaaaactTTaaacggcatagatggaattgcacctaatgcacaaattTctctTtaaaa  
atgtattctgacgcaggatctgggtTgCGGTgatgaaacaatgtTtcatgctattgaa  
gattctatcaaacacaacgtTgatgtTtTcggtatcatctggTTTTacaggaacaggt  
ctTgtaggt**gagaaatattggcaagctattc**gggcattaagaaaagcaggcattccaatg  
gtTgtcgctacgggtaactatgCGacttctgctTcaagTctTcatgggatttagtagca  
aataatcatctgaaaatgaccgacactggaaatgtaacacgaactgcagcacatgaggat  
gCGatagcggTcgctTctgctaaaaatcaaacagTtgagTtgataaagTtaacataggt  
ggagaaagTTTTaaatacagaaatataggggcTTTTctgataagaataaaaatcacaaca  
aatgaagatggaacaaaagctcctagTaaattaaaattTgtatataataggcaaggggcaa  
gaccaagattTgataggtTtgatcttaggggcaaaattgcagTaatggatagaattTat  
acaaggtTtaaaaaatgctTTTaaaaaagctatggataagggTgcacgcgccattatg  
gtTgTaaatactgTaaattactacaatagagataattTggacagagctTccagctatggga  
tatgaagcggatgaaggtactaaaagTcaagTgtTTTcaattTcaggagatgatggTgta  
aagctatggaacatgattaatcctgataaaaaaactgaagTcaaaagaaataataaagaa  
gattTTaaagataaattTggagcaatactatccaattgatatggaaagTTTTaattccaac  
aaaccgaatgtaggtgacgaaaaagagattgactTTaagTTTgcacctgacacagacaaa  
gaactctataaagaagatatcatcgTtccagcaggatccacatctTgggggccaagaata  
gattTactTTTaaaaccgatgtTtccagcacctggTaaaaatattaaatctacgcttaat  
gttattaatggcaaatcaacttatggctatTgtcaggaactagTatggcactccaatc  
gtggcagctTctactgtTTTgattagaccgaaattaaaggaatgctTgaaagacctgta  
ttgaaaaatctTaaaggagatgacaaaatagatctTacaagTctTcaaaaaattgCccta  
caaaatactgctcgacctatgatggatgcaactTctTggaaagaaaaaagTcaatactTt  
gcatcacctagacaacagggagcaggcctaattaatgtggccaatgctTtgagaaatgaa  
gtTgtagcaactTTcaaaaactgattctaaaggtTtgTaaactcatatggTtccatt  
tctctTaaagaaataaaaggtgataaaaaatactTTTacaatcaagctTcaatacatca  
aacagacctTtgactTTTaaagTTTcagcatcagcgataactacagattctTtaactgac  
agattaaaactTgatgaaacatataaagatgaaaaatctccagatggTaaagcaaatgtT  
ccagaaattcaccagaaaaagTcaaaggagcaaatatcacattTgagcatggTactTtC  
actataggcgcaaatTctagctTtgattTgaaTgCGgtataaaatgtTggagaggccaaa  
aacaataaaatTgtagaatcattTattcattTtgagTcagTggaagaaatggaaagct  
ctaaactccaacgggaagaaataaaactTccaactTctTgtcgatgctTcaatggga  
ttTgctgggaattTggaaccacgaaccaatcctTgataaatgggctTgggaagaagggTca  
agatcaaaaacactgggaggttatgatgatgatggTaaaccgaaaattccaggaacctta  
aataagggaaatTgTgggagaacatggTatagataaaattTaatccagcaggagTtatacaa  
aatagaaaagataaaaaatacaacatccctggatcaaaaatccagaattattTgctTtcaat  
aaccaagggatcaacgctccatcatcaagTggtTctaagattgctaacattTatcctTta

gattcaa atggaa atcctca agatgctca acttgaa agaggatta acaccttctccactt  
gtatta agaagtg cagaaga aggattg atttca atagtaa atacaa ataa agaggagaa  
aatcaa agagact taaa agtcatttc gagagaa cacttt attag aggaattt taaattct  
aaaag caatgat gcaa aggga atcaa atcatc taaactaaa agtttg ggggtg acttga ag  
tgggat ggactcat ctata atcctag aggtag agaa gaaa atgc accagaa agta aggat  
aatca agatcct gctacta agata agaggt caattt gaaccg attg cga aggtca atat  
ttctata aattt aaatat agatta actaa agattac ccattggc aggtttc ctatattc ct  
gtaaaa attgata acaccgccc taagattg tttcggttg attttt caaatcctg aaaaa  
atta agttg attaca aaggata ctctat cata aggtaaa agatc agtata agaatgaa acg  
ctattt gcgag agatcaaaa agaacatcctg aaaa atttg acgag attg cga acgaa gtt  
tggatg ctggc gctctt gttaat gaagat ggag aggtg aaaaaa atctt gaagta  
acttac gcaggtg aggggt caagga agaa atagaaa acttg acaa agacg gaa atacc att  
tatgaa attaa aggtgc aggag attta agagg aaaa atcatt gaagtc attgc attagat  
ggttct agca atttc acaa agattc ataga attaa atttg ctgatc aggtgat gaaa ag  
gggatg atttctt attac ctatg atgcctg acaa agatgctt ctaa atatg aaaa actt  
ggtgaa atttct gaagata aactcaaaa atgcaa agagccc agagg aaaa atacca ataat  
aatca agcta aggat gaagatt caaaa ccagatg aaaaa agttc agttg agggg aga agct  
agcctt gaaata aataaaa actattt caaca attag agagttt gaaaa taagac ctaa ag  
aaactc attaaa agaa atttag agaa gttaat gatttt caagtg aaa actgg taagaga  
atag agga atacg attata aatac gatgata aggg aaaa atattt gcttat gacgat ggt  
agtgcctt caaatat gaaactg aaaa atttg acgaa ataaa atcaaaa atttat ggtggt  
ctaagccc atcta agatgg acactttt gaaattctt ggaa agata agca atgtttctaaa  
aatgcca aggtatattat ggaa atagctata aatcg atagaa atcaa agcg acta agtat  
gattcac attcaaaa acgatgat atttg atttata cgc taatatta atgatattg tagat  
ggattag cttttg ctgg agatag tagattattt gttaa agatg acaatca aataaaa agct  
gaaacta agattaga atgcctg aaaaaa ataa aggaa actaa agcaga atatcc ctatgta  
tcaagttat gggaa atgta atcga attagg agag aggtatctt caaaga acaaac cagac  
aattta actaaa atgga atctggtaaa atctattctg attcag aaaa acaaca atatctg  
ttaa aggata acatcatt ctaagaaa aggtatgc actaaa agtgactac ctata atcct  
ggaaaa acggatag tttaga aggaa atggag tctatag caagga agatag caaaaa ta  
caaa aggccaatc cta atcta agagtcctttc agaa acaaca atttatg ctgatag taga  
aatgtt gaagatg gaaga agtacc caagctgt attaatgtc ggtttt ggacgg ctttaac  
attata aggtatca agtgttac atttaaa atga acgata aagggg aagctatcg ataaa  
gacggaa atcttgtg acagattcttctaaa acttg tattattt ggta aggatgata aagaa  
tacttg gagagg ataa gttcca atgtaga agctataaaa agaatgg ctccatgttattt  
attgata ccaa accagtaaacctt caatgg ataa gaactactt taatcc atctaa atct  
aataaaa tttatg tacgaa atccaga attttattt aagagg taagatttctg ataa ggt  
ggtttta actgg aattg agagttaat gaatc ggttg tagata attattt aatctac gga  
gatttac acattgata acactag agattt taatatta agctga atgtta aagac ggtgac  
atcatg gactgg gaa atgaa agactata aagcaaac ggtttcc agata aggtaac agat  
atggatg gaa atg tttatctt caaactg gctatagc gatttga atgcta aagc agttgga  
gtccactatc agttttt atagata atgttaaacct gaagtaaac attgatc ctaaggg a  
aatactag tatcga atatgctgat gggaaa atctgtag tctt taacatca atgataaaa ga  
aataatgg attcgatgg tgagatt caaga acaacatattt atgtaa atggaaa ga atat  
acatcattt gatgat attaa caaata acagaca agacactaa acatta agattg ttgta  
aaagatttt gcaagaa ataca accgtaaa agaatc attttta aataa agatac gggg agag  
gta agtgaa ataaa cctcat agggta actgtg accattcaaaa tggaaa agaatg agt  
tcaacgat agtgtc ggaaga agattttattttac ctgtttata aggggtga attag aaaaa  
ggatacca atttgat ggttgg gaa atttctg gtttc gaaggta aaaaa agacgctgg ctat  
gttatta atctat caaa agatac ttttataaaa cctgtatt caagaaa atag aggg agaaa  
aagg agga agaga ataa accctactttt gatgtatc gaaaa agaa agata acccaca agta  
aatcat agtca attaa atgaa agtcac agaaa agagg atttaca aagaga agatcattca  
caaaa atctgatt caacta aggatgttac agctac agttcttg ataaa acaaatatc agt  
agtaaat caactacta acaatc ctaata agttg ccaaaa actgga acagca agcgg agcc  
cagacact attagctg ccgga ataatgtttat agtagga attttctt ggattgaa gaaa  
aaaa atca agattaa

| Protein | Forward (5'→3')                             | Reverse (5'→3')                                   |
|---------|---------------------------------------------|---------------------------------------------------|
| spr0561 | ATAT TCG CGA GAC ACA TCT<br>AGC TCT GAA GAT | GATGAT GCG GCC GCG AAT AGC<br>TTG CCA ATA TTT CTC |

1090 nt cloned

### spr0121. surface protein *pspA* precursor

aa sequence: 619

MNKKKMILTSLASVAILGAGFVASQPTVVRAEESPVASQSKAEKDYDAAKKDAKNAKKAV  
EDAQKALDDAKAAQKKYDEDQKKTEEKAALKAASEEMDKAVAAVQQAYLAYQQATDKAA  
KDAADKMIDEAKKREEEAKTKFNTVRAMVVPEPEQLAETKKKSEEAKQKAPELTKKLEEA  
KAKLEEAEEKKATEAKQKVDAAEEVAPQAKIAELENQVHRLEQELKEIDESESEDYAKEGFR  
APLQSKLDAKKAKLSKLEELSDKIDELDAEIAKLEDQLKAAEENNNVEDYFKEGLEKTIA  
AKKAELEKTEADLKKAVNEPEKPAPAPETPAPEAPAEQPKPAPAPQPAPAPKPEKPAEQP  
KPEKTDQQAEEEDYARRSEEEYNRLTQQQPKAIEKPAPAPKTGWKQENGMWYFYNTDGS  
M  
ATGWLQNNGSWYYLNSNGAMATGWLQYNGSWYYLNANGAMATGWAKVNGSWYYLNANGAM  
ATGWLQYNGSWYYLNANGAMATGWAKVNGSWYYLNANGAMATGWLQYNGSWYYLNANGAM  
ATGWAKVNGSWYYLNANGAMATGWVKDGDWYYLEASGAMKASQWFKVSDKWYYVNLGLG  
LAVNTTVDGYKVNANGEWV

Nt sequence: 1860

atgaataagaaaaaatgattttaacaagtctagccagcgtcgctatcttaggggctggt  
tttggtgcgtctcagcctactggtgtaagagcagaagaatctcccgtagccagtcagtct  
aaagctgagaaagactatgatgcagcgaagaagatgctaagaatgcaaaaaagcagta  
gaagatgctcaaaaggcttagatgatgcaaaagctgctcagaaaaatgatgacgaggat  
cagaagaaaactgaggagaaagccgctagaaaaagcagcgtctgaagagatggataag  
gca<sup>gtggcagcagttcaacaagcg</sup>tatctagcctatcaacaagctacagacaaagccgca  
aaagacgcagcagataagatgatagatgaagctaagaaacgcgaagaagaggcaaaaact  
aaatthaataactggttcgagcaatggttagttcctgagccagagcagttggctgagactaag  
aaaaatcagaagaagctaaacaaaaagcaccagaacttactaaaaaactagaagaagct  
aaagcaaaattagaagaggctgagaaaaagctactgaagccaaacaaaaagtggatgct  
gaagaagtcgctcctcaagctaaaatcgctgaattggaaaatcaagttcatagactagaa  
caagagctcaaagagattgatgagctcgaatcagaagattatgctaaagaaggtttccgt  
gctcctcttcaatctaaattggatgccaaaaagctaaactatcaaaacttgaagagtta  
agtataagattgatgagtttagacgctgaaattgcaaaacttgaagatcaacttaaagct  
gctgaagaaaacaataatgtagaagactactttaagaaggttttagagaaaactattgct  
gctaaaaaagctgaattagaaaaaactgaagctgaccttaagaaagcagttaatgagcca  
gaaaaaccagctccagctccagaaactccagccccagaagcaccagctgaacaacccaaa  
ccagcgcggctcctcaaccagctcccgcacccaaaaccagagaagccagctgaacaacca  
aaaccagaaaaaacagatgatcaacaagctgaagaagactatgctcgtagatcagaagaa  
gaatataatcgcttgactcaacagcaaccgccaagctgaaaaaccagctcctgcacca  
aaaacaggctggaacaagaaaacgggtatgtggtacttctacaatactgatggttcaatg  
gcgacaggatggctccaaaacaacgggtcatggtactacctcaacagcaatgggtgctatg  
gctacagggttggtccaatacaatgggtcatggtattacctcaacgctaacgggtgctatg  
gcaacagggttgggctaaagtcaacgggtcatggtactacctcaacgctaactgggtgctatg  
gctacagggttggctccaatacaacgggtcatggtattacctcaacgctaacgggctatg  
gcaacagggttgggctaaagtcaacgggtcatggtactacctcaacgctaactgggtgctatg  
gctacagggttgggctccaatacaacgggtcatggtactacctcaacgctaactgggtgctatg  
gcaacagggttgggctaaagtcaacgggtcatggtactacctcaacgctaactgggtgctatg  
gcaacagggttgggctaaagtcaacgggtcatggtactacctcaacgctaactgggtgctatg  
aaagcaagccaatgggtcaaagtatcagataaatgggtactatgtcaatgggttaggtgcc  
cctgtagtcaacacaactgtagatggctataaagtc<sup>aatgccaatggtgaatgggttaa</sup>

| Protein | Forward (5'→3')                             | Reverse (5'→3')                                     |
|---------|---------------------------------------------|-----------------------------------------------------|
| spr0121 | TAGA GAT ATC GTG GCA GCA<br>GTT CAA CAA GCG | GATACA GCG GCC GCA AAC CCA<br>TTC ACC ATT CGC ATT G |

1557 nt cloned

### spr0328. Cell wall surface anchor family protein

aa sequence: 1767

MNKGLFEKRCKYSIRKFSLSGVASVMIGATFFGTSPVLADSVQSGSTANLPADLATALATA  
 KENDGHDFEAPKVGEDQGSPEVTDGPKTEEELLALEKEKPAEEKPKEDKPAAAKPETPKT  
 VTPewQTVekkeQQGTVTIREEKGVRYNQLSSTAQNNDNAGKPALFEKKGLTVDANGNATV  
 DLTFKDDSEKGSRFGVFLFKDTKNNVFGYDKDGFWEYKSPTTSTWYRGSRVAAAPET  
 GSTNRLSITLKS DGQLNASNNDVNLFDVTLPAAVNDHLKNEKKILLKAGSYDDERTVVS  
 VKTDNQEGVKTEDTPAEKETGPEVDDSKVTYDTIQSKVLKAVIDQAFPRVKEYSLNGHTL  
 PGQVQQFNQVFINNHRITPEVTYKKINETTAEYLMKLRDDAHLINAEMTVRLQVVDNQLH  
 FDVTKIVNHNQVTPGQKIDDERKLLSSISFLGNALVSVSSDQTGAKFDGATMSNNTHVSG  
 DDHIDVTNPMKDLAKGYMYGFVSTDKLAAGVWSNSQNSYGGGSNDWTRLTAYKETVGNAN  
 YVGIHSSewQWEKAYKGI VFP EYTKELPSAKVVITEDANADKKVDWQDGAIA YRSIMN NP  
 QGWKVKDITAYRIAMNFGSQAQNPFLMTLDGIKKINLHTDGLGQGVLLKGYGSEGHDSG  
 HLN YADIGKRIGGVEDFKTLIEKAKKYGAHLGIHVNASETYPESKYFNEKILRKNPDGSY  
 SYGWNWLDQGINIDAAYDLAHGRLARWEDLKKKLG DGLDFIYVDVWNGQSGDNGAWATH  
 VLAKEINKQGWRF AIEWGHGGEYDSTFHHWAADLT YGGYTNKGINSAITR FIRNHQKDAW  
 VGDYRSYGGAAANYPLLGGYSMKDFEGWQGRSDYNGYVTNLFAHDVMTKYFQHFTVSKWEN  
 GTPVTMTDNGSTYKWTPEMRVELVDADNNKVVVTRKSN DVNSPQYRERTVTLNGRVIQDG  
 SAYLTPWNWDANGKKLSTDK EKMYFNTQAGATTWTLPSDWAKSKVYLYKLTDQ GKTEEQ  
 ELTVKDGKITL DLLANQP YVLYRSKQTNPEMSWSEG MHIYDQGFNSGTLKHW TISGDASK  
 AEIVKSQGANM LRIQGNKEK VSLTQKLTGLKPN TKYAVYVGV DNRSNAKASITVNTG EK  
 EVTTYTNKSLALNYVKAYAHNTRRN NATVDDTSYFQNM YAFFTTGSDVSNVTLTLSREAG  
 DEATYFDEIRTFENSSMYGDKHDTGKGT FKFQDFENVAQGI FPFVVG GVEGVEDNRTHLS  
 EKHPYTORGWNGK KVDVIEGNWSLKTNGLVSRRLVYQTI PQNFRFEAGKTYRVTFEY  
 EAGSDNTYAFVVGKGEFQSGRRGTQASNLEMHEL PNTWTDSKKAKKATFLVTGAETGDTW  
 VGIYSTGNASNTRGDSGGNANFRGYNDFMMDNLQIEEITLTGKMLTENALKNYLPTVAMT  
 NYTKESMDALKEAVFNLSQADDDISVEEARAEIAKIEALKNALVQKKTALVADDFASLTA  
 PAQAQEGLANAFDGNLSSLWHTSWGGGDV GKPATMVLKEATEITGLRYVPRGSGSNGNLR  
 DVKLVVTDESGKEHTFTATDWPDNNKPKDIDFGKTIKAKKIVLTGT KTYGDGGDKYQSAA  
 ELIFTRPQVAETPLDLSGYEAALAKAQKLT DKNQEEVASVQASMKYATDNHLLTERMVE  
 YFADYLNQLKDSATKPDAPTVEKPEFKLSSVASDQ GKTPDYKQEIARPETPEQILPATGE  
 SQFD TALFLASVSLALSALFVVKTKD

Nt sequence: 5304

atgaataaaggattatttgaaaaacggttgtaaataatagtagtattcggaaatcttcattaggt  
 gttgcttctggtatgattggagctacattccttgggacaagtccgggtccttgcatagc  
 gtgcagctctggttccacggcgaacttaccagctgatttagctactgctccttgcaacagca  
 aaagagaatgatgggcatgattttgaagcgcctaaggtgggagaagaccaagggttctcca  
 gaagttacagatggacctaagacagaagaagaactattagcacttgaaaaagaaaaaccg  
 gctgaagaaaaacccaaaagaggataaacctgcagctgctaaacctgaaacacctaagacg  
 gtaaccctgaaatggcaaacggtagagaaaaaagaacaacagggaaacagtcactatccga  
 gaagaaaaagggtgtccgctacaaccaattatcctcaactgctcaaaatgataacgcaggt  
 aaaccagccctgtttgaaaagaagggttgaccggttgatgccaatggaaatgcaactggt  
 gatttaaccttcaaagatgattctgaaaagggcaaatcacgcttgggtgtcttcttgaaa  
 tttaaagataccaagaataatgtttttgtcggttacgacaaggatggctggttctgggag  
 tataaatctccaacaactagcacttggatagaggtagtcgtggtgctgctcctgaaaca  
 ggatcaacaaaccgtctctctatcactctcaagtcagacggtcagctaaatgccagcaat

aacgatgtcaatctctttgacacagtgactctaccagctgcggtcaatgaccatcttaaa  
aatgagaagaagattcttctcaaggcgggctcttatgacgatgagcgaacagttgttagc  
gttaaaacggataaccaagaggggtaaaaaacagaggatacccctgctgaaaaagaaaca  
ggctctgaagttgatgatagcaaggtgacttatgacacgattcagttcaaggttctcaa  
gcagtgattgaccaagccttccctcgtgtcaaggaatacagcttgaatggacatactttg  
ccaggacaggttcaaca**gttcaaccaagtctttatcaata**accaccgaatcaccctgaa  
gtcacttataagaaaatcaatgagacaacagcagagtacttgatgaagcttcgogatgat  
gctcacttaatcaatgcggaaatgacagtagccttgcaagttgtggacaatcaattgcac  
tttgatgtgaccaagattgtcaaccacaatcaagtcactccaggtcaaaagattgatgac  
gaaagaaaactactttcttctattagtttctcgcgcaatgctttagtctctgtttctagt  
gatcaaaactggtgctaagttgatggggcaacatgtcaaacaatacgcagtcagcggga  
gatgatcatalcagatgtaaccaatccaatgaaagatctagccaagggttacatgtatgga  
ttgtttctacagataagccttgctgctgggtgttgaggtaactctcaaaacagctatggt  
ggtggttcgaatgactggactcgtttgacagcctataaagaacagtcggaaatgccaac  
tatgtaggaatccacagctctgaatggcaatgggaaaaagcttataagggcattgtttc  
ccagaatacacgaaggaactccaagtgctaaggttggtatcactgaagatgccaatgca  
gacaagaaagtcgattggcaggatgggtgccattgcttatcgtagcattatgaacaatcct  
caaggttggaaaaaagtttaaggatatcacagcttaccgtatcgcgatgaactttggttct  
caagcacaaaaccatttcttatgaccttggtatcaagaaaatcaatctccacaca  
gatggtcttgggcaaggtgttctccttaaaggatatggtagcgaaggccatgactctggt  
cacttgaactatgctgatattggttaagcgtatcgggtggtgctgaagacttcaagacccta  
attgagaaggctaagaaaataggagctcatctaggtatccacgttaacgcttcagaaact  
tatcctgagttcaataacttcaatgaaaaaatttctccgtaagaatccagatggaagctat  
agctatgggttggaaactggctagatcaaggtatcaacattgatgctgcctatgacctagct  
catgggtcgtttggcacggttgggaagatttgaagaaaaaacttgggtgacgggtctcgacttt  
atctatgtggacggtttgggtaatgggtcaatcaggtgataacgggtgcctgggctaccac  
gttcttgctaaagaaattaacaacaaggctggcgttttgcgatcagagtggggccaatggt  
ggtgagtagcactctaccttccatcactgggcagctgacttgacctacgggtggctacacc  
aataaaggtatcaacagtgccatcaccgctttatacgttaaccacaaaagatgcttgg  
gtaggggactacagaagttatggtggtgacgccaactatccactgctaggtggctacagc  
atgaaagactttgaaggctggcaaggaagaagtgactacaatggctatgtaactaactta  
tttgcccatgacgtcatgaccaagtaacttccaacacttactgtaagtaaatgggaaaat  
ggtacaccggtgactatgaccgataacggtagcacctataaatggactccagaaatgcga  
gtggaattggttagatgctgacaataataaagtagttgtaactcgttaagtcaaatgatgct  
aatagttccacaatatcgcgaacgtacagtaactctcaacggacgtgtcatccaagatggt  
tcagcttacttgactccttggaaactgggatgcaaatggtaagaaactttctactgataag  
gaaaagatgtactacttcaatacgcaggccggtgcaacaacttggacccttccaagcgat  
tgggcaaagagcaaggtttacctttacaagtaactgaccaaggtaagacagaagagcaa  
gaactaactgtaaaagatggtaaaattaccctagatcttctagcaaatcaaccatacgtt  
ctctatcgttcgaaacaaaccaatcctgaaatgtcatggagtgaaggcatgcacatctat  
gaccaaggatttaacagtggtaccttgaacattggaccatttcaggcgatgcttctaag  
gcagaaattgtcaagttcaaggggcaacgatatgcttcgtattcaaggaacaaagaa  
aaagttagttcactcagaaattaactggcttgaaccaaataccaagatgcccgtttat  
gtcgggtgctgataaccgtagtaatgccaaaggcagcatcactgtaataactgggtgaaaa  
gaagtgactacttataccaataagttctctcgcctcaactatgtaaaagcctatgcccac  
aatacacgctcgtacaatgctacagttgacgatacaagttacttccaaaacatgtacgcc  
ttctttacaactggatcggacgtatcaaatgttactctgacattgagtcgtgaagctggt  
gatgaagcaacttactttgatgaaattcgtacctttgaaaacaattcaagcatgtacgga  
gacaagcatgatacaggtaaaggcaccttcaagcaagactttgaaaatggtgctcagggt  
atcttcccattttagtggtggtgctgaaggtgctgaagacaaccgactcacttgtct  
gaaaaacacgatccatatacacaacgtgggtggaatggtaagaaagtcgatgatggtatc  
gaaggaaattggtcactcaagacaaatggactagtgagccgtcgttaacttggtttaccaa  
actattccgcaaaacttccgttttgaagcaggttaagacctaccgtgtaacctttgaatac  
gaagcaggttcagacaatacctatgctttttagtgcgtaagggagaattccagtcaggt  
cgtcgtgggtactcaagcaagcaacttggaaatgcatgaattgccaaatacttggacagat  
tctaagaaagccaagaaggcaacttctcgtgacaggtgcagaaacaggggatacttgg

gtaggtatctactcaactggaatgcaagtaatactcgtggtgattctggtggaaatgcc  
aacttccgtggttataacgacttcatgatggataatcttcaaatcgaagaattacccta  
acaggaagatggtgacagaaaatgctctgaagaactacttgccaacggttgccatgact  
aactacaccaagagtctatggatgctttgaaagaggcggctctttaacctcagtcaggcc  
gatgatgatatcagtggtggaagaagcgcgtgcagagattgccaagattgaagccttgaag  
aatgctttggttcagaagaaaacggctttggtagcagatgactttgcaagtcttacagct  
cctgctcaggctcaagaaggtcttgcaaatgcctttgatggaaacttatctagtttatgg  
catacatcatggggcgaggagatgtaggcaagcctgcaacctgggtcttgaaagaagca  
actgaaatcactggacttcggttatggtccacgtggatcagggttcaaattggttaacttgcgt  
gatgtgaaacttgttgacagatgagctggcaaggagcatacctttactgcaactgat  
tggccagataacaataagccaaaagacattgattttggtaagacaattaaggctaagaaa  
attgctcttacaggtactaagacttacggagatgggtggcgataaataccaatctgcagcg  
gaactcatctttactcgtccacaggtagcagaaacacctcttgacttgtcaggctatgaa  
gcagctttggctaaggctcagaaattaacagacaaagacaatcaagaggaagtagctagc  
gttcaggcaagcatgaaatatgcgacggataacctctcttgacggaaagaatgggtggaa  
tactttgcagattatctcaaccaattaaaagattctgctacgaaaccagatgctccaact  
gtagagaaacctgagtttaacttagctctgtagcttccgatcaaggtaagacgccagat  
tataagcaagaaatagctagaccagaaacacctgaacaaatcttgccagcaacagggtgag  
agtcaatttgacacagccctcttcctagcaagtggttagcctagccctatctgctctctt  
gtagtaaaaacgaagaaagactag

| Protein | Forward (5'→3')                           | Reverse (5'→3')                                     |
|---------|-------------------------------------------|-----------------------------------------------------|
| spr0328 | TTTA GAT ATC AGC GTG CAG<br>TCT GGT TCC A | GATGAT GCG GCC GCT ATT GAT<br>AAA GAC TTG GTT GAA C |

1003 nt cloned

**sp670\_2141. TMP repeat family**

aa sequence: 1217

MATLDELKVMIDAEIAPFRKKMKEVENQVKGTSQVKNATAKVREQSSSIGSAFGKLAKF  
AGFAILGKLLLDVGMYSTQTALEVSAAMNQIKRQMGESSQSFLKWVNDNANAMNMGVGEA  
TNYGAVYSNLFSGFIKDTNKLSAYTAKMLQTSAVVAEGSGRTITDVMERIRSGLLGNTEA  
IEDLGINVNVAMIESTEAFKKFANGQSWQQLDYQTQQQIRLMAILEQATAKYGDTLNSNV  
NGRISLFSKSLMKDAALNLGNSMLPIINAIMPVLSNFAMVLKNVTAKLAEFIALMFNKKAT  
VKDGVGGAVGDMGNAMKDAAGGAGDLADAVDDAGDSAGGLADNLGDSAKNAKKAKELLG  
LLGFDEINILQPKDDDDAGSGGGGKGGKGGGGGPFKDILPEVELTDMDNKFKSIFDG  
LGDKLGLFDLFFKGFDAAFRPEGIKRIKTALDQIAKTMGEIATDPRVVFNAFNRMAEKIA  
YALGQVTGSITITIGLGIGVFLAESIANGLGRQKERIIRALVALFDNVGNLSEAVGNIAQD  
FSSAFYDVTITSTGAVRIGSAIVSTLLSLTSTIVEVGSKLAGSLFKGFQVVTTSAPKISS  
VFQSLLDTVAPVFESIERSVNKFGDGLSRVYDEHVVPAINSIANAFNGLIDI IQILWENS  
WQPFAEFLSGVFGVSIEGISDLLGGLLATLGLLADAIKLVADGFTVFSWCKENKEPIL  
ALITTWQ TINFLSWAEQAGGLAGAFSLGSKVSLIVGGIKNLGLAIKALTFDKLVSFGET  
IYLNTRYAKDFVNSGKTIAQLGKTALELGKSALAWTAHAAKMGLATAAEFAHSVAAGVA  
TAATWAFNAALAVLTSPITWIIAIIAALIAIGVLLYQNWDTVVEFAKTAWQGLCDFISGI  
CRAIGEFFSGLWTKLQEIFEPIGQWFGKFKQAWDAIVNIFSGIGEWFSGVFQAWDAIV  
NIFTPIGSWFGQRWADVTSALANIGAWFTDIFQAWTGLTNIFSKLGLWFGGERWADVTSV  
LANVSSWFGNMFSAVNAVKNAFSSIGGFFSGVWSTVQSIFVNAGQKVGSAVGGAFKSAV  
NAVLGTIENVVNGFIGMINGVLGVVRNLPGLGWVGSVSTVSLPRLARGGIVDSPTIAMIG  
EAGKEAVVPLENTGFIQTLGRVSSAVVNAMAGISPQGGFSSDGDIVIQIAGHEFGRVAI  
QEINKEHERAGQTLTKI



Nt sequence: 3654

Atg**gcaactcttgatgaattgaaag**tcatgattgacgctgagatagcgcctttcaggaag  
aagatgaaagaagtcgagaatcaggtcaaaggaacatctgaccaagtgaaaaatgctact  
gccaaagttcgtgaacagtcgagctcaatcggtagtgcgtttgcaagctggctaagtct  
gctggttttgcaatccttggttaagaaattacttgatggtgggatgtattcaacgcagacg  
gctcttgaagtatcagcgtctatgaaccaaatacaagcgacagatgggcgagagttcgcaa  
tctttcttaaaatgggttaacgataatgccaacgctatgaatatgggtgtgggtgaggct  
accaactacggtgcagtcactcaaacttattttctggatttatcaaagataccaacaag  
ctaagcgcctataccgctaagatggtgcagacatcggcagttggtgctgaaggttcaggg  
cgcacgattacagacggttatggagcggattcgcctcaggttactagggaaacaccgaagcg  
attgaggacctaggaatcaacgtcaacgtggctatgattgagtcactgaagcctttaag  
aagttcgcaaacggacagagctggcaacagttggattaccaaacccagcaacaaatccgc  
cttatggctattctggaacaggctacagccaagtatggggataccttgcctaattctgta  
aatggctcgtatcagcctatttaagtcgctgatgaaggacgcagcattgaacctggtaac  
tctatgttaccgattatcaatgccattatgcctgtcttgaactcttttgctatggctta  
aagaacgttactgctaaactcgcctgagttatcgccttgatggttcaacaagaaagcaaca  
gtgaaagatgggtgttggtggagcagttggagacatgggtaacgccatgaaggatgctgca  
ggcggagcaggagaccttgctgacgcagtagacgacgctggagattcagcaggaggactt  
gctgataatccttgagactcagccaaaaacgctaagaaagctgctaagagattgctaggt  
**cttttgggatttgatgagattaa**catcttgcaaaaaccaaagacgcagatgcaggcgg  
tctggaggaggtggcaaggtggttaaaggaaagggaggcgggtggcggacctttcaaagac  
atcttgccagaagtcgagttgaccgacatggacaacaaatcaagagcatttttgatggt  
cttgagataagctcaaaggtggtttgacctcttcaagaaaggttttgatgcagcattt  
agaccagaaggtataaaacgcattaagactgccttagaccaaatagctaagacaatggga  
gaaatcgccactgacccaaggttgtgaatgcctttaaccgaatggctgagaaaattgct  
tatgcttttagggcaagtgcaggtcaataaccactatcgggctaggtatcgggtgttttc  
cttgccgaaagtattgcaaatggccttggaaggcaaaaagaacgcattatcagggcgcta  
gtcgcctttgtttgataatggtggtaacctttccgaggcagtaggaaacatagctcaggac  
ttttctagtgccttctacgacgctcattacctcaactgggtgcgggttcgtagcggtagcgt  
attgtgtcaactctggtgagttgacatctaccattggtgaagttggtagtaaatagca  
ggaagttgtttaaggttttgaaaaagtcggtgtgacaagcgtcctaaaatttcatca  
gtcttccaaagtttattagatactggtgcgctgtatgtgagagcattgaaaggtctggt  
aacaatttggcgatggcttaagtcgtgtttatgatgaacatgtagtccttgcattaac  
tctattgctaagtcttttaaggttaattgacattattcagattctctgggagaaattcc  
tggcaacctttgctgagttttatcaggagatctcgggttagtattgaaggaatttca  
gatttattaggaggtggccttttagccactttgggactattggcggatgctattaagtta  
gtggcagatggtttcaccggtttttctgactggtgtaagaaaacaaagaacctatcttg  
gctttgataacaacttgcaaacgattaatttcttatcatgggctgaacaagccggggga  
cttgacaggagcattcagcttgtaggttagtaaggtctctttgattggtggagggattaag  
aatctaggtcttgctattaaagcattgacatttgataagttggtcagttttgggtgaaaca  
atctatttgaaacacttatatgcaaaagattttggtggtcaattcagggtaaaacaattgca  
cagctaggaaaaactgctttagaacttggtaaatcagctctagcatggactgctcatgca  
gcaaaaatgggattagcaaccgcgcggaatttgacacattctggtgcagcaggagtcgct  
acagctgcaacatgggcttttaatgcagcgttagcagttttgacaagccaataacatgg  
attattgcagcaatcgcagctttgattgctatcgggtgtcttgctctacaaaactgggac  
actggtgttgagtttgctaaaactgcatggcaaggactatgtgattttattagtggtatt  
tgctgagctattggcgaatttttcagtggtctatggacaaaactacaagaaatctttgag  
ccgataggatcaatgggtttggcgagaagttccagcaagcatgggatgccattgtcaacatc  
ttctctggatcggagagtggttctctggtgtattccaaggtgcatgggacgctatcggt  
aatatcttcaactccaatcggctcatggtttggacaacgttgggcagatgtgactagtgc  
ttggctaataatcggggcatggtttactgacatattccaaaagcatggactggtctaaca  
aacatctttagcaaacctaggtttatggtttggcgagagatgggcagatgttacaagtggt  
cttgcaaatgtatcttctgggtttgggaatatggttactagtgccttataatgcagtcag  
aacgcgtttagttcaattgggtggcttcttcagcgggtgtatggtcaacggttcaaagcata  
tttgcaatgctggacaaaaggttggttagcgtgtaggtggagcgtttaagagtgccggtc  
aatgcgggttcttggaacgattgaaaatgtagtcaatggcttcatcggaatgattaatgga

gttttaggcggttgctcagaaacttacctggtctaggatggggttggtagtgtaagcacagtt  
agcctccctcgtcttgcccgtggtggtatcgctcgatagccaacaatcgccatgattggt  
gaagctggtaaagagggcggtcgtaccacttgaaaatacaggatttatccaaacacttga  
cgagtagtcagcagtgcggtagtaaatacctggctggtattagtcacaaggtggtttt  
tctagcgacggcgacatcggtatttcaaatacgcaggccatgagttcggacgggtagctatc  
caagaaatcaacaaggaacatgaacgagcaggtcaaaccttgctcaagatttag

| Protein    | Forward (5'→3')                               | Reverse (5'→3')                                      |
|------------|-----------------------------------------------|------------------------------------------------------|
| sp670_2141 | CCCG GAT ATC GCA ACT<br>CTT GAT GAA TTG AAA G | AAAGCA GCG GCC GCG GTT AAT<br>CTC ATC AAA TCC CAA AA |

1100 nt cloned
